# Supplementary material for: Multiparameter functional diversity of human C2H2 zinc finger proteins
Source: Genome Res. 2016 Dec;26(12):1742–52. doi: 10.1101/gr.209643.116 (PMC5131825; doi:10.1101/gr.209643.116)
Supplement: Supplemental Material [file supp_gr.209643.116_Supplemental_Table_S1.xlsx]

## Sheet: Legend
Supplemental Table S1 (related to Figure 1): Overview table. Gene IDs, construct IDs, DNA sequences and information about experiments performed for all constructs used in this study.

## Sheet: Sheet1
UniProtID	Symbol	Construct ID	Number of ChIP-seq replicates	AP-MS data	Number of RNA-seq replicates	Type of RNA-seq library	Endogenous expression levels of C2H2-ZFs in HEK293 [RPKM]	Expression levels of C2H2-ZFs after overexpression [RPKM]	Auxiliary Domains	Transcript sequence
P59817	ZNF280A	JG-ZNF-62	1	Yes					-	atgggagatatctttttgtgtaagaaagtggaatcaccaaagaagaatttgagagaatccaaacaaagggaggaggatgatgaagatccagatctgatctatgttggggtggagcatgtacatagagatgctgaagttctctttgtcgggatgatttcaaattcaaaaccagtcgtttcaaacattttgaacagagtcaccccaggctcaaattcaagaagaaagaaaggccacttccgtcaatatcctgctcacgtgtcgcagcctgcaaatcatgtgacctctatggcaaaagccatcatgccggtttctctgtctgaggggcgatcgacagatagtcctgtcactatgaagtcttcatctgaacctggttataaaatgagctcaccacaagttgtt…
Q96PE6	ZIM3	JG-ZNF-40	1	Yes					KRAB	atgaacaattcccagggaagagtgaccttcgaggatgtcactgtgaacttcacccagggggagtggcagcggctgaatcccgaacagagaaacttgtacagggatgtgatgctggagaattacagcaaccttgtctctgtgggacaaggggaaaccaccaaacccgatgtgatcttgaggttggaacaaggaaaggagccatggttggaggaagaggaagtgctgggaagtggccgtgcagaaaaaaatggggacattggagggcagatttggaagccaaaggatgtgaaagagagtctcgcaagagaagtcccatcaatcaataaggaaacgctgactacgcagaaaggtgtagaatgtgacggatctaagaaaatacttccactgggcatagatgat…
Q9BWW7	SCRT1	JG-ZNF-22	1	Yes	1	mRNA V2	0.250579	36.7803	-	atgcccaggtccttcctggtcaagaaggtcaaacttgacgcgttctcttcggccgacctggagagcgcctacggacgcgcccgcagcgacctcggcgcgccactgcacgataaagggtacctcagcgactacgtggggccctcgtccgtctacgatggcgacgccgaggctgcgctgctcaaagggccgtcgccggagcccatgtacgcagcagctgtgcgtggagagctgggtccggcggctgcagggtctgcgccgccgcccaccccgcgcccggagctggccaccgctgcgggcggctacatcaacggcgacgcggccgtcagcgagggctacgcggcggacgccttcttcatcaccgacgggcgctcgcggcgtaaggcttccaatgccggctct…
Q9C0F3	ZNF436	JG-ZNF-85	1	Yes	1	mRNA V2	4.28336	256.53	KRAB	atggcagccaccctgctcatggctgggtcccaggcacctgtgacgtttgaagatatggccatgtatctcacccgggaagaatggagacctctggacgctgcacagagggacctttaccgggatgttatgcaggagaattatggaaatgttgtctcactagattttgagatcaggagtgagaacgaggtaaatcccaagcaagagattagtgaagatgtacaatttgggactacatctgaaagacctgctgagaatgctgaggaaaatcctgaaagtgaagagggctttgaaagcggagataggtcagaaagacaatggggagatttaacagcagaagagtgggtaagctatcctctccaaccagtcactgatctacttgtccacaaagaagtccacaca…
P36508	ZNF76	JG-ZNF-116	1	Yes	1	mRNA V2	4.94689	84.28	-	atggagagcttggggctgcacacggtgacccttagtgatgggacaacagcctacgtccagcaagctgtcaaaggagagaagcttcttgaagggcaggtgatccagctcgaggatgggaccaccgcatacattcaccaggtgacggtacagaaagaagctctctcctttgaggatggtcagcctgtgcagctggaagatggcagcatggcttacatacaccgcacacccagagaaggctatgaccccagcaccctggaagccgtccaactggaagatggctccactgcctacattcaccaccctgtggctgtgccatcggagagcaccatcctggccgtacagacagaggtgggcttggaggacctggcagcagaggatgatgagggcttcagtgcagac…
P17022	ZNF18	JG-ZNF-48	1	Yes					SCAN,KRAB	atgcccgttgacttggggcaggccctaggcctgctgccatcgctggcgaaggccgaggactcccagttctcagaatcagatgctgcccttcaagaggaactctccagccctgagaccgcacgccagcttttcaggcagttccgttaccaggtgatgtctgggcctcatgagaccttgaagcaacttcggaagctctgtttccagtggctacagccagaggttcacaccaaagagcagatcctagagatcctcatgttggagcagtttctgaccatcctgcctggggagatccagatgtgggtgcggaaacagtgtccaggaagtggagaagaggcagtgacccttgtggaaagcttgaagggggacccccagagactgtggcaatggatcagtatccag…
P10075	GLI4	JG-ZNF-5	1	Yes					-	atggcagccctaggggacattcaggagtccccttctgtcccgtcccctgtcagtctctcatcaccggggacacctggaacccagcaccacgagcctcagcttcacctccatgggcatcaacatggctcccctggctccagccctaaggtgctctcccagccgtccgacctggatctccaagacgtagaggaagtggagatcggcagagacaccttctggcccgactccgagcccaagccggagcaggctccacgctctcctggctctcaggcccctgacgagggggcgggcggggcgctgcgcagcctcctgaggagccttccccgcagggcccggtgcagcgccggcttcgggcctgaatccagcgcggagcggccggcgggccagccgcctggggcc…
Q9Y2Q1	ZNF257	JG-ZNF-57	2	Yes	1	mRNA V2	0.548397	127.375	KRAB	atgttagagaactacagaaacctggtcttcctgggtattgctgtctctaagccagacctgatcacctgtctggagcaaggaaaagagccctgtaatatgaagagacatgagatggtagccaaacccccagttatgtgttctcatattgctgaagacctttgcccagagcgagacataaaatattttttccaaaaagtcatactgaggagatatgataaatgtgaacatgagaatttacaattaagaaagggctgtaaaagtgtggatgagtgtaaggtgtgcaaaggaggttataatggacttaaccaatgtctgataactacccagagcaaaatgtatcaatgtgataaatatgtaaaagtcttctataagttttcaaattcagatagacataagata…
Q8TD23	ZNF675	JG-ZNF-109	1	Yes	2	both	1.63482	97.1191	KRAB	atgggactgttgacatttagggatgtggccatagaattctctctggaagaatggcaatgcctggacactgcacagcggaatttatataaaaatgtgattttagagaactacagaaacctggtcttcctgggtattgctgtctctaagcaagacctgatcacctgtctggagcaagaaaaagagcctttgactgtgaagagacatgagatggtgaatgaacccccagtaatgtgttctcattttgcccaagagttttggccagagcagaacataaaagattcttttgaaaaagtgacactgagaagatatgaaaaatgtggaaatgataattttcagttaaaaggctgtaaaagtgtggatgaatgtaagttgcacaagggaggttataatggacttaac…
Q9ULM2	ZNF490	JG-ZNF-90	1	Yes	1	mRNA V2	0.495791	66.9363	KRAB	atgcgcaggaattccagtctcagtttccagatggagcgacccctcgaggagcaagtccagagcaagtggtcgtctagtcaaggccgcacaggaacaggagggtctgatgtcctccagatgcagaacagtgaacaccatggacaaagcatcaagactcaaactgactccatctcccttgaggatgtggctgtgaacttcaccctggaggagtgggctttgctggatcctggccagaggaatatctacagagatgtgatgcgggcaaccttcaagaacctggcctgtataggggaaaaatggaaagaccaggatattgaagatgaacacaaaaaccagggaagaaatctaagaagtcctatggttgaagcactctgtgaaaataaagaagattgtccatgt…
A2RRD8	ZNF320	JG-ZNF-66	2	Yes	3	both	0.45793	59.8098	KRAB	atggctctttctcagggtctactgacattcagggatgtggccatagaattctctcaggaggagtggaaatgcctggaccctgctcagaggactctatacagagacgtgatgctggagaattataggaacctggtctccctggatatctcttccaaatgcatgatgaatacattgtcatcaacagggcaaggcaatacagaagtgatccacacagggacattgcagagacaagcaagttatcacattggagcattttgctcccaggaaattgagaaagacattcatgactttgtgtttcagtggcaagaagatgaaacaaatgaccatgaagcacccatgacagaaataaaaaagttgactagtagtacagaccgatatgatcaaaggcatgctggaaac…
Q9NQX6	ZNF331	JG-ZNF-70	2	Yes					KRAB	atggcccagggtttggtgacgttcgccgacgtagccatagacttttctcaggaggagtgggcctgtctgaactctgctcagagggacctgtactgggacgtgatgctggagaactacagtaacttggtctcactggatttggagtcagcatatgaaaataagagtttacctacaaaaaaaaacattcatgaaataagggcttccaaaaggaattcagatagaagaagtaaatcccttggccgtaactggatatgtgaaggtacgcttgaaagaccacagcgctccagagggaggtatgtcaatcagatgatcatcaattatgtcaaaaggcctgctactagagaaggcacccctcctagaacacatcagagacatcataaggagaattcctttgaatgt…
Q96MM3	ZFP42	JG-ZNF-37	2	Yes					-	atgagccagcaactgaagaaacgggcaaagacaagacaccagaaaggcctgggtggaagagcccccagtggggctaagcccaggcaaggcaagtcaagccaagacctgcaggcggaaatagaacctgtcagcgcggtgtgggccttatgtgatggctatgtgtgctatgagcctggccctcaggctctcggaggggatgatttctcagactgttacatagaatgcgtcataaggggtgagttttctcaacccatcctggaagaggactcactttttgagtccttggaatacctaaagaaaggatcagaacaacagctttctcaaaaggttttcgaagcaagctcccttgaatgttctttggaatacatgaaaaaaggggtaaagaaagagcttccacaa…
Q6P9G9	ZNF449	JG-ZNF-86	1	Yes	2	both	3.5097	177.264	SCAN	atggctgtggccctgggttgtgcaatccaggcatccttgaatcaaggctctgtgtttcaagaatatgatactgactgtgaagttttccgtcagcgcttcaggcagttccagtacagagaagcagctgggcctcatgaagcatttaacaaactctgggagctttgctgtcaatggctgaagccaaagatgcgctctaaggaacaaatcctggagctgctagtgttggagcaattcctaactatcctgcccacagagatagagacctgggtgagggagcactgcccagagaatagagaaagagttgtgtcactgatagaagacttacagagagaacttgagataccagagcagcaggttgatatgcatgacatgctcttggaagaactggcaccagtggga…
Q6IQ21	ZNF770	JG-ZNF-118	1	Yes	1	mRNA V2	9.77161	83.4763	-	atgatggctgaaaacaatttaaaaatgctaaagattcaacagtgtgtggtagccaacaaactacctagaaacaggccatatgtttgcaatatttgttttaagcactttgaaacaccatcaaaattagctaggcactatctcattcatactggtcaaaagccatttgaatgtgatgtgtgtcataaaacctttagacaactagttcatctggagaggcatcaactaactcatagtctgccttttaaatgtagtatttgtcagcgtcactttaaaaatctgaagacatttgtgaagcaccaacaacttcacaatgaaacctatcagaataatgttaaacaggtcagaagattgctggaggccaagcaagaaaagtcaatgtatggagtgtataatactttt…
P52741	ZNF134	JG-ZNF-42	1	Yes	1	mRNA V2	6.28487	155.175	-	atgactctagtcacagcaggaggggcttggacaggccctggttgttggcatgaagtgaaggatgaagagtcatcttctgaacagagcatttctatagcagtgtcacatgttaatacttccaaggcaggtttgcccgcacagacggctctcccttgtgacatatgtggccccatcttgaaagatattttgcacctggatgaacaccagggtacacaccatggactgaaacttcacacatgtggggcatgtgggagacaattctggttcagtgcaaaccttcatcagtaccagaagtgttacagtatagagcaacccttaagaagggataaaagtgaggcctcaattgtgaagaactgcacagttagcaaagaacctcatccgtcagagaagccctttacg…
Q0VGE8	ZNF816	JG-ZNF-123	1	Yes	1	mRNA V2	0.663098	217.652	KRAB	atgttacgtgaggaagccaccaagaagagcaaagaaaaggagccagggatggctcttcctcagggacgcttgactttcagggatgtggctatagagttctctttggaggagtggaaatgcctgaaccctgcacagagggctttatacagggctgtgatgttggagaactacaggaacctggagtttgtggatagctctttaaaatccatgatggagttctcatcaaccaggcacagtattacaggagaagtgatccacacagggacgttgcaaagacataaaagtcatcacattggagatttttgcttcccagaaatgaagaaagatattcatcactttgagtttcagtggcaagaagttgaaagaaatggccatgaagcacccatgacaaaaatcaaa…
Q8NEM1	ZNF680	JG-ZNF-111	2	No	1	stranded total RNA	2.83054	40.819	KRAB	atgccaggaccacctggaagcctagaaatgggaccactgacatttagggatgtggccatagaattctctctggaggagtggcaatgcctggacactgcacaacggaatttatataggaaagtgatgtttgagaactacagaaacctggtcttcctgggtattgctgtctctaagcctcacctgataacctgtttggagcaaggaaaagagccctggaataggaagagacaggagatggtagccaaacccccagttatatattctcatttcactgaagacctttggccagagcatagcataaaagattcttttcaaaaagtgatactgagaggatatggaaaatgtggacatgagaatttacaattaagaataagttgtaaaagtgtggatgagtctaag…
Q96SR6	ZNF382	JG-ZNF-78	5	Yes	1	mRNA V2	5.11076	81.092	KRAB	atgcccttacagggatcagtgtcattcaaggatgtgactgtggacttcacccaggaggagtggcagcaactagaccctgctcagaaggcgctttacagggatgtgatgttggaaaactattgccacttcgtatctgtggggtttcacatggctaagcctgatatgatccgcaagttggaacaaggagaagagctatggacacagagaatttttccaagttacagctacctagaagaagatgggaaaactgaagatgtcttagtgaagttcaaagaataccaagacaggcattctagacccctcatattcatcaaccacaaaaaactaattaaggagagaagtaatatttatggtaaaacatttactctaggcaagaaccgtatttcaaaaacaatacta…
Q6U7Q0	ZNF322	JG-ZNF-67	2	Yes	1	mRNA V2	1.11167	8.63447	-	atgtacacttcagaagagaaatgtaatcagagaactcaaaaaaggaaaatatataatgtatgccctcggaagggtaaaaagatttttattcatatgcatgagattattcagatagatggtcatatataccagtgccttgaatgcaagcaaaacttctgtgaaaacttagctcttattatgtgtgagagaacccatactggggagaaaccttataaatgtgatatgtgtgagaaaacctttgtccaaagctcagatcttacttcacaccagaggatccacaattacgagaaaccttataaatgtagcaaatgtgagaagagcttttggcatcacttagcgctttcaggacatcagagaacacatgcaggtaaaaaattctatacatgtgacatttgtggc…
P51814	ZNF41	JG-ZNF-81	3	No	1	mRNA V2	2.24837	121.622	KRAB	atggcagctaatggggactctcccccatggtccccggccctggctgcagagggacgtggcagctcatgtgaggcttcagtgtcatttgaggacgtgactgtggacttcagcaaggaggagtggcagcacttggaccctgcccagagacgcctgtactgggatgtgacactagagaactacagccacctgctctcagtggggtaccaaattcccaagtcagaggctgccttcaagttggagcaaggagaggggccatggatgctggagggggaagccccacatcagagctgttcaggtgaggctattgggaaaatgcagcaacagggaattcctggaggaattttcttccactgtgagagatttgatcaacccataggagaagattcattatgttctatt…
Q15916	ZBTB6	JG-ZNF-34	3	Yes					BTB	atggctgctgagtctgatgttctgcatttccagtttgaacagcaaggagatgtggtcttgcagaaaatgaatcttttgagacagcagaatttattttgtgatgtatcaatttacattaatgacactgagttccaggggcacaaggtgattttggctgcttgctccacttttatgagagatcagtttttactcacacagtcaaaacatgtcagaatcaccatcttacagagtgcagaagttggcagaaaattgttactgtcttgctatactggagcacttgaagttaaaaggaaagagcttttgaaatacttgactgctgccagttaccttcagatggttcacattgtggaaaagtgcacagaagctttgtcaaagtatctggaaattgatctttctatg…
Q99592	ZBTB18	JG-ZNF-30	2	Yes					BTB	atgtgtcctaaaggttatgaagacagtatggagtttccagaccatagtagacatttgctacagtgtctgagcgagcagagacaccagggttttctttgtgactgcactgttctggtgggagatgcccagttccgagcgcaccgagctgtactggcttcatgcagcatgtatttccacatcttttacaaggaccagctggacaaaagagacattgttcatctgaacagcgacattgttacagcccccgctttcgctctcctgcttgaattcatgtatgaagggaaactccagttcaaagacttgcccattgaagacgtgctagcagctgccagttatctccacatgtatgacattgtcaaagtctgcaaaaagaagctgaaagagaaagccaccacggag…
P25490	YY1	JG-ZNF-27	4	Yes	2	both	16.1198	156.412	-	atggcctcgggcgacaccctctacatcgccacggacggctcggagatgccggccgagatcgtggagctgcacgagatcgaggtggagaccatcccggtggagaccatcgagaccacagtggtgggcgaggaggaggaggaggacgacgacgacgaggacggcggcggtggcgaccacggcggcgggggcggccacgggcacgccggccaccaccaccaccaccatcaccaccaccaccacccgcccatgatcgctctgcagccgctggtcaccgacgacccgacccaggtgcaccaccaccaggaggtgatcctggtgcagacgcgcgaggaggtggtgggcggcgacgactcggacgggctgcgcgccgaggacggcttcgaggatcagattctcatc…
B2RXF5	ZBTB42	JG-ZNF-32	1	Yes	1	mRNA V2	1.72123	74.2283	BTB	atggagttccctgagcacggcggacggctgctgggccgcctgaggcagcagcgcgagctgggcttcctatgcgactgcaccgtgctggtgggcgacgcgcgcttcccggcccaccgtgccgtgctggccgcgtgcagcgtctacttccatctcttctacagggaccggcccgcgggcagtcgcgacacggtgcggctcaacggcgacatcgtcacggcgcccgccttcggccgcctactggacttcatgtacgagggccgcctggacctgcgcagcctgcctgtggaggacgtcctggcagccgccagctacctgcacatgtatgacatcgtcaaggtctgcaagggcaggctccaggagaaggatcgaagtctggacccggggaaccctgcccctggg…
P10073	ZSCAN22	JG-ZNF-127	4	Yes	1	mRNA V2	1.70488	184.298	SCAN	atggccatccccaagcactccctgagcccagtgccgtgggaagaggacagcttccttcaagtgaaggtggaggaggaagaggaagccagcctctcccagggcggagaatccagccatgaccacattgctcactctgaggctgcacgcctgcgcttccggcacttccgctatgaggaggcatctggtccacacgaggccctggcccacctccgagcgctgtgctgtcagtggctgcagcccgaggcgcactccaaggagcagatactggagctgctggtgctggagcagttcctgggtgcgctgcccccagagatccaagcctgggtgggagcccagagtcccaagagcggagaggaagccgctgtgctggtggaggatctgactcaggtgctggacaag…
Q8TD94	KLF14	JG-ZNF-12	1	Yes					-	atgtcggccgccgtggcgtgcctggactacttcgccgccgagtgcctggtgtccatgtccgcgggcgccgtggttcaccgccgcccgccggaccccgagggcgcgggtggagccgcaggctcggaggtgggtgcggcgcatccggagtccgctctgccgggtccggggccatcggggcccgcgtcggtcccccagctcccgcaggtccccgcccccagccccggcgcgggcggcgccgcgccccacctgctggctgcaagcgtctgggcggacttgcgcggcagctctggcgagggctcctgggagaactcgggggaagctccacgcgcctcgtccggcttctccgacccgatcccgtgctccgtccagaccccgtgctccgagctggctcccgcctcc…
Q13351	KLF1	JG-ZNF-9	1	Yes					-	atggccacagccgagaccgccttgccctccatcagcacactgaccgccctgggccccttcccggacacacaggatgacttcctcaagtggtggcgctccgaagaggcgcaggacatgggcccgggtcctcctgaccccacggagccgcccctccacgtgaagtctgaggaccagcccggggaggaagaggacgatgagaggggcgcggacgccacctgggacctggatctcctcctcaccaacttctcgggcccggagcccggtggcgcgccccagacctgcgctctggcgcccagcgaggcctccggggcgcaatatccgccgccgcccgagactctgggcgcatatgctggcggcccggggctggtggctgggcttttgggttcggaggatcactcg…
O75820	ZNF189	JG-ZNF-50	1	Yes	1	mRNA V2	5.63737	145.064	KRAB	atggcttccccgagccccccgccggagtcgaaggaggagtgggattatctggacccagctcagagaagcctgtataaagatgtcatgatggagaattatggaaacctggtctcactggatgttttgaacagagataaggatgaggagccaactgtaaaacaagagattgaagaaattgaggaagaagtggaaccacagggtgtaatagttacaagaatcaaaagtgaaattgaccaggatcctatgggtagagaaacatttgaacttgttggtaggttagataaacaaagagggatcttcctatgggaaataccaagggaatctttgacccaggaacagagaatgttcagagaaaacactaacattatccgtaaaagaccaaactcagaagagaaatgc…
Q3MIS6	ZNF528	JG-ZNF-94	4	Yes	2	both	2.0373	93.4114	KRAB	atggcccttactcagggacccttgaaattcatggatgtggccatagagttctctcaggaagagtggaaatgcctggaccctgcgcagaggactttatacagggacgtgatgttggagaattataggaacctggtctccctgggaatctgtcttcctgacctgagtgttacctccatgttagagcaaaagagagatccctggactctgcagagtgaagagaaaatagcaaacgatccagacggcagggagtgcatcaaaggtgtgaacacagagaggagctctaaattgggaagtaatgcaggaaacaagccttgtaaaaatcaacttggattcacttttcagttacatctgagtgatctacagctatttcaagctgaaaggaaaatttctgggtgtaag…
Q9Y4X4	KLF12	JG-ZNF-11	1	Yes	1	mRNA V2	3.9699	88.6804	-	atgaatatccatatgaagagaaaaacaataaagaatatcaacacctttgagaacagaatgttaatgcttgatgggatgccggcagtcagagtcaaaacagagcttttggaatctgaacaagggtctccaaacgtccacaactatcccgatatggaagccgttcccctgttgctaaataatgtgaaaggggagcccccggaggactcgttatctgtagatcacttccaaacacaaactgagccagtggacttgtcaataaacaaagccaggacgtcccctactgccgtttcatcctccccagtttccatgacagcatctgcctcctcaccttcttcaacttcaacctcttcatcgtcttctagtcgtctagcctcatccccaactgttatcacatcagta…
O75840	KLF7	JG-ZNF-14	1	Yes	1	mRNA V2	1.04641	39.8621	-	atggacgtgttggctagttatagtatattccaggagctacaacttgtccacgacaccggctacttctcagctttaccatccctggaggagacctggcagcagacatgccttgaattggaacgctacctacagacggagccccggaggatctcagagacctttggtgaggacttggactgtttcctccacgcttcccctcccccgtgcattgaggaaagcttccgtcgcttagaccccctgctgctccccgtggaagcggccatctgtgagaagagctcggcagtggacatcttgctctctcgggacaagttgctatctgagacctgcctcagcctccagccggccagctcttctctagacagctacacagccgtcaaccaggcccagctcaacgcagtg…
Q9BU19	ZNF692	JG-ZNF-113	1	Yes	1	mRNA V2	3.12333	88.0048	-	atggcttcctccccggcggtggacgtgtcctgcaggcggcgggagaagcggcggcagctggacgcgcgccgcagcaagtgccgcatccgcctgggcggccacatggagcagtggtgcctcctcaaggagcggctgggcttctccctgcactcgcagctcgccaagttcctgttggaccggtacacttcttcaggctgtgtcctctgtgcaggtcctgagcctttgcctccaaaaggtctgcagtatctggtgctcttgtctcatgcccacagccgagagtgcagcctggtgcccgggcttcgggggcctggcggccaagatggggggcttgtgtgggagtgctcagcaggccataccttctcctggggaccctctttgagccctacaccttcagaggca…
Q86TJ5	ZNF554	JG-ZNF-98	1	Yes	1	mRNA V2	1.49597	243.923	KRAB	atggtcacctgcgcccacctgggccggcgcgcgcgactcccggcagctcagccctctgcctgcccaggaacctgcttttcccaagaggagagaatggctgctgggtacctgccccgctggtcccaggaattagtaacctttgaggacgtgtccatggacttctcccaggaggagtgggagttgctggagcctgctcagaagaacctgtacagagaggtgatgctggagaactacaggaacgtggtctccctggaagccttgaagaaccaatgtactgatgtggggattaaagagggtccactttccccagcacaaacctcacaagtcactagtctttcctcatggacggggtatttactttttcaaccagtggcttcttcccacttggagcaaagagaa…
Q03923	ZNF85	JG-ZNF-124	1	Yes	1	mRNA V2	1.79231	77.7921	KRAB	atgagcctcagcgcccagccctcttcaagtttttataaaccagtttcagaagttatgtgttctcattttgcccaagacctttggccggagcagaatataaaagattctttccaaaaagtgacactgaaaagatatggaaaatgtagacatgaaaatttaccattaagaaaaggctgtgaaagtatggatgagtgtaagatgcacaaaggaggttgtaatggacttaaccaatgtctcacagctacccagagcaaaatatttcaatgtgataaatatgtaaaagtcgctcataaattttcaaattcaaacagacatgagataagacatactaaaaagaaacctttcaaatgtacaaaatgtggcaaatcatttggcatgatttcatgcctaactgaacat…
P52738	ZNF140	JG-ZNF-44	1	Yes					KRAB	atgtctcaggggtcagtgacattcagagatgtggccatagacttctcccaggaggagtggaaatggcttcagcctgctcaaagagatttgtacagatgtgtaatgttggagaactatggccatctggtctcactgggtctttccatttctaagccagatgtggtttccttattggagcaagggaaagaaccctggctggggaaaagggaagtgaaaagagatctgttttcagtttcagagtcaagtggtgagatcaaagacttttcaccaaaaaatgtcatttatgatgactcatcccagtatttgatcatggaaagaattctaagtcaaggccctgtgtattccagttttaaaggaggctggaaatgcaaggatcatactgagatgctgcaagaaaat…
Q6ZN55	ZNF574	JG-ZNF-100	2	Yes	1	mRNA V2	6.84919	125.935	-	atgactgaggaatcagaggagacagtcctgtacattgagcaccgctatgtctgctctgagtgcaaccagctgtatggatcactggaagaggtgcttatgcaccaaaactcccacgtgccccagcagcactttgagctggtgggcgtggctgatcccggagtcactgtggccacagacacagcttcaggcacgggcctctatcagacccttgtgcaggagagccagtaccagtgcctggagtgtggtcaactgctgatgtcacccagccagctcctggagcaccaggagctgcacctgaagatgatggcaccccaggaggcagtgccagctgagccatcacctaaggcaccacccctgagctccagcaccatccactacgagtgtgtggattgcaaggct…
Q8NHY6	ZFP28	JG-ZNF-35	2	Yes	1	mRNA V2	1.52537	179.699	KRAB,KRAB	atgcggggggcggcgagcgcgagtgtccgcgagccgacgccgctcccgggtagaggcgccccccgcacaaagccccgggcgggccgaggcccgactgtagggactccagccaccttggtcctccctggccggggaaggccgcgctcaaggaatggcctcgcatccaaaggccagcgaggagcggcccctacggggcctgggcacagagctctgccttccagggacactgctcttccccaggagagaaacaagaagctggaggctgtggggacaggaattgaacctaaagccatgtcccagggcttggtgacatttggggatgtggctgtagatttctcccaagaggagtgggagtggctgaaccccattcagaggaacttgtacaggaaggtgatgttg…
Q8N9Z0	ZNF610	JG-ZNF-106	1	Yes	1	stranded total RNA	0.885896	69.7152	KRAB	atgctatgtgatgaagaagcccagaagaggaaagcaaaggagtcagggatggctcttcctcagggacgcttgacattcatggatgtggccatcgaattctctcaggaggagtggaaatccctggaccctggacagagggctttatacagggacgtgatgttggagaactacaggaacctggtctttctggggaggagctgtgtattgggaagcaatgcagaaaacaagcctattaaaaatcaacttggattaacccttgagtcacatctgtctgaattgcagctgtttcaagccggaaggaaaatttacagaagtaatcaagttgaaaagtttacaaaccatcgttcctcagtttcaccacttcaaaaaatttcttctagtttcacaacacacattttt…
Q9Y330	ZBTB12	JG-ZNF-28	6	Yes	1	mRNA V2	7.56543	502.341	BTB	atggcctctggggtggaagtcctgcgcttccagctgcccggccacgaggccgcaacgctacggaacatgaaccagctccgggcagaggagcggttctgcgacgtgaccattgtggccgacagcctcaagtttcgaggccacaaggtcatcttggccgcctgctcacccttcctgcgggaccagttcctgctgaaccccagctcggagctgcaggtctccctgatgcacagtgcacgcatcgtggccgacttgctcctctcctgctacacgggcgccttggaattcgctgttagggacatcgtcaactaccttacagccgcctcctacctgcagatggagcacgtggtggagaaatgccggaatgccctcagccagttcattgagcccaaaataggcctc…
P49711	CTCF	JG-ZNF-1	7	No	1	mRNA V2	17.4343	165.872	-	atggaaggtgatgcagtcgaagccattgtggaggagtccgaaacttttattaaaggaaaggagagaaagacttaccagagacgccgggaagggggccaggaagaagatgcctgccacttaccccagaaccagacggatgggggtgaggtggtccaggatgtcaacagcagtgtacagatggtgatgatggaacagctggaccccacccttcttcagatgaagactgaagtaatggagggcacagtggctccagaagcagaggctgctgtggacgatacccagattataactttacaggttgtaaatatggaggaacagcccataaacataggagaacttcagcttgttcaagtacctgttcctgtgactgtacctgttgctaccacttcagtagaagaa…
Q02446	SP4	JG-ZNF-26	4	No	1	mRNA V2	2.1986	156.54	-	atgagcgatcagaagaaggaggaggaggaggaggcggcagcggcagcggcgatggctacagaaggagggaaaacctctgagccagagaataacaataaaaaacccaaaacctcaggctcccaggactctcagccctctcctctggctttactggcagctacttgcagcaaaatagggactcctggtgaaaatcaagcaactggacaacaacaaattattatagatccaagtcaaggattggtgcaacttcaaaatcaaccacaacagctagaactggtaacaacgcaacttgctggaaacgcttggcaacttgttgcctccactcctcctgcttcaaaagagaataacgtttctcaaccagcctctagttcgtctagttcttccagcagtaataacggg…
Q96NJ6	ZFP3	JG-ZNF-36	1	Yes	4	both	0.136021	63.5312	-	atggggactgagaacaaggaggtgattcccaaggaagaaatttctgaagaatctgagccacatgggtcattattagaaaaatttccaaaagtggtttaccaaggtcatgagtttggagcaggatgtgaagaagacatgttggagggacattcgagagagtccatggaagaggttatagagcagatgtctcctcaggagagagactttccatcagggttgatgatctttaagaaatcaccctcaagtgagaaagaccgggagaataatgagagtgagagaggctgcagtcccagcccaaatctggttacacatcagggagatacaacagagggagttagtgcatttgctacctctggccaaaacttcctagagattttagaatctaacaaaacacagaga…
P56270	MAZ	JG-ZNF-15	1	Yes					-	atggtgcccctgagcctcctgagcgtgccccagctgagcggagccggcgggggagggggagaggcgggtgccggcggcggcgctgccgcagtggccgccggtggcgtggtgaccacgaccgcctcggggaagcgcatccggaagaaccatgcctgcgagatgtgtggcaaggccttccgcgacgtctaccacctgaaccgacacaagctgtcgcactcggacgagaagccctaccagtgcccggtgtgccagcagcgcttcaagcgcaaggaccgcatgagctaccacgtgcgctcacatgacggcgctgtgcacaagccctacaactgctcccactgtggcaagagcttctcccggccggatcacctcaacagtcacgtcagacaagtgcactcaaca…
Q9UIH9	KLF15	JG-ZNF-13	3	Yes					-	atggtggaccacttacttccagtggacgagaacttctcgtcgccaaaatgcccagttgggtatctgggtgataggctggttggccggcgggcatatcacatgctgccctcacccgtctctgaagatgacagcgatgcctccagcccctgctcctgttccagtcccgactctcaagccctctgctcctgctatggtggaggcctgggcaccgagagccaggacagcatcttggacttcctattgtcccaggccacgctgggcagtggcgggggcagcggcagtagcattggggccagcagtggccccgtggcctgggggccctggcgaagggcagcggcccctgtgaagggggagcatttctgcttgcccgagtttcctttgggtgatcctgatgacgtc…
O95863	SNAI1	JG-ZNF-23	3	Yes					-	atgccgcgctctttcctcgtcaggaagccctccgaccccaatcggaagcctaactacagcgagctgcaggactctaatccagagtttaccttccagcagccctacgaccaggcccacctgctggcagccatcccacctccggagatcctcaaccccaccgcctcgctgccaatgctcatctgggactctgtcctggcgccccaagcccagccaattgcctgggcctcccttcggctccaggagagtcccagggtggcagagctgacctccctgtcagatgaggacagtgggaaaggctcccagccccccagcccaccctcaccggctccttcgtccttctcctctacttcagtctcttccttggaggccgaggcctatgctgccttcccaggcttgggc…
P28698	MZF1	JG-ZNF-17	2	Yes	1	mRNA V2	3.47339	54.3745	SCAN	atgaggcctgcggtgctgggctccccagaccgagcacccccagaagatgaggggcctgtcatggtgaagctagaggactctgaggaggagggtgaggctgccttatgggacccaggccctgaagctgcacgcctgcgtttccggtgcttccgctatgaggaggccacagggccccaagaggccctggcccagctccgagagctgtgtcgccagtggctgcgtccagaggtacgctccaaggagcagatgctggagctgttggtgctggagcagttcctgggcgcactgccccctgagatccaggcccgtgtgcaggggcagcggccaggcagccccgaggaggctgctgccctagtagatgggctgcgccgggagccgggcggaccccggagatgggtc…
O43296	ZNF264	JG-ZNF-60	2	Yes					KRAB	atggcggcagcggtgctgacggaccgggcccaggtgtctgtgacctttgatgatgtggctgtgactttcaccaaggaggagtgggggcagctggacctagctcagcggaccctgtaccaggaggtgatgctggaaaactgtgggctcctggtgtctctggggtgtcctgttcccaaagctgagctgatctgccacctagagcatgggcaggagccatggaccaggaaggaagacctctcccaagacacctgtccaggcgacaaaggaaaacctaagaccacagaacctaccacttgtgagccagccttgtcagagggaatctcacttcagggacaagtgacacaaggaaactcagtggactcacagttggggcaagccgaggatcaggatgggctatca…
P17019	ZNF708	JG-ZNF-114	1	Yes	1	mRNA V2	1.7285	93.6003	-	atgggaccattgacatttatggatgtggccatagaattctctctggaggagtggcagtgcctggacacagcacagcagaatttatataggaatgtcatgttagagaattatagaaacctggtattcctgggtattgctgtgtctaatttagacctgatcacctgtctggagcaaggaaaagagccctggaatatgaagagacacgagatggcagccaaacccccagctatgtgttctcattttgccaaagaccttaggccagagcaatatataaaaaattctttccaacaagtgatactgagaagatatggaaaatgtggatatcagaaaggctgtaaaagtgtggatgagcataagttgcacaaaggaggtcacaagggacttaaccggtgtgtgaca…
Q13118	KLF10	JG-ZNF-10	1	Yes	2	both	5.2911	85.4482	-	atggaggaaagaatggaaatgatttctgaaaggccaaaagagagtatgtattcctggaacaaaactgcagagaaaagtgattttgaagctgtagaagcacttatgtcaatgagctgcagttggaagtctgattttaagaaatacgttgaaaacagacctgttacaccagtatctgatttgtcagaggaagagaatctgcttccgggaacacctgattttcatacaatcccagcattttgtttgactccaccttacagtccttctgactttgaaccctctcaagtgtcaaatctgatggcaccagcgccatctactgtacacttcaagtcactctcagatactgccaaacctcacattgccgcacctttcaaagaggaagaaaagagcccagtatctgcc…
Q9Y2X9	ZNF281	JG-ZNF-63	1	Yes	1	mRNA V2	13.4712	435.428	-	atgaaaatcggcagtgggttcctgagtggcggcggaggtaccggcagtagcggtggtagcggctccggcggcggtggtagtggcggcggcggcggcggcggcagcagcggcaggagggcagagatggaacccacctttccccagggtatggttatgttcaaccaccgtcttcccccggtcaccagcttcacccggccggcggggtcggccgcccctcccccgcaatgcgtgttatcctcctctacctccgcagccccggccgctgagcccccccctccgccagccccggacatgactttcaagaaggagccggcggcgtcagccgcggccttcccctcgcagaggacctcctgggggttcttgcagtctttggttagcatcaaacaggagaaacccgcg…
P10074	ZBTB48	JG-ZNF-33	1	Yes	1	mRNA V2	4.9917	90.6089	BTB	atggacggctccttcgtccagcacagtgtgagggttctgcaggagctcaacaagcagcgggagaagggccagtactgcgacgccactctggacgtggggggcctggtgtttaaggcacactggagtgtccttgcctgctgcagtcactttttccagagcctctacggggatggctcagggggcagtgtcgtcctccctgctggcttcgctgagatctttggcctcttgttggactttttctacactggtcacctcgctctcacctcagggaaccgggatcaggtgctcctggcagccagggagttgcgagtgccagaggccgtagagctgtgccagagcttcaagcccaaaacttcagtgggacaggcagcaggtggccagagtgggctggggccccct…
O75626	PRDM1	JG-ZNF-20	1	Yes	1	mRNA V2	0.0910422	212.349	SET	atggaaaagatctattccagaggggagcttcaccacttcattgacggctttaatgaagagaaaagcaactggatgcgctatgtgaatccagcacactctccccgggagcaaaacctggctgcgtgtcagaacgggatgaacatctacttctacaccattaagcccatccctgccaaccaggaacttcttgtgtggtattgtcgggactttgcagaaaggcttcactacccttatcccggagagctgacaatgatgaatctcacacaaacacagagcagtctaaagcaaccgagcactgagaaaaatgaactctgcccaaagaatgtcccaaagagagagtacagcgtgaaagaaatcctaaaattggactccaacccctccaaaggaaaggacctctac…
A6NGD5	ZSCAN5C	JG-ZNF-131	1	Yes	1	mRNA V2	0.172612	366.368	SCAN	atggctgcaaattgcacatcctcatggagtctaggagaatcctgcaacagccctgggtcagagccaccacagtccatgccatccccagcaactcaacttggaaatcatgacagtgatcctgagacttgtcacgtgaacttcaggatgttcagctgcccgaaggagtcggaccccatccaggctctgaggaaactcactgagctgtgccatctgtggctgaggcccgacctccacaccaaagagcagatcctggacatgctggtgatggagcagttcatgatctccatgccccaggagctccaggtcttagtcatgatgaacggtgtgcagagctgcaaagacctggaggacctgctacgaaataacagaagacccaagaaatggtctgtagtcagtttt…
Q8N9F8	ZNF454	JG-ZNF-88	2	Yes	4	both	0.228013	172.529	KRAB	atggctgtcagccacctgccaaccatggtccaggaatcggtgaccttcaaggatgtggctatactgttcacccaggaagagtgggggcagctgagccccgcccagagggccctgtacagggacgtgatgctggagaactacagcaacctggtctcactgggactcttaggacccaaaccagatacgttttcccagctagaaaaaagggaagtgtggatgccagaggacacccctggaggcttctgtcttgactggatgactatgcctgccagtaagaaatctactgtcaaggcagagattcctgaagaagaattggatcaatggacaataaaggaaagattcagtagcagtagtcactggaagtgtgctagcctgctggagtggcaatgtggaggccag…
Q7Z7K2	ZNF467	JG-ZNF-89	2	Yes	4	both	0.917678	171.953	-	atgagagagaccttggaggccctcagctccctgggattctctgtgggacagccagagatggccccccaaagtgagcccagggaaggatcccataatgcccaggagcagatgtcctcttctagggaagagagagcactgggggtgtgctcagggcacgaggcccctacaccggaggaaggtgcccacacagaacaagccgaggctccctgcagaggccaggcgtgctcagcacagaaggctcagcctgtgggtacctgcccaggagaggagtggatgattcggaaggtgaaggtggaggacgaagatcaggaggcagaagaggaggtcgaatggccccagcatctatcgttacttcccagcccctttcccgcgcctgacctggggcatctggctgccgcg…
Q8N2R0	OSR2	JG-ZNF-18	1	Yes	1	mRNA V2	1.63361	132.954	-	atggggagcaaggctctgccagcgcccatcccgctccacccgtcgctgcagctcaccaattactccttcctgcaggccgtgaacaccttcccggccacggtggaccacctgcagggcctgtacggtctcagcgcggtacagaccatgcacatgaaccactggacgctggggtatcccaatgtgcacgagatcacccgctccaccatcacggagatggcggcggcgcagggcctcgtggacgcgcgcttccccttcccggccctgccttttaccacccacctattccaccccaagcagggggccattgcccacgtcctcccagccctgcacaaggaccggccccgttttgactttgccaatttggcggtggctgccacgcaagaggatccgcctaagatg…
P58317	ZNF121	JG-ZNF-41	2	Yes					-	atggcagaaatccacaatggaggggaactctgtgactttatggaaaatggagaaatcttcagtgaacactcatgccttaatgcacacatgggaactgaaaatacaggggacacttatgactgtgatgagtatggagaaaactttcccatgttacacaacagtgcccctgctggagagacactttctgtgttgaatcagtgcagaaaagccttcagcctgccaccaaatgttcaccagagaacgtggataggagacaaatcctttgaatacagtgactgtgaggaagcctttgttgatcagtcacatcttcaggcaaataggataactcacaatggagaaacactctatgaacagaagcaatgtgggagagcttttacttactccacaagccatgctgtg…
O14978	ZNF263	JG-ZNF-59	1	Yes					SCAN,KRAB	atggcgtcgggcccgggctcccaggaacgggaagggctcctgatagtgaagctggaggaggactgcgcctggagccaggagctgcccccacctgacccaggaccgagccccgaggcctcccacttgcgcttcagacggttccgcttccaagaggcagctggtccccgggaagccctcagccggctccaagagctttgccatgggtggcttcggcctgagatgcgcacgaaggagcagatcttggagctgctggtgttagagcagttcctgaccatcctgccccaggagatccagagcagggtgcaggagctgcatccggagagcggcgaagaagcggtgacccttgtggaggatatgcagagagagcttgggagactgagacaacaggtcacaaaccat…
Q96PQ6	ZNF317	JG-ZNF-65	3	Yes	2	both	7.19305	406.42	KRAB	atgggaaggcacgctggcaagaggccctatcaccgccgcgactatggggtagcgttcaagggcaggccgcacctcactcagcacatgagcatgtacgacgggagaaaaatgcatgaatgtcatcagtgccaaaaagccttcaccacgagcgcgtccctcacacggcacaggagaatccacaccggggagaagccttacgagtgcagcgactgcgggaaagccttcaacgacccttcagcccttaggagccacgcaagaactcacctcaaagagaagccctttgactgcagtcagtgtggaaatgcattccggaccctctcggccctgaaaatccacatgcgagttcacactggcgagaggccttacaagtgtgatcagtgcgggaaggcttacggccgg…
Q9H4T2	ZSCAN16	JG-ZNF-126	3	Yes					SCAN	atgaccacagccctggaacctgaggaccaaaaaggacttctgataattaaggcagaggaccattactggggacaggattccagctcacaaaagtgcagtcctcacaggagggaactctatagacaacacttcaggaagctctgctatcaggatgcacctggaccccgtgaagctcttacccagctgtgggagctctgccgtcagtggctgaggccagaatgccacaccaaggagcagattttagacctgctggtgctagaacagttcctgagcattcttcctaaagacctgcaagcatgggtgcgtgcacaccatccagagactggagaggaggcagtgacggtactggaggatctggagagagagcttgatgaacctggaaagcaggtcccaggcaat…
P98182	ZNF200	JG-ZNF-51	1	Yes					-	atgatggctgcaaaagtggttcctatgcccccaaagccaaagcagtcctttatactgagagttccgccagactccaagctgggccaagacctacttcgagatgccactaacgggcccaagaccatccaccagctagtgctggagcacttcctcaccttcttgcccaagccaagcctggtccagcccagtcagaaagtcaaggagaccttggttattatgaaagatgtgagctcaagccttcagaacagagtgcatcctcgtcccttggtgaagcttctgcccaaaggagtccaaaaggaacaagagacagtgtctctgtatttgaaagctaaccctgaggagctggtggtctttgaggatttgaatgtatttcactgccaggaagaatgtgtgagcttg…
Q09FC8	ZNF415	JG-ZNF-82	1	No					-	atgtgggagcacaggaaagagccctggaccatagaaagccaagtacgagtagcaagaaaaccaaaagggtgggaatggatcaaaggtgtgaaaacagatctgtctcgtaactgtgtaatcaaggaactagcaccacaacaggaaggtaacccaggagaagtattccacacagtgacattggaacaacatgaaaaacatgacattgaagagttttgcttcagggaaatcaagaaaaaaatacacgactttgactgtcagtggagagatgatgaaagaaattgcaacaaagtgactacggccccaaaagaaaatcttacttgtaggagagaccaacgcgatagaagaggtataggaaacaagtctattaaacatcagcttggattaagctttctaccacat…
Q8NBF1	GLIS1	JG-ZNF-6	1	Yes	1	mRNA V2	0.694554	174.228	-	atggcagaggcccgcacatccctgtctgcccactgtcggggcccgctggccactggcctgcacccagacctggacctcccgggccgaagcctcgccacccctgcgccttcctgctaccttctgggcagcgaacccagctctggcctgggcctccagcccgagacccacctccccgagggcagcctgaagcggtgctgcgtcttgggcctaccccccacctccccagcctcctcctcaccctgtgcctcctccgacgtcacctccatcatccgctcctcccagacgtctctggtcacctgtgtaaatggactccggagcccccctctgacgggagatctggggggcccttccaagcgggcccggcctggccctgcatcgacggacagccatgagggcagc…
Q06889	EGR3	JG-ZNF-3	1	Yes	1	mRNA V2	0.840435	145.742	-	atgaccggcaaactcgccgagaagctgccggtgaccatgagcagtttgctaaaccaactgcctgacaatctgtaccccgaggagatccccagcgcgctcaacctcttctccggcagcagcgactcggtagtccattacaatcagatggctacagagaatgtaatggacatcggtctgaccaacgagaagcccaacccggaactctcttactccggctccttccagccagcccccggcaacaagaccgtgacctacttgggaaagttcgccttcgactccccttccaactggtgccaggacaacatcattagcctcatgagcgccggcatcttgggggtgcccccggcttcaggggcgctcagcacgcagacgtccacggccagcatggtgcagccaccg…
P11161	EGR2	JG-ZNF-2	2	Yes	1	mRNA V2	0.548591	64.0828	-	atgatgaccgccaaggccgtagacaaaatcccagtaactctcagtggttttgtgcaccagctgtctgacaacatctacccggtggaggacctcgccgccacgtcggtgaccatctttcccaatgccgaactgggaggcccctttgaccagatgaacggagtggccggagatggcatgatcaacattgacatgactggagagaagaggtcgttggatctcccatatcccagcagctttgctcccgtctctgcacctagaaaccagaccttcacttacatgggcaagttctccattgaccctcagtaccctggtgccagctgctacccagaaggcataatcaatattgtgagtgcaggcatcttgcaaggggtcacttccccagcttcaaccacagcctca…
Q8TA94	ZNF563	JG-ZNF-99	1	Yes					KRAB	atggacgcagtggcctttgaggatgtggctgtgaacttcacccaggaggaatgggctttgctgggtccatcacagaagaatttatacagatatgtgatgcaagaaaccatcaggaacctggactgtataagaatgatatgggaagaacagaatactgaagatcagtacaaaaatcctaggagaaatctaagatgtcatatggtagagagattcagtgaaagtaaagacagtagtcagtgtggagaaacatttagcctcattcgagatagtattgtgaacaacagcatttgtcctggagaagatccatgtcaaagcgctgagtgtgaagaagtcataatgggtcatttatcccttaatagccacatcagagttgattctggacacaaaccacatgagtat…
Q9GZX5	ZNF350	JG-ZNF-75	2	Yes	1	mRNA V2	1.66135	126.345	KRAB	atgatccaggcccaggaatccataacactggaggatgtggctgtggacttcacttgggaggagtggcaactcctgggcgctgctcagaaggacctgtaccgggacgtgatgttggagaactacagcaacctggtggcagtggggtatcaagccagcaaaccggatgcactcttcaagttggaacaaggagaacaactgtggacaattgaagatggaatccacagtggagcctgttcagacatatggaaagttgatcatgtgctggagcgcttgcagagtgaaagcctggtgaacagaaggaaaccatgtcatgaacatgatgcatttgaaaatattgttcattgcagcaaaagtcagtttctgttagggcaaaatcatgatatatttgacttacgtgga…
Q9BYN7	ZNF341	JG-ZNF-73	1	Yes					-	atggcgcaggcgatctttgaggccctggagggaatggacaatcagaccgttctggctgtccagtcattattggatggccaaggagcagtccctgatccgacaggccagagtgtcaatgcgccccctgctatccagccattggatgacgaggatgtatttctctgcgggaagtgtaagaagcaattcaactcgctgccagcgtttatgacccacaagcgggaacagtgccaggggaatgcccccgccctggccacagtctcactggccaccaacagcatctacccaccttcggcagcacccacagcggtccagcaggccccaactcctgccaatcgccagatctccacatacatcacagtgcccccgtccccactgatccagaccctggtgcaggggaac…
Q9NPC7	MYNN	JG-ZNF-16	1	Yes	2	both	3.27159	133.399	BTB	atgcagtattcgcaccactgtgagcaccttttagagagactgaacaaacagcgggaagcaggttttctctgtgactgtaccatagtgattggggaattccagtttaaagctcataggaatgtgctggcctcctttagtgagtattttggtgcgatctacagaagcacttctgagaacaatgtctttcttgatcagagtcaggtgaaggctgatggatttcagaaactgttggagtttatatacacaggaactttaaatcttgacagttggaatgttaaagaaattcatcaggctgctgactatctcaaagtggaagaggtggtcactaaatgcaaaataaagatggaagattttgcttttattgctaatccttcttctacagagatatctagtattact…
P17098	ZNF8	JG-ZNF-122	1	Yes					KRAB	atggaccccgaggacgaaggggtagcgggagtgatgtctgtggggccgccggcggcccggcttcaggaaccagtgaccttccgggatgtggctgtggactttacccaggaggaatgggggcagctggaccctacccagaggatcctctaccgtgacgtgatgctggagacctttggtcacctgctctccataggtcctgagcttccgaagcctgaagtcatctcccagctggagcaagggaccgagctatgggtggctgagagaggaaccacccagggctgccatccagcctgggagcctcgatctgaaagccaagcatcacgcaaggaagagggcctgcctgaagaggagccatcccatgtcacgggaagggaaggattcccgacagatgctccttat…
Q02086	SP2	JG-ZNF-25	1	Yes	1	mRNA V2	8.67689	104.186	-	atggctgccactgctgctgtgagtcccagtgactacctgcagcctgccgcctccaccacccaggactcccagccatctcccttagccctgcttgctgcaacatgtagcaaaattggccctccagcagttgaagctgctgtgacacctcctgctcccccacagcccacaccgcggaaacttgtccctatcaaacctgcccctctccctctcagccccggcaagaatagctttggaatcttgtcctccaaaggaaatatacttcagattcaggggtcacaactgagcgcctcctatcctggagggcagctggtgttcgctatccagaatcccaccatgatcaacaaagggacccgatcaaatgccaatatccagtaccaggcggtccctcagattcaggca…
P17020	ZNF16	JG-ZNF-46	2	Yes	1	mRNA V2	1.46683	93.9239	-	atggagctctcagttccaggaccatccccctggacccctgcagcccaggcccgtgtgagagatgctcctgctgtgacccaccctggatctgcagcctgtggtaccccctgctgtagtgatactgagctggaagccatctgccctcactatcagcagccagattgtgacaccaggactgaagacaaggagtttcttcacaaggaagacattcatgaagatttggaatcacaggcagaaatatcagaaaactatgctggtgatgtttcccaggtacccgagcttggagatctgtgtgatgatgtatcagaaagagactggggagtccccgaaggcaggaggctgccacagtccctctcccaggagggggacttcacaccagctgccatggggctccttagg…
A0PJY2	FEZF1	JG-ZNF-4	1	Yes	1	mRNA V2	0.917612	60.9969	-	atggacagtagctgccacaacgcgactaccaaaatgttagcgactgctccagctcggggcaacatgatgagcacgtccaaacccttggctttctccattgaacgaatcatggcgcgcaccccagagcccaaggccctgccagtcccccacttcctgcagggagccttacccaagggggaacccaagcactctctgcatctcaactcgtcgatcccctgcatgatccccttcgtgcctgtggcctacgacacgagccccaaggcaggagtgacgggctccgagccgcggaaggccagtctggaggccccggcggcgcccgcggcggtgccctcggctcccgcattcagctgcagcgacctgctcaactgcgcactgagtctcaagggcgacctggcccgc…
Q96NG8	ZNF582	JG-ZNF-101	2	Yes	2	both	2.01385	333.253	KRAB	atgtcccttgggtcagaattgttcagggatgtggccatagtcttctcccaagaagaatggcagtggttggcacctgctcagagggatttgtacagagacgtgatgttggagacctacagcaacctggtctcactgggtcttgccgtttccaaacctgatgtgatctccttcctagagcaaggcaaagagccctggatggtggagagagtggtgtctggaggcctgtgtccagtattggagtccagatatgataccaaggaattatttccaaagcagcatgtttatgaagtcgaatcaccccaatgggagataatggaaagccttacaagttatggtcttgagtgttcaagtttccaagatgattgggaatgcagaaaccagtttgacagacaacaggga…
Q9HBE1	PATZ1	JG-ZNF-19	1	Yes					BTB	atggagcgggtgaacgacgcttcgtgcggcccgtctggctgctacacataccaggtgagcagacacagcacggagatgctgcacaacctgaaccagcagcgcaaaaacggcgggcgcttctgcgacgtgctcttgcgggtaggcgacgagagcttcccagcgcaccgcgccgtgctggccgcctgcagcgagtactttgagtcggtgttcagcgcccagttgggcgacggcggagctgcggacgggggtccggctgatgtagggggcgcgacggcagcaccaggcggcggggccgggggcagccgggagctggagatgcacactatcagctccaaggtatttggggacattctggacttcgcctacacttcccgcatcgtggtgcgcttggagagcttt…
O14771	ZNF213	JG-ZNF-52	1	Yes	1	mRNA V2	2.41722	96.1626	SCAN,KRAB	atggcagcccccttggaggcccaggaccaggcccctggggagggagaagggcttctgattgtgaaagtggaagattcctcctgggaacaggaatctgcccagcatgaggatggcagggattccgaagcctgccgccagcgcttccggcaattctgctacggggatgtgcatgggcctcatgaggccttcagccagctctgggagctctgctgccgctggctgcggcccgagctgcgtaccaaggagcagatcctggagctgctggtgctggagcagttcctgacagtgctgccaggggagatccagggctgggtgcgtgagcagcacccgggaagcggtgaggaggctgtcgccttggtggaggacctacagaagcagccagtgaaagcctggcgacag…
Q96JF6	ZNF594	JG-ZNF-103	1	Yes					-	atgaaggaatggaaatcaaagatggaaatttctgaagaaaagaagtcagcaagggctgcatccgaaaaactccaaagacaaatcacccaggaatgtgagttagttgaaaccagtaattctgaggacagattattgaagcactgggtaagccctttaaaggatgcaatgagacatctcccttcccaagagagcggtatcagggaaatgcatattatcccccagaaagccattgtgggagagattggccatggatgtaatgaaggagaaaaaatactttctgcaggagaaagctcccatagatatgaggttagtggccaaaacttcaaacagaagtcaggattaactgaacatcagaaaattcataatataaataagacctatgaatgtaaggaatgtgaa…
Q8TF68	ZNF384	JG-ZNF-79	1	No					-	atggaagaatctcacttcaattctaacccgtacttctggccttctatccccacagtctcaggtcagatcgagaacacaatgttcatcaacaagatgaaggatcagctgttgccagagaagggctgtggtctggccccacctcactaccccaccttgctgacagtgcctgcctcagtgtccctgccctcaggcatcagtatggacacagagtccaagtcagaccagctgaccccacacagccaagcgtccgttacccagaatatcacggtggtccctgtgccgtctacaggactgatgactgctggagtctcctgttctcagaggtggagaagagaagggagtcaatcaaggggtccgggtttggtaatcacgtccccctcaggctctcttgtgaccaca…
Q9NPA5	ZFP64	JG-ZNF-38	3	Yes	1	mRNA V2	4.72352	87.2873	-	atgaacgcgagcagcgagggcgagagcttcgcgggctcggtgcaaattccaggtggcacaacggtgctggtggagctgactcccgacatccatatctgcggcatctgcaagcagcagtttaacaacctggatgcctttgtagctcacaagcaaagtggctgccagctgacaggcacatccgcagcagcccccagcacggtccagtttgtatcggaggaaacagtgcctgccacccagactcagaccaccaccagaaccatcacctcggagacccagacaatcacagtttcagctccagaatttgtttttgaacatggctatcaaacttacctgcccacggaaagtaatgaaaaccagacagccactgtcatctctctccctgccaagtcacgcaccaaa…
P17039	ZNF30	JG-ZNF-64	3	Yes					KRAB	atggcccataaatatgtgggtttgcagtatcacggatcagtgacatttgaggatgtggccatagccttctcccagcaggagtgggagagtctggactcttcccagaggggcttgtacagagatgtgatgttggagaactacaggaacttggtgtcaatggcaggacattcccgttctaaaccacatgtgatcgccttattggaacaatggaaagagcctgaagtgacagtgaggaaagatggaagaagatggtgcacagatttgcagttggaagatgatacaatcggctgtaaagaaatgcccacctctgaaaactgtccatcttttgctctacatcagaaaataagtagacagaaaccacgtgaatgtcaggaatatggaaagaccctttgtcaagac…
Q86UD4	ZNF329	JG-ZNF-69	1	Yes	1	mRNA V2	3.85296	39.1801	-	atgagattgaaaatgacgactcggaattttcctgagagagaagtaccctgtgatgtagaagtggaaagattcacaagggaagttccctgcttgtccagtttaggtgatggttgggactgtgagaaccaggagggacacttgaggcaatcagctttaactctggagaaaccagggactcaggaagcaatttgtgaatatcctggttttggggagcatttgattgcaagctcagaccttccaccgtctcagagagttctggcaacaaatggtttccatgcacctgactcaaatgttagtggtctggattgtgaccccgccttacccagctatcctaaaagttatgcagataagagaactggtgacaatgatgcctgtggaaaaggcttcaaccattccatg…
O75467	ZNF324	JG-ZNF-68	1	Yes	1	mRNA V2	3.52995	117.817	KRAB	atggcctttgaggatgtggctgtgtacttctcccaggaggagtgggggctcctggacacagcccagagggccctgtaccgccgcgtgatgctagacaacttcgcacttgtggcctcgctgggactctccacctctcgacctcgtgtggtcatccaactggagcgtggcgaggagccctgggttcccagtggaacggacacaaccctgtccaggaccacctacaggaggcgcaaccctggttcctggagtttgacagaggatagagatgtttctggagaatggccacgagctttcccagataccccacctgggatgactactagcgtcttccctgttgccggtgcctgccacagtgtaaaaagcctgcagagacaacggggtgcctccccatctcgggag…
Q5T5D7	ZNF684	JG-ZNF-112	1	Yes	1	mRNA V2	1.97799	43.2871	KRAB	atgaaaaaaatcatacaaggaaaaaaaccttttgaatgcaatgactgtggaaaagcctatagcaggaaggcacaccttgcaactcatcagaaaattcataatggagagagaccctttgtgtgcaatgattgtgggaaggcgtttatgcataaagcccaactcgtggtccaccagagacttcacactggagagaagccttatgagtgcagtcaatgtgggaaaacattcacttggaactcctcatttaatcaacacgtgaaatctcatacacttgagaagtcatttgaatgtaaggaatgtgggaaaaccttcaggtatagttcatccctttataaacattccagatttcatacaggagagaaaccctaccagtgtatcatatgtggcaaagcttttggc…
Q8IWY8	ZSCAN29	JG-ZNF-128	1	No					SCAN	atgatggccaaatcagctctaagagagaatggcactaactctgagaccttccgacagcgtttcaggagattccattaccaggaggtggctgggccgcgggaggctttcagccaactctgggaactttgctgtcggtggctaaggccggaggtgcgcaccaaggagcagattgtagaactgttggtgctagagcagttcctgaccgtcttacctggggagatccagaattgggtacaggaacaatgtccagaaaatggagaggaggcagtgactctcgtggaagatttagaaagagagcctggaagacctagatcttcggtcacagtctctgtgaaggggcaggaagtgcgcttggagaagatgacacccccgaaatcatcacaagagttattaagtgtt…
Q8TF45	ZNF418	JG-ZNF-83	1	Yes	1	mRNA V2	0.319445	111.759	KRAB	atgcagggcactgtggcatttgaagatgtggctgtgaacttttcccaggaggagtggagtctccttagtgaggttcagagatgcctttaccatgacgtgatgctggagaactgggtacttatatcctccctgggttgttggtgtggatcagaagatgaggaggcaccttctaagaagagcatttctatacaaagagtgtctcaggtcagcactcctggggcaggtgtgtctcccaagaaggcccactcttgtgaaatgtgtggcgcgatcttgggagacattttgcacttggcagatcatcaggggacacatcacaagcagaaactgcacaggtgtgaggcatgggggaataaattgtatgatagttcaaaccgtccgcaccagaatcagtaccttgga…
P08047	SP1	JG-ZNF-24	1	No	1	mRNA V2	25.297	322.036	-	atgagcgaccaagatcactccatggatgaaatgacagctgtggtgaaaattgaaaaaggagttggtggcaataatgggggcaatggtaatggtggtggtgccttttcacaggctcgaagtagcagcacaggcagtagcagcagcactggaggaggagggcaggagtcccagccatcccctttggctctgctggcagcaacttgcagcagaattgagtcacccaatgagaacagcaacaactcccagggcccgagtcagtcagggggaacaggtgagcttgacctcacagccacacaactttcacagggtgccaatggctggcagatcatctcttcctcctctggggctacccctacctcaaaggaacagagtggcagcagtaccaatggcagcaatggc…
A6NK75	ZNF98	JG-ZNF-125	1	Yes					KRAB	atgttagagaactacagaaacctggtcttcgtgggtattgctgcctctaagccagacctgatcacctgtctggagcaaggaaaagaaccttggaatgtgaagagacatgagatggtaactgaacccccagttgtatattcttattttgcccaagacctttggccaaagcagggcaaaaaaaattatttccaaaaagtgatactgagaacatataaaaaatgtggacgtgaaaatttacagttaagaaaatactgtaaaagcatggatgagtgtaaggtgcacaaagaatgttacaatggacttaaccagtgtttgacaactacccagaacaaaatatttcaatatgacaaatatgtgaaagtctttcataaattttcaaattcaaacagacataagata…
P13682	ZNF35	JG-ZNF-74	2	Yes					-	atgactgcagaattgagagaagccatggccctagccccatggggcccagtgaaggtgaaaaaggaggaggaagaagaagaaaacttcccaggtcaggcatccagccaacaagtgcactccgagaacatcaaagtctgggccccagtgcagggtcttcagacaggccttgatggatcagaagaggaagaaaagggtcagaacatatcctgggatatggcggtagtcctgaaagcaactcaggaggcacctgctgcttcaacccttggcagctactcattaccagggactctggccaagagtgagatactggagactcatgggaccatgaactttctaggtgctgaaaccaagaacctacagttactggttccaaaaactgagatatgtgaggaagctgaa…
Q8TBZ5	ZNF502	JG-ZNF-91	2	Yes	2	both	1.62616	67.4801	-	atgttgaatatgcaaggagctgaagagagagacattagaagagagacttgtccaggctgggtaaacaagaacaagcctgctctggagcaggatgtctgtaaaattgactcatcagggatagtagtaaagaggttccaagaggatgaataccaagattctacatttgaagaaaaatatgcatgtgagggcatgaaggaaaactctcctagggagattgctgaatcatgccttttccaggaaggaggttttgggagaataactttcatccacaaagaagcaccccctgaaattattagtcaaggatataattttgagaaaagcttgcttttgacctcaagccttgttacacgtctcagggtttctacagaagagagtctgcatcagtgggaaacaagtaat…
Q15072	ZNF146	JG-ZNF-45	1	Yes					-	atgtcacacctcagccagcagaaaatttacagtggggaaaacccctttgcctgtaaggtatgtggaaaagtcttcagccacaaatcaaacctcactgagcatgagcattttcacacgagagagaaaccttttgaatgtaacgagtgtggaaaagcctttagccaaaagcagtatgtcattaaacatcagaacacccatactggcgagaagcttttcgaatgtaatgaatgtggaaaatcatttagccagaaggaaaacctccttacgcaccagaaaattcacactggagaaaaaccttttgagtgtaaagattgcgggaaagctttcattcagaagtcaaacctcatcagacaccagagaactcacacaggagagaagccctttgtatgtaaggagtgt…
Q96BR6	ZNF669	JG-ZNF-108	2	Yes	3	both	1.94309	163.694	KRAB	atggtgagtggactgcgcctggcttcccgaagtggagaagagggctggttgaaacctgctgtggcgcgactcgggcctccacgccatcggctccggaacctgcggaccgagtcgccgtggcgtagccggggctcagtcctcttctgttcagggccgggccgggcggggcgggcagcggaacccctgcatcctgtctgtacctgcgggcgccacttccgccggccggatccctgtcgggaacccctcgcctcccctatccaggactcggtggcttttgaggatgtggctgtgaactttacccaggaggaatgggctttgctagattcttctcagaagaatctctacagagaagtgatgcaggaaacctgcaggaacctggcttctgtaggaagccaatgg…
Q3ZCT1	ZNF260	JG-ZNF-58	1	No					-	atgataggcatgttggaaagtcttcagcatgaatcagatctccttcagcatgatcaaattcatactggagagaaaccttatgaatgtaatgaatgtagaaaaacttttagcctgaagcaaaaccttgtagagcataagaaaatgcatactggagagaaatctcatgaatgcactgaatgtggtaaagtgtgctctcgagtctcatctcttactctacaccttagaagtcacacaggaaagaaggcatataaatgtaataaatgtggaaaagccttcagccagaaggaaaacttcctttctcatcagaaacatcacactggagagaaaccttatgaatgtgaaaaagtttctattcagatgccaaccatcatcagacaccagaaaaatcatacaggaacc…
Q5HYK9	ZNF667	JG-ZNF-107	1	Yes	1	mRNA V2	1.29563	75.2715	KRAB	atgagaattcatgatggaaaggaaattcttgactgtgggaaggccttgagtcaatgtcagtctttcaatatacatcagaaaattcatgttgttgggaatgtctgccagtgcagaaagtgcggaaaagccttcaatcagatgtcatcccttttacttcataagaaaattcacaatggaaagaaaacacataaatataataaatgtgggagaggcttcaaaaagaaatcagtctttgttgtacataaaagaattcatgctggagagaaaatccctgaaaatgcgaaggccttaagtcagagtctacagcaaagaagtcaccatttagagaatccttttaaatgcagaaaatgtgggaaattatttaataggatttcacccctgatgcttcaccagagaatt…
Q86XU0	ZNF677	JG-ZNF-110	1	Yes	3	both	0.733983	18.9968	KRAB	atggctctttctcagggactgtttacattcaaggatgtggccatagaattctctcaagaggagtgggagtgcctggaccctgcccagagggccttgtacagggacgtgatgttggagaactacaggaacctgctttctctcgatgaggataacatccctccagaagatgatatttctgttggatttacaagcaagggattatcaccaaaggaaaataataaagaggaattataccatctggtgatattagaaagaaaggaaagccatggcatcaacaattttgacctcaaggaagtctgggaaaatatgcctaagtttgacagcctgtgggactatgatgtaaaaaattacaaaggaatgcctttgacctgtaacaaaaatctcactcacagaaaagat…
Q8TC21	ZNF596	JG-ZNF-105	2	Yes	1	stranded total RNA	0.522406	19.9849	KRAB	atgaccttcgaggatatcattgtagacttcactcaagaagagtgggccctgctggacacatcccagagaaagctgtttcaagatgtgatgttggagaacatcagtcatctggtctctattggcaaacagctctgcaaatcagttgtgctttcccaattggagcaagtagagaaactttcaacacaaagaataagcttactgcaaggtagagaagttggcattaaacatcaagagataccattcattcatcatatctatcagaagggcacgtccaccatcagcacaatgagatctcatactcaagaggatccttttctatgcaatgacttaggagaagatttcactcaacatatagcattgactcaaaatgtgattacctacatgagaacgaaacacttt…
Q96MU6	ZNF778	JG-ZNF-120	1	Yes	1	mRNA V2	1.59575	95.7726	KRAB	atgctggaaaactacgagaacctggcctcagtaggacatcacctgttccaacccagtgtgatctattggctggagcaggaagaggagttgagggcagggcggagagcagttctccaagaatggcgacttaaaaccaaagggccagcacttcggcaggatagatcttggttcagagcatcaaatgagacacagacggcaagaagccacaatggagggcagctctgtgaccgcacgcagtgtggagaagctttcagtgaacactcaggcctcagcacacacgtgagaactcaaaatacaggagacagttgtgtgtctaatcattatgaaagggacttttttattccatgccagaaaaccttgttcaaaattggagagcagttttccgtgttgggtcagtgt…
O43829	ZBTB14	JG-ZNF-29	1	Yes					BTB	atggagtttttcatcagtatgtctgaaaccattaaatataatgacgatgatcataaaactctgtttctgaaaacactaaatgaacaacgcctggaaggagaattttgtgatattgctattgtggttgaggatgtgaaattcagagcacacagatgtgttcttgctgcctgcagcacctactttaaaaagcttttcaagaagcttgaggttgatagttcttcggtcatagaaatagattttcttcgttctgatatatttgaagaggtcctgaactacatgtacacagcaaagatttccgtgaaaaaagaagatgttaacttaatgatgtcatcgggtcagattcttggtatccgatttttggataaactgtgttctcagaagcgtgatgtgtccagtccc…
Q9UKT9	IKZF3	JG-ZNF-8	1	Yes					-	atggaagatatacaaacaaatgcggaactgaaaagcactcaggagcagtctgtgcccgcagaaagtgcagcggttttgaatgactacagtttaaccaaatctcatgaaatggaaaatgtggacagtggagaaggcccagccaatgaagatgaagacataggagatgattcaatgaaagtgaaagatgaatacagtgaaagagatgagaatgttttaaagtcagaacccatgggaaatgcagaagagcctgaaatcccttacagctattcaagagaatataatgaatatgaaaacattaagttggagagacatgttgtctcattcgatagtagcaggccaaccagtggaaagatgaactgcgatgtgtgtggattatcctgcatcagcttcaatgtctta…
Q9HCK0	ZBTB26	JG-ZNF-31	2	Yes					BTB	atgtctgaaagatcagatctccttcacttcaagtttgaaaattatggagattcaatgttacaaaaaatgaacaaattaagagaagagaataaattttgtgatgttacagttctcatagatgatattgaggtacagggacataaaattgtgtttgctgcaggttcccccttcttaagagaccaatttttactgaatgattccagagaggtgaaaatctccatattacagagttccgaagtggggagacaattgctcttatcctgttatagtggtgtgctggaattccctgagatggaactggtaaattacttgactgctgcaagttttcttcagatgagccacattgtagaacggtgcacacaggccctgtggaagtttataaagccaaaacaaccaatg…
Q9UL59	ZNF214	JG-ZNF-53	1	Yes	1	mRNA V2	1.09907	241.715	KRAB	atggcagtaacatttgaagatgtgactattatttttacatgggaggagtggaaattcctggattcttctcaaaaaagactctacagggaggtcatgtgggagaactacacaaatgtcatgtcagtagaaaactggaatgagagctacaaatcccaagaagaaaaattcagatacttagaatatgaaaatttttcctactggcaaggctggtggaatgctggcgcccagatgtatgagaatcagaactatggggaaactgttcaagggacagattccaaagacctcacacagcaagatcgttcccagtgtcaggaatggttaatactctccacacaagtaccagggtatgggaactatgaactgacttttgaaagcaaaagtctcaggaacttaaaatat…
P17032	ZNF37A	JG-ZNF-77	1	Yes					KRAB	atgatcacatcccagggatcagtgtcgtttagggatgtgactgtgggcttcactcaagaggagtggcagcatctggaccctgctcagaggaccctgtacagggatgtgatgctggagaactacagccaccttgtctcagtagggtattgcattcctaaaccagaagtgattctcaagttggagaaaggcgaggagccatggatattagaggaaaaatttccaagccagagtcatctggaattaattaataccagtagaaactattcaataatgaagttcaatgagtttaacaaaggtggaaaatgtttctgtgatgaaaagcatgaaataattcattctgaagaggaaccttctgaatataataaaaatgggaacagcttctggctgaatgaagacctc…
P17026	ZNF22	JG-ZNF-54	5	Yes					-	atgaggttagcaaagcctaaagcgggtatttctcggagctcaagccaaggaaaggcctatgagaacaagcgcaaaacaggccggcagcggcagaagtggggcatgactattcgatttgactcaagcttcagtagactcagaagaagcttggatgacaaaccctataaatgtactgaatgtgaaaagagtttcagtcagagttcaactctttttcaacaccagaagatccatactggaaagaaatcccataaatgtgctgattgtgggaaaagtttctttcagagttctaatctcattcagcatcgacggatccatacgggggaaaagccctacaaatgtgatgagtgtggagaaagcttcaaacagagctcaaatctcattcagcaccagagaattcat…
Q6NX45	ZNF774	JG-ZNF-119	1	No					KRAB	atgtggctggggacttcagggaagagtgggttacctggacactgcttagagaatcctctccaggaatgccacccagcacagttagaagaatgggctctcaaaggaatttccaggcctagtgtaatctcccagccggagcagaaagaagagccatgggtcctaccactccaaaactttgaggcgaggaagatcccgagggaaagccacacagactgtgagcatcaggtggcaaagctcaatcaggacagttctgaaacagcagaacaatgtggaacatcctcagaaaggaccaataaagatctttctcatactcttagttggggaggaaactgggagcaaggcctagaattagaagggcaacatggaacccttccaggagagggccagctggagtccttt…
Q8IZ26	ZNF34	JG-ZNF-72	1	Yes					KRAB	atggcggccttgttcctgtctgccccaccccaggccgaggtgaccttcgaggacgtggctgtgtacctctcccgggaggaatggggccgcctgggccctgctcagaggggcctctacagggacgtgatgctggagacctacgggaacctagtctcactgggagtaggacctgcaggccccaagcctggagtgatctcgcagttggagcgaggggatgagccctgggtcctggatgttcagggcacctctgggaaagagcacctgagagtcaacagcccagctcttgggaccagaactgagtacaaggagttgacttcacaggagacatttggtgaggaagatccccagggatctgagccagtagaagcctgtgaccacatcagtaagtcagaggggagc…
Q86W11	ZSCAN30	JG-ZNF-129	1	Yes					SCAN	atgtcaggagaggccacagtcttggcctaccatgctccagaagaacaggaaggacttctagttgtcaaggttgaagaagaaaattatgttttggaccaggactttggccttcaggaaaacccctggagccaagaggtattccggcagaagttcaggcagtttagttactctgactccactggccctcgggaggctctgagccggctgcgagagctttgctgtcagtggttgaggccggaggtgcactccaaggagcagatcctggagctgctgatgttggagcagttcctggccatccttcctgaggagctgcaagcttggctgcgagagcatcggccagagaatggagaggaagctgtgactatgctggaggagctggaaaaagaactggaggagcca…
Q8NCA9	ZNF784	JG-ZNF-121	1	Yes	1	mRNA V2	2.56016	512.672	-	atggccgctgcgcgcccagaggcccagagtcggagctcaccgactccggagtcgcgatcccaggagccactggacctggtcctggtgcctgatgactgccggcctggcacacccccgagtgacctcatcgagatccaggtggtgaaggtgacggacaccacgctggtccctgagcccccggagccaggttctttccactgtgccttgtgccctgctgccttccggctggtttccgagctgctgttccacgaacatggccacttggctggggccgagggaggcgggcagggtggggacccgagccggtgccacgtgtgcggccacagctgcccgggccccgccagcctgcgcgcgcactacagcttgcacacgggggagcggccctaccgctgcgcgctc…
Q08ER8	ZNF543	JG-ZNF-95	1	No	1	mRNA V2	2.85455	228.469	KRAB	atggcagcctcggcgcaggtgtctgtgacctttgaggatgtggctgtgacattcacccaggaggagtggggacagttggatgcagcccagagaaccttgtatcaggaggtgatgctggagacctgcggacttctcatgtctctgggctgtcctttgttcaaaccagagctgatctaccagttggatcacagacaggagctatggatggctacaaaagacctctcccaaagctcctatccaggtgacaacacaaaacccaagaccacagagcctaccttttctcacctggccttgcctgaggaagtcttactccaggaacaactgacacaaggagcctcaaagaactcccaattagggcaatccaaggatcaggatgggccatctgaaatgcaagaagtc…
P15622	ZNF250	JG-ZNF-56	2	Yes	1	mRNA V2	1.11092	46.6675	KRAB	atgatggaaacctatgggaatgtagtctcattgggacttccaggatccaagcctgacataatctcccagctggagcgaggggaagatccctgggtcctggacaggaagggggctaagaagagccagggcctgtggagtgactactcagacaacctcaaatatgaccacactacagcctgtacacaacaagacagtttatcttgtccatgggaatgtgaaaccaagggagagagtcaaaatacagacttgagtccgaagccattaatttcagagcaaacagtgattctggggaaaacacccttggggaggattgatcaagaaaataatgaaacaaagcaaagcttctgtctgagtccaaactctgttgaccaccgtgaagttcaggtcttaagccaaagc…
Q9NQX0	PRDM6	JG-ZNF-21	1	No					SET	atgctgaagcccggagaccccggcggttcggccttcctcaaagtggacccagcctacctgcagcactggcagcaactcttccctcacggaggcgcaggcccgctcaagggcagcggcgccgcgggtctcctgagcgcgccgcagcctcttcagccgccgccgccgcccccgcccccggagcgcgctgagcctccgccggacagcctgcgcccgcggcccgcctctctctcctccgcctcgtccacgccggcttcctcttccacctccgcctcctccgcctcctcctgcgctgctgcggccgctgccgccgcgctggctggtctctcggccctgccggtgtcgcagctgccggtgttcgcgcctctagccgccgctgccgtcgccgccgagccgctgccc…
Q9NXT0	ZNF586	JG-ZNF-102	1	No					KRAB	atggcggcagcagccgctctgagggcgcctgctcaggttgttggcatggaggggaagatgaggcagcaccttctaagcagagcacgtgtatacatatatacaaagaccagggaggtcatagtggagaaaggccttatgagtgtggggaatataggaaattatttaagaacaagtcctgcctcactgaacccagaagagatcacaaacacaggaatgttcgcactggagaaaggccttatgagtgcagcaaatatgggaaattatttcaccaaaagcctacactccatattcatgagagatttcatactgggcaaaagacctatgagtgcagtgagtgtggaaaatcatttcaccaaagctcttcactcttgcagcgtcagacacttcacactagagaaa…
P52737	ZNF136	JG-ZNF-43	2	Yes					KRAB	atgtacgccatgaagtacatgaacaagcagcagtgcatcgagcgcgacgaggtccgcaacgtcttccgggagctggagatcctgcaggagatcgagcacgtcttcctggtgaacctctggtactccttccaggacgaggaggacatgttcatggtcgtggacctgctactgggcggggacctgcgctaccacctgcagcagaacgtgcagttctccgaggacacggtgaggctgtacatctgcgagatggcactggctctggactacctgcgcggccagcacatcatccacagagatgtcaagcctgacaacattctcctggatgagagaggacatgcacacctgaccgacttcaacattgccaccatcatcaaggacggggagcgggcgacggcatta…
Q6P9A3	ZNF549	JG-ZNF-97	1	Yes					KRAB	atggccgaggcagcgctagtgaatacgccgcagattcccatggtaacagaagagtttgtgaaaccatcacagggccatgtgacctttgaggatattgctgtgtacttctcccaggaggagtggggcctccttgatgaagctcaaaggtgcctgtatcatgatgtgatgctggagaacttttcgcttatggcctcagtaggttgtttgcatggaatagaggctgaggaggccccttctgagcagactctttctgcgcaaggagtgtcacaggccaggactccaaagctaggtccttccatcccaaatgctcattcttgtgagatgtgtatcctggtcatgaaagacattttgtacctcagtgagcatcaggggacacttccctggcagaaaccttatacg…
Q96C55	ZNF524	JG-ZNF-93	1	Yes					-	atggacacccccagcccagacccgttgccttcgcctttgcccggggaggaagagaaacctctggccttatctcctcctgttccccggggccgccgaggccgtcgtcctgggggagccacctcctcaaatcggacactcaaggcctccctccctcgcaagcggggccgcccccccaagtcagggcaggagcccccactggtgcaggtgcagggggtgacagccccagtaggcagcagtggcgggagcgacctcctcctgatcgatgatcagggtgtgccctatacggtctctgaaggttcagcggctgggcctgagggctctggccccaggaaggccccacacttctgcccggtgtgcctgcgggccttcccctacctctccgacctggagcgccacagc…
Q9H5H4	ZNF768	JG-ZNF-117	1	Yes	2	mRNA V2	28.993	536.282	-	atgaggagccccgaagggtacctcagaggcaacatgagtgagaatgaggaagaggaaatttctcagcaagaaggcagtggggactatgaagtcgaagagataccatttgggcttgaaccccagagccctgggtttgagccacaaagcccagagtttgaaccccaaagccccagatttgagcctgaaagcccggggtttgagtcccgaagccctgggcttgtgcccccaagccctgagtttgcacccagaagccctgaatcagattctcagagccctgagtttgaatcccagagccctaggtatgaaccccaaagccctggctatgaacctcggagccccgggtatgaaccccggagccctggctatgaatctgagagctctagatatgaatcccagaac…
Q8IVP9	ZNF547	JG-ZNF-96	1	Yes					KRAB	atggcagaaatgaaccctgcacagggtcatgtggtttttgaagacgtggccatatatttctcccaggaggagtgggggcatctcgatgaggctcagagattgctgtaccgtgatgtgatgctggagaatttggcccttttgtcctcactaggttgttgccatggagctgaggatgaggaggcacctttagagccaggtgtttctgtaggagtgtcacaggtcatggctccaaagccctgtctatctacccagaatacccagccctgtgagacatgtagctcacttctgaaggacattctgcgtctggctgagcatgacggaacacaccccgagcagggactgtacacgtgtccagcacatcttcaccagcaccaaaaggagcagattagagagaaactt…
Q14593	ZNF273	JG-ZNF-61	1	Yes	1	mRNA V2	1.20733	29.1836	KRAB	atgttagataactacagaaacctggtcttcctgggtattgctgtctctaagccagacctgatcacttgtctggagcaaggaaaagagccctgcaatatgaagagacatgcgatggtagccaaacccccagttgtgtgttctcattttgcccaagacctttggccaaagcagggcttaaaagattcttttcaaaaagtgatactgagaagatatggaaaatatggacatgagaatttacaattaagaaaaggctgtaaaagtgcggatgagcataaggtgcacaaaagaggttataatggacttaaccaatgtttgacaactacccagagcaaaatatttcaatgtgataaatatgttaaagtccttcataaattctcaaattcaaatatacataagaaa…
Q96LW9	ZSCAN31	JG-ZNF-130	2	Yes					SCAN	atggaacatttgggggatagcaaactccaaagagatgtatctttggattctaagtacagagaaacttgtaaacgagacagcaaggcagaaaagcagcaggcacattccactggagagagacgccacaggtgcaatgaatgtgggaaaagcttcactaagagttcagtactcattgagcaccagagaatccacactggggagaagccatatgaatgtgaagaatgtgggaaggccttcagccggaggtcaagcctgaatgaacatcggcggagccacactggagagaaaccctatcaatgtaaggagtgtgggaaagccttcagtgccagcaatggcctcactcgacacagaagaatccacacaggggaaaaaccatatgaatgcaaagtgtgtgggaag…
O60765	ZNF354A	JG-ZNF-76	1	Yes					KRAB	atggctgctgggcagcgggaagcgaggccccaggtgtcactgacgtttgaggatgtggctgtgctgtttacccgagatgagtggagaaagctggccccttctcagagaaacttgtaccgggatgtgatgctggagaactataggaacctggtctcactggggctcccatttaccaaaccaaaagtgatctccctgttgcagcaaggagaagatccctgggaggtggagaaagacggttctggcgtctcctctctaggatcgaagagcagtcataaaaccacaaagtcaacgcaaacacaagactcttcatttcagggactgatactgaaaagatccaacaggaatgtaccttgggatttgaaattagaaaagccttacatatatgaaggcagattagag…
Q8N141	ZFP82	JG-ZNF-39	1	Yes	2	both	4.98026	146.765	KRAB	atggcccttcgatcagtgatgttcagtgatgtatccatagacttctctccagaagagtgggaatacctggacttggaacaaaaggacttgtacagagatgtcatgttggagaactacagcaacttggtctcactgggatgcttcatttctaaaccagatgtgatttcctcattggagcaaggaaaagagccttggaaagttgtgaggaaaggaagaagacaatatccagatttggagaccaagtatgagaccaagaagttatctttagaaaatgacatttatgaaataaatttatcccagtggaagataatggaaagaattgaaaaccatggccttaagggtctcattttaaaaaatgattgggaatccacaggaaaaattgaaggacaggagagacct…
Q9NZL3	ZNF224	JG-ZNF-55	1	Yes	1	mRNA V2	2.29439	63.0663	KRAB	atgaccacgttcaaggaggcaatgaccttcaaggacgtggctgtggtcttcactgaggaagagctggggctgctggaccttgctcagaggaagctgtatcgagatgtgatgctggagaacttcaggaacctgctctcagtgggacatcaagcattccacagggatactttccacttcctaagggaagaaaagatttggatgatgaagacagcaatccaaagggaagggaattcaggagacaagatccaaactgagatggagactgtttcagaagcaggaacacatcaagagtggtccttccagcaaatctgggaaaaaattgcaagtgatttaaccaggtctcaagacttggtgataaatagctctcagttctccaaagaaggtgatttcccctgccag…
Q8N8E2	ZNF513	JG-ZNF-92	1	Yes	2	both	4.75401	196.309	-	atgccccgaaggaagcaaagccacccgcagcccgtgaaatgcgagggggtcaaagtggatactgaagactccctcgacgaaggacccggggccctggtattggagagtgatttgctactaggccaggatctggagtttgaggaggaagaggaagaggaggaaggcgacggcaacagtgaccagctcatgggcttcgagagagactcggaaggagactctctgggggccaggcctgggcttccctatgggctgagcgacgatgagtctgggggcggccgggcactaagtgcggagagtgaagttgaggagccagccaggggtccaggggaggccaggggtgagaggccaggcccagcctgccagctgtgtggggggccgacaggtgaggggccgtgttgt…
Q06730	ZNF33A	JG-ZNF-71	1	Yes	1	mRNA V2	7.72325	46.5846	KRAB	atgtttcaggtagaacagaagtcccaggagtcagtatcatttaaagatgtgactgtgggcttcacccaggaggagtggcagcacctggaccctagtcagagggctctgtatagagatgtgatgctggagaactacagcaaccttgtctcagtggggtattgtgttcacaaaccagaggtgatcttcaggctgcaacaaggagaagagccatggaaacaggaggaagaattcccaagccaaagctttccagaagtctggacagctgatcacctgaaagagaggagccaagaaaaccaatctaaacatttgtgggaagttgtattcatcaataatgaaatgctgactaaggaacaaggtgatgtaataggaataccatttaatgtggatgtaagttctttt…
Q9NQZ8	ZNF71	JG-ZNF-115	1	Yes					-	atgaaagagttggatccaaagaatgacatttcggaagacaagctctccgttgttggggaggccacggggggacccacgaggaatggtgccaggggtcctggctcagaaggagtgtgggaaccaggcagctggccagagaggccgcggggagatgcaggtgcagagtgggagccattgggaattccccaggggaacaaactcttagggggctcagtacccgcatgtcatgaactgaaggcatttgccaaccaaggctgtgtcctggtcccaccacggctggacgaccccacagaaaagggggcctgtccacccgtaaggcgtggcaagaacttctccagcacttcagacctcagtaagccccccatgccctgcgaggagaagaaaacctacgactgcagc…
Q02386	ZNF45	JG-ZNF-87	1	Yes					KRAB	atgacgaagtctaaggaggcagtgacattcaaggacgtggctgtggtcttctctgaggaggagctgcaactgctggaccttgcccagaggaagctgtaccgagatgtgatgctggagaacttcaggaatgtggtctcagtggggcatcagtccacaccagatggcctaccacagttagagagagaagaaaagctgtggatgatgaagatggcaacccagagagataactcctcaggagccaagaatctaaaagagatggagactcttcaagaagtaggattaaggtacctgcctcatgaagagcttttctgctcccagatctggcaacagattacaagagagttaatcaagtatcaagattctgtggtaaatattcaaagaacaggctgccagttggaa…
Q9Y473	ZNF175	JG-ZNF-47	1	Yes	1	mRNA V2	2.16763	39.1478	KRAB	atgcctgctgatgtgaatttatcccagaagcctcaggtcctgggtccagagaagcaggatggatcttgcgaggcatcagtgtcatttgaggacgtgaccgtggacttcagcagggaggagtggcagcaactggaccctgcccagagatgcctgtaccgggatgtgatgctggagctctatagccatctcttcgcagtggggtatcacattcccaacccagaggtcatcttcagaatgctaaaagaaaaggagccgcgtgtggaggaggctgaagtctcacatcagaggtgtcaagaaagggagtttgggcttgaaatcccacaaaaggagatttctaagaaagcttcatttcaaaaggatatggtaggtgagttcacaagagatggttcatggtgttcc…
Q8IYB9	ZNF595	JG-ZNF-104	1	Yes	1	mRNA V2	0.606842	13.2761	KRAB	atggaactcgtaacattcagggatgtggccatagaattctcccctgaagagtggaaatgtctggaccctgcccagcagaatttgtatagagatgtgatgttggagaactacaggaacctggtctccctgggttttgtgatctctaacccagacctggtcacctgtctggagcaaataaaagagccctgcaatttgaagatacatgagacagcagccaaacccccagctatatgttctcctttcagccaagacctttcaccagtgcaggggatagaagattcattccacaaacttatactgaaaagatacgagaaatgtggacatgagaatttacaattaagaaaaggttgtaaacgtgtgaatgagtgtaaggtgcagaaaggagttaataatggagtt…
Q92664	GTF3A	JG-ZNF-7	1	Yes					-	atggatccgccggccgtggtcgccgagtcggtgtcgtccttgaccatcgccgacgcgttcattgcagccggcgagagctcagctccgaccccgccgcgccccgcgcttcccaggaggttcatctgctccttccctgactgcagcgccaattacagcaaagcctggaagcttgacgcgcacctgtgcaagcacacgggggagagaccatttgtttgtgactatgaagggtgtggcaaggccttcatcagggactaccatctgagccgccacattctgactcacacaggagaaaagccgtttgtttgtgcagccaatggctgtgatcaaaaattcaacacaaaatcaaacttgaagaaacattttgaacgcaaacatgaaaatcaacaaaaacaatatata…
Q99676	ZNF184	JG-ZNF-49	1	Yes	1	mRNA V2	6.87316	172.829	KRAB	atggaagatctgtcctctccagactccacccttctccaagggggacataatctactctcatcagccagttttcaggaatcggtgactttcaaggatgtgatagtggactttacccaggaagaatggaaacagctggaccctggccagagagatttgttcagggatgtgacattggaaaattatacacacctggtctctataggactccaagtttctaaacctgatgtgatttcccagttagagcaagggacagagccatggatcatggagccaagcattccagtaggtacctgtgcagactgggagacaagacttgaaaatagtgtgtcagccccagagcctgacatttctgaagaagagctatctccagaggtaatagtggaaaaacacaaaagagat…
Q96HQ0	ZNF419	JG-ZNF-84	1	Yes	1	mRNA V2	1.93876	51.6114	KRAB	atggcggcggccgccctgagggaccccgctcaggttcctgtggctgcagacttgcttacagaccatgaggagggctatgtgacctttgaggatgtggctgtctacttctcccaggaggaatggagattgcttgatgacgctcagaggctcctctaccgcaatgtgatgctggagaactttacacttctggcctctctcggacttgcatcttccaagacccatgaaataacccagctggagtcatgggaggagcccttcatgcctgcttgggaagttgtgacttcagccataccgagaggttgttggcatggagccgaggctgaggaggctcctgagcagattgcttctgtaggactgctcagttcaaacattcagcaacaccagaagcagcactgtgga…
Q53GI3	ZNF394	JG-ZNF-80	1	Yes	1	mRNA V2	3.44787	189.2	SCAN,KRAB	atgaattccagcttgaccgcccagaggcgcggcagtgacgccgagttgggaccctgggtgatggctgcgaggtccaaggacgcggcgccgtcccaacgcgacggacttttgcccgtgaaagtggaggaagactcacccggaagttgggagcccaactatcccgcggcttcgccggaccccgaaacttctcgactgcactttaggcagctgcgttaccaggaggtggctggaccggaagaggcgctgagccggctccgagaactctgtcgtcggtggctgagacccgagctgctctccaaggagcagatcctggagctgctggtgctggagcagttcctcaccatcctgcccgaggagcttcaagcctgggtgcgagagcactgcccagagagcggggag…
