# Supplementary material for: Multiparameter functional diversity of human C2H2 zinc finger proteins
Source: Genome Res. 2016 Dec;26(12):1742–52. doi: 10.1101/gr.209643.116 (PMC5131825; doi:10.1101/gr.209643.116)
Supplement: Supplemental Material [file supp_gr.209643.116_Supplemental_Table_S3.xlsx]

## Sheet: legend
Supplemental Table S3 (related to Figure 2): Parameters and statistics from the ChIP-seq analysis of 131 C2H2-ZF proteins.
Column	Description
UniProtID	The UniProt ID of the ChIP protein
Symbol	The HGNC symbol of the ChIP protein
Auxiliary Domains	The auxiliary domains of the ChIP protein
Number of ZF domains	The number of C2H2-ZF domains that the ChIP protein
Number of replicates	The number of ChIP-seq replicates for each protein
Motif: Optimization Program	The program that was used to optimize the ChIP-seq motif
Motif: Peaks	The type of peaks that were used for motif optimization (non-ERE: peaks that do not overlap endogenous repeat elements)
Motif: AUC	The area under ROC curve of the motif for distinguishing top 500 peaks from dinucleotide-shuffled sequences
Motif: Centrality p-value	The P-value for centrality of the motif with respect to peak summits, calculated by CentriMo
Peak enrichment among top motif hits (z-score)	Mann-Whitney U z-score of the difference of MACS scores of motif-containing peaks vs. peaks with no motif hit
Motif enrichment among top peaks (z-score)	Mann-Whitney U z-score of the difference of motif scores of peaks that pass the MACS cutoff vs. peaks that do not pass the cutoff
Number of peaks	Total number of peaks that pass the optimized MACS score cutoff
Number of motif-containing peaks	The number of peaks that contain at least one motif match
Percentage of motif-containing peaks	The percentage of peaks that contain at least one motif match
Motif-containing peaks within 10kb of a TSS	The number of motif-containing peaks that are no farther than 10kb from their nearest TSS
Percentage of motif-containing peaks within 10kb of a TSS	The percentage of motif-containing peaks that are no farther than 10kb from their nearest TSS

## Sheet: table
UniProtID	Symbol	Auxiliary Domains	Number of ZF domains	Number of replicates	Motif: Optimization Program	Motif: Peaks	Motif: AUC	Motif: Centrality p-value	Peak enrichment among top motif hits (z-score)	Motif enrichment among top peaks (z-score)	Number of peaks	Number of motif-containing peaks	Percentage of motif-containing peaks	Motif-containing peaks within 10kb of a TSS	Percentage of motif-containing peaks within 10kb of a TSS
P98182	ZNF200	-	5	1	RCADE	non-ERE	0.79	3.9e-51	31.4	31.6	895	480	0.536	464	0.967
Q02086	SP2	-	3	1	RCADE	non-ERE	0.76	7.8e-24	76.5	72.9	12525	7814	0.624	7053	0.903
Q9HCK0	ZBTB26	BTB	4	2	MEME	non-ERE	0.65	1e-20	131.5	117.4	12960	9592	0.74	8557	0.892
O43829	ZBTB14	BTB	5	1	RCADE	non-ERE	0.66	1.8e-36	122.7	123.6	12710	12129	0.954	10808	0.891
Q9HBE1	PATZ1	BTB	7	1	MEME	non-ERE	0.75	2.9e-05	56.2	55.9	8154	6661	0.817	5730	0.86
Q9Y4X4	KLF12	-	3	1	MEME	non-ERE	0.88	1.5e-44	83.7	82.4	10293	9271	0.901	7966	0.859
Q92664	GTF3A	-	9	1	RCADE	All	0.64	1.7e-22	11.8	12.2	69	41	0.594	35	0.854
P36508	ZNF76	-	7	1	RCADE	non-ERE	0.97	9.9e-143	70.9	64.7	5976	4634	0.775	3930	0.848
O14771	ZNF213	SCAN,KRAB	5	1	RCADE	non-ERE	0.75	6.1e-78	36.6	31.4	1942	622	0.32	522	0.839
O75840	KLF7	-	3	1	MEME	non-ERE	0.88	5.1e-34	31.4	29.7	1198	540	0.451	450	0.833
Q13118	KLF10	-	3	1	MEME	non-ERE	0.83	1.4e-43	40.6	38.7	1251	856	0.684	713	0.833
P56270	MAZ	-	5	1	RCADE	non-ERE	0.84	3.1e-29	73	70.9	13708	13356	0.974	10819	0.81
Q02446	SP4	-	3	4	MEME	non-ERE	0.85	2.3e-14	147.3	143.3	27454	22757	0.829	17887	0.786
Q9NPA5	ZFP64	-	10	3	MEME	non-ERE	0.74	2.8e-70	110.8	107.3	27377	14640	0.535	11491	0.785
Q8IWY8	ZSCAN29	SCAN	6	1	RCADE	non-ERE	0.72	3.2e-104	21.5	24.9	256	186	0.727	143	0.769
Q96JF6	ZNF594	-	21	1	RCADE	non-ERE	0.75	1.1e-65	30.5	25.7	1544	637	0.413	488	0.766
Q9Y2X9	ZNF281	-	4	1	RCADE	non-ERE	0.83	6.8e-51	70.6	70.2	8748	6729	0.769	5089	0.756
Q9UIH9	KLF15	-	3	3	MEME	non-ERE	0.84	1.2e-22	139.3	132.8	24502	20681	0.844	15322	0.741
Q9BU19	ZNF692	-	5	1	MEME	non-ERE	0.88	2e-212	36.2	35.7	1360	881	0.648	646	0.733
O95863	SNAI1	-	4	3	MEME	non-ERE	0.84	3.9e-65	15.4	16.3	1361	248	0.182	181	0.73
Q08ER8	ZNF543	KRAB	13	1	RCADE	non-ERE	0.59	1.8e-06	22.3	18.6	756	406	0.537	295	0.727
Q86W11	ZSCAN30	SCAN	7	1	RCADE	non-ERE	0.6	3.4e-10	17.8	14.6	1138	435	0.382	316	0.726
Q8NCA9	ZNF784	-	6	1	RCADE	non-ERE	0.6	9e-16	15.5	12.9	2444	280	0.115	201	0.718
P08047	SP1	-	3	1	MEME	non-ERE	0.71	6.2e-10	90.9	96.4	22812	21690	0.951	15540	0.716
Q8TD94	KLF14	-	3	1	MEME	non-ERE	0.89	6.3e-51	89.3	82.8	23157	15706	0.678	11249	0.716
Q06889	EGR3	-	3	1	RCADE	non-ERE	0.78	1.3e-19	97.4	87.9	27189	10451	0.384	7484	0.716
P10073	ZSCAN22	SCAN	8	4	RCADE	non-ERE	0.9	3.9e-118	159.6	130.8	36833	20199	0.548	14462	0.716
Q8N9Z0	ZNF610	KRAB	8	1	RCADE	non-ERE	0.86	5.1e-155	53.7	54.9	6601	3392	0.514	2412	0.711
Q09FC8	ZNF415	-	11	1	MEME	non-ERE	0.79	6.6e-110	32.1	27.9	524	330	0.63	229	0.694
Q9BYN7	ZNF341	-	11	1	MEME	non-ERE	0.77	6.4e-47	101	96.7	19800	16550	0.836	11275	0.681
Q6ZN55	ZNF574	-	19	2	RCADE	non-ERE	0.87	2.6e-186	38.5	34.6	29381	15573	0.53	10569	0.679
Q99592	ZBTB18	BTB	4	2	RCADE	non-ERE	0.91	4.7e-162	47.7	43.9	2392	1479	0.618	997	0.674
Q13351	KLF1	-	3	1	MEME	non-ERE	0.89	2e-60	80.8	80.9	21948	19913	0.907	13380	0.672
Q9UKT9	IKZF3	-	6	1	RCADE	non-ERE	0.66	2.5e-16	35.6	34.9	18090	17204	0.951	11038	0.642
Q9Y2Q1	ZNF257	KRAB	11	2	MEME	non-ERE	0.96	3.5e-223	55.6	51.2	2340	1622	0.693	1020	0.629
P25490	YY1	-	4	4	RCADE	non-ERE	0.91	2.3e-143	74.8	74.4	42911	9517	0.222	5875	0.617
Q96C55	ZNF524	-	4	1	MEME	All	0.93	1.3e-220	47.6	48.1	3388	2331	0.688	1438	0.617
Q8NBF1	GLIS1	-	4	1	MEME	non-ERE	0.79	5.1e-69	68.9	64.2	24990	18103	0.724	11013	0.608
Q96MM3	ZFP42	-	4	2	RCADE	non-ERE	0.94	1.2e-190	47.5	48.2	3309	1820	0.55	1079	0.593
Q9Y330	ZBTB12	BTB	4	6	RCADE	non-ERE	0.86	3.7e-127	51.4	49.8	4031	1400	0.347	820	0.586
Q15916	ZBTB6	BTB	4	3	MEME	non-ERE	0.92	4.1e-109	107.7	104	27469	22315	0.812	12930	0.579
Q6NX45	ZNF774	KRAB	12	1	RCADE	non-ERE	0.61	7.5e-05	7.1	4.6	345	30	0.087	17	0.567
O75820	ZNF189	KRAB	16	1	RCADE	non-ERE	0.89	1.1e-158	57	56	10007	5132	0.513	2850	0.555
P10074	ZBTB48	BTB	11	1	MEME	non-ERE	0.82	5.6e-80	42.6	44.7	34250	30564	0.892	16964	0.555
P11161	EGR2	-	3	2	RCADE	non-ERE	0.78	9.2e-35	108.5	113.7	71977	64328	0.894	35447	0.551
Q7Z7K2	ZNF467	-	12	2	RCADE	non-ERE	0.81	2.2e-54	79.8	82.8	59990	52703	0.879	28493	0.541
Q8TC21	ZNF596	KRAB	11	2	RCADE	non-ERE	0.67	2.3e-50	53.3	41.8	4677	1240	0.265	654	0.527
P17020	ZNF16	-	15	2	RCADE	non-ERE	0.76	5.3e-129	33.8	34	681	394	0.579	204	0.518
P49711	CTCF	-	11	7	RCADE	non-ERE	0.86	5.9e-121	237.4	223	85485	65489	0.766	33774	0.516
B2RXF5	ZBTB42	BTB	4	1	RCADE	non-ERE	0.91	2.6e-140	64.7	66.4	33372	26589	0.797	13698	0.515
Q8N2R0	OSR2	-	5	1	MEME	non-ERE	0.8	4.3e-75	48.8	46.4	34153	23236	0.68	11844	0.51
Q86TJ5	ZNF554	KRAB	7	1	RCADE	non-ERE	0.88	6.3e-162	48.7	44.6	16014	10241	0.64	5160	0.504
O75626	PRDM1	SET	5	1	MEME	non-ERE	0.82	1.3e-71	47.2	44	17995	14743	0.819	7425	0.504
P17022	ZNF18	SCAN,KRAB	5	1	MEME	non-ERE	0.97	6.5e-220	59.8	63.1	10805	7825	0.724	3935	0.503
P28698	MZF1	SCAN	13	2	MEME	non-ERE	0.84	1.9e-152	42.2	54.7	19151	8307	0.434	4165	0.501
P59817	ZNF280A	-	5	1	MEME	non-ERE	0.99	0.014	13	17	540	36	0.067	18	0.5
Q9NPC7	MYNN	BTB	8	1	RCADE	non-ERE	0.77	1.3e-139	30.3	40.9	3107	1457	0.469	717	0.492
Q6P9G9	ZNF449	SCAN	7	1	RCADE	non-ERE	0.94	4.3e-255	63.5	60.2	2997	1534	0.512	754	0.492
Q96LW9	ZSCAN31	SCAN	6	2	RCADE	All	0.89	2.6e-269	28.3	31.5	3196	578	0.181	284	0.491
Q6IQ21	ZNF770	-	10	1	MEME	non-ERE	0.94	1.7e-168	36.5	54.4	66795	56930	0.852	27877	0.49
Q9H5H4	ZNF768	-	10	1	RCADE	All	0.91	5.3e-227	51.2	56.6	4610	2634	0.571	1280	0.486
Q9NQZ8	ZNF71	-	13	1	RCADE	All	0.7	7.3e-61	16.4	20.6	800	140	0.175	68	0.486
A6NK75	ZNF98	KRAB	13	1	RCADE	non-ERE	0.71	1.2e-48	12.2	16	1493	354	0.237	169	0.477
Q96MU6	ZNF778	KRAB	14	1	RCADE	non-ERE	0.67	9.3e-53	22.6	26.8	1804	709	0.393	336	0.474
P17032	ZNF37A	KRAB	10	1	RCADE	non-ERE	0.62	0.00022	13.7	7.7	577	382	0.662	180	0.471
P17039	ZNF30	KRAB	16	3	MEME	non-ERE	0.74	1.4e-108	40.8	38.7	6843	944	0.138	444	0.47
Q8IZ26	ZNF34	KRAB	12	1	MEME	non-ERE	0.61	3.8e-28	14.7	17.4	182	92	0.505	43	0.467
Q8TA94	ZNF563	KRAB	11	1	RCADE	non-ERE	0.78	4.1e-118	52.3	44.2	4759	2831	0.595	1289	0.455
Q96NJ6	ZFP3	-	13	1	RCADE	non-ERE	0.85	1.8e-176	52.5	53.9	1306	952	0.729	433	0.455
P10075	GLI4	-	7	1	MEME	non-ERE	0.97	6.7e-48	17.4	26.1	3517	487	0.138	221	0.454
Q9C0F3	ZNF436	KRAB	12	1	RCADE	non-ERE	0.98	2.2e-307	89.8	90.9	4536	3614	0.797	1640	0.454
P58317	ZNF121	-	9	2	RCADE	non-ERE	0.8	5.4e-122	94.3	97	42071	15717	0.374	7124	0.453
P52741	ZNF134	-	10	1	RCADE	non-ERE	0.94	1.1e-207	63.1	63	8231	5155	0.626	2326	0.451
O14978	ZNF263	SCAN,KRAB	9	1	MEME	non-ERE	0.8	7e-06	14.3	15.1	107	69	0.645	31	0.449
A2RRD8	ZNF320	KRAB	11	2	RCADE	non-ERE	0.95	1e-300	82.3	78.1	9844	4764	0.484	2110	0.443
Q6U7Q0	ZNF322	-	8	2	RCADE	non-ERE	0.93	4.7e-276	120	118.2	48934	26838	0.548	11754	0.438
Q9GZX5	ZNF350	KRAB	8	2	RCADE	non-ERE	0.78	9.2e-110	36	40.1	3795	1422	0.375	610	0.429
Q5HYK9	ZNF667	KRAB	14	1	RCADE	non-ERE	0.69	5.6e-89	22.1	27.3	362	221	0.61	94	0.425
O43296	ZNF264	KRAB	13	2	MEME	non-ERE	0.84	1.1e-119	69.2	68.3	7498	2894	0.386	1217	0.421
A6NGD5	ZSCAN5C	SCAN	5	1	RCADE	non-ERE	0.82	2.1e-101	35.8	37.7	6297	3214	0.51	1319	0.41
A0PJY2	FEZF1	-	6	1	RCADE	non-ERE	0.76	1.7e-59	19.9	22.6	40262	27186	0.675	11086	0.408
Q96NG8	ZNF582	KRAB	9	2	RCADE	non-ERE	0.76	3.9e-123	29.5	28.6	424	280	0.66	113	0.404
Q0VGE8	ZNF816	KRAB	15	1	RCADE	non-ERE	0.94	4.4e-265	42.4	45	2084	1141	0.548	456	0.4
Q86UD4	ZNF329	-	12	1	RCADE	non-ERE	0.74	1.7e-92	42	44.5	2401	900	0.375	359	0.399
P13682	ZNF35	-	11	2	RCADE	non-ERE	0.71	9.5e-52	25	31.7	3259	625	0.192	248	0.397
Q03923	ZNF85	KRAB	15	1	RCADE	non-ERE	0.88	1.7e-197	35.9	40.8	2283	1234	0.541	481	0.39
Q8N8E2	ZNF513	-	8	1	RCADE	All	0.75	2.5e-25	31	32.5	422	372	0.882	145	0.39
Q8TBZ5	ZNF502	-	14	2	RCADE	non-ERE	0.71	4.4e-105	25.8	25.6	325	231	0.711	90	0.39
Q9UL59	ZNF214	KRAB	10	1	RCADE	non-ERE	0.64	2.4e-69	22.6	25.2	315	217	0.689	83	0.382
P17026	ZNF22	-	5	5	RCADE	non-ERE	0.62	2.3e-68	243.7	232.2	94769	66183	0.698	24661	0.373
Q8N9F8	ZNF454	KRAB	12	2	RCADE	non-ERE	0.82	1.8e-160	39.3	45.1	3998	1226	0.307	454	0.37
Q9NQX0	PRDM6	SET	3	1	MEME	non-ERE	0.58	5.8e-05	5.7	6.2	34065	31202	0.916	11500	0.369
Q53GI3	ZNF394	SCAN,KRAB	6	1	MEME	All	0.57	0.00036	6.6	7.8	32	19	0.594	7	0.368
Q8TF45	ZNF418	KRAB	16	1	RCADE	non-ERE	0.72	1.1e-65	28.1	27	619	337	0.544	122	0.362
P52738	ZNF140	KRAB	10	1	RCADE	non-ERE	0.88	5.6e-159	58.7	62.7	6077	2593	0.427	938	0.362
P17019	ZNF708	-	15	1	RCADE	non-ERE	0.84	2e-179	35.2	34.9	917	573	0.625	207	0.361
Q99676	ZNF184	KRAB	19	1	RCADE	All	0.64	4.7e-32	11.4	10	155	36	0.232	13	0.361
Q8TF68	ZNF384	-	8	1	RCADE	non-ERE	0.75	2.2e-114	140.4	152.5	145760	46660	0.32	16583	0.355
Q6P9A3	ZNF549	KRAB	13	1	MEME	All	0.95	9.5e-294	43.9	49	2561	1229	0.48	435	0.354
Q06730	ZNF33A	KRAB	16	1	RCADE	All	0.72	5.8e-75	18.3	26.2	338	162	0.479	57	0.352
Q96BR6	ZNF669	KRAB	9	2	RCADE	non-ERE	0.7	3.4e-81	25.3	32.6	369	259	0.702	90	0.347
O75467	ZNF324	KRAB	9	1	RCADE	non-ERE	0.73	1e-85	35.5	38.5	1103	683	0.619	232	0.34
Q5T5D7	ZNF684	KRAB	8	1	MEME	non-ERE	0.73	1.1e-107	28.3	28.2	424	285	0.672	96	0.337
P51814	ZNF41	KRAB	17	3	RCADE	non-ERE	0.93	7.4e-287	45.9	40.3	1650	673	0.408	225	0.334
O60765	ZNF354A	KRAB	13	1	RCADE	All	0.88	1.6e-205	31	33.5	604	405	0.671	135	0.333
Q8IVP9	ZNF547	KRAB	10	1	RCADE	All	0.9	7.3e-236	36.4	37.3	2145	959	0.447	319	0.333
Q9NZL3	ZNF224	KRAB	18	1	RCADE	All	0.81	1.3e-112	22.2	20.5	548	248	0.453	81	0.327
Q86XU0	ZNF677	KRAB	11	1	RCADE	non-ERE	0.69	2e-56	26	24.8	383	233	0.608	75	0.322
Q9NQX6	ZNF331	KRAB	12	2	RCADE	non-ERE	0.95	7.2e-308	61.2	65.3	2690	1646	0.612	528	0.321
Q3MIS6	ZNF528	KRAB	15	4	RCADE	non-ERE	0.89	2.9e-216	56.3	73.4	2866	1373	0.479	440	0.32
Q96PE6	ZIM3	KRAB	11	1	RCADE	non-ERE	0.99	1e-300	78	84.8	22771	14573	0.64	4657	0.32
Q8NEM1	ZNF680	KRAB	12	2	RCADE	non-ERE	0.94	7.1e-251	83.9	83.4	7677	4697	0.612	1498	0.319
P17098	ZNF8	KRAB	7	1	RCADE	non-ERE	0.77	3.5e-122	83	88	8031	5148	0.641	1630	0.317
Q96PQ6	ZNF317	KRAB	13	3	RCADE	non-ERE	0.8	2e-127	90.2	98.1	44941	15155	0.337	4755	0.314
Q9BWW7	SCRT1	-	5	1	RCADE	non-ERE	0.99	1e-300	132.5	154.2	64806	33272	0.513	10431	0.314
Q8N141	ZFP82	KRAB	12	1	RCADE	All	0.84	4.6e-200	28.2	31.1	731	399	0.546	120	0.301
Q8NHY6	ZFP28	KRAB,KRAB	14	2	RCADE	non-ERE	0.87	2.3e-217	67.1	61.9	3440	2124	0.617	625	0.294
Q9H4T2	ZSCAN16	SCAN	4	3	MEME	non-ERE	0.8	1.9e-32	153.2	166.8	71007	37313	0.525	10905	0.292
Q02386	ZNF45	KRAB	15	1	RCADE	All	0.69	1.8e-25	12.4	6.7	278	42	0.151	12	0.286
Q96SR6	ZNF382	KRAB	9	5	RCADE	non-ERE	0.94	6.3e-276	147.9	175.6	29416	14546	0.494	3889	0.267
P15622	ZNF250	KRAB	13	2	RCADE	non-ERE	0.59	5e-09	64.4	83.9	36716	20797	0.566	5535	0.266
Q14593	ZNF273	KRAB	10	1	RCADE	All	0.9	7.2e-76	32.8	35.8	527	389	0.738	103	0.265
Q9Y473	ZNF175	KRAB	13	1	MEME	All	0.67	8.9e-34	10.8	12.9	65	34	0.523	9	0.265
Q3ZCT1	ZNF260	-	13	1	RCADE	non-ERE	0.7	2.1e-07	39.2	42.5	22435	13781	0.614	3404	0.247
Q96HQ0	ZNF419	KRAB	11	1	RCADE	All	0.61	4.2e-17	11.5	11.7	82	41	0.5	10	0.244
Q8TD23	ZNF675	KRAB	12	1	RCADE	non-ERE	0.96	2.5e-306	81.4	90.9	5839	4552	0.78	1042	0.229
Q9ULM2	ZNF490	KRAB	13	1	MEME	non-ERE	0.96	1e-300	72.5	88.1	10911	7980	0.731	1826	0.229
Q15072	ZNF146	-	10	1	RCADE	non-ERE	0.71	8.9e-59	130.3	131.7	45993	42048	0.914	9529	0.227
P52737	ZNF136	KRAB	13	2	MEME	All	0.98	1e-300	100.1	112.6	8933	5309	0.594	1198	0.226
Q8IYB9	ZNF595	KRAB	17	1	RCADE	All	0.65	8.3e-97	20.1	18.7	168	105	0.625	23	0.219
Q9NXT0	ZNF586	KRAB	8	1	RCADE	All	0.99	1e-300	75.6	74.4	4085	2964	0.726	576	0.194
