# Supplementary material for: Multiparameter functional diversity of human C2H2 zinc finger proteins
Source: Genome Res. 2016 Dec;26(12):1742–52. doi: 10.1101/gr.209643.116 (PMC5131825; doi:10.1101/gr.209643.116)
Supplement: Supplemental Material [file supp_gr.209643.116_Supplemental_Table_S5.xlsx]

## Sheet: Legend
Supplemental Table S5 (related to Figure 5). Table of the AP-MS interactions. SAINT scores and normalized fold change of spectral counts for a filtered set of bait and nuclear prey proteins (first tab) and complete list of unfiltered bait-prey interactions (second tab)

## Sheet: Interactions with nuclear preys
Bait_UniProtID	Prey_UniProtID	Bait_GeneName	Prey_GeneName	Bait_EffectorDomain	SAINTexpress_AvgP	FoldChangeSPC
A0PJY2	O00505	FEZF1	KPNA3	NONE	0.98	2.95936
A0PJY2	O00629	FEZF1	KPNA4	NONE	0.5	1.76651
A0PJY2	O43542	FEZF1	XRCC3	NONE	1	5.31537
A0PJY2	O43663	FEZF1	PRC1	NONE	0.48	1.71682
A0PJY2	O43813	FEZF1	LANCL1	NONE	0	1.16952
A0PJY2	O60341	FEZF1	KDM1A	NONE	0	1.12186
A0PJY2	O75489	FEZF1	NDUFS3	NONE	0.58	2.25667
A0PJY2	O75694	FEZF1	NUP155	NONE	1	3.83102
A0PJY2	O95394	FEZF1	PGM3	NONE	0	1.1418
A0PJY2	P02545	FEZF1	LMNA	NONE	0	0.555673
A0PJY2	P07199	FEZF1	CENPB	NONE	0	0.964601
A0PJY2	P07858	FEZF1	CTSB	NONE	0.73	1.68536
A0PJY2	P09132	FEZF1	SRP19	NONE	0	1.1418
A0PJY2	P14373	FEZF1	TRIM27	NONE	0	1.36813
A0PJY2	P17029	FEZF1	ZKSCAN1	NONE	0.41	1.60782
A0PJY2	P17096	FEZF1	HMGA1	NONE	0	0.56058
A0PJY2	P17480	FEZF1	UBTF	NONE	1	4.51418
A0PJY2	P17980	FEZF1	PSMC3	NONE	0.09	1.36158
A0PJY2	P28482	FEZF1	MAPK1	NONE	0.39	1.31632
A0PJY2	P35251	FEZF1	RFC1	NONE	0.45	1.30689
A0PJY2	P49916	FEZF1	LIG3	NONE	0.62	1.91099
A0PJY2	P51784	FEZF1	USP11	NONE	1	2.42193
A0PJY2	P60510	FEZF1	PPP4C	NONE	0.95	2.36853
A0PJY2	P61962	FEZF1	DCAF7	NONE	1	4.45116
A0PJY2	P62195	FEZF1	PSMC5	NONE	0	1.23766
A0PJY2	P63167	FEZF1	DYNLL1	NONE	0.01	0.722304
A0PJY2	P63244	FEZF1	GNB2L1	NONE	0	0.7907
A0PJY2	P67775	FEZF1	PPP2CA	NONE	0.91	2.42816
A0PJY2	Q02241	FEZF1	KIF23	NONE	0.91	1.54829
A0PJY2	Q02880	FEZF1	TOP2B	NONE	0	0.780869
A0PJY2	Q04724	FEZF1	TLE1	NONE	0.5	2.06523
A0PJY2	Q04726	FEZF1	TLE3	NONE	0.92	3.15768
A0PJY2	Q07021	FEZF1	C1QBP	NONE	0	0.604667
A0PJY2	Q12769	FEZF1	NUP160	NONE	0.73	2.28992
A0PJY2	Q12888	FEZF1	TP53BP1	NONE	0.48	1.57102
A0PJY2	Q13263	FEZF1	TRIM28	NONE	0.51	1.88139
A0PJY2	Q13363	FEZF1	CTBP1	NONE	0.5	1.68924
A0PJY2	Q13428	FEZF1	TCOF1	NONE	0	0.85116
A0PJY2	Q13547	FEZF1	HDAC1	NONE	0	0.967531
A0PJY2	Q13557	FEZF1	CAMK2D	NONE	0	1.43537
A0PJY2	Q13616	FEZF1	CUL1	NONE	0.41	1.63658
A0PJY2	Q13618	FEZF1	CUL3	NONE	0	1.16247
A0PJY2	Q13643	FEZF1	FHL3	NONE	0.41	1.72936
A0PJY2	Q14160	FEZF1	SCRIB	NONE	0.98	2.05994
A0PJY2	Q14566	FEZF1	MCM6	NONE	0.01	1.4642
A0PJY2	Q14684	FEZF1	RRP1B	NONE	0	0.757169
A0PJY2	Q14839	FEZF1	CHD4	NONE	0.24	1.68074
A0PJY2	Q15654	FEZF1	TRIP6	NONE	1	10.6746
A0PJY2	Q49A26	FEZF1	GLYR1	NONE	0.85	1.99911
A0PJY2	Q5H9R7	FEZF1	PPP6R3	NONE	1	2.26194
A0PJY2	Q5SY16	FEZF1	NOL9	NONE	0.95	1.98272
A0PJY2	Q6PD62	FEZF1	CTR9	NONE	0.5	1.82613
A0PJY2	Q7Z5L9	FEZF1	IRF2BP2	NONE	0	1.16247
A0PJY2	Q7Z6Z7	FEZF1	HUWE1	NONE	1	6.85585
A0PJY2	Q8IZL8	FEZF1	PELP1	NONE	0.52	2.13206
A0PJY2	Q8N163	FEZF1	CCAR2	NONE	0.5	1.62913
A0PJY2	Q8N7H5	FEZF1	PAF1	NONE	1	5.34781
A0PJY2	Q8NFW8	FEZF1	CMAS	NONE	0	1.07792
A0PJY2	Q8WVC0	FEZF1	LEO1	NONE	0.5	2.23529
A0PJY2	Q92522	FEZF1	H1FX	NONE	0.1	0.837099
A0PJY2	Q92598	FEZF1	HSPH1	NONE	1	4.03376
A0PJY2	Q92769	FEZF1	HDAC2	NONE	0.02	1.42262
A0PJY2	Q93009	FEZF1	USP7	NONE	0.78	2.30169
A0PJY2	Q96EE3	FEZF1	SEH1L	NONE	0.87	6.37008
A0PJY2	Q96EY1	FEZF1	DNAJA3	NONE	0	0.730538
A0PJY2	Q96PV6	FEZF1	LENG8	NONE	0	1.07792
A0PJY2	Q96T88	FEZF1	Q96T88	NONE	1	2.6169
A0PJY2	Q99627	FEZF1	COPS8	NONE	0	1.22921
A0PJY2	Q9BQ67	FEZF1	GRWD1	NONE	0.63	1.6595
A0PJY2	Q9GZS3	FEZF1	WDR61	NONE	1	3.21036
A0PJY2	Q9H2D6	FEZF1	TRIOBP	NONE	0	1.18389
A0PJY2	Q9H7D7	FEZF1	WDR26	NONE	0.12	1.19494
A0PJY2	Q9NVP1	FEZF1	DDX18	NONE	0.23	1.21524
A0PJY2	Q9NY12	FEZF1	GAR1	NONE	0.65	1.71445
A0PJY2	Q9UBW7	FEZF1	ZMYM2	NONE	1	3.55681
A0PJY2	Q9UGI8	FEZF1	TES	NONE	0.18	1.3292
A0PJY2	Q9UKN8	FEZF1	GTF3C4	NONE	0	1.20613
A0PJY2	Q9UL42	FEZF1	PNMA2	NONE	0.95	1.80224
A0PJY2	Q9ULX6	FEZF1	AKAP8L	NONE	0.09	1.16949
A0PJY2	Q9UN30	FEZF1	SCML1	NONE	0	1.29962
A0PJY2	Q9Y2R4	FEZF1	DDX52	NONE	0	1.14654
A0PJY2	Q9Y2S7	FEZF1	Q9Y2S7	NONE	1	4.09934
A0PJY2	Q9Y4W2	FEZF1	LAS1L	NONE	0.72	1.92812
A0PJY2	Q9Y5Q8	FEZF1	GTF3C5	NONE	0	1.13507
A2RRD8	O00505	ZNF320	KPNA3	KRAB	0.48	1.81943
A2RRD8	O00629	ZNF320	KPNA4	KRAB	0	0.97893
A2RRD8	O14641	ZNF320	DVL2	KRAB	0	1.08863
A2RRD8	O43663	ZNF320	PRC1	KRAB	0	1.29352
A2RRD8	O60341	ZNF320	KDM1A	KRAB	0	1.13487
A2RRD8	O75489	ZNF320	NDUFS3	KRAB	0	0.754347
A2RRD8	O75694	ZNF320	NUP155	KRAB	0.05	1.11257
A2RRD8	P02545	ZNF320	LMNA	KRAB	0	0.713205
A2RRD8	P07858	ZNF320	CTSB	KRAB	0.73	1.74664
A2RRD8	P12270	ZNF320	TPR	KRAB	0	0.915997
A2RRD8	P17096	ZNF320	HMGA1	KRAB	0.05	1.23095
A2RRD8	P17480	ZNF320	UBTF	KRAB	1	3.26791
A2RRD8	P35251	ZNF320	RFC1	KRAB	0.45	1.32663
A2RRD8	P38432	ZNF320	COIL	KRAB	0	1.17868
A2RRD8	P49916	ZNF320	LIG3	KRAB	0.25	1.13915
A2RRD8	P51784	ZNF320	USP11	KRAB	0.48	1.51269
A2RRD8	P60510	ZNF320	PPP4C	KRAB	0	1.1595
A2RRD8	P62195	ZNF320	PSMC5	KRAB	0.01	1.26202
A2RRD8	P63167	ZNF320	DYNLL1	KRAB	0.01	0.771907
A2RRD8	P63244	ZNF320	GNB2L1	KRAB	0	0.937405
A2RRD8	Q02241	ZNF320	KIF23	KRAB	0.45	1.1761
A2RRD8	Q02386	ZNF320	ZNF45	KRAB	0.91	1.96227
A2RRD8	Q07021	ZNF320	C1QBP	KRAB	0	0.649817
A2RRD8	Q12769	ZNF320	NUP160	KRAB	0	0.871521
A2RRD8	Q13263	ZNF320	TRIM28	KRAB	1	9.36663
A2RRD8	Q13428	ZNF320	TCOF1	KRAB	0	0.300819
A2RRD8	Q13547	ZNF320	HDAC1	KRAB	0	0.711648
A2RRD8	Q14566	ZNF320	MCM6	KRAB	0	1.09488
A2RRD8	Q14684	ZNF320	RRP1B	KRAB	0	0.562556
A2RRD8	Q14839	ZNF320	CHD4	KRAB	0.04	1.09808
A2RRD8	Q49A26	ZNF320	GLYR1	KRAB	0.25	1.20341
A2RRD8	Q5H9R7	ZNF320	PPP6R3	KRAB	1	2.52713
A2RRD8	Q7Z6Z7	ZNF320	HUWE1	KRAB	0.26	1.55149
A2RRD8	Q8N163	ZNF320	CCAR2	KRAB	0	1.01008
A2RRD8	Q8N7H5	ZNF320	PAF1	KRAB	0.91	2.49159
A2RRD8	Q92522	ZNF320	H1FX	KRAB	0.21	0.996379
A2RRD8	Q93009	ZNF320	USP7	KRAB	0.2	1.34418
A2RRD8	Q96EY1	ZNF320	DNAJA3	KRAB	0.76	1.73413
A2RRD8	Q96PV6	ZNF320	LENG8	KRAB	0.41	1.32663
A2RRD8	Q96RT1	ZNF320	ERBB2IP	KRAB	0.41	1.49501
A2RRD8	Q9GZS3	ZNF320	WDR61	KRAB	0.41	1.65728
A2RRD8	Q9H4B6	ZNF320	SAV1	KRAB	1	4.04431
A2RRD8	Q9H6S0	ZNF320	YTHDC2	KRAB	0.05	1.40123
A2RRD8	Q9NRL2	ZNF320	BAZ1A	KRAB	0	1.14093
A2RRD8	Q9NVP1	ZNF320	DDX18	KRAB	0	0.581082
A2RRD8	Q9UL42	ZNF320	PNMA2	KRAB	0.95	2.47997
A2RRD8	Q9ULT8	ZNF320	HECTD1	KRAB	1	5.42396
A2RRD8	Q9ULX6	ZNF320	AKAP8L	KRAB	0.18	1.39231
A2RRD8	Q9UN30	ZNF320	SCML1	KRAB	1	2.93858
A2RRD8	Q9Y2R4	ZNF320	DDX52	KRAB	0.99	2.41243
A2RRD8	Q9Y2S7	ZNF320	Q9Y2S7	KRAB	0	0.957013
A2RRD8	Q9Y4W2	ZNF320	LAS1L	KRAB	0.09	1.06356
A6NGD5	A6NJL1	ZSCAN5C	ZSCAN5B	SCAN	1	3.6971
A6NGD5	O00505	ZSCAN5C	KPNA3	SCAN	0	1.07061
A6NGD5	O14641	ZSCAN5C	DVL2	SCAN	0	1.04335
A6NGD5	O43242	ZSCAN5C	PSMD3	SCAN	0	0.840088
A6NGD5	O43663	ZSCAN5C	PRC1	SCAN	0.5	1.88192
A6NGD5	O60341	ZSCAN5C	KDM1A	SCAN	1	9.03908
A6NGD5	O75362	ZSCAN5C	ZNF217	SCAN	1	3.42739
A6NGD5	O75489	ZSCAN5C	NDUFS3	SCAN	0.02	0.956666
A6NGD5	O75694	ZSCAN5C	NUP155	SCAN	0.11	1.06913
A6NGD5	P09132	ZSCAN5C	SRP19	SCAN	0	1.36024
A6NGD5	P12270	ZSCAN5C	TPR	SCAN	0	0.844417
A6NGD5	P17096	ZSCAN5C	HMGA1	SCAN	0	0.561231
A6NGD5	P17480	ZSCAN5C	UBTF	SCAN	0.95	1.83632
A6NGD5	P29590	ZSCAN5C	PML	SCAN	0	0.9868
A6NGD5	P49916	ZSCAN5C	LIG3	SCAN	0.41	1.32904
A6NGD5	P61962	ZSCAN5C	DCAF7	SCAN	0.1	0.96487
A6NGD5	P63167	ZSCAN5C	DYNLL1	SCAN	1	2.32927
A6NGD5	P63244	ZSCAN5C	GNB2L1	SCAN	0	0.486901
A6NGD5	P67775	ZSCAN5C	PPP2CA	SCAN	0.09	1.21651
A6NGD5	Q02241	ZSCAN5C	KIF23	SCAN	0.45	1.0973
A6NGD5	Q07021	ZSCAN5C	C1QBP	SCAN	0	0.583922
A6NGD5	Q13263	ZSCAN5C	TRIM28	SCAN	0	0.585914
A6NGD5	Q13428	ZSCAN5C	TCOF1	SCAN	0	0.776523
A6NGD5	Q13547	ZSCAN5C	HDAC1	SCAN	0	0.627698
A6NGD5	Q14160	ZSCAN5C	SCRIB	SCAN	0	1.04533
A6NGD5	Q14566	ZSCAN5C	MCM6	SCAN	0	0.324599
A6NGD5	Q14684	ZSCAN5C	RRP1B	SCAN	0	0.465049
A6NGD5	Q49A26	ZSCAN5C	GLYR1	SCAN	0.5	1.52388
A6NGD5	Q5H9R7	ZSCAN5C	PPP6R3	SCAN	0.45	1.36493
A6NGD5	Q86X55	ZSCAN5C	CARM1	SCAN	0	0.840088
A6NGD5	Q8N163	ZSCAN5C	CCAR2	SCAN	0	0.675694
A6NGD5	Q8N7H5	ZSCAN5C	PAF1	SCAN	0.41	1.34141
A6NGD5	Q8WVC0	ZSCAN5C	LEO1	SCAN	0	1.0568
A6NGD5	Q92598	ZSCAN5C	HSPH1	SCAN	0.01	0.913116
A6NGD5	Q92769	ZSCAN5C	HDAC2	SCAN	0.02	1.3478
A6NGD5	Q93009	ZSCAN5C	USP7	SCAN	0	0.898741
A6NGD5	Q96EY1	ZSCAN5C	DNAJA3	SCAN	0.36	1.11297
A6NGD5	Q99627	ZSCAN5C	COPS8	SCAN	1	3.03991
A6NGD5	Q9BQ39	ZSCAN5C	DDX50	SCAN	0	0.691247
A6NGD5	Q9BQ67	ZSCAN5C	GRWD1	SCAN	0.36	1.27005
A6NGD5	Q9GZS3	ZSCAN5C	WDR61	SCAN	0.04	0.91901
A6NGD5	Q9NVP1	ZSCAN5C	DDX18	SCAN	0	0.798595
A6NGD5	Q9P2K3	ZSCAN5C	RCOR3	SCAN	0	1.2133
A6NGD5	Q9UBW7	ZSCAN5C	ZMYM2	SCAN	1	34.9513
A6NGD5	Q9UKL0	ZSCAN5C	RCOR1	SCAN	1	3.34953
A6NGD5	Q9UL42	ZSCAN5C	PNMA2	SCAN	0.95	1.73142
A6NGD5	Q9Y2S7	ZSCAN5C	Q9Y2S7	SCAN	0	0.890295
A6NGD5	Q9Y4W2	ZSCAN5C	LAS1L	SCAN	0.09	0.804158
A6NK75	P07199	ZNF98	CENPB	KRAB	1	2.62116
A6NK75	P07305	ZNF98	H1F0	KRAB	0	1.06528
A6NK75	P17096	ZNF98	HMGA1	KRAB	0	0.657229
A6NK75	P17480	ZNF98	UBTF	KRAB	0	1.10073
A6NK75	P18887	ZNF98	XRCC1	KRAB	0	1.44109
A6NK75	P49916	ZNF98	LIG3	KRAB	0	1.08244
A6NK75	P57078	ZNF98	RIPK4	KRAB	1	3.50365
A6NK75	P63167	ZNF98	DYNLL1	KRAB	0.02	0.93838
A6NK75	P63244	ZNF98	GNB2L1	KRAB	0	0.329814
A6NK75	Q02880	ZNF98	TOP2B	KRAB	0	0.903633
A6NK75	Q07021	ZNF98	C1QBP	KRAB	0	0.381416
A6NK75	Q13263	ZNF98	TRIM28	KRAB	0	1.18108
A6NK75	Q13428	ZNF98	TCOF1	KRAB	0	0.745224
A6NK75	Q14566	ZNF98	MCM6	KRAB	0	0.414979
A6NK75	Q14684	ZNF98	RRP1B	KRAB	0	0.594229
A6NK75	Q1ED39	ZNF98	KNOP1	KRAB	1	2.31255
A6NK75	Q49A26	ZNF98	GLYR1	KRAB	0.81	1.95643
A6NK75	Q5SY16	ZNF98	NOL9	KRAB	0.48	1.61616
A6NK75	Q7Z6Z7	ZNF98	HUWE1	KRAB	0.17	1.28455
A6NK75	Q8N9M1	ZNF98	C19orf47	KRAB	0.91	1.97764
A6NK75	Q8WYP5	ZNF98	AHCTF1	KRAB	0.48	1.65396
A6NK75	Q92522	ZNF98	H1FX	KRAB	0.14	0.958679
A6NK75	Q96B97	ZNF98	SH3KBP1	KRAB	0.28	1.44109
A6NK75	Q9NVP1	ZNF98	DDX18	KRAB	0	0.737757
A6NK75	Q9NY12	ZNF98	GAR1	KRAB	0.98	2.55556
A6NK75	Q9ULW0	ZNF98	TPX2	KRAB	0	1.18389
A6NK75	Q9Y4W2	ZNF98	LAS1L	KRAB	0.33	1.38295
B2RXF5	O14867	ZBTB42	BACH1	BTB	1	4.23653
B2RXF5	O60341	ZBTB42	KDM1A	BTB	0.61	3.82038
B2RXF5	O75190	ZBTB42	DNAJB6	BTB	0.46	1.70106
B2RXF5	O75362	ZBTB42	ZNF217	BTB	0.82	2.07884
B2RXF5	O75489	ZBTB42	NDUFS3	BTB	0	0.78072
B2RXF5	O75694	ZBTB42	NUP155	BTB	0.01	0.762667
B2RXF5	P05204	ZBTB42	HMGN2	BTB	0	1.16793
B2RXF5	P07305	ZBTB42	H1F0	BTB	0	1.01978
B2RXF5	P14373	ZBTB42	TRIM27	BTB	0	1.15064
B2RXF5	P17029	ZBTB42	ZKSCAN1	BTB	0	1.15064
B2RXF5	P17096	ZBTB42	HMGA1	BTB	0	0.641923
B2RXF5	P17480	ZBTB42	UBTF	BTB	0.5	1.51256
B2RXF5	P17980	ZBTB42	PSMC3	BTB	0.02	0.962679
B2RXF5	P28482	ZBTB42	MAPK1	BTB	0.09	1.0977
B2RXF5	P29590	ZBTB42	PML	BTB	0.67	2.62808
B2RXF5	P35251	ZBTB42	RFC1	BTB	0	1.10693
B2RXF5	P49916	ZBTB42	LIG3	BTB	0.57	1.87629
B2RXF5	P51784	ZBTB42	USP11	BTB	0.48	1.54777
B2RXF5	P52739	ZBTB42	ZNF131	BTB	0	1.25603
B2RXF5	P56545	ZBTB42	CTBP2	BTB	1	9.27869
B2RXF5	P61962	ZBTB42	DCAF7	BTB	0.34	1.44535
B2RXF5	P62195	ZBTB42	PSMC5	BTB	0.01	1.50571
B2RXF5	P63167	ZBTB42	DYNLL1	BTB	0	0.497494
B2RXF5	P63244	ZBTB42	GNB2L1	BTB	0	0.233948
B2RXF5	Q07021	ZBTB42	C1QBP	BTB	0	0.249602
B2RXF5	Q13263	ZBTB42	TRIM28	BTB	0	0.806838
B2RXF5	Q13363	ZBTB42	CTBP1	BTB	1	9.22146
B2RXF5	Q13428	ZBTB42	TCOF1	BTB	0	0.46782
B2RXF5	Q13501	ZBTB42	SQSTM1	BTB	0.45	1.66412
B2RXF5	Q13547	ZBTB42	HDAC1	BTB	0	1.36629
B2RXF5	Q13601	ZBTB42	KRR1	BTB	0	1.33573
B2RXF5	Q13616	ZBTB42	CUL1	BTB	0.91	2.65648
B2RXF5	Q14160	ZBTB42	SCRIB	BTB	0	0.953073
B2RXF5	Q14566	ZBTB42	MCM6	BTB	0	0.498301
B2RXF5	Q14684	ZBTB42	RRP1B	BTB	0	0.685748
B2RXF5	Q15154	ZBTB42	PCM1	BTB	0.41	1.45241
B2RXF5	Q3KQU3	ZBTB42	MAP7D1	BTB	0.5	2.17118
B2RXF5	Q49A26	ZBTB42	GLYR1	BTB	0.25	1.22567
B2RXF5	Q5SY16	ZBTB42	NOL9	BTB	0.5	1.56975
B2RXF5	Q7Z6Z7	ZBTB42	HUWE1	BTB	0.99	8.39512
B2RXF5	Q86X55	ZBTB42	CARM1	BTB	0	0.933981
B2RXF5	Q8IZL8	ZBTB42	PELP1	BTB	0	0.908503
B2RXF5	Q8N163	ZBTB42	CCAR2	BTB	0.64	2.16105
B2RXF5	Q8N7H5	ZBTB42	PAF1	BTB	0.48	1.45302
B2RXF5	Q92522	ZBTB42	H1FX	BTB	0.28	1.26697
B2RXF5	Q92598	ZBTB42	HSPH1	BTB	0	0.89893
B2RXF5	Q92618	ZBTB42	ZNF516	BTB	1	10.4399
B2RXF5	Q92769	ZBTB42	HDAC2	BTB	0	0.91925
B2RXF5	Q96EY1	ZBTB42	DNAJA3	BTB	0.18	1.12369
B2RXF5	Q96PV6	ZBTB42	LENG8	BTB	0	1.10693
B2RXF5	Q96RE7	ZBTB42	NACC1	BTB	1	5.7917
B2RXF5	Q96T88	ZBTB42	Q96T88	BTB	0.41	1.44041
B2RXF5	Q99592	ZBTB42	ZBTB18	BTB	1	3.42739
B2RXF5	Q9BQ39	ZBTB42	DDX50	BTB	0	0.969282
B2RXF5	Q9BQ67	ZBTB42	GRWD1	BTB	0.07	0.881607
B2RXF5	Q9H2P0	ZBTB42	ADNP	BTB	0	1.10693
B2RXF5	Q9H5H4	ZBTB42	ZNF768	BTB	0	1.16211
B2RXF5	Q9H6F5	ZBTB42	CCDC86	BTB	0.09	1.56236
B2RXF5	Q9H6S0	ZBTB42	YTHDC2	BTB	0	1.21514
B2RXF5	Q9NQ55	ZBTB42	PPAN-P2RY11;PPAN	BTB	0	1.07627
B2RXF5	Q9NVP1	ZBTB42	DDX18	BTB	0	0.691101
B2RXF5	Q9P2K3	ZBTB42	RCOR3	BTB	0	1.22953
B2RXF5	Q9UBW7	ZBTB42	ZMYM2	BTB	0	1.09652
B2RXF5	Q9UKL0	ZBTB42	RCOR1	BTB	1	3.37229
B2RXF5	Q9UL42	ZBTB42	PNMA2	BTB	0.45	1.23101
B2RXF5	Q9UNQ2	ZBTB42	DIMT1	BTB	0.41	1.28707
B2RXF5	Q9Y2S7	ZBTB42	Q9Y2S7	BTB	0.82	1.59966
B2RXF5	Q9Y4W2	ZBTB42	LAS1L	BTB	0.23	1.10133
B2RXF5	Q9Y5Q8	ZBTB42	GTF3C5	BTB	0	1.15635
O14771	O00505	ZNF213	KPNA3	KRAB;SCAN	0.91	1.84853
O14771	O00629	ZNF213	KPNA4	KRAB;SCAN	0.46	1.43631
O14771	O43663	ZNF213	PRC1	KRAB;SCAN	0.46	1.32012
O14771	O95218	ZNF213	ZRANB2	KRAB;SCAN	0.91	1.8833
O14771	P17028	ZNF213	ZNF24	KRAB;SCAN	0	1.1612
O14771	P17096	ZNF213	HMGA1	KRAB;SCAN	0.12	1.61014
O14771	P17480	ZNF213	UBTF	KRAB;SCAN	1	3.56943
O14771	P35251	ZNF213	RFC1	KRAB;SCAN	0.48	1.35017
O14771	P49916	ZNF213	LIG3	KRAB;SCAN	0.95	3.33277
O14771	P57086	ZNF213	SCAND1	KRAB;SCAN	1	4.48296
O14771	P63244	ZNF213	GNB2L1	KRAB;SCAN	0	0.567172
O14771	P67775	ZNF213	PPP2CA	KRAB;SCAN	0.1	1.50669
O14771	Q02241	ZNF213	KIF23	KRAB;SCAN	0	1.21219
O14771	Q02880	ZNF213	TOP2B	KRAB;SCAN	1	9.88171
O14771	Q05516	ZNF213	ZBTB16	KRAB;SCAN	0.91	2.07884
O14771	Q07021	ZNF213	C1QBP	KRAB;SCAN	0	1.28915
O14771	Q13263	ZNF213	TRIM28	KRAB;SCAN	0	0.690053
O14771	Q13428	ZNF213	TCOF1	KRAB;SCAN	0	0.286054
O14771	Q13547	ZNF213	HDAC1	KRAB;SCAN	0	1.0735
O14771	Q14566	ZNF213	MCM6	KRAB;SCAN	0	0.362003
O14771	Q14684	ZNF213	RRP1B	KRAB;SCAN	0	0.616104
O14771	Q1ED39	ZNF213	KNOP1	KRAB;SCAN	0	1.0937
O14771	Q49A26	ZNF213	GLYR1	KRAB;SCAN	0.69	1.6711
O14771	Q8N7H5	ZNF213	PAF1	KRAB;SCAN	0.49	1.46653
O14771	Q8NFW8	ZNF213	CMAS	KRAB;SCAN	0	1.11362
O14771	Q8TBC5	ZNF213	ZSCAN18	KRAB;SCAN	0.98	2.31254
O14771	Q8WYP5	ZNF213	AHCTF1	KRAB;SCAN	0.48	1.62369
O14771	Q92522	ZNF213	H1FX	KRAB;SCAN	0.87	2.52822
O14771	Q96EY1	ZNF213	DNAJA3	KRAB;SCAN	0.81	1.65562
O14771	Q9BQ39	ZNF213	DDX50	KRAB;SCAN	0.66	3.40581
O14771	Q9BQ67	ZNF213	GRWD1	KRAB;SCAN	0.13	0.899601
O14771	Q9H6F5	ZNF213	CCDC86	KRAB;SCAN	1	3.91659
O14771	Q9H6S0	ZNF213	YTHDC2	KRAB;SCAN	0.6	2.30231
O14771	Q9H7D7	ZNF213	WDR26	KRAB;SCAN	0	0.903752
O14771	Q9NVP1	ZNF213	DDX18	KRAB;SCAN	0	1.08442
O14771	Q9NY12	ZNF213	GAR1	KRAB;SCAN	0.28	1.08769
O14771	Q9ULW0	ZNF213	TPX2	KRAB;SCAN	0	1.16674
O14771	Q9UMX1	ZNF213	SUFU	KRAB;SCAN	1	4.12934
O14771	Q9Y2R4	ZNF213	DDX52	KRAB;SCAN	0	1.21219
O14978	P07305	ZNF263	H1F0	KRAB;SCAN	0.49	1.54996
O14978	P17028	ZNF263	ZNF24	KRAB;SCAN	0.48	1.69571
O14978	P17096	ZNF263	HMGA1	KRAB;SCAN	0	0.609133
O14978	P57086	ZNF263	SCAND1	KRAB;SCAN	1	5.5644
O14978	P63167	ZNF263	DYNLL1	KRAB;SCAN	0	0.616655
O14978	P63244	ZNF263	GNB2L1	KRAB;SCAN	0	0.194531
O14978	Q02880	ZNF263	TOP2B	KRAB;SCAN	0	0.938434
O14978	Q07021	ZNF263	C1QBP	KRAB;SCAN	0	0.328814
O14978	Q13263	ZNF263	TRIM28	KRAB;SCAN	0	1.24788
O14978	Q49A26	ZNF263	GLYR1	KRAB;SCAN	0	1.31054
O14978	Q8TBC5	ZNF263	ZSCAN18	KRAB;SCAN	1	2.85613
O14978	Q92522	ZNF263	H1FX	KRAB;SCAN	0.86	2.63378
O14978	Q9H6F5	ZNF263	CCDC86	KRAB;SCAN	0.33	1.63314
O43296	O00629	ZNF264	KPNA4	KRAB	0	0.970548
O43296	O75190	ZNF264	DNAJB6	KRAB	0.17	0.955973
O43296	O75489	ZNF264	NDUFS3	KRAB	0	0.742975
O43296	O95218	ZNF264	ZRANB2	KRAB	0.95	2.09077
O43296	P02545	ZNF264	LMNA	KRAB	0	0.57658
O43296	P07858	ZNF264	CTSB	KRAB	0.28	1.19191
O43296	P17096	ZNF264	HMGA1	KRAB	0	0.435635
O43296	P17480	ZNF264	UBTF	KRAB	1	6.11576
O43296	P35251	ZNF264	RFC1	KRAB	0.48	1.31975
O43296	P38432	ZNF264	COIL	KRAB	0.5	1.9246
O43296	P49916	ZNF264	LIG3	KRAB	0.49	2.1284
O43296	P61962	ZNF264	DCAF7	KRAB	0	0.661804
O43296	P63167	ZNF264	DYNLL1	KRAB	0.02	0.75403
O43296	P63244	ZNF264	GNB2L1	KRAB	0	0.531535
O43296	Q02880	ZNF264	TOP2B	KRAB	0	0.97084
O43296	Q07021	ZNF264	C1QBP	KRAB	0	0.368192
O43296	Q13263	ZNF264	TRIM28	KRAB	1	3.37938
O43296	Q13363	ZNF264	CTBP1	KRAB	0.46	1.26621
O43296	Q13428	ZNF264	TCOF1	KRAB	0.68	1.72648
O43296	Q14684	ZNF264	RRP1B	KRAB	0	0.630051
O43296	Q49A26	ZNF264	GLYR1	KRAB	0	0.984465
O43296	Q8IZL8	ZNF264	PELP1	KRAB	0	0.875643
O43296	Q8N7H5	ZNF264	PAF1	KRAB	0.46	1.2051
O43296	Q96EY1	ZNF264	DNAJA3	KRAB	0	0.751103
O43296	Q96RT1	ZNF264	ERBB2IP	KRAB	0.46	1.75503
O43296	Q96T88	ZNF264	Q96T88	KRAB	0	0.984465
O43296	Q9GZS3	ZNF264	WDR61	KRAB	0	0.717106
O43296	Q9NVP1	ZNF264	DDX18	KRAB	0	0.370374
O43296	Q9NY12	ZNF264	GAR1	KRAB	0.28	1.03096
O43296	Q9UL42	ZNF264	PNMA2	KRAB	1	2.67018
O43296	Q9ULW0	ZNF264	TPX2	KRAB	0	1.14927
O43296	Q9UNQ2	ZNF264	DIMT1	KRAB	1	3.68779
O43296	Q9Y2R4	ZNF264	DDX52	KRAB	0.5	1.98267
O43296	Q9Y4W2	ZNF264	LAS1L	KRAB	0.61	1.51568
O43829	O95218	ZBTB14	ZRANB2	BTB	0	1.15044
O43829	P02545	ZBTB14	LMNA	BTB	0	0.631438
O43829	P07305	ZBTB14	H1F0	BTB	0.5	1.90433
O43829	P09132	ZBTB14	SRP19	BTB	1	3.39769
O43829	P12270	ZBTB14	TPR	BTB	0	1.15145
O43829	P13807	ZBTB14	GYS1	BTB	0	1.07946
O43829	P17096	ZBTB14	HMGA1	BTB	0	0.491749
O43829	P28482	ZBTB14	MAPK1	BTB	0.96	2.4534
O43829	P57078	ZBTB14	RIPK4	BTB	0	1.09392
O43829	P61962	ZBTB14	DCAF7	BTB	0	0.71639
O43829	P63167	ZBTB14	DYNLL1	BTB	0	0.730267
O43829	P63244	ZBTB14	GNB2L1	BTB	0	0.567971
O43829	Q07021	ZBTB14	C1QBP	BTB	0	0.528285
O43829	Q13263	ZBTB14	TRIM28	BTB	0	0.782252
O43829	Q13428	ZBTB14	TCOF1	BTB	0	0.838362
O43829	Q13554	ZBTB14	CAMK2B	BTB	0	1.22525
O43829	Q13555	ZBTB14	CAMK2G	BTB	0.45	1.51585
O43829	Q15072	ZBTB14	ZNF146	BTB	0	1.12404
O43829	Q86X55	ZBTB14	CARM1	BTB	0	0.946045
O43829	Q92522	ZBTB14	H1FX	BTB	0.35	1.41608
O43829	Q92598	ZBTB14	HSPH1	BTB	0	0.564498
O43829	Q96EY1	ZBTB14	DNAJA3	BTB	0	0.803322
O43829	Q9BQ67	ZBTB14	GRWD1	BTB	0	0.742448
O43829	Q9NVP1	ZBTB14	DDX18	BTB	0	0.421291
O43829	Q9NY12	ZBTB14	GAR1	BTB	0.18	1.08816
O43829	Q9UGI8	ZBTB14	TES	BTB	1	4.24752
O43829	Q9UNQ2	ZBTB14	DIMT1	BTB	0.41	1.29732
O60765	P12270	ZNF354A	TPR	KRAB	0	1.14495
O60765	P17096	ZNF354A	HMGA1	KRAB	0	1.07113
O60765	P57078	ZNF354A	RIPK4	KRAB	0.69	1.97614
O60765	P63167	ZNF354A	DYNLL1	KRAB	0.02	1.40674
O60765	P63244	ZNF354A	GNB2L1	KRAB	0	0.436186
O60765	Q07021	ZNF354A	C1QBP	KRAB	0	0.652669
O60765	Q13263	ZNF354A	TRIM28	KRAB	1	39.1048
O60765	Q13428	ZNF354A	TCOF1	KRAB	0	1.30759
O60765	Q14566	ZNF354A	MCM6	KRAB	0	0.850649
O75467	O75694	ZNF324	NUP155	KRAB	0	1.14708
O75467	P57078	ZNF324	RIPK4	KRAB	0	1.2476
O75467	P63167	ZNF324	DYNLL1	KRAB	0	1.32375
O75467	P63244	ZNF324	GNB2L1	KRAB	0	0.990107
O75467	Q02241	ZNF324	KIF23	KRAB	0	1.23306
O75467	Q07021	ZNF324	C1QBP	KRAB	0	0.738491
O75467	Q13263	ZNF324	TRIM28	KRAB	1	72.0353
O75626	O43663	PRDM1	PRC1	SET	1	3.73291
O75626	O75489	PRDM1	NDUFS3	SET	0	0.72784
O75626	O75694	PRDM1	NUP155	SET	0.85	4.3566
O75626	P02545	PRDM1	LMNA	SET	0	0.561223
O75626	P05204	PRDM1	HMGN2	SET	0	1.15054
O75626	P07305	PRDM1	H1F0	SET	0.48	1.60985
O75626	P12270	PRDM1	TPR	SET	0	0.893659
O75626	P17096	PRDM1	HMGA1	SET	0.05	1.08361
O75626	P17480	PRDM1	UBTF	SET	0	1.02972
O75626	P18887	PRDM1	XRCC1	SET	0	1.15054
O75626	P28482	PRDM1	MAPK1	SET	0.32	1.32658
O75626	P49916	PRDM1	LIG3	SET	0.87	2.91055
O75626	P52294	PRDM1	KPNA1	SET	1	9.01101
O75626	P56545	PRDM1	CTBP2	SET	0.35	1.73189
O75626	P61962	PRDM1	DCAF7	SET	1	8.19697
O75626	P62993	PRDM1	GRB2	SET	0	1.10515
O75626	P63167	PRDM1	DYNLL1	SET	0	0.541089
O75626	P63244	PRDM1	GNB2L1	SET	0	0.412257
O75626	P67775	PRDM1	PPP2CA	SET	0.48	1.79629
O75626	Q02241	PRDM1	KIF23	SET	0.5	1.55527
O75626	Q02880	PRDM1	TOP2B	SET	0	0.786191
O75626	Q04724	PRDM1	TLE1	SET	0	1.26154
O75626	Q07021	PRDM1	C1QBP	SET	0	0.568414
O75626	Q09472	PRDM1	EP300	SET	0	1.26154
O75626	Q12769	PRDM1	NUP160	SET	0.09	0.838864
O75626	Q13263	PRDM1	TRIM28	SET	0	0.341666
O75626	Q13363	PRDM1	CTBP1	SET	0.98	2.35448
O75626	Q13428	PRDM1	TCOF1	SET	0	0.363332
O75626	Q13547	PRDM1	HDAC1	SET	0	0.830079
O75626	Q13616	PRDM1	CUL1	SET	0	1.15054
O75626	Q14160	PRDM1	SCRIB	SET	0.41	1.1036
O75626	Q14566	PRDM1	MCM6	SET	0	1.15728
O75626	Q14684	PRDM1	RRP1B	SET	0.01	1.47761
O75626	Q1ED39	PRDM1	KNOP1	SET	0.95	1.956
O75626	Q49A26	PRDM1	GLYR1	SET	0.98	2.62782
O75626	Q86X55	PRDM1	CARM1	SET	0.8	2.02342
O75626	Q8N163	PRDM1	CCAR2	SET	0	0.464247
O75626	Q8WYP5	PRDM1	AHCTF1	SET	0	1.11142
O75626	Q92522	PRDM1	H1FX	SET	0.61	1.72179
O75626	Q92598	PRDM1	HSPH1	SET	0.17	1.44407
O75626	Q96EE3	PRDM1	SEH1L	SET	0.07	1.7307
O75626	Q96EY1	PRDM1	DNAJA3	SET	0.43	1.20508
O75626	Q9BQ67	PRDM1	GRWD1	SET	0	0.672902
O75626	Q9H6F5	PRDM1	CCDC86	SET	0	1.06901
O75626	Q9NQ55	PRDM1	PPAN-P2RY11;PPAN	SET	0	1.0462
O75626	Q9NVP1	PRDM1	DDX18	SET	0.73	2.04459
O75626	Q9NWT1	PRDM1	PAK1IP1	SET	0	1.25348
O75626	Q9NY12	PRDM1	GAR1	SET	0.65	1.72492
O75626	Q9UGI8	PRDM1	TES	SET	0	1.09896
O75626	Q9ULT8	PRDM1	HECTD1	SET	0.45	1.49115
O75626	Q9ULW0	PRDM1	TPX2	SET	0.9	2.11571
O75626	Q9Y2R4	PRDM1	DDX52	SET	0.41	1.15171
O75626	Q9Y2S7	PRDM1	Q9Y2S7	SET	0.9	1.73189
O75820	A6NFI3	ZNF189	A6NFI3	KRAB	0.41	1.30047
O75820	A8MTY0	ZNF189	ZNF724P	KRAB	0.48	1.55856
O75820	O15350	ZNF189	TP73	KRAB	0	1.3904
O75820	O60341	ZNF189	KDM1A	KRAB	0.59	3.20619
O75820	O75190	ZNF189	DNAJB6	KRAB	0.56	1.64283
O75820	O75489	ZNF189	NDUFS3	KRAB	0	0.675227
O75820	O75694	ZNF189	NUP155	KRAB	0.01	0.743997
O75820	P02545	ZNF189	LMNA	KRAB	0	0.617526
O75820	P07199	ZNF189	CENPB	KRAB	0	1.12574
O75820	P07305	ZNF189	H1F0	KRAB	0.9	1.74677
O75820	P14373	ZNF189	TRIM27	KRAB	0	1.34393
O75820	P17029	ZNF189	ZKSCAN1	KRAB	0.99	2.75669
O75820	P17096	ZNF189	HMGA1	KRAB	0	0.631433
O75820	P17480	ZNF189	UBTF	KRAB	1	2.26399
O75820	P17980	ZNF189	PSMC3	KRAB	0.02	0.982081
O75820	P18887	ZNF189	XRCC1	KRAB	0.45	1.61171
O75820	P28482	ZNF189	MAPK1	KRAB	0	0.80554
O75820	P29590	ZNF189	PML	KRAB	0	0.989437
O75820	P35251	ZNF189	RFC1	KRAB	0	1.05221
O75820	P49916	ZNF189	LIG3	KRAB	0.73	2.10311
O75820	P56545	ZNF189	CTBP2	KRAB	0.06	1.27308
O75820	P61962	ZNF189	DCAF7	KRAB	0.28	1.22308
O75820	P62195	ZNF189	PSMC5	KRAB	0.01	1.40979
O75820	P63167	ZNF189	DYNLL1	KRAB	0	0.568568
O75820	P63244	ZNF189	GNB2L1	KRAB	0	0.148737
O75820	P82933	ZNF189	MRPS9	KRAB	0	1.15478
O75820	Q02241	ZNF189	KIF23	KRAB	0.95	1.67981
O75820	Q02880	ZNF189	TOP2B	KRAB	0	1.04737
O75820	Q07021	ZNF189	C1QBP	KRAB	0	0.194307
O75820	Q12769	ZNF189	NUP160	KRAB	0	0.638816
O75820	Q13263	ZNF189	TRIM28	KRAB	0.26	1.38358
O75820	Q13363	ZNF189	CTBP1	KRAB	0	1.00139
O75820	Q13428	ZNF189	TCOF1	KRAB	0	0.350903
O75820	Q13501	ZNF189	SQSTM1	KRAB	0	1.37143
O75820	Q13547	ZNF189	HDAC1	KRAB	0	1.03396
O75820	Q13601	ZNF189	KRR1	KRAB	0	1.26768
O75820	Q14160	ZNF189	SCRIB	KRAB	0	0.865512
O75820	Q14566	ZNF189	MCM6	KRAB	0	0.672168
O75820	Q14684	ZNF189	RRP1B	KRAB	0	0.818982
O75820	Q14839	ZNF189	CHD4	KRAB	0.3	1.57427
O75820	Q15072	ZNF189	ZNF146	KRAB	0	1.06573
O75820	Q1ED39	ZNF189	KNOP1	KRAB	0.45	1.24415
O75820	Q3KQU3	ZNF189	MAP7D1	KRAB	0	1.38085
O75820	Q49A26	ZNF189	GLYR1	KRAB	0	0.933732
O75820	Q5SY16	ZNF189	NOL9	KRAB	0.45	1.48978
O75820	Q7Z3K3	ZNF189	POGZ	KRAB	0.41	1.48267
O75820	Q7Z5L9	ZNF189	IRF2BP2	KRAB	0	1.1468
O75820	Q7Z6Z7	ZNF189	HUWE1	KRAB	0.26	1.36865
O75820	Q86X55	ZNF189	CARM1	KRAB	0	0.843502
O75820	Q8IZL8	ZNF189	PELP1	KRAB	0.07	1.33355
O75820	Q8N163	ZNF189	CCAR2	KRAB	0.11	1.29985
O75820	Q8N7H5	ZNF189	PAF1	KRAB	0.82	1.54617
O75820	Q8WVC0	ZNF189	LEO1	KRAB	0	1.05893
O75820	Q8WYP5	ZNF189	AHCTF1	KRAB	0	1.08668
O75820	Q92522	ZNF189	H1FX	KRAB	0.21	0.932298
O75820	Q92598	ZNF189	HSPH1	KRAB	0	0.920286
O75820	Q96EY1	ZNF189	DNAJA3	KRAB	0	0.828781
O75820	Q96T88	ZNF189	Q96T88	KRAB	0.98	3.31384
O75820	Q99627	ZNF189	COPS8	KRAB	0	1.2229
O75820	Q9BQ39	ZNF189	DDX50	KRAB	0.01	1.13795
O75820	Q9BQ67	ZNF189	GRWD1	KRAB	0.07	0.883
O75820	Q9H2P0	ZNF189	ADNP	KRAB	0.33	1.72274
O75820	Q9H6F5	ZNF189	CCDC86	KRAB	0	1.25974
O75820	Q9H6S0	ZNF189	YTHDC2	KRAB	0.14	1.51174
O75820	Q9H7D7	ZNF189	WDR26	KRAB	0	0.794983
O75820	Q9NQ55	ZNF189	PPAN-P2RY11;PPAN	KRAB	0	1.01363
O75820	Q9NVP1	ZNF189	DDX18	KRAB	0.01	0.970764
O75820	Q9NXF1	ZNF189	TEX10	KRAB	0	1.17942
O75820	Q9P2K3	ZNF189	RCOR3	KRAB	0.41	1.47181
O75820	Q9UBW7	ZNF189	ZMYM2	KRAB	1	9.42597
O75820	Q9UKL0	ZNF189	RCOR1	KRAB	0.41	1.76851
O75820	Q9UL42	ZNF189	PNMA2	KRAB	0.95	1.73688
O75820	Q9ULX6	ZNF189	AKAP8L	KRAB	0.72	2.09571
O75820	Q9UN30	ZNF189	SCML1	KRAB	1	2.60028
O75820	Q9Y2S7	ZNF189	Q9Y2S7	KRAB	0	1.08328
O75820	Q9Y4W2	ZNF189	LAS1L	KRAB	0.46	1.37558
O75820	Q9Y5Q8	ZNF189	GTF3C5	KRAB	0.45	1.35297
O75840	O00629	KLF7	KPNA4	NONE	0	1.09643
O75840	O43663	KLF7	PRC1	NONE	0.5	1.65173
O75840	O75190	KLF7	DNAJB6	NONE	0.89	2.2038
O75840	O75489	KLF7	NDUFS3	NONE	0	0.658126
O75840	O75840	KLF7	KLF7	NONE	0	1
O75840	P02545	KLF7	LMNA	NONE	0	0.807086
O75840	P07858	KLF7	CTSB	NONE	0	0.756329
O75840	P17096	KLF7	HMGA1	NONE	0	0.543499
O75840	P29590	KLF7	PML	NONE	0	0.977463
O75840	P35251	KLF7	RFC1	NONE	0	1.0423
O75840	P49916	KLF7	LIG3	NONE	0.48	2.2038
O75840	P51784	KLF7	USP11	NONE	1	22.467
O75840	P51858	KLF7	HDGF	NONE	0.01	1.22314
O75840	P56545	KLF7	CTBP2	NONE	0.06	1.25248
O75840	P62195	KLF7	PSMC5	NONE	0	0.977463
O75840	P63167	KLF7	DYNLL1	NONE	0	0.384411
O75840	P63244	KLF7	GNB2L1	NONE	0	0.544398
O75840	Q02241	KLF7	KIF23	NONE	0.45	1.08395
O75840	Q02880	KLF7	TOP2B	NONE	0	0.870877
O75840	Q07021	KLF7	C1QBP	NONE	0	0.222213
O75840	Q13263	KLF7	TRIM28	NONE	0	1.11289
O75840	Q13363	KLF7	CTBP1	NONE	0.5	1.62052
O75840	Q13428	KLF7	TCOF1	NONE	0	0.576236
O75840	Q13547	KLF7	HDAC1	NONE	0	0.61438
O75840	Q13616	KLF7	CUL1	NONE	0.98	3.035
O75840	Q14160	KLF7	SCRIB	NONE	0	0.850486
O75840	Q14566	KLF7	MCM6	NONE	0	0.313976
O75840	Q14684	KLF7	RRP1B	NONE	0	0.383503
O75840	Q14839	KLF7	CHD4	NONE	0.04	0.818494
O75840	Q49A26	KLF7	GLYR1	NONE	0.5	1.89758
O75840	Q7Z6Z7	KLF7	HUWE1	NONE	0.9	4.43465
O75840	Q8N163	KLF7	CCAR2	NONE	0	0.401092
O75840	Q92598	KLF7	HSPH1	NONE	0.42	1.52886
O75840	Q93009	KLF7	USP7	NONE	0	0.728285
O75840	Q96EY1	KLF7	DNAJA3	NONE	0.18	0.949655
O75840	Q9BQ39	KLF7	DDX50	NONE	0	0.678005
O75840	Q9BQ67	KLF7	GRWD1	NONE	0.18	0.858606
O75840	Q9NVP1	KLF7	DDX18	NONE	0	0.562155
O75840	Q9NY12	KLF7	GAR1	NONE	0.18	1.0988
O75840	Q9UL42	KLF7	PNMA2	NONE	0	0.925639
O75840	Q9ULW0	KLF7	TPX2	NONE	0	1.35349
O75840	Q9ULX6	KLF7	AKAP8L	NONE	0	0.759988
O75840	Q9UNQ2	KLF7	DIMT1	NONE	0.5	2.65503
O75840	Q9Y2S7	KLF7	Q9Y2S7	NONE	0.48	1.25248
O75840	Q9Y4W2	KLF7	LAS1L	NONE	0.39	1.20221
O95863	O00629	SNAI1	KPNA4	SNAG	0	0.988646
O95863	P07305	SNAI1	H1F0	SNAG	0.46	1.44055
O95863	P17096	SNAI1	HMGA1	SNAG	0.01	1.10795
O95863	P17480	SNAI1	UBTF	SNAG	1	3.06892
O95863	P18887	SNAI1	XRCC1	SNAG	0	1.41105
O95863	P49916	SNAI1	LIG3	SNAG	0.9	2.71068
O95863	P63167	SNAI1	DYNLL1	SNAG	0	0.58746
O95863	P63244	SNAI1	GNB2L1	SNAG	0	0.197701
O95863	Q02241	SNAI1	KIF23	SNAG	0	1.18813
O95863	Q02880	SNAI1	TOP2B	SNAG	0	1.17464
O95863	Q07021	SNAI1	C1QBP	SNAG	0	0.502147
O95863	Q13263	SNAI1	TRIM28	SNAG	0	0.328056
O95863	Q13428	SNAI1	TCOF1	SNAG	0.84	1.93986
O95863	Q13601	SNAI1	KRR1	SNAG	0	1.328
O95863	Q14684	SNAI1	RRP1B	SNAG	0.99	3.17238
O95863	Q1ED39	SNAI1	KNOP1	SNAG	0.98	2.45521
O95863	Q49A26	SNAI1	GLYR1	SNAG	0.35	1.21479
O95863	Q86SE8	SNAI1	NPM2	SNAG	1	5.58508
O95863	Q8N7H5	SNAI1	PAF1	SNAG	0.46	1.22579
O95863	Q8N9T8	SNAI1	KRI1	SNAG	0	1.2079
O95863	Q8WYP5	SNAI1	AHCTF1	SNAG	0	1.12854
O95863	Q92522	SNAI1	H1FX	SNAG	0.84	1.86712
O95863	Q96EY1	SNAI1	DNAJA3	SNAG	0.41	1.10527
O95863	Q9H6F5	SNAI1	CCDC86	SNAG	0.17	1.32152
O95863	Q9NQ55	SNAI1	PPAN-P2RY11;PPAN	SNAG	0.4	1.75041
O95863	Q9NVP1	SNAI1	DDX18	SNAG	1	2.66925
O95863	Q9NY12	SNAI1	GAR1	SNAG	0.86	1.79966
O95863	Q9Y2R4	SNAI1	DDX52	SNAG	1	3.26977
P10073	O00505	ZSCAN22	KPNA3	SCAN	0.91	1.89316
P10073	O00629	ZSCAN22	KPNA4	SCAN	0.95	1.95008
P10073	O14936	ZSCAN22	CASK	SCAN	0	1.21986
P10073	O43242	ZSCAN22	PSMD3	SCAN	0.77	3.97383
P10073	O43663	ZSCAN22	PRC1	SCAN	1	3.98509
P10073	O75190	ZSCAN22	DNAJB6	SCAN	0	1.096
P10073	O75489	ZSCAN22	NDUFS3	SCAN	0.18	1.59769
P10073	O75694	ZSCAN22	NUP155	SCAN	0	0.719703
P10073	P05204	ZSCAN22	HMGN2	SCAN	1	4.22967
P10073	P07305	ZSCAN22	H1F0	SCAN	0.99	2.21155
P10073	P07858	ZSCAN22	CTSB	SCAN	0.71	1.74837
P10073	P09132	ZSCAN22	SRP19	SCAN	0	1.18723
P10073	P17028	ZSCAN22	ZNF24	SCAN	1	9.72452
P10073	P17029	ZSCAN22	ZKSCAN1	SCAN	1	4.6821
P10073	P17096	ZSCAN22	HMGA1	SCAN	0.95	2.88948
P10073	P17480	ZSCAN22	UBTF	SCAN	1	12.3926
P10073	P17980	ZSCAN22	PSMC3	SCAN	1	4.78334
P10073	P18887	ZSCAN22	XRCC1	SCAN	0.5	4.22967
P10073	P35251	ZSCAN22	RFC1	SCAN	1	3.3297
P10073	P49916	ZSCAN22	LIG3	SCAN	1	10.313
P10073	P51784	ZSCAN22	USP11	SCAN	0.46	1.43872
P10073	P52294	ZSCAN22	KPNA1	SCAN	0	1.23932
P10073	P52739	ZSCAN22	ZNF131	SCAN	0	1.25942
P10073	P57086	ZSCAN22	SCAND1	SCAN	1	7.71125
P10073	P61962	ZSCAN22	DCAF7	SCAN	0.84	2.13025
P10073	P62195	ZSCAN22	PSMC5	SCAN	0.72	3.2115
P10073	P63167	ZSCAN22	DYNLL1	SCAN	0.02	0.960332
P10073	P63244	ZSCAN22	GNB2L1	SCAN	0	1.31542
P10073	Q02241	ZSCAN22	KIF23	SCAN	1	2.8267
P10073	Q02880	ZSCAN22	TOP2B	SCAN	1	18.2058
P10073	Q07021	ZSCAN22	C1QBP	SCAN	0	0.942422
P10073	Q12769	ZSCAN22	NUP160	SCAN	0	1.00801
P10073	Q13263	ZSCAN22	TRIM28	SCAN	1	3.62288
P10073	Q13363	ZSCAN22	CTBP1	SCAN	0	1.11082
P10073	Q13428	ZSCAN22	TCOF1	SCAN	0	0.588482
P10073	Q13601	ZSCAN22	KRR1	SCAN	0.28	1.62337
P10073	Q14160	ZSCAN22	SCRIB	SCAN	0	1.23224
P10073	Q14566	ZSCAN22	MCM6	SCAN	0	0.517647
P10073	Q14592	ZSCAN22	ZNF460	SCAN	0.46	1.49206
P10073	Q14684	ZSCAN22	RRP1B	SCAN	0.65	3.81515
P10073	Q14839	ZSCAN22	CHD4	SCAN	0.62	3.11753
P10073	Q15072	ZSCAN22	ZNF146	SCAN	0.46	1.64143
P10073	Q15776	ZSCAN22	ZKSCAN8	SCAN	1	3.14483
P10073	Q1ED39	ZSCAN22	KNOP1	SCAN	0	1.12694
P10073	Q49A26	ZSCAN22	GLYR1	SCAN	1	5.13768
P10073	Q5SY16	ZSCAN22	NOL9	SCAN	1	4.04354
P10073	Q6P1J9	ZSCAN22	CDC73	SCAN	0	1.17377
P10073	Q6PD62	ZSCAN22	CTR9	SCAN	0	1.41775
P10073	Q6ZN55	ZSCAN22	ZNF574	SCAN	1	7.71468
P10073	Q7Z6Z7	ZSCAN22	HUWE1	SCAN	1	12.6521
P10073	Q8IZL8	ZSCAN22	PELP1	SCAN	0.88	3.05532
P10073	Q8N7H5	ZSCAN22	PAF1	SCAN	0.96	2.43937
P10073	Q8N9T8	ZSCAN22	KRI1	SCAN	0	1.22467
P10073	Q8NFW8	ZSCAN22	CMAS	SCAN	1	4.05842
P10073	Q8TBC5	ZSCAN22	ZSCAN18	SCAN	1	18.8396
P10073	Q8WYP5	ZSCAN22	AHCTF1	SCAN	1	2.64974
P10073	Q92522	ZSCAN22	H1FX	SCAN	1	5.68845
P10073	Q92621	ZSCAN22	NUP205	SCAN	0	1.18271
P10073	Q93009	ZSCAN22	USP7	SCAN	0.18	1.11878
P10073	Q96EY1	ZSCAN22	DNAJA3	SCAN	1	3.64638
P10073	Q96GC6	ZSCAN22	ZNF274	SCAN	1	6.07485
P10073	Q96T88	ZSCAN22	Q96T88	SCAN	0	1.06513
P10073	Q9BQ39	ZSCAN22	DDX50	SCAN	0.28	2.19076
P10073	Q9BQ67	ZSCAN22	GRWD1	SCAN	0.69	1.85141
P10073	Q9GZS3	ZSCAN22	WDR61	SCAN	0.45	1.73299
P10073	Q9H6F5	ZSCAN22	CCDC86	SCAN	0.93	3.06424
P10073	Q9H6S0	ZSCAN22	YTHDC2	SCAN	0.23	1.73201
P10073	Q9H7D7	ZSCAN22	WDR26	SCAN	0.4	1.57636
P10073	Q9NQ55	ZSCAN22	PPAN-P2RY11;PPAN	SCAN	1	6.10967
P10073	Q9NRL2	ZSCAN22	BAZ1A	SCAN	1	3.18044
P10073	Q9NVP1	ZSCAN22	DDX18	SCAN	1	5.9925
P10073	Q9NWS9	ZSCAN22	ZNF446	SCAN	0.99	2.60761
P10073	Q9NWT1	ZSCAN22	PAK1IP1	SCAN	0.5	2.86456
P10073	Q9NXF1	ZSCAN22	TEX10	SCAN	0.48	1.47898
P10073	Q9NY12	ZSCAN22	GAR1	SCAN	0.78	2.37968
P10073	Q9UL42	ZSCAN22	PNMA2	SCAN	1	2.20395
P10073	Q9ULW0	ZSCAN22	TPX2	SCAN	0	1.18723
P10073	Q9ULX6	ZSCAN22	AKAP8L	SCAN	0.17	1.35091
P10073	Q9UN30	ZSCAN22	SCML1	SCAN	0.96	1.86539
P10073	Q9UNQ2	ZSCAN22	DIMT1	SCAN	0	1.10687
P10073	Q9Y2R4	ZSCAN22	DDX52	SCAN	1	6.38574
P10073	Q9Y2S7	ZSCAN22	Q9Y2S7	SCAN	0.46	1.25691
P10073	Q9Y4W2	ZSCAN22	LAS1L	SCAN	1	3.76802
P10073	Q9Y5Q8	ZSCAN22	GTF3C5	SCAN	0.48	1.43394
P10073	Q9Y6V7	ZSCAN22	DDX49	SCAN	0.48	1.49661
P10074	O00505	ZBTB48	KPNA3	BTB	0	1.11145
P10074	O00629	ZBTB48	KPNA4	BTB	0	0.979221
P10074	O14641	ZBTB48	DVL2	BTB	1	4.09557
P10074	O43663	ZBTB48	PRC1	BTB	1	55.6957
P10074	O43813	ZBTB48	LANCL1	BTB	0.96	1.92998
P10074	O75489	ZBTB48	NDUFS3	BTB	0.24	1.23571
P10074	O75694	ZBTB48	NUP155	BTB	1	5.20473
P10074	P07305	ZBTB48	H1F0	BTB	0	1.00215
P10074	P07858	ZBTB48	CTSB	BTB	0.43	1.3874
P10074	P12270	ZBTB48	TPR	BTB	0	0.916329
P10074	P13807	ZBTB48	GYS1	BTB	0.34	1.28101
P10074	P17096	ZBTB48	HMGA1	BTB	0	0.447703
P10074	P17252	ZBTB48	PRKCA	BTB	0.46	1.5125
P10074	P17480	ZBTB48	UBTF	BTB	1	9.04695
P10074	P17980	ZBTB48	PSMC3	BTB	0.39	1.74749
P10074	P18887	ZBTB48	XRCC1	BTB	0.48	1.40595
P10074	P28482	ZBTB48	MAPK1	BTB	0.99	2.48326
P10074	P35251	ZBTB48	RFC1	BTB	0.96	1.79181
P10074	P49916	ZBTB48	LIG3	BTB	0.98	4.5379
P10074	P51610	ZBTB48	HCFC1	BTB	0	1.20535
P10074	P51784	ZBTB48	USP11	BTB	0.46	1.12057
P10074	P56545	ZBTB48	CTBP2	BTB	0.11	1.36402
P10074	P57078	ZBTB48	RIPK4	BTB	0	1.07246
P10074	P61962	ZBTB48	DCAF7	BTB	0.34	1.24656
P10074	P62993	ZBTB48	GRB2	BTB	0	1.35457
P10074	P63167	ZBTB48	DYNLL1	BTB	0.13	1.07323
P10074	P63244	ZBTB48	GNB2L1	BTB	0	0.641665
P10074	P67775	ZBTB48	PPP2CA	BTB	0.68	1.9067
P10074	Q02241	ZBTB48	KIF23	BTB	1	2.82541
P10074	Q02880	ZBTB48	TOP2B	BTB	0.14	2.19193
P10074	Q07021	ZBTB48	C1QBP	BTB	0	0.398486
P10074	Q08209	ZBTB48	PPP3CA	BTB	0.5	2.32101
P10074	Q12769	ZBTB48	NUP160	BTB	0.26	1.17757
P10074	Q13263	ZBTB48	TRIM28	BTB	0	1.09788
P10074	Q13428	ZBTB48	TCOF1	BTB	0.57	1.82759
P10074	Q13547	ZBTB48	HDAC1	BTB	0	1.31707
P10074	Q13616	ZBTB48	CUL1	BTB	0	1.40595
P10074	Q13618	ZBTB48	CUL3	BTB	0	1.42136
P10074	Q14160	ZBTB48	SCRIB	BTB	0.96	2.12052
P10074	Q14566	ZBTB48	MCM6	BTB	0	0.747082
P10074	Q14684	ZBTB48	RRP1B	BTB	0	0.898831
P10074	Q14839	ZBTB48	CHD4	BTB	0.08	0.93485
P10074	Q49A26	ZBTB48	GLYR1	BTB	0	0.99285
P10074	Q5H9R7	ZBTB48	PPP6R3	BTB	0.48	1.23234
P10074	Q7Z3K3	ZBTB48	POGZ	BTB	1	10.9249
P10074	Q7Z6Z7	ZBTB48	HUWE1	BTB	0.5	1.69741
P10074	Q86X55	ZBTB48	CARM1	BTB	0.86	1.8815
P10074	Q8IZL8	ZBTB48	PELP1	BTB	0.15	1.45058
P10074	Q8N7H5	ZBTB48	PAF1	BTB	0.49	1.4279
P10074	Q8NFW8	ZBTB48	CMAS	BTB	0.49	1.55934
P10074	Q8TEM1	ZBTB48	NUP210	BTB	0	1.05138
P10074	Q92522	ZBTB48	H1FX	BTB	0.12	0.791741
P10074	Q92575	ZBTB48	UBXN4	BTB	1	3.6753
P10074	Q92598	ZBTB48	HSPH1	BTB	0.02	1.29953
P10074	Q92769	ZBTB48	HDAC2	BTB	0	1.08769
P10074	Q93009	ZBTB48	USP7	BTB	0.97	3.26402
P10074	Q96EY1	ZBTB48	DNAJA3	BTB	0.56	1.24893
P10074	Q96JM3	ZBTB48	CHAMP1	BTB	0.48	1.67959
P10074	Q96T88	ZBTB48	Q96T88	BTB	0.46	1.20375
P10074	Q9BQ39	ZBTB48	DDX50	BTB	0.17	1.59575
P10074	Q9BQ67	ZBTB48	GRWD1	BTB	0.89	1.89063
P10074	Q9C0B1	ZBTB48	FTO	BTB	1	5.04566
P10074	Q9GZS3	ZBTB48	WDR61	BTB	0.45	1.50334
P10074	Q9H7D7	ZBTB48	WDR26	BTB	0.4	1.42116
P10074	Q9NRL2	ZBTB48	BAZ1A	BTB	0.46	1.38347
P10074	Q9NVP1	ZBTB48	DDX18	BTB	0	0.915639
P10074	Q9NY12	ZBTB48	GAR1	BTB	0.56	1.40972
P10074	Q9UL42	ZBTB48	PNMA2	BTB	1	4.17572
P10074	Q9ULW0	ZBTB48	TPX2	BTB	1	3.11337
P10074	Q9UN30	ZBTB48	SCML1	BTB	0.5	1.5514
P10074	Q9UNQ2	ZBTB48	DIMT1	BTB	0.95	1.93521
P10074	Q9Y2R4	ZBTB48	DDX52	BTB	0.5	2.20705
P10074	Q9Y4W2	ZBTB48	LAS1L	BTB	0	0.905488
P10075	O43663	GLI4	PRC1	NONE	0.96	3.05201
P10075	O75489	GLI4	NDUFS3	NONE	0.1	1.18143
P10075	O95218	GLI4	ZRANB2	NONE	0.91	1.83626
P10075	O95394	GLI4	PGM3	NONE	0	1.38401
P10075	P07858	GLI4	CTSB	NONE	0.98	2.20435
P10075	P14373	GLI4	TRIM27	NONE	1	13.3496
P10075	P17096	GLI4	HMGA1	NONE	0	0.559622
P10075	P17480	GLI4	UBTF	NONE	1	13.6638
P10075	P17980	GLI4	PSMC3	NONE	0	0.735395
P10075	P35251	GLI4	RFC1	NONE	0.48	1.53532
P10075	P38432	GLI4	COIL	NONE	0	1.16931
P10075	P49916	GLI4	LIG3	NONE	0.26	0.930776
P10075	P51398	GLI4	DAP3	NONE	0.98	2.56739
P10075	P51784	GLI4	USP11	NONE	0	0.896609
P10075	P57078	GLI4	RIPK4	NONE	0	1.05391
P10075	P61962	GLI4	DCAF7	NONE	1	7.16461
P10075	P63167	GLI4	DYNLL1	NONE	0.02	0.721201
P10075	P63244	GLI4	GNB2L1	NONE	0	0.67241
P10075	P67775	GLI4	PPP2CA	NONE	0.39	1.52658
P10075	Q02880	GLI4	TOP2B	NONE	0.03	1.60877
P10075	Q07021	GLI4	C1QBP	NONE	0	0.466583
P10075	Q12769	GLI4	NUP160	NONE	0.51	1.4137
P10075	Q13263	GLI4	TRIM28	NONE	0	0.433387
P10075	Q13428	GLI4	TCOF1	NONE	0.57	1.54685
P10075	Q13616	GLI4	CUL1	NONE	0	1.14835
P10075	Q14160	GLI4	SCRIB	NONE	0.49	1.4818
P10075	Q14566	GLI4	MCM6	NONE	0	0.882301
P10075	Q14684	GLI4	RRP1B	NONE	0	0.366573
P10075	Q14839	GLI4	CHD4	NONE	0.15	1.20865
P10075	Q49A26	GLI4	GLYR1	NONE	0.69	1.58637
P10075	Q5H9R7	GLI4	PPP6R3	NONE	0	1.2051
P10075	Q5SY16	GLI4	NOL9	NONE	1	4.25814
P10075	Q6PD62	GLI4	CTR9	NONE	0	1.11504
P10075	Q8IZL8	GLI4	PELP1	NONE	0.5	2.13044
P10075	Q8N163	GLI4	CCAR2	NONE	1	3.47657
P10075	Q8N7H5	GLI4	PAF1	NONE	1	2.64208
P10075	Q8WVC0	GLI4	LEO1	NONE	0.46	1.3138
P10075	Q92522	GLI4	H1FX	NONE	0.12	0.73985
P10075	Q92769	GLI4	HDAC2	NONE	0.01	1.23713
P10075	Q96EY1	GLI4	DNAJA3	NONE	0.95	1.97002
P10075	Q96PV6	GLI4	LENG8	NONE	0.46	1.53532
P10075	Q9GZS3	GLI4	WDR61	NONE	0.07	0.990954
P10075	Q9H6S0	GLI4	YTHDC2	NONE	0	0.959247
P10075	Q9H7D7	GLI4	WDR26	NONE	0.58	1.54999
P10075	Q9NQG5	GLI4	RPRD1B	NONE	1	4.94762
P10075	Q9NVP1	GLI4	DDX18	NONE	0	0.41287
P10075	Q9NY12	GLI4	GAR1	NONE	0	0.830737
P10075	Q9UBW7	GLI4	ZMYM2	NONE	0.5	2.19736
P10075	Q9UL42	GLI4	PNMA2	NONE	1	5.93844
P10075	Q9ULX6	GLI4	AKAP8L	NONE	0.5	1.51693
P10075	Q9UN30	GLI4	SCML1	NONE	1	2.43722
P10075	Q9UNQ2	GLI4	DIMT1	NONE	0.49	1.46159
P10075	Q9Y2R4	GLI4	DDX52	NONE	0.99	2.14964
P10075	Q9Y2S7	GLI4	Q9Y2S7	NONE	1	4.88814
P10075	Q9Y3D9	GLI4	MRPS23	NONE	1	3.57891
P10075	Q9Y4W2	GLI4	LAS1L	NONE	0.98	2.53243
P10075	Q9Y5Q9	GLI4	GTF3C3	NONE	0	1.2136
P11161	O00629	EGR2	KPNA4	NONE	0	0.988646
P11161	O43663	EGR2	PRC1	NONE	0.46	1.30244
P11161	O75489	EGR2	NDUFS3	NONE	0.24	1.25695
P11161	O75694	EGR2	NUP155	NONE	0.08	0.876834
P11161	P07858	EGR2	CTSB	NONE	0.28	1.22436
P11161	P13807	EGR2	GYS1	NONE	1	8.07054
P11161	P17096	EGR2	HMGA1	NONE	0	0.622989
P11161	P18887	EGR2	XRCC1	NONE	0	1.16383
P11161	P28482	EGR2	MAPK1	NONE	0.94	2.2051
P11161	P35222	EGR2	CTNNB1	NONE	1	10.9172
P11161	P49916	EGR2	LIG3	NONE	0	0.812407
P11161	P57078	EGR2	RIPK4	NONE	0	1.07945
P11161	P60510	EGR2	PPP4C	NONE	0.5	2.15271
P11161	P61962	EGR2	DCAF7	NONE	1	3.46158
P11161	P62993	EGR2	GRB2	NONE	0.5	2.07694
P11161	P63244	EGR2	GNB2L1	NONE	1	3.34314
P11161	Q07021	EGR2	C1QBP	NONE	0	0.397196
P11161	Q08209	EGR2	PPP3CA	NONE	1	4.18889
P11161	Q12769	EGR2	NUP160	NONE	0.17	0.888055
P11161	Q13263	EGR2	TRIM28	NONE	0	0.131912
P11161	Q13428	EGR2	TCOF1	NONE	0	0.31198
P11161	Q14566	EGR2	MCM6	NONE	0.01	0.914882
P11161	Q504T8	EGR2	MIDN	NONE	1	6.66392
P11161	Q86X55	EGR2	CARM1	NONE	0.95	2.49217
P11161	Q8TEM1	EGR2	NUP210	NONE	0.23	1.50886
P11161	Q92522	EGR2	H1FX	NONE	0.06	0.601824
P11161	Q93009	EGR2	USP7	NONE	1	9.1564
P11161	Q96EE3	EGR2	SEH1L	NONE	1	9.52148
P11161	Q96EY1	EGR2	DNAJA3	NONE	0.41	1.10527
P11161	Q96PV6	EGR2	LENG8	NONE	0.46	1.33454
P11161	Q9GZS3	EGR2	WDR61	NONE	0.07	0.899861
P11161	Q9H2D6	EGR2	TRIOBP	NONE	1	5.00249
P11161	Q9H7D7	EGR2	WDR26	NONE	0.46	1.44014
P11161	Q9NVP1	EGR2	DDX18	NONE	0	0.393597
P11161	Q9UKN8	EGR2	GTF3C4	NONE	0	1.21447
P11161	Q9ULX6	EGR2	AKAP8L	NONE	0	0.862618
P11161	Q9Y2S7	EGR2	Q9Y2S7	NONE	1	6.10371
P11161	Q9Y4W2	EGR2	LAS1L	NONE	0	0.759882
P13682	P02545	ZNF35	LMNA	NONE	0	0.700014
P13682	P17096	ZNF35	HMGA1	NONE	0	0.665804
P13682	P49916	ZNF35	LIG3	NONE	0	0.956882
P13682	P57078	ZNF35	RIPK4	NONE	0	1.06642
P13682	P61962	ZNF35	DCAF7	NONE	0.88	2.21083
P13682	P63167	ZNF35	DYNLL1	NONE	0.04	0.853221
P13682	P63244	ZNF35	GNB2L1	NONE	0	0.345673
P13682	Q02241	ZNF35	KIF23	NONE	0	0.962071
P13682	Q02880	ZNF35	TOP2B	NONE	0.04	1.31224
P13682	Q07021	ZNF35	C1QBP	NONE	0	0.385314
P13682	Q13263	ZNF35	TRIM28	NONE	0	1.32413
P13682	Q13428	ZNF35	TCOF1	NONE	0	0.858692
P13682	Q14566	ZNF35	MCM6	NONE	0	0.319814
P13682	Q86X55	ZNF35	CARM1	NONE	0	0.903156
P13682	Q8N163	ZNF35	CCAR2	NONE	0	0.581345
P13682	Q92522	ZNF35	H1FX	NONE	0.06	0.573356
P13682	Q92598	ZNF35	HSPH1	NONE	0	0.728901
P13682	Q96T88	ZNF35	Q96T88	NONE	0	0.985019
P13682	Q9BQ39	ZNF35	DDX50	NONE	0	0.925059
P13682	Q9NY12	ZNF35	GAR1	NONE	0.56	1.39337
P13682	Q9NYL2	ZNF35	Q9NYL2	NONE	0	1.4935
P13682	Q9Y2R4	ZNF35	DDX52	NONE	0	0.962071
P15622	O00505	ZNF250	KPNA3	KRAB	0	1.08024
P15622	O14936	ZNF250	CASK	KRAB	1	19.5312
P15622	O43663	ZNF250	PRC1	KRAB	0.9	1.90342
P15622	O60341	ZNF250	KDM1A	KRAB	0	1.10779
P15622	O75694	ZNF250	NUP155	KRAB	0.99	3.49957
P15622	P07858	ZNF250	CTSB	KRAB	0.36	1.2881
P15622	P12270	ZNF250	TPR	KRAB	0	1.2265
P15622	P14373	ZNF250	TRIM27	KRAB	0	1.1149
P15622	P17028	ZNF250	ZNF24	KRAB	0	1.1221
P15622	P17096	ZNF250	HMGA1	KRAB	0	0.721333
P15622	P17480	ZNF250	UBTF	KRAB	0	1.00524
P15622	P28482	ZNF250	MAPK1	KRAB	0.86	1.83315
P15622	P51784	ZNF250	USP11	KRAB	0.41	1.0541
P15622	P52294	ZNF250	KPNA1	KRAB	0	1.21637
P15622	P56545	ZNF250	CTBP2	KRAB	0	0.905675
P15622	P60510	ZNF250	PPP4C	KRAB	0.5	1.61973
P15622	P61962	ZNF250	DCAF7	KRAB	0.05	0.736946
P15622	P63167	ZNF250	DYNLL1	KRAB	0	0.586841
P15622	P63244	ZNF250	GNB2L1	KRAB	0	0.652564
P15622	Q02241	ZNF250	KIF23	KRAB	0	0.920063
P15622	Q07021	ZNF250	C1QBP	KRAB	0	0.562074
P15622	Q12769	ZNF250	NUP160	KRAB	0.09	0.93122
P15622	Q13263	ZNF250	TRIM28	KRAB	1	3.40767
P15622	Q13428	ZNF250	TCOF1	KRAB	0	0.252386
P15622	Q14160	ZNF250	SCRIB	KRAB	0	0.878207
P15622	Q14566	ZNF250	MCM6	KRAB	0.12	1.53065
P15622	Q14684	ZNF250	RRP1B	KRAB	0	0.413162
P15622	Q14839	ZNF250	CHD4	KRAB	0.04	0.856856
P15622	Q5H9R7	ZNF250	PPP6R3	KRAB	0	0.971511
P15622	Q86X55	ZNF250	CARM1	KRAB	0.73	1.7663
P15622	Q8IYB9	ZNF250	Q8IYB9	KRAB	0.48	1.75775
P15622	Q8N163	ZNF250	CCAR2	KRAB	0.08	0.884969
P15622	Q92522	ZNF250	H1FX	KRAB	0.06	0.692384
P15622	Q92598	ZNF250	HSPH1	KRAB	0.19	1.53427
P15622	Q93009	ZNF250	USP7	KRAB	0	0.759236
P15622	Q9H7D7	ZNF250	WDR26	KRAB	0.12	0.980499
P15622	Q9NVP1	ZNF250	DDX18	KRAB	0	0.893445
P15622	Q9UL42	ZNF250	PNMA2	KRAB	0.95	2.16137
P15622	Q9Y2G7	ZNF250	ZFP30	KRAB	1	5.64839
P15622	Q9Y2R4	ZNF250	DDX52	KRAB	0.41	1.1155
P15622	Q9Y2S7	ZNF250	Q9Y2S7	KRAB	0.41	1.09806
P15622	Q9Y4W2	ZNF250	LAS1L	KRAB	0	0.681773
P17019	A6NFI3	ZNF708	A6NFI3	KRAB	0.41	1.53844
P17019	A8MTY0	ZNF708	ZNF724P	KRAB	0	1.10031
P17019	O00505	ZNF708	KPNA3	KRAB	1	4.52005
P17019	O00629	ZNF708	KPNA4	KRAB	0.98	2.1133
P17019	O14641	ZNF708	DVL2	KRAB	0.41	1.27723
P17019	O43663	ZNF708	PRC1	KRAB	0.98	2.33919
P17019	O60341	ZNF708	KDM1A	KRAB	0.07	1.57779
P17019	O75190	ZNF708	DNAJB6	KRAB	0.39	1.36085
P17019	O75489	ZNF708	NDUFS3	KRAB	0.84	2.73758
P17019	O75694	ZNF708	NUP155	KRAB	1	4.06195
P17019	O95394	ZNF708	PGM3	KRAB	0.45	1.60864
P17019	P02545	ZNF708	LMNA	KRAB	0	0.522598
P17019	P07199	ZNF708	CENPB	KRAB	1	4.33077
P17019	P07858	ZNF708	CTSB	KRAB	0.65	1.62038
P17019	P17029	ZNF708	ZKSCAN1	KRAB	0.82	1.82467
P17019	P17096	ZNF708	HMGA1	KRAB	0	0.585209
P17019	P17480	ZNF708	UBTF	KRAB	1	4.20543
P17019	P17980	ZNF708	PSMC3	KRAB	0.35	1.74801
P17019	P28482	ZNF708	MAPK1	KRAB	0.46	1.39832
P17019	P35251	ZNF708	RFC1	KRAB	1	2.41077
P17019	P38432	ZNF708	COIL	KRAB	0	1.15923
P17019	P49916	ZNF708	LIG3	KRAB	0.62	1.82969
P17019	P51784	ZNF708	USP11	KRAB	0.41	1.23754
P17019	P52294	ZNF708	KPNA1	KRAB	0	1.47456
P17019	P60510	ZNF708	PPP4C	KRAB	0.45	1.3778
P17019	P61962	ZNF708	DCAF7	KRAB	0.97	2.15365
P17019	P62195	ZNF708	PSMC5	KRAB	0.75	3.12038
P17019	P62993	ZNF708	GRB2	KRAB	0	1.0865
P17019	P63167	ZNF708	DYNLL1	KRAB	0.02	0.760188
P17019	P63244	ZNF708	GNB2L1	KRAB	0	0.682211
P17019	P67775	ZNF708	PPP2CA	KRAB	0.48	1.64523
P17019	Q02241	ZNF708	KIF23	KRAB	0.45	1.11453
P17019	Q07021	ZNF708	C1QBP	KRAB	0	0.436492
P17019	Q12769	ZNF708	NUP160	KRAB	0.63	1.9001
P17019	Q13263	ZNF708	TRIM28	KRAB	1	11.4969
P17019	Q13363	ZNF708	CTBP1	KRAB	0	1.01044
P17019	Q13428	ZNF708	TCOF1	KRAB	0	0.326748
P17019	Q13547	ZNF708	HDAC1	KRAB	0	1.33059
P17019	Q13557	ZNF708	CAMK2D	KRAB	0	1.17496
P17019	Q13616	ZNF708	CUL1	KRAB	0.82	1.86059
P17019	Q13643	ZNF708	FHL3	KRAB	0	1.20773
P17019	Q14160	ZNF708	SCRIB	KRAB	1	2.55464
P17019	Q14566	ZNF708	MCM6	KRAB	0	0.457789
P17019	Q14592	ZNF708	ZNF460	KRAB	1	2.87194
P17019	Q14684	ZNF708	RRP1B	KRAB	0	0.989961
P17019	Q14839	ZNF708	CHD4	KRAB	0.18	1.4553
P17019	Q15654	ZNF708	TRIP6	KRAB	0.41	1.66284
P17019	Q49A26	ZNF708	GLYR1	KRAB	0.5	1.5461
P17019	Q5CZA5	ZNF708	ZNF805	KRAB	0	1.25136
P17019	Q5H9R7	ZNF708	PPP6R3	KRAB	1	3.03293
P17019	Q5SY16	ZNF708	NOL9	KRAB	0.5	1.72478
P17019	Q6P1J9	ZNF708	CDC73	KRAB	0.49	1.81301
P17019	Q6PD62	ZNF708	CTR9	KRAB	1	7.87837
P17019	Q7Z5L9	ZNF708	IRF2BP2	KRAB	0	1.15152
P17019	Q7Z6Z7	ZNF708	HUWE1	KRAB	0.47	1.92279
P17019	Q86WZ6	ZNF708	ZNF227	KRAB	0	1.16704
P17019	Q86X55	ZNF708	CARM1	KRAB	0	0.855675
P17019	Q8IZL8	ZNF708	PELP1	KRAB	0.16	1.52981
P17019	Q8N163	ZNF708	CCAR2	KRAB	0.01	0.974086
P17019	Q8N7H5	ZNF708	PAF1	KRAB	1	3.79398
P17019	Q8N9T8	ZNF708	KRI1	KRAB	0	1.19112
P17019	Q8WVC0	ZNF708	LEO1	KRAB	0.82	1.74602
P17019	Q92522	ZNF708	H1FX	KRAB	0	0.422
P17019	Q92598	ZNF708	HSPH1	KRAB	0.02	1.23873
P17019	Q92621	ZNF708	NUP205	KRAB	0	1.12169
P17019	Q93009	ZNF708	USP7	KRAB	0.78	2.20791
P17019	Q96EY1	ZNF708	DNAJA3	KRAB	0.97	2.32634
P17019	Q96PV6	ZNF708	LENG8	KRAB	0.41	1.51019
P17019	Q96T88	ZNF708	Q96T88	KRAB	0.5	2.54906
P17019	Q9BQ39	ZNF708	DDX50	KRAB	0	1.00968
P17019	Q9BQ67	ZNF708	GRWD1	KRAB	0.99	2.24818
P17019	Q9GZS3	ZNF708	WDR61	KRAB	0.94	2.77359
P17019	Q9H2P0	ZNF708	ADNP	KRAB	0	1.05991
P17019	Q9H4B6	ZNF708	SAV1	KRAB	0.82	1.96367
P17019	Q9H7D7	ZNF708	WDR26	KRAB	0.23	1.32255
P17019	Q9NRL2	ZNF708	BAZ1A	KRAB	0	1.11447
P17019	Q9NVP1	ZNF708	DDX18	KRAB	0	0.947952
P17019	Q9NY12	ZNF708	GAR1	KRAB	0	0.800318
P17019	Q9P2K3	ZNF708	RCOR3	KRAB	0	1.21621
P17019	Q9UL42	ZNF708	PNMA2	KRAB	0.95	1.75627
P17019	Q9ULT8	ZNF708	HECTD1	KRAB	1	2.78585
P17019	Q9ULW0	ZNF708	TPX2	KRAB	0	1.129
P17019	Q9ULX6	ZNF708	AKAP8L	KRAB	0.32	1.46009
P17019	Q9UNQ2	ZNF708	DIMT1	KRAB	0.9	1.85814
P17019	Q9Y2R4	ZNF708	DDX52	KRAB	1	2.48141
P17019	Q9Y2S7	ZNF708	Q9Y2S7	KRAB	0.9	1.67368
P17019	Q9Y4W2	ZNF708	LAS1L	KRAB	0.46	1.40382
P17020	O14641	ZNF16	DVL2	NONE	0.82	1.81741
P17020	O75190	ZNF16	DNAJB6	NONE	0	0.841649
P17020	O75694	ZNF16	NUP155	NONE	0	0.785144
P17020	P07199	ZNF16	CENPB	NONE	1	4.04756
P17020	P07305	ZNF16	H1F0	NONE	0	1.03129
P17020	P13807	ZNF16	GYS1	NONE	0	1.31051
P17020	P14373	ZNF16	TRIM27	NONE	0.45	1.40252
P17020	P17096	ZNF16	HMGA1	NONE	0	0.49476
P17020	P17480	ZNF16	UBTF	NONE	1	4.03052
P17020	P17980	ZNF16	PSMC3	NONE	0.02	0.983587
P17020	P28482	ZNF16	MAPK1	NONE	0	0.787982
P17020	P29590	ZNF16	PML	NONE	0	1.29354
P17020	P38432	ZNF16	COIL	NONE	0.45	1.69587
P17020	P49916	ZNF16	LIG3	NONE	0	1.02043
P17020	P51398	ZNF16	DAP3	NONE	1	5.76592
P17020	P51784	ZNF16	USP11	NONE	0	1.16301
P17020	P61962	ZNF16	DCAF7	NONE	0.05	0.871963
P17020	P62993	ZNF16	GRB2	NONE	0	1.13554
P17020	P63244	ZNF16	GNB2L1	NONE	0	0.188054
P17020	P67775	ZNF16	PPP2CA	NONE	0	0.551184
P17020	P82933	ZNF16	MRPS9	NONE	1	5.23543
P17020	Q02241	ZNF16	KIF23	NONE	0	1.00203
P17020	Q07021	ZNF16	C1QBP	NONE	0	0.205867
P17020	Q12769	ZNF16	NUP160	NONE	0	0.763635
P17020	Q13263	ZNF16	TRIM28	NONE	0	0.911195
P17020	Q13428	ZNF16	TCOF1	NONE	0.46	1.65325
P17020	Q13547	ZNF16	HDAC1	NONE	0	0.917343
P17020	Q14160	ZNF16	SCRIB	NONE	0.9	1.78818
P17020	Q14566	ZNF16	MCM6	NONE	0	0.519665
P17020	Q14592	ZNF16	ZNF460	NONE	0	1.00203
P17020	Q14684	ZNF16	RRP1B	NONE	0	0.990309
P17020	Q14839	ZNF16	CHD4	NONE	0	0.813932
P17020	Q15154	ZNF16	PCM1	NONE	0.9	2.22293
P17020	Q1ED39	ZNF16	KNOP1	NONE	0	1.09528
P17020	Q5SY16	ZNF16	NOL9	NONE	0	1.34583
P17020	Q7Z6Z7	ZNF16	HUWE1	NONE	0.53	2.27336
P17020	Q86X55	ZNF16	CARM1	NONE	0.36	1.55246
P17020	Q8IZL8	ZNF16	PELP1	NONE	0	0.923408
P17020	Q8N9M1	ZNF16	C19orf47	NONE	0.41	1.70408
P17020	Q8N9T8	ZNF16	KRI1	NONE	0	1.47139
P17020	Q92522	ZNF16	H1FX	NONE	0.15	1.08748
P17020	Q92598	ZNF16	HSPH1	NONE	0	0.567316
P17020	Q92665	ZNF16	MRPS31	NONE	1	5.10554
P17020	Q93009	ZNF16	USP7	NONE	0.1	1.04535
P17020	Q96JM3	ZNF16	CHAMP1	NONE	0	1.19022
P17020	Q96PV6	ZNF16	LENG8	NONE	0	1.3519
P17020	Q96T88	ZNF16	Q96T88	NONE	0.98	2.32628
P17020	Q9BQ39	ZNF16	DDX50	NONE	0	0.816621
P17020	Q9BQ67	ZNF16	GRWD1	NONE	0.25	1.37841
P17020	Q9H2D6	ZNF16	TRIOBP	NONE	0	1.2018
P17020	Q9H2P0	ZNF16	ADNP	NONE	0.41	2.06247
P17020	Q9H5H4	ZNF16	ZNF768	NONE	0.9	2.15992
P17020	Q9H6S0	ZNF16	YTHDC2	NONE	0	1.22983
P17020	Q9H7D7	ZNF16	WDR26	NONE	0	0.906474
P17020	Q9NVP1	ZNF16	DDX18	NONE	0	1.24128
P17020	Q9UBW7	ZNF16	ZMYM2	NONE	0	1.10507
P17020	Q9UL42	ZNF16	PNMA2	NONE	0	1.02701
P17020	Q9ULX6	ZNF16	AKAP8L	NONE	0.09	1.26832
P17020	Q9UN30	ZNF16	SCML1	NONE	0.5	1.58162
P17020	Q9Y291	ZNF16	MRPS33	NONE	0	1.26322
P17020	Q9Y2S7	ZNF16	Q9Y2S7	NONE	0.9	1.83115
P17020	Q9Y3D9	ZNF16	MRPS23	NONE	1	3.86747
P17020	Q9Y4W2	ZNF16	LAS1L	NONE	0.49	1.79801
P17022	O43242	ZNF18	PSMD3	KRAB;SCAN	0	1.02679
P17022	P17028	ZNF18	ZNF24	KRAB;SCAN	1	6.76674
P17022	P17096	ZNF18	HMGA1	KRAB;SCAN	0	0.622427
P17022	P51784	ZNF18	USP11	KRAB;SCAN	0	1.0358
P17022	P57086	ZNF18	SCAND1	KRAB;SCAN	1	5.29638
P17022	P62195	ZNF18	PSMC5	KRAB;SCAN	0.01	1.35916
P17022	P63244	ZNF18	GNB2L1	KRAB;SCAN	0	0.532576
P17022	Q07021	ZNF18	C1QBP	KRAB;SCAN	0	0.366397
P17022	Q12769	ZNF18	NUP160	KRAB;SCAN	0	0.868233
P17022	Q13263	ZNF18	TRIM28	KRAB;SCAN	0	1.20271
P17022	Q13428	ZNF18	TCOF1	KRAB;SCAN	0	0.315427
P17022	Q14684	ZNF18	RRP1B	KRAB;SCAN	0	0.543298
P17022	Q8TBC5	ZNF18	ZSCAN18	KRAB;SCAN	1	2.85725
P17022	Q92522	ZNF18	H1FX	KRAB;SCAN	0	0.640566
P17022	Q96T88	ZNF18	Q96T88	KRAB;SCAN	1	9.16544
P17022	Q9NWS9	ZNF18	ZNF446	KRAB;SCAN	1	3.95265
P17022	Q9UN30	ZNF18	SCML1	KRAB;SCAN	0.91	1.88922
P17022	Q9Y4W2	ZNF18	LAS1L	KRAB;SCAN	0.78	2.21907
P17026	O00629	ZNF22	KPNA4	NONE	0	1.21214
P17026	O14641	ZNF22	DVL2	NONE	0.96	2.50866
P17026	O43663	ZNF22	PRC1	NONE	0.96	2.9224
P17026	O75190	ZNF22	DNAJB6	NONE	0.33	1.35465
P17026	O75489	ZNF22	NDUFS3	NONE	1	5.1093
P17026	O95218	ZNF22	ZRANB2	NONE	0	1.14595
P17026	O95394	ZNF22	PGM3	NONE	1	2.89218
P17026	P02545	ZNF22	LMNA	NONE	0	1.27533
P17026	P07199	ZNF22	CENPB	NONE	0.49	1.43673
P17026	P07305	ZNF22	H1F0	NONE	0.91	1.67244
P17026	P07858	ZNF22	CTSB	NONE	1	4.21333
P17026	P09132	ZNF22	SRP19	NONE	0.49	1.90405
P17026	P14373	ZNF22	TRIM27	NONE	0	1.15156
P17026	P17480	ZNF22	UBTF	NONE	1	5.35349
P17026	P17980	ZNF22	PSMC3	NONE	0.5	1.98098
P17026	P38432	ZNF22	COIL	NONE	0	1.18642
P17026	P51398	ZNF22	DAP3	NONE	1	8.15015
P17026	P61962	ZNF22	DCAF7	NONE	0.95	2.19817
P17026	P63167	ZNF22	DYNLL1	NONE	0.02	0.818762
P17026	P63244	ZNF22	GNB2L1	NONE	0	0.518178
P17026	P67775	ZNF22	PPP2CA	NONE	1	7.73316
P17026	P82933	ZNF22	MRPS9	NONE	0.5	3.70661
P17026	Q02241	ZNF22	KIF23	NONE	1	3.09714
P17026	Q07021	ZNF22	C1QBP	NONE	0	0.600336
P17026	Q12769	ZNF22	NUP160	NONE	1	5.99443
P17026	Q13263	ZNF22	TRIM28	NONE	0	0.314189
P17026	Q13363	ZNF22	CTBP1	NONE	0.99	2.42891
P17026	Q13428	ZNF22	TCOF1	NONE	1	3.0432
P17026	Q13547	ZNF22	HDAC1	NONE	0	0.898773
P17026	Q13576	ZNF22	IQGAP2	NONE	1	7.43291
P17026	Q13601	ZNF22	KRR1	NONE	0.56	1.8058
P17026	Q14160	ZNF22	SCRIB	NONE	0.96	1.96951
P17026	Q14566	ZNF22	MCM6	NONE	0	0.351895
P17026	Q14684	ZNF22	RRP1B	NONE	0.71	2.56876
P17026	Q14839	ZNF22	CHD4	NONE	0.63	2.49705
P17026	Q1ED39	ZNF22	KNOP1	NONE	0.98	2.24281
P17026	Q5H9R7	ZNF22	PPP6R3	NONE	0.48	1.25483
P17026	Q5SY16	ZNF22	NOL9	NONE	0.96	1.8058
P17026	Q6P1J9	ZNF22	CDC73	NONE	0	1.14595
P17026	Q6PD62	ZNF22	CTR9	NONE	0.98	2.35159
P17026	Q8IZL8	ZNF22	PELP1	NONE	0	0.910708
P17026	Q8N163	ZNF22	CCAR2	NONE	0	0.629053
P17026	Q8N7H5	ZNF22	PAF1	NONE	1	4.92719
P17026	Q8N9T8	ZNF22	KRI1	NONE	0.5	1.72528
P17026	Q8WVC0	ZNF22	LEO1	NONE	0.46	1.5864
P17026	Q8WYP5	ZNF22	AHCTF1	NONE	1	2.82238
P17026	Q92522	ZNF22	H1FX	NONE	0.47	1.27346
P17026	Q92621	ZNF22	NUP205	NONE	1	7.54847
P17026	Q92665	ZNF22	MRPS31	NONE	0.99	3.80254
P17026	Q93009	ZNF22	USP7	NONE	0	0.848282
P17026	Q96EY1	ZNF22	DNAJA3	NONE	0.99	2.80797
P17026	Q96PV6	ZNF22	LENG8	NONE	0.96	2.28509
P17026	Q96ST2	ZNF22	IWS1	NONE	0.5	2.33594
P17026	Q9BQ39	ZNF22	DDX50	NONE	0.1	1.82413
P17026	Q9BQ67	ZNF22	GRWD1	NONE	0.75	1.81497
P17026	Q9GZS3	ZNF22	WDR61	NONE	0.96	2.36824
P17026	Q9H7D7	ZNF22	WDR26	NONE	0.2	1.08318
P17026	Q9NQ55	ZNF22	PPAN-P2RY11;PPAN	NONE	0.84	2.45117
P17026	Q9NVP1	ZNF22	DDX18	NONE	1	2.70137
P17026	Q9NY12	ZNF22	GAR1	NONE	1	2.95846
P17026	Q9UL42	ZNF22	PNMA2	NONE	0.48	1.44916
P17026	Q9ULX6	ZNF22	AKAP8L	NONE	0.17	1.24923
P17026	Q9UNQ2	ZNF22	DIMT1	NONE	0.99	2.64374
P17026	Q9Y2R4	ZNF22	DDX52	NONE	1	4.36061
P17026	Q9Y3D9	ZNF22	MRPS23	NONE	1	5.70086
P17026	Q9Y4W2	ZNF22	LAS1L	NONE	0.98	2.58766
P17032	A6NFI3	ZNF37A	A6NFI3	KRAB	0.48	1.95796
P17032	A8MTY0	ZNF37A	ZNF724P	KRAB	0	1.46052
P17032	O75190	ZNF37A	DNAJB6	KRAB	0.96	3.16161
P17032	P02545	ZNF37A	LMNA	KRAB	0	1.02516
P17032	P17096	ZNF37A	HMGA1	KRAB	0	1.27266
P17032	P51784	ZNF37A	USP11	KRAB	0	1.09263
P17032	P52737	ZNF37A	ZNF136	KRAB	0	1.22862
P17032	P63244	ZNF37A	GNB2L1	KRAB	0	0.272007
P17032	Q02386	ZNF37A	ZNF45	KRAB	0.45	1.76376
P17032	Q07021	ZNF37A	C1QBP	KRAB	0	0.455531
P17032	Q13263	ZNF37A	TRIM28	KRAB	1	24.9605
P17032	Q14588	ZNF37A	ZNF234	KRAB	0	1.20758
P17032	Q14592	ZNF37A	ZNF460	KRAB	1	3.49878
P17032	Q15072	ZNF37A	ZNF146	KRAB	0.41	1.4464
P17032	Q86WZ6	ZNF37A	ZNF227	KRAB	0.95	2.27822
P17032	Q8IZL8	ZNF37A	PELP1	KRAB	0	1.06896
P17032	Q96EY1	ZNF37A	DNAJA3	KRAB	0	0.985705
P17032	Q9ULX6	ZNF37A	AKAP8L	KRAB	1	4.15787
P17032	Q9Y4W2	ZNF37A	LAS1L	KRAB	0.72	2.62926
P17039	A6NFI3	ZNF30	A6NFI3	KRAB	1	3.44066
P17039	A8MTY0	ZNF30	ZNF724P	KRAB	0.5	1.95157
P17039	O43663	ZNF30	PRC1	KRAB	0	1.15493
P17039	O75190	ZNF30	DNAJB6	KRAB	0.61	2.00257
P17039	P02545	ZNF30	LMNA	KRAB	0	0.790806
P17039	P07199	ZNF30	CENPB	KRAB	0.95	2.04388
P17039	P07858	ZNF30	CTSB	KRAB	0.71	1.86264
P17039	P14373	ZNF30	TRIM27	KRAB	0.48	1.45365
P17039	P17029	ZNF30	ZKSCAN1	KRAB	0.96	2.72706
P17039	P17480	ZNF30	UBTF	KRAB	1	2.59756
P17039	P17980	ZNF30	PSMC3	KRAB	0	0.946405
P17039	P51784	ZNF30	USP11	KRAB	0.46	1.28752
P17039	P60510	ZNF30	PPP4C	KRAB	0	1.20961
P17039	P61962	ZNF30	DCAF7	KRAB	0.21	1.4212
P17039	P63244	ZNF30	GNB2L1	KRAB	0	0.560255
P17039	Q07021	ZNF30	C1QBP	KRAB	0	0.234215
P17039	Q13263	ZNF30	TRIM28	KRAB	1	21.2374
P17039	Q13363	ZNF30	CTBP1	KRAB	0	1.14523
P17039	Q13428	ZNF30	TCOF1	KRAB	0	0.499606
P17039	Q13501	ZNF30	SQSTM1	KRAB	0	1.20961
P17039	Q13547	ZNF30	HDAC1	KRAB	0	0.900544
P17039	Q14566	ZNF30	MCM6	KRAB	0	0.615768
P17039	Q14588	ZNF30	ZNF234	KRAB	0.48	1.4494
P17039	Q14592	ZNF30	ZNF460	KRAB	1	4.34412
P17039	Q14839	ZNF30	CHD4	KRAB	0.16	1.3516
P17039	Q15072	ZNF30	ZNF146	KRAB	0.95	2.17935
P17039	Q5H9R7	ZNF30	PPP6R3	KRAB	0.48	1.60039
P17039	Q6ZN55	ZNF30	ZNF574	KRAB	0	1.20249
P17039	Q86WZ6	ZNF30	ZNF227	KRAB	1	2.78421
P17039	Q8N7H5	ZNF30	PAF1	KRAB	0.99	2.29722
P17039	Q96EY1	ZNF30	DNAJA3	KRAB	0.47	1.54237
P17039	Q96T88	ZNF30	Q96T88	KRAB	0.5	2.99084
P17039	Q9BQ67	ZNF30	GRWD1	KRAB	0	0.890734
P17039	Q9H5H4	ZNF30	ZNF768	KRAB	0.99	2.48696
P17039	Q9UL42	ZNF30	PNMA2	KRAB	1	2.76297
P17039	Q9ULX6	ZNF30	AKAP8L	KRAB	0.77	2.29612
P17039	Q9UN30	ZNF30	SCML1	KRAB	0.98	4.39387
P17039	Q9Y4W2	ZNF30	LAS1L	KRAB	0	0.929197
P17098	P07858	ZNF8	CTSB	KRAB	0.18	1.19569
P17098	P17096	ZNF8	HMGA1	KRAB	0	0.639672
P17098	P49916	ZNF8	LIG3	KRAB	0	0.948387
P17098	P63167	ZNF8	DYNLL1	KRAB	0	0.77931
P17098	P63244	ZNF8	GNB2L1	KRAB	0	0.663899
P17098	Q07021	ZNF8	C1QBP	KRAB	0	0.799953
P17098	Q12769	ZNF8	NUP160	KRAB	0	0.880838
P17098	Q13263	ZNF8	TRIM28	KRAB	1	62.8011
P17098	Q13428	ZNF8	TCOF1	KRAB	0	0.395896
P17098	Q14592	ZNF8	ZNF460	KRAB	0.41	1.30685
P17098	Q92522	ZNF8	H1FX	KRAB	0.03	0.79445
P17098	Q92598	ZNF8	HSPH1	KRAB	0	1.43484
P17098	Q96B97	ZNF8	SH3KBP1	KRAB	0	1.20379
P17098	Q96EY1	ZNF8	DNAJA3	KRAB	0	0.917885
P17098	Q96T88	ZNF8	Q96T88	KRAB	1	6.66991
P17098	Q9BQ67	ZNF8	GRWD1	KRAB	0	0.86442
P17098	Q9ULX6	ZNF8	AKAP8L	KRAB	0.09	1.19888
P17098	Q9Y4W2	ZNF8	LAS1L	KRAB	0.09	1.09658
P25490	P17096	YY1	HMGA1	NONE	0	0.540435
P25490	P18887	YY1	XRCC1	NONE	0	1.20634
P25490	P35251	YY1	RFC1	NONE	0.96	1.90956
P25490	P49916	YY1	LIG3	NONE	0.6	1.77243
P25490	P63244	YY1	GNB2L1	NONE	0	0.352785
P25490	Q07021	YY1	C1QBP	NONE	0	0.165061
P25490	Q15020	YY1	SART3	NONE	0	1.23721
P25490	Q6P4R8	YY1	NFRKB	NONE	1	3.96681
P25490	Q9H981	YY1	ACTR8	NONE	1	5.04566
P25490	Q9ULG1	YY1	INO80	NONE	1	8.8216
P25490	Q9Y5K5	YY1	UCHL5	NONE	1	3.6971
P28698	O14641	MZF1	DVL2	SCAN	0.91	2.32953
P28698	O43663	MZF1	PRC1	SCAN	0.48	1.82091
P28698	O60341	MZF1	KDM1A	SCAN	0.07	1.41422
P28698	O75190	MZF1	DNAJB6	SCAN	0	0.882825
P28698	P07858	MZF1	CTSB	SCAN	0.18	1.12216
P28698	P17028	MZF1	ZNF24	SCAN	1	4.42349
P28698	P17029	MZF1	ZKSCAN1	SCAN	1	5.15178
P28698	P29590	MZF1	PML	SCAN	0.18	1.55452
P28698	P57086	MZF1	SCAND1	SCAN	1	5.29194
P28698	P60510	MZF1	PPP4C	SCAN	0	1.18573
P28698	P61962	MZF1	DCAF7	SCAN	0.1	1.25264
P28698	P63167	MZF1	DYNLL1	SCAN	0.01	0.919196
P28698	P63244	MZF1	GNB2L1	SCAN	0	0.488735
P28698	Q02241	MZF1	KIF23	SCAN	0	1.03213
P28698	Q07021	MZF1	C1QBP	SCAN	0	0.434762
P28698	Q12888	MZF1	TP53BP1	SCAN	0	1.39717
P28698	Q13263	MZF1	TRIM28	SCAN	1	4.95387
P28698	Q13363	MZF1	CTBP1	SCAN	0	1.09938
P28698	Q13428	MZF1	TCOF1	SCAN	0	1.29316
P28698	Q13547	MZF1	HDAC1	SCAN	0	0.971664
P28698	Q14592	MZF1	ZNF460	SCAN	0.98	2.34759
P28698	Q14839	MZF1	CHD4	SCAN	0	0.856465
P28698	Q15776	MZF1	ZKSCAN8	SCAN	1	3.68081
P28698	Q7Z5L9	MZF1	IRF2BP2	SCAN	0	1.19561
P28698	Q8N163	MZF1	CCAR2	SCAN	0	1.0742
P28698	Q8TBC5	MZF1	ZSCAN18	SCAN	1	13.7633
P28698	Q93009	MZF1	USP7	SCAN	0.5	2.05221
P28698	Q96T88	MZF1	Q96T88	SCAN	0.9	1.94408
P28698	Q9BQ67	MZF1	GRWD1	SCAN	0.07	1.12617
P28698	Q9H2P0	MZF1	ADNP	SCAN	0.16	1.37507
P28698	Q9H5H4	MZF1	ZNF768	SCAN	0.97	2.43502
P28698	Q9NWS9	MZF1	ZNF446	SCAN	0.82	2.06968
P28698	Q9NY12	MZF1	GAR1	SCAN	0	0.937658
P28698	Q9UBW7	MZF1	ZMYM2	SCAN	1	13.7936
P28698	Q9UL42	MZF1	PNMA2	SCAN	0.91	1.72715
P28698	Q9ULX6	MZF1	AKAP8L	SCAN	0.48	1.91476
P28698	Q9UN30	MZF1	SCML1	SCAN	1	3.04943
P28698	Q9Y4W2	MZF1	LAS1L	SCAN	0.23	1.36556
P36508	O00505	ZNF76	KPNA3	NONE	1	6.92611
P36508	O00629	ZNF76	KPNA4	NONE	1	2.24284
P36508	O75694	ZNF76	NUP155	NONE	0.26	1.14351
P36508	P12270	ZNF76	TPR	NONE	0	0.829731
P36508	P17096	ZNF76	HMGA1	NONE	0	0.477574
P36508	P28482	ZNF76	MAPK1	NONE	0.66	1.32853
P36508	P49916	ZNF76	LIG3	NONE	0	0.702414
P36508	P51784	ZNF76	USP11	NONE	0.95	1.55127
P36508	P63167	ZNF76	DYNLL1	NONE	0.04	0.706327
P36508	P63244	ZNF76	GNB2L1	NONE	0	0.425276
P36508	P67775	ZNF76	PPP2CA	NONE	0.36	1.24143
P36508	Q02241	ZNF76	KIF23	NONE	0	0.891517
P36508	Q02880	ZNF76	TOP2B	NONE	0	0.715327
P36508	Q07021	ZNF76	C1QBP	NONE	0	0.406739
P36508	Q13263	ZNF76	TRIM28	NONE	0	0.699857
P36508	Q13428	ZNF76	TCOF1	NONE	0	0.503063
P36508	Q13547	ZNF76	HDAC1	NONE	0	0.611363
P36508	Q13643	ZNF76	FHL3	NONE	1	4.77309
P36508	Q14160	ZNF76	SCRIB	NONE	0.46	1.0279
P36508	Q14566	ZNF76	MCM6	NONE	0	0.857545
P36508	Q14684	ZNF76	RRP1B	NONE	0	0.380769
P36508	Q14839	ZNF76	CHD4	NONE	0.08	0.814845
P36508	Q49A26	ZNF76	GLYR1	NONE	0	0.917803
P36508	Q7Z7K2	ZNF76	ZNF467	NONE	0.49	1.75196
P36508	Q86U42	ZNF76	PABPN1	NONE	0	1.21995
P36508	Q86X55	ZNF76	CARM1	NONE	0.81	1.70191
P36508	Q8IUH3	ZNF76	RBM45	NONE	1	50.7336
P36508	Q8N163	ZNF76	CCAR2	NONE	0.01	0.73707
P36508	Q8NFW8	ZNF76	CMAS	NONE	0	1.04052
P36508	Q8TEM1	ZNF76	NUP210	NONE	0.48	2.45633
P36508	Q92522	ZNF76	H1FX	NONE	0	0.475823
P36508	Q92598	ZNF76	HSPH1	NONE	0.16	1.3374
P36508	Q92621	ZNF76	NUP205	NONE	0	1.34231
P36508	Q93009	ZNF76	USP7	NONE	0	0.879401
P36508	Q96EY1	ZNF76	DNAJA3	NONE	0.28	0.804425
P36508	Q9BQ39	ZNF76	DDX50	NONE	0.01	0.818379
P36508	Q9BQ67	ZNF76	GRWD1	NONE	0.13	0.854314
P36508	Q9NQ55	ZNF76	PPAN-P2RY11;PPAN	NONE	0.37	1.6379
P36508	Q9NVP1	ZNF76	DDX18	NONE	0	0.349464
P36508	Q9UNQ2	ZNF76	DIMT1	NONE	0.46	1.39843
P36508	Q9Y2R4	ZNF76	DDX52	NONE	0	0.891517
P52737	A6NFI3	ZNF136	A6NFI3	KRAB	0	1.15377
P52737	O43242	ZNF136	PSMD3	KRAB	0.19	2.05137
P52737	O60341	ZNF136	KDM1A	KRAB	0.13	1.42047
P52737	O75190	ZNF136	DNAJB6	KRAB	0.99	2.99501
P52737	O75489	ZNF136	NDUFS3	KRAB	0.51	2.31343
P52737	P07858	ZNF136	CTSB	KRAB	0.5	2.73511
P52737	P17480	ZNF136	UBTF	KRAB	0.48	1.33777
P52737	P17980	ZNF136	PSMC3	KRAB	0.13	1.23863
P52737	P51784	ZNF136	USP11	KRAB	0.99	2.28517
P52737	P52737	ZNF136	ZNF136	KRAB	0	0.948377
P52737	P57078	ZNF136	RIPK4	KRAB	0	1.12384
P52737	P61962	ZNF136	DCAF7	KRAB	0.96	2.60889
P52737	P63244	ZNF136	GNB2L1	KRAB	0	0.873499
P52737	P67775	ZNF136	PPP2CA	KRAB	0.12	1.17335
P52737	Q02386	ZNF136	ZNF45	KRAB	0.48	1.73642
P52737	Q07021	ZNF136	C1QBP	KRAB	0	0.782481
P52737	Q12769	ZNF136	NUP160	KRAB	0.17	0.999533
P52737	Q12888	ZNF136	TP53BP1	KRAB	0.49	1.65021
P52737	Q13263	ZNF136	TRIM28	KRAB	1	21.9274
P52737	Q13428	ZNF136	TCOF1	KRAB	0	0.339532
P52737	Q13501	ZNF136	SQSTM1	KRAB	0	1.18999
P52737	Q13547	ZNF136	HDAC1	KRAB	0	0.991446
P52737	Q13576	ZNF136	IQGAP2	KRAB	0.98	7.1733
P52737	Q14592	ZNF136	ZNF460	KRAB	0.5	1.70714
P52737	Q14684	ZNF136	RRP1B	KRAB	0	1.12732
P52737	Q5H9R7	ZNF136	PPP6R3	KRAB	0.48	1.53856
P52737	Q5SY16	ZNF136	NOL9	KRAB	0	1.13647
P52737	Q8N163	ZNF136	CCAR2	KRAB	0.5	3.14017
P52737	Q8N7H5	ZNF136	PAF1	KRAB	0.5	3.11094
P52737	Q96EY1	ZNF136	DNAJA3	KRAB	0.41	1.41518
P52737	Q96T88	ZNF136	Q96T88	KRAB	0	1.06093
P52737	Q9BQ67	ZNF136	GRWD1	KRAB	0	0.806863
P52737	Q9GZS3	ZNF136	WDR61	KRAB	0.21	1.18757
P52737	Q9H6S0	ZNF136	YTHDC2	KRAB	0	1.05355
P52737	Q9HCM9	ZNF136	TRIM39	KRAB	1	10.9335
P52737	Q9UL42	ZNF136	PNMA2	KRAB	1	8.52766
P52737	Q9UN30	ZNF136	SCML1	KRAB	1	4.51618
P52737	Q9Y2R4	ZNF136	DDX52	KRAB	0.49	1.48566
P52737	Q9Y4W2	ZNF136	LAS1L	KRAB	0.5	1.5719
P52738	A6NFI3	ZNF140	A6NFI3	KRAB	0	1.16298
P52738	A8MTY0	ZNF140	ZNF724P	KRAB	0	1.42499
P52738	O75190	ZNF140	DNAJB6	KRAB	0.09	1.31231
P52738	P07199	ZNF140	CENPB	KRAB	0.82	1.75644
P52738	P07305	ZNF140	H1F0	KRAB	0	1.08329
P52738	P07858	ZNF140	CTSB	KRAB	0	0.961014
P52738	P17029	ZNF140	ZKSCAN1	KRAB	0	1.18371
P52738	P17096	ZNF140	HMGA1	KRAB	0	0.493727
P52738	P17480	ZNF140	UBTF	KRAB	0	1.11607
P52738	P17980	ZNF140	PSMC3	KRAB	0	0.893756
P52738	P49916	ZNF140	LIG3	KRAB	0	0.921027
P52738	P51858	ZNF140	HDGF	KRAB	0	1.13128
P52738	P52737	ZNF140	ZNF136	KRAB	0	1.20958
P52738	P61962	ZNF140	DCAF7	KRAB	0.05	0.980658
P52738	P63244	ZNF140	GNB2L1	KRAB	0	0.189427
P52738	Q07021	ZNF140	C1QBP	KRAB	0	0.320384
P52738	Q12769	ZNF140	NUP160	KRAB	0.09	1.2115
P52738	Q12888	ZNF140	TP53BP1	KRAB	0	1.16706
P52738	Q13263	ZNF140	TRIM28	KRAB	1	4.74725
P52738	Q13428	ZNF140	TCOF1	KRAB	0	0.619341
P52738	Q14160	ZNF140	SCRIB	KRAB	0	1.24825
P52738	Q14566	ZNF140	MCM6	KRAB	0	0.540714
P52738	Q14588	ZNF140	ZNF234	KRAB	0	1.1795
P52738	Q14592	ZNF140	ZNF460	KRAB	0	1.28408
P52738	Q14684	ZNF140	RRP1B	KRAB	0	0.745613
P52738	Q5SY16	ZNF140	NOL9	KRAB	0	1.14691
P52738	Q7Z6Z7	ZNF140	HUWE1	KRAB	0.33	2.03134
P52738	Q86X55	ZNF140	CARM1	KRAB	0	1.01383
P52738	Q8IZL8	ZNF140	PELP1	KRAB	0	0.992616
P52738	Q8N163	ZNF140	CCAR2	KRAB	0	0.893467
P52738	Q8N7H5	ZNF140	PAF1	KRAB	0	1.08329
P52738	Q92522	ZNF140	H1FX	KRAB	0.03	0.883456
P52738	Q9BQ67	ZNF140	GRWD1	KRAB	0.07	1.18718
P52738	Q9NRL2	ZNF140	BAZ1A	KRAB	0	1.18371
P52738	Q9NVP1	ZNF140	DDX18	KRAB	0	0.885173
P52738	Q9UBW7	ZNF140	ZMYM2	KRAB	0	1.14296
P52738	Q9UL42	ZNF140	PNMA2	KRAB	0	1.07977
P52738	Q9ULX6	ZNF140	AKAP8L	KRAB	0.09	1.37326
P52738	Q9UMX1	ZNF140	SUFU	KRAB	0	1.51054
P52738	Q9Y330	ZNF140	ZBTB12	KRAB	0	1.26007
P52738	Q9Y4W2	ZNF140	LAS1L	KRAB	0.09	1.06076
P52741	O43242	ZNF134	PSMD3	NONE	0	0.943536
P52741	O75489	ZNF134	NDUFS3	NONE	0	0.792408
P52741	O75694	ZNF134	NUP155	NONE	0	0.641441
P52741	P17096	ZNF134	HMGA1	NONE	0	0.659378
P52741	P17480	ZNF134	UBTF	NONE	0.48	1.52212
P52741	P17980	ZNF134	PSMC3	NONE	0	0.805574
P52741	P49916	ZNF134	LIG3	NONE	0	1.01375
P52741	P57078	ZNF134	RIPK4	NONE	0.35	1.32438
P52741	P63167	ZNF134	DYNLL1	NONE	0.02	0.833949
P52741	P63244	ZNF134	GNB2L1	NONE	0	0.446183
P52741	Q02241	ZNF134	KIF23	NONE	0	0.997914
P52741	Q07021	ZNF134	C1QBP	NONE	0	0.523212
P52741	Q13263	ZNF134	TRIM28	NONE	0.01	1.52882
P52741	Q14566	ZNF134	MCM6	NONE	0	0.665341
P52741	Q49A26	ZNF134	GLYR1	NONE	0.81	1.88461
P52741	Q5H9R7	ZNF134	PPP6R3	NONE	0	1.04076
P52741	Q7Z6Z7	ZNF134	HUWE1	NONE	0	0.72164
P52741	Q8N163	ZNF134	CCAR2	NONE	0	0.528226
P52741	Q92522	ZNF134	H1FX	NONE	0.29	1.07519
P52741	Q93009	ZNF134	USP7	NONE	0	0.856826
P52741	Q96T88	ZNF134	Q96T88	NONE	0.5	1.66818
P52741	Q9GZS3	ZNF134	WDR61	NONE	0	0.930319
P52741	Q9H6F5	ZNF134	CCDC86	NONE	0	1.10228
P52741	Q9NRL2	ZNF134	BAZ1A	NONE	0	1.15479
P52741	Q9NVP1	ZNF134	DDX18	NONE	0	0.784403
P52741	Q9NYL2	ZNF134	Q9NYL2	NONE	0.5	2.28862
P52741	Q9UGI8	ZNF134	TES	NONE	0	1.36751
P52741	Q9Y2S7	ZNF134	Q9Y2S7	NONE	0	0.98574
P52741	Q9Y4W2	ZNF134	LAS1L	NONE	0	0.784712
P56270	O00629	MAZ	KPNA4	NONE	0	0.940825
P56270	O14641	MAZ	DVL2	NONE	0.41	1.2874
P56270	O14936	MAZ	CASK	NONE	0	1.18674
P56270	O43663	MAZ	PRC1	NONE	0	1.03758
P56270	O43813	MAZ	LANCL1	NONE	0.95	2.8946
P56270	O60341	MAZ	KDM1A	NONE	0.07	1.5872
P56270	O75489	MAZ	NDUFS3	NONE	0.07	1.00284
P56270	O75694	MAZ	NUP155	NONE	0.67	2.42051
P56270	P02545	MAZ	LMNA	NONE	0	2.02085
P56270	P05204	MAZ	HMGN2	NONE	0.5	4.05287
P56270	P07305	MAZ	H1F0	NONE	0.48	1.37617
P56270	P07858	MAZ	CTSB	NONE	0	0.799928
P56270	P09132	MAZ	SRP19	NONE	0.5	1.85801
P56270	P12270	MAZ	TPR	NONE	1	7.91967
P56270	P12755	MAZ	SKI	NONE	0	1.26089
P56270	P17096	MAZ	HMGA1	NONE	0.27	1.09373
P56270	P17480	MAZ	UBTF	NONE	0.5	1.66083
P56270	P28482	MAZ	MAPK1	NONE	0.23	0.987527
P56270	P49916	MAZ	LIG3	NONE	0.54	1.70669
P56270	P50995	MAZ	ANXA11	NONE	0.07	1.31038
P56270	P51610	MAZ	HCFC1	NONE	0.41	1.44829
P56270	P51858	MAZ	HDGF	NONE	0.45	2.35998
P56270	P56545	MAZ	CTBP2	NONE	0.3	1.89109
P56270	P60510	MAZ	PPP4C	NONE	0.45	1.38454
P56270	P61962	MAZ	DCAF7	NONE	0.48	1.28238
P56270	P63167	MAZ	DYNLL1	NONE	0	0.514416
P56270	P63244	MAZ	GNB2L1	NONE	0	0.548503
P56270	P67775	MAZ	PPP2CA	NONE	0.83	2.01558
P56270	Q07021	MAZ	C1QBP	NONE	0	0.773374
P56270	Q12769	MAZ	NUP160	NONE	0.58	2.36934
P56270	Q12888	MAZ	TP53BP1	NONE	0.5	1.79087
P56270	Q13263	MAZ	TRIM28	NONE	1	1.99175
P56270	Q13363	MAZ	CTBP1	NONE	0.5	2.32022
P56270	Q13428	MAZ	TCOF1	NONE	0.88	2.29454
P56270	Q13547	MAZ	HDAC1	NONE	0	1.08111
P56270	Q14160	MAZ	SCRIB	NONE	0.5	1.6464
P56270	Q14566	MAZ	MCM6	NONE	0.72	3.1247
P56270	Q14684	MAZ	RRP1B	NONE	0	0.875236
P56270	Q14839	MAZ	CHD4	NONE	0.09	1.02671
P56270	Q49A26	MAZ	GLYR1	NONE	0.25	1.15868
P56270	Q86U42	MAZ	PABPN1	NONE	0.45	1.48742
P56270	Q86X55	MAZ	CARM1	NONE	0.43	1.42247
P56270	Q8N163	MAZ	CCAR2	NONE	0.5	1.47424
P56270	Q8N7H5	MAZ	PAF1	NONE	0.5	1.58133
P56270	Q8NFW8	MAZ	CMAS	NONE	0.41	1.29497
P56270	Q8TBC5	MAZ	ZSCAN18	NONE	0	1.24363
P56270	Q8WVC0	MAZ	LEO1	NONE	0	1.07441
P56270	Q8WYP5	MAZ	AHCTF1	NONE	0.45	1.3342
P56270	Q92522	MAZ	H1FX	NONE	0.35	1.17551
P56270	Q92769	MAZ	HDAC2	NONE	0	0.852498
P56270	Q93009	MAZ	USP7	NONE	0.2	1.10097
P56270	Q96JM3	MAZ	CHAMP1	NONE	0.5	1.90564
P56270	Q96PV6	MAZ	LENG8	NONE	0	1.06809
P56270	Q96ST2	MAZ	IWS1	NONE	0	1.26089
P56270	Q9BQ39	MAZ	DDX50	NONE	0	0.723451
P56270	Q9BTD8	MAZ	RBM42	NONE	0.48	1.67993
P56270	Q9GZS3	MAZ	WDR61	NONE	0.25	1.3972
P56270	Q9H2D6	MAZ	TRIOBP	NONE	0	1.17904
P56270	Q9NVP1	MAZ	DDX18	NONE	0	0.453934
P56270	Q9NY12	MAZ	GAR1	NONE	0.37	1.16021
P56270	Q9UBW7	MAZ	ZMYM2	NONE	0.5	1.50416
P56270	Q9Y2R4	MAZ	DDX52	NONE	0.82	1.52458
P56270	Q9Y2S7	MAZ	Q9Y2S7	NONE	0.5	2.6703
P58317	A6NFI3	ZNF121	A6NFI3	NONE	0.91	1.88488
P58317	A8MTY0	ZNF121	ZNF724P	NONE	1	2.89685
P58317	O15350	ZNF121	TP73	NONE	0.48	1.45225
P58317	O43663	ZNF121	PRC1	NONE	0.95	2.0652
P58317	O75190	ZNF121	DNAJB6	NONE	0.82	2.40609
P58317	O75489	ZNF121	NDUFS3	NONE	0	0.850402
P58317	O75694	ZNF121	NUP155	NONE	0.03	1.00408
P58317	O95394	ZNF121	PGM3	NONE	0	1.18345
P58317	P02545	ZNF121	LMNA	NONE	0	2.60117
P58317	P07199	ZNF121	CENPB	NONE	0.99	2.39506
P58317	P07858	ZNF121	CTSB	NONE	0.28	1.33009
P58317	P17028	ZNF121	ZNF24	NONE	0	1.17874
P58317	P17029	ZNF121	ZKSCAN1	NONE	1	4.91497
P58317	P17480	ZNF121	UBTF	NONE	1	3.20275
P58317	P17980	ZNF121	PSMC3	NONE	0.04	1.22934
P58317	P29590	ZNF121	PML	NONE	0.81	2.25977
P58317	P51784	ZNF121	USP11	NONE	0	0.99968
P58317	P61962	ZNF121	DCAF7	NONE	0.21	1.26848
P58317	P63167	ZNF121	DYNLL1	NONE	0.02	0.935591
P58317	P63244	ZNF121	GNB2L1	NONE	0	0.749125
P58317	Q07021	ZNF121	C1QBP	NONE	0	0.447675
P58317	Q12769	ZNF121	NUP160	NONE	0	0.817535
P58317	Q13263	ZNF121	TRIM28	NONE	1	4.30242
P58317	Q13363	ZNF121	CTBP1	NONE	0.46	1.57307
P58317	Q13428	ZNF121	TCOF1	NONE	0	0.800463
P58317	Q13501	ZNF121	SQSTM1	NONE	0.48	1.69299
P58317	Q13547	ZNF121	HDAC1	NONE	0	1.15529
P58317	Q14160	ZNF121	SCRIB	NONE	0	1.00648
P58317	Q14566	ZNF121	MCM6	NONE	0	0.501294
P58317	Q14592	ZNF121	ZNF460	NONE	0.5	1.69985
P58317	Q14839	ZNF121	CHD4	NONE	0.24	1.60055
P58317	Q15072	ZNF121	ZNF146	NONE	0	1.14679
P58317	Q3KQU3	ZNF121	MAP7D1	NONE	0.96	1.95322
P58317	Q5H9R7	ZNF121	PPP6R3	NONE	0	1.30451
P58317	Q5SY16	ZNF121	NOL9	NONE	0.5	1.85602
P58317	Q6ZN55	ZNF121	ZNF574	NONE	0.48	1.67951
P58317	Q86X55	ZNF121	CARM1	NONE	0.43	1.4101
P58317	Q8N163	ZNF121	CCAR2	NONE	0.15	1.34383
P58317	Q8N7H5	ZNF121	PAF1	NONE	0.91	1.74262
P58317	Q93009	ZNF121	USP7	NONE	0.69	2.07104
P58317	Q96EY1	ZNF121	DNAJA3	NONE	0.98	2.49769
P58317	Q96JM3	ZNF121	CHAMP1	NONE	0.48	1.71362
P58317	Q96PV6	ZNF121	LENG8	NONE	1	4.0387
P58317	Q96T88	ZNF121	Q96T88	NONE	1	4.19941
P58317	Q9BQ67	ZNF121	GRWD1	NONE	0.75	1.98922
P58317	Q9H2D6	ZNF121	TRIOBP	NONE	0	1.21252
P58317	Q9H5H4	ZNF121	ZNF768	NONE	1	3.94871
P58317	Q9H6W3	ZNF121	Q9H6W3	NONE	0.49	1.77116
P58317	Q9H7D7	ZNF121	WDR26	NONE	0.98	2.77055
P58317	Q9NXF1	ZNF121	TEX10	NONE	0	1.21751
P58317	Q9UL42	ZNF121	PNMA2	NONE	0.98	2.18694
P58317	Q9ULX6	ZNF121	AKAP8L	NONE	1	5.31271
P58317	Q9UN30	ZNF121	SCML1	NONE	1	3.30083
P58317	Q9Y2R4	ZNF121	DDX52	NONE	0	1.03823
P58317	Q9Y4W2	ZNF121	LAS1L	NONE	0.98	2.81322
P59817	O00629	ZNF280A	KPNA4	NONE	0	1.23774
P59817	O43242	ZNF280A	PSMD3	NONE	0	1.1647
P59817	P17096	ZNF280A	HMGA1	NONE	0	0.602341
P59817	P28482	ZNF280A	MAPK1	NONE	0.48	1.65704
P59817	P52294	ZNF280A	KPNA1	NONE	0	1.23363
P59817	P56545	ZNF280A	CTBP2	NONE	0	1.00126
P59817	P61962	ZNF280A	DCAF7	NONE	0	0.735497
P59817	P63167	ZNF280A	DYNLL1	NONE	0.01	0.870068
P59817	P63244	ZNF280A	GNB2L1	NONE	0	0.772949
P59817	Q07021	ZNF280A	C1QBP	NONE	0	0.619821
P59817	Q12769	ZNF280A	NUP160	NONE	0	0.77952
P59817	Q13263	ZNF280A	TRIM28	NONE	0	0.472526
P59817	Q14160	ZNF280A	SCRIB	NONE	0	0.978691
P59817	Q14566	ZNF280A	MCM6	NONE	0.01	1.74537
P59817	Q15654	ZNF280A	TRIP6	NONE	1	23.3676
P59817	Q7Z7K2	ZNF280A	ZNF467	NONE	0	1.24543
P59817	Q86X55	ZNF280A	CARM1	NONE	0	0.960643
P59817	Q86YH2	ZNF280A	ZNF280B	NONE	1	70.0459
P59817	Q92598	ZNF280A	HSPH1	NONE	0.02	1.57596
P59817	Q96B97	ZNF280A	SH3KBP1	NONE	0	1.17784
P59817	Q96EY1	ZNF280A	DNAJA3	NONE	0.76	1.86807
P59817	Q9GZS3	ZNF280A	WDR61	NONE	0.04	0.956556
P59817	Q9HAU5	ZNF280A	UPF2	NONE	1	5.31537
P59817	Q9NVP1	ZNF280A	DDX18	NONE	0	0.594661
P59817	Q9Y2S7	ZNF280A	Q9Y2S7	NONE	0	1.00126
P98182	O75694	ZNF200	NUP155	NONE	0	0.575877
P98182	O95218	ZNF200	ZRANB2	NONE	0.91	1.84154
P98182	P07199	ZNF200	CENPB	NONE	0	0.969792
P98182	P07858	ZNF200	CTSB	NONE	0.28	1.17384
P98182	P09132	ZNF200	SRP19	NONE	0	1.38745
P98182	P17096	ZNF200	HMGA1	NONE	0	0.643783
P98182	P17480	ZNF200	UBTF	NONE	0	1.24958
P98182	P28482	ZNF200	MAPK1	NONE	0	0.718687
P98182	P51610	ZNF200	HCFC1	NONE	1	5.5339
P98182	P60510	ZNF200	PPP4C	NONE	0.96	1.88457
P98182	P61962	ZNF200	DCAF7	NONE	0.24	1.06063
P98182	P63167	ZNF200	DYNLL1	NONE	0.02	0.732958
P98182	P63244	ZNF200	GNB2L1	NONE	0	0.509606
P98182	Q07021	ZNF200	C1QBP	NONE	0	0.539873
P98182	Q13263	ZNF200	TRIM28	NONE	0	0.74369
P98182	Q13428	ZNF200	TCOF1	NONE	0	0.78375
P98182	Q13547	ZNF200	HDAC1	NONE	0	0.977662
P98182	Q14160	ZNF200	SCRIB	NONE	0	1.1051
P98182	Q14566	ZNF200	MCM6	NONE	0	0.767931
P98182	Q6PD62	ZNF200	CTR9	NONE	0	1.11839
P98182	Q8N163	ZNF200	CCAR2	NONE	0.01	0.861314
P98182	Q8N7H5	ZNF200	PAF1	NONE	1	2.65703
P98182	Q92598	ZNF200	HSPH1	NONE	0	0.49739
P98182	Q96EY1	ZNF200	DNAJA3	NONE	0.81	1.52082
P98182	Q96T88	ZNF200	Q96T88	NONE	0	1.18161
P98182	Q9BQ67	ZNF200	GRWD1	NONE	0	0.674416
P98182	Q9GZS3	ZNF200	WDR61	NONE	0	0.852691
P98182	Q9NVP1	ZNF200	DDX18	NONE	0	0.295365
P98182	Q9NY12	ZNF200	GAR1	NONE	0.28	1.01583
P98182	Q9UGI8	ZNF200	TES	NONE	0	1.09967
Q02086	O75694	SP2	NUP155	NONE	0	0.640973
Q02086	P17096	SP2	HMGA1	NONE	0	0.658715
Q02086	P28482	SP2	MAPK1	NONE	0.33	1.27991
Q02086	P49916	SP2	LIG3	NONE	0	1.01324
Q02086	P57078	SP2	RIPK4	NONE	0	1.09212
Q02086	P63167	SP2	DYNLL1	NONE	0.02	0.833213
Q02086	P63244	SP2	GNB2L1	NONE	0	0.53262
Q02086	Q07021	SP2	C1QBP	NONE	0	0.465923
Q02086	Q12769	SP2	NUP160	NONE	0.17	1.079
Q02086	Q13263	SP2	TRIM28	NONE	0	0.20197
Q02086	Q13428	SP2	TCOF1	NONE	0	0.929696
Q02086	Q13643	SP2	FHL3	NONE	0	1.22474
Q02086	Q14566	SP2	MCM6	NONE	0	0.740966
Q02086	Q14684	SP2	RRP1B	NONE	0	0.429453
Q02086	Q86X55	SP2	CARM1	NONE	1	3.74806
Q02086	Q8N163	SP2	CCAR2	NONE	0	0.63988
Q02086	Q8N7H5	SP2	PAF1	NONE	0	1.02723
Q02086	Q92598	SP2	HSPH1	NONE	1	4.49178
Q02086	Q93009	SP2	USP7	NONE	0	0.856416
Q02086	Q96B97	SP2	SH3KBP1	NONE	1	7.88972
Q02086	Q96EY1	SP2	DNAJA3	NONE	0	0.799819
Q02086	Q9GZS3	SP2	WDR61	NONE	0	0.766878
Q02086	Q9NVP1	SP2	DDX18	NONE	0	0.344496
Q02086	Q9Y5K6	SP2	CD2AP	NONE	1	36.0347
Q02386	O75190	ZNF45	DNAJB6	KRAB	0.93	2.55711
Q02386	P07199	ZNF45	CENPB	KRAB	0	1.08987
Q02386	P07858	ZNF45	CTSB	KRAB	0.56	1.61304
Q02386	P14373	ZNF45	TRIM27	KRAB	0	1.19186
Q02386	P17480	ZNF45	UBTF	KRAB	0.48	1.36988
Q02386	P63167	ZNF45	DYNLL1	KRAB	0.02	1.05004
Q02386	P63244	ZNF45	GNB2L1	KRAB	0	0.445848
Q02386	Q02386	ZNF45	ZNF45	KRAB	0	0.966765
Q02386	Q07021	ZNF45	C1QBP	KRAB	0	0.879987
Q02386	Q12769	ZNF45	NUP160	KRAB	0	0.879622
Q02386	Q13263	ZNF45	TRIM28	KRAB	1	18.04
Q02386	Q13428	ZNF45	TCOF1	KRAB	0	0.325443
Q02386	Q14592	ZNF45	ZNF460	KRAB	0	1.07715
Q02386	Q5H9R7	ZNF45	PPP6R3	KRAB	0	1.10951
Q02386	Q86WZ6	ZNF45	ZNF227	KRAB	0.48	1.73746
Q02386	Q8IZL8	ZNF45	PELP1	KRAB	0.07	1.23059
Q02386	Q8N7H5	ZNF45	PAF1	KRAB	0	1.0996
Q02386	Q96EY1	ZNF45	DNAJA3	KRAB	0	0.916738
Q02386	Q96T88	ZNF45	Q96T88	KRAB	1	3.64722
Q02386	Q9GZS3	ZNF45	WDR61	KRAB	0	1.07673
Q02386	Q9H7D7	ZNF45	WDR26	KRAB	0.4	1.63928
Q02386	Q9UL42	ZNF45	PNMA2	KRAB	1	2.9594
Q02386	Q9ULX6	ZNF45	AKAP8L	KRAB	0.33	1.61735
Q02386	Q9UN30	ZNF45	SCML1	KRAB	1	2.63439
Q02386	Q9Y4W2	ZNF45	LAS1L	KRAB	0.33	1.47891
Q03923	O43663	ZNF85	PRC1	KRAB	0	1.07291
Q03923	O75694	ZNF85	NUP155	KRAB	0.54	1.78438
Q03923	P02545	ZNF85	LMNA	KRAB	0	2.00046
Q03923	P07199	ZNF85	CENPB	KRAB	1	3.32238
Q03923	P07305	ZNF85	H1F0	KRAB	0.96	2.51018
Q03923	P07858	ZNF85	CTSB	KRAB	0.28	1.03909
Q03923	P12270	ZNF85	TPR	KRAB	0.05	2.49702
Q03923	P14373	ZNF85	TRIM27	KRAB	0.96	1.87467
Q03923	P17096	ZNF85	HMGA1	KRAB	0.01	1.10166
Q03923	P17480	ZNF85	UBTF	KRAB	1	6.41829
Q03923	P29590	ZNF85	PML	KRAB	0	1.04754
Q03923	P49916	ZNF85	LIG3	KRAB	0.73	2.18655
Q03923	P51784	ZNF85	USP11	KRAB	0.46	1.32914
Q03923	P61962	ZNF85	DCAF7	KRAB	0.73	1.99402
Q03923	P63167	ZNF85	DYNLL1	KRAB	0.02	0.78933
Q03923	P63244	ZNF85	GNB2L1	KRAB	0	0.222859
Q03923	P67775	ZNF85	PPP2CA	KRAB	0.24	1.5917
Q03923	Q02241	ZNF85	KIF23	KRAB	0.48	1.18593
Q03923	Q02880	ZNF85	TOP2B	KRAB	0.1	1.52053
Q03923	Q07021	ZNF85	C1QBP	KRAB	0	0.498347
Q03923	Q12769	ZNF85	NUP160	KRAB	0.26	1.19511
Q03923	Q12888	ZNF85	TP53BP1	KRAB	0	1.12181
Q03923	Q13263	ZNF85	TRIM28	KRAB	0	1.02111
Q03923	Q13428	ZNF85	TCOF1	KRAB	0.09	1.41867
Q03923	Q13547	ZNF85	HDAC1	KRAB	0	0.876338
Q03923	Q14566	ZNF85	MCM6	KRAB	0.05	1.26728
Q03923	Q14684	ZNF85	RRP1B	KRAB	0	0.40461
Q03923	Q14839	ZNF85	CHD4	KRAB	0	0.781451
Q03923	Q1ED39	ZNF85	KNOP1	KRAB	0.48	1.30714
Q03923	Q49A26	ZNF85	GLYR1	KRAB	0.46	1.42517
Q03923	Q5H9R7	ZNF85	PPP6R3	KRAB	1	2.76235
Q03923	Q5SY16	ZNF85	NOL9	KRAB	0	1.0941
Q03923	Q6PD62	ZNF85	CTR9	KRAB	0.48	1.61475
Q03923	Q7Z6Z7	ZNF85	HUWE1	KRAB	0.33	1.28254
Q03923	Q8IZL8	ZNF85	PELP1	KRAB	0.71	2.79658
Q03923	Q8N7H5	ZNF85	PAF1	KRAB	1	3.3678
Q03923	Q8N9M1	ZNF85	C19orf47	KRAB	0.5	2.44975
Q03923	Q8WVC0	ZNF85	LEO1	KRAB	0	1.10502
Q03923	Q8WYP5	ZNF85	AHCTF1	KRAB	0.5	2.80407
Q03923	Q92522	ZNF85	H1FX	KRAB	0.37	1.01853
Q03923	Q92769	ZNF85	HDAC2	KRAB	0	1.0986
Q03923	Q93009	ZNF85	USP7	KRAB	0.99	4.36302
Q03923	Q96T88	ZNF85	Q96T88	KRAB	0.46	1.2127
Q03923	Q9GZS3	ZNF85	WDR61	KRAB	0	0.739698
Q03923	Q9H6F5	ZNF85	CCDC86	KRAB	0.44	1.78253
Q03923	Q9H7D7	ZNF85	WDR26	KRAB	1	4.04584
Q03923	Q9NVP1	ZNF85	DDX18	KRAB	0.01	0.73394
Q03923	Q9NXF1	ZNF85	TEX10	KRAB	0.5	1.96614
Q03923	Q9NY12	ZNF85	GAR1	KRAB	0.56	1.42525
Q03923	Q9ULW0	ZNF85	TPX2	KRAB	0.49	1.64849
Q03923	Q9Y2S7	ZNF85	Q9Y2S7	KRAB	0	0.96536
Q03923	Q9Y4W2	ZNF85	LAS1L	KRAB	0.83	2.20538
Q06730	A6NFI3	ZNF33A	A6NFI3	KRAB	0.46	1.73823
Q06730	P07199	ZNF33A	CENPB	KRAB	0	1.17394
Q06730	P17480	ZNF33A	UBTF	KRAB	0	1.1965
Q06730	P63244	ZNF33A	GNB2L1	KRAB	0	0.994811
Q06730	Q07021	ZNF33A	C1QBP	KRAB	0	0.391486
Q06730	Q13263	ZNF33A	TRIM28	KRAB	1	19.2739
Q06730	Q13428	ZNF33A	TCOF1	KRAB	0	0.521561
Q06730	Q14566	ZNF33A	MCM6	KRAB	0	0.6973
Q06730	Q14588	ZNF33A	ZNF234	KRAB	0.48	1.74966
Q06730	Q14592	ZNF33A	ZNF460	KRAB	0.99	2.65347
Q06730	Q86WZ6	ZNF33A	ZNF227	KRAB	1	2.83025
Q06730	Q9UBW7	ZNF33A	ZMYM2	KRAB	0.48	1.46711
Q06730	Q9UL42	ZNF33A	PNMA2	KRAB	0	1.4278
Q06730	Q9ULX6	ZNF33A	AKAP8L	KRAB	0.17	1.58548
Q06730	Q9UN30	ZNF33A	SCML1	KRAB	1	3.01424
Q06889	O00505	EGR3	KPNA3	NONE	0	1.06811
Q06889	O00629	EGR3	KPNA4	NONE	0	1.10494
Q06889	O43663	EGR3	PRC1	NONE	0.46	1.2299
Q06889	O75489	EGR3	NDUFS3	NONE	0.05	0.949971
Q06889	O75694	EGR3	NUP155	NONE	0.91	2.47891
Q06889	P02545	EGR3	LMNA	NONE	0	0.501157
Q06889	P05204	EGR3	HMGN2	NONE	0.46	1.36736
Q06889	P07305	EGR3	H1F0	NONE	0.46	1.13703
Q06889	P07858	EGR3	CTSB	NONE	0	0.764605
Q06889	P13807	EGR3	GYS1	NONE	1	8.87572
Q06889	P17096	EGR3	HMGA1	NONE	0	0.554916
Q06889	P17980	EGR3	PSMC3	NONE	0.04	0.97
Q06889	P28482	EGR3	MAPK1	NONE	0.77	1.49183
Q06889	P49916	EGR3	LIG3	NONE	0.93	2.68526
Q06889	P51784	EGR3	USP11	NONE	0.46	1.20975
Q06889	P56545	EGR3	CTBP2	NONE	0	1.07461
Q06889	P61962	EGR3	DCAF7	NONE	0.1	0.833012
Q06889	P63167	EGR3	DYNLL1	NONE	0.06	0.807768
Q06889	P63244	EGR3	GNB2L1	NONE	0	0.667224
Q06889	P67775	EGR3	PPP2CA	NONE	0.47	1.41945
Q06889	Q02241	EGR3	KIF23	NONE	0	0.901176
Q06889	Q02880	EGR3	TOP2B	NONE	0	0.88112
Q06889	Q07021	EGR3	C1QBP	NONE	0	0.356809
Q06889	Q12769	EGR3	NUP160	NONE	0.26	1.03194
Q06889	Q13263	EGR3	TRIM28	NONE	0	0.285926
Q06889	Q13363	EGR3	CTBP1	NONE	0.91	1.63014
Q06889	Q13428	EGR3	TCOF1	NONE	0	0.59001
Q06889	Q13547	EGR3	HDAC1	NONE	0	0.887655
Q06889	Q14160	EGR3	SCRIB	NONE	0.46	1.22261
Q06889	Q14566	EGR3	MCM6	NONE	0	0.601848
Q06889	Q14684	EGR3	RRP1B	NONE	0	0.802783
Q06889	Q14839	EGR3	CHD4	NONE	0.08	0.828885
Q06889	Q49A26	EGR3	GLYR1	NONE	0.35	1.32089
Q06889	Q504T8	EGR3	MIDN	NONE	1	17.4523
Q06889	Q5H9R7	EGR3	PPP6R3	NONE	0	0.954451
Q06889	Q86X55	EGR3	CARM1	NONE	0.83	1.90117
Q06889	Q8TEM1	EGR3	NUP210	NONE	0.39	2.05313
Q06889	Q8WYP5	EGR3	AHCTF1	NONE	0.48	1.54229
Q06889	Q92522	EGR3	H1FX	NONE	0.29	0.829918
Q06889	Q92621	EGR3	NUP205	NONE	0	1.34852
Q06889	Q93009	EGR3	USP7	NONE	0.48	1.36264
Q06889	Q96EE3	EGR3	SEH1L	NONE	1	7.59439
Q06889	Q96EY1	EGR3	DNAJA3	NONE	0.81	1.39209
Q06889	Q9GZS3	EGR3	WDR61	NONE	0	0.640282
Q06889	Q9NQ55	EGR3	PPAN-P2RY11;PPAN	NONE	0	1.00809
Q06889	Q9NVP1	EGR3	DDX18	NONE	0	0.681855
Q06889	Q9NY12	EGR3	GAR1	NONE	0.28	1.11047
Q06889	Q9UNQ2	EGR3	DIMT1	NONE	0	0.98955
Q06889	Q9Y2R4	EGR3	DDX52	NONE	0	1.0926
Q06889	Q9Y2S7	EGR3	Q9Y2S7	NONE	0	0.886334
Q0VGE8	A6NFI3	ZNF816	A6NFI3	KRAB	0.48	1.93331
Q0VGE8	A8MTY0	ZNF816	ZNF724P	KRAB	0	1.44429
Q0VGE8	O00505	ZNF816	KPNA3	KRAB	0	1.18082
Q0VGE8	O14641	ZNF816	DVL2	KRAB	0	1.41514
Q0VGE8	O15350	ZNF816	TP73	KRAB	0	1.2163
Q0VGE8	O43242	ZNF816	PSMD3	KRAB	0	1.05195
Q0VGE8	O75190	ZNF816	DNAJB6	KRAB	0.86	2.61531
Q0VGE8	O95218	ZNF816	ZRANB2	KRAB	1	3.98646
Q0VGE8	P02545	ZNF816	LMNA	KRAB	0	1.28991
Q0VGE8	P07199	ZNF816	CENPB	KRAB	0.9	2.04124
Q0VGE8	P12270	ZNF816	TPR	KRAB	0	1.05469
Q0VGE8	P17028	ZNF816	ZNF24	KRAB	0.45	1.71245
Q0VGE8	P17029	ZNF816	ZKSCAN1	KRAB	0.98	2.72555
Q0VGE8	P17096	ZNF816	HMGA1	KRAB	0	0.790325
Q0VGE8	P17480	ZNF816	UBTF	KRAB	1	2.83731
Q0VGE8	P17980	ZNF816	PSMC3	KRAB	0.02	1.14454
Q0VGE8	P28482	ZNF816	MAPK1	KRAB	0	0.924608
Q0VGE8	P49916	ZNF816	LIG3	KRAB	0	0.968866
Q0VGE8	P52737	ZNF816	ZNF136	KRAB	0	1.21997
Q0VGE8	P56545	ZNF816	CTBP2	KRAB	0	1.0829
Q0VGE8	P61962	ZNF816	DCAF7	KRAB	0.05	1.04913
Q0VGE8	P62195	ZNF816	PSMC5	KRAB	0	1.13768
Q0VGE8	P63167	ZNF816	DYNLL1	KRAB	0	0.670421
Q0VGE8	P63244	ZNF816	GNB2L1	KRAB	0	0.203927
Q0VGE8	Q07021	ZNF816	C1QBP	KRAB	0	0.292408
Q0VGE8	Q12888	ZNF816	TP53BP1	KRAB	0.5	3.69991
Q0VGE8	Q13263	ZNF816	TRIM28	KRAB	1	8.88601
Q0VGE8	Q13363	ZNF816	CTBP1	KRAB	0	1.38714
Q0VGE8	Q13428	ZNF816	TCOF1	KRAB	0	1.08763
Q0VGE8	Q13547	ZNF816	HDAC1	KRAB	0	0.897946
Q0VGE8	Q13601	ZNF816	KRR1	KRAB	0	1.1672
Q0VGE8	Q14566	ZNF816	MCM6	KRAB	0	0.612114
Q0VGE8	Q14588	ZNF816	ZNF234	KRAB	0	1.19476
Q0VGE8	Q14592	ZNF816	ZNF460	KRAB	0.41	1.32355
Q0VGE8	Q14684	ZNF816	RRP1B	KRAB	0	0.585144
Q0VGE8	Q15072	ZNF816	ZNF146	KRAB	0	1.42749
Q0VGE8	Q1ED39	ZNF816	KNOP1	KRAB	0	1.15719
Q0VGE8	Q6PD62	ZNF816	CTR9	KRAB	0	1.19125
Q0VGE8	Q6ZN55	ZNF816	ZNF574	KRAB	0	1.20186
Q0VGE8	Q7Z6Z7	ZNF816	HUWE1	KRAB	0.1	1.42896
Q0VGE8	Q8IZL8	ZNF816	PELP1	KRAB	0	1.03316
Q0VGE8	Q8N163	ZNF816	CCAR2	KRAB	0	0.982914
Q0VGE8	Q8N7H5	ZNF816	PAF1	KRAB	0.5	2.76713
Q0VGE8	Q8WVC0	ZNF816	LEO1	KRAB	0.41	1.42335
Q0VGE8	Q8WYP5	ZNF816	AHCTF1	KRAB	0	1.18775
Q0VGE8	Q92522	ZNF816	H1FX	KRAB	0.03	0.972966
Q0VGE8	Q96JM3	ZNF816	CHAMP1	KRAB	0	1.21997
Q0VGE8	Q96T88	ZNF816	Q96T88	KRAB	1	2.98706
Q0VGE8	Q9BQ67	ZNF816	GRWD1	KRAB	0	0.888096
Q0VGE8	Q9H1E3	ZNF816	NUCKS1	KRAB	0	1.24243
Q0VGE8	Q9H2P0	ZNF816	ADNP	KRAB	0	1.17058
Q0VGE8	Q9H5H4	ZNF816	ZNF768	KRAB	0.5	2.22967
Q0VGE8	Q9NVP1	ZNF816	DDX18	KRAB	0	0.90125
Q0VGE8	Q9UL42	ZNF816	PNMA2	KRAB	0	1.10962
Q0VGE8	Q9ULX6	ZNF816	AKAP8L	KRAB	0.98	3.36144
Q0VGE8	Q9UN30	ZNF816	SCML1	KRAB	0.5	1.91101
Q13118	P57078	KLF10	RIPK4	NONE	0	1.51119
Q13118	P63244	KLF10	GNB2L1	NONE	0	0.598963
Q13118	Q13554	KLF10	CAMK2B	NONE	0	1.26438
Q13118	Q7Z5L9	KLF10	IRF2BP2	NONE	1	21.8531
Q13118	Q8IU81	KLF10	IRF2BP1	NONE	1	13.4067
Q13118	Q9H1B7	KLF10	IRF2BPL	NONE	1	5.31537
Q13351	O00629	KLF1	KPNA4	NONE	0.5	1.57317
Q13351	O43242	KLF1	PSMD3	NONE	0	1.09605
Q13351	O43663	KLF1	PRC1	NONE	0.98	2.40047
Q13351	O75489	KLF1	NDUFS3	NONE	0.15	0.974327
Q13351	O75694	KLF1	NUP155	NONE	0.1	0.731122
Q13351	P02545	KLF1	LMNA	NONE	0.5	2.64962
Q13351	P05204	KLF1	HMGN2	NONE	0.5	2.0286
Q13351	P07858	KLF1	CTSB	NONE	0	0.694577
Q13351	P12270	KLF1	TPR	NONE	0.01	1.26701
Q13351	P17096	KLF1	HMGA1	NONE	0.4	0.892068
Q13351	P17980	KLF1	PSMC3	NONE	0	0.60917
Q13351	P28482	KLF1	MAPK1	NONE	0.18	0.956648
Q13351	P29590	KLF1	PML	NONE	0	0.930376
Q13351	P49916	KLF1	LIG3	NONE	0.25	0.9156
Q13351	P50995	KLF1	ANXA11	NONE	0.49	2.1006
Q13351	P51610	KLF1	HCFC1	NONE	0	1.16624
Q13351	P51784	KLF1	USP11	NONE	0	0.783276
Q13351	P51858	KLF1	HDGF	NONE	0.5	2.60551
Q13351	P56545	KLF1	CTBP2	NONE	0.06	0.998221
Q13351	P60510	KLF1	PPP4C	NONE	0	1.09673
Q13351	P61962	KLF1	DCAF7	NONE	0.29	0.951303
Q13351	P63167	KLF1	DYNLL1	NONE	0	0.404111
Q13351	P63244	KLF1	GNB2L1	NONE	0	0.504595
Q13351	P67775	KLF1	PPP2CA	NONE	0.01	0.650403
Q13351	Q07021	KLF1	C1QBP	NONE	0.98	0.951374
Q13351	Q12769	KLF1	NUP160	NONE	0	0.558944
Q13351	Q13263	KLF1	TRIM28	NONE	0.36	0.806528
Q13351	Q13363	KLF1	CTBP1	NONE	0	0.944013
Q13351	Q13428	KLF1	TCOF1	NONE	0.24	0.628212
Q13351	Q14160	KLF1	SCRIB	NONE	0.48	1.29821
Q13351	Q14566	KLF1	MCM6	NONE	0	0.454465
Q13351	Q14684	KLF1	RRP1B	NONE	0	0.559833
Q13351	Q14839	KLF1	CHD4	NONE	0	0.612064
Q13351	Q504T8	KLF1	MIDN	NONE	1	10.1702
Q13351	Q7Z5L9	KLF1	IRF2BP2	NONE	0	1.11573
Q13351	Q86U42	KLF1	PABPN1	NONE	0	1.21007
Q13351	Q86X55	KLF1	CARM1	NONE	0.24	0.932645
Q13351	Q8N163	KLF1	CCAR2	NONE	0.2	0.941121
Q13351	Q92522	KLF1	H1FX	NONE	0.17	0.707454
Q13351	Q92598	KLF1	HSPH1	NONE	0.58	1.57461
Q13351	Q92621	KLF1	NUP205	NONE	0	1.07837
Q13351	Q93009	KLF1	USP7	NONE	0.47	1.65593
Q13351	Q96EY1	KLF1	DNAJA3	NONE	0.18	0.859835
Q13351	Q9BQ39	KLF1	DDX50	NONE	0.49	2.05197
Q13351	Q9BQ67	KLF1	GRWD1	NONE	0.35	0.999179
Q13351	Q9BTD8	KLF1	RBM42	NONE	0	1.1455
Q13351	Q9GZS3	KLF1	WDR61	NONE	0.12	0.810473
Q13351	Q9H1E3	KLF1	NUCKS1	NONE	0.45	1.44005
Q13351	Q9H2D6	KLF1	TRIOBP	NONE	0	1.1455
Q13351	Q9H6W3	KLF1	Q9H6W3	NONE	0.5	2.23823
Q13351	Q9NQ55	KLF1	PPAN-P2RY11;PPAN	NONE	0	0.958056
Q13351	Q9NQG5	KLF1	RPRD1B	NONE	0.45	1.4952
Q13351	Q9NVP1	KLF1	DDX18	NONE	0	0.566787
Q13351	Q9UL42	KLF1	PNMA2	NONE	0.45	1.05915
Q13351	Q9UNQ2	KLF1	DIMT1	NONE	0	0.937145
Q14593	A6NFI3	ZNF273	A6NFI3	KRAB	0.46	1.31677
Q14593	O00505	ZNF273	KPNA3	KRAB	0	1.08607
Q14593	O00629	ZNF273	KPNA4	KRAB	0	1.13839
Q14593	O14641	ZNF273	DVL2	KRAB	0.95	1.96158
Q14593	O43242	ZNF273	PSMD3	KRAB	0.99	4.73284
Q14593	O75190	ZNF273	DNAJB6	KRAB	0.5	1.38353
Q14593	O75694	ZNF273	NUP155	KRAB	0.06	0.897015
Q14593	P02545	ZNF273	LMNA	KRAB	0	0.875716
Q14593	P07199	ZNF273	CENPB	KRAB	1	5.98757
Q14593	P07858	ZNF273	CTSB	KRAB	0.28	0.96708
Q14593	P13533	ZNF273	MYH6	KRAB	1	6.93363
Q14593	P17029	ZNF273	ZKSCAN1	KRAB	0.99	2.78489
Q14593	P17096	ZNF273	HMGA1	KRAB	0	0.741322
Q14593	P17480	ZNF273	UBTF	KRAB	1	5.10052
Q14593	P17980	ZNF273	PSMC3	KRAB	0.82	2.23482
Q14593	P28482	ZNF273	MAPK1	KRAB	0.33	1.13078
Q14593	P51610	ZNF273	HCFC1	KRAB	0	1.194
Q14593	P51784	ZNF273	USP11	KRAB	0.46	1.06618
Q14593	P51858	ZNF273	HDGF	KRAB	0.2	1.91647
Q14593	P56545	ZNF273	CTBP2	KRAB	0	0.915104
Q14593	P61962	ZNF273	DCAF7	KRAB	0.99	2.1984
Q14593	P62195	ZNF273	PSMC5	KRAB	0	1.2211
Q14593	P62993	ZNF273	GRB2	KRAB	0.48	1.55685
Q14593	P63167	ZNF273	DYNLL1	KRAB	0.02	0.691111
Q14593	P63244	ZNF273	GNB2L1	KRAB	0	0.555418
Q14593	P67775	ZNF273	PPP2CA	KRAB	0.05	0.756967
Q14593	Q02386	ZNF273	ZNF45	KRAB	0	1.18614
Q14593	Q07021	ZNF273	C1QBP	KRAB	0	0.467557
Q14593	Q12888	ZNF273	TP53BP1	KRAB	1	10.3766
Q14593	Q13263	ZNF273	TRIM28	KRAB	1	2.32391
Q14593	Q13363	ZNF273	CTBP1	KRAB	0.46	1.2349
Q14593	Q13428	ZNF273	TCOF1	KRAB	0.18	0.804023
Q14593	Q13547	ZNF273	HDAC1	KRAB	0	0.797624
Q14593	Q13616	ZNF273	CUL1	KRAB	0	1.14108
Q14593	Q14566	ZNF273	MCM6	KRAB	0	0.655913
Q14593	Q14592	ZNF273	ZNF460	KRAB	1	4.28493
Q14593	Q14684	ZNF273	RRP1B	KRAB	0	0.721687
Q14593	Q15072	ZNF273	ZNF146	KRAB	0.49	1.76752
Q14593	Q15154	ZNF273	PCM1	KRAB	1	7.68647
Q14593	Q15654	ZNF273	TRIP6	KRAB	0.46	1.41941
Q14593	Q5CZA5	ZNF273	ZNF805	KRAB	0	1.25207
Q14593	Q5H9R7	ZNF273	PPP6R3	KRAB	1	2.22853
Q14593	Q5SY16	ZNF273	NOL9	KRAB	1	3.3132
Q14593	Q6ZN55	ZNF273	ZNF574	KRAB	0	1.12681
Q14593	Q7Z6Z7	ZNF273	HUWE1	KRAB	0.67	2.7627
Q14593	Q86WZ6	ZNF273	ZNF227	KRAB	0	1.17073
Q14593	Q8IZL8	ZNF273	PELP1	KRAB	1	4.75681
Q14593	Q8N163	ZNF273	CCAR2	KRAB	0	0.626388
Q14593	Q8N7H5	ZNF273	PAF1	KRAB	0.5	1.98798
Q14593	Q8TEM1	ZNF273	NUP210	KRAB	0	1.01854
Q14593	Q92522	ZNF273	H1FX	KRAB	0.06	0.617352
Q14593	Q92598	ZNF273	HSPH1	KRAB	0	0.470617
Q14593	Q92769	ZNF273	HDAC2	KRAB	0	1.21159
Q14593	Q93009	ZNF273	USP7	KRAB	0.18	0.934008
Q14593	Q96B97	ZNF273	SH3KBP1	KRAB	0	1.14108
Q14593	Q96EY1	ZNF273	DNAJA3	KRAB	0.47	1.16195
Q14593	Q96T88	ZNF273	Q96T88	KRAB	0.96	1.96693
Q14593	Q9BQ67	ZNF273	GRWD1	KRAB	0.48	1.19505
Q14593	Q9GZS3	ZNF273	WDR61	KRAB	0.07	0.818541
Q14593	Q9H1E3	ZNF273	NUCKS1	KRAB	0.48	1.46707
Q14593	Q9H2G4	ZNF273	TSPYL2	KRAB	1	4.23653
Q14593	Q9H7D7	ZNF273	WDR26	KRAB	0	0.819406
Q14593	Q9NVP1	ZNF273	DDX18	KRAB	0.02	1.0366
Q14593	Q9NXF1	ZNF273	TEX10	KRAB	0.5	1.94202
Q14593	Q9UL42	ZNF273	PNMA2	KRAB	0.48	1.36632
Q14593	Q9ULX6	ZNF273	AKAP8L	KRAB	0	0.801191
Q14593	Q9UN30	ZNF273	SCML1	KRAB	1	4.21429
Q14593	Q9Y2R4	ZNF273	DDX52	KRAB	0	0.92926
Q14593	Q9Y4W2	ZNF273	LAS1L	KRAB	1	4.52239
Q14593	Q9Y6V7	ZNF273	DDX49	KRAB	0	1.21003
Q15072	O00505	ZNF146	KPNA3	NONE	0	1.06744
Q15072	O43242	ZNF146	PSMD3	NONE	0	1.18937
Q15072	O43663	ZNF146	PRC1	NONE	0.46	1.44424
Q15072	O75190	ZNF146	DNAJB6	NONE	0.33	1.01543
Q15072	O75489	ZNF146	NDUFS3	NONE	0.55	1.79637
Q15072	O75694	ZNF146	NUP155	NONE	0.18	0.839454
Q15072	O95218	ZNF146	ZRANB2	NONE	0	1.32949
Q15072	O95394	ZNF146	PGM3	NONE	0.48	1.35725
Q15072	P07858	ZNF146	CTSB	NONE	0.28	0.925575
Q15072	P12270	ZNF146	TPR	NONE	0	1.19557
Q15072	P17029	ZNF146	ZKSCAN1	NONE	0.49	1.57314
Q15072	P17096	ZNF146	HMGA1	NONE	0	0.489719
Q15072	P17480	ZNF146	UBTF	NONE	0.48	1.19871
Q15072	P17980	ZNF146	PSMC3	NONE	0.94	2.55605
Q15072	P35251	ZNF146	RFC1	NONE	1	2.15819
Q15072	P49916	ZNF146	LIG3	NONE	0.8	1.77235
Q15072	P51784	ZNF146	USP11	NONE	1	2.46901
Q15072	P57078	ZNF146	RIPK4	NONE	0.81	1.88676
Q15072	P61962	ZNF146	DCAF7	NONE	0.21	0.955174
Q15072	P62195	ZNF146	PSMC5	NONE	0.72	2.86126
Q15072	P63167	ZNF146	DYNLL1	NONE	0.01	0.473644
Q15072	P63244	ZNF146	GNB2L1	NONE	0	0.448726
Q15072	P67775	ZNF146	PPP2CA	NONE	0.13	1.05628
Q15072	Q02241	ZNF146	KIF23	NONE	0.98	1.66498
Q15072	Q07021	ZNF146	C1QBP	NONE	0	0.31699
Q15072	Q12769	ZNF146	NUP160	NONE	0.34	1.0299
Q15072	Q13263	ZNF146	TRIM28	NONE	1	1.82287
Q15072	Q13428	ZNF146	TCOF1	NONE	0	0.376841
Q15072	Q13501	ZNF146	SQSTM1	NONE	1	6.87436
Q15072	Q13547	ZNF146	HDAC1	NONE	0	0.621743
Q15072	Q13616	ZNF146	CUL1	NONE	0	1.1273
Q15072	Q13618	ZNF146	CUL3	NONE	0	1.3862
Q15072	Q14160	ZNF146	SCRIB	NONE	0.46	1.03902
Q15072	Q14566	ZNF146	MCM6	NONE	0	0.768081
Q15072	Q15072	ZNF146	ZNF146	NONE	0	0.835155
Q15072	Q3KQU3	ZNF146	MAP7D1	NONE	0	1.13526
[truncated: 2,988 more rows]

## Sheet: Unfiltered list of interactions
Bait_UniProtID	Prey_UniProtID	Bait_GeneName	Prey_GeneName	Bait_EffectorDomain	SAINTexpress_AvgP	FoldChangeSPC	Filtering
A0PJY2	O00154	FEZF1	ACOT7	NONE	0	0.967313	non_nuclear
A0PJY2	O00505	FEZF1	KPNA3	NONE	0.98	2.95936	retained
A0PJY2	O00629	FEZF1	KPNA4	NONE	0.5	1.76651	retained
A0PJY2	O14744	FEZF1	PRMT5	NONE	0.87	2.15722	frequent_flier
A0PJY2	O43143	FEZF1	DHX15	NONE	0.72	1.27894	frequent_flier
A0PJY2	O43542	FEZF1	XRCC3	NONE	1	5.31537	retained
A0PJY2	O43663	FEZF1	PRC1	NONE	0.48	1.71682	retained
A0PJY2	O43813	FEZF1	LANCL1	NONE	0	1.16952	retained
A0PJY2	O60341	FEZF1	KDM1A	NONE	0	1.12186	retained
A0PJY2	O60506	FEZF1	SYNCRIP	NONE	0	0.613349	frequent_flier
A0PJY2	O60832	FEZF1	DKC1	NONE	0.23	1.20171	frequent_flier
A0PJY2	O60884	FEZF1	DNAJA2	NONE	0.98	1.62762	frequent_flier
A0PJY2	O75340	FEZF1	PDCD6	NONE	0.5	1.52583	non_nuclear
A0PJY2	O75489	FEZF1	NDUFS3	NONE	0.58	2.25667	retained
A0PJY2	O75694	FEZF1	NUP155	NONE	1	3.83102	retained
A0PJY2	O95394	FEZF1	PGM3	NONE	0	1.1418	retained
A0PJY2	P00966	FEZF1	ASS1	NONE	0	1.04292	non_nuclear
A0PJY2	P02545	FEZF1	LMNA	NONE	0	0.555673	retained
A0PJY2	P03244	FEZF1	P03244	NONE	1	10.8206	frequent_flier
A0PJY2	P04637	FEZF1	TP53	NONE	0.32	0.930619	frequent_flier
A0PJY2	P07199	FEZF1	CENPB	NONE	0	0.964601	retained
A0PJY2	P07858	FEZF1	CTSB	NONE	0.73	1.68536	retained
A0PJY2	P08559	FEZF1	PDHA1	NONE	0.02	0.752864	frequent_flier
A0PJY2	P09132	FEZF1	SRP19	NONE	0	1.1418	retained
A0PJY2	P09874	FEZF1	PARP1	NONE	1	1.27509	frequent_flier
A0PJY2	P11177	FEZF1	PDHB	NONE	0.73	1.53957	non_nuclear
A0PJY2	P11388	FEZF1	TOP2A	NONE	0.1	1.08653	frequent_flier
A0PJY2	P12268	FEZF1	IMPDH2	NONE	0.01	1.02403	frequent_flier
A0PJY2	P12956	FEZF1	XRCC6	NONE	0.6	1.11619	frequent_flier
A0PJY2	P13010	FEZF1	XRCC5	NONE	0.5	1.45537	frequent_flier
A0PJY2	P13489	FEZF1	RNH1	NONE	0	0.774889	non_nuclear
A0PJY2	P14373	FEZF1	TRIM27	NONE	0	1.36813	retained
A0PJY2	P15880	FEZF1	RPS2	NONE	0.16	0.661514	frequent_flier
A0PJY2	P17029	FEZF1	ZKSCAN1	NONE	0.41	1.60782	retained
A0PJY2	P17096	FEZF1	HMGA1	NONE	0	0.56058	retained
A0PJY2	P17480	FEZF1	UBTF	NONE	1	4.51418	retained
A0PJY2	P17812	FEZF1	CTPS1	NONE	0.99	1.47682	frequent_flier
A0PJY2	P17980	FEZF1	PSMC3	NONE	0.09	1.36158	retained
A0PJY2	P22087	FEZF1	FBL	NONE	0.61	0.981297	frequent_flier
A0PJY2	P23378	FEZF1	GLDC	NONE	0.9	2.00503	non_nuclear
A0PJY2	P27635	FEZF1	RPL10	NONE	0.98	1.38475	frequent_flier
A0PJY2	P28482	FEZF1	MAPK1	NONE	0.39	1.31632	retained
A0PJY2	P30153	FEZF1	PPP2R1A	NONE	1	1.97895	frequent_flier
A0PJY2	P31689	FEZF1	DNAJA1	NONE	0.79	1.05551	frequent_flier
A0PJY2	P33993	FEZF1	MCM7	NONE	0.86	1.60559	frequent_flier
A0PJY2	P35251	FEZF1	RFC1	NONE	0.45	1.30689	retained
A0PJY2	P35579	FEZF1	MYH9	NONE	0	0.641483	frequent_flier
A0PJY2	P35580	FEZF1	MYH10	NONE	1	2.53982	frequent_flier
A0PJY2	P36578	FEZF1	RPL4	NONE	0	0.430698	frequent_flier
A0PJY2	P46013	FEZF1	MKI67	NONE	0.97	3.10565	frequent_flier
A0PJY2	P47756	FEZF1	CAPZB	NONE	0	0.869787	non_nuclear
A0PJY2	P49366	FEZF1	DHPS	NONE	0.41	1.29962	non_nuclear
A0PJY2	P49916	FEZF1	LIG3	NONE	0.62	1.91099	retained
A0PJY2	P50570	FEZF1	DNM2	NONE	0	0.909937	non_nuclear
A0PJY2	P51570	FEZF1	GALK1	NONE	1	3.42146	non_nuclear
A0PJY2	P51784	FEZF1	USP11	NONE	1	2.42193	retained
A0PJY2	P52907	FEZF1	CAPZA1	NONE	0.01	0.985197	non_nuclear
A0PJY2	P53621	FEZF1	COPA	NONE	0	1.02486	non_nuclear
A0PJY2	P58107	FEZF1	P58107	NONE	0.93	3.43473	frequent_flier
A0PJY2	P60510	FEZF1	PPP4C	NONE	0.95	2.36853	retained
A0PJY2	P61962	FEZF1	DCAF7	NONE	1	4.45116	retained
A0PJY2	P62195	FEZF1	PSMC5	NONE	0	1.23766	retained
A0PJY2	P63151	FEZF1	PPP2R2A	NONE	1	1.81938	non_nuclear
A0PJY2	P63167	FEZF1	DYNLL1	NONE	0.01	0.722304	retained
A0PJY2	P63244	FEZF1	GNB2L1	NONE	0	0.7907	retained
A0PJY2	P67775	FEZF1	PPP2CA	NONE	0.91	2.42816	retained
A0PJY2	Q02241	FEZF1	KIF23	NONE	0.91	1.54829	retained
A0PJY2	Q02880	FEZF1	TOP2B	NONE	0	0.780869	retained
A0PJY2	Q04724	FEZF1	TLE1	NONE	0.5	2.06523	retained
A0PJY2	Q04726	FEZF1	TLE3	NONE	0.92	3.15768	retained
A0PJY2	Q06210	FEZF1	GFPT1	NONE	0.09	1.2666	non_nuclear
A0PJY2	Q07021	FEZF1	C1QBP	NONE	0	0.604667	retained
A0PJY2	Q07666	FEZF1	KHDRBS1	NONE	0	0.639123	frequent_flier
A0PJY2	Q12769	FEZF1	NUP160	NONE	0.73	2.28992	retained
A0PJY2	Q12789	FEZF1	GTF3C1	NONE	0.45	1.31425	non_nuclear
A0PJY2	Q12888	FEZF1	TP53BP1	NONE	0.48	1.57102	retained
A0PJY2	Q13162	FEZF1	PRDX4	NONE	0	0.869615	non_nuclear
A0PJY2	Q13263	FEZF1	TRIM28	NONE	0.51	1.88139	retained
A0PJY2	Q13363	FEZF1	CTBP1	NONE	0.5	1.68924	retained
A0PJY2	Q13428	FEZF1	TCOF1	NONE	0	0.85116	retained
A0PJY2	Q13547	FEZF1	HDAC1	NONE	0	0.967531	retained
A0PJY2	Q13557	FEZF1	CAMK2D	NONE	0	1.43537	retained
A0PJY2	Q13616	FEZF1	CUL1	NONE	0.41	1.63658	retained
A0PJY2	Q13618	FEZF1	CUL3	NONE	0	1.16247	retained
A0PJY2	Q13643	FEZF1	FHL3	NONE	0.41	1.72936	retained
A0PJY2	Q14160	FEZF1	SCRIB	NONE	0.98	2.05994	retained
A0PJY2	Q14257	FEZF1	RCN2	NONE	0.97	2.00671	frequent_flier
A0PJY2	Q14566	FEZF1	MCM6	NONE	0.01	1.4642	retained
A0PJY2	Q14676	FEZF1	MDC1	NONE	1	6.06006	frequent_flier
A0PJY2	Q14684	FEZF1	RRP1B	NONE	0	0.757169	retained
A0PJY2	Q14690	FEZF1	PDCD11	NONE	0.93	2.82473	frequent_flier
A0PJY2	Q14839	FEZF1	CHD4	NONE	0.24	1.68074	retained
A0PJY2	Q14978	FEZF1	NOLC1	NONE	0.07	0.834267	frequent_flier
A0PJY2	Q14980	FEZF1	NUMA1	NONE	1	4.3137	frequent_flier
A0PJY2	Q15654	FEZF1	TRIP6	NONE	1	10.6746	retained
A0PJY2	Q16718	FEZF1	NDUFA5	NONE	0.91	1.42262	non_nuclear
A0PJY2	Q3ZCQ8	FEZF1	TIMM50	NONE	0.59	1.1436	frequent_flier
A0PJY2	Q49A26	FEZF1	GLYR1	NONE	0.85	1.99911	retained
A0PJY2	Q53H96	FEZF1	PYCRL	NONE	0.5	1.4898	non_nuclear
A0PJY2	Q5H9R7	FEZF1	PPP6R3	NONE	1	2.26194	retained
A0PJY2	Q5SY16	FEZF1	NOL9	NONE	0.95	1.98272	retained
A0PJY2	Q6PD62	FEZF1	CTR9	NONE	0.5	1.82613	retained
A0PJY2	Q7Z5L9	FEZF1	IRF2BP2	NONE	0	1.16247	retained
A0PJY2	Q7Z6Z7	FEZF1	HUWE1	NONE	1	6.85585	retained
A0PJY2	Q7Z7K6	FEZF1	CENPV	NONE	0.64	2.02522	frequent_flier
A0PJY2	Q86V81	FEZF1	ALYREF	NONE	0	0.725147	frequent_flier
A0PJY2	Q8IZL8	FEZF1	PELP1	NONE	0.52	2.13206	retained
A0PJY2	Q8N163	FEZF1	CCAR2	NONE	0.5	1.62913	retained
A0PJY2	Q8N7H5	FEZF1	PAF1	NONE	1	5.34781	retained
A0PJY2	Q8NFW8	FEZF1	CMAS	NONE	0	1.07792	retained
A0PJY2	Q8WVC0	FEZF1	LEO1	NONE	0.5	2.23529	retained
A0PJY2	Q92504	FEZF1	SLC39A7	NONE	0	1.00484	non_nuclear
A0PJY2	Q92522	FEZF1	H1FX	NONE	0.1	0.837099	retained
A0PJY2	Q92598	FEZF1	HSPH1	NONE	1	4.03376	retained
A0PJY2	Q92769	FEZF1	HDAC2	NONE	0.02	1.42262	retained
A0PJY2	Q93008	FEZF1	USP9X	NONE	1	5.8747	frequent_flier
A0PJY2	Q93009	FEZF1	USP7	NONE	0.78	2.30169	retained
A0PJY2	Q96EE3	FEZF1	SEH1L	NONE	0.87	6.37008	retained
A0PJY2	Q96EY1	FEZF1	DNAJA3	NONE	0	0.730538	retained
A0PJY2	Q96PV6	FEZF1	LENG8	NONE	0	1.07792	retained
A0PJY2	Q96T88	FEZF1	Q96T88	NONE	1	2.6169	retained
A0PJY2	Q99627	FEZF1	COPS8	NONE	0	1.22921	retained
A0PJY2	Q9BQ67	FEZF1	GRWD1	NONE	0.63	1.6595	retained
A0PJY2	Q9BQA1	FEZF1	WDR77	NONE	0.98	2.4706	frequent_flier
A0PJY2	Q9BRP1	FEZF1	PDCD2L	NONE	0	0.931942	non_nuclear
A0PJY2	Q9BSD7	FEZF1	NTPCR	NONE	0.25	1.17953	non_nuclear
A0PJY2	Q9BSJ8	FEZF1	ESYT1	NONE	1	5.15757	non_nuclear
A0PJY2	Q9BVP2	FEZF1	GNL3	NONE	0.49	1.21585	frequent_flier
A0PJY2	Q9BY77	FEZF1	POLDIP3	NONE	0	0.622026	frequent_flier
A0PJY2	Q9GZS3	FEZF1	WDR61	NONE	1	3.21036	retained
A0PJY2	Q9H2D6	FEZF1	TRIOBP	NONE	0	1.18389	retained
A0PJY2	Q9H6R4	FEZF1	NOL6	NONE	0.98	2.8176	frequent_flier
A0PJY2	Q9H7D7	FEZF1	WDR26	NONE	0.12	1.19494	retained
A0PJY2	Q9H857	FEZF1	NT5DC2	NONE	0.61	2.05118	non_nuclear
A0PJY2	Q9HCC0	FEZF1	MCCC2	NONE	0.01	1.00802	non_nuclear
A0PJY2	Q9NNW5	FEZF1	WDR6	NONE	0	1.21372	non_nuclear
A0PJY2	Q9NP81	FEZF1	SARS2	NONE	0.74	1.81633	frequent_flier
A0PJY2	Q9NR30	FEZF1	DDX21	NONE	0	0.507242	frequent_flier
A0PJY2	Q9NUP9	FEZF1	LIN7C	NONE	0	0.955039	non_nuclear
A0PJY2	Q9NVP1	FEZF1	DDX18	NONE	0.23	1.21524	retained
A0PJY2	Q9NY12	FEZF1	GAR1	NONE	0.65	1.71445	retained
A0PJY2	Q9P2R7	FEZF1	SUCLA2	NONE	0	1.03024	non_nuclear
A0PJY2	Q9UBW7	FEZF1	ZMYM2	NONE	1	3.55681	retained
A0PJY2	Q9UGI8	FEZF1	TES	NONE	0.18	1.3292	retained
A0PJY2	Q9UKN8	FEZF1	GTF3C4	NONE	0	1.20613	retained
A0PJY2	Q9UL42	FEZF1	PNMA2	NONE	0.95	1.80224	retained
A0PJY2	Q9ULX6	FEZF1	AKAP8L	NONE	0.09	1.16949	retained
A0PJY2	Q9UN30	FEZF1	SCML1	NONE	0	1.29962	retained
A0PJY2	Q9UNE7	FEZF1	STUB1	NONE	0.26	1.07729	frequent_flier
A0PJY2	Q9Y230	FEZF1	RUVBL2	NONE	0.28	1.06264	frequent_flier
A0PJY2	Q9Y265	FEZF1	RUVBL1	NONE	0.41	1.13572	frequent_flier
A0PJY2	Q9Y2R4	FEZF1	DDX52	NONE	0	1.14654	retained
A0PJY2	Q9Y2S7	FEZF1	Q9Y2S7	NONE	1	4.09934	retained
A0PJY2	Q9Y4W2	FEZF1	LAS1L	NONE	0.72	1.92812	retained
A0PJY2	Q9Y5Q8	FEZF1	GTF3C5	NONE	0	1.13507	retained
A0PJY2	Q9Y5Y2	FEZF1	NUBP2	NONE	0.48	1.4545	non_nuclear
A0PJY2	RM	FEZF1	RM	NONE	0	0.436911	non_nuclear
A2RRD8	O00154	ZNF320	ACOT7	KRAB	0	0.925113	non_nuclear
A2RRD8	O00505	ZNF320	KPNA3	KRAB	0.48	1.81943	retained
A2RRD8	O00629	ZNF320	KPNA4	KRAB	0	0.97893	retained
A2RRD8	O14641	ZNF320	DVL2	KRAB	0	1.08863	retained
A2RRD8	O14744	ZNF320	PRMT5	KRAB	1	3.48448	frequent_flier
A2RRD8	O43143	ZNF320	DHX15	KRAB	0	0.609154	frequent_flier
A2RRD8	O43663	ZNF320	PRC1	KRAB	0	1.29352	retained
A2RRD8	O60341	ZNF320	KDM1A	KRAB	0	1.13487	retained
A2RRD8	O60506	ZNF320	SYNCRIP	KRAB	0	0.400957	frequent_flier
A2RRD8	O60684	ZNF320	KPNA6	KRAB	0	1.12294	non_nuclear
A2RRD8	O60884	ZNF320	DNAJA2	KRAB	0.52	1.38159	frequent_flier
A2RRD8	O75340	ZNF320	PDCD6	KRAB	0.45	1.36359	non_nuclear
A2RRD8	O75489	ZNF320	NDUFS3	KRAB	0	0.754347	retained
A2RRD8	O75694	ZNF320	NUP155	KRAB	0.05	1.11257	retained
A2RRD8	P02545	ZNF320	LMNA	KRAB	0	0.713205	retained
A2RRD8	P03244	ZNF320	P03244	KRAB	1	13.8399	frequent_flier
A2RRD8	P04637	ZNF320	TP53	KRAB	0.05	0.601731	frequent_flier
A2RRD8	P07858	ZNF320	CTSB	KRAB	0.73	1.74664	retained
A2RRD8	P08559	ZNF320	PDHA1	KRAB	0	0.64286	frequent_flier
A2RRD8	P09874	ZNF320	PARP1	KRAB	0.99	1.53987	frequent_flier
A2RRD8	P11177	ZNF320	PDHB	KRAB	0.27	0.997534	non_nuclear
A2RRD8	P11388	ZNF320	TOP2A	KRAB	0.36	1.19094	frequent_flier
A2RRD8	P12268	ZNF320	IMPDH2	KRAB	0	0.420427	frequent_flier
A2RRD8	P12270	ZNF320	TPR	KRAB	0	0.915997	retained
A2RRD8	P12956	ZNF320	XRCC6	KRAB	0.21	0.814103	frequent_flier
A2RRD8	P13010	ZNF320	XRCC5	KRAB	0.47	1.35254	frequent_flier
A2RRD8	P13489	ZNF320	RNH1	KRAB	0	0.746846	non_nuclear
A2RRD8	P15880	ZNF320	RPS2	KRAB	0.85	0.897918	frequent_flier
A2RRD8	P17096	ZNF320	HMGA1	KRAB	0.05	1.23095	retained
A2RRD8	P17480	ZNF320	UBTF	KRAB	1	3.26791	retained
A2RRD8	P17812	ZNF320	CTPS1	KRAB	0.99	1.65489	frequent_flier
A2RRD8	P20674	ZNF320	COX5A	KRAB	0	0.781946	non_nuclear
A2RRD8	P22087	ZNF320	FBL	KRAB	0	0.477261	frequent_flier
A2RRD8	P27635	ZNF320	RPL10	KRAB	1	1.69733	frequent_flier
A2RRD8	P30153	ZNF320	PPP2R1A	KRAB	0	0.588507	frequent_flier
A2RRD8	P31689	ZNF320	DNAJA1	KRAB	1	1.8358	frequent_flier
A2RRD8	P33993	ZNF320	MCM7	KRAB	0.85	1.9497	frequent_flier
A2RRD8	P35251	ZNF320	RFC1	KRAB	0.45	1.32663	retained
A2RRD8	P35579	ZNF320	MYH9	KRAB	0	0.735755	frequent_flier
A2RRD8	P35580	ZNF320	MYH10	KRAB	0.99	2.37404	frequent_flier
A2RRD8	P36578	ZNF320	RPL4	KRAB	0	0.71353	frequent_flier
A2RRD8	P38432	ZNF320	COIL	KRAB	0	1.17868	retained
A2RRD8	P40616	ZNF320	ARL1	KRAB	0.45	1.60001	non_nuclear
A2RRD8	P46013	ZNF320	MKI67	KRAB	0.51	2.38621	frequent_flier
A2RRD8	P47756	ZNF320	CAPZB	KRAB	0	0.501322	non_nuclear
A2RRD8	P49916	ZNF320	LIG3	KRAB	0.25	1.13915	retained
A2RRD8	P51784	ZNF320	USP11	KRAB	0.48	1.51269	retained
A2RRD8	P52907	ZNF320	CAPZA1	KRAB	0	0.804929	non_nuclear
A2RRD8	P53621	ZNF320	COPA	KRAB	0	0.586635	non_nuclear
A2RRD8	P58107	ZNF320	P58107	KRAB	0.5	1.75505	frequent_flier
A2RRD8	P60510	ZNF320	PPP4C	KRAB	0	1.1595	retained
A2RRD8	P62195	ZNF320	PSMC5	KRAB	0.01	1.26202	retained
A2RRD8	P63151	ZNF320	PPP2R2A	KRAB	0	0.342284	non_nuclear
A2RRD8	P63167	ZNF320	DYNLL1	KRAB	0.01	0.771907	retained
A2RRD8	P63244	ZNF320	GNB2L1	KRAB	0	0.937405	retained
A2RRD8	Q02241	ZNF320	KIF23	KRAB	0.45	1.1761	retained
A2RRD8	Q02386	ZNF320	ZNF45	KRAB	0.91	1.96227	retained
A2RRD8	Q06210	ZNF320	GFPT1	KRAB	0.86	2.4726	non_nuclear
A2RRD8	Q07021	ZNF320	C1QBP	KRAB	0	0.649817	retained
A2RRD8	Q07666	ZNF320	KHDRBS1	KRAB	0.09	1.04906	frequent_flier
A2RRD8	Q12769	ZNF320	NUP160	KRAB	0	0.871521	retained
A2RRD8	Q12789	ZNF320	GTF3C1	KRAB	0	1.09983	non_nuclear
A2RRD8	Q13011	ZNF320	ECH1	KRAB	0	1.28315	non_nuclear
A2RRD8	Q13162	ZNF320	PRDX4	KRAB	0	0.782551	non_nuclear
A2RRD8	Q13188	ZNF320	STK3	KRAB	0.99	2.9313	non_nuclear
A2RRD8	Q13263	ZNF320	TRIM28	KRAB	1	9.36663	retained
A2RRD8	Q13428	ZNF320	TCOF1	KRAB	0	0.300819	retained
A2RRD8	Q13547	ZNF320	HDAC1	KRAB	0	0.711648	retained
A2RRD8	Q14257	ZNF320	RCN2	KRAB	0.78	1.75022	frequent_flier
A2RRD8	Q14566	ZNF320	MCM6	KRAB	0	1.09488	retained
A2RRD8	Q14676	ZNF320	MDC1	KRAB	0.56	2.6489	frequent_flier
A2RRD8	Q14684	ZNF320	RRP1B	KRAB	0	0.562556	retained
A2RRD8	Q14690	ZNF320	PDCD11	KRAB	0.59	2.1186	frequent_flier
A2RRD8	Q14839	ZNF320	CHD4	KRAB	0.04	1.09808	retained
A2RRD8	Q14978	ZNF320	NOLC1	KRAB	0.5	1.18053	frequent_flier
A2RRD8	Q14980	ZNF320	NUMA1	KRAB	0.55	2.5056	frequent_flier
A2RRD8	Q3ZCQ8	ZNF320	TIMM50	KRAB	1	3.23206	frequent_flier
A2RRD8	Q49A26	ZNF320	GLYR1	KRAB	0.25	1.20341	retained
A2RRD8	Q53H96	ZNF320	PYCRL	KRAB	0.25	1.13489	non_nuclear
A2RRD8	Q5H9R7	ZNF320	PPP6R3	KRAB	1	2.52713	retained
A2RRD8	Q7Z6Z7	ZNF320	HUWE1	KRAB	0.26	1.55149	retained
A2RRD8	Q7Z7K6	ZNF320	CENPV	KRAB	0.51	1.52666	frequent_flier
A2RRD8	Q86V81	ZNF320	ALYREF	KRAB	0	0.901419	frequent_flier
A2RRD8	Q8N163	ZNF320	CCAR2	KRAB	0	1.01008	retained
A2RRD8	Q8N7H5	ZNF320	PAF1	KRAB	0.91	2.49159	retained
A2RRD8	Q92504	ZNF320	SLC39A7	KRAB	0	1.24384	non_nuclear
A2RRD8	Q92522	ZNF320	H1FX	KRAB	0.21	0.996379	retained
A2RRD8	Q93008	ZNF320	USP9X	KRAB	1	6.95225	frequent_flier
A2RRD8	Q93009	ZNF320	USP7	KRAB	0.2	1.34418	retained
A2RRD8	Q96EY1	ZNF320	DNAJA3	KRAB	0.76	1.73413	retained
A2RRD8	Q96PV6	ZNF320	LENG8	KRAB	0.41	1.32663	retained
A2RRD8	Q96RT1	ZNF320	ERBB2IP	KRAB	0.41	1.49501	retained
A2RRD8	Q9BQA1	ZNF320	WDR77	KRAB	1	3.29497	frequent_flier
A2RRD8	Q9BSD7	ZNF320	NTPCR	KRAB	0.25	1.0393	non_nuclear
A2RRD8	Q9BTT6	ZNF320	LRRC1	KRAB	0.98	2.71082	non_nuclear
A2RRD8	Q9BVP2	ZNF320	GNL3	KRAB	0.15	1.03311	frequent_flier
A2RRD8	Q9BY77	ZNF320	POLDIP3	KRAB	0	0.54479	frequent_flier
A2RRD8	Q9GZS3	ZNF320	WDR61	KRAB	0.41	1.65728	retained
A2RRD8	Q9H4B6	ZNF320	SAV1	KRAB	1	4.04431	retained
A2RRD8	Q9H6R4	ZNF320	NOL6	KRAB	0.49	1.52856	frequent_flier
A2RRD8	Q9H6S0	ZNF320	YTHDC2	KRAB	0.05	1.40123	retained
A2RRD8	Q9NP81	ZNF320	SARS2	KRAB	0.25	1.10113	frequent_flier
A2RRD8	Q9NR30	ZNF320	DDX21	KRAB	0.5	0.814473	frequent_flier
A2RRD8	Q9NRL2	ZNF320	BAZ1A	KRAB	0	1.14093	retained
A2RRD8	Q9NVP1	ZNF320	DDX18	KRAB	0	0.581082	retained
A2RRD8	Q9P2R7	ZNF320	SUCLA2	KRAB	0.12	1.25151	non_nuclear
A2RRD8	Q9UL42	ZNF320	PNMA2	KRAB	0.95	2.47997	retained
A2RRD8	Q9ULT8	ZNF320	HECTD1	KRAB	1	5.42396	retained
A2RRD8	Q9ULX6	ZNF320	AKAP8L	KRAB	0.18	1.39231	retained
A2RRD8	Q9UN30	ZNF320	SCML1	KRAB	1	2.93858	retained
A2RRD8	Q9UNE7	ZNF320	STUB1	KRAB	0	0.605953	frequent_flier
A2RRD8	Q9Y230	ZNF320	RUVBL2	KRAB	0.03	0.973147	frequent_flier
A2RRD8	Q9Y265	ZNF320	RUVBL1	KRAB	0	0.763504	frequent_flier
A2RRD8	Q9Y2R4	ZNF320	DDX52	KRAB	0.99	2.41243	retained
A2RRD8	Q9Y2S7	ZNF320	Q9Y2S7	KRAB	0	0.957013	retained
A2RRD8	Q9Y4W2	ZNF320	LAS1L	KRAB	0.09	1.06356	retained
A2RRD8	RM	ZNF320	RM	KRAB	0	0.355085	non_nuclear
A6NGD5	A6NJL1	ZSCAN5C	ZSCAN5B	SCAN	1	3.6971	retained
A6NGD5	O00154	ZSCAN5C	ACOT7	SCAN	0.01	0.870761	non_nuclear
A6NGD5	O00505	ZSCAN5C	KPNA3	SCAN	0	1.07061	retained
A6NGD5	O14641	ZSCAN5C	DVL2	SCAN	0	1.04335	retained
A6NGD5	O14744	ZSCAN5C	PRMT5	SCAN	1	2.44806	frequent_flier
A6NGD5	O43143	ZSCAN5C	DHX15	SCAN	0	0.363519	frequent_flier
A6NGD5	O43242	ZSCAN5C	PSMD3	SCAN	0	0.840088	retained
A6NGD5	O43663	ZSCAN5C	PRC1	SCAN	0.5	1.88192	retained
A6NGD5	O60341	ZSCAN5C	KDM1A	SCAN	1	9.03908	retained
A6NGD5	O60506	ZSCAN5C	SYNCRIP	SCAN	0	0.379057	frequent_flier
A6NGD5	O60832	ZSCAN5C	DKC1	SCAN	0.01	0.713426	frequent_flier
A6NGD5	O60884	ZSCAN5C	DNAJA2	SCAN	0.01	0.707858	frequent_flier
A6NGD5	O75362	ZSCAN5C	ZNF217	SCAN	1	3.42739	retained
A6NGD5	O75489	ZSCAN5C	NDUFS3	SCAN	0.02	0.956666	retained
A6NGD5	O75694	ZSCAN5C	NUP155	SCAN	0.11	1.06913	retained
A6NGD5	P00966	ZSCAN5C	ASS1	SCAN	0.45	1.44073	non_nuclear
A6NGD5	P03244	ZSCAN5C	P03244	SCAN	1	5.24749	frequent_flier
A6NGD5	P04637	ZSCAN5C	TP53	SCAN	0	0.400334	frequent_flier
A6NGD5	P08559	ZSCAN5C	PDHA1	SCAN	0	0.531205	frequent_flier
A6NGD5	P09132	ZSCAN5C	SRP19	SCAN	0	1.36024	retained
A6NGD5	P09874	ZSCAN5C	PARP1	SCAN	0	0.61387	frequent_flier
A6NGD5	P11388	ZSCAN5C	TOP2A	SCAN	0	0.197263	frequent_flier
A6NGD5	P12268	ZSCAN5C	IMPDH2	SCAN	0	0.747303	frequent_flier
A6NGD5	P12270	ZSCAN5C	TPR	SCAN	0	0.844417	retained
A6NGD5	P12532	ZSCAN5C	CKMT1A;CKMT1B	SCAN	0	0.815017	non_nuclear
A6NGD5	P12956	ZSCAN5C	XRCC6	SCAN	0	0.46459	frequent_flier
A6NGD5	P13010	ZSCAN5C	XRCC5	SCAN	0	0.652899	frequent_flier
A6NGD5	P13489	ZSCAN5C	RNH1	SCAN	0.14	0.973635	non_nuclear
A6NGD5	P15880	ZSCAN5C	RPS2	SCAN	0	0.269851	frequent_flier
A6NGD5	P17096	ZSCAN5C	HMGA1	SCAN	0	0.561231	retained
A6NGD5	P17480	ZSCAN5C	UBTF	SCAN	0.95	1.83632	retained
A6NGD5	P17812	ZSCAN5C	CTPS1	SCAN	0.41	0.98477	frequent_flier
A6NGD5	P20674	ZSCAN5C	COX5A	SCAN	0	0.997539	non_nuclear
A6NGD5	P22087	ZSCAN5C	FBL	SCAN	0	0.262907	frequent_flier
A6NGD5	P23378	ZSCAN5C	GLDC	SCAN	0	1.28129	non_nuclear
A6NGD5	P27635	ZSCAN5C	RPL10	SCAN	0.41	0.883324	frequent_flier
A6NGD5	P29590	ZSCAN5C	PML	SCAN	0	0.9868	retained
A6NGD5	P30153	ZSCAN5C	PPP2R1A	SCAN	0.22	0.980219	frequent_flier
A6NGD5	P31689	ZSCAN5C	DNAJA1	SCAN	0	0.455051	frequent_flier
A6NGD5	P33993	ZSCAN5C	MCM7	SCAN	0	0.391975	frequent_flier
A6NGD5	P35579	ZSCAN5C	MYH9	SCAN	0	0.442556	frequent_flier
A6NGD5	P35580	ZSCAN5C	MYH10	SCAN	1	1.72035	frequent_flier
A6NGD5	P36578	ZSCAN5C	RPL4	SCAN	0	0.245486	frequent_flier
A6NGD5	P46013	ZSCAN5C	MKI67	SCAN	0.02	0.691668	frequent_flier
A6NGD5	P47756	ZSCAN5C	CAPZB	SCAN	0	0.873011	non_nuclear
A6NGD5	P49366	ZSCAN5C	DHPS	SCAN	0	1.04335	non_nuclear
A6NGD5	P49916	ZSCAN5C	LIG3	SCAN	0.41	1.32904	retained
A6NGD5	P51570	ZSCAN5C	GALK1	SCAN	0.18	0.932487	non_nuclear
A6NGD5	P52907	ZSCAN5C	CAPZA1	SCAN	0.12	1.40725	non_nuclear
A6NGD5	P58107	ZSCAN5C	P58107	SCAN	0.08	0.730919	frequent_flier
A6NGD5	P61962	ZSCAN5C	DCAF7	SCAN	0.1	0.96487	retained
A6NGD5	P63151	ZSCAN5C	PPP2R2A	SCAN	0.96	1.29974	non_nuclear
A6NGD5	P63167	ZSCAN5C	DYNLL1	SCAN	1	2.32927	retained
A6NGD5	P63244	ZSCAN5C	GNB2L1	SCAN	0	0.486901	retained
A6NGD5	P67775	ZSCAN5C	PPP2CA	SCAN	0.09	1.21651	retained
A6NGD5	Q02241	ZSCAN5C	KIF23	SCAN	0.45	1.0973	retained
A6NGD5	Q06210	ZSCAN5C	GFPT1	SCAN	0	0.844417	non_nuclear
A6NGD5	Q07021	ZSCAN5C	C1QBP	SCAN	0	0.583922	retained
A6NGD5	Q07666	ZSCAN5C	KHDRBS1	SCAN	0	0.464757	frequent_flier
A6NGD5	Q13011	ZSCAN5C	ECH1	SCAN	0	1.00311	non_nuclear
A6NGD5	Q13162	ZSCAN5C	PRDX4	SCAN	0	0.256476	non_nuclear
A6NGD5	Q13263	ZSCAN5C	TRIM28	SCAN	0	0.585914	retained
A6NGD5	Q13428	ZSCAN5C	TCOF1	SCAN	0	0.776523	retained
A6NGD5	Q13547	ZSCAN5C	HDAC1	SCAN	0	0.627698	retained
A6NGD5	Q14160	ZSCAN5C	SCRIB	SCAN	0	1.04533	retained
A6NGD5	Q14257	ZSCAN5C	RCN2	SCAN	0	0.390102	frequent_flier
A6NGD5	Q14566	ZSCAN5C	MCM6	SCAN	0	0.324599	retained
A6NGD5	Q14676	ZSCAN5C	MDC1	SCAN	0.43	1.39473	frequent_flier
A6NGD5	Q14684	ZSCAN5C	RRP1B	SCAN	0	0.465049	retained
A6NGD5	Q14690	ZSCAN5C	PDCD11	SCAN	0.03	0.596613	frequent_flier
A6NGD5	Q14978	ZSCAN5C	NOLC1	SCAN	0	0.615494	frequent_flier
A6NGD5	Q14980	ZSCAN5C	NUMA1	SCAN	0	0.561133	frequent_flier
A6NGD5	Q3ZCQ8	ZSCAN5C	TIMM50	SCAN	0	0.504375	frequent_flier
A6NGD5	Q49A26	ZSCAN5C	GLYR1	SCAN	0.5	1.52388	retained
A6NGD5	Q53H96	ZSCAN5C	PYCRL	SCAN	0	1.05086	non_nuclear
A6NGD5	Q5H9R7	ZSCAN5C	PPP6R3	SCAN	0.45	1.36493	retained
A6NGD5	Q5VZL5	ZSCAN5C	ZMYM4	SCAN	1	43.1118	non_nuclear
A6NGD5	Q6UB35	ZSCAN5C	MTHFD1L	SCAN	0	1.12193	non_nuclear
A6NGD5	Q7Z7K6	ZSCAN5C	CENPV	SCAN	0.19	0.990113	frequent_flier
A6NGD5	Q86V81	ZSCAN5C	ALYREF	SCAN	0	0.41388	frequent_flier
A6NGD5	Q86X55	ZSCAN5C	CARM1	SCAN	0	0.840088	retained
A6NGD5	Q8N163	ZSCAN5C	CCAR2	SCAN	0	0.675694	retained
A6NGD5	Q8N7H5	ZSCAN5C	PAF1	SCAN	0.41	1.34141	retained
A6NGD5	Q8WVC0	ZSCAN5C	LEO1	SCAN	0	1.0568	retained
A6NGD5	Q92598	ZSCAN5C	HSPH1	SCAN	0.01	0.913116	retained
A6NGD5	Q92769	ZSCAN5C	HDAC2	SCAN	0.02	1.3478	retained
A6NGD5	Q93008	ZSCAN5C	USP9X	SCAN	0.25	1.1581	frequent_flier
A6NGD5	Q93009	ZSCAN5C	USP7	SCAN	0	0.898741	retained
A6NGD5	Q96EY1	ZSCAN5C	DNAJA3	SCAN	0.36	1.11297	retained
A6NGD5	Q99627	ZSCAN5C	COPS8	SCAN	1	3.03991	retained
A6NGD5	Q9BQ39	ZSCAN5C	DDX50	SCAN	0	0.691247	retained
A6NGD5	Q9BQ67	ZSCAN5C	GRWD1	SCAN	0.36	1.27005	retained
A6NGD5	Q9BQA1	ZSCAN5C	WDR77	SCAN	1	2.60622	frequent_flier
A6NGD5	Q9BRP1	ZSCAN5C	PDCD2L	SCAN	0	0.890295	non_nuclear
A6NGD5	Q9BSD7	ZSCAN5C	NTPCR	SCAN	0.42	1.11151	non_nuclear
A6NGD5	Q9BSJ8	ZSCAN5C	ESYT1	SCAN	0	0.769113	non_nuclear
A6NGD5	Q9BTT6	ZSCAN5C	LRRC1	SCAN	0.5	2.1641	non_nuclear
A6NGD5	Q9BVP2	ZSCAN5C	GNL3	SCAN	0	0.613967	frequent_flier
A6NGD5	Q9BY77	ZSCAN5C	POLDIP3	SCAN	0	0.319355	frequent_flier
A6NGD5	Q9GZS3	ZSCAN5C	WDR61	SCAN	0.04	0.91901	retained
A6NGD5	Q9H6R4	ZSCAN5C	NOL6	SCAN	0.49	1.4965	frequent_flier
A6NGD5	Q9NP81	ZSCAN5C	SARS2	SCAN	1	3.14383	frequent_flier
A6NGD5	Q9NR30	ZSCAN5C	DDX21	SCAN	0	0.335187	frequent_flier
A6NGD5	Q9NVP1	ZSCAN5C	DDX18	SCAN	0	0.798595	retained
A6NGD5	Q9P2K3	ZSCAN5C	RCOR3	SCAN	0	1.2133	retained
A6NGD5	Q9UBW7	ZSCAN5C	ZMYM2	SCAN	1	34.9513	retained
A6NGD5	Q9UKL0	ZSCAN5C	RCOR1	SCAN	1	3.34953	retained
A6NGD5	Q9UL42	ZSCAN5C	PNMA2	SCAN	0.95	1.73142	retained
A6NGD5	Q9UNE7	ZSCAN5C	STUB1	SCAN	0.06	0.794633	frequent_flier
A6NGD5	Q9Y230	ZSCAN5C	RUVBL2	SCAN	0	0.291283	frequent_flier
A6NGD5	Q9Y265	ZSCAN5C	RUVBL1	SCAN	0	0.458663	frequent_flier
A6NGD5	Q9Y2S7	ZSCAN5C	Q9Y2S7	SCAN	0	0.890295	retained
A6NGD5	Q9Y4W2	ZSCAN5C	LAS1L	SCAN	0.09	0.804158	retained
A6NGD5	RM	ZSCAN5C	RM	SCAN	0	0.379422	non_nuclear
A6NK75	O43143	ZNF98	DHX15	KRAB	0.39	1.56036	frequent_flier
A6NK75	O60506	ZNF98	SYNCRIP	KRAB	0	0.464178	frequent_flier
A6NK75	O60832	ZNF98	DKC1	KRAB	0.97	3.11411	frequent_flier
A6NK75	O60884	ZNF98	DNAJA2	KRAB	0.6	1.68018	frequent_flier
A6NK75	P03244	ZNF98	P03244	KRAB	0.9	4.37719	frequent_flier
A6NK75	P04637	ZNF98	TP53	KRAB	0	0.513416	frequent_flier
A6NK75	P07199	ZNF98	CENPB	KRAB	1	2.62116	retained
A6NK75	P07305	ZNF98	H1F0	KRAB	0	1.06528	retained
A6NK75	P09874	ZNF98	PARP1	KRAB	0.68	1.71315	frequent_flier
A6NK75	P11177	ZNF98	PDHB	KRAB	0.05	0.76647	non_nuclear
A6NK75	P11277	ZNF98	SPTB	KRAB	0	1.23291	non_nuclear
A6NK75	P11388	ZNF98	TOP2A	KRAB	0.24	1.62736	frequent_flier
A6NK75	P12956	ZNF98	XRCC6	KRAB	0	0.477856	frequent_flier
A6NK75	P13010	ZNF98	XRCC5	KRAB	0	0.355968	frequent_flier
A6NK75	P15880	ZNF98	RPS2	KRAB	0	0.389918	frequent_flier
A6NK75	P17096	ZNF98	HMGA1	KRAB	0	0.657229	retained
A6NK75	P17480	ZNF98	UBTF	KRAB	0	1.10073	retained
A6NK75	P17812	ZNF98	CTPS1	KRAB	0	0.476621	frequent_flier
A6NK75	P18887	ZNF98	XRCC1	KRAB	0	1.44109	retained
A6NK75	P22087	ZNF98	FBL	KRAB	0.06	1.09676	frequent_flier
A6NK75	P27635	ZNF98	RPL10	KRAB	0	0.803278	frequent_flier
A6NK75	P31689	ZNF98	DNAJA1	KRAB	0.1	0.732536	frequent_flier
A6NK75	P35579	ZNF98	MYH9	KRAB	0	0.408172	frequent_flier
A6NK75	P35580	ZNF98	MYH10	KRAB	0.99	3.02054	frequent_flier
A6NK75	P36578	ZNF98	RPL4	KRAB	0	0.168648	frequent_flier
A6NK75	P46013	ZNF98	MKI67	KRAB	0.97	3.73975	frequent_flier
A6NK75	P49916	ZNF98	LIG3	KRAB	0	1.08244	retained
A6NK75	P50570	ZNF98	DNM2	KRAB	0.33	1.65531	non_nuclear
A6NK75	P57078	ZNF98	RIPK4	KRAB	1	3.50365	retained
A6NK75	P58107	ZNF98	P58107	KRAB	0	0.630153	frequent_flier
A6NK75	P63151	ZNF98	PPP2R2A	KRAB	0	0.389749	non_nuclear
A6NK75	P63167	ZNF98	DYNLL1	KRAB	0.02	0.93838	retained
A6NK75	P63244	ZNF98	GNB2L1	KRAB	0	0.329814	retained
A6NK75	Q02880	ZNF98	TOP2B	KRAB	0	0.903633	retained
A6NK75	Q07021	ZNF98	C1QBP	KRAB	0	0.381416	retained
A6NK75	Q07666	ZNF98	KHDRBS1	KRAB	0	0.737517	frequent_flier
A6NK75	Q13162	ZNF98	PRDX4	KRAB	0	0.368425	non_nuclear
A6NK75	Q13263	ZNF98	TRIM28	KRAB	0	1.18108	retained
A6NK75	Q13428	ZNF98	TCOF1	KRAB	0	0.745224	retained
A6NK75	Q14257	ZNF98	RCN2	KRAB	0	0.566598	frequent_flier
A6NK75	Q14566	ZNF98	MCM6	KRAB	0	0.414979	retained
A6NK75	Q14676	ZNF98	MDC1	KRAB	0.99	7.72454	frequent_flier
A6NK75	Q14684	ZNF98	RRP1B	KRAB	0	0.594229	retained
A6NK75	Q14690	ZNF98	PDCD11	KRAB	0.02	0.778672	frequent_flier
A6NK75	Q14978	ZNF98	NOLC1	KRAB	0.02	1.08775	frequent_flier
A6NK75	Q14980	ZNF98	NUMA1	KRAB	1	7.3925	frequent_flier
A6NK75	Q1ED39	ZNF98	KNOP1	KRAB	1	2.31255	retained
A6NK75	Q3ZCQ8	ZNF98	TIMM50	KRAB	1	3.7911	frequent_flier
A6NK75	Q49A26	ZNF98	GLYR1	KRAB	0.81	1.95643	retained
A6NK75	Q5SY16	ZNF98	NOL9	KRAB	0.48	1.61616	retained
A6NK75	Q7Z6Z7	ZNF98	HUWE1	KRAB	0.17	1.28455	retained
A6NK75	Q7Z7K6	ZNF98	CENPV	KRAB	1	4.64398	frequent_flier
A6NK75	Q86V81	ZNF98	ALYREF	KRAB	0	0.940204	frequent_flier
A6NK75	Q8N9M1	ZNF98	C19orf47	KRAB	0.91	1.97764	retained
A6NK75	Q8WYP5	ZNF98	AHCTF1	KRAB	0.48	1.65396	retained
A6NK75	Q92522	ZNF98	H1FX	KRAB	0.14	0.958679	retained
A6NK75	Q96B97	ZNF98	SH3KBP1	KRAB	0.28	1.44109	retained
A6NK75	Q9BQA1	ZNF98	WDR77	KRAB	0.04	1.02521	frequent_flier
A6NK75	Q9BVP2	ZNF98	GNL3	KRAB	0	0.417891	frequent_flier
A6NK75	Q9BY77	ZNF98	POLDIP3	KRAB	0	0.840618	frequent_flier
A6NK75	Q9H6R4	ZNF98	NOL6	KRAB	0.34	1.01832	frequent_flier
A6NK75	Q9NR30	ZNF98	DDX21	KRAB	0	0.914641	frequent_flier
A6NK75	Q9NVP1	ZNF98	DDX18	KRAB	0	0.737757	retained
A6NK75	Q9NY12	ZNF98	GAR1	KRAB	0.98	2.55556	retained
A6NK75	Q9ULW0	ZNF98	TPX2	KRAB	0	1.18389	retained
A6NK75	Q9UNE7	ZNF98	STUB1	KRAB	0	0.534646	frequent_flier
A6NK75	Q9Y265	ZNF98	RUVBL1	KRAB	0	0.229478	frequent_flier
A6NK75	Q9Y4W2	ZNF98	LAS1L	KRAB	0.33	1.38295	retained
A6NK75	Q9Y5J7	ZNF98	TIMM9	KRAB	0.46	1.45269	non_nuclear
A6NK75	RM	ZNF98	RM	KRAB	0	0.627789	non_nuclear
B2RXF5	O00154	ZBTB42	ACOT7	BTB	0	0.638602	non_nuclear
B2RXF5	O14744	ZBTB42	PRMT5	BTB	0.98	2.73598	frequent_flier
B2RXF5	O14867	ZBTB42	BACH1	BTB	1	4.23653	retained
B2RXF5	O43143	ZBTB42	DHX15	BTB	0	0.308439	frequent_flier
B2RXF5	O60341	ZBTB42	KDM1A	BTB	0.61	3.82038	retained
B2RXF5	O60506	ZBTB42	SYNCRIP	BTB	0	0.19765	frequent_flier
B2RXF5	O60884	ZBTB42	DNAJA2	BTB	0.01	0.999633	frequent_flier
B2RXF5	O75190	ZBTB42	DNAJB6	BTB	0.46	1.70106	retained
B2RXF5	O75340	ZBTB42	PDCD6	BTB	0.45	1.18458	non_nuclear
B2RXF5	O75362	ZBTB42	ZNF217	BTB	0.82	2.07884	retained
B2RXF5	O75489	ZBTB42	NDUFS3	BTB	0	0.78072	retained
B2RXF5	O75694	ZBTB42	NUP155	BTB	0.01	0.762667	retained
B2RXF5	P03244	ZBTB42	P03244	BTB	0.33	2.71533	frequent_flier
B2RXF5	P04637	ZBTB42	TP53	BTB	0	0.479869	frequent_flier
B2RXF5	P05204	ZBTB42	HMGN2	BTB	0	1.16793	retained
B2RXF5	P07305	ZBTB42	H1F0	BTB	0	1.01978	retained
B2RXF5	P08559	ZBTB42	PDHA1	BTB	0	0.682072	frequent_flier
B2RXF5	P09874	ZBTB42	PARP1	BTB	0	0.562705	frequent_flier
B2RXF5	P11177	ZBTB42	PDHB	BTB	0.02	0.660896	non_nuclear
B2RXF5	P11388	ZBTB42	TOP2A	BTB	0	0.75992	frequent_flier
B2RXF5	P12268	ZBTB42	IMPDH2	BTB	0	0.716942	frequent_flier
B2RXF5	P12956	ZBTB42	XRCC6	BTB	0	0.514681	frequent_flier
B2RXF5	P13010	ZBTB42	XRCC5	BTB	0	0.393356	frequent_flier
B2RXF5	P13489	ZBTB42	RNH1	BTB	0	0.609928	non_nuclear
B2RXF5	P13674	ZBTB42	P4HA1	BTB	0	1.34207	non_nuclear
B2RXF5	P14373	ZBTB42	TRIM27	BTB	0	1.15064	retained
B2RXF5	P15880	ZBTB42	RPS2	BTB	0	0.459885	frequent_flier
B2RXF5	P17029	ZBTB42	ZKSCAN1	BTB	0	1.15064	retained
B2RXF5	P17096	ZBTB42	HMGA1	BTB	0	0.641923	retained
B2RXF5	P17480	ZBTB42	UBTF	BTB	0.5	1.51256	retained
B2RXF5	P17812	ZBTB42	CTPS1	BTB	0	0.614535	frequent_flier
B2RXF5	P17980	ZBTB42	PSMC3	BTB	0.02	0.962679	retained
B2RXF5	P20674	ZBTB42	COX5A	BTB	0	0.807771	non_nuclear
B2RXF5	P22087	ZBTB42	FBL	BTB	0	0.207011	frequent_flier
B2RXF5	P27635	ZBTB42	RPL10	BTB	0.01	0.850057	frequent_flier
B2RXF5	P28482	ZBTB42	MAPK1	BTB	0.09	1.0977	retained
B2RXF5	P29590	ZBTB42	PML	BTB	0.67	2.62808	retained
B2RXF5	P30153	ZBTB42	PPP2R1A	BTB	0	0.216313	frequent_flier
B2RXF5	P31689	ZBTB42	DNAJA1	BTB	0.92	1.34389	frequent_flier
B2RXF5	P33993	ZBTB42	MCM7	BTB	0.01	1.01071	frequent_flier
B2RXF5	P35251	ZBTB42	RFC1	BTB	0	1.10693	retained
B2RXF5	P35579	ZBTB42	MYH9	BTB	0	0.237391	frequent_flier
B2RXF5	P35580	ZBTB42	MYH10	BTB	0	0.534035	frequent_flier
B2RXF5	P36578	ZBTB42	RPL4	BTB	0	0.973542	frequent_flier
B2RXF5	P46013	ZBTB42	MKI67	BTB	0.74	2.04328	frequent_flier
B2RXF5	P47756	ZBTB42	CAPZB	BTB	0	0.640048	non_nuclear
B2RXF5	P49366	ZBTB42	DHPS	BTB	0	1.1017	non_nuclear
B2RXF5	P49916	ZBTB42	LIG3	BTB	0.57	1.87629	retained
B2RXF5	P50570	ZBTB42	DNM2	BTB	0	0.956985	non_nuclear
B2RXF5	P51570	ZBTB42	GALK1	BTB	0.36	1.42631	non_nuclear
B2RXF5	P51784	ZBTB42	USP11	BTB	0.48	1.54777	retained
B2RXF5	P52739	ZBTB42	ZNF131	BTB	0	1.25603	retained
B2RXF5	P53621	ZBTB42	COPA	BTB	0	0.744585	non_nuclear
B2RXF5	P56545	ZBTB42	CTBP2	BTB	1	9.27869	retained
B2RXF5	P58107	ZBTB42	P58107	BTB	0.62	2.19736	frequent_flier
B2RXF5	P61962	ZBTB42	DCAF7	BTB	0.34	1.44535	retained
B2RXF5	P62195	ZBTB42	PSMC5	BTB	0.01	1.50571	retained
B2RXF5	P63151	ZBTB42	PPP2R2A	BTB	0	0.367859	non_nuclear
B2RXF5	P63167	ZBTB42	DYNLL1	BTB	0	0.497494	retained
B2RXF5	P63244	ZBTB42	GNB2L1	BTB	0	0.233948	retained
B2RXF5	Q06210	ZBTB42	GFPT1	BTB	0	0.937738	non_nuclear
B2RXF5	Q07021	ZBTB42	C1QBP	BTB	0	0.249602	retained
B2RXF5	Q07666	ZBTB42	KHDRBS1	BTB	0	0.424985	frequent_flier
B2RXF5	Q13162	ZBTB42	PRDX4	BTB	0	0.301808	non_nuclear
B2RXF5	Q13263	ZBTB42	TRIM28	BTB	0	0.806838	retained
B2RXF5	Q13363	ZBTB42	CTBP1	BTB	1	9.22146	retained
B2RXF5	Q13428	ZBTB42	TCOF1	BTB	0	0.46782	retained
B2RXF5	Q13501	ZBTB42	SQSTM1	BTB	0.45	1.66412	retained
B2RXF5	Q13547	ZBTB42	HDAC1	BTB	0	1.36629	retained
B2RXF5	Q13601	ZBTB42	KRR1	BTB	0	1.33573	retained
B2RXF5	Q13616	ZBTB42	CUL1	BTB	0.91	2.65648	retained
B2RXF5	Q14160	ZBTB42	SCRIB	BTB	0	0.953073	retained
B2RXF5	Q14257	ZBTB42	RCN2	BTB	0.09	1.11725	frequent_flier
B2RXF5	Q14566	ZBTB42	MCM6	BTB	0	0.498301	retained
B2RXF5	Q14676	ZBTB42	MDC1	BTB	0.77	2.90211	frequent_flier
B2RXF5	Q14684	ZBTB42	RRP1B	BTB	0	0.685748	retained
B2RXF5	Q14690	ZBTB42	PDCD11	BTB	0.02	0.718886	frequent_flier
B2RXF5	Q14978	ZBTB42	NOLC1	BTB	0	0.562632	frequent_flier
B2RXF5	Q14980	ZBTB42	NUMA1	BTB	0.12	1.29771	frequent_flier
B2RXF5	Q15154	ZBTB42	PCM1	BTB	0.41	1.45241	retained
B2RXF5	Q16718	ZBTB42	NDUFA5	BTB	0	1.11452	non_nuclear
B2RXF5	Q3KQU3	ZBTB42	MAP7D1	BTB	0.5	2.17118	retained
B2RXF5	Q3ZCQ8	ZBTB42	TIMM50	BTB	0	0.541273	frequent_flier
B2RXF5	Q49A26	ZBTB42	GLYR1	BTB	0.25	1.22567	retained
B2RXF5	Q53H96	ZBTB42	PYCRL	BTB	0.25	1.16027	non_nuclear
B2RXF5	Q5SY16	ZBTB42	NOL9	BTB	0.5	1.56975	retained
B2RXF5	Q6P2P2	ZBTB42	PRMT10	BTB	1	6.66392	non_nuclear
B2RXF5	Q7Z6Z7	ZBTB42	HUWE1	BTB	0.99	8.39512	retained
B2RXF5	Q7Z7K6	ZBTB42	CENPV	BTB	0.74	1.70737	frequent_flier
B2RXF5	Q86V81	ZBTB42	ALYREF	BTB	0	0.283902	frequent_flier
B2RXF5	Q86X55	ZBTB42	CARM1	BTB	0	0.933981	retained
B2RXF5	Q8IZL8	ZBTB42	PELP1	BTB	0	0.908503	retained
B2RXF5	Q8N163	ZBTB42	CCAR2	BTB	0.64	2.16105	retained
B2RXF5	Q8N7H5	ZBTB42	PAF1	BTB	0.48	1.45302	retained
B2RXF5	Q92522	ZBTB42	H1FX	BTB	0.28	1.26697	retained
B2RXF5	Q92598	ZBTB42	HSPH1	BTB	0	0.89893	retained
B2RXF5	Q92618	ZBTB42	ZNF516	BTB	1	10.4399	retained
B2RXF5	Q92769	ZBTB42	HDAC2	BTB	0	0.91925	retained
B2RXF5	Q93008	ZBTB42	USP9X	BTB	0.17	1.26719	frequent_flier
B2RXF5	Q96EY1	ZBTB42	DNAJA3	BTB	0.18	1.12369	retained
B2RXF5	Q96PV6	ZBTB42	LENG8	BTB	0	1.10693	retained
B2RXF5	Q96RE7	ZBTB42	NACC1	BTB	1	5.7917	retained
B2RXF5	Q96T88	ZBTB42	Q96T88	BTB	0.41	1.44041	retained
B2RXF5	Q99592	ZBTB42	ZBTB18	BTB	1	3.42739	retained
B2RXF5	Q9BQ39	ZBTB42	DDX50	BTB	0	0.969282	retained
B2RXF5	Q9BQ67	ZBTB42	GRWD1	BTB	0.07	0.881607	retained
B2RXF5	Q9BQA1	ZBTB42	WDR77	BTB	0.49	1.5987	frequent_flier
B2RXF5	Q9BRP1	ZBTB42	PDCD2L	BTB	0	0.977038	non_nuclear
B2RXF5	Q9BSD7	ZBTB42	NTPCR	BTB	0.92	2.19108	non_nuclear
B2RXF5	Q9BVP2	ZBTB42	GNL3	BTB	0	0.726616	frequent_flier
B2RXF5	Q9BY77	ZBTB42	POLDIP3	BTB	0	0.439393	frequent_flier
B2RXF5	Q9H2P0	ZBTB42	ADNP	BTB	0	1.10693	retained
B2RXF5	Q9H5H4	ZBTB42	ZNF768	BTB	0	1.16211	retained
B2RXF5	Q9H6F5	ZBTB42	CCDC86	BTB	0.09	1.56236	retained
B2RXF5	Q9H6R4	ZBTB42	NOL6	BTB	0	0.767863	frequent_flier
B2RXF5	Q9H6S0	ZBTB42	YTHDC2	BTB	0	1.21514	retained
B2RXF5	Q9HCC0	ZBTB42	MCCC2	BTB	0.01	1.07224	non_nuclear
B2RXF5	Q9NP81	ZBTB42	SARS2	BTB	0.25	1.32546	frequent_flier
B2RXF5	Q9NQ55	ZBTB42	PPAN-P2RY11;PPAN	BTB	0	1.07627	retained
B2RXF5	Q9NR30	ZBTB42	DDX21	BTB	0	0.383708	frequent_flier
B2RXF5	Q9NVP1	ZBTB42	DDX18	BTB	0	0.691101	retained
B2RXF5	Q9P2K3	ZBTB42	RCOR3	BTB	0	1.22953	retained
B2RXF5	Q9P2R7	ZBTB42	SUCLA2	BTB	0	0.901477	non_nuclear
B2RXF5	Q9UBW7	ZBTB42	ZMYM2	BTB	0	1.09652	retained
B2RXF5	Q9UKL0	ZBTB42	RCOR1	BTB	1	3.37229	retained
B2RXF5	Q9UL42	ZBTB42	PNMA2	BTB	0.45	1.23101	retained
B2RXF5	Q9UNE7	ZBTB42	STUB1	BTB	0	0.380619	frequent_flier
B2RXF5	Q9UNQ2	ZBTB42	DIMT1	BTB	0.41	1.28707	retained
B2RXF5	Q9Y230	ZBTB42	RUVBL2	BTB	0	0.477337	frequent_flier
B2RXF5	Q9Y265	ZBTB42	RUVBL1	BTB	0	0.425359	frequent_flier
B2RXF5	Q9Y2S7	ZBTB42	Q9Y2S7	BTB	0.82	1.59966	retained
B2RXF5	Q9Y4W2	ZBTB42	LAS1L	BTB	0.23	1.10133	retained
B2RXF5	Q9Y5Q8	ZBTB42	GTF3C5	BTB	0	1.15635	retained
B2RXF5	Q9Y5Y2	ZBTB42	NUBP2	BTB	0.5	1.73018	non_nuclear
B2RXF5	RM	ZBTB42	RM	BTB	0	0.425954	non_nuclear
O14771	O00154	ZNF213	ACOT7	KRAB;SCAN	0	0.771622	non_nuclear
O14771	O00178	ZNF213	GTPBP1	KRAB;SCAN	0	1.23136	non_nuclear
O14771	O00505	ZNF213	KPNA3	KRAB;SCAN	0.91	1.84853	retained
O14771	O00629	ZNF213	KPNA4	KRAB;SCAN	0.46	1.43631	retained
O14771	O14744	ZNF213	PRMT5	KRAB;SCAN	0	0.462668	frequent_flier
O14771	O43143	ZNF213	DHX15	KRAB;SCAN	0.6	1.38224	frequent_flier
O14771	O43663	ZNF213	PRC1	KRAB;SCAN	0.46	1.32012	retained
O14771	O60506	ZNF213	SYNCRIP	KRAB;SCAN	0	0.575228	frequent_flier
O14771	O60684	ZNF213	KPNA6	KRAB;SCAN	0.48	1.38162	non_nuclear
O14771	O60832	ZNF213	DKC1	KRAB;SCAN	0.07	1.02904	frequent_flier
O14771	O60884	ZNF213	DNAJA2	KRAB;SCAN	0	0.402008	frequent_flier
O14771	O95218	ZNF213	ZRANB2	KRAB;SCAN	0.91	1.8833	retained
O14771	P03244	ZNF213	P03244	KRAB;SCAN	1	7.2011	frequent_flier
O14771	P04637	ZNF213	TP53	KRAB;SCAN	0.02	0.555673	frequent_flier
O14771	P08559	ZNF213	PDHA1	KRAB;SCAN	0.01	0.795586	frequent_flier
O14771	P09874	ZNF213	PARP1	KRAB;SCAN	1	2.13895	frequent_flier
O14771	P11177	ZNF213	PDHB	KRAB;SCAN	0.1	0.782677	non_nuclear
O14771	P11388	ZNF213	TOP2A	KRAB;SCAN	0.96	3.09128	frequent_flier
O14771	P12268	ZNF213	IMPDH2	KRAB;SCAN	0	0.604295	frequent_flier
O14771	P12956	ZNF213	XRCC6	KRAB;SCAN	0	1.01163	frequent_flier
O14771	P13010	ZNF213	XRCC5	KRAB;SCAN	0.94	1.89056	frequent_flier
O14771	P13674	ZNF213	P4HA1	KRAB;SCAN	0	1.35017	non_nuclear
O14771	P15880	ZNF213	RPS2	KRAB;SCAN	0	0.654618	frequent_flier
O14771	P17028	ZNF213	ZNF24	KRAB;SCAN	0	1.1612	retained
O14771	P17096	ZNF213	HMGA1	KRAB;SCAN	0.12	1.61014	retained
O14771	P17480	ZNF213	UBTF	KRAB;SCAN	1	3.56943	retained
O14771	P17812	ZNF213	CTPS1	KRAB;SCAN	0.52	1.38593	frequent_flier
O14771	P22087	ZNF213	FBL	KRAB;SCAN	0.02	0.827696	frequent_flier
O14771	P27635	ZNF213	RPL10	KRAB;SCAN	0	0.436782	frequent_flier
O14771	P30153	ZNF213	PPP2R1A	KRAB;SCAN	0.63	1.47009	frequent_flier
O14771	P31689	ZNF213	DNAJA1	KRAB;SCAN	0.02	0.689136	frequent_flier
O14771	P33993	ZNF213	MCM7	KRAB;SCAN	0	0.657122	frequent_flier
O14771	P35251	ZNF213	RFC1	KRAB;SCAN	0.48	1.35017	retained
O14771	P35579	ZNF213	MYH9	KRAB;SCAN	0	0.676714	frequent_flier
O14771	P35580	ZNF213	MYH10	KRAB;SCAN	1	2.66927	frequent_flier
O14771	P36578	ZNF213	RPL4	KRAB;SCAN	0	1.01601	frequent_flier
O14771	P46013	ZNF213	MKI67	KRAB;SCAN	1	5.11946	frequent_flier
O14771	P47756	ZNF213	CAPZB	KRAB;SCAN	0.21	2.04154	non_nuclear
O14771	P49916	ZNF213	LIG3	KRAB;SCAN	0.95	3.33277	retained
O14771	P52907	ZNF213	CAPZA1	KRAB;SCAN	0.1	1.63974	non_nuclear
O14771	P53621	ZNF213	COPA	KRAB;SCAN	0	0.89671	non_nuclear
O14771	P57086	ZNF213	SCAND1	KRAB;SCAN	1	4.48296	retained
O14771	P58107	ZNF213	P58107	KRAB;SCAN	0	0.688606	frequent_flier
O14771	P63151	ZNF213	PPP2R2A	KRAB;SCAN	0.58	1.42501	non_nuclear
O14771	P63244	ZNF213	GNB2L1	KRAB;SCAN	0	0.567172	retained
O14771	P67775	ZNF213	PPP2CA	KRAB;SCAN	0.1	1.50669	retained
O14771	Q02241	ZNF213	KIF23	KRAB;SCAN	0	1.21219	retained
O14771	Q02880	ZNF213	TOP2B	KRAB;SCAN	1	9.88171	retained
O14771	Q05516	ZNF213	ZBTB16	KRAB;SCAN	0.91	2.07884	retained
O14771	Q07021	ZNF213	C1QBP	KRAB;SCAN	0	1.28915	retained
O14771	Q07666	ZNF213	KHDRBS1	KRAB;SCAN	0	0.506482	frequent_flier
O14771	Q13162	ZNF213	PRDX4	KRAB;SCAN	0	0.594978	non_nuclear
O14771	Q13263	ZNF213	TRIM28	KRAB;SCAN	0	0.690053	retained
O14771	Q13428	ZNF213	TCOF1	KRAB;SCAN	0	0.286054	retained
O14771	Q13547	ZNF213	HDAC1	KRAB;SCAN	0	1.0735	retained
O14771	Q13561	ZNF213	DCTN2	KRAB;SCAN	1	3.64512	non_nuclear
O14771	Q14257	ZNF213	RCN2	KRAB;SCAN	0.01	0.613142	frequent_flier
O14771	Q14566	ZNF213	MCM6	KRAB;SCAN	0	0.362003	retained
O14771	Q14676	ZNF213	MDC1	KRAB;SCAN	1	9.01315	frequent_flier
O14771	Q14684	ZNF213	RRP1B	KRAB;SCAN	0	0.616104	retained
O14771	Q14690	ZNF213	PDCD11	KRAB;SCAN	0.71	1.71925	frequent_flier
O14771	Q14978	ZNF213	NOLC1	KRAB;SCAN	0.08	1.03415	frequent_flier
O14771	Q14980	ZNF213	NUMA1	KRAB;SCAN	1	6.55689	frequent_flier
O14771	Q1ED39	ZNF213	KNOP1	KRAB;SCAN	0	1.0937	retained
O14771	Q3ZCQ8	ZNF213	TIMM50	KRAB;SCAN	0	0.717483	frequent_flier
O14771	Q49A26	ZNF213	GLYR1	KRAB;SCAN	0.69	1.6711	retained
O14771	Q7Z7K6	ZNF213	CENPV	KRAB;SCAN	1	3.73191	frequent_flier
O14771	Q86V81	ZNF213	ALYREF	KRAB;SCAN	0	0.903557	frequent_flier
O14771	Q8N7H5	ZNF213	PAF1	KRAB;SCAN	0.49	1.46653	retained
O14771	Q8NFW8	ZNF213	CMAS	KRAB;SCAN	0	1.11362	retained
O14771	Q8TBC5	ZNF213	ZSCAN18	KRAB;SCAN	0.98	2.31254	retained
O14771	Q8WYP5	ZNF213	AHCTF1	KRAB;SCAN	0.48	1.62369	retained
O14771	Q92522	ZNF213	H1FX	KRAB;SCAN	0.87	2.52822	retained
O14771	Q93008	ZNF213	USP9X	KRAB;SCAN	0.09	0.791964	frequent_flier
O14771	Q96EY1	ZNF213	DNAJA3	KRAB;SCAN	0.81	1.65562	retained
O14771	Q9BQ39	ZNF213	DDX50	KRAB;SCAN	0.66	3.40581	retained
O14771	Q9BQ67	ZNF213	GRWD1	KRAB;SCAN	0.13	0.899601	retained
O14771	Q9BQA1	ZNF213	WDR77	KRAB;SCAN	0	0.564031	frequent_flier
O14771	Q9BSJ8	ZNF213	ESYT1	KRAB;SCAN	1	19.2895	non_nuclear
O14771	Q9BVP2	ZNF213	GNL3	KRAB;SCAN	0	0.67458	frequent_flier
O14771	Q9BY77	ZNF213	POLDIP3	KRAB;SCAN	0	0.801375	frequent_flier
O14771	Q9H6F5	ZNF213	CCDC86	KRAB;SCAN	1	3.91659	retained
O14771	Q9H6R4	ZNF213	NOL6	KRAB;SCAN	1	3.60745	frequent_flier
O14771	Q9H6S0	ZNF213	YTHDC2	KRAB;SCAN	0.6	2.30231	retained
O14771	Q9H7D7	ZNF213	WDR26	KRAB;SCAN	0	0.903752	retained
O14771	Q9HCC0	ZNF213	MCCC2	KRAB;SCAN	1	8.51975	non_nuclear
O14771	Q9NR30	ZNF213	DDX21	KRAB;SCAN	1	1.26088	frequent_flier
O14771	Q9NVP1	ZNF213	DDX18	KRAB;SCAN	0	1.08442	retained
O14771	Q9NY12	ZNF213	GAR1	KRAB;SCAN	0.28	1.08769	retained
O14771	Q9ULW0	ZNF213	TPX2	KRAB;SCAN	0	1.16674	retained
O14771	Q9UMX1	ZNF213	SUFU	KRAB;SCAN	1	4.12934	retained
O14771	Q9UNE7	ZNF213	STUB1	KRAB;SCAN	0	0.463641	frequent_flier
O14771	Q9Y230	ZNF213	RUVBL2	KRAB;SCAN	0	0.327255	frequent_flier
O14771	Q9Y265	ZNF213	RUVBL1	KRAB;SCAN	0	0.484419	frequent_flier
O14771	Q9Y2R4	ZNF213	DDX52	KRAB;SCAN	0	1.21219	retained
O14771	RM	ZNF213	RM	KRAB;SCAN	0	0.534666	non_nuclear
O14978	O60506	ZNF263	SYNCRIP	KRAB;SCAN	0	0.275669	frequent_flier
O14978	O60884	ZNF263	DNAJA2	KRAB;SCAN	0	0.419717	frequent_flier
O14978	P03244	ZNF263	P03244	KRAB;SCAN	0.99	5.37591	frequent_flier
O14978	P07305	ZNF263	H1F0	KRAB;SCAN	0.49	1.54996	retained
O14978	P09874	ZNF263	PARP1	KRAB;SCAN	0	1.08339	frequent_flier
O14978	P11388	ZNF263	TOP2A	KRAB;SCAN	0.05	1.38902	frequent_flier
O14978	P12956	ZNF263	XRCC6	KRAB;SCAN	0	1.28228	frequent_flier
O14978	P13010	ZNF263	XRCC5	KRAB;SCAN	0	1.07567	frequent_flier
O14978	P15880	ZNF263	RPS2	KRAB;SCAN	0	0.702571	frequent_flier
O14978	P17028	ZNF263	ZNF24	KRAB;SCAN	0.48	1.69571	retained
O14978	P17096	ZNF263	HMGA1	KRAB;SCAN	0	0.609133	retained
O14978	P22087	ZNF263	FBL	KRAB;SCAN	0	0.459848	frequent_flier
O14978	P27635	ZNF263	RPL10	KRAB;SCAN	0	0.521891	frequent_flier
O14978	P30153	ZNF263	PPP2R1A	KRAB;SCAN	0	0.568967	frequent_flier
O14978	P35579	ZNF263	MYH9	KRAB;SCAN	0	0.129598	frequent_flier
O14978	P35580	ZNF263	MYH10	KRAB;SCAN	0	0.133365	frequent_flier
O14978	P46013	ZNF263	MKI67	KRAB;SCAN	0.49	2.33322	frequent_flier
O14978	P57086	ZNF263	SCAND1	KRAB;SCAN	1	5.5644	retained
O14978	P63151	ZNF263	PPP2R2A	KRAB;SCAN	0	0.950506	non_nuclear
O14978	P63167	ZNF263	DYNLL1	KRAB;SCAN	0	0.616655	retained
O14978	P63244	ZNF263	GNB2L1	KRAB;SCAN	0	0.194531	retained
O14978	Q02880	ZNF263	TOP2B	KRAB;SCAN	0	0.938434	retained
O14978	Q07021	ZNF263	C1QBP	KRAB;SCAN	0	0.328814	retained
O14978	Q07666	ZNF263	KHDRBS1	KRAB;SCAN	0	0.645182	frequent_flier
O14978	Q13162	ZNF263	PRDX4	KRAB;SCAN	0	0.594051	non_nuclear
O14978	Q13263	ZNF263	TRIM28	KRAB;SCAN	0	1.24788	retained
O14978	Q14676	ZNF263	MDC1	KRAB;SCAN	0.52	1.81884	frequent_flier
O14978	Q14690	ZNF263	PDCD11	KRAB;SCAN	0	0.503308	frequent_flier
O14978	Q14978	ZNF263	NOLC1	KRAB;SCAN	0.01	1.06506	frequent_flier
O14978	Q14980	ZNF263	NUMA1	KRAB;SCAN	0.32	1.42601	frequent_flier
O14978	Q3ZCQ8	ZNF263	TIMM50	KRAB;SCAN	0.46	1.55743	frequent_flier
O14978	Q49A26	ZNF263	GLYR1	KRAB;SCAN	0	1.31054	retained
O14978	Q7Z7K6	ZNF263	CENPV	KRAB;SCAN	0.1	0.961825	frequent_flier
O14978	Q86V81	ZNF263	ALYREF	KRAB;SCAN	0	0.179956	frequent_flier
O14978	Q8TBC5	ZNF263	ZSCAN18	KRAB;SCAN	1	2.85613	retained
O14978	Q92522	ZNF263	H1FX	KRAB;SCAN	0.86	2.63378	retained
O14978	Q93008	ZNF263	USP9X	KRAB;SCAN	0.05	1.08575	frequent_flier
O14978	Q96JC1	ZNF263	VPS39	KRAB;SCAN	1	4.23653	non_nuclear
O14978	Q9BQA1	ZNF263	WDR77	KRAB;SCAN	0	0.669845	frequent_flier
O14978	Q9BY77	ZNF263	POLDIP3	KRAB;SCAN	0	0.362586	frequent_flier
O14978	Q9H6F5	ZNF263	CCDC86	KRAB;SCAN	0.33	1.63314	retained
O14978	Q9NR30	ZNF263	DDX21	KRAB;SCAN	0	0.406136	frequent_flier
O14978	Q9Y265	ZNF263	RUVBL1	KRAB;SCAN	0	0.256508	frequent_flier
O14978	RM	ZNF263	RM	KRAB;SCAN	0	0.640133	non_nuclear
O43296	O00629	ZNF264	KPNA4	KRAB	0	0.970548	retained
O43296	O43143	ZNF264	DHX15	KRAB	0	0.133983	frequent_flier
O43296	O60313	ZNF264	OPA1	KRAB	0.49	2.27832	non_nuclear
O43296	O60506	ZNF264	SYNCRIP	KRAB	0	0.440546	frequent_flier
O43296	O60832	ZNF264	DKC1	KRAB	0.47	1.14479	frequent_flier
O43296	O60884	ZNF264	DNAJA2	KRAB	0	0.414955	frequent_flier
O43296	O75190	ZNF264	DNAJB6	KRAB	0.17	0.955973	retained
O43296	O75489	ZNF264	NDUFS3	KRAB	0	0.742975	retained
O43296	O95218	ZNF264	ZRANB2	KRAB	0.95	2.09077	retained
O43296	P02545	ZNF264	LMNA	KRAB	0	0.57658	retained
O43296	P03244	ZNF264	P03244	KRAB	1	5.78027	frequent_flier
O43296	P04637	ZNF264	TP53	KRAB	0	0.384412	frequent_flier
O43296	P07858	ZNF264	CTSB	KRAB	0.28	1.19191	retained
O43296	P08559	ZNF264	PDHA1	KRAB	0.43	1.19555	frequent_flier
O43296	P09874	ZNF264	PARP1	KRAB	0.49	0.950602	frequent_flier
O43296	P11177	ZNF264	PDHB	KRAB	0.51	1.15534	non_nuclear
O43296	P11388	ZNF264	TOP2A	KRAB	0.05	0.775876	frequent_flier
O43296	P12956	ZNF264	XRCC6	KRAB	0.01	0.696662	frequent_flier
O43296	P13010	ZNF264	XRCC5	KRAB	0	0.542811	frequent_flier
O43296	P13489	ZNF264	RNH1	KRAB	0	0.477266	non_nuclear
O43296	P15880	ZNF264	RPS2	KRAB	0.02	0.615995	frequent_flier
O43296	P17096	ZNF264	HMGA1	KRAB	0	0.435635	retained
O43296	P17480	ZNF264	UBTF	KRAB	1	6.11576	retained
O43296	P17812	ZNF264	CTPS1	KRAB	1	2.08843	frequent_flier
O43296	P22087	ZNF264	FBL	KRAB	0.11	0.793298	frequent_flier
O43296	P27635	ZNF264	RPL10	KRAB	0.58	1.18621	frequent_flier
O43296	P30153	ZNF264	PPP2R1A	KRAB	0	0.136018	frequent_flier
O43296	P31689	ZNF264	DNAJA1	KRAB	0.1	0.652373	frequent_flier
O43296	P33993	ZNF264	MCM7	KRAB	1	2.3804	frequent_flier
O43296	P35251	ZNF264	RFC1	KRAB	0.48	1.31975	retained
O43296	P35579	ZNF264	MYH9	KRAB	0	0.466242	frequent_flier
O43296	P35580	ZNF264	MYH10	KRAB	0	0.761017	frequent_flier
O43296	P36578	ZNF264	RPL4	KRAB	0	1.05182	frequent_flier
O43296	P38432	ZNF264	COIL	KRAB	0.5	1.9246	retained
O43296	P46013	ZNF264	MKI67	KRAB	0.48	1.48376	frequent_flier
O43296	P49916	ZNF264	LIG3	KRAB	0.49	2.1284	retained
O43296	P51570	ZNF264	GALK1	KRAB	0	0.836522	non_nuclear
O43296	P53621	ZNF264	COPA	KRAB	0	0.57497	non_nuclear
O43296	P61962	ZNF264	DCAF7	KRAB	0	0.661804	retained
O43296	P63151	ZNF264	PPP2R2A	KRAB	0.01	0.762351	non_nuclear
O43296	P63167	ZNF264	DYNLL1	KRAB	0.02	0.75403	retained
O43296	P63244	ZNF264	GNB2L1	KRAB	0	0.531535	retained
O43296	Q02880	ZNF264	TOP2B	KRAB	0	0.97084	retained
O43296	Q06210	ZNF264	GFPT1	KRAB	0.17	1.09903	non_nuclear
O43296	Q07021	ZNF264	C1QBP	KRAB	0	0.368192	retained
O43296	Q13263	ZNF264	TRIM28	KRAB	1	3.37938	retained
O43296	Q13363	ZNF264	CTBP1	KRAB	0.46	1.26621	retained
O43296	Q13428	ZNF264	TCOF1	KRAB	0.68	1.72648	retained
O43296	Q14257	ZNF264	RCN2	KRAB	0.25	1.13018	frequent_flier
O43296	Q14676	ZNF264	MDC1	KRAB	0.44	1.6078	frequent_flier
O43296	Q14684	ZNF264	RRP1B	KRAB	0	0.630051	retained
O43296	Q14690	ZNF264	PDCD11	KRAB	0.46	1.3871	frequent_flier
O43296	Q14978	ZNF264	NOLC1	KRAB	0.46	0.656491	frequent_flier
O43296	Q14980	ZNF264	NUMA1	KRAB	0.32	1.20983	frequent_flier
O43296	Q16718	ZNF264	NDUFA5	KRAB	0.96	1.45217	non_nuclear
O43296	Q3ZCQ8	ZNF264	TIMM50	KRAB	1	2.46823	frequent_flier
O43296	Q49A26	ZNF264	GLYR1	KRAB	0	0.984465	retained
O43296	Q53H96	ZNF264	PYCRL	KRAB	0.35	1.12376	non_nuclear
O43296	Q7Z7K6	ZNF264	CENPV	KRAB	0.46	1.16948	frequent_flier
O43296	Q86V81	ZNF264	ALYREF	KRAB	0	0.193471	frequent_flier
O43296	Q8IZL8	ZNF264	PELP1	KRAB	0	0.875643	retained
O43296	Q8N7H5	ZNF264	PAF1	KRAB	0.46	1.2051	retained
O43296	Q92504	ZNF264	SLC39A7	KRAB	0.81	1.88398	non_nuclear
O43296	Q96EY1	ZNF264	DNAJA3	KRAB	0	0.751103	retained
O43296	Q96RT1	ZNF264	ERBB2IP	KRAB	0.46	1.75503	retained
O43296	Q96T88	ZNF264	Q96T88	KRAB	0	0.984465	retained
O43296	Q9BSD7	ZNF264	NTPCR	KRAB	0.5	1.74626	non_nuclear
O43296	Q9BTT6	ZNF264	LRRC1	KRAB	0.96	2.95715	non_nuclear
O43296	Q9BVP2	ZNF264	GNL3	KRAB	0.99	1.82512	frequent_flier
O43296	Q9BY77	ZNF264	POLDIP3	KRAB	0	0.366523	frequent_flier
O43296	Q9GZS3	ZNF264	WDR61	KRAB	0	0.717106	retained
O43296	Q9H6R4	ZNF264	NOL6	KRAB	1	5.38058	frequent_flier
O43296	Q9NP81	ZNF264	SARS2	KRAB	0.35	1.08944	frequent_flier
O43296	Q9NR30	ZNF264	DDX21	KRAB	0	0.431552	frequent_flier
O43296	Q9NVP1	ZNF264	DDX18	KRAB	0	0.370374	retained
O43296	Q9NY12	ZNF264	GAR1	KRAB	0.28	1.03096	retained
O43296	Q9P2R7	ZNF264	SUCLA2	KRAB	0.96	2.89704	non_nuclear
O43296	Q9UL42	ZNF264	PNMA2	KRAB	1	2.67018	retained
O43296	Q9ULW0	ZNF264	TPX2	KRAB	0	1.14927	retained
O43296	Q9UNQ2	ZNF264	DIMT1	KRAB	1	3.68779	retained
O43296	Q9Y2R4	ZNF264	DDX52	KRAB	0.5	1.98267	retained
O43296	Q9Y4W2	ZNF264	LAS1L	KRAB	0.61	1.51568	retained
O43296	RM	ZNF264	RM	KRAB	0	0.383585	non_nuclear
O43829	O00154	ZBTB14	ACOT7	BTB	0.05	1.34795	non_nuclear
O43829	O00178	ZBTB14	GTPBP1	BTB	0	1.23141	non_nuclear
O43829	O14744	ZBTB14	PRMT5	BTB	0.01	0.758224	frequent_flier
O43829	O43143	ZBTB14	DHX15	BTB	0	0.819913	frequent_flier
O43829	O60506	ZBTB14	SYNCRIP	BTB	0	0.914665	frequent_flier
O43829	O95218	ZBTB14	ZRANB2	BTB	0	1.15044	retained
O43829	P02545	ZBTB14	LMNA	BTB	0	0.631438	retained
O43829	P03244	ZBTB14	P03244	BTB	0.97	5.51036	frequent_flier
O43829	P07305	ZBTB14	H1F0	BTB	0.5	1.90433	retained
O43829	P08559	ZBTB14	PDHA1	BTB	0.02	0.796369	frequent_flier
O43829	P09132	ZBTB14	SRP19	BTB	1	3.39769	retained
O43829	P09874	ZBTB14	PARP1	BTB	0	0.906472	frequent_flier
O43829	P11177	ZBTB14	PDHB	BTB	0.05	0.783404	non_nuclear
O43829	P11388	ZBTB14	TOP2A	BTB	0	0.172021	frequent_flier
O43829	P12268	ZBTB14	IMPDH2	BTB	0	0.882862	frequent_flier
O43829	P12270	ZBTB14	TPR	BTB	0	1.15145	retained
O43829	P12956	ZBTB14	XRCC6	BTB	0	0.41618	frequent_flier
O43829	P13010	ZBTB14	XRCC5	BTB	0	0.467141	frequent_flier
O43829	P13489	ZBTB14	RNH1	BTB	0	0.911868	non_nuclear
O43829	P13807	ZBTB14	GYS1	BTB	0	1.07946	retained
O43829	P15880	ZBTB14	RPS2	BTB	0	0.464301	frequent_flier
O43829	P17096	ZBTB14	HMGA1	BTB	0	0.491749	retained
O43829	P17655	ZBTB14	CAPN2	BTB	0.36	1.7596	non_nuclear
O43829	P17812	ZBTB14	CTPS1	BTB	0.69	1.62118	frequent_flier
O43829	P22087	ZBTB14	FBL	BTB	0.46	1.11893	frequent_flier
O43829	P28482	ZBTB14	MAPK1	BTB	0.96	2.4534	retained
O43829	P30153	ZBTB14	PPP2R1A	BTB	0	0.427976	frequent_flier
O43829	P35579	ZBTB14	MYH9	BTB	0	0.27126	frequent_flier
O43829	P35580	ZBTB14	MYH10	BTB	0	0.642715	frequent_flier
O43829	P46013	ZBTB14	MKI67	BTB	0.03	0.839179	frequent_flier
O43829	P47756	ZBTB14	CAPZB	BTB	0	0.889384	non_nuclear
O43829	P51570	ZBTB14	GALK1	BTB	0	1.07244	non_nuclear
O43829	P52907	ZBTB14	CAPZA1	BTB	0	1.12447	non_nuclear
O43829	P57078	ZBTB14	RIPK4	BTB	0	1.09392	retained
O43829	P61962	ZBTB14	DCAF7	BTB	0	0.71639	retained
O43829	P63151	ZBTB14	PPP2R2A	BTB	0	0.830354	non_nuclear
O43829	P63167	ZBTB14	DYNLL1	BTB	0	0.730267	retained
O43829	P63244	ZBTB14	GNB2L1	BTB	0	0.567971	retained
O43829	Q07021	ZBTB14	C1QBP	BTB	0	0.528285	retained
O43829	Q07666	ZBTB14	KHDRBS1	BTB	0	0.507052	frequent_flier
O43829	Q13162	ZBTB14	PRDX4	BTB	0	1.29888	non_nuclear
O43829	Q13263	ZBTB14	TRIM28	BTB	0	0.782252	retained
O43829	Q13428	ZBTB14	TCOF1	BTB	0	0.838362	retained
O43829	Q13554	ZBTB14	CAMK2B	BTB	0	1.22525	retained
O43829	Q13555	ZBTB14	CAMK2G	BTB	0.45	1.51585	retained
O43829	Q14676	ZBTB14	MDC1	BTB	0.06	0.930663	frequent_flier
O43829	Q14978	ZBTB14	NOLC1	BTB	0.03	0.767	frequent_flier
O43829	Q14980	ZBTB14	NUMA1	BTB	0	0.710611	frequent_flier
O43829	Q15072	ZBTB14	ZNF146	BTB	0	1.12404	retained
O43829	Q3ZCQ8	ZBTB14	TIMM50	BTB	0	0.411189	frequent_flier
O43829	Q70CQ2	ZBTB14	USP34	BTB	0	1.10878	non_nuclear
O43829	Q7L775	ZBTB14	EPM2AIP1	BTB	0	1.21311	non_nuclear
O43829	Q7Z7K6	ZBTB14	CENPV	BTB	0.02	0.959052	frequent_flier
O43829	Q86X55	ZBTB14	CARM1	BTB	0	0.946045	retained
O43829	Q92522	ZBTB14	H1FX	BTB	0.35	1.41608	retained
O43829	Q92598	ZBTB14	HSPH1	BTB	0	0.564498	retained
O43829	Q96EY1	ZBTB14	DNAJA3	BTB	0	0.803322	retained
O43829	Q9BQ67	ZBTB14	GRWD1	BTB	0	0.742448	retained
O43829	Q9BQA1	ZBTB14	WDR77	BTB	0.01	0.684408	frequent_flier
O43829	Q9BRP1	ZBTB14	PDCD2L	BTB	0	0.988022	non_nuclear
O43829	Q9BVP2	ZBTB14	GNL3	BTB	0.2	1.29571	frequent_flier
O43829	Q9BY77	ZBTB14	POLDIP3	BTB	0	0.677576	frequent_flier
O43829	Q9NP81	ZBTB14	SARS2	BTB	0	0.942405	frequent_flier
O43829	Q9NR30	ZBTB14	DDX21	BTB	0	0.250851	frequent_flier
O43829	Q9NVP1	ZBTB14	DDX18	BTB	0	0.421291	retained
O43829	Q9NY12	ZBTB14	GAR1	BTB	0.18	1.08816	retained
O43829	Q9P2R7	ZBTB14	SUCLA2	BTB	0.4	1.69109	non_nuclear
O43829	Q9UGI8	ZBTB14	TES	BTB	1	4.24752	retained
O43829	Q9UNE7	ZBTB14	STUB1	BTB	0	0.32576	frequent_flier
O43829	Q9UNQ2	ZBTB14	DIMT1	BTB	0.41	1.29732	retained
O43829	Q9Y230	ZBTB14	RUVBL2	BTB	0	0.540223	frequent_flier
O43829	Q9Y265	ZBTB14	RUVBL1	BTB	0	0.360745	frequent_flier
O43829	RM	ZBTB14	RM	BTB	0	0.535327	non_nuclear
O60765	O14744	ZNF354A	PRMT5	KRAB	0	0.812214	frequent_flier
O60765	O43143	ZNF354A	DHX15	KRAB	0	1.11862	frequent_flier
O60765	O60506	ZNF354A	SYNCRIP	KRAB	0	1.36083	frequent_flier
O60765	P03244	ZNF354A	P03244	KRAB	0.33	4.2308	frequent_flier
O60765	P09874	ZNF354A	PARP1	KRAB	0	0.389127	frequent_flier
O60765	P12270	ZNF354A	TPR	KRAB	0	1.14495	retained
O60765	P12956	ZNF354A	XRCC6	KRAB	0	0.224914	frequent_flier
O60765	P15880	ZNF354A	RPS2	KRAB	0	0.744044	frequent_flier
O60765	P17096	ZNF354A	HMGA1	KRAB	0	1.07113	retained
O60765	P17812	ZNF354A	CTPS1	KRAB	0	0.499107	frequent_flier
O60765	P22087	ZNF354A	FBL	KRAB	0	0.853883	frequent_flier
O60765	P27635	ZNF354A	RPL10	KRAB	0	0.835133	frequent_flier
O60765	P30153	ZNF354A	PPP2R1A	KRAB	0	0.471276	frequent_flier
O60765	P35579	ZNF354A	MYH9	KRAB	0	0.317854	frequent_flier
O60765	P35580	ZNF354A	MYH10	KRAB	0	0.930274	frequent_flier
O60765	P50570	ZNF354A	DNM2	KRAB	0.89	2.8691	non_nuclear
O60765	P57078	ZNF354A	RIPK4	KRAB	0.69	1.97614	retained
O60765	P63151	ZNF354A	PPP2R2A	KRAB	0	0.854911	non_nuclear
O60765	P63167	ZNF354A	DYNLL1	KRAB	0.02	1.40674	retained
O60765	P63244	ZNF354A	GNB2L1	KRAB	0	0.436186	retained
O60765	Q07021	ZNF354A	C1QBP	KRAB	0	0.652669	retained
O60765	Q07666	ZNF354A	KHDRBS1	KRAB	0	0.634067	frequent_flier
O60765	Q13263	ZNF354A	TRIM28	KRAB	1	39.1048	retained
O60765	Q13428	ZNF354A	TCOF1	KRAB	0	1.30759	retained
O60765	Q14566	ZNF354A	MCM6	KRAB	0	0.850649	retained
O60765	Q14978	ZNF354A	NOLC1	KRAB	0	0.952028	frequent_flier
O60765	Q3ZCQ8	ZNF354A	TIMM50	KRAB	0.95	3.81584	frequent_flier
O60765	Q7Z7K6	ZNF354A	CENPV	KRAB	0.01	1.42298	frequent_flier
O60765	Q86V81	ZNF354A	ALYREF	KRAB	0	0.593963	frequent_flier
O60765	Q93008	ZNF354A	USP9X	KRAB	0.02	1.36343	frequent_flier
O60765	Q9BVP2	ZNF354A	GNL3	KRAB	0	0.854607	frequent_flier
O60765	Q9BY77	ZNF354A	POLDIP3	KRAB	0	0.521211	frequent_flier
O60765	Q9NR30	ZNF354A	DDX21	KRAB	0	0.755656	frequent_flier
O60765	Q9Y230	ZNF354A	RUVBL2	KRAB	0	0.465374	frequent_flier
O60765	Q9Y5J7	ZNF354A	TIMM9	KRAB	0.5	2.55822	non_nuclear
O60765	RM	ZNF354A	RM	KRAB	0	1.43066	non_nuclear
O75467	O60884	ZNF324	DNAJA2	KRAB	0	0.968089	frequent_flier
O75467	O75694	ZNF324	NUP155	KRAB	0	1.14708	retained
O75467	P03244	ZNF324	P03244	KRAB	0.01	3.67551	frequent_flier
O75467	P12268	ZNF324	IMPDH2	KRAB	0	1.16813	frequent_flier
O75467	P15880	ZNF324	RPS2	KRAB	0	1.00676	frequent_flier
O75467	P17812	ZNF324	CTPS1	KRAB	0	1.00846	frequent_flier
O75467	P22087	ZNF324	FBL	KRAB	0	1.5935	frequent_flier
O75467	P31689	ZNF324	DNAJA1	KRAB	0	1.29737	frequent_flier
O75467	P35580	ZNF324	MYH10	KRAB	0	1.24974	frequent_flier
O75467	P52907	ZNF324	CAPZA1	KRAB	0	1.13362	non_nuclear
O75467	P57078	ZNF324	RIPK4	KRAB	0	1.2476	retained
O75467	P63167	ZNF324	DYNLL1	KRAB	0	1.32375	retained
O75467	P63244	ZNF324	GNB2L1	KRAB	0	0.990107	retained
O75467	Q02241	ZNF324	KIF23	KRAB	0	1.23306	retained
O75467	Q07021	ZNF324	C1QBP	KRAB	0	0.738491	retained
O75467	Q13263	ZNF324	TRIM28	KRAB	1	72.0353	retained
O75467	Q14980	ZNF324	NUMA1	KRAB	0	1.125	frequent_flier
O75467	Q3ZCQ8	ZNF324	TIMM50	KRAB	0	1.24909	frequent_flier
O75467	Q9BQA1	ZNF324	WDR77	KRAB	0	1.11596	frequent_flier
O75467	Q9BVP2	ZNF324	GNL3	KRAB	0	1.20904	frequent_flier
O75467	Q9BY77	ZNF324	POLDIP3	KRAB	0	0.98181	frequent_flier
O75467	Q9NR30	ZNF324	DDX21	KRAB	0	0.523113	frequent_flier
O75467	Q9Y230	ZNF324	RUVBL2	KRAB	0	0.798863	frequent_flier
O75467	RM	ZNF324	RM	KRAB	1	9.05454	non_nuclear
O75626	O00411	PRDM1	POLRMT	SET	0	1.1998	non_nuclear
O75626	O14744	PRDM1	PRMT5	SET	0.22	1.33425	frequent_flier
O75626	O43143	PRDM1	DHX15	SET	0.72	1.29952	frequent_flier
O75626	O43663	PRDM1	PRC1	SET	1	3.73291	retained
O75626	O60506	PRDM1	SYNCRIP	SET	0	0.143988	frequent_flier
O75626	O60832	PRDM1	DKC1	SET	0.68	1.63004	frequent_flier
O75626	O60884	PRDM1	DNAJA2	SET	0	0.399522	frequent_flier
O75626	O75340	PRDM1	PDCD6	SET	0.45	1.33411	non_nuclear
O75626	O75489	PRDM1	NDUFS3	SET	0	0.72784	retained
O75626	O75694	PRDM1	NUP155	SET	0.85	4.3566	retained
O75626	P02545	PRDM1	LMNA	SET	0	0.561223	retained
O75626	P03244	PRDM1	P03244	SET	0.97	4.02391	frequent_flier
O75626	P04637	PRDM1	TP53	SET	0	0.369323	frequent_flier
O75626	P05204	PRDM1	HMGN2	SET	0	1.15054	retained
O75626	P07305	PRDM1	H1F0	SET	0.48	1.60985	retained
O75626	P08559	PRDM1	PDHA1	SET	0.02	0.683879	frequent_flier
O75626	P09874	PRDM1	PARP1	SET	1	1.28129	frequent_flier
O75626	P11177	PRDM1	PDHB	SET	0.07	0.590225	non_nuclear
O75626	P11388	PRDM1	TOP2A	SET	0.03	0.953463	frequent_flier
O75626	P12268	PRDM1	IMPDH2	SET	0	0.803814	frequent_flier
O75626	P12270	PRDM1	TPR	SET	0	0.893659	retained
O75626	P12956	PRDM1	XRCC6	SET	0.01	0.878779	frequent_flier
O75626	P13010	PRDM1	XRCC5	SET	0.17	1.13632	frequent_flier
O75626	P13489	PRDM1	RNH1	SET	0.36	1.43119	non_nuclear
O75626	P15880	PRDM1	RPS2	SET	0	0.418914	frequent_flier
O75626	P17096	PRDM1	HMGA1	SET	0.05	1.08361	retained
O75626	P17480	PRDM1	UBTF	SET	0	1.02972	retained
O75626	P17812	PRDM1	CTPS1	SET	0.19	0.918391	frequent_flier
O75626	P18887	PRDM1	XRCC1	SET	0	1.15054	retained
O75626	P22087	PRDM1	FBL	SET	0.06	0.785588	frequent_flier
O75626	P27635	PRDM1	RPL10	SET	0	0.394798	frequent_flier
O75626	P28482	PRDM1	MAPK1	SET	0.32	1.32658	retained
O75626	P30153	PRDM1	PPP2R1A	SET	0.99	1.56826	frequent_flier
O75626	P31689	PRDM1	DNAJA1	SET	0.02	0.62693	frequent_flier
O75626	P33993	PRDM1	MCM7	SET	0.04	0.925164	frequent_flier
O75626	P35579	PRDM1	MYH9	SET	0	0.295739	frequent_flier
O75626	P35580	PRDM1	MYH10	SET	0	0.829118	frequent_flier
O75626	P36578	PRDM1	RPL4	SET	0	0.388264	frequent_flier
O75626	P46013	PRDM1	MKI67	SET	0.92	2.48569	frequent_flier
O75626	P47756	PRDM1	CAPZB	SET	0	0.475502	non_nuclear
O75626	P49366	PRDM1	DHPS	SET	0.82	1.75984	non_nuclear
O75626	P49916	PRDM1	LIG3	SET	0.87	2.91055	retained
O75626	P52294	PRDM1	KPNA1	SET	1	9.01101	retained
O75626	P52907	PRDM1	CAPZA1	SET	0	0.652433	non_nuclear
O75626	P56545	PRDM1	CTBP2	SET	0.35	1.73189	retained
O75626	P58107	PRDM1	P58107	SET	0.5	1.77357	frequent_flier
O75626	P61962	PRDM1	DCAF7	SET	1	8.19697	retained
O75626	P62993	PRDM1	GRB2	SET	0	1.10515	retained
O75626	P63151	PRDM1	PPP2R2A	SET	1	2.05351	non_nuclear
O75626	P63167	PRDM1	DYNLL1	SET	0	0.541089	retained
O75626	P63244	PRDM1	GNB2L1	SET	0	0.412257	retained
O75626	P67775	PRDM1	PPP2CA	SET	0.48	1.79629	retained
O75626	Q02241	PRDM1	KIF23	SET	0.5	1.55527	retained
O75626	Q02880	PRDM1	TOP2B	SET	0	0.786191	retained
O75626	Q04724	PRDM1	TLE1	SET	0	1.26154	retained
O75626	Q07021	PRDM1	C1QBP	SET	0	0.568414	retained
O75626	Q07666	PRDM1	KHDRBS1	SET	0	0.482115	frequent_flier
O75626	Q09472	PRDM1	EP300	SET	0	1.26154	retained
O75626	Q12769	PRDM1	NUP160	SET	0.09	0.838864	retained
O75626	Q13162	PRDM1	PRDX4	SET	0	0.494109	non_nuclear
O75626	Q13263	PRDM1	TRIM28	SET	0	0.341666	retained
O75626	Q13363	PRDM1	CTBP1	SET	0.98	2.35448	retained
O75626	Q13428	PRDM1	TCOF1	SET	0	0.363332	retained
O75626	Q13547	PRDM1	HDAC1	SET	0	0.830079	retained
O75626	Q13616	PRDM1	CUL1	SET	0	1.15054	retained
O75626	Q14160	PRDM1	SCRIB	SET	0.41	1.1036	retained
O75626	Q14257	PRDM1	RCN2	SET	0.41	1.00142	frequent_flier
O75626	Q14566	PRDM1	MCM6	SET	0	1.15728	retained
O75626	Q14676	PRDM1	MDC1	SET	0.99	5.06431	frequent_flier
O75626	Q14684	PRDM1	RRP1B	SET	0.01	1.47761	retained
O75626	Q14690	PRDM1	PDCD11	SET	0.21	0.806083	frequent_flier
O75626	Q14978	PRDM1	NOLC1	SET	0.84	1.14099	frequent_flier
O75626	Q14980	PRDM1	NUMA1	SET	1	5.67696	frequent_flier
O75626	Q16718	PRDM1	NDUFA5	SET	0.45	1.05935	non_nuclear
O75626	Q1ED39	PRDM1	KNOP1	SET	0.95	1.956	retained
O75626	Q3ZCQ8	PRDM1	TIMM50	SET	0.02	0.592032	frequent_flier
O75626	Q49A26	PRDM1	GLYR1	SET	0.98	2.62782	retained
O75626	Q53H96	PRDM1	PYCRL	SET	0.42	1.49726	non_nuclear
O75626	Q7Z7K6	PRDM1	CENPV	SET	1	2.74235	frequent_flier
O75626	Q86V81	PRDM1	ALYREF	SET	0	0.641982	frequent_flier
O75626	Q86X55	PRDM1	CARM1	SET	0.8	2.02342	retained
O75626	Q8N163	PRDM1	CCAR2	SET	0	0.464247	retained
O75626	Q8WYP5	PRDM1	AHCTF1	SET	0	1.11142	retained
O75626	Q92522	PRDM1	H1FX	SET	0.61	1.72179	retained
O75626	Q92598	PRDM1	HSPH1	SET	0.17	1.44407	retained
O75626	Q93008	PRDM1	USP9X	SET	0.02	0.597801	frequent_flier
O75626	Q96EE3	PRDM1	SEH1L	SET	0.07	1.7307	retained
O75626	Q96EY1	PRDM1	DNAJA3	SET	0.43	1.20508	retained
O75626	Q9BQ67	PRDM1	GRWD1	SET	0	0.672902	retained
O75626	Q9BQA1	PRDM1	WDR77	SET	0.86	1.97081	frequent_flier
O75626	Q9BVP2	PRDM1	GNL3	SET	0	0.375973	frequent_flier
O75626	Q9BY77	PRDM1	POLDIP3	SET	0	0.606521	frequent_flier
O75626	Q9H6F5	PRDM1	CCDC86	SET	0	1.06901	retained
O75626	Q9H6R4	PRDM1	NOL6	SET	0.93	2.23248	frequent_flier
O75626	Q9H857	PRDM1	NT5DC2	SET	0	1.3475	non_nuclear
O75626	Q9HCC0	PRDM1	MCCC2	SET	0.61	3.1464	non_nuclear
O75626	Q9NP81	PRDM1	SARS2	SET	1	4.08356	frequent_flier
O75626	Q9NQ55	PRDM1	PPAN-P2RY11;PPAN	SET	0	1.0462	retained
O75626	Q9NR30	PRDM1	DDX21	SET	0	0.574309	frequent_flier
O75626	Q9NVP1	PRDM1	DDX18	SET	0.73	2.04459	retained
O75626	Q9NWT1	PRDM1	PAK1IP1	SET	0	1.25348	retained
O75626	Q9NY12	PRDM1	GAR1	SET	0.65	1.72492	retained
O75626	Q9P2R7	PRDM1	SUCLA2	SET	0	0.854714	non_nuclear
O75626	Q9UGI8	PRDM1	TES	SET	0	1.09896	retained
O75626	Q9ULT8	PRDM1	HECTD1	SET	0.45	1.49115	retained
O75626	Q9ULW0	PRDM1	TPX2	SET	0.9	2.11571	retained
O75626	Q9UNE7	PRDM1	STUB1	SET	0.01	0.683648	frequent_flier
O75626	Q9Y230	PRDM1	RUVBL2	SET	0	0.341163	frequent_flier
O75626	Q9Y265	PRDM1	RUVBL1	SET	0	0.605954	frequent_flier
O75626	Q9Y2R4	PRDM1	DDX52	SET	0.41	1.15171	retained
O75626	Q9Y2S7	PRDM1	Q9Y2S7	SET	0.9	1.73189	retained
O75626	RM	PRDM1	RM	SET	0	0.405741	non_nuclear
O75820	A6NFI3	ZNF189	A6NFI3	KRAB	0.41	1.30047	retained
O75820	A8MTY0	ZNF189	ZNF724P	KRAB	0.48	1.55856	retained
O75820	O00154	ZNF189	ACOT7	KRAB	0	0.425669	non_nuclear
O75820	O14744	ZNF189	PRMT5	KRAB	0.27	1.18592	frequent_flier
O75820	O15350	ZNF189	TP73	KRAB	0	1.3904	retained
O75820	O43143	ZNF189	DHX15	KRAB	0	0.320741	frequent_flier
O75820	O60341	ZNF189	KDM1A	KRAB	0.59	3.20619	retained
O75820	O60506	ZNF189	SYNCRIP	KRAB	0	0.166831	frequent_flier
O75820	O60832	ZNF189	DKC1	KRAB	0	0.439196	frequent_flier
O75820	O60884	ZNF189	DNAJA2	KRAB	0.04	0.766917	frequent_flier
O75820	O75190	ZNF189	DNAJB6	KRAB	0.56	1.64283	retained
O75820	O75340	ZNF189	PDCD6	KRAB	0.45	1.27308	non_nuclear
O75820	O75489	ZNF189	NDUFS3	KRAB	0	0.675227	retained
O75820	O75694	ZNF189	NUP155	KRAB	0.01	0.743997	retained
O75820	P02545	ZNF189	LMNA	KRAB	0	0.617526	retained
O75820	P03244	ZNF189	P03244	KRAB	0.38	2.36633	frequent_flier
O75820	P04637	ZNF189	TP53	KRAB	0.1	0.6544	frequent_flier
O75820	P07199	ZNF189	CENPB	KRAB	0	1.12574	retained
O75820	P07305	ZNF189	H1F0	KRAB	0.9	1.74677	retained
O75820	P08559	ZNF189	PDHA1	KRAB	0	0.535979	frequent_flier
O75820	P09874	ZNF189	PARP1	KRAB	0	0.553389	frequent_flier
O75820	P11177	ZNF189	PDHB	KRAB	0.05	0.603927	non_nuclear
O75820	P11388	ZNF189	TOP2A	KRAB	0.02	0.691014	frequent_flier
O75820	P12268	ZNF189	IMPDH2	KRAB	0	0.549396	frequent_flier
O75820	P12956	ZNF189	XRCC6	KRAB	0	0.348549	frequent_flier
O75820	P13010	ZNF189	XRCC5	KRAB	0	0.288079	frequent_flier
O75820	P13489	ZNF189	RNH1	KRAB	0	0.623993	non_nuclear
O75820	P14373	ZNF189	TRIM27	KRAB	0	1.34393	retained
O75820	P15880	ZNF189	RPS2	KRAB	0	0.272973	frequent_flier
O75820	P17029	ZNF189	ZKSCAN1	KRAB	0.99	2.75669	retained
O75820	P17096	ZNF189	HMGA1	KRAB	0	0.631433	retained
O75820	P17480	ZNF189	UBTF	KRAB	1	2.26399	retained
O75820	P17812	ZNF189	CTPS1	KRAB	0	0.42571	frequent_flier
O75820	P17980	ZNF189	PSMC3	KRAB	0.02	0.982081	retained
O75820	P18887	ZNF189	XRCC1	KRAB	0.45	1.61171	retained
O75820	P22087	ZNF189	FBL	KRAB	0	0.175003	frequent_flier
O75820	P27635	ZNF189	RPL10	KRAB	0	0.602104	frequent_flier
O75820	P28482	ZNF189	MAPK1	KRAB	0	0.80554	retained
O75820	P29590	ZNF189	PML	KRAB	0	0.989437	retained
O75820	P30153	ZNF189	PPP2R1A	KRAB	0	0.135624	frequent_flier
O75820	P31689	ZNF189	DNAJA1	KRAB	0.18	0.717266	frequent_flier
O75820	P33993	ZNF189	MCM7	KRAB	0	0.518382	frequent_flier
O75820	P35251	ZNF189	RFC1	KRAB	0	1.05221	retained
O75820	P35579	ZNF189	MYH9	KRAB	0	0.457911	frequent_flier
O75820	P35580	ZNF189	MYH10	KRAB	0	0.896976	frequent_flier
O75820	P36578	ZNF189	RPL4	KRAB	0	0.52385	frequent_flier
O75820	P46013	ZNF189	MKI67	KRAB	0.78	1.58938	frequent_flier
O75820	P47756	ZNF189	CAPZB	KRAB	0	0.698723	non_nuclear
O75820	P49366	ZNF189	DHPS	KRAB	0	1.04558	non_nuclear
O75820	P49916	ZNF189	LIG3	KRAB	0.73	2.10311	retained
O75820	P51570	ZNF189	GALK1	KRAB	0.36	1.2652	non_nuclear
O75820	P52907	ZNF189	CAPZA1	KRAB	0	0.590332	non_nuclear
O75820	P53621	ZNF189	COPA	KRAB	0	0.507774	non_nuclear
O75820	P56545	ZNF189	CTBP2	KRAB	0.06	1.27308	retained
O75820	P58107	ZNF189	P58107	KRAB	0.46	1.40563	frequent_flier
O75820	P61962	ZNF189	DCAF7	KRAB	0.28	1.22308	retained
O75820	P62195	ZNF189	PSMC5	KRAB	0.01	1.40979	retained
O75820	P63151	ZNF189	PPP2R2A	KRAB	0	0.311559	non_nuclear
O75820	P63167	ZNF189	DYNLL1	KRAB	0	0.568568	retained
O75820	P63244	ZNF189	GNB2L1	KRAB	0	0.148737	retained
O75820	P82650	ZNF189	MRPS22	KRAB	0	1.13892	non_nuclear
O75820	P82933	ZNF189	MRPS9	KRAB	0	1.15478	retained
O75820	Q02241	ZNF189	KIF23	KRAB	0.95	1.67981	retained
O75820	Q02880	ZNF189	TOP2B	KRAB	0	1.04737	retained
O75820	Q07021	ZNF189	C1QBP	KRAB	0	0.194307	retained
O75820	Q07666	ZNF189	KHDRBS1	KRAB	0	0.469376	frequent_flier
O75820	Q12769	ZNF189	NUP160	KRAB	0	0.638816	retained
O75820	Q13162	ZNF189	PRDX4	KRAB	0	0.259195	non_nuclear
O75820	Q13263	ZNF189	TRIM28	KRAB	0.26	1.38358	retained
O75820	Q13363	ZNF189	CTBP1	KRAB	0	1.00139	retained
O75820	Q13428	ZNF189	TCOF1	KRAB	0	0.350903	retained
O75820	Q13501	ZNF189	SQSTM1	KRAB	0	1.37143	retained
O75820	Q13547	ZNF189	HDAC1	KRAB	0	1.03396	retained
O75820	Q13601	ZNF189	KRR1	KRAB	0	1.26768	retained
O75820	Q14160	ZNF189	SCRIB	KRAB	0	0.865512	retained
O75820	Q14257	ZNF189	RCN2	KRAB	0.04	0.811149	frequent_flier
O75820	Q14566	ZNF189	MCM6	KRAB	0	0.672168	retained
O75820	Q14676	ZNF189	MDC1	KRAB	0.81	2.45692	frequent_flier
O75820	Q14684	ZNF189	RRP1B	KRAB	0	0.818982	retained
O75820	Q14690	ZNF189	PDCD11	KRAB	0.02	0.551001	frequent_flier
O75820	Q14839	ZNF189	CHD4	KRAB	0.3	1.57427	retained
O75820	Q14978	ZNF189	NOLC1	KRAB	0	0.350021	frequent_flier
O75820	Q14980	ZNF189	NUMA1	KRAB	0.55	1.65515	frequent_flier
O75820	Q15072	ZNF189	ZNF146	KRAB	0	1.06573	retained
O75820	Q16718	ZNF189	NDUFA5	KRAB	0	1.00229	non_nuclear
O75820	Q1ED39	ZNF189	KNOP1	KRAB	0.45	1.24415	retained
O75820	Q3KQU3	ZNF189	MAP7D1	KRAB	0	1.38085	retained
O75820	Q3ZCQ8	ZNF189	TIMM50	KRAB	0.31	0.864171	frequent_flier
O75820	Q49A26	ZNF189	GLYR1	KRAB	0	0.933732	retained
O75820	Q53H96	ZNF189	PYCRL	KRAB	0.42	1.4245	non_nuclear
O75820	Q5SY16	ZNF189	NOL9	KRAB	0.45	1.48978	retained
O75820	Q5VZL5	ZNF189	ZMYM4	KRAB	1	13.0197	non_nuclear
O75820	Q7Z3K3	ZNF189	POGZ	KRAB	0.41	1.48267	retained
O75820	Q7Z5L9	ZNF189	IRF2BP2	KRAB	0	1.1468	retained
O75820	Q7Z6Z7	ZNF189	HUWE1	KRAB	0.26	1.36865	retained
O75820	Q7Z7K6	ZNF189	CENPV	KRAB	0.92	1.47459	frequent_flier
O75820	Q86V81	ZNF189	ALYREF	KRAB	0	0.23948	frequent_flier
O75820	Q86X55	ZNF189	CARM1	KRAB	0	0.843502	retained
O75820	Q8IZL8	ZNF189	PELP1	KRAB	0.07	1.33355	retained
O75820	Q8N163	ZNF189	CCAR2	KRAB	0.11	1.29985	retained
O75820	Q8N7H5	ZNF189	PAF1	KRAB	0.82	1.54617	retained
O75820	Q8WVC0	ZNF189	LEO1	KRAB	0	1.05893	retained
O75820	Q8WYP5	ZNF189	AHCTF1	KRAB	0	1.08668	retained
O75820	Q92522	ZNF189	H1FX	KRAB	0.21	0.932298	retained
O75820	Q92598	ZNF189	HSPH1	KRAB	0	0.920286	retained
O75820	Q93008	ZNF189	USP9X	KRAB	0.91	2.83568	frequent_flier
O75820	Q96EY1	ZNF189	DNAJA3	KRAB	0	0.828781	retained
O75820	Q96T88	ZNF189	Q96T88	KRAB	0.98	3.31384	retained
O75820	Q99627	ZNF189	COPS8	KRAB	0	1.2229	retained
O75820	Q9BQ39	ZNF189	DDX50	KRAB	0.01	1.13795	retained
O75820	Q9BQ67	ZNF189	GRWD1	KRAB	0.07	0.883	retained
O75820	Q9BQA1	ZNF189	WDR77	KRAB	0	0.446287	frequent_flier
O75820	Q9BSD7	ZNF189	NTPCR	KRAB	0	0.783713	non_nuclear
O75820	Q9BVP2	ZNF189	GNL3	KRAB	0	0.446153	frequent_flier
O75820	Q9BY77	ZNF189	POLDIP3	KRAB	0	0.366818	frequent_flier
O75820	Q9BYN8	ZNF189	MRPS26	KRAB	0	1.18786	non_nuclear
O75820	Q9H2P0	ZNF189	ADNP	KRAB	0.33	1.72274	retained
O75820	Q9H6F5	ZNF189	CCDC86	KRAB	0	1.25974	retained
O75820	Q9H6R4	ZNF189	NOL6	KRAB	0	0.661756	frequent_flier
O75820	Q9H6S0	ZNF189	YTHDC2	KRAB	0.14	1.51174	retained
O75820	Q9H7D7	ZNF189	WDR26	KRAB	0	0.794983	retained
O75820	Q9HCC0	ZNF189	MCCC2	KRAB	0.14	1.79103	non_nuclear
O75820	Q9NP81	ZNF189	SARS2	KRAB	0	1.0175	frequent_flier
O75820	Q9NQ55	ZNF189	PPAN-P2RY11;PPAN	KRAB	0	1.01363	retained
O75820	Q9NR30	ZNF189	DDX21	KRAB	0	0.319425	frequent_flier
O75820	Q9NVP1	ZNF189	DDX18	KRAB	0.01	0.970764	retained
O75820	Q9NXF1	ZNF189	TEX10	KRAB	0	1.17942	retained
O75820	Q9P2K3	ZNF189	RCOR3	KRAB	0.41	1.47181	retained
O75820	Q9P2R7	ZNF189	SUCLA2	KRAB	0	0.806582	non_nuclear
O75820	Q9UBW7	ZNF189	ZMYM2	KRAB	1	9.42597	retained
O75820	Q9UKL0	ZNF189	RCOR1	KRAB	0.41	1.76851	retained
O75820	Q9UL42	ZNF189	PNMA2	KRAB	0.95	1.73688	retained
O75820	Q9ULX6	ZNF189	AKAP8L	KRAB	0.72	2.09571	retained
O75820	Q9UN30	ZNF189	SCML1	KRAB	1	2.60028	retained
O75820	Q9UNE7	ZNF189	STUB1	KRAB	0	0.49592	frequent_flier
O75820	Q9Y230	ZNF189	RUVBL2	KRAB	0	0.446053	frequent_flier
O75820	Q9Y265	ZNF189	RUVBL1	KRAB	0	0.522639	frequent_flier
O75820	Q9Y2S7	ZNF189	Q9Y2S7	KRAB	0	1.08328	retained
O75820	Q9Y3D3	ZNF189	MRPS16	KRAB	0	1.16288	non_nuclear
O75820	Q9Y4W2	ZNF189	LAS1L	KRAB	0.46	1.37558	retained
O75820	Q9Y5J7	ZNF189	TIMM9	KRAB	0	1.1468	non_nuclear
O75820	Q9Y5Q8	ZNF189	GTF3C5	KRAB	0.45	1.35297	retained
O75820	RM	ZNF189	RM	KRAB	0	0.317953	non_nuclear
O75840	O00154	KLF7	ACOT7	NONE	0.06	1.19535	non_nuclear
O75840	O00411	KLF7	POLRMT	NONE	0	1.18363	non_nuclear
O75840	O00629	KLF7	KPNA4	NONE	0	1.09643	retained
O75840	O14744	KLF7	PRMT5	NONE	0.04	0.849955	frequent_flier
O75840	O43143	KLF7	DHX15	NONE	0	0.483428	frequent_flier
O75840	O43663	KLF7	PRC1	NONE	0.5	1.65173	retained
O75840	O60506	KLF7	SYNCRIP	NONE	0	0.385258	frequent_flier
O75840	O60684	KLF7	KPNA6	NONE	0.45	1.30706	non_nuclear
O75840	O60832	KLF7	DKC1	NONE	0.03	0.783913	frequent_flier
O75840	O60884	KLF7	DNAJA2	NONE	0.49	0.933691	frequent_flier
O75840	O75190	KLF7	DNAJB6	NONE	0.89	2.2038	retained
O75840	O75340	KLF7	PDCD6	NONE	0.5	1.25248	non_nuclear
O75840	O75489	KLF7	NDUFS3	NONE	0	0.658126	retained
O75840	O75840	KLF7	KLF7	NONE	0	1	retained
O75840	P00966	KLF7	ASS1	NONE	0.45	1.42827	non_nuclear
O75840	P02545	KLF7	LMNA	NONE	0	0.807086	retained
O75840	P03244	KLF7	P03244	NONE	0.62	2.87923	frequent_flier
O75840	P04637	KLF7	TP53	NONE	0	0.187336	frequent_flier
O75840	P07858	KLF7	CTSB	NONE	0	0.756329	retained
O75840	P08559	KLF7	PDHA1	NONE	0.02	0.715137	frequent_flier
O75840	P09874	KLF7	PARP1	NONE	0.5	0.846242	frequent_flier
O75840	P11177	KLF7	PDHB	NONE	0.09	0.656433	non_nuclear
O75840	P11388	KLF7	TOP2A	NONE	0.3	0.830457	frequent_flier
O75840	P12268	KLF7	IMPDH2	NONE	0	0.574869	frequent_flier
O75840	P12532	KLF7	CKMT1A;CKMT1B	NONE	0	0.973201	non_nuclear
O75840	P12956	KLF7	XRCC6	NONE	0	0.411717	frequent_flier
O75840	P13010	KLF7	XRCC5	NONE	0	0.534772	frequent_flier
O75840	P13489	KLF7	RNH1	NONE	0	0.530704	non_nuclear
O75840	P15880	KLF7	RPS2	NONE	0	0.339138	frequent_flier
O75840	P17096	KLF7	HMGA1	NONE	0	0.543499	retained
O75840	P17812	KLF7	CTPS1	NONE	0.01	0.629609	frequent_flier
O75840	P20674	KLF7	COX5A	NONE	0	1.27054	non_nuclear
O75840	P22087	KLF7	FBL	NONE	0	0.296178	frequent_flier
O75840	P23378	KLF7	GLDC	NONE	1	9.51882	non_nuclear
O75840	P27635	KLF7	RPL10	NONE	0	0.518287	frequent_flier
O75840	P29590	KLF7	PML	NONE	0	0.977463	retained
O75840	P30153	KLF7	PPP2R1A	NONE	0	0.423112	frequent_flier
O75840	P31689	KLF7	DNAJA1	NONE	0.29	0.685287	frequent_flier
O75840	P33993	KLF7	MCM7	NONE	0.01	0.650893	frequent_flier
O75840	P35251	KLF7	RFC1	NONE	0	1.0423	retained
O75840	P35579	KLF7	MYH9	NONE	0.1	0.692784	frequent_flier
O75840	P35580	KLF7	MYH10	NONE	1	2.24711	frequent_flier
O75840	P36578	KLF7	RPL4	NONE	0	0.29666	frequent_flier
O75840	P40616	KLF7	ARL1	NONE	0	1.07806	non_nuclear
O75840	P46013	KLF7	MKI67	NONE	0.94	2.95956	frequent_flier
O75840	P47756	KLF7	CAPZB	NONE	0	0.49903	non_nuclear
O75840	P49366	KLF7	DHPS	NONE	0	1.03543	non_nuclear
O75840	P49916	KLF7	LIG3	NONE	0.48	2.2038	retained
O75840	P50570	KLF7	DNM2	NONE	0.39	1.40004	non_nuclear
O75840	P51570	KLF7	GALK1	NONE	0	0.756329	non_nuclear
O75840	P51784	KLF7	USP11	NONE	1	22.467	retained
O75840	P51858	KLF7	HDGF	NONE	0.01	1.22314	retained
O75840	P52907	KLF7	CAPZA1	NONE	0.28	1.57086	non_nuclear
O75840	P53621	KLF7	COPA	NONE	0	0.908946	non_nuclear
O75840	P56545	KLF7	CTBP2	NONE	0.06	1.25248	retained
O75840	P58107	KLF7	P58107	NONE	0.89	2.83325	frequent_flier
O75840	P62195	KLF7	PSMC5	NONE	0	0.977463	retained
O75840	P63151	KLF7	PPP2R2A	NONE	0	0.50207	non_nuclear
O75840	P63167	KLF7	DYNLL1	NONE	0	0.384411	retained
O75840	P63244	KLF7	GNB2L1	NONE	0	0.544398	retained
O75840	P82650	KLF7	MRPS22	NONE	0	1.13245	non_nuclear
O75840	P82932	KLF7	MRPS6	NONE	0	1.211	non_nuclear
O75840	Q02241	KLF7	KIF23	NONE	0.45	1.08395	retained
O75840	Q02880	KLF7	TOP2B	NONE	0	0.870877	retained
O75840	Q06210	KLF7	GFPT1	NONE	0.7	2.07028	non_nuclear
O75840	Q07021	KLF7	C1QBP	NONE	0	0.222213	retained
O75840	Q07666	KLF7	KHDRBS1	NONE	0	0.402683	frequent_flier
O75840	Q13162	KLF7	PRDX4	NONE	0	0.439607	non_nuclear
O75840	Q13263	KLF7	TRIM28	NONE	0	1.11289	retained
O75840	Q13363	KLF7	CTBP1	NONE	0.5	1.62052	retained
O75840	Q13428	KLF7	TCOF1	NONE	0	0.576236	retained
O75840	Q13547	KLF7	HDAC1	NONE	0	0.61438	retained
O75840	Q13616	KLF7	CUL1	NONE	0.98	3.035	retained
O75840	Q14160	KLF7	SCRIB	NONE	0	0.850486	retained
O75840	Q14257	KLF7	RCN2	NONE	0.8	1.5055	frequent_flier
O75840	Q14566	KLF7	MCM6	NONE	0	0.313976	retained
O75840	Q14676	KLF7	MDC1	NONE	0.82	3.11005	frequent_flier
O75840	Q14684	KLF7	RRP1B	NONE	0	0.383503	retained
O75840	Q14690	KLF7	PDCD11	NONE	0.44	1.26602	frequent_flier
O75840	Q14839	KLF7	CHD4	NONE	0.04	0.818494	retained
O75840	Q14978	KLF7	NOLC1	NONE	0	0.432625	frequent_flier
O75840	Q14980	KLF7	NUMA1	NONE	0.55	2.36463	frequent_flier
O75840	Q16718	KLF7	NDUFA5	NONE	0	0.81098	non_nuclear
O75840	Q3ZCQ8	KLF7	TIMM50	NONE	0.49	0.900983	frequent_flier
O75840	Q49A26	KLF7	GLYR1	NONE	0.5	1.89758	retained
O75840	Q6UB35	KLF7	MTHFD1L	NONE	0.04	1.35349	non_nuclear
O75840	Q7Z6Z7	KLF7	HUWE1	NONE	0.9	4.43465	retained
O75840	Q7Z7K6	KLF7	CENPV	NONE	0.96	1.93757	frequent_flier
O75840	Q86V81	KLF7	ALYREF	NONE	0.42	0.72283	frequent_flier
O75840	Q8IV08	KLF7	PLD3	NONE	0	1.211	non_nuclear
O75840	Q8N163	KLF7	CCAR2	NONE	0	0.401092	retained
O75840	Q92598	KLF7	HSPH1	NONE	0.42	1.52886	retained
O75840	Q93008	KLF7	USP9X	NONE	0.9	2.57598	frequent_flier
O75840	Q93009	KLF7	USP7	NONE	0	0.728285	retained
O75840	Q96EY1	KLF7	DNAJA3	NONE	0.18	0.949655	retained
O75840	Q9BQ39	KLF7	DDX50	NONE	0	0.678005	retained
O75840	Q9BQ67	KLF7	GRWD1	NONE	0.18	0.858606	retained
O75840	Q9BQA1	KLF7	WDR77	NONE	0.74	1.80338	frequent_flier
O75840	Q9BSD7	KLF7	NTPCR	NONE	0	0.767411	non_nuclear
O75840	Q9BSJ8	KLF7	ESYT1	NONE	0.59	2.52357	non_nuclear
O75840	Q9BVP2	KLF7	GNL3	NONE	0.01	0.649384	frequent_flier
O75840	Q9BY77	KLF7	POLDIP3	NONE	0	0.495254	frequent_flier
O75840	Q9H078	KLF7	CLPB	NONE	0	1.24952	non_nuclear
O75840	Q9H6R4	KLF7	NOL6	NONE	0.24	0.781557	frequent_flier
O75840	Q9HCC0	KLF7	MCCC2	NONE	0.03	1.42643	non_nuclear
O75840	Q9NP81	KLF7	SARS2	NONE	0.68	1.52364	frequent_flier
O75840	Q9NR30	KLF7	DDX21	NONE	0	0.480814	frequent_flier
O75840	Q9NUP9	KLF7	LIN7C	NONE	0	0.904329	non_nuclear
O75840	Q9NVP1	KLF7	DDX18	NONE	0	0.562155	retained
O75840	Q9NY12	KLF7	GAR1	NONE	0.18	1.0988	retained
O75840	Q9P2R7	KLF7	SUCLA2	NONE	0	0.790578	non_nuclear
O75840	Q9UL42	KLF7	PNMA2	NONE	0	0.925639	retained
O75840	Q9ULW0	KLF7	TPX2	NONE	0	1.35349	retained
O75840	Q9ULX6	KLF7	AKAP8L	NONE	0	0.759988	retained
O75840	Q9UNE7	KLF7	STUB1	NONE	0.07	0.816774	frequent_flier
O75840	Q9UNQ2	KLF7	DIMT1	NONE	0.5	2.65503	retained
O75840	Q9Y230	KLF7	RUVBL2	NONE	0	0.598537	frequent_flier
O75840	Q9Y265	KLF7	RUVBL1	NONE	0.07	0.807396	frequent_flier
O75840	Q9Y2S7	KLF7	Q9Y2S7	NONE	0.48	1.25248	retained
O75840	Q9Y4W2	KLF7	LAS1L	NONE	0.39	1.20221	retained
O75840	RM	KLF7	RM	NONE	0	0.271941	non_nuclear
O95863	O00629	SNAI1	KPNA4	SNAG	0	0.988646	retained
O95863	O43143	SNAI1	DHX15	SNAG	0	0.694541	frequent_flier
O95863	O60506	SNAI1	SYNCRIP	SNAG	0	0.246911	frequent_flier
O95863	O60832	SNAI1	DKC1	SNAG	1	2.88372	frequent_flier
O95863	O60884	SNAI1	DNAJA2	SNAG	0	0.507184	frequent_flier
O95863	P03244	SNAI1	P03244	SNAG	0.95	4.68143	frequent_flier
O95863	P04637	SNAI1	TP53	SNAG	0.01	0.410401	frequent_flier
O95863	P07305	SNAI1	H1F0	SNAG	0.46	1.44055	retained
O95863	P09874	SNAI1	PARP1	SNAG	0.45	1.04608	frequent_flier
O95863	P11388	SNAI1	TOP2A	SNAG	0.4	1.33882	frequent_flier
O95863	P12956	SNAI1	XRCC6	SNAG	0.31	1.08988	frequent_flier
O95863	P13010	SNAI1	XRCC5	SNAG	0.02	1.04724	frequent_flier
O95863	P15880	SNAI1	RPS2	SNAG	0	0.28226	frequent_flier
O95863	P17096	SNAI1	HMGA1	SNAG	0.01	1.10795	retained
O95863	P17480	SNAI1	UBTF	SNAG	1	3.06892	retained
O95863	P17812	SNAI1	CTPS1	SNAG	0	0.246834	frequent_flier
O95863	P18887	SNAI1	XRCC1	SNAG	0	1.41105	retained
O95863	P22087	SNAI1	FBL	SNAG	0.02	0.763649	frequent_flier
O95863	P27635	SNAI1	RPL10	SNAG	0	0.290893	frequent_flier
O95863	P30153	SNAI1	PPP2R1A	SNAG	0	0.146158	frequent_flier
O95863	P31689	SNAI1	DNAJA1	SNAG	0	0.257901	frequent_flier
O95863	P33993	SNAI1	MCM7	SNAG	0	0.558847	frequent_flier
O95863	P35579	SNAI1	MYH9	SNAG	0	0.437	frequent_flier
O95863	P35580	SNAI1	MYH10	SNAG	0	0.705277	frequent_flier
O95863	P36578	SNAI1	RPL4	SNAG	0	0.13083	frequent_flier
O95863	P46013	SNAI1	MKI67	SNAG	0.95	2.51378	frequent_flier
O95863	P49916	SNAI1	LIG3	SNAG	0.9	2.71068	retained
O95863	P63151	SNAI1	PPP2R2A	SNAG	0	0.308951	non_nuclear
O95863	P63167	SNAI1	DYNLL1	SNAG	0	0.58746	retained
O95863	P63244	SNAI1	GNB2L1	SNAG	0	0.197701	retained
O95863	Q02241	SNAI1	KIF23	SNAG	0	1.18813	retained
O95863	Q02880	SNAI1	TOP2B	SNAG	0	1.17464	retained
O95863	Q07021	SNAI1	C1QBP	SNAG	0	0.502147	retained
O95863	Q07666	SNAI1	KHDRBS1	SNAG	0	0.288561	frequent_flier
O95863	Q13263	SNAI1	TRIM28	SNAG	0	0.328056	retained
O95863	Q13428	SNAI1	TCOF1	SNAG	0.84	1.93986	retained
O95863	Q13601	SNAI1	KRR1	SNAG	0	1.328	retained
O95863	Q14676	SNAI1	MDC1	SNAG	1	8.21861	frequent_flier
O95863	Q14684	SNAI1	RRP1B	SNAG	0.99	3.17238	retained
O95863	Q14690	SNAI1	PDCD11	SNAG	0.95	2.9056	frequent_flier
O95863	Q14978	SNAI1	NOLC1	SNAG	0.36	1.06326	frequent_flier
O95863	Q14980	SNAI1	NUMA1	SNAG	0.7	2.45033	frequent_flier
O95863	Q1ED39	SNAI1	KNOP1	SNAG	0.98	2.45521	retained
O95863	Q3ZCQ8	SNAI1	TIMM50	SNAG	0	0.627839	frequent_flier
O95863	Q49A26	SNAI1	GLYR1	SNAG	0.35	1.21479	retained
O95863	Q7Z7K6	SNAI1	CENPV	SNAG	1	3.17212	frequent_flier
O95863	Q86SE8	SNAI1	NPM2	SNAG	1	5.58508	retained
O95863	Q86V81	SNAI1	ALYREF	SNAG	0	0.55207	frequent_flier
O95863	Q8N7H5	SNAI1	PAF1	SNAG	0.46	1.22579	retained
O95863	Q8N9T8	SNAI1	KRI1	SNAG	0	1.2079	retained
O95863	Q8WYP5	SNAI1	AHCTF1	SNAG	0	1.12854	retained
O95863	Q92522	SNAI1	H1FX	SNAG	0.84	1.86712	retained
O95863	Q96EY1	SNAI1	DNAJA3	SNAG	0.41	1.10527	retained
O95863	Q9BVP2	SNAI1	GNL3	SNAG	0.11	0.994423	frequent_flier
O95863	Q9BY77	SNAI1	POLDIP3	SNAG	0	0.854122	frequent_flier
O95863	Q9H6F5	SNAI1	CCDC86	SNAG	0.17	1.32152	retained
O95863	Q9H6R4	SNAI1	NOL6	SNAG	1	3.15958	frequent_flier
O95863	Q9NQ55	SNAI1	PPAN-P2RY11;PPAN	SNAG	0.4	1.75041	retained
O95863	Q9NR30	SNAI1	DDX21	SNAG	0	0.605717	frequent_flier
O95863	Q9NVP1	SNAI1	DDX18	SNAG	1	2.66925	retained
O95863	Q9NY12	SNAI1	GAR1	SNAG	0.86	1.79966	retained
O95863	Q9UNE7	SNAI1	STUB1	SNAG	0.25	1.14301	frequent_flier
O95863	Q9Y230	SNAI1	RUVBL2	SNAG	0	0.302945	frequent_flier
O95863	Q9Y2R4	SNAI1	DDX52	SNAG	1	3.26977	retained
O95863	RM	SNAI1	RM	SNAG	0	0.495468	non_nuclear
P10073	O00505	ZSCAN22	KPNA3	SCAN	0.91	1.89316	retained
P10073	O00629	ZSCAN22	KPNA4	SCAN	0.95	1.95008	retained
P10073	O14579	ZSCAN22	COPE	SCAN	0.5	1.90023	non_nuclear
P10073	O14744	ZSCAN22	PRMT5	SCAN	1	8.03604	frequent_flier
P10073	O14936	ZSCAN22	CASK	SCAN	0	1.21986	retained
P10073	O43143	ZSCAN22	DHX15	SCAN	0.39	1.61795	frequent_flier
P10073	O43242	ZSCAN22	PSMD3	SCAN	0.77	3.97383	retained
P10073	O43422	ZSCAN22	PRKRIR	SCAN	0.49	1.78722	non_nuclear
P10073	O43663	ZSCAN22	PRC1	SCAN	1	3.98509	retained
P10073	O60506	ZSCAN22	SYNCRIP	SCAN	0	1.5804	frequent_flier
P10073	O60684	ZSCAN22	KPNA6	SCAN	0.5	1.65989	non_nuclear
P10073	O60832	ZSCAN22	DKC1	SCAN	0.79	2.24256	frequent_flier
P10073	O60884	ZSCAN22	DNAJA2	SCAN	1	2.6499	frequent_flier
P10073	O75190	ZSCAN22	DNAJB6	SCAN	0	1.096	retained
P10073	O75340	ZSCAN22	PDCD6	SCAN	1	3.67925	non_nuclear
P10073	O75489	ZSCAN22	NDUFS3	SCAN	0.18	1.59769	retained
P10073	O75694	ZSCAN22	NUP155	SCAN	0	0.719703	retained
P10073	P03244	ZSCAN22	P03244	SCAN	1	15.1816	frequent_flier
P10073	P04637	ZSCAN22	TP53	SCAN	0.6	1.49281	frequent_flier
P10073	P05204	ZSCAN22	HMGN2	SCAN	1	4.22967	retained
P10073	P07305	ZSCAN22	H1F0	SCAN	0.99	2.21155	retained
P10073	P07858	ZSCAN22	CTSB	SCAN	0.71	1.74837	retained
P10073	P09132	ZSCAN22	SRP19	SCAN	0	1.18723	retained
P10073	P09874	ZSCAN22	PARP1	SCAN	1	3.82034	frequent_flier
P10073	P11177	ZSCAN22	PDHB	SCAN	0	0.551171	non_nuclear
P10073	P11388	ZSCAN22	TOP2A	SCAN	1	6.15865	frequent_flier
P10073	P12268	ZSCAN22	IMPDH2	SCAN	0	0.717727	frequent_flier
P10073	P12956	ZSCAN22	XRCC6	SCAN	1	2.99178	frequent_flier
P10073	P13010	ZSCAN22	XRCC5	SCAN	1	3.64741	frequent_flier
P10073	P13489	ZSCAN22	RNH1	SCAN	0	0.512952	non_nuclear
P10073	P15880	ZSCAN22	RPS2	SCAN	1	1.81445	frequent_flier
P10073	P17028	ZSCAN22	ZNF24	SCAN	1	9.72452	retained
P10073	P17029	ZSCAN22	ZKSCAN1	SCAN	1	4.6821	retained
P10073	P17096	ZSCAN22	HMGA1	SCAN	0.95	2.88948	retained
P10073	P17480	ZSCAN22	UBTF	SCAN	1	12.3926	retained
P10073	P17655	ZSCAN22	CAPN2	SCAN	0	1.11082	non_nuclear
P10073	P17812	ZSCAN22	CTPS1	SCAN	1	2.92748	frequent_flier
P10073	P17980	ZSCAN22	PSMC3	SCAN	1	4.78334	retained
P10073	P18887	ZSCAN22	XRCC1	SCAN	0.5	4.22967	retained
P10073	P22087	ZSCAN22	FBL	SCAN	1	2.20721	frequent_flier
P10073	P27635	ZSCAN22	RPL10	SCAN	1	3.3209	frequent_flier
P10073	P31689	ZSCAN22	DNAJA1	SCAN	1	1.95638	frequent_flier
P10073	P33993	ZSCAN22	MCM7	SCAN	0.92	2.61287	frequent_flier
P10073	P35251	ZSCAN22	RFC1	SCAN	1	3.3297	retained
P10073	P35579	ZSCAN22	MYH9	SCAN	0	1.00221	frequent_flier
P10073	P35580	ZSCAN22	MYH10	SCAN	1	3.26924	frequent_flier
P10073	P36578	ZSCAN22	RPL4	SCAN	1	5.00666	frequent_flier
P10073	P40616	ZSCAN22	ARL1	SCAN	0.96	1.90736	non_nuclear
P10073	P46013	ZSCAN22	MKI67	SCAN	1	7.13041	frequent_flier
P10073	P49916	ZSCAN22	LIG3	SCAN	1	10.313	retained
P10073	P51784	ZSCAN22	USP11	SCAN	0.46	1.43872	retained
P10073	P52294	ZSCAN22	KPNA1	SCAN	0	1.23932	retained
P10073	P52739	ZSCAN22	ZNF131	SCAN	0	1.25942	retained
P10073	P53621	ZSCAN22	COPA	SCAN	0.89	4.74843	non_nuclear
P10073	P57086	ZSCAN22	SCAND1	SCAN	1	7.71125	retained
P10073	P58107	ZSCAN22	P58107	SCAN	0.65	2.69455	frequent_flier
P10073	P61962	ZSCAN22	DCAF7	SCAN	0.84	2.13025	retained
P10073	P62195	ZSCAN22	PSMC5	SCAN	0.72	3.2115	retained
P10073	P63151	ZSCAN22	PPP2R2A	SCAN	0.12	1.36402	non_nuclear
P10073	P63167	ZSCAN22	DYNLL1	SCAN	0.02	0.960332	retained
P10073	P63244	ZSCAN22	GNB2L1	SCAN	0	1.31542	retained
P10073	Q02241	ZSCAN22	KIF23	SCAN	1	2.8267	retained
P10073	Q02880	ZSCAN22	TOP2B	SCAN	1	18.2058	retained
P10073	Q06210	ZSCAN22	GFPT1	SCAN	0.89	2.49494	non_nuclear
P10073	Q07021	ZSCAN22	C1QBP	SCAN	0	0.942422	retained
P10073	Q07666	ZSCAN22	KHDRBS1	SCAN	0.12	1.30849	frequent_flier
P10073	Q12769	ZSCAN22	NUP160	SCAN	0	1.00801	retained
P10073	Q13162	ZSCAN22	PRDX4	SCAN	0	0.267448	non_nuclear
P10073	Q13263	ZSCAN22	TRIM28	SCAN	1	3.62288	retained
P10073	Q13363	ZSCAN22	CTBP1	SCAN	0	1.11082	retained
P10073	Q13428	ZSCAN22	TCOF1	SCAN	0	0.588482	retained
P10073	Q13601	ZSCAN22	KRR1	SCAN	0.28	1.62337	retained
P10073	Q14160	ZSCAN22	SCRIB	SCAN	0	1.23224	retained
P10073	Q14257	ZSCAN22	RCN2	SCAN	1	4.15274	frequent_flier
P10073	Q14566	ZSCAN22	MCM6	SCAN	0	0.517647	retained
P10073	Q14592	ZSCAN22	ZNF460	SCAN	0.46	1.49206	retained
P10073	Q14676	ZSCAN22	MDC1	SCAN	1	15.6835	frequent_flier
P10073	Q14684	ZSCAN22	RRP1B	SCAN	0.65	3.81515	retained
P10073	Q14690	ZSCAN22	PDCD11	SCAN	1	7.24737	frequent_flier
P10073	Q14839	ZSCAN22	CHD4	SCAN	0.62	3.11753	retained
P10073	Q14978	ZSCAN22	NOLC1	SCAN	0.99	2.15768	frequent_flier
P10073	Q14980	ZSCAN22	NUMA1	SCAN	1	7.968	frequent_flier
P10073	Q15072	ZSCAN22	ZNF146	SCAN	0.46	1.64143	retained
P10073	Q15776	ZSCAN22	ZKSCAN8	SCAN	1	3.14483	retained
P10073	Q16718	ZSCAN22	NDUFA5	SCAN	0	0.98728	non_nuclear
P10073	Q1ED39	ZSCAN22	KNOP1	SCAN	0	1.12694	retained
P10073	Q3ZCQ8	ZSCAN22	TIMM50	SCAN	1	3.92726	frequent_flier
P10073	Q49A26	ZSCAN22	GLYR1	SCAN	1	5.13768	retained
P10073	Q53H96	ZSCAN22	PYCRL	SCAN	0	1.01968	non_nuclear
P10073	Q5SY16	ZSCAN22	NOL9	SCAN	1	4.04354	retained
P10073	Q6P1J9	ZSCAN22	CDC73	SCAN	0	1.17377	retained
P10073	Q6PD62	ZSCAN22	CTR9	SCAN	0	1.41775	retained
P10073	Q6ZN55	ZSCAN22	ZNF574	SCAN	1	7.71468	retained
P10073	Q7L775	ZSCAN22	EPM2AIP1	SCAN	1	7.20794	non_nuclear
P10073	Q7Z6Z7	ZSCAN22	HUWE1	SCAN	1	12.6521	retained
P10073	Q7Z7K6	ZSCAN22	CENPV	SCAN	1	4.45487	frequent_flier
P10073	Q86V81	ZSCAN22	ALYREF	SCAN	0.46	1.5562	frequent_flier
P10073	Q8IZL8	ZSCAN22	PELP1	SCAN	0.88	3.05532	retained
P10073	Q8N7H5	ZSCAN22	PAF1	SCAN	0.96	2.43937	retained
P10073	Q8N9T8	ZSCAN22	KRI1	SCAN	0	1.22467	retained
P10073	Q8NFW8	ZSCAN22	CMAS	SCAN	1	4.05842	retained
P10073	Q8TBC5	ZSCAN22	ZSCAN18	SCAN	1	18.8396	retained
P10073	Q8WYP5	ZSCAN22	AHCTF1	SCAN	1	2.64974	retained
P10073	Q92504	ZSCAN22	SLC39A7	SCAN	0.69	1.78676	non_nuclear
P10073	Q92522	ZSCAN22	H1FX	SCAN	1	5.68845	retained
P10073	Q92621	ZSCAN22	NUP205	SCAN	0	1.18271	retained
P10073	Q93008	ZSCAN22	USP9X	SCAN	0.52	2.56886	frequent_flier
P10073	Q93009	ZSCAN22	USP7	SCAN	0.18	1.11878	retained
P10073	Q96EY1	ZSCAN22	DNAJA3	SCAN	1	3.64638	retained
P10073	Q96GC6	ZSCAN22	ZNF274	SCAN	1	6.07485	retained
P10073	Q96T88	ZSCAN22	Q96T88	SCAN	0	1.06513	retained
P10073	Q9BQ39	ZSCAN22	DDX50	SCAN	0.28	2.19076	retained
P10073	Q9BQ67	ZSCAN22	GRWD1	SCAN	0.69	1.85141	retained
P10073	Q9BQ75	ZSCAN22	CMSS1	SCAN	0.48	1.7729	non_nuclear
P10073	Q9BQA1	ZSCAN22	WDR77	SCAN	1	5.6673	frequent_flier
P10073	Q9BSD7	ZSCAN22	NTPCR	SCAN	1	4.19608	non_nuclear
P10073	Q9BSJ8	ZSCAN22	ESYT1	SCAN	0	0.945229	non_nuclear
P10073	Q9BVP2	ZSCAN22	GNL3	SCAN	1	3.53481	frequent_flier
P10073	Q9BY77	ZSCAN22	POLDIP3	SCAN	0	1.33276	frequent_flier
P10073	Q9GZS3	ZSCAN22	WDR61	SCAN	0.45	1.73299	retained
P10073	Q9H6F5	ZSCAN22	CCDC86	SCAN	0.93	3.06424	retained
P10073	Q9H6R4	ZSCAN22	NOL6	SCAN	1	6.64279	frequent_flier
P10073	Q9H6S0	ZSCAN22	YTHDC2	SCAN	0.23	1.73201	retained
P10073	Q9H7D7	ZSCAN22	WDR26	SCAN	0.4	1.57636	retained
P10073	Q9NQ55	ZSCAN22	PPAN-P2RY11;PPAN	SCAN	1	6.10967	retained
P10073	Q9NR30	ZSCAN22	DDX21	SCAN	1	1.86328	frequent_flier
P10073	Q9NRL2	ZSCAN22	BAZ1A	SCAN	1	3.18044	retained
P10073	Q9NUP9	ZSCAN22	LIN7C	SCAN	0	1.05428	non_nuclear
P10073	Q9NVP1	ZSCAN22	DDX18	SCAN	1	5.9925	retained
P10073	Q9NWS9	ZSCAN22	ZNF446	SCAN	0.99	2.60761	retained
P10073	Q9NWT1	ZSCAN22	PAK1IP1	SCAN	0.5	2.86456	retained
P10073	Q9NXF1	ZSCAN22	TEX10	SCAN	0.48	1.47898	retained
P10073	Q9NY12	ZSCAN22	GAR1	SCAN	0.78	2.37968	retained
P10073	Q9P2R7	ZSCAN22	SUCLA2	SCAN	0.2	1.38471	non_nuclear
P10073	Q9UL42	ZSCAN22	PNMA2	SCAN	1	2.20395	retained
P10073	Q9ULW0	ZSCAN22	TPX2	SCAN	0	1.18723	retained
P10073	Q9ULX6	ZSCAN22	AKAP8L	SCAN	0.17	1.35091	retained
P10073	Q9UN30	ZSCAN22	SCML1	SCAN	0.96	1.86539	retained
P10073	Q9UNE7	ZSCAN22	STUB1	SCAN	0	0.550814	frequent_flier
P10073	Q9UNQ2	ZSCAN22	DIMT1	SCAN	0	1.10687	retained
P10073	Q9Y230	ZSCAN22	RUVBL2	SCAN	0	0.450484	frequent_flier
P10073	Q9Y265	ZSCAN22	RUVBL1	SCAN	0	0.792738	frequent_flier
P10073	Q9Y2R4	ZSCAN22	DDX52	SCAN	1	6.38574	retained
P10073	Q9Y2S7	ZSCAN22	Q9Y2S7	SCAN	0.46	1.25691	retained
P10073	Q9Y4W2	ZSCAN22	LAS1L	SCAN	1	3.76802	retained
P10073	Q9Y5Q8	ZSCAN22	GTF3C5	SCAN	0.48	1.43394	retained
P10073	Q9Y5Y2	ZSCAN22	NUBP2	SCAN	0.91	1.80579	non_nuclear
P10073	Q9Y6V7	ZSCAN22	DDX49	SCAN	0.48	1.49661	retained
P10073	RM	ZSCAN22	RM	SCAN	0	0.593996	non_nuclear
P10074	O00154	ZBTB48	ACOT7	BTB	0.12	1.45747	non_nuclear
P10074	O00505	ZBTB48	KPNA3	BTB	0	1.11145	retained
P10074	O00629	ZBTB48	KPNA4	BTB	0	0.979221	retained
P10074	O14579	ZBTB48	COPE	BTB	0.48	1.5919	non_nuclear
P10074	O14641	ZBTB48	DVL2	BTB	1	4.09557	retained
P10074	O14744	ZBTB48	PRMT5	BTB	1	3.3974	frequent_flier
P10074	O14874	ZBTB48	BCKDK	BTB	1	5.04566	non_nuclear
P10074	O43143	ZBTB48	DHX15	BTB	1	1.52284	frequent_flier
P10074	O43150	ZBTB48	ASAP2	BTB	1	6.01739	non_nuclear
P10074	O43663	ZBTB48	PRC1	BTB	1	55.6957	retained
P10074	O43813	ZBTB48	LANCL1	BTB	0.96	1.92998	retained
P10074	O43865	ZBTB48	AHCYL1	BTB	0.46	1.69829	non_nuclear
P10074	O60506	ZBTB48	SYNCRIP	BTB	0	0.810831	frequent_flier
P10074	O60684	ZBTB48	KPNA6	BTB	0.48	1.60025	non_nuclear
P10074	O60832	ZBTB48	DKC1	BTB	0.07	0.952579	frequent_flier
P10074	O60884	ZBTB48	DNAJA2	BTB	0.08	0.873293	frequent_flier
P10074	O75340	ZBTB48	PDCD6	BTB	0.48	1.16067	non_nuclear
P10074	O75489	ZBTB48	NDUFS3	BTB	0.24	1.23571	retained
P10074	O75694	ZBTB48	NUP155	BTB	1	5.20473	retained
P10074	P03244	ZBTB48	P03244	BTB	1	16.1471	frequent_flier
P10074	P04637	ZBTB48	TP53	BTB	0.49	1.01397	frequent_flier
P10074	P07305	ZBTB48	H1F0	BTB	0	1.00215	retained
P10074	P07858	ZBTB48	CTSB	BTB	0.43	1.3874	retained
P10074	P08559	ZBTB48	PDHA1	BTB	0.94	1.72868	frequent_flier
P10074	P09874	ZBTB48	PARP1	BTB	1	2.21855	frequent_flier
P10074	P11177	ZBTB48	PDHB	BTB	1	2.39698	non_nuclear
P10074	P11388	ZBTB48	TOP2A	BTB	0.97	2.81636	frequent_flier
P10074	P12268	ZBTB48	IMPDH2	BTB	0.01	1.04826	frequent_flier
P10074	P12270	ZBTB48	TPR	BTB	0	0.916329	retained
P10074	P12956	ZBTB48	XRCC6	BTB	1	1.63473	frequent_flier
P10074	P13010	ZBTB48	XRCC5	BTB	1	2.24523	frequent_flier
P10074	P13489	ZBTB48	RNH1	BTB	0.03	1.09089	non_nuclear
P10074	P13807	ZBTB48	GYS1	BTB	0.34	1.28101	retained
P10074	P15880	ZBTB48	RPS2	BTB	0.01	0.608064	frequent_flier
P10074	P17096	ZBTB48	HMGA1	BTB	0	0.447703	retained
P10074	P17252	ZBTB48	PRKCA	BTB	0.46	1.5125	retained
P10074	P17480	ZBTB48	UBTF	BTB	1	9.04695	retained
P10074	P17655	ZBTB48	CAPN2	BTB	0.28	1.27472	non_nuclear
P10074	P17812	ZBTB48	CTPS1	BTB	0.99	1.57327	frequent_flier
P10074	P17980	ZBTB48	PSMC3	BTB	0.39	1.74749	retained
P10074	P18887	ZBTB48	XRCC1	BTB	0.48	1.40595	retained
P10074	P20674	ZBTB48	COX5A	BTB	0	0.94852	non_nuclear
P10074	P22087	ZBTB48	FBL	BTB	0.6	1.02119	frequent_flier
P10074	P23378	ZBTB48	GLDC	BTB	1	3.43667	non_nuclear
P10074	P27635	ZBTB48	RPL10	BTB	0.93	1.33544	frequent_flier
P10074	P28482	ZBTB48	MAPK1	BTB	0.99	2.48326	retained
P10074	P30153	ZBTB48	PPP2R1A	BTB	0.44	1.15722	frequent_flier
P10074	P31689	ZBTB48	DNAJA1	BTB	0.01	0.514008	frequent_flier
P10074	P33993	ZBTB48	MCM7	BTB	0.08	0.993724	frequent_flier
P10074	P35251	ZBTB48	RFC1	BTB	0.96	1.79181	retained
P10074	P35579	ZBTB48	MYH9	BTB	0.99	1.30035	frequent_flier
P10074	P35580	ZBTB48	MYH10	BTB	1	3.90973	frequent_flier
P10074	P36578	ZBTB48	RPL4	BTB	0	0.660872	frequent_flier
P10074	P46013	ZBTB48	MKI67	BTB	1	4.03178	frequent_flier
P10074	P47756	ZBTB48	CAPZB	BTB	0.01	1.46088	non_nuclear
P10074	P49903	ZBTB48	SEPHS1	BTB	1	7.16085	non_nuclear
P10074	P49916	ZBTB48	LIG3	BTB	0.98	4.5379	retained
P10074	P51570	ZBTB48	GALK1	BTB	0	0.84739	non_nuclear
P10074	P51610	ZBTB48	HCFC1	BTB	0	1.20535	retained
P10074	P51784	ZBTB48	USP11	BTB	0.46	1.12057	retained
P10074	P52907	ZBTB48	CAPZA1	BTB	0.5	2.00639	non_nuclear
P10074	P53621	ZBTB48	COPA	BTB	0	1.21054	non_nuclear
P10074	P56545	ZBTB48	CTBP2	BTB	0.11	1.36402	retained
P10074	P57078	ZBTB48	RIPK4	BTB	0	1.07246	retained
P10074	P58107	ZBTB48	P58107	BTB	0.49	1.30912	frequent_flier
P10074	P61962	ZBTB48	DCAF7	BTB	0.34	1.24656	retained
P10074	P62993	ZBTB48	GRB2	BTB	0	1.35457	retained
P10074	P63098	ZBTB48	PPP3R1	BTB	1	3.03177	non_nuclear
P10074	P63151	ZBTB48	PPP2R2A	BTB	0.01	0.831678	non_nuclear
P10074	P63167	ZBTB48	DYNLL1	BTB	0.13	1.07323	retained
P10074	P63244	ZBTB48	GNB2L1	BTB	0	0.641665	retained
P10074	P67775	ZBTB48	PPP2CA	BTB	0.68	1.9067	retained
P10074	P82673	ZBTB48	MRPS35	BTB	0	1.22606	non_nuclear
P10074	Q02241	ZBTB48	KIF23	BTB	1	2.82541	retained
P10074	Q02880	ZBTB48	TOP2B	BTB	0.14	2.19193	retained
P10074	Q07021	ZBTB48	C1QBP	BTB	0	0.398486	retained
P10074	Q07666	ZBTB48	KHDRBS1	BTB	0.12	0.990823	frequent_flier
P10074	Q08209	ZBTB48	PPP3CA	BTB	0.5	2.32101	retained
P10074	Q12769	ZBTB48	NUP160	BTB	0.26	1.17757	retained
P10074	Q13162	ZBTB48	PRDX4	BTB	1	3.84039	non_nuclear
P10074	Q13263	ZBTB48	TRIM28	BTB	0	1.09788	retained
P10074	Q13428	ZBTB48	TCOF1	BTB	0.57	1.82759	retained
P10074	Q13547	ZBTB48	HDAC1	BTB	0	1.31707	retained
P10074	Q13616	ZBTB48	CUL1	BTB	0	1.40595	retained
P10074	Q13618	ZBTB48	CUL3	BTB	0	1.42136	retained
P10074	Q14139	ZBTB48	UBE4A	BTB	1	5.58508	non_nuclear
P10074	Q14160	ZBTB48	SCRIB	BTB	0.96	2.12052	retained
P10074	Q14257	ZBTB48	RCN2	BTB	0.78	1.55382	frequent_flier
P10074	Q14566	ZBTB48	MCM6	BTB	0	0.747082	retained
P10074	Q14676	ZBTB48	MDC1	BTB	1	6.11725	frequent_flier
P10074	Q14684	ZBTB48	RRP1B	BTB	0	0.898831	retained
P10074	Q14690	ZBTB48	PDCD11	BTB	0.35	1.05116	frequent_flier
P10074	Q14839	ZBTB48	CHD4	BTB	0.08	0.93485	retained
P10074	Q14978	ZBTB48	NOLC1	BTB	0.06	0.891114	frequent_flier
P10074	Q14980	ZBTB48	NUMA1	BTB	1	6.31932	frequent_flier
P10074	Q16718	ZBTB48	NDUFA5	BTB	0.48	1.08769	non_nuclear
P10074	Q3ZCQ8	ZBTB48	TIMM50	BTB	0.06	0.844151	frequent_flier
P10074	Q49A26	ZBTB48	GLYR1	BTB	0	0.99285	retained
P10074	Q5H9R7	ZBTB48	PPP6R3	BTB	0.48	1.23234	retained
P10074	Q5VZL5	ZBTB48	ZMYM4	BTB	0.47	2.19246	non_nuclear
P10074	Q7Z3K3	ZBTB48	POGZ	BTB	1	10.9249	retained
P10074	Q7Z6Z7	ZBTB48	HUWE1	BTB	0.5	1.69741	retained
P10074	Q7Z7K6	ZBTB48	CENPV	BTB	0.99	2.18149	frequent_flier
P10074	Q86V81	ZBTB48	ALYREF	BTB	0	0.572125	frequent_flier
P10074	Q86X55	ZBTB48	CARM1	BTB	0.86	1.8815	retained
P10074	Q8IZL8	ZBTB48	PELP1	BTB	0.15	1.45058	retained
P10074	Q8N7H5	ZBTB48	PAF1	BTB	0.49	1.4279	retained
P10074	Q8NFF5	ZBTB48	FLAD1	BTB	0.46	1.39838	non_nuclear
P10074	Q8NFW8	ZBTB48	CMAS	BTB	0.49	1.55934	retained
P10074	Q8TEM1	ZBTB48	NUP210	BTB	0	1.05138	retained
P10074	Q92522	ZBTB48	H1FX	BTB	0.12	0.791741	retained
P10074	Q92575	ZBTB48	UBXN4	BTB	1	3.6753	retained
P10074	Q92598	ZBTB48	HSPH1	BTB	0.02	1.29953	retained
P10074	Q92769	ZBTB48	HDAC2	BTB	0	1.08769	retained
P10074	Q93008	ZBTB48	USP9X	BTB	1	9.60138	frequent_flier
P10074	Q93009	ZBTB48	USP7	BTB	0.97	3.26402	retained
P10074	Q96EY1	ZBTB48	DNAJA3	BTB	0.56	1.24893	retained
P10074	Q96JM3	ZBTB48	CHAMP1	BTB	0.48	1.67959	retained
P10074	Q96T88	ZBTB48	Q96T88	BTB	0.46	1.20375	retained
P10074	Q9BQ39	ZBTB48	DDX50	BTB	0.17	1.59575	retained
P10074	Q9BQ67	ZBTB48	GRWD1	BTB	0.89	1.89063	retained
P10074	Q9BQA1	ZBTB48	WDR77	BTB	0.99	2.29851	frequent_flier
P10074	Q9BRP1	ZBTB48	PDCD2L	BTB	0.49	1.36402	non_nuclear
P10074	Q9BSD7	ZBTB48	NTPCR	BTB	0.35	1.03974	non_nuclear
P10074	Q9BSJ8	ZBTB48	ESYT1	BTB	0.99	4.26742	non_nuclear
P10074	Q9BTT6	ZBTB48	LRRC1	BTB	0.96	2.71104	non_nuclear
P10074	Q9BVP2	ZBTB48	GNL3	BTB	0.87	1.52627	frequent_flier
P10074	Q9BY77	ZBTB48	POLDIP3	BTB	0	0.573102	frequent_flier
P10074	Q9BZG1	ZBTB48	RAB34	BTB	0.49	1.67959	non_nuclear
P10074	Q9C0B1	ZBTB48	FTO	BTB	1	5.04566	retained
P10074	Q9GZS3	ZBTB48	WDR61	BTB	0.45	1.50334	retained
P10074	Q9H6R4	ZBTB48	NOL6	BTB	0.94	1.84448	frequent_flier
P10074	Q9H7D7	ZBTB48	WDR26	BTB	0.4	1.42116	retained
P10074	Q9NP81	ZBTB48	SARS2	BTB	1	5.54038	frequent_flier
P10074	Q9NR30	ZBTB48	DDX21	BTB	0	0.625425	frequent_flier
P10074	Q9NRL2	ZBTB48	BAZ1A	BTB	0.46	1.38347	retained
P10074	Q9NUP9	ZBTB48	LIN7C	BTB	0	0.979221	non_nuclear
P10074	Q9NVP1	ZBTB48	DDX18	BTB	0	0.915639	retained
P10074	Q9NY12	ZBTB48	GAR1	BTB	0.56	1.40972	retained
P10074	Q9UL42	ZBTB48	PNMA2	BTB	1	4.17572	retained
P10074	Q9ULW0	ZBTB48	TPX2	BTB	1	3.11337	retained
P10074	Q9UN30	ZBTB48	SCML1	BTB	0.5	1.5514	retained
P10074	Q9UNE7	ZBTB48	STUB1	BTB	0.35	1.10642	frequent_flier
P10074	Q9UNQ2	ZBTB48	DIMT1	BTB	0.95	1.93521	retained
P10074	Q9Y230	ZBTB48	RUVBL2	BTB	1	1.69427	frequent_flier
P10074	Q9Y265	ZBTB48	RUVBL1	BTB	0.51	1.24422	frequent_flier
P10074	Q9Y2R4	ZBTB48	DDX52	BTB	0.5	2.20705	retained
P10074	Q9Y4W2	ZBTB48	LAS1L	BTB	0	0.905488	retained
P10074	Q9Y5B8	ZBTB48	NME7	BTB	1	12.0581	non_nuclear
P10074	Q9Y5Y2	ZBTB48	NUBP2	BTB	0.46	1.48347	non_nuclear
P10074	RM	ZBTB48	RM	BTB	0	0.518772	non_nuclear
P10075	O14744	GLI4	PRMT5	NONE	0	0.478179	frequent_flier
P10075	O43143	GLI4	DHX15	NONE	0	0.313197	frequent_flier
P10075	O43663	GLI4	PRC1	NONE	0.96	3.05201	retained
P10075	O60506	GLI4	SYNCRIP	NONE	0	0.389103	frequent_flier
P10075	O60832	GLI4	DKC1	NONE	1	2.63488	frequent_flier
P10075	O60884	GLI4	DNAJA2	NONE	0.48	1.15556	frequent_flier
P10075	O75340	GLI4	PDCD6	NONE	0.5	1.52488	non_nuclear
P10075	O75489	GLI4	NDUFS3	NONE	0.1	1.18143	retained
P10075	O75962	GLI4	TRIO	NONE	1	7.30831	non_nuclear
P10075	O94964	GLI4	SOGA1	NONE	1	28.2817	non_nuclear
P10075	O95218	GLI4	ZRANB2	NONE	0.91	1.83626	retained
P10075	O95394	GLI4	PGM3	NONE	0	1.38401	retained
P10075	P03244	GLI4	P03244	NONE	1	19.6856	frequent_flier
P10075	P04637	GLI4	TP53	NONE	0.83	1.35299	frequent_flier
P10075	P07858	GLI4	CTSB	NONE	0.98	2.20435	retained
P10075	P08559	GLI4	PDHA1	NONE	0.25	1.06131	frequent_flier
P10075	P09874	GLI4	PARP1	NONE	0.48	0.975073	frequent_flier
P10075	P11177	GLI4	PDHB	NONE	0.49	1.0163	non_nuclear
P10075	P11388	GLI4	TOP2A	NONE	0.63	1.43873	frequent_flier
P10075	P12268	GLI4	IMPDH2	NONE	0	0.444912	frequent_flier
P10075	P12956	GLI4	XRCC6	NONE	0	0.457009	frequent_flier
P10075	P13010	GLI4	XRCC5	NONE	0	0.419862	frequent_flier
P10075	P13674	GLI4	P4HA1	NONE	0.66	2.22199	non_nuclear
P10075	P14373	GLI4	TRIM27	NONE	1	13.3496	retained
P10075	P15880	GLI4	RPS2	NONE	0.3	0.632376	frequent_flier
P10075	P17096	GLI4	HMGA1	NONE	0	0.559622	retained
P10075	P17480	GLI4	UBTF	NONE	1	13.6638	retained
P10075	P17812	GLI4	CTPS1	NONE	1	1.74039	frequent_flier
P10075	P17980	GLI4	PSMC3	NONE	0	0.735395	retained
P10075	P22087	GLI4	FBL	NONE	0.97	1.161	frequent_flier
P10075	P27635	GLI4	RPL10	NONE	0.53	1.31564	frequent_flier
P10075	P30153	GLI4	PPP2R1A	NONE	0	0.127864	frequent_flier
P10075	P31689	GLI4	DNAJA1	NONE	0.93	1.10201	frequent_flier
P10075	P33993	GLI4	MCM7	NONE	1	2.43355	frequent_flier
P10075	P35251	GLI4	RFC1	NONE	0.48	1.53532	retained
P10075	P35579	GLI4	MYH9	NONE	0.02	0.832531	frequent_flier
P10075	P35580	GLI4	MYH10	NONE	0.83	1.63219	frequent_flier
P10075	P36578	GLI4	RPL4	NONE	0.2	1.37634	frequent_flier
P10075	P38432	GLI4	COIL	NONE	0	1.16931	retained
P10075	P40616	GLI4	ARL1	NONE	0	1.10861	non_nuclear
P10075	P46013	GLI4	MKI67	NONE	0.99	2.91988	frequent_flier
P10075	P47756	GLI4	CAPZB	NONE	0.01	1.3672	non_nuclear
P10075	P49366	GLI4	DHPS	NONE	0	1.07154	non_nuclear
P10075	P49916	GLI4	LIG3	NONE	0.26	0.930776	retained
P10075	P51398	GLI4	DAP3	NONE	0.98	2.56739	retained
P10075	P51784	GLI4	USP11	NONE	0	0.896609	retained
P10075	P52907	GLI4	CAPZA1	NONE	0.02	1.09684	non_nuclear
P10075	P57078	GLI4	RIPK4	NONE	0	1.05391	retained
P10075	P58107	GLI4	P58107	NONE	0.44	1.12284	frequent_flier
P10075	P61962	GLI4	DCAF7	NONE	1	7.16461	retained
P10075	P63151	GLI4	PPP2R2A	NONE	0.01	0.719181	non_nuclear
P10075	P63167	GLI4	DYNLL1	NONE	0.02	0.721201	retained
P10075	P63244	GLI4	GNB2L1	NONE	0	0.67241	retained
P10075	P67775	GLI4	PPP2CA	NONE	0.39	1.52658	retained
P10075	P82650	GLI4	MRPS22	NONE	1	2.62763	non_nuclear
P10075	P82664	GLI4	MRPS10	NONE	0	1.44404	non_nuclear
P10075	P82673	GLI4	MRPS35	NONE	0	1.22131	non_nuclear
P10075	P82930	GLI4	MRPS34	NONE	0.98	2.20304	non_nuclear
P10075	P82932	GLI4	MRPS6	NONE	0	1.22131	non_nuclear
P10075	Q02880	GLI4	TOP2B	NONE	0.03	1.60877	retained
P10075	Q06210	GLI4	GFPT1	NONE	0.17	1.07702	non_nuclear
P10075	Q07021	GLI4	C1QBP	NONE	0	0.466583	retained
P10075	Q07666	GLI4	KHDRBS1	NONE	0	0.256513	frequent_flier
P10075	Q12769	GLI4	NUP160	NONE	0.51	1.4137	retained
P10075	Q12789	GLI4	GTF3C1	NONE	0	1.08362	non_nuclear
P10075	Q13263	GLI4	TRIM28	NONE	0	0.433387	retained
P10075	Q13428	GLI4	TCOF1	NONE	0.57	1.54685	retained
P10075	Q13616	GLI4	CUL1	NONE	0	1.14835	retained
P10075	Q14160	GLI4	SCRIB	NONE	0.49	1.4818	retained
P10075	Q14257	GLI4	RCN2	NONE	1	2.28052	frequent_flier
P10075	Q14566	GLI4	MCM6	NONE	0	0.882301	retained
P10075	Q14676	GLI4	MDC1	NONE	0.86	2.69578	frequent_flier
P10075	Q14684	GLI4	RRP1B	NONE	0	0.366573	retained
P10075	Q14690	GLI4	PDCD11	NONE	0.95	2.64588	frequent_flier
P10075	Q14839	GLI4	CHD4	NONE	0.15	1.20865	retained
P10075	Q14978	GLI4	NOLC1	NONE	0.62	1.04836	frequent_flier
P10075	Q14980	GLI4	NUMA1	NONE	1	3.65676	frequent_flier
P10075	Q16718	GLI4	NDUFA5	NONE	0.96	1.42156	non_nuclear
P10075	Q2M1P5	GLI4	KIF7	NONE	0.99	3.27593	non_nuclear
P10075	Q3ZCQ8	GLI4	TIMM50	NONE	1	1.91848	frequent_flier
P10075	Q49A26	GLI4	GLYR1	NONE	0.69	1.58637	retained
P10075	Q53H96	GLI4	PYCRL	NONE	0.69	1.48881	non_nuclear
P10075	Q5H9R7	GLI4	PPP6R3	NONE	0	1.2051	retained
P10075	Q5SY16	GLI4	NOL9	NONE	1	4.25814	retained
P10075	Q6PD62	GLI4	CTR9	NONE	0	1.11504	retained
P10075	Q6UB35	GLI4	MTHFD1L	NONE	1	6.47615	non_nuclear
P10075	Q7Z7K6	GLI4	CENPV	NONE	0.68	1.3405	frequent_flier
P10075	Q86V81	GLI4	ALYREF	NONE	0	0.611409	frequent_flier
P10075	Q8IZL8	GLI4	PELP1	NONE	0.5	2.13044	retained
P10075	Q8N163	GLI4	CCAR2	NONE	1	3.47657	retained
P10075	Q8N7H5	GLI4	PAF1	NONE	1	2.64208	retained
P10075	Q8WVC0	GLI4	LEO1	NONE	0.46	1.3138	retained
P10075	Q92504	GLI4	SLC39A7	NONE	0	1.00435	non_nuclear
P10075	Q92522	GLI4	H1FX	NONE	0.12	0.73985	retained
P10075	Q92552	GLI4	MRPS27	NONE	1	3.05673	non_nuclear
P10075	Q92769	GLI4	HDAC2	NONE	0.01	1.23713	retained
P10075	Q93008	GLI4	USP9X	NONE	0.79	1.99663	frequent_flier
P10075	Q96EL2	GLI4	MRPS24	NONE	0.48	1.49021	non_nuclear
P10075	Q96EY1	GLI4	DNAJA3	NONE	0.95	1.97002	retained
P10075	Q96EY7	GLI4	PTCD3	NONE	0.49	1.95004	non_nuclear
P10075	Q96PV6	GLI4	LENG8	NONE	0.46	1.53532	retained
P10075	Q9BQA1	GLI4	WDR77	NONE	0.04	0.80207	frequent_flier
P10075	Q9BRK4	GLI4	LZTS2	NONE	1	6.49239	non_nuclear
P10075	Q9BSD7	GLI4	NTPCR	NONE	0.99	2.40851	non_nuclear
P10075	Q9BSJ8	GLI4	ESYT1	NONE	0.03	1.33702	non_nuclear
P10075	Q9BTT6	GLI4	LRRC1	NONE	0.5	2.44091	non_nuclear
P10075	Q9BVP2	GLI4	GNL3	NONE	0.99	1.79759	frequent_flier
P10075	Q9BY77	GLI4	POLDIP3	NONE	0	0.419731	frequent_flier
P10075	Q9BYN8	GLI4	MRPS26	NONE	0.48	1.70762	non_nuclear
P10075	Q9GZS3	GLI4	WDR61	NONE	0.07	0.990954	retained
P10075	Q9H6R4	GLI4	NOL6	NONE	1	3.11559	frequent_flier
P10075	Q9H6S0	GLI4	YTHDC2	NONE	0	0.959247	retained
P10075	Q9H7D7	GLI4	WDR26	NONE	0.58	1.54999	retained
P10075	Q9NNW5	GLI4	WDR6	NONE	1	37.3044	non_nuclear
P10075	Q9NQG5	GLI4	RPRD1B	NONE	1	4.94762	retained
P10075	Q9NR30	GLI4	DDX21	NONE	0	0.46044	frequent_flier
P10075	Q9NVP1	GLI4	DDX18	NONE	0	0.41287	retained
P10075	Q9NY12	GLI4	GAR1	NONE	0	0.830737	retained
P10075	Q9P2R7	GLI4	SUCLA2	NONE	0.84	1.93125	non_nuclear
P10075	Q9UBW7	GLI4	ZMYM2	NONE	0.5	2.19736	retained
P10075	Q9UET6	GLI4	FTSJ1	NONE	1	9.36102	non_nuclear
P10075	Q9UL42	GLI4	PNMA2	NONE	1	5.93844	retained
P10075	Q9ULX6	GLI4	AKAP8L	NONE	0.5	1.51693	retained
P10075	Q9UN30	GLI4	SCML1	NONE	1	2.43722	retained
P10075	Q9UNQ2	GLI4	DIMT1	NONE	0.49	1.46159	retained
P10075	Q9Y230	GLI4	RUVBL2	NONE	0	0.335248	frequent_flier
P10075	Q9Y265	GLI4	RUVBL1	NONE	0	0.259165	frequent_flier
P10075	Q9Y2R4	GLI4	DDX52	NONE	0.99	2.14964	retained
P10075	Q9Y2R5	GLI4	MRPS17	NONE	1	2.47135	non_nuclear
P10075	Q9Y2S7	GLI4	Q9Y2S7	NONE	1	4.88814	retained
P10075	Q9Y3D3	GLI4	MRPS16	NONE	0.48	1.42636	non_nuclear
P10075	Q9Y3D9	GLI4	MRPS23	NONE	1	3.57891	retained
P10075	Q9Y4B5	GLI4	SOGA2	NONE	1	42.481	non_nuclear
P10075	Q9Y4W2	GLI4	LAS1L	NONE	0.98	2.53243	retained
P10075	Q9Y5Q9	GLI4	GTF3C3	NONE	0	1.2136	retained
P10075	Q9Y5Y2	GLI4	NUBP2	NONE	0.46	1.23709	non_nuclear
P10075	Q9Y676	GLI4	MRPS18B	NONE	0.48	1.41769	non_nuclear
P10075	RM	GLI4	RM	NONE	0	0.473274	non_nuclear
P11161	O00154	EGR2	ACOT7	NONE	0	0.949817	non_nuclear
P11161	O00629	EGR2	KPNA4	NONE	0	0.988646	retained
P11161	O14744	EGR2	PRMT5	NONE	1	5.81111	frequent_flier
P11161	O43143	EGR2	DHX15	NONE	0.01	0.816886	frequent_flier
P11161	O43663	EGR2	PRC1	NONE	0.46	1.30244	retained
P11161	O60506	EGR2	SYNCRIP	NONE	0	0.4454	frequent_flier
P11161	O60884	EGR2	DNAJA2	NONE	0.02	0.638789	frequent_flier
P11161	O75340	EGR2	PDCD6	NONE	0.48	1.37815	non_nuclear
P11161	O75489	EGR2	NDUFS3	NONE	0.24	1.25695	retained
P11161	O75694	EGR2	NUP155	NONE	0.08	0.876834	retained
P11161	P00966	EGR2	ASS1	NONE	0	1.29621	non_nuclear
P11161	P03244	EGR2	P03244	NONE	1	19.6765	frequent_flier
P11161	P04637	EGR2	TP53	NONE	0.85	2.3805	frequent_flier
P11161	P07858	EGR2	CTSB	NONE	0.28	1.22436	retained
P11161	P08559	EGR2	PDHA1	NONE	0.01	0.662499	frequent_flier
P11161	P09874	EGR2	PARP1	NONE	0	0.774856	frequent_flier
P11161	P11177	EGR2	PDHB	NONE	0.59	1.21807	non_nuclear
P11161	P11388	EGR2	TOP2A	NONE	0	0.428462	frequent_flier
P11161	P12268	EGR2	IMPDH2	NONE	0	0.694002	frequent_flier
P11161	P12956	EGR2	XRCC6	NONE	0	0.333328	frequent_flier
P11161	P13010	EGR2	XRCC5	NONE	0	0.55845	frequent_flier
P11161	P13807	EGR2	GYS1	NONE	1	8.07054	retained
P11161	P15880	EGR2	RPS2	NONE	0.02	0.585119	frequent_flier
P11161	P17096	EGR2	HMGA1	NONE	0	0.622989	retained
P11161	P17812	EGR2	CTPS1	NONE	0.49	1.155	frequent_flier
P11161	P18887	EGR2	XRCC1	NONE	0	1.16383	retained
P11161	P19022	EGR2	CDH2	NONE	1	6.93363	non_nuclear
P11161	P22087	EGR2	FBL	NONE	0	0.585419	frequent_flier
P11161	P27635	EGR2	RPL10	NONE	0	0.404115	frequent_flier
P11161	P28482	EGR2	MAPK1	NONE	0.94	2.2051	retained
P11161	P30153	EGR2	PPP2R1A	NONE	0	0.611857	frequent_flier
P11161	P31689	EGR2	DNAJA1	NONE	0.01	0.422251	frequent_flier
P11161	P33993	EGR2	MCM7	NONE	0.27	0.924186	frequent_flier
P11161	P35221	EGR2	CTNNA1	NONE	1	13.4067	non_nuclear
P11161	P35222	EGR2	CTNNB1	NONE	1	10.9172	retained
P11161	P35579	EGR2	MYH9	NONE	0	0.315438	frequent_flier
P11161	P35580	EGR2	MYH10	NONE	0.2	1.08954	frequent_flier
P11161	P36578	EGR2	RPL4	NONE	0	0.269784	frequent_flier
P11161	P46013	EGR2	MKI67	NONE	0.09	0.910857	frequent_flier
P11161	P47756	EGR2	CAPZB	NONE	0	0.733347	non_nuclear
P11161	P49916	EGR2	LIG3	NONE	0	0.812407	retained
P11161	P57078	EGR2	RIPK4	NONE	0	1.07945	retained
P11161	P58107	EGR2	P58107	NONE	0.5	5.35329	frequent_flier
P11161	P60510	EGR2	PPP4C	NONE	0.5	2.15271	retained
P11161	P61962	EGR2	DCAF7	NONE	1	3.46158	retained
P11161	P62993	EGR2	GRB2	NONE	0.5	2.07694	retained
P11161	P63098	EGR2	PPP3R1	NONE	1	5.11191	non_nuclear
P11161	P63151	EGR2	PPP2R2A	NONE	0.36	0.999841	non_nuclear
P11161	P63244	EGR2	GNB2L1	NONE	1	3.34314	retained
P11161	Q06210	EGR2	GFPT1	NONE	0.33	1.32094	non_nuclear
P11161	Q07021	EGR2	C1QBP	NONE	0	0.397196	retained
P11161	Q07666	EGR2	KHDRBS1	NONE	0.36	0.778928	frequent_flier
P11161	Q08209	EGR2	PPP3CA	NONE	1	4.18889	retained
P11161	Q12769	EGR2	NUP160	NONE	0.17	0.888055	retained
P11161	Q13162	EGR2	PRDX4	NONE	0	0.551566	non_nuclear
P11161	Q13263	EGR2	TRIM28	NONE	0	0.131912	retained
P11161	Q13428	EGR2	TCOF1	NONE	0	0.31198	retained
P11161	Q14257	EGR2	RCN2	NONE	0.13	0.783114	frequent_flier
P11161	Q14566	EGR2	MCM6	NONE	0.01	0.914882	retained
P11161	Q14676	EGR2	MDC1	NONE	0.43	1.57107	frequent_flier
P11161	Q14690	EGR2	PDCD11	NONE	0.03	0.630912	frequent_flier
P11161	Q14978	EGR2	NOLC1	NONE	0	0.431473	frequent_flier
P11161	Q16718	EGR2	NDUFA5	NONE	0.48	1.29408	non_nuclear
P11161	Q2M1P5	EGR2	KIF7	NONE	0.5	6.92761	non_nuclear
P11161	Q3ZCQ8	EGR2	TIMM50	NONE	0.48	1.12422	frequent_flier
P11161	Q504T8	EGR2	MIDN	NONE	1	6.66392	retained
P11161	Q53H96	EGR2	PYCRL	NONE	0.85	2.15335	non_nuclear
P11161	Q7L775	EGR2	EPM2AIP1	NONE	0.46	1.46448	non_nuclear
P11161	Q7Z7K6	EGR2	CENPV	NONE	0.49	1.15314	frequent_flier
P11161	Q86V81	EGR2	ALYREF	NONE	0	0.401745	frequent_flier
P11161	Q86X55	EGR2	CARM1	NONE	0.95	2.49217	retained
P11161	Q8NFF5	EGR2	FLAD1	NONE	0.5	4.10906	non_nuclear
P11161	Q8TEM1	EGR2	NUP210	NONE	0.23	1.50886	retained
P11161	Q8TF05	EGR2	PPP4R1	NONE	0.49	1.75912	non_nuclear
P11161	Q92522	EGR2	H1FX	NONE	0.06	0.601824	retained
P11161	Q93008	EGR2	USP9X	NONE	0.91	9.09242	frequent_flier
P11161	Q93009	EGR2	USP7	NONE	1	9.1564	retained
P11161	Q96EE3	EGR2	SEH1L	NONE	1	9.52148	retained
P11161	Q96EY1	EGR2	DNAJA3	NONE	0.41	1.10527	retained
P11161	Q96PV6	EGR2	LENG8	NONE	0.46	1.33454	retained
P11161	Q9BQA1	EGR2	WDR77	NONE	1	5.88371	frequent_flier
P11161	Q9BRP1	EGR2	PDCD2L	NONE	1	2.40545	non_nuclear
P11161	Q9BSD7	EGR2	NTPCR	NONE	0.5	1.60799	non_nuclear
P11161	Q9BVP2	EGR2	GNL3	NONE	0	0.486608	frequent_flier
P11161	Q9BY77	EGR2	POLDIP3	NONE	0	0.192852	frequent_flier
P11161	Q9GZS3	EGR2	WDR61	NONE	0.07	0.899861	retained
P11161	Q9H2D6	EGR2	TRIOBP	NONE	1	5.00249	retained
P11161	Q9H6R4	EGR2	NOL6	NONE	0.9	1.71668	frequent_flier
P11161	Q9H7D7	EGR2	WDR26	NONE	0.46	1.44014	retained
P11161	Q9NP81	EGR2	SARS2	NONE	0.35	1.31006	frequent_flier
P11161	Q9NR30	EGR2	DDX21	NONE	0	0.315103	frequent_flier
P11161	Q9NUP9	EGR2	LIN7C	NONE	0	0.988646	non_nuclear
P11161	Q9NVP1	EGR2	DDX18	NONE	0	0.393597	retained
P11161	Q9P2R7	EGR2	SUCLA2	NONE	0.46	1.64644	non_nuclear
P11161	Q9UKN8	EGR2	GTF3C4	NONE	0	1.21447	retained
P11161	Q9ULX6	EGR2	AKAP8L	NONE	0	0.862618	retained
P11161	Q9UNE7	EGR2	STUB1	NONE	0	0.62662	frequent_flier
P11161	Q9Y230	EGR2	RUVBL2	NONE	0.49	1.16764	frequent_flier
P11161	Q9Y265	EGR2	RUVBL1	NONE	0.51	1.4055	frequent_flier
P11161	Q9Y2S7	EGR2	Q9Y2S7	NONE	1	6.10371	retained
P11161	Q9Y4W2	EGR2	LAS1L	NONE	0	0.759882	retained
P11161	RM	EGR2	RM	NONE	0	0.537788	non_nuclear
P13682	O00154	ZNF35	ACOT7	NONE	0	0.489727	non_nuclear
P13682	O14744	ZNF35	PRMT5	NONE	0.07	0.853914	frequent_flier
P13682	O43143	ZNF35	DHX15	NONE	0.01	0.904446	frequent_flier
P13682	O60506	ZNF35	SYNCRIP	NONE	0	0.758677	frequent_flier
P13682	O60832	ZNF35	DKC1	NONE	0.36	1.2536	frequent_flier
P13682	P02545	ZNF35	LMNA	NONE	0	0.700014	retained
P13682	P03244	ZNF35	P03244	NONE	1	5.27885	frequent_flier
P13682	P04637	ZNF35	TP53	NONE	0.04	0.585103	frequent_flier
P13682	P09874	ZNF35	PARP1	NONE	0.55	1.1289	frequent_flier
P13682	P11388	ZNF35	TOP2A	NONE	0.38	1.24968	frequent_flier
P13682	P12268	ZNF35	IMPDH2	NONE	0	0.470427	frequent_flier
P13682	P12532	ZNF35	CKMT1A;CKMT1B	NONE	0	1.067	non_nuclear
P13682	P12956	ZNF35	XRCC6	NONE	0	0.563758	frequent_flier
P13682	P13010	ZNF35	XRCC5	NONE	0	0.544054	frequent_flier
P13682	P15880	ZNF35	RPS2	NONE	0	0.410196	frequent_flier
P13682	P17096	ZNF35	HMGA1	NONE	0	0.665804	retained
P13682	P17812	ZNF35	CTPS1	NONE	0	0.392922	frequent_flier
P13682	P22087	ZNF35	FBL	NONE	0	0.518127	frequent_flier
P13682	P27635	ZNF35	RPL10	NONE	0	0.448173	frequent_flier
P13682	P30153	ZNF35	PPP2R1A	NONE	0	0.4259	frequent_flier
P13682	P31689	ZNF35	DNAJA1	NONE	0	0.447935	frequent_flier
P13682	P35579	ZNF35	MYH9	NONE	0.02	0.880295	frequent_flier
P13682	P35580	ZNF35	MYH10	NONE	1	3.01329	frequent_flier
P13682	P36578	ZNF35	RPL4	NONE	0	0.303195	frequent_flier
P13682	P46013	ZNF35	MKI67	NONE	0.93	2.76055	frequent_flier
P13682	P47756	ZNF35	CAPZB	NONE	0	0.699441	non_nuclear
P13682	P49916	ZNF35	LIG3	NONE	0	0.956882	retained
P13682	P50570	ZNF35	DNM2	NONE	0	0.927498	non_nuclear
P13682	P51570	ZNF35	GALK1	NONE	0	0.837238	non_nuclear
P13682	P52907	ZNF35	CAPZA1	NONE	0.01	1.02496	non_nuclear
P13682	P57078	ZNF35	RIPK4	NONE	0	1.06642	retained
P13682	P58107	ZNF35	P58107	NONE	0.09	0.624879	frequent_flier
P13682	P61962	ZNF35	DCAF7	NONE	0.88	2.21083	retained
P13682	P63151	ZNF35	PPP2R2A	NONE	0	0.505103	non_nuclear
P13682	P63167	ZNF35	DYNLL1	NONE	0.04	0.853221	retained
P13682	P63244	ZNF35	GNB2L1	NONE	0	0.345673	retained
P13682	Q02241	ZNF35	KIF23	NONE	0	0.962071	retained
P13682	Q02880	ZNF35	TOP2B	NONE	0.04	1.31224	retained
P13682	Q07021	ZNF35	C1QBP	NONE	0	0.385314	retained
P13682	Q07666	ZNF35	KHDRBS1	NONE	0	0.617441	frequent_flier
P13682	Q13162	ZNF35	PRDX4	NONE	0	0.556879	non_nuclear
P13682	Q13263	ZNF35	TRIM28	NONE	0	1.32413	retained
P13682	Q13428	ZNF35	TCOF1	NONE	0	0.858692	retained
P13682	Q14257	ZNF35	RCN2	NONE	0	0.551869	frequent_flier
P13682	Q14566	ZNF35	MCM6	NONE	0	0.319814	retained
P13682	Q14676	ZNF35	MDC1	NONE	0.87	3.47137	frequent_flier
P13682	Q14690	ZNF35	PDCD11	NONE	0.66	1.451	frequent_flier
P13682	Q14978	ZNF35	NOLC1	NONE	0	0.53001	frequent_flier
P13682	Q14980	ZNF35	NUMA1	NONE	0.5	1.66421	frequent_flier
P13682	Q149M9	ZNF35	NWD1	NONE	0	1.52072	non_nuclear
P13682	Q3ZCQ8	ZNF35	TIMM50	NONE	0	0.619435	frequent_flier
P13682	Q7Z7K6	ZNF35	CENPV	NONE	0.99	2.52569	frequent_flier
P13682	Q86V81	ZNF35	ALYREF	NONE	0	0.633395	frequent_flier
P13682	Q86X55	ZNF35	CARM1	NONE	0	0.903156	retained
P13682	Q8N163	ZNF35	CCAR2	NONE	0	0.581345	retained
P13682	Q92522	ZNF35	H1FX	NONE	0.06	0.573356	retained
P13682	Q92598	ZNF35	HSPH1	NONE	0	0.728901	retained
P13682	Q96T88	ZNF35	Q96T88	NONE	0	0.985019	retained
P13682	Q9BQ39	ZNF35	DDX50	NONE	0	0.925059	retained
P13682	Q9BQA1	ZNF35	WDR77	NONE	0.53	1.3809	frequent_flier
P13682	Q9BVP2	ZNF35	GNL3	NONE	0	0.390775	frequent_flier
P13682	Q9BY77	ZNF35	POLDIP3	NONE	0	0.340554	frequent_flier
P13682	Q9H6R4	ZNF35	NOL6	NONE	0.94	1.81693	frequent_flier
P13682	Q9NP81	ZNF35	SARS2	NONE	0.46	1.47226	frequent_flier
P13682	Q9NR30	ZNF35	DDX21	NONE	0.07	0.787473	frequent_flier
P13682	Q9NY12	ZNF35	GAR1	NONE	0.56	1.39337	retained
P13682	Q9NYL2	ZNF35	Q9NYL2	NONE	0	1.4935	retained
P13682	Q9UNE7	ZNF35	STUB1	NONE	0.01	0.711591	frequent_flier
P13682	Q9Y230	ZNF35	RUVBL2	NONE	0	0.283221	frequent_flier
[truncated: 9,583 more rows]
