# Supplementary material for: Multiparameter functional diversity of human C2H2 zinc finger proteins
Source: Genome Res. 2016 Dec;26(12):1742–52. doi: 10.1101/gr.209643.116 (PMC5131825; doi:10.1101/gr.209643.116)
Supplement: Supplemental Material [file supp_gr.209643.116_Supplemental_Table_S6.xlsx]

## Sheet: Legend
Supplemental Table S6 (related to Figure 5): Table with SAINT Scores for the protein-protein interactions. The first page shows a table indicating the fold change spectral count and SAINT confidence score (AvgP) for each interaction with a prey that has at least one interaction with AvgP=1. A total of 118 C2H2 baits, 388 preys and 11582 interactions are listed. 'Filtering' column denotes whether …

## Sheet: PPI Summary Table
	Bait	BaitEffectorDomain	Bait_UniProtID	PreyGene	AvgP	FoldChangeSPC	Filtering
0	ZIM3	KRAB-A	Q96PE6	KPNA4	0	1.14022	retained
1	ZNF708	KRAB-A	P17019	KPNA4	0.98	2.1133	retained
2	FEZF1	NONE	A0PJY2	KPNA4	0.5	1.76651	retained
3	MAZ	NONE	P56270	KPNA4	0	0.940825	retained
4	ZNF329	NONE	Q86UD4	KPNA4	0	1.02759	retained
5	OSR2	NONE	Q8N2R0	KPNA4	0.41	1.29961	retained
6	KLF7	NONE	O75840	KPNA4	0	1.09643	retained
7	ZNF669	KRAB-A	Q96BR6	KPNA4	0	1.11094	retained
8	ZNF547	KRAB-A	Q8IVP9	KPNA4	0	0.922087	retained
9	ZNF436	KRAB-A	Q9C0F3	KPNA4	0.5	1.81246	retained
10	SCRT1	SNAG	Q9BWW7	KPNA4	0	0.98156	retained
11	ZNF768	NONE	Q9H5H4	KPNA4	0.98	2.48416	retained
12	KLF1	NONE	Q13351	KPNA4	0.5	1.57317	retained
13	ZFP82	KRAB-A	Q8N141	KPNA4	0.82	1.50758	retained
14	GTF3A	NONE	Q92664	KPNA4	0	1.13969	retained
15	ZNF71	NONE	Q9NQZ8	KPNA4	0.41	1.05885	retained
16	ZNF594	NONE	Q96JF6	KPNA4	0	0.913375	retained
17	ZNF280A	NONE	P59817	KPNA4	0	1.23774	retained
18	ZNF320	KRAB-A	A2RRD8	KPNA4	0	0.97893	retained
19	ZNF140	KRAB-A	P52738	H1F0	0	1.08329	retained
20	ZNF322	NONE	Q6U7Q0	H1F0	0.41	1.18226	retained
21	ZFP28	KRAB-A	Q8NHY6	H1F0	0	1.01949	retained
22	ZNF594	NONE	Q96JF6	H1F0	0.41	1.13937	retained
23	ZBTB14	BTB	O43829	H1F0	0.5	1.90433	retained
24	MAZ	NONE	P56270	H1F0	0.48	1.37617	retained
25	ZNF189	KRAB-A	O75820	H1F0	0.9	1.74677	retained
26	ZNF595	KRAB-A	Q8IYB9	H1F0	0	1.06965	retained
27	ZBTB42	BTB	B2RXF5	H1F0	0	1.01978	retained
28	ZNF436	KRAB-A	Q9C0F3	H1F0	0.41	1.09948	retained
29	ZNF596	KRAB-A	Q8TC21	H1F0	0	0.99968	retained
30	PRDM1	SET	O75626	H1F0	0.48	1.60985	retained
31	ZNF419	KRAB-A	Q96HQ0	H1F0	0.41	1.35221	retained
32	ZFP82	KRAB-A	Q8N141	H1F0	0.41	1.14793	retained
33	ZNF214	KRAB-A	Q9UL59	H1F0	0	1.15745	retained
34	ZNF667	KRAB-A	Q5HYK9	H1F0	0	1.20609	retained
35	ZNF16	NONE	P17020	H1F0	0	1.03129	retained
36	ZNF71	NONE	Q9NQZ8	H1F0	0.9	1.66744	retained
37	ZNF778	KRAB-A	Q96MU6	H1F0	0	1.25284	retained
38	ZNF770	NONE	Q6IQ21	H1F0	0.41	1.41125	retained
39	ZNF768	NONE	Q9H5H4	H1F0	0	0.946323	retained
40	ZNF214	KRAB-A	Q9UL59	LMNA	0	1.08387	retained
41	ZNF331	KRAB-A	Q9NQX6	LMNA	0	1.00962	retained
42	ZNF34	KRAB-A	Q8IZ26	LMNA	0	0.671695	retained
43	ZNF596	KRAB-A	Q8TC21	LMNA	0	1.57908	retained
44	ZNF594	NONE	Q96JF6	LMNA	0	1.46623	retained
45	ZNF595	KRAB-A	Q8IYB9	LMNA	0	0.85029	retained
46	ZNF71	NONE	Q9NQZ8	LMNA	0	0.458368	retained
47	ZNF816	KRAB-A	Q0VGE8	LMNA	0	1.28991	retained
48	IKZF3	NONE	Q9UKT9	LMNA	0	0.459868	retained
49	ZNF320	KRAB-A	A2RRD8	LMNA	0	0.713205	retained
50	ZNF708	KRAB-A	P17019	LMNA	0	0.522598	retained
51	FEZF1	NONE	A0PJY2	LMNA	0	0.555673	retained
52	ZBTB14	BTB	O43829	LMNA	0	0.631438	retained
53	KLF7	NONE	O75840	LMNA	0	0.807086	retained
54	ZNF436	KRAB-A	Q9C0F3	LMNA	0	0.464429	retained
55	ZNF768	NONE	Q9H5H4	LMNA	0	0.511808	retained
56	KLF1	NONE	Q13351	LMNA	0.5	2.64962	retained
57	ZNF513	NONE	Q8N8E2	LMNA	0	0.890292	retained
58	ZNF667	KRAB-A	Q5HYK9	LMNA	0	0.700494	retained
59	ZFP28	KRAB-A	Q8NHY6	LMNA	0	0.615304	retained
60	ZBTB6	BTB	Q15916	LMNA	0	1.83956	retained
61	ZNF322	NONE	Q6U7Q0	LMNA	1	7.90848	retained
62	ZNF189	KRAB-A	O75820	LMNA	0	0.617526	retained
63	PATZ1	BTB	Q9HBE1	LMNA	0	0.664077	retained
64	ZNF610	KRAB-A	Q8N9Z0	LMNA	0	2.01196	retained
65	ZNF549	KRAB-A	Q6P9A3	LMNA	0	0.805929	retained
66	MAZ	NONE	P56270	LMNA	0	2.02085	retained
67	ZNF547	KRAB-A	Q8IVP9	LMNA	0	0.513993	retained
68	PRDM1	SET	O75626	LMNA	0	0.561223	retained
69	ZNF778	KRAB-A	Q96MU6	LMNA	0	0.773097	retained
70	ZNF37A	KRAB-A	P17032	LMNA	0	1.02516	retained
71	ZNF394	KRAB-A;SCAN	Q53GI3	LMNA	0	3.04419	retained
72	ZSCAN30	SCAN	Q86W11	LMNA	0	1.75257	retained
73	ZNF331	KRAB-A	Q9NQX6	LAS1L	0.09	1.10256	retained
74	ZNF250	KRAB-A	P15622	LAS1L	0	0.681773	retained
75	ZNF257	KRAB-A	Q9Y2Q1	LAS1L	0.86	2.88553	retained
76	ZNF34	KRAB-A	Q8IZ26	LAS1L	0.97	2.75322	retained
77	ZNF18	KRAB-A;SCAN	P17022	LAS1L	0.78	2.21907	retained
78	ZNF490	KRAB-A	Q9ULM2	LAS1L	0.62	1.83445	retained
79	ZNF16	NONE	P17020	LAS1L	0.49	1.79801	retained
80	ZNF71	NONE	Q9NQZ8	LAS1L	0.32	1.13395	retained
81	ZSCAN5C	SCAN	A6NGD5	LAS1L	0.09	0.804158	retained
82	ZNF140	KRAB-A	P52738	LAS1L	0.09	1.06076	retained
83	ZNF708	KRAB-A	P17019	LAS1L	0.46	1.40382	retained
84	FEZF1	NONE	A0PJY2	LAS1L	0.72	1.92812	retained
85	MZF1	SCAN	P28698	LAS1L	0.23	1.36556	retained
86	ZNF8	KRAB-A	P17098	LAS1L	0.09	1.09658	retained
87	KLF7	NONE	O75840	LAS1L	0.39	1.20221	retained
88	ZNF436	KRAB-A	Q9C0F3	LAS1L	0.39	1.01444	retained
89	ZNF768	NONE	Q9H5H4	LAS1L	1	4.51027	retained
90	ZNF419	KRAB-A	Q96HQ0	LAS1L	0.32	1.24521	retained
91	ZNF418	KRAB-A	Q8TF45	LAS1L	0	0.892863	retained
92	ZNF513	NONE	Q8N8E2	LAS1L	0	0.881003	retained
93	ZNF667	KRAB-A	Q5HYK9	LAS1L	0.23	1.04895	retained
94	ZFP28	KRAB-A	Q8NHY6	LAS1L	0.49	1.75712	retained
95	ZNF320	KRAB-A	A2RRD8	LAS1L	0.09	1.06356	retained
96	ZNF329	NONE	Q86UD4	LAS1L	0.47	1.50928	retained
97	ZNF189	KRAB-A	O75820	LAS1L	0.46	1.37558	retained
98	OSR2	NONE	Q8N2R0	LAS1L	0.23	1.07977	retained
99	ZFP82	KRAB-A	Q8N141	LAS1L	1	4.22985	retained
100	ZNF610	KRAB-A	Q8N9Z0	LAS1L	0	0.890579	retained
101	ZNF502	NONE	Q8TBZ5	LAS1L	0.18	1.57166	retained
102	GTF3A	NONE	Q92664	LAS1L	0.09	0.989827	retained
103	ZBTB42	BTB	B2RXF5	LAS1L	0.23	1.10133	retained
104	ZNF37A	KRAB-A	P17032	LAS1L	0.72	2.62926	retained
105	ZNF563	KRAB-A	Q8TA94	LAS1L	1	3.32436	retained
106	ZNF770	NONE	Q6IQ21	LAS1L	0.39	1.35029	retained
107	ZNF214	KRAB-A	Q9UL59	DDX18	0	0.988254	retained
108	IKZF3	NONE	Q9UKT9	DDX18	0.01	0.561482	retained
109	ZNF250	KRAB-A	P15622	DDX18	0	0.893445	retained
110	ZNF692	NONE	Q9BU19	DDX18	0	0.893644	retained
111	SCRT1	SNAG	Q9BWW7	DDX18	0	0.855547	retained
112	ZNF594	NONE	Q96JF6	DDX18	0.1	0.902162	retained
113	ZNF595	KRAB-A	Q8IYB9	DDX18	0	1.00949	retained
114	ZNF16	NONE	P17020	DDX18	0	1.24128	retained
115	ZNF71	NONE	Q9NQZ8	DDX18	0.26	1.13221	retained
116	ZNF816	KRAB-A	Q0VGE8	DDX18	0	0.90125	retained
117	ZSCAN5C	SCAN	A6NGD5	DDX18	0	0.798595	retained
118	ZNF320	KRAB-A	A2RRD8	DDX18	0	0.581082	retained
119	ZNF140	KRAB-A	P52738	DDX18	0	0.885173	retained
120	ZNF708	KRAB-A	P17019	DDX18	0	0.947952	retained
121	FEZF1	NONE	A0PJY2	DDX18	0.23	1.21524	retained
122	ZBTB14	BTB	O43829	DDX18	0	0.421291	retained
123	ZNF547	KRAB-A	Q8IVP9	DDX18	0	0.427706	retained
124	ZFP3	NONE	Q96NJ6	DDX18	0	0.40085	retained
125	KLF7	NONE	O75840	DDX18	0	0.562155	retained
126	ZNF436	KRAB-A	Q9C0F3	DDX18	0.5	1.29728	retained
127	ZNF768	NONE	Q9H5H4	DDX18	1	1.97023	retained
128	ZNF419	KRAB-A	Q96HQ0	DDX18	0	0.763135	retained
129	ZNF418	KRAB-A	Q8TF45	DDX18	0	0.448449	retained
130	ZNF513	NONE	Q8N8E2	DDX18	0	0.713299	retained
131	ZNF667	KRAB-A	Q5HYK9	DDX18	0	0.63174	retained
132	ZNF184	KRAB-A	Q99676	DDX18	0.01	1.73084	retained
133	ZFP28	KRAB-A	Q8NHY6	DDX18	0	0.832614	retained
134	GLIS1	NONE	Q8NBF1	DDX18	0	0.512845	retained
135	KLF1	NONE	Q13351	DDX18	0	0.566787	retained
136	ZNF322	NONE	Q6U7Q0	DDX18	0	0.711635	retained
137	ZNF329	NONE	Q86UD4	DDX18	0.03	1.00428	retained
138	ZNF189	KRAB-A	O75820	DDX18	0.01	0.970764	retained
139	ZNF582	KRAB-A	Q96NG8	DDX18	0	0.462002	retained
140	MYNN	BTB	Q9NPC7	DDX18	0	0.718767	retained
141	ZFP82	KRAB-A	Q8N141	DDX18	0.51	1.69709	retained
142	PATZ1	BTB	Q9HBE1	DDX18	0	0.88923	retained
143	ZNF610	KRAB-A	Q8N9Z0	DDX18	0	0.540686	retained
144	ZNF394	KRAB-A;SCAN	Q53GI3	DDX18	0	0.625967	retained
145	MAZ	NONE	P56270	DDX18	0	0.453934	retained
146	ZNF449	SCAN	Q6P9G9	DDX18	0	0.875427	retained
147	ZNF280A	NONE	P59817	DDX18	0	0.594661	retained
148	GTF3A	NONE	Q92664	DDX18	0	0.687726	retained
149	ZBTB42	BTB	B2RXF5	DDX18	0	0.691101	retained
150	PRDM1	SET	O75626	DDX18	0.73	2.04459	retained
151	ZNF778	KRAB-A	Q96MU6	DDX18	0	0.801627	retained
152	ZNF596	KRAB-A	Q8TC21	DDX18	0.03	1.23871	retained
153	ZIM3	KRAB-A	Q96PE6	DDX18	0	0.711746	retained
154	ZNF563	KRAB-A	Q8TA94	DDX18	0	0.295093	retained
155	ZNF770	NONE	Q6IQ21	DDX18	0	0.942727	retained
156	ZSCAN30	SCAN	Q86W11	DDX18	0.46	1.30016	retained
157	ZNF513	NONE	Q8N8E2	DIAPH1	0.5	3.38937	non_nuclear
158	MAZ	NONE	P56270	DIAPH1	0	1.24363	non_nuclear
159	ZSCAN30	SCAN	Q86W11	DIAPH1	0.41	1.50309	non_nuclear
160	ZBTB42	BTB	B2RXF5	RCOR1	1	3.37229	retained
161	ZNF189	KRAB-A	O75820	RCOR1	0.41	1.76851	retained
162	ZSCAN5C	SCAN	A6NGD5	RCOR1	1	3.34953	retained
163	MYNN	BTB	Q9NPC7	RCOR1	1	27.485	retained
164	ZFP28	KRAB-A	Q8NHY6	TRIM27	0.45	1.39487	retained
165	FEZF1	NONE	A0PJY2	TRIM27	0	1.36813	retained
166	ZNF331	KRAB-A	Q9NQX6	TRIM27	0	1.39543	retained
167	ZNF250	KRAB-A	P15622	TRIM27	0	1.1149	retained
168	ZNF189	KRAB-A	O75820	TRIM27	0	1.34393	retained
169	ZNF669	KRAB-A	Q96BR6	TRIM27	0	1.20431	retained
170	ZBTB42	BTB	B2RXF5	TRIM27	0	1.15064	retained
171	ZNF436	KRAB-A	Q9C0F3	TRIM27	0	1.0862	retained
172	ZNF768	NONE	Q9H5H4	TRIM27	1	4.64514	retained
173	ZNF419	KRAB-A	Q96HQ0	TRIM27	1	2.29135	retained
174	ZNF490	KRAB-A	Q9ULM2	TRIM27	1	5.85297	retained
175	ZNF513	NONE	Q8N8E2	TRIM27	0	1.18549	retained
176	ZNF16	NONE	P17020	TRIM27	0.45	1.40252	retained
177	ZNF563	KRAB-A	Q8TA94	TRIM27	0.91	1.85187	retained
178	ZNF667	KRAB-A	Q5HYK9	TRIM27	0.95	3.31077	retained
179	ZNF436	KRAB-A	Q9C0F3	RAB34	0	1.13815	non_nuclear
180	ZNF708	KRAB-A	P17019	RAB34	1	3.86789	non_nuclear
181	ZNF768	NONE	Q9H5H4	RAB34	0.5	2.13753	non_nuclear
182	ZFP28	KRAB-A	Q8NHY6	RAB34	0	1.18564	non_nuclear
183	ZNF595	KRAB-A	Q8IYB9	RAB34	0	1.20462	non_nuclear
184	ZNF140	KRAB-A	P52738	ECH1	0	1.00463	non_nuclear
185	KLF1	NONE	Q13351	ECH1	0.34	2.20043	non_nuclear
186	ZNF320	KRAB-A	A2RRD8	ECH1	0	1.28315	non_nuclear
187	ZNF322	NONE	Q6U7Q0	ECH1	1	7.13486	non_nuclear
188	MAZ	NONE	P56270	ECH1	0.44	2.67592	non_nuclear
189	ZNF436	KRAB-A	Q9C0F3	ECH1	0	0.78691	non_nuclear
190	SCRT1	SNAG	Q9BWW7	ECH1	0	1.47948	non_nuclear
191	ZSCAN5C	SCAN	A6NGD5	ECH1	0	1.00311	non_nuclear
192	ZNF594	NONE	Q96JF6	ECH1	0.01	1.70196	non_nuclear
193	PATZ1	BTB	Q9HBE1	ECH1	0	1.41763	non_nuclear
194	ZNF394	KRAB-A;SCAN	Q53GI3	ECH1	0	2.06268	non_nuclear
195	IKZF3	NONE	Q9UKT9	ECH1	0.01	1.61309	non_nuclear
196	ZSCAN30	SCAN	Q86W11	ECH1	0	2.20274	non_nuclear
197	ZNF547	KRAB-A	Q8IVP9	ZNF805	1	2.84507	retained
198	ZNF708	KRAB-A	P17019	ZNF805	0	1.25136	retained
199	ZNF331	KRAB-A	Q9NQX6	MCM6	0	0.424887	retained
200	ZNF250	KRAB-A	P15622	MCM6	0.12	1.53065	retained
201	ZNF595	KRAB-A	Q8IYB9	MCM6	0	0.870589	retained
202	ZSCAN5C	SCAN	A6NGD5	MCM6	0	0.324599	retained
203	SCRT1	SNAG	Q9BWW7	MCM6	0	0.682582	retained
204	ZNF594	NONE	Q96JF6	MCM6	0	0.775293	retained
205	ZNF490	KRAB-A	Q9ULM2	MCM6	0	1.10337	retained
206	ZNF16	NONE	P17020	MCM6	0	0.519665	retained
207	ZNF71	NONE	Q9NQZ8	MCM6	0.93	2.03912	retained
208	ZNF816	KRAB-A	Q0VGE8	MCM6	0	0.612114	retained
209	IKZF3	NONE	Q9UKT9	MCM6	0	0.488305	retained
210	ZNF140	KRAB-A	P52738	MCM6	0	0.540714	retained
211	ZNF708	KRAB-A	P17019	MCM6	0	0.457789	retained
212	FEZF1	NONE	A0PJY2	MCM6	0.01	1.4642	retained
213	ZBTB42	BTB	B2RXF5	MCM6	0	0.498301	retained
214	ZFP3	NONE	Q96NJ6	MCM6	0	0.594176	retained
215	KLF7	NONE	O75840	MCM6	0	0.313976	retained
216	ZNF436	KRAB-A	Q9C0F3	MCM6	0	0.545438	retained
217	ZNF768	NONE	Q9H5H4	MCM6	0.99	2.75654	retained
218	KLF1	NONE	Q13351	MCM6	0	0.454465	retained
219	ZNF418	KRAB-A	Q8TF45	MCM6	0	0.465503	retained
220	ZNF513	NONE	Q8N8E2	MCM6	0	0.836984	retained
221	ZIM3	KRAB-A	Q96PE6	MCM6	0	1.5058	retained
222	ZFP28	KRAB-A	Q8NHY6	MCM6	0	0.49779	retained
223	ZNF320	KRAB-A	A2RRD8	MCM6	0	1.09488	retained
224	ZNF322	NONE	Q6U7Q0	MCM6	0	0.49	retained
225	ZNF329	NONE	Q86UD4	MCM6	0	0.634544	retained
226	ZNF189	KRAB-A	O75820	MCM6	0	0.672168	retained
227	OSR2	NONE	Q8N2R0	MCM6	0	0.377901	retained
228	MYNN	BTB	Q9NPC7	MCM6	0	0.330051	retained
229	ZFP82	KRAB-A	Q8N141	MCM6	0	1.02478	retained
230	PATZ1	BTB	Q9HBE1	MCM6	0	0.487428	retained
231	ZNF610	KRAB-A	Q8N9Z0	MCM6	0	0.561313	retained
232	MAZ	NONE	P56270	MCM6	0.72	3.1247	retained
233	ZNF280A	NONE	P59817	MCM6	0.01	1.74537	retained
234	GTF3A	NONE	Q92664	MCM6	0.89	2.56355	retained
235	ZNF547	KRAB-A	Q8IVP9	MCM6	0	0.447854	retained
236	PRDM1	SET	O75626	MCM6	0	1.15728	retained
237	ZNF419	KRAB-A	Q96HQ0	MCM6	0.01	1.14881	retained
238	ZNF667	KRAB-A	Q5HYK9	MCM6	0	0.796105	retained
239	ZNF770	NONE	Q6IQ21	MCM6	0	0.71731	retained
240	ZSCAN30	SCAN	Q86W11	MCM6	0.84	2.02389	retained
241	ZNF140	KRAB-A	P52738	ZNF234	0	1.1795	retained
242	ZFP28	KRAB-A	Q8NHY6	ZNF234	0.45	1.6312	retained
243	ZNF214	KRAB-A	Q9UL59	ZNF234	0	1.21724	retained
244	ZNF418	KRAB-A	Q8TF45	ZNF234	0	1.18494	retained
245	ZNF669	KRAB-A	Q96BR6	ZNF234	1	2.47668	retained
246	ZNF547	KRAB-A	Q8IVP9	ZNF234	0	1.10333	retained
247	ZNF778	KRAB-A	Q96MU6	ZNF234	0	1.15254	retained
248	ZNF490	KRAB-A	Q9ULM2	ZNF234	0	1.40287	retained
249	ZNF37A	KRAB-A	P17032	ZNF234	0	1.20758	retained
250	ZNF549	KRAB-A	Q6P9A3	ZNF234	0.45	1.45363	retained
251	ZNF816	KRAB-A	Q0VGE8	ZNF234	0	1.19476	retained
252	ZNF214	KRAB-A	Q9UL59	H1FX	0	0.798273	retained
253	ZNF331	KRAB-A	Q9NQX6	H1FX	0.03	0.618721	retained
254	ZNF250	KRAB-A	P15622	H1FX	0.06	0.692384	retained
255	ZNF596	KRAB-A	Q8TC21	H1FX	0.06	0.786038	retained
256	ZNF594	NONE	Q96JF6	H1FX	0.31	1.0063	retained
257	ZNF595	KRAB-A	Q8IYB9	H1FX	0.15	1.22417	retained
258	ZNF16	NONE	P17020	H1FX	0.15	1.08748	retained
259	ZNF71	NONE	Q9NQZ8	H1FX	0.28	0.905513	retained
260	ZNF816	KRAB-A	Q0VGE8	H1FX	0.03	0.972966	retained
261	IKZF3	NONE	Q9UKT9	H1FX	0.03	0.443066	retained
262	ZNF140	KRAB-A	P52738	H1FX	0.03	0.883456	retained
263	ZNF708	KRAB-A	P17019	H1FX	0	0.422	retained
264	FEZF1	NONE	A0PJY2	H1FX	0.1	0.837099	retained
265	ZBTB14	BTB	O43829	H1FX	0.35	1.41608	retained
266	ZNF18	KRAB-A;SCAN	P17022	H1FX	0	0.640566	retained
267	ZNF547	KRAB-A	Q8IVP9	H1FX	0.03	0.590073	retained
268	ZNF8	KRAB-A	P17098	H1FX	0.03	0.79445	retained
269	ZNF436	KRAB-A	Q9C0F3	H1FX	0.31	0.9189	retained
270	ZNF768	NONE	Q9H5H4	H1FX	0.15	0.849876	retained
271	KLF1	NONE	Q13351	H1FX	0.17	0.707454	retained
272	ZNF418	KRAB-A	Q8TF45	H1FX	0.06	1.04989	retained
273	ZNF513	NONE	Q8N8E2	H1FX	0.07	0.893617	retained
274	ZNF667	KRAB-A	Q5HYK9	H1FX	0.1	0.875407	retained
275	ZNF184	KRAB-A	Q99676	H1FX	0	0.867412	retained
276	ZFP28	KRAB-A	Q8NHY6	H1FX	0	0.617145	retained
277	ZNF320	KRAB-A	A2RRD8	H1FX	0.21	0.996379	retained
278	ZNF322	NONE	Q6U7Q0	H1FX	0.65	1.682	retained
279	ZNF329	NONE	Q86UD4	H1FX	0.47	1.73132	retained
280	ZNF189	KRAB-A	O75820	H1FX	0.21	0.932298	retained
281	ZNF582	KRAB-A	Q96NG8	H1FX	0.03	0.795319	retained
282	MYNN	BTB	Q9NPC7	H1FX	0.1	0.898082	retained
283	ZFP82	KRAB-A	Q8N141	H1FX	0.07	0.588043	retained
284	PATZ1	BTB	Q9HBE1	H1FX	0.1	0.823432	retained
285	ZNF610	KRAB-A	Q8N9Z0	H1FX	0.03	0.774154	retained
286	ZNF394	KRAB-A;SCAN	Q53GI3	H1FX	0	0.818981	retained
287	MAZ	NONE	P56270	H1FX	0.35	1.17551	retained
288	ZNF449	SCAN	Q6P9G9	H1FX	0.21	1.1281	retained
289	ZBTB42	BTB	B2RXF5	H1FX	0.28	1.26697	retained
290	PRDM1	SET	O75626	H1FX	0.61	1.72179	retained
291	ZNF778	KRAB-A	Q96MU6	H1FX	0.21	1.20693	retained
292	ZNF419	KRAB-A	Q96HQ0	H1FX	0	0.503494	retained
293	ZNF549	KRAB-A	Q6P9A3	H1FX	0.03	1.0003	retained
294	ZNF770	NONE	Q6IQ21	H1FX	0.42	1.36089	retained
295	ZSCAN30	SCAN	Q86W11	H1FX	0.17	0.816227	retained
296	MZF1	SCAN	P28698	ZMYM4	1	18.3648	non_nuclear
297	ZNF189	KRAB-A	O75820	ZMYM4	1	13.0197	non_nuclear
298	ZNF449	SCAN	Q6P9G9	ZMYM4	0	1.18851	non_nuclear
299	ZNF778	KRAB-A	Q96MU6	ZMYM4	0.18	1.45092	non_nuclear
300	ZNF490	KRAB-A	Q9ULM2	ZMYM4	0.66	2.47378	non_nuclear
301	ZNF549	KRAB-A	Q6P9A3	ZMYM4	0	1.22628	non_nuclear
302	ZSCAN5C	SCAN	A6NGD5	ZMYM4	1	43.1118	non_nuclear
303	ZNF18	KRAB-A;SCAN	P17022	ZNF446	1	3.95265	retained
304	ZNF778	KRAB-A	Q96MU6	ZNF446	0	1.26329	retained
305	MZF1	SCAN	P28698	ZNF446	0.82	2.06968	retained
306	ZSCAN30	SCAN	Q86W11	ZNF446	1	5.80799	retained
307	MAZ	NONE	P56270	RBM42	0.48	1.67993	retained
308	ZNF394	KRAB-A;SCAN	Q53GI3	RBM42	0	1.24226	retained
309	KLF1	NONE	Q13351	RBM42	0	1.1455	retained
310	ZNF594	NONE	Q96JF6	RBM42	0.48	1.66613	retained
311	ZNF322	NONE	Q6U7Q0	RBM42	0	1.43356	retained
312	ZNF8	KRAB-A	P17098	SH3KBP1	0	1.20379	retained
313	ZNF257	KRAB-A	Q9Y2Q1	SH3KBP1	0	1.23818	retained
314	ZNF669	KRAB-A	Q96BR6	SH3KBP1	0	1.21418	retained
315	ZNF34	KRAB-A	Q8IZ26	SH3KBP1	0	1.18327	retained
316	ZNF582	KRAB-A	Q96NG8	SH3KBP1	0.18	1.45967	retained
317	ZNF280A	NONE	P59817	SH3KBP1	0	1.17784	retained
318	ZNF419	KRAB-A	Q96HQ0	SH3KBP1	0	1.13352	retained
319	ZNF16	NONE	P17020	MRPS26	1	4.30709	non_nuclear
320	ZNF667	KRAB-A	Q5HYK9	MRPS26	0	1.45879	non_nuclear
321	ZNF189	KRAB-A	O75820	MRPS26	0	1.18786	non_nuclear
322	ZNF418	KRAB-A	Q8TF45	MRPS26	0.91	2.01401	non_nuclear
323	ZNF250	KRAB-A	P15622	NOL6	0.49	1.68232	frequent_flier
324	ZNF692	NONE	Q9BU19	NOL6	0.36	1.45885	frequent_flier
325	ZNF34	KRAB-A	Q8IZ26	NOL6	0.47	1.69151	frequent_flier
326	SCRT1	SNAG	Q9BWW7	NOL6	0.74	2.01073	frequent_flier
327	ZNF667	KRAB-A	Q5HYK9	NOL6	0	0.73098	frequent_flier
328	ZNF594	NONE	Q96JF6	NOL6	0.49	1.49148	frequent_flier
329	ZNF490	KRAB-A	Q9ULM2	NOL6	0	0.801567	frequent_flier
330	ZNF16	NONE	P17020	NOL6	0.49	1.28603	frequent_flier
331	ZNF71	NONE	Q9NQZ8	NOL6	0.9	1.64047	frequent_flier
332	ZSCAN5C	SCAN	A6NGD5	NOL6	0.49	1.4965	frequent_flier
333	ZNF708	KRAB-A	P17019	NOL6	0.99	2.54072	frequent_flier
334	FEZF1	NONE	A0PJY2	NOL6	0.98	2.8176	frequent_flier
335	MZF1	SCAN	P28698	NOL6	0.36	1.18152	frequent_flier
336	KLF1	NONE	Q13351	NOL6	0.24	0.705217	frequent_flier
337	ZNF18	KRAB-A;SCAN	P17022	NOL6	0	0.887818	frequent_flier
338	KLF7	NONE	O75840	NOL6	0.24	0.781557	frequent_flier
339	ZNF669	KRAB-A	Q96BR6	NOL6	0	0.945425	frequent_flier
340	ZNF436	KRAB-A	Q9C0F3	NOL6	0.5	1.78861	frequent_flier
341	ZNF768	NONE	Q9H5H4	NOL6	1	3.90997	frequent_flier
342	ZNF419	KRAB-A	Q96HQ0	NOL6	0.36	0.951631	frequent_flier
343	ZNF513	NONE	Q8N8E2	NOL6	0	1.06263	frequent_flier
344	ZIM3	KRAB-A	Q96PE6	NOL6	0.24	1.20971	frequent_flier
345	ZNF184	KRAB-A	Q99676	NOL6	0	1.14942	frequent_flier
346	GLIS1	NONE	Q8NBF1	NOL6	0	0.740064	frequent_flier
347	ZNF320	KRAB-A	A2RRD8	NOL6	0.49	1.52856	frequent_flier
348	ZNF189	KRAB-A	O75820	NOL6	0	0.661756	frequent_flier
349	ZNF329	NONE	Q86UD4	NOL6	0.49	1.67248	frequent_flier
350	OSR2	NONE	Q8N2R0	NOL6	0.93	2.32167	frequent_flier
351	ZFP82	KRAB-A	Q8N141	NOL6	0.97	2.6425	frequent_flier
352	PATZ1	BTB	Q9HBE1	NOL6	0.47	1.44563	frequent_flier
353	ZNF610	KRAB-A	Q8N9Z0	NOL6	0	1.07432	frequent_flier
354	MAZ	NONE	P56270	NOL6	0.61	1.2771	frequent_flier
355	ZNF449	SCAN	Q6P9G9	NOL6	0.24	0.914564	frequent_flier
356	GTF3A	NONE	Q92664	NOL6	0.92	2.00738	frequent_flier
357	ZBTB42	BTB	B2RXF5	NOL6	0	0.767863	frequent_flier
358	PRDM1	SET	O75626	NOL6	0.93	2.23248	frequent_flier
359	ZNF778	KRAB-A	Q96MU6	NOL6	0	0.788643	frequent_flier
360	ZNF596	KRAB-A	Q8TC21	NOL6	0	0.73807	frequent_flier
361	ZNF37A	KRAB-A	P17032	NOL6	0	0.970204	frequent_flier
362	ZNF563	KRAB-A	Q8TA94	NOL6	0.92	2.08396	frequent_flier
363	ZSCAN30	SCAN	Q86W11	NOL6	0.49	1.05691	frequent_flier
364	SCRT1	SNAG	Q9BWW7	TRIO	0.91	5.04859	non_nuclear
365	ZNF594	NONE	Q96JF6	TRIO	0.5	2.69848	non_nuclear
366	ZNF490	KRAB-A	Q9ULM2	TRIO	0.91	2.50839	non_nuclear
367	ZNF513	NONE	Q8N8E2	TRIO	0.48	1.75023	non_nuclear
368	ZNF37A	KRAB-A	P17032	TRIO	0	1.24098	non_nuclear
369	ZNF667	KRAB-A	Q5HYK9	TRIO	0.82	1.96995	non_nuclear
370	ZNF708	KRAB-A	P17019	GTF3C1	0	1.06643	non_nuclear
371	FEZF1	NONE	A0PJY2	GTF3C1	0.45	1.31425	non_nuclear
372	ZNF250	KRAB-A	P15622	GTF3C1	0.45	1.29362	non_nuclear
373	ZNF490	KRAB-A	Q9ULM2	GTF3C1	0	1.12709	non_nuclear
374	GTF3A	NONE	Q92664	GTF3C1	1	29.8155	non_nuclear
375	ZNF436	KRAB-A	Q9C0F3	GTF3C1	0.45	1.25035	non_nuclear
376	ZNF768	NONE	Q9H5H4	GTF3C1	1	2.18654	non_nuclear
377	ZNF419	KRAB-A	Q96HQ0	GTF3C1	0	1.28797	non_nuclear
378	ZFP82	KRAB-A	Q8N141	GTF3C1	1	4.44042	non_nuclear
379	ZNF667	KRAB-A	Q5HYK9	GTF3C1	0	1.09488	non_nuclear
380	ZNF71	NONE	Q9NQZ8	GTF3C1	0.45	1.24548	non_nuclear
381	ZNF549	KRAB-A	Q6P9A3	GTF3C1	0	1.17923	non_nuclear
382	ZNF320	KRAB-A	A2RRD8	GTF3C1	0	1.09983	non_nuclear
383	ZNF16	NONE	P17020	MRPS33	0	1.26322	retained
384	ZNF490	KRAB-A	Q9ULM2	FBL	0	0.160399	frequent_flier
385	ZNF331	KRAB-A	Q9NQX6	FBL	0.07	0.950082	frequent_flier
386	ZNF250	KRAB-A	P15622	FBL	0	0.348427	frequent_flier
387	GLIS1	NONE	Q8NBF1	FBL	0	0.447136	frequent_flier
388	ZNF257	KRAB-A	Q9Y2Q1	FBL	0	0.802801	frequent_flier
389	ZSCAN5C	SCAN	A6NGD5	FBL	0	0.262907	frequent_flier
390	ZFP28	KRAB-A	Q8NHY6	FBL	0	0.299221	frequent_flier
391	SCRT1	SNAG	Q9BWW7	FBL	0.06	0.857585	frequent_flier
392	ZNF594	NONE	Q96JF6	FBL	0.02	0.57362	frequent_flier
393	ZNF595	KRAB-A	Q8IYB9	FBL	0	0.301019	frequent_flier
394	ZNF16	NONE	P17020	FBL	0	0.217963	frequent_flier
395	ZNF71	NONE	Q9NQZ8	FBL	0.01	0.51827	frequent_flier
396	IKZF3	NONE	Q9UKT9	FBL	0	0.228273	frequent_flier
397	ZNF140	KRAB-A	P52738	FBL	0	0.281184	frequent_flier
398	ZNF708	KRAB-A	P17019	FBL	0	0.58364	frequent_flier
399	FEZF1	NONE	A0PJY2	FBL	0.61	0.981297	frequent_flier
400	MZF1	SCAN	P28698	FBL	0	0.544127	frequent_flier
401	ZBTB14	BTB	O43829	FBL	0.46	1.11893	frequent_flier
402	ZNF18	KRAB-A;SCAN	P17022	FBL	0	0.252627	frequent_flier
403	ZBTB42	BTB	B2RXF5	FBL	0	0.207011	frequent_flier
404	ZNF8	KRAB-A	P17098	FBL	0	0.584567	frequent_flier
405	ZFP3	NONE	Q96NJ6	FBL	0	0.488526	frequent_flier
406	KLF7	NONE	O75840	FBL	0	0.296178	frequent_flier
407	ZNF669	KRAB-A	Q96BR6	FBL	0	0.357412	frequent_flier
408	ZNF436	KRAB-A	Q9C0F3	FBL	0.5	0.646966	frequent_flier
409	ZNF768	NONE	Q9H5H4	FBL	0.81	0.954025	frequent_flier
410	ZNF419	KRAB-A	Q96HQ0	FBL	0	0.501681	frequent_flier
411	ZNF418	KRAB-A	Q8TF45	FBL	0	0.253083	frequent_flier
412	ZNF513	NONE	Q8N8E2	FBL	0	0.243841	frequent_flier
413	ZNF667	KRAB-A	Q5HYK9	FBL	0	0.213712	frequent_flier
414	ZNF324	KRAB-A	O75467	FBL	0	1.5935	frequent_flier
415	ZNF692	NONE	Q9BU19	FBL	0	0.681266	frequent_flier
416	ZNF320	KRAB-A	A2RRD8	FBL	0	0.477261	frequent_flier
417	ZNF322	NONE	Q6U7Q0	FBL	0	0.376371	frequent_flier
418	ZNF189	KRAB-A	O75820	FBL	0	0.175003	frequent_flier
419	ZNF34	KRAB-A	Q8IZ26	FBL	0	0.24161	frequent_flier
420	ZNF329	NONE	Q86UD4	FBL	0	0.515411	frequent_flier
421	OSR2	NONE	Q8N2R0	FBL	0.07	0.682089	frequent_flier
422	ZIM3	KRAB-A	Q96PE6	FBL	0	0.427949	frequent_flier
423	ZNF582	KRAB-A	Q96NG8	FBL	0	0.862188	frequent_flier
424	MYNN	BTB	Q9NPC7	FBL	0	0.566912	frequent_flier
425	ZFP82	KRAB-A	Q8N141	FBL	0.01	0.589137	frequent_flier
426	PATZ1	BTB	Q9HBE1	FBL	0.33	0.882657	frequent_flier
427	ZNF549	KRAB-A	Q6P9A3	FBL	0	0.296414	frequent_flier
428	KLF1	NONE	Q13351	FBL	0	0.318236	frequent_flier
429	ZNF610	KRAB-A	Q8N9Z0	FBL	0	0.207246	frequent_flier
430	ZNF502	NONE	Q8TBZ5	FBL	0	0.535858	frequent_flier
431	ZNF394	KRAB-A;SCAN	Q53GI3	FBL	0	0.679326	frequent_flier
432	MAZ	NONE	P56270	FBL	0.32	0.757413	frequent_flier
433	ZNF449	SCAN	Q6P9G9	FBL	0	0.555043	frequent_flier
434	ZNF280A	NONE	P59817	FBL	0	0.432373	frequent_flier
435	GTF3A	NONE	Q92664	FBL	0	0.607591	frequent_flier
436	ZNF547	KRAB-A	Q8IVP9	FBL	0	0.361656	frequent_flier
437	PRDM1	SET	O75626	FBL	0.06	0.785588	frequent_flier
438	ZNF778	KRAB-A	Q96MU6	FBL	0	0.22	frequent_flier
439	ZNF596	KRAB-A	Q8TC21	FBL	0	0.274748	frequent_flier
440	ZNF37A	KRAB-A	P17032	FBL	0	0.736191	frequent_flier
441	ZNF563	KRAB-A	Q8TA94	FBL	0.61	1.00037	frequent_flier
442	ZNF770	NONE	Q6IQ21	FBL	0	0.237157	frequent_flier
443	ZSCAN30	SCAN	Q86W11	FBL	0.07	0.665248	frequent_flier
444	GTF3A	NONE	Q92664	CTBP2	0.12	1.5001	retained
445	ZFP28	KRAB-A	Q8NHY6	CTBP2	0	0.976719	retained
446	ZNF331	KRAB-A	Q9NQX6	CTBP2	0	0.977678	retained
447	ZNF250	KRAB-A	P15622	CTBP2	0	0.905675	retained
448	MAZ	NONE	P56270	CTBP2	0.3	1.89109	retained
449	ZNF189	KRAB-A	O75820	CTBP2	0.06	1.27308	retained
450	ZBTB42	BTB	B2RXF5	CTBP2	1	9.27869	retained
451	ZNF280A	NONE	P59817	CTBP2	0	1.00126	retained
452	KLF7	NONE	O75840	CTBP2	0.06	1.25248	retained
453	ZNF547	KRAB-A	Q8IVP9	CTBP2	0.19	1.66011	retained
454	PRDM1	SET	O75626	CTBP2	0.35	1.73189	retained
455	KLF1	NONE	Q13351	CTBP2	0.06	0.998221	retained
456	ZFP82	KRAB-A	Q8N141	CTBP2	0.3	1.84798	retained
457	PATZ1	BTB	Q9HBE1	CTBP2	0	0.925592	retained
458	ZNF667	KRAB-A	Q5HYK9	CTBP2	0	0.94911	retained
459	ZNF816	KRAB-A	Q0VGE8	CTBP2	0	1.0829	retained
460	IKZF3	NONE	Q9UKT9	CTBP2	0	1.02854	retained
461	ZNF768	NONE	Q9H5H4	CTBP2	0	0.895631	retained
462	ZNF331	KRAB-A	Q9NQX6	USP7	0.5	1.92577	retained
463	ZNF250	KRAB-A	P15622	USP7	0	0.759236	retained
464	ZNF692	NONE	Q9BU19	USP7	0.5	2.439	retained
465	ZNF34	KRAB-A	Q8IZ26	USP7	0	0.894136	retained
466	ZNF594	NONE	Q96JF6	USP7	0	0.896138	retained
467	ZNF490	KRAB-A	Q9ULM2	USP7	0.1	1.24961	retained
468	ZNF16	NONE	P17020	USP7	0.1	1.04535	retained
469	ZNF71	NONE	Q9NQZ8	USP7	0.1	0.985844	retained
470	IKZF3	NONE	Q9UKT9	USP7	0.1	0.98814	retained
471	ZNF708	KRAB-A	P17019	USP7	0.78	2.20791	retained
472	FEZF1	NONE	A0PJY2	USP7	0.78	2.30169	retained
473	MZF1	SCAN	P28698	USP7	0.5	2.05221	retained
474	KLF7	NONE	O75840	USP7	0	0.728285	retained
475	ZNF436	KRAB-A	Q9C0F3	USP7	0.31	1.14344	retained
476	ZNF768	NONE	Q9H5H4	USP7	0.99	3.92307	retained
477	KLF1	NONE	Q13351	USP7	0.47	1.65593	retained
478	ZSCAN5C	SCAN	A6NGD5	USP7	0	0.898741	retained
479	ZNF513	NONE	Q8N8E2	USP7	0.2	1.34609	retained
480	ZIM3	KRAB-A	Q96PE6	USP7	0.59	2.61191	retained
481	GLIS1	NONE	Q8NBF1	USP7	0.94	3.60634	retained
482	ZNF320	KRAB-A	A2RRD8	USP7	0.2	1.34418	retained
483	OSR2	NONE	Q8N2R0	USP7	0.2	1.20765	retained
484	ZFP82	KRAB-A	Q8N141	USP7	0.31	1.38376	retained
485	PATZ1	BTB	Q9HBE1	USP7	0.1	0.949152	retained
486	MAZ	NONE	P56270	USP7	0.2	1.10097	retained
487	GTF3A	NONE	Q92664	USP7	0	0.771699	retained
488	ZNF547	KRAB-A	Q8IVP9	USP7	0.41	1.54591	retained
489	ZNF419	KRAB-A	Q96HQ0	USP7	0	0.750939	retained
490	ZNF563	KRAB-A	Q8TA94	USP7	0.2	1.30461	retained
491	ZNF331	KRAB-A	Q9NQX6	USP9X	0.94	4.36628	frequent_flier
492	ZNF250	KRAB-A	P15622	USP9X	1	8.26228	frequent_flier
493	ZNF692	NONE	Q9BU19	USP9X	0.85	5.25859	frequent_flier
494	ZNF595	KRAB-A	Q8IYB9	USP9X	0.46	2.31012	frequent_flier
495	ZNF34	KRAB-A	Q8IZ26	USP9X	0.21	1.411	frequent_flier
496	ZNF596	KRAB-A	Q8TC21	USP9X	0.69	2.4085	frequent_flier
497	ZNF667	KRAB-A	Q5HYK9	USP9X	0.15	1.08053	frequent_flier
498	ZNF594	NONE	Q96JF6	USP9X	0.92	4.28655	frequent_flier
499	ZNF490	KRAB-A	Q9ULM2	USP9X	1	6.16811	frequent_flier
500	ZNF16	NONE	P17020	USP9X	0.94	4.62353	frequent_flier
501	ZNF71	NONE	Q9NQZ8	USP9X	0.96	3.42003	frequent_flier
502	ZNF816	KRAB-A	Q0VGE8	USP9X	0.25	1.5934	frequent_flier
503	ZSCAN5C	SCAN	A6NGD5	USP9X	0.25	1.1581	frequent_flier
504	ZNF140	KRAB-A	P52738	USP9X	0.26	1.80562	frequent_flier
505	ZNF708	KRAB-A	P17019	USP9X	1	4.96963	frequent_flier
506	FEZF1	NONE	A0PJY2	USP9X	1	5.8747	frequent_flier
507	MZF1	SCAN	P28698	USP9X	0.99	5.95918	frequent_flier
508	KLF1	NONE	Q13351	USP9X	0.4	1.10301	frequent_flier
509	ZNF18	KRAB-A;SCAN	P17022	USP9X	0.06	1.36099	frequent_flier
510	ZBTB42	BTB	B2RXF5	USP9X	0.17	1.26719	frequent_flier
511	ZNF8	KRAB-A	P17098	USP9X	0.54	2.69656	frequent_flier
512	ZFP3	NONE	Q96NJ6	USP9X	0.02	1.01009	frequent_flier
513	KLF7	NONE	O75840	USP9X	0.9	2.57598	frequent_flier
514	ZNF669	KRAB-A	Q96BR6	USP9X	0.49	2.94778	frequent_flier
515	ZNF436	KRAB-A	Q9C0F3	USP9X	0.92	2.75957	frequent_flier
516	ZNF768	NONE	Q9H5H4	USP9X	1	12.4362	frequent_flier
517	ZNF419	KRAB-A	Q96HQ0	USP9X	1	15.0305	frequent_flier
518	ZNF418	KRAB-A	Q8TF45	USP9X	0.99	9.25198	frequent_flier
519	ZNF513	NONE	Q8N8E2	USP9X	1	13.8821	frequent_flier
520	ZIM3	KRAB-A	Q96PE6	USP9X	0.47	3.42205	frequent_flier
521	ZNF184	KRAB-A	Q99676	USP9X	0	0.673586	frequent_flier
522	ZFP28	KRAB-A	Q8NHY6	USP9X	0.87	3.85643	frequent_flier
523	GLIS1	NONE	Q8NBF1	USP9X	0.15	1.1015	frequent_flier
524	ZNF320	KRAB-A	A2RRD8	USP9X	1	6.95225	frequent_flier
525	ZNF189	KRAB-A	O75820	USP9X	0.91	2.83568	frequent_flier
526	ZNF329	NONE	Q86UD4	USP9X	0.98	6.61555	frequent_flier
527	OSR2	NONE	Q8N2R0	USP9X	0.62	1.77301	frequent_flier
528	ZNF582	KRAB-A	Q96NG8	USP9X	0.05	1.26561	frequent_flier
529	MYNN	BTB	Q9NPC7	USP9X	0.01	0.730711	frequent_flier
530	ZFP82	KRAB-A	Q8N141	USP9X	1	7.49504	frequent_flier
531	PATZ1	BTB	Q9HBE1	USP9X	0.74	2.22533	frequent_flier
532	ZNF610	KRAB-A	Q8N9Z0	USP9X	0.4	2.24305	frequent_flier
533	ZNF502	NONE	Q8TBZ5	USP9X	0	0.829437	frequent_flier
534	ZNF549	KRAB-A	Q6P9A3	USP9X	0.14	1.78168	frequent_flier
535	MAZ	NONE	P56270	USP9X	0.42	1.41336	frequent_flier
536	ZNF449	SCAN	Q6P9G9	USP9X	0.02	0.844168	frequent_flier
537	ZNF280A	NONE	P59817	USP9X	0.03	1.03662	frequent_flier
538	GTF3A	NONE	Q92664	USP9X	0.81	2.59177	frequent_flier
539	ZNF547	KRAB-A	Q8IVP9	USP9X	0.89	2.86629	frequent_flier
540	PRDM1	SET	O75626	USP9X	0.02	0.597801	frequent_flier
541	ZNF778	KRAB-A	Q96MU6	USP9X	0.05	1.0105	frequent_flier
542	SCRT1	SNAG	Q9BWW7	USP9X	0.35	1.58799	frequent_flier
543	ZNF37A	KRAB-A	P17032	USP9X	0.58	3.24328	frequent_flier
544	ZNF563	KRAB-A	Q8TA94	USP9X	1	12.0342	frequent_flier
545	ZNF770	NONE	Q6IQ21	USP9X	0.53	2.06837	frequent_flier
546	ZSCAN30	SCAN	Q86W11	USP9X	0	0.360507	frequent_flier
547	ZNF563	KRAB-A	Q8TA94	ANKRD28	0	1.23777	retained
548	ZNF490	KRAB-A	Q9ULM2	ANKRD28	0	1.24546	retained
549	ZNF669	KRAB-A	Q96BR6	Q3KSP4	0.5	2.02107	non_nuclear
550	ZNF329	NONE	Q86UD4	Q3KSP4	0.48	1.72771	non_nuclear
551	OSR2	NONE	Q8N2R0	Q3KSP4	0.5	1.92769	non_nuclear
552	ZNF490	KRAB-A	Q9ULM2	Q3KSP4	0.41	1.46798	non_nuclear
553	ZNF708	KRAB-A	P17019	KPNA3	1	4.52005	retained
554	FEZF1	NONE	A0PJY2	KPNA3	0.98	2.95936	retained
555	ZNF320	KRAB-A	A2RRD8	KPNA3	0.48	1.81943	retained
556	ZNF331	KRAB-A	Q9NQX6	KPNA3	1	3.748	retained
557	ZNF250	KRAB-A	P15622	KPNA3	0	1.08024	retained
558	ZNF595	KRAB-A	Q8IYB9	KPNA3	0.41	1.39979	retained
559	GTF3A	NONE	Q92664	KPNA3	0	1.08675	retained
560	ZNF669	KRAB-A	Q96BR6	KPNA3	0.41	1.44059	retained
561	ZNF547	KRAB-A	Q8IVP9	KPNA3	0.91	2.21707	retained
562	ZNF436	KRAB-A	Q9C0F3	KPNA3	0	1.0464	retained
563	SCRT1	SNAG	Q9BWW7	KPNA3	0	1.11289	retained
564	ZNF768	NONE	Q9H5H4	KPNA3	0.98	2.44276	retained
565	ZNF419	KRAB-A	Q96HQ0	KPNA3	1	3.13256	retained
566	ZFP82	KRAB-A	Q8N141	KPNA3	1	3.12814	retained
567	ZNF667	KRAB-A	Q5HYK9	KPNA3	0	1.1066	retained
568	ZNF71	NONE	Q9NQZ8	KPNA3	0.48	1.48551	retained
569	ZNF816	KRAB-A	Q0VGE8	KPNA3	0	1.18082	retained
570	ZSCAN5C	SCAN	A6NGD5	KPNA3	0	1.07061	retained
571	ZIM3	KRAB-A	Q96PE6	KPNA3	1	3.50599	retained
572	GTF3A	NONE	Q92664	C19orf47	0.41	1.4199	retained
573	ZNF34	KRAB-A	Q8IZ26	C19orf47	0.41	1.45946	retained
574	SCRT1	SNAG	Q9BWW7	C19orf47	1	3.70573	retained
575	ZNF16	NONE	P17020	C19orf47	0.41	1.70408	retained
576	ZNF594	NONE	Q96JF6	C19orf47	0	1.161	retained
577	GTF3A	NONE	Q92664	ESYT1	0.97	3.17491	non_nuclear
578	ZNF708	KRAB-A	P17019	ESYT1	1	5.45947	non_nuclear
579	GLIS1	NONE	Q8NBF1	ESYT1	0	0.845925	non_nuclear
580	FEZF1	NONE	A0PJY2	ESYT1	1	5.15757	non_nuclear
581	KLF1	NONE	Q13351	ESYT1	0.03	0.98966	non_nuclear
582	ZNF250	KRAB-A	P15622	ESYT1	0	0.786741	non_nuclear
583	MAZ	NONE	P56270	ESYT1	0.26	1.47961	non_nuclear
584	ZNF667	KRAB-A	Q5HYK9	ESYT1	0	0.837596	non_nuclear
585	OSR2	NONE	Q8N2R0	ESYT1	0.1	1.25332	non_nuclear
586	KLF7	NONE	O75840	ESYT1	0.59	2.52357	non_nuclear
587	ZSCAN5C	SCAN	A6NGD5	ESYT1	0	0.769113	non_nuclear
588	ZNF436	KRAB-A	Q9C0F3	ESYT1	0.01	0.881221	non_nuclear
589	SCRT1	SNAG	Q9BWW7	ESYT1	0.05	1.75347	non_nuclear
590	ZNF768	NONE	Q9H5H4	ESYT1	1	5.05659	non_nuclear
591	ZNF594	NONE	Q96JF6	ESYT1	0.28	1.90748	non_nuclear
592	ZNF490	KRAB-A	Q9ULM2	ESYT1	0.01	1.28414	non_nuclear
593	PATZ1	BTB	Q9HBE1	ESYT1	0.03	1.15392	non_nuclear
594	ZNF71	NONE	Q9NQZ8	ESYT1	0.36	1.94463	non_nuclear
595	ZNF394	KRAB-A;SCAN	Q53GI3	ESYT1	0	1.08641	non_nuclear
596	IKZF3	NONE	Q9UKT9	ESYT1	0	0.722002	non_nuclear
597	ZSCAN30	SCAN	Q86W11	ESYT1	0.91	3.81327	non_nuclear
598	ZNF214	KRAB-A	Q9UL59	MKI67	0	0.947114	frequent_flier
599	IKZF3	NONE	Q9UKT9	MKI67	0	0.128579	frequent_flier
600	ZNF490	KRAB-A	Q9ULM2	MKI67	0	0.729841	frequent_flier
601	ZNF331	KRAB-A	Q9NQX6	MKI67	0	0.628533	frequent_flier
602	ZNF250	KRAB-A	P15622	MKI67	0.07	0.729125	frequent_flier
603	GLIS1	NONE	Q8NBF1	MKI67	0.73	1.85475	frequent_flier
604	ZNF257	KRAB-A	Q9Y2Q1	MKI67	0	0.800576	frequent_flier
605	ZNF34	KRAB-A	Q8IZ26	MKI67	0.11	1.01781	frequent_flier
606	SCRT1	SNAG	Q9BWW7	MKI67	0.97	3.43896	frequent_flier
607	ZNF594	NONE	Q96JF6	MKI67	0.33	0.764537	frequent_flier
608	ZNF595	KRAB-A	Q8IYB9	MKI67	0.25	1.72565	frequent_flier
609	ZNF16	NONE	P17020	MKI67	0	0.54776	frequent_flier
610	ZNF816	KRAB-A	Q0VGE8	MKI67	0.01	1.217	frequent_flier
611	ZSCAN5C	SCAN	A6NGD5	MKI67	0.02	0.691668	frequent_flier
612	ZBTB6	BTB	Q15916	MKI67	0	0.497349	frequent_flier
613	ZNF140	KRAB-A	P52738	MKI67	0	0.702562	frequent_flier
614	ZNF708	KRAB-A	P17019	MKI67	0.96	2.55097	frequent_flier
615	FEZF1	NONE	A0PJY2	MKI67	0.97	3.10565	frequent_flier
616	MZF1	SCAN	P28698	MKI67	0	0.368207	frequent_flier
617	KLF1	NONE	Q13351	MKI67	0.23	0.638224	frequent_flier
618	ZNF18	KRAB-A;SCAN	P17022	MKI67	0.03	1.49619	frequent_flier
619	ZNF547	KRAB-A	Q8IVP9	MKI67	0.07	0.868181	frequent_flier
620	ZNF8	KRAB-A	P17098	MKI67	0	0.350734	frequent_flier
621	ZFP3	NONE	Q96NJ6	MKI67	0	0.689573	frequent_flier
622	KLF7	NONE	O75840	MKI67	0.94	2.95956	frequent_flier
623	ZNF669	KRAB-A	Q96BR6	MKI67	0	0.525059	frequent_flier
624	ZNF436	KRAB-A	Q9C0F3	MKI67	0.4	0.953012	frequent_flier
625	ZNF768	NONE	Q9H5H4	MKI67	0.77	1.60105	frequent_flier
626	ZNF419	KRAB-A	Q96HQ0	MKI67	0.32	1.05789	frequent_flier
627	ZNF418	KRAB-A	Q8TF45	MKI67	0.39	1.65018	frequent_flier
628	ZNF513	NONE	Q8N8E2	MKI67	0	1.15357	frequent_flier
629	ZNF667	KRAB-A	Q5HYK9	MKI67	0.37	1.32934	frequent_flier
630	ZNF184	KRAB-A	Q99676	MKI67	0.01	1.38083	frequent_flier
631	ZFP28	KRAB-A	Q8NHY6	MKI67	0	0.590848	frequent_flier
632	ZNF320	KRAB-A	A2RRD8	MKI67	0.51	2.38621	frequent_flier
633	ZNF322	NONE	Q6U7Q0	MKI67	0	0.34485	frequent_flier
634	ZNF329	NONE	Q86UD4	MKI67	0.41	1.67255	frequent_flier
635	ZNF189	KRAB-A	O75820	MKI67	0.78	1.58938	frequent_flier
636	OSR2	NONE	Q8N2R0	MKI67	0.72	1.93968	frequent_flier
637	MYNN	BTB	Q9NPC7	MKI67	0	0.386888	frequent_flier
638	ZFP82	KRAB-A	Q8N141	MKI67	0.92	2.50233	frequent_flier
639	PATZ1	BTB	Q9HBE1	MKI67	0.23	0.869691	frequent_flier
640	ZNF394	KRAB-A;SCAN	Q53GI3	MKI67	0	0.369055	frequent_flier
641	ZNF610	KRAB-A	Q8N9Z0	MKI67	0.05	1.53847	frequent_flier
642	ZNF502	NONE	Q8TBZ5	MKI67	0	0.855267	frequent_flier
643	ZNF692	NONE	Q9BU19	MKI67	0	0.370065	frequent_flier
644	ZNF563	KRAB-A	Q8TA94	MKI67	0	0.204709	frequent_flier
645	MAZ	NONE	P56270	MKI67	0.33	0.900711	frequent_flier
646	ZNF449	SCAN	Q6P9G9	MKI67	0.79	2.13609	frequent_flier
647	ZNF280A	NONE	P59817	MKI67	0	0.339251	frequent_flier
648	GTF3A	NONE	Q92664	MKI67	0.75	1.8327	frequent_flier
649	ZBTB14	BTB	O43829	MKI67	0.03	0.839179	frequent_flier
650	ZBTB42	BTB	B2RXF5	MKI67	0.74	2.04328	frequent_flier
651	PRDM1	SET	O75626	MKI67	0.92	2.48569	frequent_flier
652	ZNF778	KRAB-A	Q96MU6	MKI67	0.65	1.9058	frequent_flier
653	ZNF596	KRAB-A	Q8TC21	MKI67	0.45	1.6166	frequent_flier
654	ZNF37A	KRAB-A	P17032	MKI67	0.07	1.81137	frequent_flier
655	ZNF549	KRAB-A	Q6P9A3	MKI67	0.33	2.39432	frequent_flier
656	ZNF770	NONE	Q6IQ21	MKI67	0.11	0.961671	frequent_flier
657	ZSCAN30	SCAN	Q86W11	MKI67	0	0.442631	frequent_flier
658	ZNF214	KRAB-A	Q9UL59	NTPCR	0	1.08099	non_nuclear
659	ZNF595	KRAB-A	Q8IYB9	NTPCR	0	0.949916	non_nuclear
660	ZNF34	KRAB-A	Q8IZ26	NTPCR	0.25	1.32071	non_nuclear
661	ZNF18	KRAB-A;SCAN	P17022	NTPCR	0.25	1.19303	non_nuclear
662	ZNF490	KRAB-A	Q9ULM2	NTPCR	0	0.910693	non_nuclear
663	ZNF16	NONE	P17020	NTPCR	0.25	1.08707	non_nuclear
664	ZNF71	NONE	Q9NQZ8	NTPCR	0.98	2.13058	non_nuclear
665	ZNF816	KRAB-A	Q0VGE8	NTPCR	0	1.01248	non_nuclear
666	IKZF3	NONE	Q9UKT9	NTPCR	0.42	1.04483	non_nuclear
667	ZNF140	KRAB-A	P52738	NTPCR	0	0.969431	non_nuclear
668	ZNF708	KRAB-A	P17019	NTPCR	0.74	1.64274	non_nuclear
669	FEZF1	NONE	A0PJY2	NTPCR	0.25	1.17953	non_nuclear
670	MZF1	SCAN	P28698	NTPCR	0	1.13313	non_nuclear
671	ZBTB42	BTB	B2RXF5	NTPCR	0.92	2.19108	non_nuclear
672	ZNF8	KRAB-A	P17098	NTPCR	0.68	1.83882	non_nuclear
673	KLF7	NONE	O75840	NTPCR	0	0.767411	non_nuclear
674	ZNF669	KRAB-A	Q96BR6	NTPCR	0.5	1.68802	non_nuclear
675	ZNF436	KRAB-A	Q9C0F3	NTPCR	0	0.894886	non_nuclear
676	ZSCAN5C	SCAN	A6NGD5	NTPCR	0.42	1.11151	non_nuclear
677	ZNF418	KRAB-A	Q8TF45	NTPCR	0.25	1.40273	non_nuclear
678	ZNF513	NONE	Q8N8E2	NTPCR	0.25	1.18157	non_nuclear
679	ZNF768	NONE	Q9H5H4	NTPCR	0.92	2.12207	non_nuclear
680	ZFP28	KRAB-A	Q8NHY6	NTPCR	0	1.06772	non_nuclear
681	ZNF320	KRAB-A	A2RRD8	NTPCR	0.25	1.0393	non_nuclear
682	ZNF189	KRAB-A	O75820	NTPCR	0	0.783713	non_nuclear
683	OSR2	NONE	Q8N2R0	NTPCR	0.42	1.27135	non_nuclear
684	ZNF582	KRAB-A	Q96NG8	NTPCR	0	0.994617	non_nuclear
685	MYNN	BTB	Q9NPC7	NTPCR	0.25	1.2245	non_nuclear
686	ZFP82	KRAB-A	Q8N141	NTPCR	0.75	1.9566	non_nuclear
687	ZNF610	KRAB-A	Q8N9Z0	NTPCR	0.25	1.19129	non_nuclear
688	ZNF280A	NONE	P59817	NTPCR	0.98	2.65054	non_nuclear
689	GTF3A	NONE	Q92664	NTPCR	0	0.809669	non_nuclear
690	ZNF547	KRAB-A	Q8IVP9	NTPCR	0.25	0.955726	non_nuclear
691	ZNF778	KRAB-A	Q96MU6	NTPCR	0.68	1.66358	non_nuclear
692	ZNF667	KRAB-A	Q5HYK9	NTPCR	0.92	2.10867	non_nuclear
693	ZNF563	KRAB-A	Q8TA94	NTPCR	0	0.833962	non_nuclear
694	ZNF770	NONE	Q6IQ21	NTPCR	0.98	2.27358	non_nuclear
695	ZNF768	NONE	Q9H5H4	TBC1D15	0	1.22326	non_nuclear
696	ZNF214	KRAB-A	Q9UL59	ZNF136	0.48	2.02218	retained
697	ZFP28	KRAB-A	Q8NHY6	ZNF136	0.41	1.4375	retained
698	ZNF140	KRAB-A	P52738	ZNF136	0	1.20958	retained
699	ZNF778	KRAB-A	Q96MU6	ZNF136	0.41	1.444	retained
700	ZNF418	KRAB-A	Q8TF45	ZNF136	1	3.27511	retained
701	ZNF37A	KRAB-A	P17032	ZNF136	0	1.22862	retained
702	ZNF549	KRAB-A	Q6P9A3	ZNF136	0	1.48254	retained
703	ZNF816	KRAB-A	Q0VGE8	ZNF136	0	1.21997	retained
704	ZNF490	KRAB-A	Q9ULM2	HMGA1	0	0.513085	retained
705	ZNF331	KRAB-A	Q9NQX6	HMGA1	0	0.726632	retained
706	ZNF250	KRAB-A	P15622	HMGA1	0	0.721333	retained
707	GLIS1	NONE	Q8NBF1	HMGA1	0	0.836805	retained
708	ZNF419	KRAB-A	Q96HQ0	HMGA1	0	0.31073	retained
709	ZFP28	KRAB-A	Q8NHY6	HMGA1	0	0.391689	retained
710	SCRT1	SNAG	Q9BWW7	HMGA1	0	0.767124	retained
711	ZNF667	KRAB-A	Q5HYK9	HMGA1	0	0.360281	retained
712	ZNF594	NONE	Q96JF6	HMGA1	0	0.750602	retained
713	ZNF595	KRAB-A	Q8IYB9	HMGA1	0	0.668017	retained
714	ZNF16	NONE	P17020	HMGA1	0	0.49476	retained
715	ZNF816	KRAB-A	Q0VGE8	HMGA1	0	0.790325	retained
716	IKZF3	NONE	Q9UKT9	HMGA1	0.4	1.01363	retained
717	ZBTB6	BTB	Q15916	HMGA1	0	1.09863	retained
718	ZNF140	KRAB-A	P52738	HMGA1	0	0.493727	retained
719	ZNF708	KRAB-A	P17019	HMGA1	0	0.585209	retained
720	FEZF1	NONE	A0PJY2	HMGA1	0	0.56058	retained
721	ZBTB14	BTB	O43829	HMGA1	0	0.491749	retained
722	ZNF18	KRAB-A;SCAN	P17022	HMGA1	0	0.622427	retained
723	ZNF547	KRAB-A	Q8IVP9	HMGA1	0	0.572969	retained
724	ZNF8	KRAB-A	P17098	HMGA1	0	0.639672	retained
725	KLF7	NONE	O75840	HMGA1	0	0.543499	retained
726	ZNF436	KRAB-A	Q9C0F3	HMGA1	0	0.330734	retained
727	ZSCAN5C	SCAN	A6NGD5	HMGA1	0	0.561231	retained
728	KLF1	NONE	Q13351	HMGA1	0.4	0.892068	retained
729	ZNF418	KRAB-A	Q8TF45	HMGA1	0	0.514036	retained
730	ZNF513	NONE	Q8N8E2	HMGA1	0	0.500525	retained
731	ZNF768	NONE	Q9H5H4	HMGA1	0	0.373542	retained
732	ZNF692	NONE	Q9BU19	HMGA1	0	0.844742	retained
733	ZNF320	KRAB-A	A2RRD8	HMGA1	0.05	1.23095	retained
734	ZNF322	NONE	Q6U7Q0	HMGA1	1	2.77717	retained
735	ZNF329	NONE	Q86UD4	HMGA1	0	0.707854	retained
736	ZNF189	KRAB-A	O75820	HMGA1	0	0.631433	retained
737	OSR2	NONE	Q8N2R0	HMGA1	0	0.620038	retained
738	ZNF582	KRAB-A	Q96NG8	HMGA1	0	0.864958	retained
739	MYNN	BTB	Q9NPC7	HMGA1	0	0.607384	retained
740	ZFP82	KRAB-A	Q8N141	HMGA1	0	0.570759	retained
741	PATZ1	BTB	Q9HBE1	HMGA1	0.4	1.33546	retained
742	ZNF610	KRAB-A	Q8N9Z0	HMGA1	0	0.511407	retained
743	ZNF502	NONE	Q8TBZ5	HMGA1	0	0.724777	retained
744	ZNF549	KRAB-A	Q6P9A3	HMGA1	0	0.695659	retained
745	MAZ	NONE	P56270	HMGA1	0.27	1.09373	retained
746	ZNF449	SCAN	Q6P9G9	HMGA1	0	0.945397	retained
747	ZNF280A	NONE	P59817	HMGA1	0	0.602341	retained
748	GTF3A	NONE	Q92664	HMGA1	0	0.46591	retained
749	ZBTB42	BTB	B2RXF5	HMGA1	0	0.641923	retained
750	PRDM1	SET	O75626	HMGA1	0.05	1.08361	retained
751	ZNF778	KRAB-A	Q96MU6	HMGA1	0	0.498319	retained
752	ZNF596	KRAB-A	Q8TC21	HMGA1	0	0.444013	retained
753	ZNF37A	KRAB-A	P17032	HMGA1	0	1.27266	retained
754	ZNF394	KRAB-A;SCAN	Q53GI3	HMGA1	0	1.43425	retained
755	ZNF770	NONE	Q6IQ21	HMGA1	0	0.581491	retained
756	ZSCAN30	SCAN	Q86W11	HMGA1	0	0.482146	retained
757	ZNF490	KRAB-A	Q9ULM2	NOL9	0	1.11743	retained
758	ZNF34	KRAB-A	Q8IZ26	NOL9	1	2.79976	retained
759	ZNF596	KRAB-A	Q8TC21	NOL9	0	1.08701	retained
760	ZNF595	KRAB-A	Q8IYB9	NOL9	0	1.13735	retained
761	ZNF16	NONE	P17020	NOL9	0	1.34583	retained
762	ZNF140	KRAB-A	P52738	NOL9	0	1.14691	retained
763	ZNF708	KRAB-A	P17019	NOL9	0.5	1.72478	retained
764	FEZF1	NONE	A0PJY2	NOL9	0.95	1.98272	retained
765	ZNF436	KRAB-A	Q9C0F3	NOL9	0.45	1.23255	retained
766	ZNF768	NONE	Q9H5H4	NOL9	1	3.04883	retained
767	ZNF419	KRAB-A	Q96HQ0	NOL9	0	1.04913	retained
768	ZNF418	KRAB-A	Q8TF45	NOL9	0	1.15412	retained
769	ZNF513	NONE	Q8N8E2	NOL9	0	1.14938	retained
770	ZNF667	KRAB-A	Q5HYK9	NOL9	0	1.0834	retained
771	ZFP28	KRAB-A	Q8NHY6	NOL9	0	1.33547	retained
772	ZNF189	KRAB-A	O75820	NOL9	0.45	1.48978	retained
773	OSR2	NONE	Q8N2R0	NOL9	0.95	1.92575	retained
774	ZFP82	KRAB-A	Q8N141	NOL9	1	2.60492	retained
775	ZBTB42	BTB	B2RXF5	NOL9	0.5	1.56975	retained
776	ZNF778	KRAB-A	Q96MU6	NOL9	0	1.11151	retained
777	ZNF563	KRAB-A	Q8TA94	NOL9	1	2.6746	retained
778	ZNF770	NONE	Q6IQ21	NOL9	0	1.08021	retained
779	ZNF214	KRAB-A	Q9UL59	TP53	0	0.499671	frequent_flier
780	IKZF3	NONE	Q9UKT9	TP53	0	0.206437	frequent_flier
781	ZNF331	KRAB-A	Q9NQX6	TP53	0	0.480955	frequent_flier
782	ZNF250	KRAB-A	P15622	TP53	0.97	2.02359	frequent_flier
783	GLIS1	NONE	Q8NBF1	TP53	0.1	0.599837	frequent_flier
784	ZNF595	KRAB-A	Q8IYB9	TP53	0.02	0.727136	frequent_flier
785	ZNF257	KRAB-A	Q9Y2Q1	TP53	0.01	1.35087	frequent_flier
786	ZNF34	KRAB-A	Q8IZ26	TP53	0.01	0.677219	frequent_flier
787	ZFP28	KRAB-A	Q8NHY6	TP53	0.01	0.479328	frequent_flier
788	ZNF18	KRAB-A;SCAN	P17022	TP53	0.15	1.26474	frequent_flier
789	ZNF594	NONE	Q96JF6	TP53	0.37	0.848943	frequent_flier
790	ZNF490	KRAB-A	Q9ULM2	TP53	0.31	1.1865	frequent_flier
791	ZNF16	NONE	P17020	TP53	0.45	1.31056	frequent_flier
792	ZNF71	NONE	Q9NQZ8	TP53	0.2	0.637621	frequent_flier
793	ZSCAN5C	SCAN	A6NGD5	TP53	0	0.400334	frequent_flier
794	ZNF140	KRAB-A	P52738	TP53	0	0.340023	frequent_flier
795	ZNF708	KRAB-A	P17019	TP53	0.05	0.592303	frequent_flier
796	FEZF1	NONE	A0PJY2	TP53	0.32	0.930619	frequent_flier
797	MZF1	SCAN	P28698	TP53	1	4.38447	frequent_flier
798	KLF1	NONE	Q13351	TP53	0.02	0.358837	frequent_flier
799	ZBTB42	BTB	B2RXF5	TP53	0	0.479869	frequent_flier
800	ZNF8	KRAB-A	P17098	TP53	0.01	0.837831	frequent_flier
801	ZFP3	NONE	Q96NJ6	TP53	0.39	1.4539	frequent_flier
802	KLF7	NONE	O75840	TP53	0	0.187336	frequent_flier
803	ZNF436	KRAB-A	Q9C0F3	TP53	0.86	1.30893	frequent_flier
804	ZNF768	NONE	Q9H5H4	TP53	0.95	1.83343	frequent_flier
805	ZNF419	KRAB-A	Q96HQ0	TP53	0.15	0.707531	frequent_flier
806	ZNF418	KRAB-A	Q8TF45	TP53	0.15	1.03926	frequent_flier
807	ZNF513	NONE	Q8N8E2	TP53	0.05	1.00644	frequent_flier
808	ZNF667	KRAB-A	Q5HYK9	TP53	0.17	0.835838	frequent_flier
809	ZNF184	KRAB-A	Q99676	TP53	0	0.420205	frequent_flier
810	ZNF692	NONE	Q9BU19	TP53	0.97	5.18286	frequent_flier
811	ZNF320	KRAB-A	A2RRD8	TP53	0.05	0.601731	frequent_flier
812	ZNF189	KRAB-A	O75820	TP53	0.1	0.6544	frequent_flier
813	ZNF596	KRAB-A	Q8TC21	TP53	0	0.290904	frequent_flier
814	ZNF329	NONE	Q86UD4	TP53	0.62	1.64858	frequent_flier
815	OSR2	NONE	Q8N2R0	TP53	0.03	0.518793	frequent_flier
816	ZIM3	KRAB-A	Q96PE6	TP53	0.01	0.792258	frequent_flier
817	MYNN	BTB	Q9NPC7	TP53	0	0.398664	frequent_flier
818	ZFP82	KRAB-A	Q8N141	TP53	0.17	0.702051	frequent_flier
819	PATZ1	BTB	Q9HBE1	TP53	0.1	0.726282	frequent_flier
820	ZNF394	KRAB-A;SCAN	Q53GI3	TP53	0	0.521197	frequent_flier
821	ZNF502	NONE	Q8TBZ5	TP53	0.02	1.06846	frequent_flier
822	ZNF549	KRAB-A	Q6P9A3	TP53	0	0.668433	frequent_flier
823	MAZ	NONE	P56270	TP53	0	0.301578	frequent_flier
824	ZNF449	SCAN	Q6P9G9	TP53	0.02	0.463142	frequent_flier
825	ZNF280A	NONE	P59817	TP53	0.23	1.06477	frequent_flier
826	GTF3A	NONE	Q92664	TP53	0.1	0.614602	frequent_flier
827	ZNF547	KRAB-A	Q8IVP9	TP53	0.2	0.747286	frequent_flier
828	PRDM1	SET	O75626	TP53	0	0.369323	frequent_flier
829	ZNF778	KRAB-A	Q96MU6	TP53	0.35	1.2051	frequent_flier
830	SCRT1	SNAG	Q9BWW7	TP53	0.05	0.711262	frequent_flier
831	ZNF37A	KRAB-A	P17032	TP53	0.05	0.922129	frequent_flier
832	ZNF563	KRAB-A	Q8TA94	TP53	0.02	0.562644	frequent_flier
833	ZNF770	NONE	Q6IQ21	TP53	0.1	0.773137	frequent_flier
834	ZSCAN30	SCAN	Q86W11	TP53	0	0.307469	frequent_flier
835	ZNF214	KRAB-A	Q9UL59	HUWE1	0.53	3.22776	retained
836	ZNF331	KRAB-A	Q9NQX6	HUWE1	0.5	2.37011	retained
837	ZNF595	KRAB-A	Q8IYB9	HUWE1	0.26	1.80199	retained
838	ZNF257	KRAB-A	Q9Y2Q1	HUWE1	0.46	3.00393	retained
839	ZNF34	KRAB-A	Q8IZ26	HUWE1	0.6	2.71129	retained
840	ZNF490	KRAB-A	Q9ULM2	HUWE1	0.26	1.69312	retained
841	ZNF16	NONE	P17020	HUWE1	0.53	2.27336	retained
842	ZNF71	NONE	Q9NQZ8	HUWE1	0	0.548186	retained
843	ZNF816	KRAB-A	Q0VGE8	HUWE1	0.1	1.42896	retained
844	ZBTB6	BTB	Q15916	HUWE1	0.49	3.63254	retained
845	ZNF140	KRAB-A	P52738	HUWE1	0.33	2.03134	retained
846	ZNF708	KRAB-A	P17019	HUWE1	0.47	1.92279	retained
847	FEZF1	NONE	A0PJY2	HUWE1	1	6.85585	retained
848	ZBTB42	BTB	B2RXF5	HUWE1	0.99	8.39512	retained
849	KLF7	NONE	O75840	HUWE1	0.9	4.43465	retained
850	ZNF768	NONE	Q9H5H4	HUWE1	0.93	3.17159	retained
851	ZNF419	KRAB-A	Q96HQ0	HUWE1	0.39	1.64084	retained
852	ZNF513	NONE	Q8N8E2	HUWE1	0.16	1.52289	retained
853	ZNF667	KRAB-A	Q5HYK9	HUWE1	1	6.52081	retained
854	ZNF320	KRAB-A	A2RRD8	HUWE1	0.26	1.55149	retained
855	ZNF189	KRAB-A	O75820	HUWE1	0.26	1.36865	retained
856	ZNF582	KRAB-A	Q96NG8	HUWE1	0	0.849238	retained
857	MYNN	BTB	Q9NPC7	HUWE1	0.04	0.830014	retained
858	ZFP82	KRAB-A	Q8N141	HUWE1	1	11.5276	retained
859	ZNF610	KRAB-A	Q8N9Z0	HUWE1	0.79	4.02102	retained
860	ZNF449	SCAN	Q6P9G9	HUWE1	0.8	6.45739	retained
861	GTF3A	NONE	Q92664	HUWE1	0.1	1.0306	retained
862	ZNF547	KRAB-A	Q8IVP9	HUWE1	0.16	1.12194	retained
863	ZNF778	KRAB-A	Q96MU6	HUWE1	0.1	1.19675	retained
864	ZNF563	KRAB-A	Q8TA94	HUWE1	0.26	1.49223	retained
865	ZNF770	NONE	Q6IQ21	HUWE1	0.91	3.35045	retained
866	ZNF547	KRAB-A	Q8IVP9	ZKSCAN8	0	1.26021	retained
867	ZSCAN30	SCAN	Q86W11	ZKSCAN8	0.5	2.32978	retained
868	ZNF449	SCAN	Q6P9G9	ZKSCAN8	0.97	2.60344	retained
869	MZF1	SCAN	P28698	ZKSCAN8	1	3.68081	retained
870	ZFP3	NONE	Q96NJ6	ZKSCAN8	0.91	2.60722	retained
871	ZFP28	KRAB-A	Q8NHY6	CASK	0	1.20404	retained
872	ZNF250	KRAB-A	P15622	CASK	1	19.5312	retained
873	MAZ	NONE	P56270	CASK	0	1.18674	retained
874	ZNF768	NONE	Q9H5H4	CASK	0	1.18009	retained
875	ZNF594	NONE	Q96JF6	CASK	0	1.17781	retained
876	ZNF71	NONE	Q9NQZ8	CASK	0.45	1.41131	retained
877	ZIM3	KRAB-A	Q96PE6	CASK	1	5.19732	retained
878	GTF3A	NONE	Q92664	GTF3C2	1	14.7552	retained
879	PATZ1	BTB	Q9HBE1	C10orf2	1	8.76237	non_nuclear
880	ZNF513	NONE	Q8N8E2	SOGA1	0	1.23733	non_nuclear
881	ZFP82	KRAB-A	Q8N141	SOGA1	0.41	1.71799	non_nuclear
882	ZNF418	KRAB-A	Q8TF45	SOGA1	0	1.2387	non_nuclear
883	ZNF667	KRAB-A	Q5HYK9	SOGA1	0	1.21737	non_nuclear
884	ZNF490	KRAB-A	Q9ULM2	SOGA1	0.9	2.27118	non_nuclear
885	ZNF214	KRAB-A	Q9UL59	PPP2R2A	0	0.446973	non_nuclear
886	IKZF3	NONE	Q9UKT9	PPP2R2A	0	0.269564	non_nuclear
887	ZNF331	KRAB-A	Q9NQX6	PPP2R2A	0.99	1.75602	non_nuclear
888	ZNF250	KRAB-A	P15622	PPP2R2A	0	0.6968	non_nuclear
889	GLIS1	NONE	Q8NBF1	PPP2R2A	0.02	0.916604	non_nuclear
890	ZNF595	KRAB-A	Q8IYB9	PPP2R2A	0	0.6348	non_nuclear
891	ZNF257	KRAB-A	Q9Y2Q1	PPP2R2A	0	0.652553	non_nuclear
892	ZNF34	KRAB-A	Q8IZ26	PPP2R2A	0	0.369279	non_nuclear
893	ZFP28	KRAB-A	Q8NHY6	PPP2R2A	0	0.510441	non_nuclear
894	SCRT1	SNAG	Q9BWW7	PPP2R2A	0.17	1.10806	non_nuclear
895	ZNF594	NONE	Q96JF6	PPP2R2A	1	2.31255	non_nuclear
896	ZNF490	KRAB-A	Q9ULM2	PPP2R2A	1	2.80924	non_nuclear
897	ZNF16	NONE	P17020	PPP2R2A	0	0.636199	non_nuclear
898	ZNF71	NONE	Q9NQZ8	PPP2R2A	0.01	0.607332	non_nuclear
899	ZNF816	KRAB-A	Q0VGE8	PPP2R2A	0	0.565123	non_nuclear
900	ZSCAN5C	SCAN	A6NGD5	PPP2R2A	0.96	1.29974	non_nuclear
901	ZBTB6	BTB	Q15916	PPP2R2A	0	0.633919	non_nuclear
902	ZNF140	KRAB-A	P52738	PPP2R2A	0	0.297653	non_nuclear
903	ZNF708	KRAB-A	P17019	PPP2R2A	0.06	0.843481	non_nuclear
904	FEZF1	NONE	A0PJY2	PPP2R2A	1	1.81938	non_nuclear
905	MZF1	SCAN	P28698	PPP2R2A	0	0.660557	non_nuclear
906	ZBTB14	BTB	O43829	PPP2R2A	0	0.830354	non_nuclear
907	ZNF18	KRAB-A;SCAN	P17022	PPP2R2A	0	0.445466	non_nuclear
908	ZBTB42	BTB	B2RXF5	PPP2R2A	0	0.367859	non_nuclear
909	ZNF8	KRAB-A	P17098	PPP2R2A	0.04	1.4238	non_nuclear
910	ZFP3	NONE	Q96NJ6	PPP2R2A	0.02	1.2101	non_nuclear
911	KLF7	NONE	O75840	PPP2R2A	0	0.50207	non_nuclear
912	ZNF669	KRAB-A	Q96BR6	PPP2R2A	0.13	1.70145	non_nuclear
913	ZNF436	KRAB-A	Q9C0F3	PPP2R2A	0	0.524368	non_nuclear
914	ZNF768	NONE	Q9H5H4	PPP2R2A	0.14	0.854237	non_nuclear
915	KLF1	NONE	Q13351	PPP2R2A	0.02	0.593	non_nuclear
916	ZNF418	KRAB-A	Q8TF45	PPP2R2A	0	0.51271	non_nuclear
917	ZNF513	NONE	Q8N8E2	PPP2R2A	0	0.560091	non_nuclear
918	ZIM3	KRAB-A	Q96PE6	PPP2R2A	0.01	1.62467	non_nuclear
919	ZNF184	KRAB-A	Q99676	PPP2R2A	0	0.450826	non_nuclear
920	ZNF692	NONE	Q9BU19	PPP2R2A	0.76	3.25672	non_nuclear
921	ZNF419	KRAB-A	Q96HQ0	PPP2R2A	0.06	0.826215	non_nuclear
922	ZNF320	KRAB-A	A2RRD8	PPP2R2A	0	0.342284	non_nuclear
923	ZNF322	NONE	Q6U7Q0	PPP2R2A	0	0.38886	non_nuclear
924	ZNF189	KRAB-A	O75820	PPP2R2A	0	0.311559	non_nuclear
925	ZNF329	NONE	Q86UD4	PPP2R2A	1	2.07782	non_nuclear
926	OSR2	NONE	Q8N2R0	PPP2R2A	0	0.375237	non_nuclear
927	ZNF582	KRAB-A	Q96NG8	PPP2R2A	0	0.530849	non_nuclear
928	MYNN	BTB	Q9NPC7	PPP2R2A	0	0.568028	non_nuclear
929	ZFP82	KRAB-A	Q8N141	PPP2R2A	0.13	0.81965	non_nuclear
930	PATZ1	BTB	Q9HBE1	PPP2R2A	0	0.346764	non_nuclear
931	ZNF610	KRAB-A	Q8N9Z0	PPP2R2A	0	0.311127	non_nuclear
932	ZNF502	NONE	Q8TBZ5	PPP2R2A	0	0.461527	non_nuclear
933	ZNF549	KRAB-A	Q6P9A3	PPP2R2A	0	0.513925	non_nuclear
934	MAZ	NONE	P56270	PPP2R2A	0	0.37561	non_nuclear
935	ZNF449	SCAN	Q6P9G9	PPP2R2A	0	0.446626	non_nuclear
936	ZNF280A	NONE	P59817	PPP2R2A	0	0.716078	non_nuclear
937	GTF3A	NONE	Q92664	PPP2R2A	0.73	1.1462	non_nuclear
938	ZNF547	KRAB-A	Q8IVP9	PPP2R2A	0.52	1.00456	non_nuclear
939	PRDM1	SET	O75626	PPP2R2A	1	2.05351	non_nuclear
940	ZNF778	KRAB-A	Q96MU6	PPP2R2A	0	0.338718	non_nuclear
941	ZNF596	KRAB-A	Q8TC21	PPP2R2A	0	0.339335	non_nuclear
942	ZNF667	KRAB-A	Q5HYK9	PPP2R2A	0	0.635202	non_nuclear
943	ZNF563	KRAB-A	Q8TA94	PPP2R2A	0.03	0.89951	non_nuclear
944	ZNF770	NONE	Q6IQ21	PPP2R2A	0	0.36982	non_nuclear
945	ZSCAN30	SCAN	Q86W11	PPP2R2A	0	0.263774	non_nuclear
946	ZNF214	KRAB-A	Q9UL59	STUB1	0	0.698197	frequent_flier
947	ZNF490	KRAB-A	Q9ULM2	STUB1	0	0.486243	frequent_flier
948	ZNF331	KRAB-A	Q9NQX6	STUB1	0.01	0.782402	frequent_flier
949	ZNF250	KRAB-A	P15622	STUB1	0	0.514872	frequent_flier
950	GLIS1	NONE	Q8NBF1	STUB1	0	0.479675	frequent_flier
951	ZNF595	KRAB-A	Q8IYB9	STUB1	0	0.382059	frequent_flier
952	ZNF257	KRAB-A	Q9Y2Q1	STUB1	0	0.814679	frequent_flier
953	ZNF34	KRAB-A	Q8IZ26	STUB1	0	0.737079	frequent_flier
954	SCRT1	SNAG	Q9BWW7	STUB1	0	0.48548	frequent_flier
955	ZNF594	NONE	Q96JF6	STUB1	0	0.287117	frequent_flier
956	ZNF419	KRAB-A	Q96HQ0	STUB1	0	0.348074	frequent_flier
957	ZNF16	NONE	P17020	STUB1	0	0.536921	frequent_flier
958	ZNF71	NONE	Q9NQZ8	STUB1	0.01	0.564254	frequent_flier
959	ZNF816	KRAB-A	Q0VGE8	STUB1	0.01	1.04891	frequent_flier
960	IKZF3	NONE	Q9UKT9	STUB1	0.01	0.566672	frequent_flier
961	ZBTB6	BTB	Q15916	STUB1	0	0.573624	frequent_flier
962	ZNF140	KRAB-A	P52738	STUB1	0	0.57659	frequent_flier
963	ZNF708	KRAB-A	P17019	STUB1	0.02	0.778077	frequent_flier
964	FEZF1	NONE	A0PJY2	STUB1	0.26	1.07729	frequent_flier
965	MZF1	SCAN	P28698	STUB1	0	0.831195	frequent_flier
966	ZBTB14	BTB	O43829	STUB1	0	0.32576	frequent_flier
967	ZBTB42	BTB	B2RXF5	STUB1	0	0.380619	frequent_flier
968	ZNF8	KRAB-A	P17098	STUB1	0	0.621037	frequent_flier
969	KLF7	NONE	O75840	STUB1	0.07	0.816774	frequent_flier
970	ZNF436	KRAB-A	Q9C0F3	STUB1	0.01	0.619223	frequent_flier
971	ZNF768	NONE	Q9H5H4	STUB1	0.1	0.910562	frequent_flier
972	KLF1	NONE	Q13351	STUB1	0.13	0.650735	frequent_flier
973	ZSCAN5C	SCAN	A6NGD5	STUB1	0.06	0.794633	frequent_flier
974	ZNF513	NONE	Q8N8E2	STUB1	0	0.585453	frequent_flier
975	ZNF667	KRAB-A	Q5HYK9	STUB1	0	0.468928	frequent_flier
976	ZFP28	KRAB-A	Q8NHY6	STUB1	0.02	0.979741	frequent_flier
977	ZNF320	KRAB-A	A2RRD8	STUB1	0	0.605953	frequent_flier
978	ZNF189	KRAB-A	O75820	STUB1	0	0.49592	frequent_flier
979	OSR2	NONE	Q8N2R0	STUB1	1	2.34014	frequent_flier
980	ZIM3	KRAB-A	Q96PE6	STUB1	0	0.67827	frequent_flier
981	MYNN	BTB	Q9NPC7	STUB1	0	0.484015	frequent_flier
982	ZFP82	KRAB-A	Q8N141	STUB1	0.04	0.80905	frequent_flier
983	PATZ1	BTB	Q9HBE1	STUB1	0.02	0.83011	frequent_flier
984	ZNF610	KRAB-A	Q8N9Z0	STUB1	0.02	1.22554	frequent_flier
985	MAZ	NONE	P56270	STUB1	0	0.478494	frequent_flier
986	ZNF449	SCAN	Q6P9G9	STUB1	0	0.432526	frequent_flier
987	ZNF280A	NONE	P59817	STUB1	0	0.775304	frequent_flier
988	GTF3A	NONE	Q92664	STUB1	0	0.641653	frequent_flier
989	ZNF547	KRAB-A	Q8IVP9	STUB1	0	0.450361	frequent_flier
990	PRDM1	SET	O75626	STUB1	0.01	0.683648	frequent_flier
991	ZNF778	KRAB-A	Q96MU6	STUB1	0	0.611355	frequent_flier
992	ZNF596	KRAB-A	Q8TC21	STUB1	0	0.353447	frequent_flier
993	ZNF37A	KRAB-A	P17032	STUB1	0.01	0.963291	frequent_flier
994	ZNF770	NONE	Q6IQ21	STUB1	0	0.34192	frequent_flier
995	ZSCAN30	SCAN	Q86W11	STUB1	0.02	0.671692	frequent_flier
996	ZNF692	NONE	Q9BU19	RAD18	1	27.971	retained
997	ZNF184	KRAB-A	Q99676	YTHDC2	0.05	1.35209	retained
998	ZFP28	KRAB-A	Q8NHY6	YTHDC2	0	1.00194	retained
999	ZNF320	KRAB-A	A2RRD8	YTHDC2	0.05	1.40123	retained
1000	ZNF610	KRAB-A	Q8N9Z0	YTHDC2	0	1.30816	retained
1001	ZNF189	KRAB-A	O75820	YTHDC2	0.14	1.51174	retained
1002	ZNF595	KRAB-A	Q8IYB9	YTHDC2	0	1.27895	retained
1003	ZNF329	NONE	Q86UD4	YTHDC2	0.05	1.25064	retained
1004	ZNF418	KRAB-A	Q8TF45	YTHDC2	0	1.08036	retained
1005	ZBTB42	BTB	B2RXF5	YTHDC2	0	1.21514	retained
1006	SCRT1	SNAG	Q9BWW7	YTHDC2	1	5.59399	retained
1007	ZNF768	NONE	Q9H5H4	YTHDC2	0	0.925373	retained
1008	ZNF419	KRAB-A	Q96HQ0	YTHDC2	0.05	1.12535	retained
1009	ZFP82	KRAB-A	Q8N141	YTHDC2	0	0.925884	retained
1010	ZNF513	NONE	Q8N8E2	YTHDC2	0.05	1.529	retained
1011	ZNF16	NONE	P17020	YTHDC2	0	1.22983	retained
1012	ZNF71	NONE	Q9NQZ8	YTHDC2	0.05	1.0655	retained
1013	ZNF778	KRAB-A	Q96MU6	YTHDC2	0.05	1.23244	retained
1014	ZNF770	NONE	Q6IQ21	YTHDC2	0	0.971471	retained
1015	ZNF667	KRAB-A	Q5HYK9	YTHDC2	0.05	1.39063	retained
1016	ZNF610	KRAB-A	Q8N9Z0	HCFC1	0	1.22978	retained
1017	MAZ	NONE	P56270	HCFC1	0.41	1.44829	retained
1018	KLF1	NONE	Q13351	HCFC1	0	1.16624	retained
1019	ZNF667	KRAB-A	Q5HYK9	HCFC1	0	1.2032	retained
1020	ZNF184	KRAB-A	Q99676	PPAN-P2RY11;PPAN	0	1.16135	retained
1021	ZNF778	KRAB-A	Q96MU6	PPAN-P2RY11;PPAN	0	1.08732	retained
1022	ZNF595	KRAB-A	Q8IYB9	PPAN-P2RY11;PPAN	0	1.35375	retained
1023	ZNF189	KRAB-A	O75820	PPAN-P2RY11;PPAN	0	1.01363	retained
1024	GTF3A	NONE	Q92664	PPAN-P2RY11;PPAN	0	1.03104	retained
1025	ZBTB42	BTB	B2RXF5	PPAN-P2RY11;PPAN	0	1.07627	retained
1026	ZNF436	KRAB-A	Q9C0F3	PPAN-P2RY11;PPAN	0.5	2.02428	retained
1027	PRDM1	SET	O75626	PPAN-P2RY11;PPAN	0	1.0462	retained
1028	KLF1	NONE	Q13351	PPAN-P2RY11;PPAN	0	0.958056	retained
1029	ZFP82	KRAB-A	Q8N141	PPAN-P2RY11;PPAN	0.54	2.09445	retained
1030	ZNF667	KRAB-A	Q5HYK9	PPAN-P2RY11;PPAN	0	1.05574	retained
1031	ZNF71	NONE	Q9NQZ8	PPAN-P2RY11;PPAN	0.28	1.59966	retained
1032	ZNF768	NONE	Q9H5H4	PPAN-P2RY11;PPAN	0.77	2.52493	retained
1033	ZNF331	KRAB-A	Q9NQX6	XRCC5	0	0.20667	frequent_flier
1034	ZNF250	KRAB-A	P15622	XRCC5	0.34	1.09822	frequent_flier
1035	GLIS1	NONE	Q8NBF1	XRCC5	0.06	1.17532	frequent_flier
1036	ZNF595	KRAB-A	Q8IYB9	XRCC5	0	0.160062	frequent_flier
1037	SCRT1	SNAG	Q9BWW7	XRCC5	1	2.96636	frequent_flier
1038	ZNF667	KRAB-A	Q5HYK9	XRCC5	0	0.160894	frequent_flier
1039	ZNF594	NONE	Q96JF6	XRCC5	0	0.571718	frequent_flier
1040	ZNF490	KRAB-A	Q9ULM2	XRCC5	0	0.168831	frequent_flier
1041	ZNF16	NONE	P17020	XRCC5	0	0.18906	frequent_flier
1042	ZNF71	NONE	Q9NQZ8	XRCC5	0	0.596666	frequent_flier
1043	ZNF816	KRAB-A	Q0VGE8	XRCC5	0	0.333593	frequent_flier
1044	ZSCAN5C	SCAN	A6NGD5	XRCC5	0	0.652899	frequent_flier
1045	ZNF320	KRAB-A	A2RRD8	XRCC5	0.47	1.35254	frequent_flier
1046	ZNF140	KRAB-A	P52738	XRCC5	0	0.318296	frequent_flier
1047	ZNF708	KRAB-A	P17019	XRCC5	0.9	1.2785	frequent_flier
1048	FEZF1	NONE	A0PJY2	XRCC5	0.5	1.45537	frequent_flier
1049	MZF1	SCAN	P28698	XRCC5	0	0.151452	frequent_flier
1050	ZBTB14	BTB	O43829	XRCC5	0	0.467141	frequent_flier
1051	ZNF18	KRAB-A;SCAN	P17022	XRCC5	0	0.375161	frequent_flier
1052	ZBTB42	BTB	B2RXF5	XRCC5	0	0.393356	frequent_flier
1053	ZFP3	NONE	Q96NJ6	XRCC5	0	0.425158	frequent_flier
1054	KLF7	NONE	O75840	XRCC5	0	0.534772	frequent_flier
1055	ZNF669	KRAB-A	Q96BR6	XRCC5	0	0.2669	frequent_flier
1056	ZNF436	KRAB-A	Q9C0F3	XRCC5	0	0.489069	frequent_flier
1057	IKZF3	NONE	Q9UKT9	XRCC5	0.02	0.666699	frequent_flier
1058	KLF1	NONE	Q13351	XRCC5	0.02	0.536683	frequent_flier
1059	ZNF418	KRAB-A	Q8TF45	XRCC5	0	0.259703	frequent_flier
1060	ZNF768	NONE	Q9H5H4	XRCC5	0	0.507333	frequent_flier
1061	ZNF184	KRAB-A	Q99676	XRCC5	0	0.222124	frequent_flier
1062	ZFP28	KRAB-A	Q8NHY6	XRCC5	0	0.286011	frequent_flier
1063	ZNF419	KRAB-A	Q96HQ0	XRCC5	0	0.672182	frequent_flier
1064	ZNF322	NONE	Q6U7Q0	XRCC5	0.33	1.18755	frequent_flier
1065	ZNF329	NONE	Q86UD4	XRCC5	0	0.325942	frequent_flier
1066	ZNF189	KRAB-A	O75820	XRCC5	0	0.288079	frequent_flier
1067	OSR2	NONE	Q8N2R0	XRCC5	0	0.626571	frequent_flier
1068	ZNF582	KRAB-A	Q96NG8	XRCC5	0	0.229917	frequent_flier
1069	MYNN	BTB	Q9NPC7	XRCC5	0	0.914006	frequent_flier
1070	ZFP82	KRAB-A	Q8N141	XRCC5	0.05	0.745555	frequent_flier
1071	PATZ1	BTB	Q9HBE1	XRCC5	0	0.674712	frequent_flier
1072	MAZ	NONE	P56270	XRCC5	0.16	0.888426	frequent_flier
1073	ZNF449	SCAN	Q6P9G9	XRCC5	0.05	0.968873	frequent_flier
1074	ZNF280A	NONE	P59817	XRCC5	0	0.345821	frequent_flier
1075	GTF3A	NONE	Q92664	XRCC5	0	0.609648	frequent_flier
1076	ZNF547	KRAB-A	Q8IVP9	XRCC5	0	0.470972	frequent_flier
1077	PRDM1	SET	O75626	XRCC5	0.17	1.13632	frequent_flier
1078	ZNF778	KRAB-A	Q96MU6	XRCC5	0	0.162405	frequent_flier
1079	ZNF596	KRAB-A	Q8TC21	XRCC5	0	0.237757	frequent_flier
1080	ZNF37A	KRAB-A	P17032	XRCC5	0	0.392902	frequent_flier
1081	ZNF549	KRAB-A	Q6P9A3	XRCC5	0	0.351013	frequent_flier
1082	ZNF770	NONE	Q6IQ21	XRCC5	0	0.205106	frequent_flier
1083	ZSCAN30	SCAN	Q86W11	XRCC5	0	0.536203	frequent_flier
1084	ZNF71	NONE	Q9NQZ8	ZKSCAN3	0	1.24707	retained
1085	ZNF331	KRAB-A	Q9NQX6	MAPK1	0.09	0.935091	retained
1086	ZNF250	KRAB-A	P15622	MAPK1	0.86	1.83315	retained
1087	GLIS1	NONE	Q8NBF1	MAPK1	0.18	1.2159	retained
1088	ZFP28	KRAB-A	Q8NHY6	MAPK1	0	0.933527	retained
1089	SCRT1	SNAG	Q9BWW7	MAPK1	0.18	1.2238	retained
1090	ZNF594	NONE	Q96JF6	MAPK1	0	0.798244	retained
1091	ZNF595	KRAB-A	Q8IYB9	MAPK1	0	0.849536	retained
1092	ZNF16	NONE	P17020	MAPK1	0	0.787982	retained
1093	ZNF71	NONE	Q9NQZ8	MAPK1	0.09	0.869693	retained
1094	ZNF816	KRAB-A	Q0VGE8	MAPK1	0	0.924608	retained
1095	ZNF708	KRAB-A	P17019	MAPK1	0.46	1.39832	retained
1096	FEZF1	NONE	A0PJY2	MAPK1	0.39	1.31632	retained
1097	ZBTB14	BTB	O43829	MAPK1	0.96	2.4534	retained
1098	ZNF547	KRAB-A	Q8IVP9	MAPK1	0.46	1.38003	retained
1099	ZNF768	NONE	Q9H5H4	MAPK1	0.09	0.95033	retained
1100	KLF1	NONE	Q13351	MAPK1	0.18	0.956648	retained
1101	ZNF513	NONE	Q8N8E2	MAPK1	0	1.06538	retained
1102	ZIM3	KRAB-A	Q96PE6	MAPK1	0.94	2.91047	retained
1103	ZNF692	NONE	Q9BU19	MAPK1	0.23	1.46121	retained
1104	ZNF189	KRAB-A	O75820	MAPK1	0	0.80554	retained
1105	OSR2	NONE	Q8N2R0	MAPK1	0.18	1.07539	retained
1106	MYNN	BTB	Q9NPC7	MAPK1	0.56	1.69737	retained
1107	ZFP82	KRAB-A	Q8N141	MAPK1	0.23	0.951249	retained
1108	PATZ1	BTB	Q9HBE1	MAPK1	0.23	1.00262	retained
1109	ZNF610	KRAB-A	Q8N9Z0	MAPK1	0	1.07703	retained
1110	MAZ	NONE	P56270	MAPK1	0.23	0.987527	retained
1111	ZNF280A	NONE	P59817	MAPK1	0.48	1.65704	retained
1112	GTF3A	NONE	Q92664	MAPK1	0.47	1.42705	retained
1113	ZBTB42	BTB	B2RXF5	MAPK1	0.09	1.0977	retained
1114	PRDM1	SET	O75626	MAPK1	0.32	1.32658	retained
1115	ZNF667	KRAB-A	Q5HYK9	MAPK1	0	0.889398	retained
1116	ZNF549	KRAB-A	Q6P9A3	MAPK1	0	0.939706	retained
1117	ZNF770	NONE	Q6IQ21	MAPK1	0	0.727392	retained
1118	ZSCAN30	SCAN	Q86W11	MAPK1	0.09	0.92357	retained
1119	ZNF140	KRAB-A	P52738	HDGF	0	1.13128	retained
1120	KLF1	NONE	Q13351	HDGF	0.5	2.60551	retained
1121	ZNF322	NONE	Q6U7Q0	HDGF	1	5.92952	retained
1122	MAZ	NONE	P56270	HDGF	0.45	2.35998	retained
1123	KLF7	NONE	O75840	HDGF	0.01	1.22314	retained
1124	SCRT1	SNAG	Q9BWW7	HDGF	0	1.06889	retained
1125	ZNF594	NONE	Q96JF6	HDGF	0.5	2.74261	retained
1126	PATZ1	BTB	Q9HBE1	HDGF	0.01	1.26565	retained
1127	IKZF3	NONE	Q9UKT9	HDGF	0.48	2.44974	retained
1128	ZSCAN30	SCAN	Q86W11	HDGF	0.04	1.43828	retained
1129	ZBTB42	BTB	B2RXF5	ZNF516	1	10.4399	retained
1130	ZNF610	KRAB-A	Q8N9Z0	NACC1	0	1.52839	retained
1131	ZBTB42	BTB	B2RXF5	NACC1	1	5.7917	retained
1132	OSR2	NONE	Q8N2R0	FTSJ1	1	3.6971	non_nuclear
1133	ZNF708	KRAB-A	P17019	SLC39A7	0	0.981795	non_nuclear
1134	FEZF1	NONE	A0PJY2	SLC39A7	0	1.00484	non_nuclear
1135	MZF1	SCAN	P28698	SLC39A7	0.5	1.76612	non_nuclear
1136	ZNF331	KRAB-A	Q9NQX6	SLC39A7	0.25	1.26468	non_nuclear
1137	OSR2	NONE	Q8N2R0	SLC39A7	0	0.966552	non_nuclear
1138	ZNF669	KRAB-A	Q96BR6	SLC39A7	0.25	1.38147	non_nuclear
1139	ZNF547	KRAB-A	Q8IVP9	SLC39A7	0.5	1.59715	non_nuclear
1140	ZNF436	KRAB-A	Q9C0F3	SLC39A7	0.25	1.13554	non_nuclear
1141	ZNF596	KRAB-A	Q8TC21	SLC39A7	0	1.02387	non_nuclear
1142	ZNF768	NONE	Q9H5H4	SLC39A7	0	1.18075	non_nuclear
1143	ZNF490	KRAB-A	Q9ULM2	SLC39A7	0	1.28856	non_nuclear
1144	PATZ1	BTB	Q9HBE1	SLC39A7	0	0.999467	non_nuclear
1145	ZNF71	NONE	Q9NQZ8	SLC39A7	0	0.931493	non_nuclear
1146	ZNF563	KRAB-A	Q8TA94	SLC39A7	1	5.51151	non_nuclear
1147	ZNF320	KRAB-A	A2RRD8	SLC39A7	0	1.24384	non_nuclear
1148	MAZ	NONE	P56270	CHAMP1	0.5	1.90564	retained
1149	ZNF547	KRAB-A	Q8IVP9	CHAMP1	1	2.38453	retained
1150	ZNF768	NONE	Q9H5H4	CHAMP1	0	1.15562	retained
1151	ZNF16	NONE	P17020	CHAMP1	0	1.19022	retained
1152	ZNF71	NONE	Q9NQZ8	CHAMP1	0.91	1.85942	retained
1153	ZNF816	KRAB-A	Q0VGE8	CHAMP1	0	1.21997	retained
1154	ZNF214	KRAB-A	Q9UL59	DCAF7	0.05	1.16521	retained
1155	ZNF331	KRAB-A	Q9NQX6	DCAF7	0.99	2.78888	retained
1156	ZNF250	KRAB-A	P15622	DCAF7	0.05	0.736946	retained
1157	GLIS1	NONE	Q8NBF1	DCAF7	0.58	1.67194	retained
1158	ZNF595	KRAB-A	Q8IYB9	DCAF7	0	0.950683	retained
1159	ZFP28	KRAB-A	Q8NHY6	DCAF7	0	0.849261	retained
1160	SCRT1	SNAG	Q9BWW7	DCAF7	0.47	1.5404	retained
1161	ZNF594	NONE	Q96JF6	DCAF7	0.29	0.961275	retained
1162	ZNF490	KRAB-A	Q9ULM2	DCAF7	0.56	1.83035	retained
1163	ZNF16	NONE	P17020	DCAF7	0.05	0.871963	retained
1164	ZNF71	NONE	Q9NQZ8	DCAF7	0.28	1.11296	retained
1165	ZNF816	KRAB-A	Q0VGE8	DCAF7	0.05	1.04913	retained
1166	ZSCAN5C	SCAN	A6NGD5	DCAF7	0.1	0.96487	retained
1167	ZNF140	KRAB-A	P52738	DCAF7	0.05	0.980658	retained
1168	ZNF708	KRAB-A	P17019	DCAF7	0.97	2.15365	retained
1169	FEZF1	NONE	A0PJY2	DCAF7	1	4.45116	retained
1170	MZF1	SCAN	P28698	DCAF7	0.1	1.25264	retained
1171	ZBTB14	BTB	O43829	DCAF7	0	0.71639	retained
1172	ZNF547	KRAB-A	Q8IVP9	DCAF7	0.89	1.8681	retained
1173	ZNF669	KRAB-A	Q96BR6	DCAF7	0.99	3.53858	retained
1174	ZNF436	KRAB-A	Q9C0F3	DCAF7	0	0.546138	retained
1175	ZNF768	NONE	Q9H5H4	DCAF7	0.95	1.98757	retained
1176	KLF1	NONE	Q13351	DCAF7	0.29	0.951303	retained
1177	ZNF418	KRAB-A	Q8TF45	DCAF7	0.05	1.00422	retained
1178	ZNF513	NONE	Q8N8E2	DCAF7	0	0.988633	retained
1179	ZNF667	KRAB-A	Q5HYK9	DCAF7	0.29	1.22633	retained
1180	ZNF692	NONE	Q9BU19	DCAF7	0	0.978108	retained
1181	ZNF419	KRAB-A	Q96HQ0	DCAF7	0.05	0.853828	retained
1182	ZNF189	KRAB-A	O75820	DCAF7	0.28	1.22308	retained
1183	OSR2	NONE	Q8N2R0	DCAF7	1	2.94889	retained
1184	ZFP82	KRAB-A	Q8N141	DCAF7	0.84	1.73638	retained
1185	ZNF610	KRAB-A	Q8N9Z0	DCAF7	0	1.00122	retained
1186	MAZ	NONE	P56270	DCAF7	0.48	1.28238	retained
1187	ZNF280A	NONE	P59817	DCAF7	0	0.735497	retained
1188	GTF3A	NONE	Q92664	DCAF7	0	0.620831	retained
1189	ZBTB42	BTB	B2RXF5	DCAF7	0.34	1.44535	retained
1190	PRDM1	SET	O75626	DCAF7	1	8.19697	retained
1191	ZNF778	KRAB-A	Q96MU6	DCAF7	0.05	1.02943	retained
1192	ZNF596	KRAB-A	Q8TC21	DCAF7	0	0.670249	retained
1193	ZNF549	KRAB-A	Q6P9A3	DCAF7	0	0.88192	retained
1194	ZNF770	NONE	Q6IQ21	DCAF7	0.1	1.07516	retained
1195	GTF3A	NONE	Q92664	GLDC	0	1.07386	non_nuclear
1196	ZNF708	KRAB-A	P17019	GLDC	0.91	2.19908	non_nuclear
1197	FEZF1	NONE	A0PJY2	GLDC	0.9	2.00503	non_nuclear
1198	ZNF331	KRAB-A	Q9NQX6	GLDC	0.41	1.34894	non_nuclear
1199	ZFP82	KRAB-A	Q8N141	GLDC	0.48	1.51133	non_nuclear
1200	MAZ	NONE	P56270	GLDC	0.91	5.18245	non_nuclear
1201	KLF7	NONE	O75840	GLDC	1	9.51882	non_nuclear
1202	ZNF768	NONE	Q9H5H4	GLDC	1	5.79036	non_nuclear
1203	ZNF490	KRAB-A	Q9ULM2	GLDC	0.91	2.32416	non_nuclear
1204	ZNF513	NONE	Q8N8E2	GLDC	0	1.40302	non_nuclear
1205	ZNF16	NONE	P17020	GLDC	0	1.1201	non_nuclear
1206	ZNF71	NONE	Q9NQZ8	GLDC	0.5	2.33653	non_nuclear
1207	ZNF563	KRAB-A	Q8TA94	GLDC	0	1.08734	non_nuclear
1208	ZSCAN5C	SCAN	A6NGD5	GLDC	0	1.28129	non_nuclear
1209	ZNF214	KRAB-A	Q9UL59	UBTF	0	1.42857	retained
1210	ZNF250	KRAB-A	P15622	UBTF	0	1.00524	retained
1211	ZNF34	KRAB-A	Q8IZ26	UBTF	0	1.09048	retained
1212	ZNF596	KRAB-A	Q8TC21	UBTF	0.45	1.26587	retained
1213	ZNF594	NONE	Q96JF6	UBTF	1	6.04481	retained
1214	ZNF595	KRAB-A	Q8IYB9	UBTF	1	4.15435	retained
1215	ZNF16	NONE	P17020	UBTF	1	4.03052	retained
1216	ZNF71	NONE	Q9NQZ8	UBTF	1	2.78652	retained
1217	ZNF816	KRAB-A	Q0VGE8	UBTF	1	2.83731	retained
1218	ZSCAN5C	SCAN	A6NGD5	UBTF	0.95	1.83632	retained
1219	ZNF140	KRAB-A	P52738	UBTF	0	1.11607	retained
1220	ZNF708	KRAB-A	P17019	UBTF	1	4.20543	retained
1221	FEZF1	NONE	A0PJY2	UBTF	1	4.51418	retained
1222	ZNF547	KRAB-A	Q8IVP9	UBTF	0.45	1.21077	retained
1223	ZNF436	KRAB-A	Q9C0F3	UBTF	1	2.80061	retained
1224	ZNF768	NONE	Q9H5H4	UBTF	1	4.59782	retained
1225	ZNF419	KRAB-A	Q96HQ0	UBTF	1	4.60889	retained
1226	ZNF418	KRAB-A	Q8TF45	UBTF	0.5	2.08064	retained
1227	ZNF513	NONE	Q8N8E2	UBTF	0	1.35679	retained
1228	ZNF667	KRAB-A	Q5HYK9	UBTF	1	5.01556	retained
1229	ZFP28	KRAB-A	Q8NHY6	UBTF	0.45	1.28677	retained
1230	ZNF320	KRAB-A	A2RRD8	UBTF	1	3.26791	retained
1231	ZNF189	KRAB-A	O75820	UBTF	1	2.26399	retained
1232	MYNN	BTB	Q9NPC7	UBTF	1	2.38242	retained
1233	ZFP82	KRAB-A	Q8N141	UBTF	1	6.08312	retained
1234	ZNF610	KRAB-A	Q8N9Z0	UBTF	0.5	2.07859	retained
1235	MAZ	NONE	P56270	UBTF	0.5	1.66083	retained
1236	ZNF449	SCAN	Q6P9G9	UBTF	0.95	2.84438	retained
1237	GTF3A	NONE	Q92664	UBTF	1	5.10505	retained
1238	ZBTB42	BTB	B2RXF5	UBTF	0.5	1.51256	retained
1239	PRDM1	SET	O75626	UBTF	0	1.02972	retained
1240	ZNF778	KRAB-A	Q96MU6	UBTF	1	3.80917	retained
1241	ZNF549	KRAB-A	Q6P9A3	UBTF	0	1.14777	retained
1242	ZNF770	NONE	Q6IQ21	UBTF	1	4.11706	retained
1243	ZSCAN30	SCAN	Q86W11	UBTF	0.45	1.40235	retained
1244	ZNF331	KRAB-A	Q9NQX6	PDCD6	0	0.977678	non_nuclear
1245	GLIS1	NONE	Q8NBF1	PDCD6	0.45	1.36228	non_nuclear
1246	SCRT1	SNAG	Q9BWW7	PDCD6	0	0.959779	non_nuclear
1247	ZNF595	KRAB-A	Q8IYB9	PDCD6	0	1.03347	non_nuclear
1248	ZNF816	KRAB-A	Q0VGE8	PDCD6	0	1.0829	non_nuclear
1249	IKZF3	NONE	Q9UKT9	PDCD6	0.45	1.02854	non_nuclear
1250	ZNF140	KRAB-A	P52738	PDCD6	0.45	1.27191	non_nuclear
1251	ZNF708	KRAB-A	P17019	PDCD6	0.91	1.48147	non_nuclear
1252	FEZF1	NONE	A0PJY2	PDCD6	0.5	1.52583	non_nuclear
1253	KLF7	NONE	O75840	PDCD6	0.5	1.25248	non_nuclear
1254	ZNF436	KRAB-A	Q9C0F3	PDCD6	0.45	1.03383	non_nuclear
1255	ZNF768	NONE	Q9H5H4	PDCD6	0.95	1.65663	non_nuclear
1256	KLF1	NONE	Q13351	PDCD6	1	1.87267	non_nuclear
1257	ZNF418	KRAB-A	Q8TF45	PDCD6	0	1.06099	non_nuclear
1258	ZNF667	KRAB-A	Q5HYK9	PDCD6	0.45	1.15072	non_nuclear
1259	ZFP28	KRAB-A	Q8NHY6	PDCD6	0.45	1.18419	non_nuclear
1260	ZNF320	KRAB-A	A2RRD8	PDCD6	0.45	1.36359	non_nuclear
1261	ZNF322	NONE	Q6U7Q0	PDCD6	0.91	1.51825	non_nuclear
1262	ZNF189	KRAB-A	O75820	PDCD6	0.45	1.27308	non_nuclear
1263	OSR2	NONE	Q8N2R0	PDCD6	0.5	1.64089	non_nuclear
1264	ZFP82	KRAB-A	Q8N141	PDCD6	0.5	1.46726	non_nuclear
1265	PATZ1	BTB	Q9HBE1	PDCD6	0.45	1.1222	non_nuclear
1266	ZNF563	KRAB-A	Q8TA94	PDCD6	0	0.937203	non_nuclear
1267	MAZ	NONE	P56270	PDCD6	0.91	1.50148	non_nuclear
1268	ZNF449	SCAN	Q6P9G9	PDCD6	0	0.966922	non_nuclear
1269	ZBTB42	BTB	B2RXF5	PDCD6	0.45	1.18458	non_nuclear
1270	PRDM1	SET	O75626	PDCD6	0.45	1.33411	non_nuclear
1271	ZNF778	KRAB-A	Q96MU6	PDCD6	0	1.20307	non_nuclear
1272	ZNF394	KRAB-A;SCAN	Q53GI3	PDCD6	0.45	1.38628	non_nuclear
1273	ZNF770	NONE	Q6IQ21	PDCD6	0.91	1.54608	non_nuclear
1274	ZSCAN30	SCAN	Q86W11	PDCD6	0.91	1.44047	non_nuclear
1275	ZNF669	KRAB-A	Q96BR6	ZNF669	0	1	retained
1276	ZNF502	NONE	Q8TBZ5	ZNF669	1	5.31537	retained
1277	IKZF3	NONE	Q9UKT9	WDR61	0.32	1.22989	retained
1278	ZNF594	NONE	Q96JF6	WDR61	0.32	1.32548	retained
1279	ZNF490	KRAB-A	Q9ULM2	WDR61	0	0.789439	retained
1280	ZNF71	NONE	Q9NQZ8	WDR61	0.07	0.973851	retained
1281	ZSCAN5C	SCAN	A6NGD5	WDR61	0.04	0.91901	retained
1282	ZNF320	KRAB-A	A2RRD8	WDR61	0.41	1.65728	retained
1283	ZNF708	KRAB-A	P17019	WDR61	0.94	2.77359	retained
1284	FEZF1	NONE	A0PJY2	WDR61	1	3.21036	retained
1285	ZNF436	KRAB-A	Q9C0F3	WDR61	0.41	1.36775	retained
1286	ZNF768	NONE	Q9H5H4	WDR61	0.94	2.31178	retained
1287	KLF1	NONE	Q13351	WDR61	0.12	0.810473	retained
1288	ZNF419	KRAB-A	Q96HQ0	WDR61	0.41	1.4897	retained
1289	ZNF322	NONE	Q6U7Q0	WDR61	0.04	0.98367	retained
1290	OSR2	NONE	Q8N2R0	WDR61	0	0.641218	retained
1291	MYNN	BTB	Q9NPC7	WDR61	0.29	1.35223	retained
1292	ZFP82	KRAB-A	Q8N141	WDR61	0.62	1.89856	retained
1293	MAZ	NONE	P56270	WDR61	0.25	1.3972	retained
1294	ZNF449	SCAN	Q6P9G9	WDR61	0.04	0.899353	retained
1295	ZNF280A	NONE	P59817	WDR61	0.04	0.956556	retained
1296	GTF3A	NONE	Q92664	WDR61	0	0.67652	retained
1297	ZNF547	KRAB-A	Q8IVP9	WDR61	0	0.65365	retained
1298	ZSCAN30	SCAN	Q86W11	WDR61	0.12	1.0357	retained
1299	ZNF214	KRAB-A	Q9UL59	CTBP1	0	1.18064	retained
1300	ZNF708	KRAB-A	P17019	CTBP1	0	1.01044	retained
1301	FEZF1	NONE	A0PJY2	CTBP1	0.5	1.68924	retained
1302	MZF1	SCAN	P28698	CTBP1	0	1.09938	retained
1303	ZNF770	NONE	Q6IQ21	CTBP1	0	1.04136	retained
1304	MAZ	NONE	P56270	CTBP1	0.5	2.32022	retained
1305	ZNF189	KRAB-A	O75820	CTBP1	0	1.00139	retained
1306	ZNF34	KRAB-A	Q8IZ26	CTBP1	0	1.09477	retained
1307	OSR2	NONE	Q8N2R0	CTBP1	0.5	1.84281	retained
1308	KLF7	NONE	O75840	CTBP1	0.5	1.62052	retained
1309	ZBTB42	BTB	B2RXF5	CTBP1	1	9.22146	retained
1310	PRDM1	SET	O75626	CTBP1	0.98	2.35448	retained
1311	KLF1	NONE	Q13351	CTBP1	0	0.944013	retained
1312	ZNF490	KRAB-A	Q9ULM2	CTBP1	0	1.0849	retained
1313	PATZ1	BTB	Q9HBE1	CTBP1	0.5	1.68111	retained
1314	ZNF549	KRAB-A	Q6P9A3	CTBP1	0	1.3953	retained
1315	ZNF816	KRAB-A	Q0VGE8	CTBP1	0	1.38714	retained
1316	IKZF3	NONE	Q9UKT9	CTBP1	0.48	1.37463	retained
1317	GTF3A	NONE	Q92664	GTF3C3	1	14.3217	retained
1318	ZNF71	NONE	Q9NQZ8	GTF3C3	0.41	1.44745	retained
1319	ZNF768	NONE	Q9H5H4	GTF3C3	0	1.46172	retained
1320	ZFP82	KRAB-A	Q8N141	GTF3C3	1	4.53535	retained
1321	ZNF610	KRAB-A	Q8N9Z0	GTF3C5	0.45	1.69881	retained
1322	ZFP28	KRAB-A	Q8NHY6	GTF3C5	0	1.1562	retained
1323	FEZF1	NONE	A0PJY2	GTF3C5	0	1.13507	retained
1324	ZNF418	KRAB-A	Q8TF45	GTF3C5	0	1.19291	retained
1325	ZNF189	KRAB-A	O75820	GTF3C5	0.45	1.35297	retained
1326	GTF3A	NONE	Q92664	GTF3C5	1	4.95895	retained
1327	ZBTB42	BTB	B2RXF5	GTF3C5	0	1.15635	retained
1328	ZNF778	KRAB-A	Q96MU6	GTF3C5	0	1.16327	retained
1329	ZFP82	KRAB-A	Q8N141	GTF3C5	1	3.01597	retained
1330	ZNF549	KRAB-A	Q6P9A3	GTF3C5	0	1.20567	retained
1331	ZNF770	NONE	Q6IQ21	GTF3C5	0	1.14103	retained
1332	ZNF667	KRAB-A	Q5HYK9	GTF3C5	0	1.38618	retained
1333	ZNF184	KRAB-A	Q99676	DDX50	0	1.1793	retained
1334	ZNF708	KRAB-A	P17019	DDX50	0	1.00968	retained
1335	MAZ	NONE	P56270	DDX50	0	0.723451	retained
1336	ZNF595	KRAB-A	Q8IYB9	DDX50	0	1.0625	retained
1337	ZNF189	KRAB-A	O75820	DDX50	0.01	1.13795	retained
1338	ZBTB42	BTB	B2RXF5	DDX50	0	0.969282	retained
1339	OSR2	NONE	Q8N2R0	DDX50	0	0.6875	retained
1340	KLF7	NONE	O75840	DDX50	0	0.678005	retained
1341	ZNF34	KRAB-A	Q8IZ26	DDX50	0	0.850389	retained
1342	ZNF436	KRAB-A	Q9C0F3	DDX50	0.04	1.06046	retained
1343	ZNF768	NONE	Q9H5H4	DDX50	0.98	5.43935	retained
1344	KLF1	NONE	Q13351	DDX50	0.49	2.05197	retained
1345	ZFP82	KRAB-A	Q8N141	DDX50	0.1	1.73644	retained
1346	ZNF16	NONE	P17020	DDX50	0	0.816621	retained
1347	ZNF563	KRAB-A	Q8TA94	DDX50	0	0.748354	retained
1348	ZSCAN5C	SCAN	A6NGD5	DDX50	0	0.691247	retained
1349	ZNF667	KRAB-A	Q5HYK9	DDX50	0	0.763369	retained
1350	ZNF768	NONE	Q9H5H4	CMTR1	1	4.50624	retained
1351	ZNF331	KRAB-A	Q9NQX6	NUP160	0.25	1.38102	retained
1352	ZNF250	KRAB-A	P15622	NUP160	0.09	0.93122	retained
1353	ZNF595	KRAB-A	Q8IYB9	NUP160	0	1.00213	retained
1354	SCRT1	SNAG	Q9BWW7	NUP160	0.55	1.95027	retained
1355	ZNF594	NONE	Q96JF6	NUP160	0	0.767204	retained
1356	ZNF490	KRAB-A	Q9ULM2	NUP160	0.25	1.44274	retained
1357	ZNF16	NONE	P17020	NUP160	0	0.763635	retained
1358	ZNF71	NONE	Q9NQZ8	NUP160	0.09	0.709094	retained
1359	ZNF140	KRAB-A	P52738	NUP160	0.09	1.2115	retained
1360	ZNF708	KRAB-A	P17019	NUP160	0.63	1.9001	retained
1361	FEZF1	NONE	A0PJY2	NUP160	0.73	2.28992	retained
1362	ZNF8	KRAB-A	P17098	NUP160	0	0.880838	retained
1363	ZFP3	NONE	Q96NJ6	NUP160	0	0.821224	retained
1364	ZNF669	KRAB-A	Q96BR6	NUP160	0	0.927655	retained
1365	ZNF436	KRAB-A	Q9C0F3	NUP160	0.31	1.09385	retained
1366	ZNF768	NONE	Q9H5H4	NUP160	0.79	2.2763	retained
1367	KLF1	NONE	Q13351	NUP160	0	0.558944	retained
1368	ZNF513	NONE	Q8N8E2	NUP160	0	1.03851	retained
1369	ZNF667	KRAB-A	Q5HYK9	NUP160	0	0.858921	retained
1370	ZNF320	KRAB-A	A2RRD8	NUP160	0	0.871521	retained
1371	ZNF322	NONE	Q6U7Q0	NUP160	0	0.824976	retained
1372	ZNF189	KRAB-A	O75820	NUP160	0	0.638816	retained
1373	ZNF329	NONE	Q86UD4	NUP160	0.09	1.12515	retained
1374	OSR2	NONE	Q8N2R0	NUP160	0	0.63122	retained
1375	ZFP82	KRAB-A	Q8N141	NUP160	0.47	1.5967	retained
1376	PATZ1	BTB	Q9HBE1	NUP160	0.16	0.966417	retained
1377	ZNF394	KRAB-A;SCAN	Q53GI3	NUP160	0	1.00842	retained
1378	ZNF549	KRAB-A	Q6P9A3	NUP160	0	0.919621	retained
1379	MAZ	NONE	P56270	NUP160	0.58	2.36934	retained
1380	ZNF280A	NONE	P59817	NUP160	0	0.77952	retained
1381	GTF3A	NONE	Q92664	NUP160	0.82	2.50721	retained
1382	ZNF547	KRAB-A	Q8IVP9	NUP160	0	0.780381	retained
1383	PRDM1	SET	O75626	NUP160	0.09	0.838864	retained
1384	ZNF18	KRAB-A;SCAN	P17022	NUP160	0	0.868233	retained
1385	ZNF563	KRAB-A	Q8TA94	NUP160	0.85	2.90119	retained
1386	ZNF770	NONE	Q6IQ21	NUP160	0	0.702189	retained
1387	ZSCAN30	SCAN	Q86W11	NUP160	0.19	1.01933	retained
1388	MAZ	NONE	P56270	SKI	0	1.26089	retained
1389	GLIS1	NONE	Q8NBF1	SKI	1	5.01574	retained
1390	ZNF331	KRAB-A	Q9NQX6	RNH1	0.01	0.975482	non_nuclear
1391	ZNF250	KRAB-A	P15622	RNH1	0	0.719649	non_nuclear
1392	ZNF595	KRAB-A	Q8IYB9	RNH1	0	0.831403	non_nuclear
1393	ZNF34	KRAB-A	Q8IZ26	RNH1	0	0.886845	non_nuclear
1394	SCRT1	SNAG	Q9BWW7	RNH1	0.01	1.09869	non_nuclear
1395	ZNF594	NONE	Q96JF6	RNH1	0	0.544664	non_nuclear
1396	ZNF490	KRAB-A	Q9ULM2	RNH1	0	1.04752	non_nuclear
1397	ZNF16	NONE	P17020	RNH1	0	0.444797	non_nuclear
1398	ZNF71	NONE	Q9NQZ8	RNH1	0	0.738312	non_nuclear
1399	ZNF816	KRAB-A	Q0VGE8	RNH1	0	0.721962	non_nuclear
1400	IKZF3	NONE	Q9UKT9	RNH1	0	0.551282	non_nuclear
1401	ZBTB6	BTB	Q15916	RNH1	0	1.3167	non_nuclear
1402	ZNF140	KRAB-A	P52738	RNH1	0	0.873287	non_nuclear
1403	ZNF708	KRAB-A	P17019	RNH1	0.28	1.30969	non_nuclear
1404	FEZF1	NONE	A0PJY2	RNH1	0	0.774889	non_nuclear
1405	ZBTB14	BTB	O43829	RNH1	0	0.911868	non_nuclear
1406	ZBTB42	BTB	B2RXF5	RNH1	0	0.609928	non_nuclear
1407	ZNF8	KRAB-A	P17098	RNH1	0	1.05059	non_nuclear
1408	KLF7	NONE	O75840	RNH1	0	0.530704	non_nuclear
1409	ZNF669	KRAB-A	Q96BR6	RNH1	0	0.757636	non_nuclear
1410	ZNF436	KRAB-A	Q9C0F3	RNH1	0.04	0.62192	non_nuclear
1411	ZSCAN5C	SCAN	A6NGD5	RNH1	0.14	0.973635	non_nuclear
1412	KLF1	NONE	Q13351	RNH1	0.01	0.633526	non_nuclear
1413	ZNF418	KRAB-A	Q8TF45	RNH1	0	0.554159	non_nuclear
1414	ZNF513	NONE	Q8N8E2	RNH1	0	0.884688	non_nuclear
1415	ZIM3	KRAB-A	Q96PE6	RNH1	0.01	1.73507	non_nuclear
1416	ZFP28	KRAB-A	Q8NHY6	RNH1	0	0.791044	non_nuclear
1417	GLIS1	NONE	Q8NBF1	RNH1	0	0.4027	non_nuclear
1418	ZNF419	KRAB-A	Q96HQ0	RNH1	0.58	1.43242	non_nuclear
1419	ZNF320	KRAB-A	A2RRD8	RNH1	0	0.746846	non_nuclear
1420	ZNF322	NONE	Q6U7Q0	RNH1	0	0.449662	non_nuclear
1421	ZNF189	KRAB-A	O75820	RNH1	0	0.623993	non_nuclear
1422	ZNF768	NONE	Q9H5H4	RNH1	1	2.86242	non_nuclear
1423	MYNN	BTB	Q9NPC7	RNH1	0.08	1.35443	non_nuclear
1424	ZFP82	KRAB-A	Q8N141	RNH1	0.75	1.49499	non_nuclear
1425	ZNF394	KRAB-A;SCAN	Q53GI3	RNH1	0	0.736021	non_nuclear
1426	ZNF449	SCAN	Q6P9G9	RNH1	0	0.503839	non_nuclear
1427	GTF3A	NONE	Q92664	RNH1	0.36	1.35209	non_nuclear
1428	ZNF547	KRAB-A	Q8IVP9	RNH1	0.54	1.50059	non_nuclear
1429	PRDM1	SET	O75626	RNH1	0.36	1.43119	non_nuclear
1430	ZNF778	KRAB-A	Q96MU6	RNH1	0	0.733261	non_nuclear
1431	ZNF596	KRAB-A	Q8TC21	RNH1	0	0.486092	non_nuclear
1432	ZNF667	KRAB-A	Q5HYK9	RNH1	0	0.646178	non_nuclear
1433	ZNF563	KRAB-A	Q8TA94	RNH1	0	0.462471	non_nuclear
1434	ZNF770	NONE	Q6IQ21	RNH1	0	0.720027	non_nuclear
1435	ZNF16	NONE	P17020	MRPS24	0.45	1.76382	non_nuclear
1436	ZNF610	KRAB-A	Q8N9Z0	CHD4	0.13	1.68567	retained
1437	ZNF708	KRAB-A	P17019	CHD4	0.18	1.4553	retained
1438	FEZF1	NONE	A0PJY2	CHD4	0.24	1.68074	retained
1439	MZF1	SCAN	P28698	CHD4	0	0.856465	retained
1440	ZNF250	KRAB-A	P15622	CHD4	0.04	0.856856	retained
1441	MAZ	NONE	P56270	CHD4	0.09	1.02671	retained
1442	ZNF189	KRAB-A	O75820	CHD4	0.3	1.57427	retained
1443	OSR2	NONE	Q8N2R0	CHD4	0.09	1.12085	retained
1444	KLF7	NONE	O75840	CHD4	0.04	0.818494	retained
1445	ZNF547	KRAB-A	Q8IVP9	CHD4	0.04	0.993017	retained
1446	ZNF436	KRAB-A	Q9C0F3	CHD4	0.13	1.19263	retained
1447	ZNF768	NONE	Q9H5H4	CHD4	0.76	3.20328	retained
1448	KLF1	NONE	Q13351	CHD4	0	0.612064	retained
1449	ZFP82	KRAB-A	Q8N141	CHD4	0.24	1.58153	retained
1450	PATZ1	BTB	Q9HBE1	CHD4	0.98	7.25329	retained
1451	ZNF16	NONE	P17020	CHD4	0	0.813932	retained
1452	ZNF667	KRAB-A	Q5HYK9	CHD4	0	0.760561	retained
1453	ZNF563	KRAB-A	Q8TA94	CHD4	0	0.745519	retained
1454	ZNF778	KRAB-A	Q96MU6	CHD4	0	0.817019	retained
1455	IKZF3	NONE	Q9UKT9	CHD4	0.2	1.18352	retained
1456	ZNF320	KRAB-A	A2RRD8	CHD4	0.04	1.09808	retained
1457	ZNF214	KRAB-A	Q9UL59	PRMT5	0	0.892829	frequent_flier
1458	ZNF331	KRAB-A	Q9NQX6	PRMT5	0.56	1.78621	frequent_flier
1459	ZNF250	KRAB-A	P15622	PRMT5	1	2.78704	frequent_flier
1460	ZNF692	NONE	Q9BU19	PRMT5	1	5.43644	frequent_flier
1461	ZNF595	KRAB-A	Q8IYB9	PRMT5	0	0.754907	frequent_flier
1462	ZNF257	KRAB-A	Q9Y2Q1	PRMT5	0	1.00306	frequent_flier
1463	ZNF34	KRAB-A	Q8IZ26	PRMT5	0	0.713924	frequent_flier
1464	SCRT1	SNAG	Q9BWW7	PRMT5	0.98	2.42313	frequent_flier
1465	ZNF594	NONE	Q96JF6	PRMT5	0.04	0.648472	frequent_flier
1466	ZNF490	KRAB-A	Q9ULM2	PRMT5	0.41	1.70995	frequent_flier
1467	ZNF16	NONE	P17020	PRMT5	0.14	1.4551	frequent_flier
1468	ZNF71	NONE	Q9NQZ8	PRMT5	1	1.91181	frequent_flier
1469	ZNF816	KRAB-A	Q0VGE8	PRMT5	0	1.01216	frequent_flier
1470	ZSCAN5C	SCAN	A6NGD5	PRMT5	1	2.44806	frequent_flier
1471	ZNF140	KRAB-A	P52738	PRMT5	0.01	1.14591	frequent_flier
1472	ZNF708	KRAB-A	P17019	PRMT5	1	2.62502	frequent_flier
1473	FEZF1	NONE	A0PJY2	PRMT5	0.87	2.15722	frequent_flier
1474	MZF1	SCAN	P28698	PRMT5	0.01	1.16107	frequent_flier
1475	ZBTB14	BTB	O43829	PRMT5	0.01	0.758224	frequent_flier
1476	ZBTB42	BTB	B2RXF5	PRMT5	0.98	2.73598	frequent_flier
1477	ZNF8	KRAB-A	P17098	PRMT5	0	1.0924	frequent_flier
1478	KLF7	NONE	O75840	PRMT5	0.04	0.849955	frequent_flier
1479	ZNF669	KRAB-A	Q96BR6	PRMT5	0.01	1.19799	frequent_flier
1480	ZNF436	KRAB-A	Q9C0F3	PRMT5	0.37	0.859498	frequent_flier
1481	ZNF768	NONE	Q9H5H4	PRMT5	1	4.0786	frequent_flier
1482	ZNF419	KRAB-A	Q96HQ0	PRMT5	1	2.50398	frequent_flier
1483	ZNF418	KRAB-A	Q8TF45	PRMT5	0	0.699159	frequent_flier
1484	ZNF513	NONE	Q8N8E2	PRMT5	0	1.04087	frequent_flier
1485	ZNF667	KRAB-A	Q5HYK9	PRMT5	1	2.61538	frequent_flier
1486	ZNF184	KRAB-A	Q99676	PRMT5	0	0.651123	frequent_flier
1487	ZFP28	KRAB-A	Q8NHY6	PRMT5	0.11	1.11477	frequent_flier
1488	GLIS1	NONE	Q8NBF1	PRMT5	0.02	1.0512	frequent_flier
1489	ZNF320	KRAB-A	A2RRD8	PRMT5	1	3.48448	frequent_flier
1490	ZNF329	NONE	Q86UD4	PRMT5	0.04	1.1179	frequent_flier
1491	ZNF596	KRAB-A	Q8TC21	PRMT5	0	0.778473	frequent_flier
1492	ZNF189	KRAB-A	O75820	PRMT5	0.27	1.18592	frequent_flier
1493	OSR2	NONE	Q8N2R0	PRMT5	0.69	1.46241	frequent_flier
1494	ZIM3	KRAB-A	Q96PE6	PRMT5	0	0.720141	frequent_flier
1495	ZNF582	KRAB-A	Q96NG8	PRMT5	0	0.716908	frequent_flier
1496	MYNN	BTB	Q9NPC7	PRMT5	0.01	0.878455	frequent_flier
1497	ZFP82	KRAB-A	Q8N141	PRMT5	0.87	1.87907	frequent_flier
1498	PATZ1	BTB	Q9HBE1	PRMT5	0.95	2.20201	frequent_flier
1499	ZNF394	KRAB-A;SCAN	Q53GI3	PRMT5	0	0.758088	frequent_flier
1500	KLF1	NONE	Q13351	PRMT5	0	0.356997	frequent_flier
1501	ZNF610	KRAB-A	Q8N9Z0	PRMT5	0	1.06164	frequent_flier
1502	ZNF37A	KRAB-A	P17032	PRMT5	0	0.681039	frequent_flier
1503	ZNF549	KRAB-A	Q6P9A3	PRMT5	0	0.908397	frequent_flier
1504	MAZ	NONE	P56270	PRMT5	0.37	0.942839	frequent_flier
1505	ZNF280A	NONE	P59817	PRMT5	0.59	2.015	frequent_flier
1506	GTF3A	NONE	Q92664	PRMT5	1	2.86893	frequent_flier
1507	ZNF547	KRAB-A	Q8IVP9	PRMT5	0.59	1.50431	frequent_flier
1508	PRDM1	SET	O75626	PRMT5	0.22	1.33425	frequent_flier
1509	ZNF778	KRAB-A	Q96MU6	PRMT5	0	0.767672	frequent_flier
1510	ZNF18	KRAB-A;SCAN	P17022	PRMT5	0.01	1.18774	frequent_flier
1511	ZNF502	NONE	Q8TBZ5	PRMT5	0.01	1.36447	frequent_flier
1512	ZNF563	KRAB-A	Q8TA94	PRMT5	0.96	2.01874	frequent_flier
1513	ZNF770	NONE	Q6IQ21	PRMT5	0.04	1.01693	frequent_flier
1514	ZNF331	KRAB-A	Q9NQX6	GYS1	0.49	2.21015	retained
1515	ZFP28	KRAB-A	Q8NHY6	GYS1	0	1.07109	retained
1516	ZBTB14	BTB	O43829	GYS1	0	1.07946	retained
1517	GLIS1	NONE	Q8NBF1	GYS1	0.49	2.40109	retained
1518	GTF3A	NONE	Q92664	GYS1	0.49	1.67852	retained
1519	SCRT1	SNAG	Q9BWW7	GYS1	0	1.28325	retained
1520	ZNF768	NONE	Q9H5H4	GYS1	0	1.22351	retained
1521	ZNF513	NONE	Q8N8E2	GYS1	0.61	2.08366	retained
1522	ZNF16	NONE	P17020	GYS1	0	1.31051	retained
1523	ZNF71	NONE	Q9NQZ8	GYS1	0.36	1.58857	retained
1524	ZNF708	KRAB-A	P17019	KPNA6	1	3.88037	non_nuclear
1525	ZNF320	KRAB-A	A2RRD8	KPNA6	0	1.12294	non_nuclear
1526	KLF1	NONE	Q13351	KPNA6	0	1.04343	non_nuclear
1527	GLIS1	NONE	Q8NBF1	KPNA6	0.45	1.36087	non_nuclear
1528	KLF7	NONE	O75840	KPNA6	0.45	1.30706	non_nuclear
1529	ZNF669	KRAB-A	Q96BR6	KPNA6	0	1.19459	non_nuclear
1530	ZNF18	KRAB-A;SCAN	P17022	KPNA6	0	1.1769	non_nuclear
1531	ZNF768	NONE	Q9H5H4	KPNA6	0.5	2.70565	non_nuclear
1532	MYNN	BTB	Q9NPC7	KPNA6	0	1.12396	non_nuclear
1533	ZNF71	NONE	Q9NQZ8	ZBTB40	1	8.20768	retained
1534	ZNF563	KRAB-A	Q8TA94	ZBTB40	0	1.26157	retained
1535	ZNF768	NONE	Q9H5H4	ZBTB40	0.82	2.06317	retained
1536	ZNF189	KRAB-A	O75820	POGZ	0.41	1.48267	retained
1537	ZNF770	NONE	Q6IQ21	POGZ	0	1.23114	retained
1538	ZNF490	KRAB-A	Q9ULM2	POGZ	0	1.50285	retained
1539	ZNF140	KRAB-A	P52738	TP53BP1	0	1.16706	retained
1540	ZFP28	KRAB-A	Q8NHY6	TP53BP1	1	5.6815	retained
1541	FEZF1	NONE	A0PJY2	TP53BP1	0.48	1.57102	retained
1542	MZF1	SCAN	P28698	TP53BP1	0	1.39717	retained
1543	ZNF549	KRAB-A	Q6P9A3	TP53BP1	0	1.18901	retained
1544	MAZ	NONE	P56270	TP53BP1	0.5	1.79087	retained
1545	ZNF257	KRAB-A	Q9Y2Q1	TP53BP1	0.41	1.74525	retained
1546	ZNF778	KRAB-A	Q96MU6	TP53BP1	0	1.1368	retained
1547	ZNF595	KRAB-A	Q8IYB9	TP53BP1	0	1.15892	retained
1548	ZNF563	KRAB-A	Q8TA94	TP53BP1	0.99	2.74972	retained
1549	ZNF816	KRAB-A	Q0VGE8	TP53BP1	0.5	3.69991	retained
1550	ZNF667	KRAB-A	Q5HYK9	TP53BP1	0.48	1.82154	retained
1551	ZNF214	KRAB-A	Q9UL59	KHDRBS1	0	0.554722	frequent_flier
1552	ZNF331	KRAB-A	Q9NQX6	KHDRBS1	0	0.552901	frequent_flier
1553	ZNF250	KRAB-A	P15622	KHDRBS1	0.28	0.889327	frequent_flier
1554	GLIS1	NONE	Q8NBF1	KHDRBS1	0	0.691496	frequent_flier
1555	ZNF595	KRAB-A	Q8IYB9	KHDRBS1	0	0.441673	frequent_flier
1556	ZSCAN5C	SCAN	A6NGD5	KHDRBS1	0	0.464757	frequent_flier
1557	ZFP28	KRAB-A	Q8NHY6	KHDRBS1	0	0.297946	frequent_flier
1558	SCRT1	SNAG	Q9BWW7	KHDRBS1	0.05	0.819573	frequent_flier
1559	ZNF667	KRAB-A	Q5HYK9	KHDRBS1	0	0.44489	frequent_flier
1560	ZNF594	NONE	Q96JF6	KHDRBS1	0	0.557308	frequent_flier
1561	ZNF490	KRAB-A	Q9ULM2	KHDRBS1	0	0.600584	frequent_flier
1562	ZNF16	NONE	P17020	KHDRBS1	0	0.510504	frequent_flier
1563	ZNF71	NONE	Q9NQZ8	KHDRBS1	0.01	0.575137	frequent_flier
1564	ZNF816	KRAB-A	Q0VGE8	KHDRBS1	0	0.535335	frequent_flier
1565	IKZF3	NONE	Q9UKT9	KHDRBS1	0.26	0.830462	frequent_flier
1566	ZNF708	KRAB-A	P17019	KHDRBS1	0	0.536384	frequent_flier
1567	FEZF1	NONE	A0PJY2	KHDRBS1	0	0.639123	frequent_flier
1568	MZF1	SCAN	P28698	KHDRBS1	0	0.569995	frequent_flier
1569	ZBTB14	BTB	O43829	KHDRBS1	0	0.507052	frequent_flier
1570	ZNF18	KRAB-A;SCAN	P17022	KHDRBS1	0	0.575503	frequent_flier
1571	ZBTB42	BTB	B2RXF5	KHDRBS1	0	0.424985	frequent_flier
1572	ZNF8	KRAB-A	P17098	KHDRBS1	0	0.770889	frequent_flier
1573	ZFP3	NONE	Q96NJ6	KHDRBS1	0	0.588636	frequent_flier
1574	KLF7	NONE	O75840	KHDRBS1	0	0.402683	frequent_flier
1575	ZNF669	KRAB-A	Q96BR6	KHDRBS1	0	0.767296	frequent_flier
1576	ZNF436	KRAB-A	Q9C0F3	KHDRBS1	0	0.542538	frequent_flier
1577	ZNF768	NONE	Q9H5H4	KHDRBS1	0.95	1.29996	frequent_flier
1578	KLF1	NONE	Q13351	KHDRBS1	0.41	0.770923	frequent_flier
1579	ZNF513	NONE	Q8N8E2	KHDRBS1	0.02	1.22585	frequent_flier
1580	ZIM3	KRAB-A	Q96PE6	KHDRBS1	0	0.881534	frequent_flier
1581	ZNF184	KRAB-A	Q99676	KHDRBS1	0	0.471866	frequent_flier
1582	ZNF692	NONE	Q9BU19	KHDRBS1	0	1.19201	frequent_flier
1583	ZNF320	KRAB-A	A2RRD8	KHDRBS1	0.09	1.04906	frequent_flier
1584	ZNF322	NONE	Q6U7Q0	KHDRBS1	0	0.468346	frequent_flier
1585	ZNF189	KRAB-A	O75820	KHDRBS1	0	0.469376	frequent_flier
1586	ZNF596	KRAB-A	Q8TC21	KHDRBS1	0	0.335419	frequent_flier
1587	ZNF329	NONE	Q86UD4	KHDRBS1	0	0.7564	frequent_flier
1588	OSR2	NONE	Q8N2R0	KHDRBS1	0	0.460228	frequent_flier
1589	ZNF582	KRAB-A	Q96NG8	KHDRBS1	0	0.417403	frequent_flier
1590	MYNN	BTB	Q9NPC7	KHDRBS1	0	0.757456	frequent_flier
1591	ZFP82	KRAB-A	Q8N141	KHDRBS1	0.05	0.61956	frequent_flier
1592	PATZ1	BTB	Q9HBE1	KHDRBS1	0	0.519261	frequent_flier
1593	ZNF610	KRAB-A	Q8N9Z0	KHDRBS1	0	0.402135	frequent_flier
1594	ZNF502	NONE	Q8TBZ5	KHDRBS1	0	0.584133	frequent_flier
1595	ZNF394	KRAB-A;SCAN	Q53GI3	KHDRBS1	0	0.576843	frequent_flier
1596	MAZ	NONE	P56270	KHDRBS1	1	1.96302	frequent_flier
1597	ZNF449	SCAN	Q6P9G9	KHDRBS1	0	0.34949	frequent_flier
1598	ZNF280A	NONE	P59817	KHDRBS1	0	0.599875	frequent_flier
1599	GTF3A	NONE	Q92664	KHDRBS1	0.28	0.919381	frequent_flier
1600	ZNF547	KRAB-A	Q8IVP9	KHDRBS1	0.02	0.720076	frequent_flier
1601	PRDM1	SET	O75626	KHDRBS1	0	0.482115	frequent_flier
1602	ZNF778	KRAB-A	Q96MU6	KHDRBS1	0	0.51459	frequent_flier
1603	ZNF419	KRAB-A	Q96HQ0	KHDRBS1	0	0.427756	frequent_flier
1604	ZNF37A	KRAB-A	P17032	KHDRBS1	0	0.712711	frequent_flier
1605	ZNF563	KRAB-A	Q8TA94	KHDRBS1	0	0.427966	frequent_flier
1606	ZNF770	NONE	Q6IQ21	KHDRBS1	0	0.494784	frequent_flier
1607	ZSCAN30	SCAN	Q86W11	KHDRBS1	0	0.496351	frequent_flier
1608	ZNF250	KRAB-A	P15622	DKC1	0.01	0.741088	frequent_flier
1609	ZSCAN5C	SCAN	A6NGD5	DKC1	0.01	0.713426	frequent_flier
1610	ZNF596	KRAB-A	Q8TC21	DKC1	0.01	0.728713	frequent_flier
1611	ZNF594	NONE	Q96JF6	DKC1	0.51	2.46079	frequent_flier
1612	ZNF595	KRAB-A	Q8IYB9	DKC1	0	0.626525	frequent_flier
1613	ZNF16	NONE	P17020	DKC1	0.03	1.03509	frequent_flier
1614	ZNF71	NONE	Q9NQZ8	DKC1	0.29	1.05716	frequent_flier
1615	IKZF3	NONE	Q9UKT9	DKC1	0.01	0.643477	frequent_flier
1616	ZNF140	KRAB-A	P52738	DKC1	0	0.652962	frequent_flier
1617	ZNF708	KRAB-A	P17019	DKC1	0.03	0.835533	frequent_flier
1618	FEZF1	NONE	A0PJY2	DKC1	0.23	1.20171	frequent_flier
1619	KLF7	NONE	O75840	DKC1	0.03	0.783913	frequent_flier
1620	ZNF436	KRAB-A	Q9C0F3	DKC1	0.51	1.24107	frequent_flier
1621	ZNF768	NONE	Q9H5H4	DKC1	0.06	0.910472	frequent_flier
1622	KLF1	NONE	Q13351	DKC1	0.03	0.68375	frequent_flier
1623	ZNF184	KRAB-A	Q99676	DKC1	0	0.906402	frequent_flier
1624	ZNF322	NONE	Q6U7Q0	DKC1	0.03	0.883515	frequent_flier
1625	ZNF189	KRAB-A	O75820	DKC1	0	0.439196	frequent_flier
1626	OSR2	NONE	Q8N2R0	DKC1	0.03	0.799702	frequent_flier
1627	MYNN	BTB	Q9NPC7	DKC1	0.84	2.1643	frequent_flier
1628	ZFP82	KRAB-A	Q8N141	DKC1	0.03	0.723855	frequent_flier
1629	PATZ1	BTB	Q9HBE1	DKC1	0.03	0.879726	frequent_flier
1630	MAZ	NONE	P56270	DKC1	0.59	3.03723	frequent_flier
1631	ZNF449	SCAN	Q6P9G9	DKC1	0.09	0.863911	frequent_flier
1632	GTF3A	NONE	Q92664	DKC1	0.03	0.760753	frequent_flier
1633	ZNF547	KRAB-A	Q8IVP9	DKC1	0.01	0.537814	frequent_flier
1634	PRDM1	SET	O75626	DKC1	0.68	1.63004	frequent_flier
1635	SCRT1	SNAG	Q9BWW7	DKC1	0.98	2.38951	frequent_flier
1636	ZNF563	KRAB-A	Q8TA94	DKC1	0.01	0.697614	frequent_flier
1637	ZNF770	NONE	Q6IQ21	DKC1	0.01	0.604283	frequent_flier
1638	ZSCAN30	SCAN	Q86W11	DKC1	0.68	1.4168	frequent_flier
1639	ZNF331	KRAB-A	Q9NQX6	PNMA2	1	5.76349	retained
1640	ZNF250	KRAB-A	P15622	PNMA2	0.95	2.16137	retained
1641	ZNF692	NONE	Q9BU19	PNMA2	0.95	2.15061	retained
1642	ZNF595	KRAB-A	Q8IYB9	PNMA2	0	1.06592	retained
1643	ZNF34	KRAB-A	Q8IZ26	PNMA2	0	1.27223	retained
1644	ZNF490	KRAB-A	Q9ULM2	PNMA2	0	1.25782	retained
1645	ZNF16	NONE	P17020	PNMA2	0	1.02701	retained
1646	ZNF71	NONE	Q9NQZ8	PNMA2	0.45	1.27623	retained
1647	ZNF816	KRAB-A	Q0VGE8	PNMA2	0	1.10962	retained
1648	ZSCAN5C	SCAN	A6NGD5	PNMA2	0.95	1.73142	retained
1649	ZNF140	KRAB-A	P52738	PNMA2	0	1.07977	retained
1650	ZNF708	KRAB-A	P17019	PNMA2	0.95	1.75627	retained
1651	FEZF1	NONE	A0PJY2	PNMA2	0.95	1.80224	retained
1652	MZF1	SCAN	P28698	PNMA2	0.91	1.72715	retained
1653	KLF1	NONE	Q13351	PNMA2	0.45	1.05915	retained
1654	ZBTB42	BTB	B2RXF5	PNMA2	0.45	1.23101	retained
1655	KLF7	NONE	O75840	PNMA2	0	0.925639	retained
1656	ZNF436	KRAB-A	Q9C0F3	PNMA2	0	0.901126	retained
1657	ZNF768	NONE	Q9H5H4	PNMA2	1	2.73997	retained
1658	ZNF419	KRAB-A	Q96HQ0	PNMA2	0.91	1.54513	retained
1659	ZNF418	KRAB-A	Q8TF45	PNMA2	0.5	2.01673	retained
1660	ZNF513	NONE	Q8N8E2	PNMA2	0.45	1.54363	retained
1661	ZIM3	KRAB-A	Q96PE6	PNMA2	0.45	1.3938	retained
1662	ZNF184	KRAB-A	Q99676	PNMA2	0	1.12357	retained
1663	ZFP28	KRAB-A	Q8NHY6	PNMA2	0	1.23066	retained
1664	ZNF320	KRAB-A	A2RRD8	PNMA2	0.95	2.47997	retained
1665	ZNF189	KRAB-A	O75820	PNMA2	0.95	1.73688	retained
1666	ZFP82	KRAB-A	Q8N141	PNMA2	1	3.74136	retained
1667	ZNF610	KRAB-A	Q8N9Z0	PNMA2	0	1.08899	retained
1668	GTF3A	NONE	Q92664	PNMA2	0.95	1.77561	retained
1669	ZNF547	KRAB-A	Q8IVP9	PNMA2	0.45	1.14299	retained
1670	ZNF778	KRAB-A	Q96MU6	PNMA2	0	1.02908	retained
1671	ZNF667	KRAB-A	Q5HYK9	PNMA2	0.5	1.41061	retained
1672	ZNF549	KRAB-A	Q6P9A3	PNMA2	0.5	1.83037	retained
1673	ZNF770	NONE	Q6IQ21	PNMA2	0.5	1.61375	retained
1674	ZNF214	KRAB-A	Q9UL59	ZNF227	0	1.2377	retained
1675	ZFP28	KRAB-A	Q8NHY6	ZNF227	0.45	1.698	retained
1676	ZFP82	KRAB-A	Q8N141	ZNF227	0	1.16387	retained
1677	ZNF490	KRAB-A	Q9ULM2	ZNF227	0	1.19965	retained
1678	ZNF669	KRAB-A	Q96BR6	ZNF227	1	2.7922	retained
1679	ZNF547	KRAB-A	Q8IVP9	ZNF227	0.95	2.15369	retained
1680	ZNF708	KRAB-A	P17019	ZNF227	0	1.16704	retained
1681	ZNF419	KRAB-A	Q96HQ0	ZNF227	0.91	1.907	retained
1682	ZNF418	KRAB-A	Q8TF45	ZNF227	0.5	1.99329	retained
1683	ZNF37A	KRAB-A	P17032	ZNF227	0.95	2.27822	retained
1684	FEZF1	NONE	A0PJY2	TOP2B	0	0.780869	retained
1685	ZNF189	KRAB-A	O75820	TOP2B	0	1.04737	retained
1686	ZNF449	SCAN	Q6P9G9	TOP2B	0.02	1.34912	retained
1687	OSR2	NONE	Q8N2R0	TOP2B	0	1.0368	retained
1688	KLF7	NONE	O75840	TOP2B	0	0.870877	retained
1689	SCRT1	SNAG	Q9BWW7	TOP2B	0	0.815082	retained
1690	ZNF768	NONE	Q9H5H4	TOP2B	0	0.73759	retained
1691	ZNF778	KRAB-A	Q96MU6	TOP2B	0.01	1.40187	retained
1692	ZFP82	KRAB-A	Q8N141	TOP2B	0	0.895031	retained
1693	ZNF549	KRAB-A	Q6P9A3	TOP2B	0	0.991688	retained
1694	ZNF770	NONE	Q6IQ21	TOP2B	0	0.795957	retained
1695	PRDM1	SET	O75626	TOP2B	0	0.786191	retained
1696	ZNF610	KRAB-A	Q8N9Z0	SQSTM1	0	1.20042	retained
1697	ZNF189	KRAB-A	O75820	SQSTM1	0	1.37143	retained
1698	GLIS1	NONE	Q8NBF1	SQSTM1	0.5	1.65154	retained
1699	ZNF329	NONE	Q86UD4	SQSTM1	0	1.18069	retained
1700	ZBTB42	BTB	B2RXF5	SQSTM1	0.45	1.66412	retained
1701	ZNF778	KRAB-A	Q96MU6	SQSTM1	0	1.17421	retained
1702	ZNF513	NONE	Q8N8E2	SQSTM1	0	1.45252	retained
1703	ZNF770	NONE	Q6IQ21	SQSTM1	0	1.15403	retained
1704	ZNF667	KRAB-A	Q5HYK9	SQSTM1	0.95	2.13842	retained
1705	ZNF610	KRAB-A	Q8N9Z0	TP73	0.91	1.97889	retained
1706	ZFP28	KRAB-A	Q8NHY6	TP73	0	1.43021	retained
1707	ZNF214	KRAB-A	Q9UL59	TP73	0	1.49433	retained
1708	ZNF189	KRAB-A	O75820	TP73	0	1.3904	retained
1709	OSR2	NONE	Q8N2R0	TP73	1	2.6023	retained
1710	ZNF778	KRAB-A	Q96MU6	TP73	0	1.18535	retained
1711	ZNF816	KRAB-A	Q0VGE8	TP73	0	1.2163	retained
1712	ZNF667	KRAB-A	Q5HYK9	TP73	0	1.16918	retained
1713	ZNF610	KRAB-A	Q8N9Z0	ADNP	0.16	1.64855	retained
1714	ZNF708	KRAB-A	P17019	ADNP	0	1.05991	retained
1715	MZF1	SCAN	P28698	ADNP	0.16	1.37507	retained
1716	ZNF189	KRAB-A	O75820	ADNP	0.33	1.72274	retained
1717	ZBTB42	BTB	B2RXF5	ADNP	0	1.10693	retained
1718	ZNF436	KRAB-A	Q9C0F3	ADNP	0	1.02389	retained
1719	ZNF778	KRAB-A	Q96MU6	ADNP	0.16	1.5908	retained
1720	ZNF418	KRAB-A	Q8TF45	ADNP	0	1.15789	retained
1721	ZNF16	NONE	P17020	ADNP	0.41	2.06247	retained
1722	ZNF816	KRAB-A	Q0VGE8	ADNP	0	1.17058	retained
1723	ZNF770	NONE	Q6IQ21	ADNP	0.16	1.54737	retained
1724	ZNF667	KRAB-A	Q5HYK9	ADNP	0	1.32046	retained
1725	ZNF324	KRAB-A	O75467	RIPK4	0	1.2476	retained
1726	ZBTB14	BTB	O43829	RIPK4	0	1.09392	retained
1727	ZNF449	SCAN	Q6P9G9	RIPK4	0.25	1.30847	retained
1728	ZNF71	NONE	Q9NQZ8	RIPK4	0	0.990881	retained
1729	ZNF563	KRAB-A	Q8TA94	RIPK4	0	1.05812	retained
1730	ZIM3	KRAB-A	Q96PE6	RIPK4	0	1.18619	retained
1731	ZNF214	KRAB-A	Q9UL59	PSMD3	0	1.3477	retained
1732	ZNF594	NONE	Q96JF6	PSMD3	0	1.01614	retained
1733	ZSCAN5C	SCAN	A6NGD5	PSMD3	0	0.840088	retained
1734	ZNF692	NONE	Q9BU19	PSMD3	0	1.35984	retained
1735	ZNF329	NONE	Q86UD4	PSMD3	0.01	1.58566	retained
1736	ZNF770	NONE	Q6IQ21	PSMD3	0	1.08908	retained
1737	ZNF257	KRAB-A	Q9Y2Q1	PSMD3	0.01	1.88125	retained
1738	ZNF449	SCAN	Q6P9G9	PSMD3	0	0.922905	retained
1739	ZNF669	KRAB-A	Q96BR6	PSMD3	0	1.522	retained
1740	ZNF768	NONE	Q9H5H4	PSMD3	0	0.845794	retained
1741	ZNF596	KRAB-A	Q8TC21	PSMD3	0	0.909423	retained
1742	ZNF280A	NONE	P59817	PSMD3	0	1.1647	retained
1743	KLF1	NONE	Q13351	PSMD3	0	1.09605	retained
1744	ZFP82	KRAB-A	Q8N141	PSMD3	0.01	1.74529	retained
1745	ZNF18	KRAB-A;SCAN	P17022	PSMD3	0	1.02679	retained
1746	ZNF394	KRAB-A;SCAN	Q53GI3	PSMD3	0	1.12109	retained
1747	ZNF816	KRAB-A	Q0VGE8	PSMD3	0	1.05195	retained
1748	IKZF3	NONE	Q9UKT9	PSMD3	0	0.964524	retained
1749	ZNF667	KRAB-A	Q5HYK9	PSMD3	0	1.0954	retained
1750	ZNF322	NONE	Q6U7Q0	UBXN4	0	1.26124	retained
1751	ZNF770	NONE	Q6IQ21	MIB1	0	1.51102	retained
1752	ZNF280A	NONE	P59817	UPF2	1	5.31537	retained
1753	ZNF250	KRAB-A	P15622	CTSB	0.36	1.2881	retained
1754	ZNF34	KRAB-A	Q8IZ26	CTSB	0.36	1.50258	retained
1755	ZNF490	KRAB-A	Q9ULM2	CTSB	0.18	1.28414	retained
1756	ZNF71	NONE	Q9NQZ8	CTSB	1	2.70977	retained
1757	ZNF140	KRAB-A	P52738	CTSB	0	0.961014	retained
1758	ZNF708	KRAB-A	P17019	CTSB	0.65	1.62038	retained
1759	FEZF1	NONE	A0PJY2	CTSB	0.73	1.68536	retained
1760	MZF1	SCAN	P28698	CTSB	0.18	1.12216	retained
1761	ZNF8	KRAB-A	P17098	CTSB	0.18	1.19569	retained
1762	KLF7	NONE	O75840	CTSB	0	0.756329	retained
1763	ZNF669	KRAB-A	Q96BR6	CTSB	0.99	3.41627	retained
1764	ZNF768	NONE	Q9H5H4	CTSB	1	2.58656	retained
1765	KLF1	NONE	Q13351	CTSB	0	0.694577	retained
1766	ZFP28	KRAB-A	Q8NHY6	CTSB	0.18	1.05574	retained
1767	ZNF320	KRAB-A	A2RRD8	CTSB	0.73	1.74664	retained
1768	ZNF322	NONE	Q6U7Q0	CTSB	0	0.811877	retained
1769	OSR2	NONE	Q8N2R0	CTSB	0.18	1.09072	retained
1770	ZNF582	KRAB-A	Q96NG8	CTSB	0.18	1.40589	retained
1771	MYNN	BTB	Q9NPC7	CTSB	0.36	1.39041	retained
1772	ZFP82	KRAB-A	Q8N141	CTSB	0.98	2.25902	retained
1773	ZNF394	KRAB-A;SCAN	Q53GI3	CTSB	0	1.31718	retained
1774	MAZ	NONE	P56270	CTSB	0	0.799928	retained
1775	ZNF547	KRAB-A	Q8IVP9	CTSB	0.86	1.93325	retained
1776	ZNF778	KRAB-A	Q96MU6	CTSB	0	0.889779	retained
1777	ZNF563	KRAB-A	Q8TA94	CTSB	0.18	0.998421	retained
1778	ZNF214	KRAB-A	Q9UL59	DNAJB6	0.39	1.71326	retained
1779	ZNF331	KRAB-A	Q9NQX6	DNAJB6	0	0.825742	retained
1780	ZNF595	KRAB-A	Q8IYB9	DNAJB6	0.32	1.66391	retained
1781	ZNF34	KRAB-A	Q8IZ26	DNAJB6	0.09	1.24596	retained
1782	ZNF596	KRAB-A	Q8TC21	DNAJB6	0	0.796428	retained
1783	ZNF490	KRAB-A	Q9ULM2	DNAJB6	0.18	1.40289	retained
1784	ZNF16	NONE	P17020	DNAJB6	0	0.841649	retained
1785	ZNF816	KRAB-A	Q0VGE8	DNAJB6	0.86	2.61531	retained
1786	ZNF140	KRAB-A	P52738	DNAJB6	0.09	1.31231	retained
1787	ZNF708	KRAB-A	P17019	DNAJB6	0.39	1.36085	retained
1788	MZF1	SCAN	P28698	DNAJB6	0	0.882825	retained
1789	ZBTB42	BTB	B2RXF5	DNAJB6	0.46	1.70106	retained
1790	KLF7	NONE	O75840	DNAJB6	0.89	2.2038	retained
1791	ZNF669	KRAB-A	Q96BR6	DNAJB6	0	0.989658	retained
1792	ZNF436	KRAB-A	Q9C0F3	DNAJB6	0.32	1.24903	retained
1793	ZNF419	KRAB-A	Q96HQ0	DNAJB6	0	0.728298	retained
1794	ZNF418	KRAB-A	Q8TF45	DNAJB6	0.32	1.73439	retained
1795	ZNF513	NONE	Q8N8E2	DNAJB6	0.09	1.32037	retained
1796	ZNF667	KRAB-A	Q5HYK9	DNAJB6	0.96	2.46689	retained
1797	ZNF184	KRAB-A	Q99676	DNAJB6	0.09	1.20275	retained
1798	ZFP28	KRAB-A	Q8NHY6	DNAJB6	0.97	2.75107	retained
1799	ZBTB6	BTB	Q15916	DNAJB6	0.32	1.93311	retained
1800	ZNF189	KRAB-A	O75820	DNAJB6	0.56	1.64283	retained
1801	OSR2	NONE	Q8N2R0	DNAJB6	1	4.20713	retained
1802	ZNF582	KRAB-A	Q96NG8	DNAJB6	0.09	1.1505	retained
1803	ZFP82	KRAB-A	Q8N141	DNAJB6	0.7	1.8041	retained
1804	ZNF610	KRAB-A	Q8N9Z0	DNAJB6	0.94	2.72414	retained
1805	ZNF547	KRAB-A	Q8IVP9	DNAJB6	0.09	0.881455	retained
1806	ZNF778	KRAB-A	Q96MU6	DNAJB6	0.86	2.28	retained
1807	ZNF37A	KRAB-A	P17032	DNAJB6	0.96	3.16161	retained
1808	ZNF549	KRAB-A	Q6P9A3	DNAJB6	0.7	2.44373	retained
1809	ZNF770	NONE	Q6IQ21	DNAJB6	0.48	1.61595	retained
1810	ZNF214	KRAB-A	Q9UL59	CCAR2	0	0.804817	retained
1811	ZNF250	KRAB-A	P15622	CCAR2	0.08	0.884969	retained
1812	ZNF34	KRAB-A	Q8IZ26	CCAR2	0.97	3.1182	retained
1813	ZNF596	KRAB-A	Q8TC21	CCAR2	0	0.693501	retained
1814	ZNF594	NONE	Q96JF6	CCAR2	0.08	0.847034	retained
1815	ZNF490	KRAB-A	Q9ULM2	CCAR2	0.17	1.83849	retained
1816	ZNF71	NONE	Q9NQZ8	CCAR2	1	2.72701	retained
1817	ZNF816	KRAB-A	Q0VGE8	CCAR2	0	0.982914	retained
1818	IKZF3	NONE	Q9UKT9	CCAR2	0	0.607797	retained
1819	ZBTB6	BTB	Q15916	CCAR2	0	1.14373	retained
1820	ZNF140	KRAB-A	P52738	CCAR2	0	0.893467	retained
1821	ZNF708	KRAB-A	P17019	CCAR2	0.01	0.974086	retained
1822	FEZF1	NONE	A0PJY2	CCAR2	0.5	1.62913	retained
1823	MZF1	SCAN	P28698	CCAR2	0	1.0742	retained
1824	ZNF547	KRAB-A	Q8IVP9	CCAR2	0.37	1.49178	retained
1825	SCRT1	SNAG	Q9BWW7	CCAR2	0	0.493379	retained
1826	KLF7	NONE	O75840	CCAR2	0	0.401092	retained
1827	ZNF436	KRAB-A	Q9C0F3	CCAR2	0.03	0.773942	retained
1828	ZNF768	NONE	Q9H5H4	CCAR2	0.98	2.37327	retained
1829	KLF1	NONE	Q13351	CCAR2	0.2	0.941121	retained
1830	ZSCAN5C	SCAN	A6NGD5	CCAR2	0	0.675694	retained
1831	ZNF513	NONE	Q8N8E2	CCAR2	0	0.634199	retained
1832	ZNF667	KRAB-A	Q5HYK9	CCAR2	0.37	1.70306	retained
1833	ZFP28	KRAB-A	Q8NHY6	CCAR2	0	0.844475	retained
1834	ZNF320	KRAB-A	A2RRD8	CCAR2	0	1.01008	retained
1835	ZNF322	NONE	Q6U7Q0	CCAR2	0	0.64631	retained
1836	ZNF329	NONE	Q86UD4	CCAR2	0.03	1.03783	retained
1837	ZNF189	KRAB-A	O75820	CCAR2	0.11	1.29985	retained
1838	OSR2	NONE	Q8N2R0	CCAR2	1	2.67042	retained
1839	ZNF582	KRAB-A	Q96NG8	CCAR2	0	1.08549	retained
1840	ZFP82	KRAB-A	Q8N141	CCAR2	0.99	2.99939	retained
1841	PATZ1	BTB	Q9HBE1	CCAR2	0	0.547526	retained
1842	ZNF549	KRAB-A	Q6P9A3	CCAR2	0	0.708983	retained
1843	ZNF610	KRAB-A	Q8N9Z0	CCAR2	0.03	1.60543	retained
1844	ZNF563	KRAB-A	Q8TA94	CCAR2	0	0.761822	retained
1845	MAZ	NONE	P56270	CCAR2	0.5	1.47424	retained
1846	ZNF449	SCAN	Q6P9G9	CCAR2	0	0.929796	retained
1847	GTF3A	NONE	Q92664	CCAR2	0	0.628189	retained
1848	ZBTB42	BTB	B2RXF5	CCAR2	0.64	2.16105	retained
1849	PRDM1	SET	O75626	CCAR2	0	0.464247	retained
1850	ZNF778	KRAB-A	Q96MU6	CCAR2	0.09	1.45086	retained
1851	ZNF419	KRAB-A	Q96HQ0	CCAR2	0	0.421492	retained
1852	ZNF394	KRAB-A;SCAN	Q53GI3	CCAR2	0	1.52672	retained
1853	ZNF770	NONE	Q6IQ21	CCAR2	0.17	1.58133	retained
1854	ZSCAN30	SCAN	Q86W11	CCAR2	0	0.487248	retained
1855	ZFP82	KRAB-A	Q8N141	MRPS34	0.45	1.43097	non_nuclear
1856	ZNF768	NONE	Q9H5H4	MRPS34	1	2.43346	non_nuclear
1857	ZNF419	KRAB-A	Q96HQ0	MRPS34	0	1.18103	non_nuclear
1858	ZNF418	KRAB-A	Q8TF45	MRPS34	0.45	1.48626	non_nuclear
1859	ZNF16	NONE	P17020	MRPS34	1	3.51645	non_nuclear
1860	ZNF71	NONE	Q9NQZ8	MRPS34	0.45	1.41131	non_nuclear
1861	ZNF667	KRAB-A	Q5HYK9	MRPS34	0	1.19624	non_nuclear
1862	KLF7	NONE	O75840	MRPS6	0	1.211	non_nuclear
1863	ZNF16	NONE	P17020	MRPS6	0.97	2.53997	non_nuclear
1864	ZNF184	KRAB-A	Q99676	MRPS9	0	1.22469	retained
1865	ZNF418	KRAB-A	Q8TF45	MRPS9	0.42	1.98647	retained
1866	ZNF189	KRAB-A	O75820	MRPS9	0	1.15478	retained
1867	ZNF768	NONE	Q9H5H4	MRPS9	0.5	1.89205	retained
1868	ZFP82	KRAB-A	Q8N141	MRPS9	0	1.15584	retained
1869	ZNF16	NONE	P17020	MRPS9	1	5.23543	retained
1870	ZNF71	NONE	Q9NQZ8	MRPS9	0.25	1.61818	retained
1871	ZNF770	NONE	Q6IQ21	MRPS9	0	1.17408	retained
1872	ZNF667	KRAB-A	Q5HYK9	MRPS9	0	1.4256	retained
1873	ZNF563	KRAB-A	Q8TA94	DDX20	1	5.18167	retained
1874	ZNF768	NONE	Q9H5H4	DDX20	0	1.23228	retained
1875	ZNF490	KRAB-A	Q9ULM2	ANKS3	0	1.26356	retained
1876	KLF7	NONE	O75840	TPX2	0	1.35349	retained
1877	ZNF547	KRAB-A	Q8IVP9	TPX2	0.41	1.36452	retained
1878	ZNF708	KRAB-A	P17019	TPX2	0	1.129	retained
1879	PRDM1	SET	O75626	TPX2	0.9	2.11571	retained
1880	MAZ	NONE	P56270	ZSCAN18	0	1.24363	retained
1881	ZNF71	NONE	Q9NQZ8	ZSCAN18	0.45	1.49861	retained
1882	ZNF18	KRAB-A;SCAN	P17022	ZSCAN18	1	2.85725	retained
1883	ZNF449	SCAN	Q6P9G9	ZSCAN18	1	6.28683	retained
1884	MZF1	SCAN	P28698	ZSCAN18	1	13.7633	retained
1885	GTF3A	NONE	Q92664	PSMC5	0	1.00807	retained
1886	ZNF708	KRAB-A	P17019	PSMC5	0.75	3.12038	retained
1887	ZNF320	KRAB-A	A2RRD8	PSMC5	0.01	1.26202	retained
1888	ZFP28	KRAB-A	Q8NHY6	PSMC5	0	1.05651	retained
1889	ZNF322	NONE	Q6U7Q0	PSMC5	0	1.01708	retained
1890	ZNF189	KRAB-A	O75820	PSMC5	0.01	1.40979	retained
1891	ZNF816	KRAB-A	Q0VGE8	PSMC5	0	1.13768	retained
1892	KLF7	NONE	O75840	PSMC5	0	0.977463	retained
1893	ZBTB42	BTB	B2RXF5	PSMC5	0.01	1.50571	retained
1894	ZNF436	KRAB-A	Q9C0F3	PSMC5	0	0.955388	retained
1895	ZNF18	KRAB-A;SCAN	P17022	PSMC5	0.01	1.35916	retained
1896	ZNF768	NONE	Q9H5H4	PSMC5	0.01	1.20175	retained
1897	ZNF594	NONE	Q96JF6	PSMC5	0.01	1.19456	retained
1898	ZFP82	KRAB-A	Q8N141	PSMC5	0.59	2.88744	retained
1899	ZNF513	NONE	Q8N8E2	PSMC5	0	1.1154	retained
1900	ZNF667	KRAB-A	Q5HYK9	PSMC5	0	1.03461	retained
1901	ZNF778	KRAB-A	Q96MU6	PSMC5	0	1.06871	retained
1902	IKZF3	NONE	Q9UKT9	PSMC5	0.01	1.15386	retained
1903	FEZF1	NONE	A0PJY2	PSMC5	0	1.23766	retained
1904	ZNF250	KRAB-A	P15622	ZFP30	1	5.64839	retained
1905	ZNF436	KRAB-A	Q9C0F3	ZFP30	0.41	1.47389	retained
1906	ZNF418	KRAB-A	Q8TF45	ZFP30	0	1.2474	retained
1907	ZNF669	KRAB-A	Q96BR6	ZFP30	0	1.51773	retained
1908	ZNF513	NONE	Q8N8E2	ARVCF	0	1.26498	non_nuclear
1909	ZNF214	KRAB-A	Q9UL59	CENPB	0.41	1.63951	retained
1910	ZNF331	KRAB-A	Q9NQX6	CENPB	1	3.57444	retained
1911	ZNF595	KRAB-A	Q8IYB9	CENPB	0.9	1.95794	retained
1912	ZNF34	KRAB-A	Q8IZ26	CENPB	0.41	1.2627	retained
1913	ZNF596	KRAB-A	Q8TC21	CENPB	0.91	2.03262	retained
1914	ZNF490	KRAB-A	Q9ULM2	CENPB	0	1.02926	retained
1915	ZNF16	NONE	P17020	CENPB	1	4.04756	retained
1916	ZNF816	KRAB-A	Q0VGE8	CENPB	0.9	2.04124	retained
1917	ZNF140	KRAB-A	P52738	CENPB	0.82	1.75644	retained
1918	ZNF708	KRAB-A	P17019	CENPB	1	4.33077	retained
1919	FEZF1	NONE	A0PJY2	CENPB	0	0.964601	retained
1920	ZNF419	KRAB-A	Q96HQ0	CENPB	0.9	1.72633	retained
1921	ZNF418	KRAB-A	Q8TF45	CENPB	0.91	2.23461	retained
1922	ZNF667	KRAB-A	Q5HYK9	CENPB	0.41	1.39723	retained
1923	ZNF184	KRAB-A	Q99676	CENPB	0	1.11798	retained
1924	ZFP28	KRAB-A	Q8NHY6	CENPB	0.98	2.28878	retained
1925	ZBTB6	BTB	Q15916	CENPB	0.41	1.39415	retained
1926	ZNF189	KRAB-A	O75820	CENPB	0	1.12574	retained
1927	OSR2	NONE	Q8N2R0	CENPB	0	0.922501	retained
1928	ZNF582	KRAB-A	Q96NG8	CENPB	0	1.32264	retained
1929	ZFP82	KRAB-A	Q8N141	CENPB	0.82	1.52433	retained
1930	ZNF610	KRAB-A	Q8N9Z0	CENPB	0	1.08229	retained
1931	ZNF549	KRAB-A	Q6P9A3	CENPB	0	1.34842	retained
1932	ZNF449	SCAN	Q6P9G9	CENPB	0	0.997187	retained
1933	GTF3A	NONE	Q92664	CENPB	0.41	1.35343	retained
1934	ZNF778	KRAB-A	Q96MU6	CENPB	0	1.02067	retained
1935	ZIM3	KRAB-A	Q96PE6	CENPB	0.5	1.87449	retained
1936	ZNF563	KRAB-A	Q8TA94	CENPB	0	1.17546	retained
1937	ZNF770	NONE	Q6IQ21	CENPB	0.82	1.59821	retained
1938	FEZF1	NONE	A0PJY2	SRP19	0	1.1418	retained
1939	ZBTB14	BTB	O43829	SRP19	1	3.39769	retained
1940	MAZ	NONE	P56270	SRP19	0.5	1.85801	retained
1941	ZNF768	NONE	Q9H5H4	SRP19	0.91	2.3189	retained
1942	MYNN	BTB	Q9NPC7	SRP19	0.41	1.39921	retained
1943	ZFP82	KRAB-A	Q8N141	SRP19	0.9	2.08051	retained
1944	ZNF71	NONE	Q9NQZ8	SRP19	0.91	2.26824	retained
1945	ZSCAN5C	SCAN	A6NGD5	SRP19	0	1.36024	retained
1946	ZSCAN30	SCAN	Q86W11	SRP19	0.41	1.35396	retained
1947	ZNF320	KRAB-A	A2RRD8	LRRC1	0.98	2.71082	non_nuclear
1948	ZNF547	KRAB-A	Q8IVP9	LRRC1	0.5	1.91963	non_nuclear
1949	ZNF596	KRAB-A	Q8TC21	LRRC1	0.41	1.44407	non_nuclear
1950	ZNF768	NONE	Q9H5H4	LRRC1	1	4.15883	non_nuclear
1951	ZNF595	KRAB-A	Q8IYB9	LRRC1	0	1.2142	non_nuclear
1952	ZNF513	NONE	Q8N8E2	LRRC1	0.41	1.47861	non_nuclear
1953	ZNF563	KRAB-A	Q8TA94	LRRC1	1	9.24448	non_nuclear
1954	ZSCAN5C	SCAN	A6NGD5	LRRC1	0.5	2.1641	non_nuclear
1955	ZNF184	KRAB-A	Q99676	MRPS28	0	1.23141	non_nuclear
1956	ZNF16	NONE	P17020	MRPS28	0.68	2.22293	non_nuclear
1957	ZNF71	NONE	Q9NQZ8	MRPS28	0.42	1.64489	non_nuclear
1958	ZNF768	NONE	Q9H5H4	MRPS28	0.25	1.66966	non_nuclear
1959	ZNF418	KRAB-A	Q8TF45	MRPS28	0	1.48114	non_nuclear
1960	ZNF16	NONE	P17020	MRPS2	1	4.15122	non_nuclear
1961	ZNF418	KRAB-A	Q8TF45	MRPS2	0	1.2518	non_nuclear
1962	ZNF708	KRAB-A	P17019	PDCD2L	0.48	1.48147	non_nuclear
1963	GLIS1	NONE	Q8NBF1	PDCD2L	0	1.15919	non_nuclear
1964	FEZF1	NONE	A0PJY2	PDCD2L	0	0.931942	non_nuclear
1965	MZF1	SCAN	P28698	PDCD2L	0.41	1.23801	non_nuclear
1966	ZBTB14	BTB	O43829	PDCD2L	0	0.988022	non_nuclear
1967	ZNF250	KRAB-A	P15622	PDCD2L	0.41	1.09806	non_nuclear
1968	ZNF692	NONE	Q9BU19	PDCD2L	0.41	1.38681	non_nuclear
1969	OSR2	NONE	Q8N2R0	PDCD2L	0	0.887123	non_nuclear
1970	GTF3A	NONE	Q92664	PDCD2L	0.82	1.5001	non_nuclear
1971	ZBTB42	BTB	B2RXF5	PDCD2L	0	0.977038	non_nuclear
1972	ZNF436	KRAB-A	Q9C0F3	PDCD2L	0.41	1.03383	non_nuclear
1973	ZNF419	KRAB-A	Q96HQ0	PDCD2L	0	0.898594	non_nuclear
1974	ZNF490	KRAB-A	Q9ULM2	PDCD2L	0.41	1.42712	non_nuclear
1975	ZNF513	NONE	Q8N8E2	PDCD2L	0	1.05313	non_nuclear
1976	ZNF71	NONE	Q9NQZ8	PDCD2L	0.91	1.74638	non_nuclear
1977	ZNF778	KRAB-A	Q96MU6	PDCD2L	0	1.20307	non_nuclear
1978	ZSCAN5C	SCAN	A6NGD5	PDCD2L	0	0.890295	non_nuclear
1979	ZIM3	KRAB-A	Q96PE6	PDCD2L	0	1.12871	non_nuclear
1980	ZNF184	KRAB-A	Q99676	PTCD3	0	1.2348	non_nuclear
1981	ZNF16	NONE	P17020	PTCD3	1	6.3383	non_nuclear
1982	ZNF71	NONE	Q9NQZ8	PTCD3	0	1.16405	non_nuclear
1983	ZNF418	KRAB-A	Q8TF45	PTCD3	0.48	2.00705	non_nuclear
1984	IKZF3	NONE	Q9UKT9	DNAJA3	0	0.631237	retained
1985	ZNF331	KRAB-A	Q9NQX6	DNAJA3	0	0.957195	retained
1986	ZNF34	KRAB-A	Q8IZ26	DNAJA3	0	1.01857	retained
1987	ZNF594	NONE	Q96JF6	DNAJA3	0	0.67758	retained
1988	ZNF490	KRAB-A	Q9ULM2	DNAJA3	0	0.821766	retained
1989	ZNF71	NONE	Q9NQZ8	DNAJA3	0.18	0.897095	retained
1990	ZSCAN5C	SCAN	A6NGD5	DNAJA3	0.36	1.11297	retained
1991	ZNF708	KRAB-A	P17019	DNAJA3	0.97	2.32634	retained
1992	FEZF1	NONE	A0PJY2	DNAJA3	0	0.730538	retained
1993	ZBTB14	BTB	O43829	DNAJA3	0	0.803322	retained
1994	ZNF8	KRAB-A	P17098	DNAJA3	0	0.917885	retained
1995	ZFP3	NONE	Q96NJ6	DNAJA3	0	0.861317	retained
1996	KLF7	NONE	O75840	DNAJA3	0.18	0.949655	retained
1997	ZNF669	KRAB-A	Q96BR6	DNAJA3	0	1.16611	retained
1998	ZNF436	KRAB-A	Q9C0F3	DNAJA3	0.33	1.04156	retained
[truncated: 9,583 more rows]

## Sheet: PPI Fold Change SPC Matrix
	KPNA4	H1F0	LMNA	LAS1L	DDX18	DIAPH1	RCOR1	TRIM27	RAB34	ECH1	ZNF805	MCM6	ZNF234	H1FX	ZMYM4	ZNF446	RBM42	SH3KBP1	MRPS26	NOL6	TRIO	GTF3C1	MRPS33	FBL	CTBP2	USP7	USP9X	ANKRD28	Q3KSP4	KPNA3	C19orf47	ESYT1	MKI67	NTPCR	TBC1D15	ZNF136	HMGA1	NOL9	TP53	HUWE1	ZKSCAN8	CASK	GTF3C2	C10orf2	SOGA1	PPP2R2A	STUB1	RAD18	YTHDC2
ZIM3	1.14022	0	0	0	0.711746	0	0	0	0	0	0	1.5058	0	0	0	0	0	0	0	1.20971	0	0	0	0.427949	0	2.61191	3.42205	0	0	3.50599	0	0	0	0	0	0	0	0	0.792258	0	0	5.19732	0	0	0	1.62467	0.67827	0	0
ZNF708	2.1133	0	0.522598	1.40382	0.947952	0	0	0	3.86789	0	1.25136	0.457789	0	0.422	0	0	0	0	0	2.54072	0	1.06643	0	0.58364	0	2.20791	4.96963	0	0	4.52005	0	5.45947	2.55097	1.64274	0	0	0.585209	1.72478	0.592303	1.92279	0	0	0	0	0	0.843481	0.778077	0	0
FEZF1	1.76651	0	0.555673	1.92812	1.21524	0	0	1.36813	0	0	0	1.4642	0	0.837099	0	0	0	0	0	2.8176	0	1.31425	0	0.981297	0	2.30169	5.8747	0	0	2.95936	0	5.15757	3.10565	1.17953	0	0	0.56058	1.98272	0.930619	6.85585	0	0	0	0	0	1.81938	1.07729	0	0
MAZ	0.940825	1.37617	2.02085	0	0.453934	1.24363	0	0	0	2.67592	0	3.1247	0	1.17551	0	0	1.67993	0	0	1.2771	0	0	0	0.757413	1.89109	1.10097	1.41336	0	0	0	0	1.47961	0.900711	0	0	0	1.09373	0	0.301578	0	0	1.18674	0	0	0	0.37561	0.478494	0	0
ZNF329	1.02759	0	0	1.50928	1.00428	0	0	0	0	0	0	0.634544	0	1.73132	0	0	0	0	0	1.67248	0	0	0	0.515411	0	0	6.61555	0	1.72771	0	0	0	1.67255	0	0	0	0.707854	0	1.64858	0	0	0	0	0	0	2.07782	0	0	1.25064
OSR2	1.29961	0	0	1.07977	0	0	0	0	0	0	0	0.377901	0	0	0	0	0	0	0	2.32167	0	0	0	0.682089	0	1.20765	1.77301	0	1.92769	0	0	1.25332	1.93968	1.27135	0	0	0.620038	1.92575	0.518793	0	0	0	0	0	0	0.375237	2.34014	0	0
KLF7	1.09643	0	0.807086	1.20221	0.562155	0	0	0	0	0	0	0.313976	0	0	0	0	0	0	0	0.781557	0	0	0	0.296178	1.25248	0.728285	2.57598	0	0	0	0	2.52357	2.95956	0.767411	0	0	0.543499	0	0.187336	4.43465	0	0	0	0	0	0.50207	0.816774	0	0
ZNF669	1.11094	0	0	0	0	0	0	1.20431	0	0	0	0	2.47668	0	0	0	0	1.21418	0	0.945425	0	0	0	0.357412	0	0	2.94778	0	2.02107	1.44059	0	0	0.525059	1.68802	0	0	0	0	0	0	0	0	0	0	0	1.70145	0	0	0
ZNF547	0.922087	0	0.513993	0	0.427706	0	0	0	0	0	2.84507	0.447854	1.10333	0.590073	0	0	0	0	0	0	0	0	0	0.361656	1.66011	1.54591	2.86629	0	0	2.21707	0	0	0.868181	0.955726	0	0	0.572969	0	0.747286	1.12194	1.26021	0	0	0	0	1.00456	0.450361	0	0
ZNF436	1.81246	1.09948	0.464429	1.01444	1.29728	0	0	1.0862	1.13815	0.78691	0	0.545438	0	0.9189	0	0	0	0	0	1.78861	0	1.25035	0	0.646966	0	1.14344	2.75957	0	0	1.0464	0	0.881221	0.953012	0.894886	0	0	0.330734	1.23255	1.30893	0	0	0	0	0	0	0.524368	0.619223	0	0
SCRT1	0.98156	0	0	0	0.855547	0	0	0	0	1.47948	0	0.682582	0	0	0	0	0	0	0	2.01073	5.04859	0	0	0.857585	0	0	1.58799	0	0	1.11289	3.70573	1.75347	3.43896	0	0	0	0.767124	0	0.711262	0	0	0	0	0	0	1.10806	0.48548	0	5.59399
ZNF768	2.48416	0.946323	0.511808	4.51027	1.97023	0	0	4.64514	2.13753	0	0	2.75654	0	0.849876	0	0	0	0	0	3.90997	0	2.18654	0	0.954025	0.895631	3.92307	12.4362	0	0	2.44276	0	5.05659	1.60105	2.12207	1.22326	0	0.373542	3.04883	1.83343	3.17159	0	1.18009	0	0	0	0.854237	0.910562	0	0.925373
KLF1	1.57317	0	2.64962	0	0.566787	0	0	0	0	2.20043	0	0.454465	0	0.707454	0	0	1.1455	0	0	0.705217	0	0	0	0.318236	0.998221	1.65593	1.10301	0	0	0	0	0.98966	0.638224	0	0	0	0.892068	0	0.358837	0	0	0	0	0	0	0.593	0.650735	0	0
ZFP82	1.50758	1.14793	0	4.22985	1.69709	0	0	0	0	0	0	1.02478	0	0.588043	0	0	0	0	0	2.6425	0	4.44042	0	0.589137	1.84798	1.38376	7.49504	0	0	3.12814	0	0	2.50233	1.9566	0	0	0.570759	2.60492	0.702051	11.5276	0	0	0	0	1.71799	0.81965	0.80905	0	0.925884
GTF3A	1.13969	0	0	0.989827	0.687726	0	0	0	0	0	0	2.56355	0	0	0	0	0	0	0	2.00738	0	29.8155	0	0.607591	1.5001	0.771699	2.59177	0	0	1.08675	1.4199	3.17491	1.8327	0.809669	0	0	0.46591	0	0.614602	1.0306	0	0	14.7552	0	0	1.1462	0.641653	0	0
ZNF71	1.05885	1.66744	0.458368	1.13395	1.13221	0	0	0	0	0	0	2.03912	0	0.905513	0	0	0	0	0	1.64047	0	1.24548	0	0.51827	0	0.985844	3.42003	0	0	1.48551	0	1.94463	0	2.13058	0	0	0	0	0.637621	0.548186	0	1.41131	0	0	0	0.607332	0.564254	0	1.0655
ZNF594	0.913375	1.13937	1.46623	0	0.902162	0	0	0	0	1.70196	0	0.775293	0	1.0063	0	0	1.66613	0	0	1.49148	2.69848	0	0	0.57362	0	0.896138	4.28655	0	0	0	1.161	1.90748	0.764537	0	0	0	0.750602	0	0.848943	0	0	1.17781	0	0	0	2.31255	0.287117	0	0
ZNF280A	1.23774	0	0	0	0.594661	0	0	0	0	0	0	1.74537	0	0	0	0	0	1.17784	0	0	0	0	0	0.432373	1.00126	0	1.03662	0	0	0	0	0	0.339251	2.65054	0	0	0.602341	0	1.06477	0	0	0	0	0	0	0.716078	0.775304	0	0
ZNF320	0.97893	0	0.713205	1.06356	0.581082	0	0	0	0	1.28315	0	1.09488	0	0.996379	0	0	0	0	0	1.52856	0	1.09983	0	0.477261	0	1.34418	6.95225	0	0	1.81943	0	0	2.38621	1.0393	0	0	1.23095	0	0.601731	1.55149	0	0	0	0	0	0.342284	0.605953	0	1.40123
ZNF140	0	1.08329	0	1.06076	0.885173	0	0	0	0	1.00463	0	0.540714	1.1795	0.883456	0	0	0	0	0	0	0	0	0	0.281184	0	0	1.80562	0	0	0	0	0	0.702562	0.969431	0	1.20958	0.493727	1.14691	0.340023	2.03134	0	0	0	0	0	0.297653	0.57659	0	0
ZNF322	0	1.18226	7.90848	0	0.711635	0	0	0	0	7.13486	0	0.49	0	1.682	0	0	1.43356	0	0	0	0	0	0	0.376371	0	0	0	0	0	0	0	0	0.34485	0	0	0	2.77717	0	0	0	0	0	0	0	0	0.38886	0	0	0
ZFP28	0	1.01949	0.615304	1.75712	0.832614	0	0	1.39487	1.18564	0	0	0.49779	1.6312	0.617145	0	0	0	0	0	0	0	0	0	0.299221	0.976719	0	3.85643	0	0	0	0	0	0.590848	1.06772	0	1.4375	0.391689	1.33547	0.479328	0	0	1.20404	0	0	0	0.510441	0.979741	0	1.00194
ZBTB14	0	1.90433	0.631438	0	0.421291	0	0	0	0	0	0	0	0	1.41608	0	0	0	0	0	0	0	0	0	1.11893	0	0	0	0	0	0	0	0	0.839179	0	0	0	0.491749	0	0	0	0	0	0	0	0	0.830354	0.32576	0	0
ZNF189	0	1.74677	0.617526	1.37558	0.970764	0	1.76851	1.34393	0	0	0	0.672168	0	0.932298	13.0197	0	0	0	1.18786	0.661756	0	0	0	0.175003	1.27308	0	2.83568	0	0	0	0	0	1.58938	0.783713	0	0	0.631433	1.48978	0.6544	1.36865	0	0	0	0	0	0.311559	0.49592	0	1.51174
ZNF595	0	1.06965	0.85029	0	1.00949	0	0	0	1.20462	0	0	0.870589	0	1.22417	0	0	0	0	0	0	0	0	0	0.301019	0	0	2.31012	0	0	1.39979	0	0	1.72565	0.949916	0	0	0.668017	1.13735	0.727136	1.80199	0	0	0	0	0	0.6348	0.382059	0	1.27895
ZBTB42	0	1.01978	0	1.10133	0.691101	0	3.37229	1.15064	0	0	0	0.498301	0	1.26697	0	0	0	0	0	0.767863	0	0	0	0.207011	9.27869	0	1.26719	0	0	0	0	0	2.04328	2.19108	0	0	0.641923	1.56975	0.479869	8.39512	0	0	0	0	0	0.367859	0.380619	0	1.21514
ZNF596	0	0.99968	1.57908	0	1.23871	0	0	0	0	0	0	0	0	0.786038	0	0	0	0	0	0.73807	0	0	0	0.274748	0	0	2.4085	0	0	0	0	0	1.6166	0	0	0	0.444013	1.08701	0.290904	0	0	0	0	0	0	0.339335	0.353447	0	0
PRDM1	0	1.60985	0.561223	0	2.04459	0	0	0	0	0	0	1.15728	0	1.72179	0	0	0	0	0	2.23248	0	0	0	0.785588	1.73189	0	0.597801	0	0	0	0	0	2.48569	0	0	0	1.08361	0	0.369323	0	0	0	0	0	0	2.05351	0.683648	0	0
ZNF419	0	1.35221	0	1.24521	0.763135	0	0	2.29135	0	0	0	1.14881	0	0.503494	0	0	0	1.13352	0	0.951631	0	1.28797	0	0.501681	0	0.750939	15.0305	0	0	3.13256	0	0	1.05789	0	0	0	0.31073	1.04913	0.707531	1.64084	0	0	0	0	0	0.826215	0.348074	0	1.12535
ZNF214	0	1.15745	1.08387	0	0.988254	0	0	0	0	0	0	0	1.21724	0.798273	0	0	0	0	0	0	0	0	0	0	0	0	0	0	0	0	0	0	0.947114	1.08099	0	2.02218	0	0	0.499671	3.22776	0	0	0	0	0	0.446973	0.698197	0	0
ZNF667	0	1.20609	0.700494	1.04895	0.63174	0	0	3.31077	0	0	0	0.796105	0	0.875407	0	0	0	0	1.45879	0.73098	1.96995	1.09488	0	0.213712	0.94911	0	1.08053	0	0	1.1066	0	0.837596	1.32934	2.10867	0	0	0.360281	1.0834	0.835838	6.52081	0	0	0	0	1.21737	0.635202	0.468928	0	1.39063
ZNF16	0	1.03129	0	1.79801	1.24128	0	0	1.40252	0	0	0	0.519665	0	1.08748	0	0	0	0	4.30709	1.28603	0	0	1.26322	0.217963	0	1.04535	4.62353	0	0	0	1.70408	0	0.54776	1.08707	0	0	0.49476	1.34583	1.31056	2.27336	0	0	0	0	0	0.636199	0.536921	0	1.22983
ZNF778	0	1.25284	0.773097	0	0.801627	0	0	0	0	0	0	0	1.15254	1.20693	1.45092	1.26329	0	0	0	0.788643	0	0	0	0.22	0	0	1.0105	0	0	0	0	0	1.9058	1.66358	0	1.444	0.498319	1.11151	1.2051	1.19675	0	0	0	0	0	0.338718	0.611355	0	1.23244
ZNF770	0	1.41125	0	1.35029	0.942727	0	0	0	0	0	0	0.71731	0	1.36089	0	0	0	0	0	0	0	0	0	0.237157	0	0	2.06837	0	0	0	0	0	0.961671	2.27358	0	0	0.581491	1.08021	0.773137	3.35045	0	0	0	0	0	0.36982	0.34192	0	0.971471
ZNF331	0	0	1.00962	1.10256	0	0	0	1.39543	0	0	0	0.424887	0	0.618721	0	0	0	0	0	0	0	0	0	0.950082	0.977678	1.92577	4.36628	0	0	3.748	0	0	0.628533	0	0	0	0.726632	0	0.480955	2.37011	0	0	0	0	0	1.75602	0.782402	0	0
ZNF34	0	0	0.671695	2.75322	0	0	0	0	0	0	0	0	0	0	0	0	0	1.18327	0	1.69151	0	0	0	0.24161	0	0.894136	1.411	0	0	0	1.45946	0	1.01781	1.32071	0	0	0	2.79976	0.677219	2.71129	0	0	0	0	0	0.369279	0.737079	0	0
ZNF816	0	0	1.28991	0	0.90125	0	0	0	0	0	0	0.612114	1.19476	0.972966	0	0	0	0	0	0	0	0	0	0	1.0829	0	1.5934	0	0	1.18082	0	0	1.217	1.01248	0	1.21997	0.790325	0	0	1.42896	0	0	0	0	0	0.565123	1.04891	0	0
IKZF3	0	0	0.459868	0	0.561482	0	0	0	0	1.61309	0	0.488305	0	0.443066	0	0	0	0	0	0	0	0	0	0.228273	1.02854	0.98814	0	0	0	0	0	0.722002	0.128579	1.04483	0	0	1.01363	0	0.206437	0	0	0	0	0	0	0.269564	0.566672	0	0
ZNF513	0	0	0.890292	0.881003	0.713299	3.38937	0	1.18549	0	0	0	0.836984	0	0.893617	0	0	0	0	0	1.06263	1.75023	0	0	0.243841	0	1.34609	13.8821	0	0	0	0	0	1.15357	1.18157	0	0	0.500525	1.14938	1.00644	1.52289	0	0	0	0	1.23733	0.560091	0.585453	0	1.529
ZBTB6	0	0	1.83956	0	0	0	0	0	0	0	0	0	0	0	0	0	0	0	0	0	0	0	0	0	0	0	0	0	0	0	0	0	0.497349	0	0	0	1.09863	0	0	3.63254	0	0	0	0	0	0.633919	0.573624	0	0
PATZ1	0	0	0.664077	0	0.88923	0	0	0	0	1.41763	0	0.487428	0	0.823432	0	0	0	0	0	1.44563	0	0	0	0.882657	0.925592	0.949152	2.22533	0	0	0	0	1.15392	0.869691	0	0	0	1.33546	0	0.726282	0	0	0	0	8.76237	0	0.346764	0.83011	0	0
ZNF610	0	0	2.01196	0.890579	0.540686	0	0	0	0	0	0	0.561313	0	0.774154	0	0	0	0	0	1.07432	0	0	0	0.207246	0	0	2.24305	0	0	0	0	0	1.53847	1.19129	0	0	0.511407	0	0	4.02102	0	0	0	0	0	0.311127	1.22554	0	1.30816
ZNF549	0	0	0.805929	0	0	0	0	0	0	0	0	0	1.45363	1.0003	1.22628	0	0	0	0	0	0	1.17923	0	0.296414	0	0	1.78168	0	0	0	0	0	2.39432	0	0	1.48254	0.695659	0	0.668433	0	0	0	0	0	0	0.513925	0	0	0
ZNF37A	0	0	1.02516	2.62926	0	0	0	0	0	0	0	0	1.20758	0	0	0	0	0	0	0.970204	1.24098	0	0	0.736191	0	0	3.24328	0	0	0	0	0	1.81137	0	0	1.22862	1.27266	0	0.922129	0	0	0	0	0	0	0	0.963291	0	0
ZNF394	0	0	3.04419	0	0.625967	0	0	0	0	2.06268	0	0	0	0.818981	0	0	1.24226	0	0	0	0	0	0	0.679326	0	0	0	0	0	0	0	1.08641	0.369055	0	0	0	1.43425	0	0.521197	0	0	0	0	0	0	0	0	0	0
ZSCAN30	0	0	1.75257	0	1.30016	1.50309	0	0	0	2.20274	0	2.02389	0	0.816227	0	5.80799	0	0	0	1.05691	0	0	0	0.665248	0	0	0.360507	0	0	0	0	3.81327	0.442631	0	0	0	0.482146	0	0.307469	0	2.32978	0	0	0	0	0.263774	0.671692	0	0
ZNF250	0	0	0	0.681773	0.893445	0	0	1.1149	0	0	0	1.53065	0	0.692384	0	0	0	0	0	1.68232	0	1.29362	0	0.348427	0.905675	0.759236	8.26228	0	0	1.08024	0	0.786741	0.729125	0	0	0	0.721333	0	2.02359	0	0	19.5312	0	0	0	0.6968	0.514872	0	0
ZNF257	0	0	0	2.88553	0	0	0	0	0	0	0	0	0	0	0	0	0	1.23818	0	0	0	0	0	0.802801	0	0	0	0	0	0	0	0	0.800576	0	0	0	0	0	1.35087	3.00393	0	0	0	0	0	0.652553	0.814679	0	0
ZNF18	0	0	0	2.21907	0	0	0	0	0	0	0	0	0	0.640566	0	3.95265	0	0	0	0.887818	0	0	0	0.252627	0	0	1.36099	0	0	0	0	0	1.49619	1.19303	0	0	0.622427	0	1.26474	0	0	0	0	0	0	0.445466	0	0	0
ZNF490	0	0	0	1.83445	0	0	0	5.85297	0	0	0	1.10337	1.40287	0	2.47378	0	0	0	0	0.801567	2.50839	1.12709	0	0.160399	0	1.24961	6.16811	1.24546	1.46798	0	0	1.28414	0.729841	0.910693	0	0	0.513085	1.11743	1.1865	1.69312	0	0	0	0	2.27118	2.80924	0.486243	0	0
ZSCAN5C	0	0	0	0.804158	0.798595	0	3.34953	0	0	1.00311	0	0.324599	0	0	43.1118	0	0	0	0	1.4965	0	0	0	0.262907	0	0.898741	1.1581	0	0	1.07061	0	0.769113	0.691668	1.11151	0	0	0.561231	0	0.400334	0	0	0	0	0	0	1.29974	0.794633	0	0
MZF1	0	0	0	1.36556	0	0	0	0	0	0	0	0	0	0	18.3648	2.06968	0	0	0	1.18152	0	0	0	0.544127	0	2.05221	5.95918	0	0	0	0	0	0.368207	1.13313	0	0	0	0	4.38447	0	3.68081	0	0	0	0	0.660557	0.831195	0	0
ZNF8	0	0	0	1.09658	0	0	0	0	0	0	0	0	0	0.79445	0	0	0	1.20379	0	0	0	0	0	0.584567	0	0	2.69656	0	0	0	0	0	0.350734	1.83882	0	0	0.639672	0	0.837831	0	0	0	0	0	0	1.4238	0.621037	0	0
ZNF418	0	0	0	0.892863	0.448449	0	0	0	0	0	0	0.465503	1.18494	1.04989	0	0	0	0	2.01401	0	0	0	0	0.253083	0	0	9.25198	0	0	0	0	0	1.65018	1.40273	0	3.27511	0.514036	1.15412	1.03926	0	0	0	0	0	1.2387	0.51271	0	0	1.08036
ZNF502	0	0	0	1.57166	0	0	0	0	0	0	0	0	0	0	0	0	0	0	0	0	0	0	0	0.535858	0	0	0.829437	0	0	0	0	0	0.855267	0	0	0	0.724777	0	1.06846	0	0	0	0	0	0	0.461527	0	0	0
ZNF563	0	0	0	3.32436	0.295093	0	0	1.85187	0	0	0	0	0	0	0	0	0	0	0	2.08396	0	0	0	1.00037	0	1.30461	12.0342	1.23777	0	0	0	0	0.204709	0.833962	0	0	0	2.6746	0.562644	1.49223	0	0	0	0	0	0.89951	0	0	0
ZNF692	0	0	0	0	0.893644	0	0	0	0	0	0	0	0	0	0	0	0	0	0	1.45885	0	0	0	0.681266	0	2.439	5.25859	0	0	0	0	0	0.370065	0	0	0	0.844742	0	5.18286	0	0	0	0	0	0	3.25672	0	27.971	0
ZFP3	0	0	0	0	0.40085	0	0	0	0	0	0	0.594176	0	0	0	0	0	0	0	0	0	0	0	0.488526	0	0	1.01009	0	0	0	0	0	0.689573	0	0	0	0	0	1.4539	0	2.60722	0	0	0	0	1.2101	0	0	0
ZNF184	0	0	0	0	1.73084	0	0	0	0	0	0	0	0	0.867412	0	0	0	0	0	1.14942	0	0	0	0	0	0	0.673586	0	0	0	0	0	1.38083	0	0	0	0	0	0.420205	0	0	0	0	0	0	0.450826	0	0	1.35209
GLIS1	0	0	0	0	0.512845	0	0	0	0	0	0	0	0	0	0	0	0	0	0	0.740064	0	0	0	0.447136	0	3.60634	1.1015	0	0	0	0	0.845925	1.85475	0	0	0	0.836805	0	0.599837	0	0	0	0	0	0	0.916604	0.479675	0	0
ZNF582	0	0	0	0	0.462002	0	0	0	0	0	0	0	0	0.795319	0	0	0	1.45967	0	0	0	0	0	0.862188	0	0	1.26561	0	0	0	0	0	0	0.994617	0	0	0.864958	0	0	0.849238	0	0	0	0	0	0.530849	0	0	0
MYNN	0	0	0	0	0.718767	0	27.485	0	0	0	0	0.330051	0	0.898082	0	0	0	0	0	0	0	0	0	0.566912	0	0	0.730711	0	0	0	0	0	0.386888	1.2245	0	0	0.607384	0	0.398664	0.830014	0	0	0	0	0	0.568028	0.484015	0	0
ZNF449	0	0	0	0	0.875427	0	0	0	0	0	0	0	0	1.1281	1.18851	0	0	0	0	0.914564	0	0	0	0.555043	0	0	0.844168	0	0	0	0	0	2.13609	0	0	0	0.945397	0	0.463142	6.45739	2.60344	0	0	0	0	0.446626	0.432526	0	0
ZNF324	0	0	0	0	0	0	0	0	0	0	0	0	0	0	0	0	0	0	0	0	0	0	0	1.5935	0	0	0	0	0	0	0	0	0	0	0	0	0	0	0	0	0	0	0	0	0	0	0	0	0
ZNF76	2.24284	0	0	0	0.349464	0	0	0	0	0	0	0.857545	0	0.475823	0	0	0	0	0	1.05047	0	1.04752	0	0.593454	0	0.879401	0	0	0	6.92611	0	0	1.17919	0	0	0	0.477574	0	0.659487	0	0	0	0	0	0	1.10728	0.616404	0	0
ZNF684	1.05836	3.36248	0	0	8.47749	0	0	14.9679	0	0	0	0	0	3.31062	0	0	3.54151	0	10.0776	3.04623	0	0	3.95103	1.64472	0	0	0	0	0	0	0	0	8.28146	0	0	0	0.582775	0	0.818962	0	0	0	0	0	0	0.777032	0	0	0
ZNF213	1.43631	0	0	0	1.08442	0	0	0	0	0	0	0.362003	0	2.52822	0	0	0	0	0	3.60745	0	0	0	0.827696	0	0	0.791964	0	0	1.84853	0	19.2895	5.11946	0	0	0	1.61014	0	0.555673	0	0	0	0	0	0	1.42501	0.463641	0	2.30231
KLF12	1.1569	0.978522	0	0	0.473993	0	0	0	0	0	0	1.39598	0	0.451544	0	0	0	0	0	1.45982	0	1.08343	0	0.692834	8.4466	7.32934	0.940758	0	0	0	0	0	2.20038	1.88063	0	0	0.921863	0	0.692504	0	0	0	0	0	0	1.65166	1.13175	0	0
ZNF454	1.06006	0	0	3.44006	0	0	0	0	0	0	0	0.43626	0	0	0	0	0	0	0	1.40972	0	0	0	0.558425	0	0	6.95448	0	0	1.89861	0	0	0.311609	1.77869	0	0	0	1.87156	1.45897	0	0	0	0	0	0	1.64539	0.395418	0	0
EGR2	0.988646	0	0	0.759882	0.393597	0	0	0	0	0	0	0.914882	0	0.601824	0	0	0	0	0	1.71668	0	0	0	0.585419	0	9.1564	9.09242	0	0	0	0	0	0.910857	1.60799	0	0	0.622989	0	2.3805	0	0	0	0	0	0	0.999841	0.62662	0	0
EGR3	1.10494	1.13703	0.501157	0	0.681855	0	0	0	0	0	0	0.601848	0	0.829918	0	0	0	0	0	3.28966	0	0	0	1.07898	1.07461	1.36264	0	0	0	1.06811	0	1.41427	1.57677	0.940382	0	0	0.554916	0	0.639664	0	0	0	0	0	0	0.618951	0.485205	0	0
ZNF264	0.970548	0	0.57658	1.51568	0.370374	0	0	0	0	0	0	0	0	0	0	0	0	0	0	5.38058	0	0	0	0.793298	0	0	0	0	0	0	0	0	1.48376	1.74626	0	0	0.435635	0	0.384412	0	0	0	0	0	0	0.762351	0	0	0
ZNF341	0.93547	0	0	1.12783	0.504119	0	0	0	0	0.850402	0	0.588177	0	0.97633	0	0	0	0	0	0.973953	0	0	0	0.500707	0	0	1.47557	0	0	0	0	0	0.883248	0	0	0	0.596536	1.5075	0.870038	0	0	0	0	0	0	0.292686	0.52422	0	0
ZFP42	0.965133	0	0.569182	5.36519	0.491273	0	0	0	0	1.07239	0	0.713343	0	0	0	0	0	0	0	3.94541	0	0	0	1.10137	0.942524	3.53337	1.60507	0	0	1.10268	1.93248	0.829781	3.63118	2.62487	0	0	0.878581	3.37106	0.328169	1.36711	0	0	0	0	0	1.16947	0.459089	0	1.58779
ZNF574	0.918736	0	0	2.51159	0.313408	0	0	3.46396	0	0	0	0.730741	0	0.41045	0	0	0	0	0	2.35086	0	0	0	0.630267	0	1.06237	8.72472	12.7474	1.93128	1.75672	0	0	2.11685	2.78357	0	0	0.371824	1.93467	1.03111	1.49806	0	0	0	0	0	1.20817	0.445564	0	0
ZNF784	1.1795	0	0	0	0.438604	0	0	0	1.17638	0	0	0.526588	0	0	37.8737	0	0	0	0	1.82276	1.2036	0	0	0.465886	1.35448	3.74952	0.714318	0	0	0	0	4.40545	0.695742	0	0	0	0	0	0.689287	0	0	0	0	0	0	1.02933	0.960317	0	0
ZSCAN22	1.95008	2.21155	0	3.76802	5.9925	0	0	0	0	0	0	0.517647	0	5.68845	0	2.60761	0	0	0	6.64279	0	0	0	2.20721	0	1.11878	2.56886	0	0	1.89316	0	0.945229	7.13041	4.19608	0	0	2.88948	4.04354	1.49281	12.6521	3.14483	1.21986	0	0	0	1.36402	0.550814	0	1.73201
ZNF22	1.21214	1.67244	1.27533	2.58766	2.70137	0	0	1.15156	1.94248	0	0	0.351895	0	1.27346	0	0	0	0	1.72528	5.35291	0	0	0	1.76339	0	0.848282	0	0	2.48412	0	0	8.85199	3.02162	3.88554	0	0	0	1.8058	0.594109	0	0	0	0	0	0	5.46512	0	0	0
SNAI1	0.988646	1.44055	0	0	2.66925	0	0	0	0	0	0	0	0	1.86712	0	0	0	0	0	3.15958	0	0	0	0.763649	0	0	0	0	0	0	0	0	2.51378	0	0	0	1.10795	0	0.410401	0	0	0	0	0	0	0.308951	1.14301	0	0
ZNF677	1.00099	0	0	0.942374	0	0	0	0	0	0	0	0	0	0	0	0	0	0	0	1.4283	0	1.11417	0	1.14728	0	0	1.27862	0	0	0	0	0	2.46311	1.26081	0	0	0	1.5727	1.09846	8.1447	0	0	0	0	0	0.758524	0.586942	0	0
ZNF675	1.0016	0	1.28097	4.24924	1.42081	0	0	0	2.95222	0	0	0.730171	0	0.624029	0	0	0	0	0	3.07205	0	0	0	1.27554	0	0	0	0	0	0	0	0	5.73971	1.8263	0	0	0.649566	6.2643	1.21271	0.714814	0	0	0	0	0	1.00234	0	0	0
ZNF524	0.980097	0	0	0	0.449377	0	0	0	0	0	0	0.399385	0	0.48475	0	0	0	0	0	1.37408	0	0	0	0.881275	0	3.96739	0.824113	0	0	1.82061	0	2.29038	2.56201	0	0	0	0.920885	0	0.501048	0.974257	0	0	0	0	0	0.923604	0.984408	0	0
KLF14	0.988348	0	0.601688	0	0.668758	0	0	0	0	0	0	0	0	0.706681	0	0	0	0	0	1.5555	0	0	0	0.762727	0	1.54124	0.553332	0	0	0	0	0	2.78331	1.05355	0	0	0	0	0.729081	0	0	0	0	0	0	1.22875	0	0	10.6932
ZNF273	1.13839	0	0.875716	4.52239	1.0366	0	0	0	0	1.03585	1.25207	0.655913	0	0.617352	0	0	0	1.14108	1.194	1.12646	0	1.30108	0	0.507196	0.915104	0.934008	4.77176	0	0	1.08607	0	1.13652	0.386714	1.83867	0	0	0.741322	3.3132	1.90785	2.7627	0	0	0	0	0	0.680638	1.24017	0	0
ZBTB48	0.979221	1.00215	0	0.905488	0.915639	0	0	0	1.67959	0	0	0.747082	0	0.791741	2.19246	0	0	0	0	1.84448	0	0	0	1.02119	1.36402	3.26402	9.60138	0	0	1.11145	0	4.26742	4.03178	1.03974	0	0	0.447703	0	1.01397	1.69741	0	0	0	0	0	0.831678	1.10642	0	0
ZNF467	1.17394	0	0.573442	4.61883	0.496377	0	0	3.30599	0	0	0	1.25907	0	0.668539	0	0	0	0	1.45773	3.81407	1.20233	1.32493	0	0.786224	0	2.52206	26.0394	1.50201	0	2.04322	0	1.01076	2.91923	1.91974	0	0	0.584085	4.0669	2.90425	1.09248	0	0	0	0	0	1.18291	0.945508	0	1.3862
ZSCAN31	1.38002	1.62428	0.93951	0	0.948074	0	0	0	0	0	0	0.519226	0	2.0655	4.1933	0	0	1.1548	0	2.73494	0	0	0	0.732265	0	2.18008	1.25474	0	0	0	0	4.20012	1.62999	0	0	0	0.887995	0	0.579762	0	0	0	0	0	0	1.01319	1.06692	0	0
ZFP64	0	0	0.536913	0.843102	0.747756	0	0	0	0	0	0	3.86087	0	0.620039	0	0	0	1.14184	0	2.00941	0	0	0	0.60881	0	3.8896	2.00399	0	0	0	0	0.969452	0.843065	0	0	0	0.536246	0	0.750489	0	0	0	0	0	0	1.34164	1.0271	0	0
ZNF224	0	0	1.34728	3.97286	0.280401	3.88647	0	2.55363	3.39314	0	0	0.604909	0	0	6.65318	0	0	0	0	1.72842	2.97328	1.07679	0	0.717446	0	2.09758	12.5341	0	0	1.78383	0	3.19579	1.43042	1.33415	1.22742	0	0	3.55131	1.03331	3.46821	0	0	0	0	0	0.77203	0.595204	0	0
KLF15	0	0	0.601688	2.2114	0.3932	0	0	0	0	0	0	0.770126	0	0	0	0	0	1.1637	0	1.39527	0	1.10599	0	0.64405	0.966922	1.89523	1.03806	0	1.71168	0	0	1.22382	0	0.868962	0	0	0.460896	2.02563	1.04821	6.75287	0	1.45649	0	0	0	0.630656	0.56149	0	0
ZNF121	0	0	2.60117	2.81322	0	0	0	0	1.20268	0	0	0.501294	0	0	1.46409	0	0	0	0	1.72879	1.22254	0	0	0.939555	0	2.07104	11.0219	0	0	0	0	0	1.85505	3.74503	0	0	0	1.85602	2.30249	0	0	0	0	0	0	1.54526	0.373802	0	0
ZNF85	0	2.51018	2.00046	2.20538	0.73394	0	0	1.87467	0	0	0	1.26728	0	1.01853	0	0	0	0	0	2.66978	0	0	0	0.935096	0	4.36302	0.937041	0	1.45596	0	2.44975	1.7673	2.73305	0.867106	0	0	1.10166	1.0941	0.830931	1.28254	0	0	0	0	0	1.49638	0.494456	0	0
ZNF35	0	0	0.700014	0	0	0	0	0	0	0	0	0.319814	0	0.573356	0	0	0	0	0	1.81693	0	0	0	0.518127	0	0	0	0	0	0	0	0	2.76055	0	0	0	0.665804	0	0.585103	0	0	0	0	0	0	0.505103	0.711591	0	0
ZNF350	0	0	0.840487	0	0.542409	0	0	0	0	0	0	0	0	0	0	0	0	0	0	0	0	0	0	1.18292	0	1.02319	0.845969	0	0	0	0	0	0.432604	0	0	0	0.741402	0	0.723703	1.11573	0	0	0	0	0	0.642305	0.515313	0	0
ZNF30	0	0	0.790806	0.929197	0	0	0	1.45365	0	0	0	0.615768	1.4494	0	1.22409	0	0	0	0	1.71094	0	0	0	0.633173	0	0	5.56745	0	2.01623	0	0	0	0.887548	1.44551	0	0	0	0	1.90173	0	0	0	0	0	0	1.52925	0	0	0
ZNF281	0	0	0.551672	0	0.470598	0	0	0	1.41651	1.054	0	0.811433	0	0.544183	0	0	0	1.1472	0	1.30405	1.45218	0	0	0.352617	0	2.95894	0.411019	0	0	0	0	2.88736	0.642694	0.999202	0	0	0.55535	0	0.31341	0	0	0	0	0	0	0.35052	0.72443	0	0
ZSCAN16	0	0	2.02214	0.696083	0.336437	0	0	0	0	0	0	0	0	0	0	13.5815	0	0	0	0	0	0	0	0.511273	0	0	0	0	0	0	0	0.800255	0.986907	0	0	0	0.467439	0	0.751872	3.44505	5.01066	0	0	0	0	0.25978	0.258919	0	0
ZBTB12	0	1.68516	0	1.62364	1.52681	0	0	0	0	0	0	0	0	0.969494	0	0	0	0	0	2.61035	0	0	0	0.924285	0	0	0.689214	0	2.23265	0	0	0	2.27752	1.65332	0	0	0.405182	2.75694	0.26947	1.03216	0	0	0	0	0	0.531514	0	0	0
ZBTB18	0	0	0	0	0.528131	0	0	0	0	0	0	0	0	0.72495	0	0	0	0	0	2.17288	0	0	0	1.19556	6.25922	0	0	0	0	0	0	0	0.542124	0	0	0	0.723696	0	0.702101	0	0	0	0	0	0	0.78342	1.88545	0	0
ZNF554	0	0	0	0	0.567491	0	0	0	0	0	0	0	0	0	0	0	0	0	0	0	0	0	0	1.11139	0	0	0	0	0	0	0	0	0.410492	0	0	0	0.648225	0	0.533395	3.03443	0	0	0	0	0	0.329223	0.912319	0	0
ZBTB26	0	0.990194	0	0	0.301467	0	0	0	1.67272	0	0	1.58671	0	0	0	0	0	1.1539	0	0.724407	0	0	0	0.617768	0	0	1.24757	0	0	0	0	1.89136	2.21194	1.73612	3.06166	0	0.580975	0	0	9.98679	0	0	0	0	0	0.369436	0.341593	0	0
GLI4	0	0	0	2.53243	0.41287	0	0	13.3496	0	0	0	0.882301	0	0.73985	0	0	0	0	1.70762	3.11559	7.30831	1.08362	0	1.161	0	0	1.99663	0	0	0	0	1.33702	2.91988	2.40851	0	0	0.559622	4.25814	1.35299	0	0	0	0	0	28.2817	0.719181	0	0	0.959247
ZNF200	0	0	0	0	0.295365	0	0	0	0	0	0	0.767931	0	0	0	0	0	0	0	1.02029	0	0	0	0.735869	0	0	0.778533	0	0	0	0	0	0.388234	2.07486	0	0	0.643783	0	0.515093	0	0	0	0	0	0	0.444148	0.744826	0	0
SP2	0	0	0	0	0.344496	0	0	0	0	0	0	0.740966	0	0	0	0	0	7.88972	0	1.44131	0	0	0	0.692557	0	0.856416	0.480615	0	0	0	0	0	0	0	0	0	0.658715	0	0.437601	0	0	0	0	0	0	1.11768	1.14597	0	0
ZNF134	0	0	0	0.784712	0.784403	0	0	0	0	0	0	0.665341	0	1.07519	0	0	0	0	0	0	0	0	0	0.629567	0	0.856826	2.01383	0	0	0	0	0	3.46876	0	0	0	0.659378	0	0.608633	0.72164	0	0	0	0	0	0.823347	0.597912	0	0
ZNF146	0	0	0	0.657321	0.251807	0	0	0	3.10836	0	0	0.768081	0	0	0	0	0	0	0	1.75995	0	1.05346	0	0.567436	0	1.3604	0.521179	0	3.17659	1.06744	0	2.70937	3.50627	1.43246	1.48096	0	0.489719	0	0.475187	3.23273	0	0	0	1.25976	0	0.68651	0.384012	0	0
ZNF98	0	1.06528	0	1.38295	0.737757	0	0	0	0	0	0	0.414979	0	0.958679	0	0	0	1.44109	0	1.01832	0	0	0	1.09676	0	0	0	0	0	0	1.97764	0	3.73975	0	0	0	0.657229	1.61616	0.513416	1.28455	0	0	0	0	0	0.389749	0.534646	0	0
ZNF45	0	0	0	1.47891	0	0	0	1.19186	0	0	0	0	0	0	0	0	0	0	0	1.28077	2.01645	0	0	0.490728	0	0	4.63903	0	0	0	0	0	2.17292	1.20412	0	0	0	0	1.30313	0	0	0	0	0	1.23987	0.391127	0	0	0
ZNF317	0	0	0	0	0	0	0	2.6535	0	0	0	0.806545	0	0	0	0	0	0	0	1.16113	3.2897	0	0	0.875842	0	3.34483	17.1017	3.89437	0	1.14222	0	0	0.637019	0	0	0	0.436114	0	1.35364	12.8396	0	1.21328	0	0	0	2.15412	0.352725	0	0
ZNF175	0	0	0	0	0	0	0	0	0	0	0	0.783275	1.20439	0	0	0	1.23293	0	0	0	0	0	0	0.372772	0	0	15.2758	0	0	0	0	0	0	1.04105	1.25273	0	0	0	0.799156	0	0	0	0	0	0	0.952342	0	0	0
ZNF33A	0	0	0	0	0	0	0	0	0	0	0	0.6973	1.74966	0	0	0	0	0	0	1.05462	0	0	0	0.766673	0	0	15.7935	0	0	0	0	0	0	0	0	0	0	0	3.00827	0	0	0	0	0	0	1.06805	0	0	0
ZNF263	0	1.54996	0	0	0	0	0	0	0	0	0	0	0	2.63378	0	0	0	0	0	0	0	0	0	0.459848	0	0	1.08575	0	0	0	0	0	2.33322	0	0	0	0.609133	0	0	0	0	0	0	0	0	0.950506	0	0	0
ZNF528	0	0	0	1.26247	0	0	0	0	0	0	0	0.457984	0	0	0	0	0	0	0	1.44329	0	0	0	0.551523	0	0	0.716488	0	0	0	0	0	0.627901	0	0	0	0	1.64057	0	0	0	0	0	0	0	0.568136	0	0	0
ZNF136	0	0	0	1.5719	0	0	0	0	0	0	0	0	0	0	0	0	0	0	0	1.92217	0	0	0	1.07527	0	0	3.58447	0	0	0	0	0	0.208581	1.35095	0	0.948377	0	1.13647	0.385452	0	0	0	0	0	0	1.33845	0.380083	0	1.05355
YY1	0	0	0	0	0	0	0	0	0	0	0	0	0	0	0	0	0	0	0	0.910844	0	0	0	0.509745	0	0	0	0	0	0	0	0	2.14656	0	0	0	0.540435	0	0	0	0	0	0	0	0	0	0	0	0
ZNF382	0	0	0	3.00417	0	0	0	0	0	0	0	0	0	0	0	0	0	0	0	1.08627	0	0	0	0.486193	0	0.962026	10.5537	0	0	0	0	0	0	3.09523	0	0	0	1.15708	1.44756	1.20282	0	0	0	0	0	2.0868	0.797929	0	0
ZNF354A	0	0	0	0	0	0	0	0	0	0	0	0.850649	0	0	0	0	0	0	0	0	0	0	0	0.853883	0	0	1.36343	0	0	0	0	0	0	0	0	0	1.07113	0	0	0	0	0	0	0	0	0.854911	0	0	0
KLF10	0	0	0	0	0	0	0	0	0	0	0	0	0	0	0	0	0	0	0	0	0	0	0	0.829312	0	0	0	0	0	0	0	0	1.04445	0	0	0	0	0	0	0	0	0	0	0	0	1.01639	0	0	0
[truncated: 339 more columns]
