# Supplementary material for: Multiparameter functional diversity of human C2H2 zinc finger proteins
Source: Genome Res. 2016 Dec;26(12):1742–52. doi: 10.1101/gr.209643.116 (PMC5131825; doi:10.1101/gr.209643.116)
Supplement: Supplemental Material [file supp_gr.209643.116_Supplemental_Table_S7.xlsx]

## Sheet: Legend
Supplemental Table S7 (related to Figure 5): Raw SAINT output. Raw output from SAINT and CRAPome analysis and list of negative control CRAPome datasets incorporated. A total of 67639 interactions with 118 C2H2 baits are listed. Data for both experimental replicates is provided in the column "Spec".

## Sheet: CRAPome + SAINTexpress Output
Bait	Prey	PreyGene	Spec	SpecSum	AvgSpec	NumReplicates	ctrlCounts	AvgP	MaxP	TopoAvgP	TopoMaxP	SaintScore	logOddsScore	FoldChange	BFDR	boosted_by
ZNF436	Q7Z398	ZNF550	3|0	3	1.5	2	0|0|0|0|0|0|0|0|0|0|0|0|0|0|0|0|0|0|0|0|0|0|0|0|0|0|0|0|0|0|0|0|0|0|0|0|0|0|0	0.48	0.97	0.48	0.97	0.48	-3	15	0.19
ZNF594	Q96I99	SUCLG2	1|0	1	0.5	2	0|2|0|0|0|0|0|0|0|0|0|0|0|0|0|0|0|0|0|0|0|0|0|0|0|0|0|0|0|0|0|0|0|0|0|0|0|0|0	0	0	0	0	0	-3.39	2.5	0.88
KLF1	Q96I99	SUCLG2	1|0	1	0.5	2	0|2|0|0|0|0|0|0|0|0|0|0|0|0|0|0|0|0|0|0|0|0|0|0|0|0|0|0|0|0|0|0|0|0|0|0|0|0|0	0	0	0	0	0	-3.39	2.5	0.88
GTF3A	Q5MIZ7	SMEK2	1|2	3	1.5	2	0|0|0|0|0|0|0|0|0|0|0|0|0|0|0|0|0|0|0|0|0|0|0|0|0|0|0|0|0|0|0|0|0|0|0|0|0|0|0	0.41	0.82	0.41	0.82	0.41	-0.49	15	0.28
ZIM3	Q5MIZ7	SMEK2	2|0	2	1	2	0|0|0|0|0|0|0|0|0|0|0|0|0|0|0|0|0|0|0|0|0|0|0|0|0|0|0|0|0|0|0|0|0|0|0|0|0|0|0	0.41	0.82	0.41	0.82	0.41	-3	10	0.28
ZNF768	Q96N67	DOCK7	1|2	3	1.5	2	0|0|0|0|0|0|0|0|0|0|0|0|0|0|0|0|0|0|0|0|0|0|0|0|0|0|0|0|0|0|0|0|0|0|0|0|0|0|3	0.21	0.42	0.21	0.42	0.21	-1.44	5	0.42
ZNF490	Q96N67	DOCK7	2|1	3	1.5	2	0|0|0|0|0|0|0|0|0|0|0|0|0|0|0|0|0|0|0|0|0|0|0|0|0|0|0|0|0|0|0|0|0|0|0|0|0|0|3	0.21	0.42	0.21	0.42	0.21	-1.44	5	0.42
ZIM3	O00629	KPNA4	0|1	1	0.5	2	0|0|0|0|0|0|0|0|0|0|0|0|0|0|0|0|0|0|0|0|0|0|0|0|0|0|0|0|0|0|0|0|0|0|0|0|0|0|0	0	0	0	0	0	-3	5	0.88
ZNF708	O00629	KPNA4	4|3	7	3.5	2	0|0|0|0|0|0|0|0|0|0|0|0|0|0|0|0|0|0|0|0|0|0|0|0|0|0|0|0|0|0|0|0|0|0|0|0|0|0|0	0.98	0.99	0.98	0.99	0.98	3.39	35	0
FEZF1	O00629	KPNA4	5|0	5	2.5	2	0|0|0|0|0|0|0|0|0|0|0|0|0|0|0|0|0|0|0|0|0|0|0|0|0|0|0|0|0|0|0|0|0|0|0|0|0|0|0	0.5	1	0.5	1	0.5	-3	25	0.16
MAZ	O00629	KPNA4	0|1	1	0.5	2	0|0|0|0|0|0|0|0|0|0|0|0|0|0|0|0|0|0|0|0|0|0|0|0|0|0|0|0|0|0|0|0|0|0|0|0|0|0|0	0	0	0	0	0	-3	5	0.88
ZNF329	O00629	KPNA4	0|1	1	0.5	2	0|0|0|0|0|0|0|0|0|0|0|0|0|0|0|0|0|0|0|0|0|0|0|0|0|0|0|0|0|0|0|0|0|0|0|0|0|0|0	0	0	0	0	0	-3	5	0.88
OSR2	O00629	KPNA4	1|2	3	1.5	2	0|0|0|0|0|0|0|0|0|0|0|0|0|0|0|0|0|0|0|0|0|0|0|0|0|0|0|0|0|0|0|0|0|0|0|0|0|0|0	0.41	0.82	0.41	0.82	0.41	-0.49	15	0.28
KLF7	O00629	KPNA4	1|1	2	1	2	0|0|0|0|0|0|0|0|0|0|0|0|0|0|0|0|0|0|0|0|0|0|0|0|0|0|0|0|0|0|0|0|0|0|0|0|0|0|0	0	0	0	0	0	-0.49	10	0.88
ZNF669	O00629	KPNA4	0|1	1	0.5	2	0|0|0|0|0|0|0|0|0|0|0|0|0|0|0|0|0|0|0|0|0|0|0|0|0|0|0|0|0|0|0|0|0|0|0|0|0|0|0	0	0	0	0	0	-3	5	0.88
ZNF547	O00629	KPNA4	0|1	1	0.5	2	0|0|0|0|0|0|0|0|0|0|0|0|0|0|0|0|0|0|0|0|0|0|0|0|0|0|0|0|0|0|0|0|0|0|0|0|0|0|0	0	0	0	0	0	-3	5	0.88
ZNF436	O00629	KPNA4	1|5	6	3	2	0|0|0|0|0|0|0|0|0|0|0|0|0|0|0|0|0|0|0|0|0|0|0|0|0|0|0|0|0|0|0|0|0|0|0|0|0|0|0	0.5	1	0.5	1	0.5	-0.49	30	0.16
SCRT1	O00629	KPNA4	1|0	1	0.5	2	0|0|0|0|0|0|0|0|0|0|0|0|0|0|0|0|0|0|0|0|0|0|0|0|0|0|0|0|0|0|0|0|0|0|0|0|0|0|0	0	0	0	0	0	-3	5	0.88
ZNF768	O00629	KPNA4	3|6	9	4.5	2	0|0|0|0|0|0|0|0|0|0|0|0|0|0|0|0|0|0|0|0|0|0|0|0|0|0|0|0|0|0|0|0|0|0|0|0|0|0|0	0.98	1	0.98	1	0.98	3.39	45	0
KLF1	O00629	KPNA4	4|1	5	2.5	2	0|0|0|0|0|0|0|0|0|0|0|0|0|0|0|0|0|0|0|0|0|0|0|0|0|0|0|0|0|0|0|0|0|0|0|0|0|0|0	0.5	0.99	0.5	0.99	0.5	-0.49	25	0.17
ZFP82	O00629	KPNA4	2|2	4	2	2	0|0|0|0|0|0|0|0|0|0|0|0|0|0|0|0|0|0|0|0|0|0|0|0|0|0|0|0|0|0|0|0|0|0|0|0|0|0|0	0.82	0.82	0.82	0.82	0.82	1.54	20	0.04
GTF3A	O00629	KPNA4	1|1	2	1	2	0|0|0|0|0|0|0|0|0|0|0|0|0|0|0|0|0|0|0|0|0|0|0|0|0|0|0|0|0|0|0|0|0|0|0|0|0|0|0	0	0	0	0	0	-0.49	10	0.88
ZNF71	O00629	KPNA4	2|0	2	1	2	0|0|0|0|0|0|0|0|0|0|0|0|0|0|0|0|0|0|0|0|0|0|0|0|0|0|0|0|0|0|0|0|0|0|0|0|0|0|0	0.41	0.82	0.41	0.82	0.41	-3	10	0.28
ZNF594	O00629	KPNA4	1|0	1	0.5	2	0|0|0|0|0|0|0|0|0|0|0|0|0|0|0|0|0|0|0|0|0|0|0|0|0|0|0|0|0|0|0|0|0|0|0|0|0|0|0	0	0	0	0	0	-3	5	0.88
ZNF280A	O00629	KPNA4	1|1	2	1	2	0|0|0|0|0|0|0|0|0|0|0|0|0|0|0|0|0|0|0|0|0|0|0|0|0|0|0|0|0|0|0|0|0|0|0|0|0|0|0	0	0	0	0	0	-0.49	10	0.88
ZNF320	O00629	KPNA4	0|1	1	0.5	2	0|0|0|0|0|0|0|0|0|0|0|0|0|0|0|0|0|0|0|0|0|0|0|0|0|0|0|0|0|0|0|0|0|0|0|0|0|0|0	0	0	0	0	0	-3	5	0.88
ZBTB6	P20930	FLG	1|1	2	1	2	0|0|0|0|0|0|0|0|0|2|2|0|0|0|0|0|0|0|2|0|0|0|0|1|0|0|0|0|0|0|0|10|0|10|1|3|5|0|0	0	0	0	0	0	-14.07	0.28	0.88
ZNF449	P20930	FLG	0|2	2	1	2	0|0|0|0|0|0|0|0|0|2|2|0|0|0|0|0|0|0|2|0|0|0|0|1|0|0|0|0|0|0|0|10|0|10|1|3|5|0|0	0	0	0	0	0	-16.76	0.28	0.8
ZNF34	P20930	FLG	5|1	6	3	2	0|0|0|0|0|0|0|0|0|2|2|0|0|0|0|0|0|0|2|0|0|0|0|1|0|0|0|0|0|0|0|10|0|10|1|3|5|0|0	0	0	0	0	0	-14.07	0.83	0.73
SCRT1	P20930	FLG	0|2	2	1	2	0|0|0|0|0|0|0|0|0|2|2|0|0|0|0|0|0|0|2|0|0|0|0|1|0|0|0|0|0|0|0|10|0|10|1|3|5|0|0	0	0	0	0	0	-16.76	0.28	0.8
PRDM1	P20930	FLG	2|0	2	1	2	0|0|0|0|0|0|0|0|0|2|2|0|0|0|0|0|0|0|2|0|0|0|0|1|0|0|0|0|0|0|0|10|0|10|1|3|5|0|0	0	0	0	0	0	-16.76	0.28	0.8
ZFP82	P20930	FLG	3|0	3	1.5	2	0|0|0|0|0|0|0|0|0|2|2|0|0|0|0|0|0|0|2|0|0|0|0|1|0|0|0|0|0|0|0|10|0|10|1|3|5|0|0	0	0	0	0	0	-16.76	0.42	0.78
ZNF596	P20930	FLG	2|0	2	1	2	0|0|0|0|0|0|0|0|0|2|2|0|0|0|0|0|0|0|2|0|0|0|0|1|0|0|0|0|0|0|0|10|0|10|1|3|5|0|0	0	0	0	0	0	-16.76	0.28	0.8
ZNF214	P40227	CCT6A	1|0	1	0.5	2	1|6|0|0|0|0|0|0|1|0|0|0|0|0|0|1|0|0|5|0|12|0|1|0|0|4|5|4|0|8|11|8|20|8|10|4|3|3|1	0	0	0	0	0	-42.09	0.05	0.88
IKZF3	P40227	CCT6A	7|2	9	4.5	2	1|6|0|0|0|0|0|0|1|0|0|0|0|0|0|1|0|0|5|0|12|0|1|0|0|4|5|4|0|8|11|8|20|8|10|4|3|3|1	0	0	0	0	0	-35.51	0.48	0.86
ZNF331	P40227	CCT6A	1|3	4	2	2	1|6|0|0|0|0|0|0|1|0|0|0|0|0|0|1|0|0|5|0|12|0|1|0|0|4|5|4|0|8|11|8|20|8|10|4|3|3|1	0	0	0	0	0	-38.45	0.22	0.87
ZNF250	P40227	CCT6A	3|2	5	2.5	2	1|6|0|0|0|0|0|0|1|0|0|0|0|0|0|1|0|0|5|0|12|0|1|0|0|4|5|4|0|8|11|8|20|8|10|4|3|3|1	0	0	0	0	0	-35.51	0.27	0.87
GLIS1	P40227	CCT6A	1|0	1	0.5	2	1|6|0|0|0|0|0|0|1|0|0|0|0|0|0|1|0|0|5|0|12|0|1|0|0|4|5|4|0|8|11|8|20|8|10|4|3|3|1	0	0	0	0	0	-42.09	0.05	0.88
ZNF257	P40227	CCT6A	1|0	1	0.5	2	1|6|0|0|0|0|0|0|1|0|0|0|0|0|0|1|0|0|5|0|12|0|1|0|0|4|5|4|0|8|11|8|20|8|10|4|3|3|1	0	0	0	0	0	-42.09	0.05	0.88
ZNF596	P40227	CCT6A	0|5	5	2.5	2	1|6|0|0|0|0|0|0|1|0|0|0|0|0|0|1|0|0|5|0|12|0|1|0|0|4|5|4|0|8|11|8|20|8|10|4|3|3|1	0	0	0	0	0	-42.09	0.27	0.86
ZNF594	P40227	CCT6A	11|1	12	6	2	1|6|0|0|0|0|0|0|1|0|0|0|0|0|0|1|0|0|5|0|12|0|1|0|0|4|5|4|0|8|11|8|20|8|10|4|3|3|1	0	0	0	0	0	-38.45	0.65	0.84
ZNF595	P40227	CCT6A	1|0	1	0.5	2	1|6|0|0|0|0|0|0|1|0|0|0|0|0|0|1|0|0|5|0|12|0|1|0|0|4|5|4|0|8|11|8|20|8|10|4|3|3|1	0	0	0	0	0	-42.09	0.05	0.88
ZNF71	P40227	CCT6A	7|6	13	6.5	2	1|6|0|0|0|0|0|0|1|0|0|0|0|0|0|1|0|0|5|0|12|0|1|0|0|4|5|4|0|8|11|8|20|8|10|4|3|3|1	0	0	0	0	0	-26.79	0.7	0.85
ZNF816	P40227	CCT6A	0|3	3	1.5	2	1|6|0|0|0|0|0|0|1|0|0|0|0|0|0|1|0|0|5|0|12|0|1|0|0|4|5|4|0|8|11|8|20|8|10|4|3|3|1	0	0	0	0	0	-42.09	0.16	0.87
ZSCAN5C	P40227	CCT6A	1|3	4	2	2	1|6|0|0|0|0|0|0|1|0|0|0|0|0|0|1|0|0|5|0|12|0|1|0|0|4|5|4|0|8|11|8|20|8|10|4|3|3|1	0	0	0	0	0	-38.45	0.22	0.87
ZNF320	P40227	CCT6A	1|1	2	1	2	1|6|0|0|0|0|0|0|1|0|0|0|0|0|0|1|0|0|5|0|12|0|1|0|0|4|5|4|0|8|11|8|20|8|10|4|3|3|1	0	0	0	0	0	-38.45	0.11	0.88
ZNF140	P40227	CCT6A	1|2	3	1.5	2	1|6|0|0|0|0|0|0|1|0|0|0|0|0|0|1|0|0|5|0|12|0|1|0|0|4|5|4|0|8|11|8|20|8|10|4|3|3|1	0	0	0	0	0	-38.45	0.16	0.88
ZNF708	P40227	CCT6A	3|3	6	3	2	1|6|0|0|0|0|0|0|1|0|0|0|0|0|0|1|0|0|5|0|12|0|1|0|0|4|5|4|0|8|11|8|20|8|10|4|3|3|1	0	0	0	0	0	-32.96	0.32	0.86
FEZF1	P40227	CCT6A	1|1	2	1	2	1|6|0|0|0|0|0|0|1|0|0|0|0|0|0|1|0|0|5|0|12|0|1|0|0|4|5|4|0|8|11|8|20|8|10|4|3|3|1	0	0	0	0	0	-38.45	0.11	0.88
ZBTB14	P40227	CCT6A	2|1	3	1.5	2	1|6|0|0|0|0|0|0|1|0|0|0|0|0|0|1|0|0|5|0|12|0|1|0|0|4|5|4|0|8|11|8|20|8|10|4|3|3|1	0	0	0	0	0	-38.45	0.16	0.88
ZBTB42	P40227	CCT6A	1|0	1	0.5	2	1|6|0|0|0|0|0|0|1|0|0|0|0|0|0|1|0|0|5|0|12|0|1|0|0|4|5|4|0|8|11|8|20|8|10|4|3|3|1	0	0	0	0	0	-42.09	0.05	0.88
ZNF8	P40227	CCT6A	1|1	2	1	2	1|6|0|0|0|0|0|0|1|0|0|0|0|0|0|1|0|0|5|0|12|0|1|0|0|4|5|4|0|8|11|8|20|8|10|4|3|3|1	0	0	0	0	0	-38.45	0.11	0.88
ZFP3	P40227	CCT6A	0|1	1	0.5	2	1|6|0|0|0|0|0|0|1|0|0|0|0|0|0|1|0|0|5|0|12|0|1|0|0|4|5|4|0|8|11|8|20|8|10|4|3|3|1	0	0	0	0	0	-42.09	0.05	0.88
KLF7	P40227	CCT6A	4|3	7	3.5	2	1|6|0|0|0|0|0|0|1|0|0|0|0|0|0|1|0|0|5|0|12|0|1|0|0|4|5|4|0|8|11|8|20|8|10|4|3|3|1	0	0	0	0	0	-32.96	0.38	0.86
ZNF436	P40227	CCT6A	3|5	8	4	2	1|6|0|0|0|0|0|0|1|0|0|0|0|0|0|1|0|0|5|0|12|0|1|0|0|4|5|4|0|8|11|8|20|8|10|4|3|3|1	0	0	0	0	0	-32.96	0.43	0.86
ZNF768	P40227	CCT6A	9|14	23	11.5	2	1|6|0|0|0|0|0|0|1|0|0|0|0|0|0|1|0|0|5|0|12|0|1|0|0|4|5|4|0|8|11|8|20|8|10|4|3|3|1	0	0	0	0	0	-22.01	1.24	0.82
ZNF419	P40227	CCT6A	1|2	3	1.5	2	1|6|0|0|0|0|0|0|1|0|0|0|0|0|0|1|0|0|5|0|12|0|1|0|0|4|5|4|0|8|11|8|20|8|10|4|3|3|1	0	0	0	0	0	-38.45	0.16	0.88
ZIM3	P40227	CCT6A	1|1	2	1	2	1|6|0|0|0|0|0|0|1|0|0|0|0|0|0|1|0|0|5|0|12|0|1|0|0|4|5|4|0|8|11|8|20|8|10|4|3|3|1	0	0	0	0	0	-38.45	0.11	0.88
KLF1	P40227	CCT6A	9|1	10	5	2	1|6|0|0|0|0|0|0|1|0|0|0|0|0|0|1|0|0|5|0|12|0|1|0|0|4|5|4|0|8|11|8|20|8|10|4|3|3|1	0	0	0	0	0	-38.45	0.54	0.85
ZNF322	P40227	CCT6A	4|9	13	6.5	2	1|6|0|0|0|0|0|0|1|0|0|0|0|0|0|1|0|0|5|0|12|0|1|0|0|4|5|4|0|8|11|8|20|8|10|4|3|3|1	0	0	0	0	0	-30.7	0.7	0.85
ZNF189	P40227	CCT6A	1|1	2	1	2	1|6|0|0|0|0|0|0|1|0|0|0|0|0|0|1|0|0|5|0|12|0|1|0|0|4|5|4|0|8|11|8|20|8|10|4|3|3|1	0	0	0	0	0	-38.45	0.11	0.88
ZNF329	P40227	CCT6A	1|0	1	0.5	2	1|6|0|0|0|0|0|0|1|0|0|0|0|0|0|1|0|0|5|0|12|0|1|0|0|4|5|4|0|8|11|8|20|8|10|4|3|3|1	0	0	0	0	0	-42.09	0.05	0.88
OSR2	P40227	CCT6A	1|1	2	1	2	1|6|0|0|0|0|0|0|1|0|0|0|0|0|0|1|0|0|5|0|12|0|1|0|0|4|5|4|0|8|11|8|20|8|10|4|3|3|1	0	0	0	0	0	-38.45	0.11	0.88
ZNF582	P40227	CCT6A	0|2	2	1	2	1|6|0|0|0|0|0|0|1|0|0|0|0|0|0|1|0|0|5|0|12|0|1|0|0|4|5|4|0|8|11|8|20|8|10|4|3|3|1	0	0	0	0	0	-42.09	0.11	0.88
MYNN	P40227	CCT6A	1|2	3	1.5	2	1|6|0|0|0|0|0|0|1|0|0|0|0|0|0|1|0|0|5|0|12|0|1|0|0|4|5|4|0|8|11|8|20|8|10|4|3|3|1	0	0	0	0	0	-38.45	0.16	0.88
ZFP82	P40227	CCT6A	10|7	17	8.5	2	1|6|0|0|0|0|0|0|1|0|0|0|0|0|0|1|0|0|5|0|12|0|1|0|0|4|5|4|0|8|11|8|20|8|10|4|3|3|1	0	0	0	0	0	-25.08	0.91	0.84
PATZ1	P40227	CCT6A	1|1	2	1	2	1|6|0|0|0|0|0|0|1|0|0|0|0|0|0|1|0|0|5|0|12|0|1|0|0|4|5|4|0|8|11|8|20|8|10|4|3|3|1	0	0	0	0	0	-38.45	0.11	0.88
ZNF563	P40227	CCT6A	1|0	1	0.5	2	1|6|0|0|0|0|0|0|1|0|0|0|0|0|0|1|0|0|5|0|12|0|1|0|0|4|5|4|0|8|11|8|20|8|10|4|3|3|1	0	0	0	0	0	-42.09	0.05	0.88
MAZ	P40227	CCT6A	0|1	1	0.5	2	1|6|0|0|0|0|0|0|1|0|0|0|0|0|0|1|0|0|5|0|12|0|1|0|0|4|5|4|0|8|11|8|20|8|10|4|3|3|1	0	0	0	0	0	-42.09	0.05	0.88
ZNF449	P40227	CCT6A	2|1	3	1.5	2	1|6|0|0|0|0|0|0|1|0|0|0|0|0|0|1|0|0|5|0|12|0|1|0|0|4|5|4|0|8|11|8|20|8|10|4|3|3|1	0	0	0	0	0	-38.45	0.16	0.88
ZNF280A	P40227	CCT6A	1|0	1	0.5	2	1|6|0|0|0|0|0|0|1|0|0|0|0|0|0|1|0|0|5|0|12|0|1|0|0|4|5|4|0|8|11|8|20|8|10|4|3|3|1	0	0	0	0	0	-42.09	0.05	0.88
GTF3A	P40227	CCT6A	3|3	6	3	2	1|6|0|0|0|0|0|0|1|0|0|0|0|0|0|1|0|0|5|0|12|0|1|0|0|4|5|4|0|8|11|8|20|8|10|4|3|3|1	0	0	0	0	0	-32.96	0.32	0.86
ZNF547	P40227	CCT6A	1|0	1	0.5	2	1|6|0|0|0|0|0|0|1|0|0|0|0|0|0|1|0|0|5|0|12|0|1|0|0|4|5|4|0|8|11|8|20|8|10|4|3|3|1	0	0	0	0	0	-42.09	0.05	0.88
PRDM1	P40227	CCT6A	0|1	1	0.5	2	1|6|0|0|0|0|0|0|1|0|0|0|0|0|0|1|0|0|5|0|12|0|1|0|0|4|5|4|0|8|11|8|20|8|10|4|3|3|1	0	0	0	0	0	-42.09	0.05	0.88
ZNF778	P40227	CCT6A	1|0	1	0.5	2	1|6|0|0|0|0|0|0|1|0|0|0|0|0|0|1|0|0|5|0|12|0|1|0|0|4|5|4|0|8|11|8|20|8|10|4|3|3|1	0	0	0	0	0	-42.09	0.05	0.88
SCRT1	P40227	CCT6A	4|2	6	3	2	1|6|0|0|0|0|0|0|1|0|0|0|0|0|0|1|0|0|5|0|12|0|1|0|0|4|5|4|0|8|11|8|20|8|10|4|3|3|1	0	0	0	0	0	-35.51	0.32	0.86
ZNF37A	P40227	CCT6A	0|1	1	0.5	2	1|6|0|0|0|0|0|0|1|0|0|0|0|0|0|1|0|0|5|0|12|0|1|0|0|4|5|4|0|8|11|8|20|8|10|4|3|3|1	0	0	0	0	0	-42.09	0.05	0.88
ZNF394	P40227	CCT6A	2|1	3	1.5	2	1|6|0|0|0|0|0|0|1|0|0|0|0|0|0|1|0|0|5|0|12|0|1|0|0|4|5|4|0|8|11|8|20|8|10|4|3|3|1	0	0	0	0	0	-38.45	0.16	0.88
ZNF770	P40227	CCT6A	0|1	1	0.5	2	1|6|0|0|0|0|0|0|1|0|0|0|0|0|0|1|0|0|5|0|12|0|1|0|0|4|5|4|0|8|11|8|20|8|10|4|3|3|1	0	0	0	0	0	-42.09	0.05	0.88
ZSCAN30	P40227	CCT6A	3|5	8	4	2	1|6|0|0|0|0|0|0|1|0|0|0|0|0|0|1|0|0|5|0|12|0|1|0|0|4|5|4|0|8|11|8|20|8|10|4|3|3|1	0	0	0	0	0	-32.96	0.43	0.86
KLF7	Q96NU1	SAMD11	0|2	2	1	2	0|0|0|0|0|0|0|0|0|0|0|0|0|0|0|0|0|0|0|0|1|0|0|0|0|0|0|0|0|1|0|0|0|0|0|0|0|0|0	0.25	0.5	0.25	0.5	0.25	-3.36	5	0.39
ZNF708	P13693	TPT1	2|0	2	1	2	0|4|0|0|0|0|0|0|0|0|0|0|0|0|0|0|0|0|0|0|2|0|0|0|0|0|0|0|0|0|0|0|1|0|2|0|0|0|0	0.04	0.07	0.04	0.07	0.04	-6.06	1.11	0.58
ZNF419	P13693	TPT1	0|1	1	0.5	2	0|4|0|0|0|0|0|0|0|0|0|0|0|0|0|0|0|0|0|0|2|0|0|0|0|0|0|0|0|0|0|0|1|0|2|0|0|0|0	0	0	0	0	0	-6.06	0.56	0.88
ZNF322	P13693	TPT1	5|8	13	6.5	2	0|4|0|0|0|0|0|0|0|0|0|0|0|0|0|0|0|0|0|0|2|0|0|0|0|0|0|0|0|0|0|0|1|0|2|0|0|0|0	0.68	0.87	0.68	0.87	0.68	-0.05	7.22	0.08
MAZ	P13693	TPT1	0|7	7	3.5	2	0|4|0|0|0|0|0|0|0|0|0|0|0|0|0|0|0|0|0|0|2|0|0|0|0|0|0|0|0|0|0|0|1|0|2|0|0|0|0	0.39	0.78	0.39	0.78	0.39	-6.06	3.89	0.34
ZNF436	P13693	TPT1	4|0	4	2	2	0|4|0|0|0|0|0|0|0|0|0|0|0|0|0|0|0|0|0|0|2|0|0|0|0|0|0|0|0|0|0|0|1|0|2|0|0|0|0	0.16	0.32	0.16	0.32	0.16	-6.06	2.22	0.46
KLF1	P13693	TPT1	9|0	9	4.5	2	0|4|0|0|0|0|0|0|0|0|0|0|0|0|0|0|0|0|0|0|2|0|0|0|0|0|0|0|0|0|0|0|1|0|2|0|0|0|0	0.46	0.92	0.46	0.92	0.46	-6.06	5	0.23
ZSCAN30	P13693	TPT1	0|1	1	0.5	2	0|4|0|0|0|0|0|0|0|0|0|0|0|0|0|0|0|0|0|0|2|0|0|0|0|0|0|0|0|0|0|0|1|0|2|0|0|0|0	0	0	0	0	0	-6.06	0.56	0.88
IKZF3	P13693	TPT1	6|0	6	3	2	0|4|0|0|0|0|0|0|0|0|0|0|0|0|0|0|0|0|0|0|2|0|0|0|0|0|0|0|0|0|0|0|1|0|2|0|0|0|0	0.32	0.65	0.32	0.65	0.32	-6.06	3.33	0.36
ZNF320	P13693	TPT1	1|0	1	0.5	2	0|4|0|0|0|0|0|0|0|0|0|0|0|0|0|0|0|0|0|0|2|0|0|0|0|0|0|0|0|0|0|0|1|0|2|0|0|0|0	0	0	0	0	0	-6.06	0.56	0.88
ZNF708	P53567	CEBPG	1|1	2	1	2	0|1|0|0|0|0|0|0|0|0|0|0|0|0|0|0|0|0|0|0|0|0|0|0|0|0|0|0|0|0|0|0|0|0|0|0|0|0|0	0	0	0	0	0	-0.68	10	0.88
FEZF1	P53567	CEBPG	1|0	1	0.5	2	0|1|0|0|0|0|0|0|0|0|0|0|0|0|0|0|0|0|0|0|0|0|0|0|0|0|0|0|0|0|0|0|0|0|0|0|0|0|0	0	0	0	0	0	-2.99	5	0.88
ZNF594	P53567	CEBPG	2|2	4	2	2	0|1|0|0|0|0|0|0|0|0|0|0|0|0|0|0|0|0|0|0|0|0|0|0|0|0|0|0|0|0|0|0|0|0|0|0|0|0|0	0.91	0.91	0.91	0.91	0.91	2.31	20	0.02
ZNF322	P53567	CEBPG	1|2	3	1.5	2	0|1|0|0|0|0|0|0|0|0|0|0|0|0|0|0|0|0|0|0|0|0|0|0|0|0|0|0|0|0|0|0|0|0|0|0|0|0|0	0.45	0.91	0.45	0.91	0.45	-0.68	15	0.23
MAZ	P53567	CEBPG	2|1	3	1.5	2	0|1|0|0|0|0|0|0|0|0|0|0|0|0|0|0|0|0|0|0|0|0|0|0|0|0|0|0|0|0|0|0|0|0|0|0|0|0|0	0.45	0.91	0.45	0.91	0.45	-0.68	15	0.23
KLF7	P53567	CEBPG	0|1	1	0.5	2	0|1|0|0|0|0|0|0|0|0|0|0|0|0|0|0|0|0|0|0|0|0|0|0|0|0|0|0|0|0|0|0|0|0|0|0|0|0|0	0	0	0	0	0	-2.99	5	0.88
ZNF768	P53567	CEBPG	1|0	1	0.5	2	0|1|0|0|0|0|0|0|0|0|0|0|0|0|0|0|0|0|0|0|0|0|0|0|0|0|0|0|0|0|0|0|0|0|0|0|0|0|0	0	0	0	0	0	-2.99	5	0.88
ZNF582	P53567	CEBPG	1|2	3	1.5	2	0|1|0|0|0|0|0|0|0|0|0|0|0|0|0|0|0|0|0|0|0|0|0|0|0|0|0|0|0|0|0|0|0|0|0|0|0|0|0	0.45	0.91	0.45	0.91	0.45	-0.68	15	0.23
SCRT1	P53567	CEBPG	2|2	4	2	2	0|1|0|0|0|0|0|0|0|0|0|0|0|0|0|0|0|0|0|0|0|0|0|0|0|0|0|0|0|0|0|0|0|0|0|0|0|0|0	0.91	0.91	0.91	0.91	0.91	2.31	20	0.02
PRDM1	P53567	CEBPG	2|2	4	2	2	0|1|0|0|0|0|0|0|0|0|0|0|0|0|0|0|0|0|0|0|0|0|0|0|0|0|0|0|0|0|0|0|0|0|0|0|0|0|0	0.91	0.91	0.91	0.91	0.91	2.31	20	0.02
KLF1	P53567	CEBPG	4|1	5	2.5	2	0|1|0|0|0|0|0|0|0|0|0|0|0|0|0|0|0|0|0|0|0|0|0|0|0|0|0|0|0|0|0|0|0|0|0|0|0|0|0	0.5	1	0.5	1	0.5	-0.68	25	0.15
PATZ1	P53567	CEBPG	2|0	2	1	2	0|1|0|0|0|0|0|0|0|0|0|0|0|0|0|0|0|0|0|0|0|0|0|0|0|0|0|0|0|0|0|0|0|0|0|0|0|0|0	0.45	0.91	0.45	0.91	0.45	-2.99	10	0.23
ZNF436	P53567	CEBPG	0|2	2	1	2	0|1|0|0|0|0|0|0|0|0|0|0|0|0|0|0|0|0|0|0|0|0|0|0|0|0|0|0|0|0|0|0|0|0|0|0|0|0|0	0.45	0.91	0.45	0.91	0.45	-2.99	10	0.23
ZSCAN5C	P53567	CEBPG	2|2	4	2	2	0|1|0|0|0|0|0|0|0|0|0|0|0|0|0|0|0|0|0|0|0|0|0|0|0|0|0|0|0|0|0|0|0|0|0|0|0|0|0	0.91	0.91	0.91	0.91	0.91	2.31	20	0.02
ZSCAN30	P53567	CEBPG	0|2	2	1	2	0|1|0|0|0|0|0|0|0|0|0|0|0|0|0|0|0|0|0|0|0|0|0|0|0|0|0|0|0|0|0|0|0|0|0|0|0|0|0	0.45	0.91	0.45	0.91	0.45	-2.99	10	0.23
ZIM3	Q9NQT8	KIF13B	0|1	1	0.5	2	0|0|0|0|0|1|0|0|0|0|0|0|0|0|0|0|0|0|0|0|0|0|0|0|0|0|0|0|0|0|0|0|0|0|0|0|0|0|0	0	0	0	0	0	-2.99	5	0.88
ZNF331	Q9NQT8	KIF13B	1|0	1	0.5	2	0|0|0|0|0|1|0|0|0|0|0|0|0|0|0|0|0|0|0|0|0|0|0|0|0|0|0|0|0|0|0|0|0|0|0|0|0|0|0	0	0	0	0	0	-2.99	5	0.88
ZNF490	Q12905	ILF2	4|4	8	4	2	3|21|2|0|0|1|0|0|0|0|0|2|1|0|2|5|2|0|12|7|14|1|3|1|4|8|10|5|0|23|10|3|16|3|8|0|1|9|7	0	0	0	0	0	-46.24	0.31	0.88
ZNF331	Q12905	ILF2	5|18	23	11.5	2	3|21|2|0|0|1|0|0|0|0|0|2|1|0|2|5|2|0|12|7|14|1|3|1|4|8|10|5|0|23|10|3|16|3|8|0|1|9|7	0	0	0	0	0	-43.86	0.88	0.85
ZNF250	Q12905	ILF2	9|12	21	10.5	2	3|21|2|0|0|1|0|0|0|0|0|2|1|0|2|5|2|0|12|7|14|1|3|1|4|8|10|5|0|23|10|3|16|3|8|0|1|9|7	0	0	0	0	0	-35.88	0.8	0.86
GLIS1	Q12905	ILF2	10|7	17	8.5	2	3|21|2|0|0|1|0|0|0|0|0|2|1|0|2|5|2|0|12|7|14|1|3|1|4|8|10|5|0|23|10|3|16|3|8|0|1|9|7	0	0	0	0	0	-39.6	0.65	0.87
ZNF595	Q12905	ILF2	0|1	1	0.5	2	3|21|2|0|0|1|0|0|0|0|0|2|1|0|2|5|2|0|12|7|14|1|3|1|4|8|10|5|0|23|10|3|16|3|8|0|1|9|7	0	0	0	0	0	-58.99	0.04	0.88
ZSCAN5C	Q12905	ILF2	10|11	21	10.5	2	3|21|2|0|0|1|0|0|0|0|0|2|1|0|2|5|2|0|12|7|14|1|3|1|4|8|10|5|0|23|10|3|16|3|8|0|1|9|7	0	0	0	0	0	-34.17	0.8	0.86
ZNF596	Q12905	ILF2	9|11	20	10	2	3|21|2|0|0|1|0|0|0|0|0|2|1|0|2|5|2|0|12|7|14|1|3|1|4|8|10|5|0|23|10|3|16|3|8|0|1|9|7	0	0	0	0	0	-35.88	0.76	0.86
ZNF594	Q12905	ILF2	22|5	27	13.5	2	3|21|2|0|0|1|0|0|0|0|0|2|1|0|2|5|2|0|12|7|14|1|3|1|4|8|10|5|0|23|10|3|16|3|8|0|1|9|7	0	0	0	0	0	-43.86	1.03	0.83
ZNF419	Q12905	ILF2	5|9	14	7	2	3|21|2|0|0|1|0|0|0|0|0|2|1|0|2|5|2|0|12|7|14|1|3|1|4|8|10|5|0|23|10|3|16|3|8|0|1|9|7	0	0	0	0	0	-43.86	0.53	0.87
ZNF16	Q12905	ILF2	5|1	6	3	2	3|21|2|0|0|1|0|0|0|0|0|2|1|0|2|5|2|0|12|7|14|1|3|1|4|8|10|5|0|23|10|3|16|3|8|0|1|9|7	0	0	0	0	0	-55.01	0.23	0.87
ZNF71	Q12905	ILF2	12|13	25	12.5	2	3|21|2|0|0|1|0|0|0|0|0|2|1|0|2|5|2|0|12|7|14|1|3|1|4|8|10|5|0|23|10|3|16|3|8|0|1|9|7	0	0	0	0	0	-31.03	0.95	0.86
ZNF816	Q12905	ILF2	0|1	1	0.5	2	3|21|2|0|0|1|0|0|0|0|0|2|1|0|2|5|2|0|12|7|14|1|3|1|4|8|10|5|0|23|10|3|16|3|8|0|1|9|7	0	0	0	0	0	-58.99	0.04	0.88
IKZF3	Q12905	ILF2	21|15	36	18	2	3|21|2|0|0|1|0|0|0|0|0|2|1|0|2|5|2|0|12|7|14|1|3|1|4|8|10|5|0|23|10|3|16|3|8|0|1|9|7	0	0	0	0	0	-26.71	1.37	0.84
ZBTB6	Q12905	ILF2	2|2	4	2	2	3|21|2|0|0|1|0|0|0|0|0|2|1|0|2|5|2|0|12|7|14|1|3|1|4|8|10|5|0|23|10|3|16|3|8|0|1|9|7	0	0	0	0	0	-51.72	0.15	0.88
ZNF140	Q12905	ILF2	3|2	5	2.5	2	3|21|2|0|0|1|0|0|0|0|0|2|1|0|2|5|2|0|12|7|14|1|3|1|4|8|10|5|0|23|10|3|16|3|8|0|1|9|7	0	0	0	0	0	-51.72	0.19	0.88
ZNF708	Q12905	ILF2	8|9	17	8.5	2	3|21|2|0|0|1|0|0|0|0|0|2|1|0|2|5|2|0|12|7|14|1|3|1|4|8|10|5|0|23|10|3|16|3|8|0|1|9|7	0	0	0	0	0	-37.68	0.65	0.87
FEZF1	Q12905	ILF2	11|14	25	12.5	2	3|21|2|0|0|1|0|0|0|0|0|2|1|0|2|5|2|0|12|7|14|1|3|1|4|8|10|5|0|23|10|3|16|3|8|0|1|9|7	0	0	0	0	0	-32.56	0.95	0.86
MZF1	Q12905	ILF2	5|4	9	4.5	2	3|21|2|0|0|1|0|0|0|0|0|2|1|0|2|5|2|0|12|7|14|1|3|1|4|8|10|5|0|23|10|3|16|3|8|0|1|9|7	0	0	0	0	0	-46.24	0.34	0.87
ZBTB14	Q12905	ILF2	6|3	9	4.5	2	3|21|2|0|0|1|0|0|0|0|0|2|1|0|2|5|2|0|12|7|14|1|3|1|4|8|10|5|0|23|10|3|16|3|8|0|1|9|7	0	0	0	0	0	-48.84	0.34	0.87
ZBTB42	Q12905	ILF2	1|0	1	0.5	2	3|21|2|0|0|1|0|0|0|0|0|2|1|0|2|5|2|0|12|7|14|1|3|1|4|8|10|5|0|23|10|3|16|3|8|0|1|9|7	0	0	0	0	0	-58.99	0.04	0.88
KLF7	Q12905	ILF2	9|12	21	10.5	2	3|21|2|0|0|1|0|0|0|0|0|2|1|0|2|5|2|0|12|7|14|1|3|1|4|8|10|5|0|23|10|3|16|3|8|0|1|9|7	0	0	0	0	0	-35.88	0.8	0.86
ZNF436	Q12905	ILF2	10|14	24	12	2	3|21|2|0|0|1|0|0|0|0|0|2|1|0|2|5|2|0|12|7|14|1|3|1|4|8|10|5|0|23|10|3|16|3|8|0|1|9|7	0	0	0	0	0	-34.17	0.92	0.86
ZNF768	Q12905	ILF2	17|16	33	16.5	2	3|21|2|0|0|1|0|0|0|0|0|2|1|0|2|5|2|0|12|7|14|1|3|1|4|8|10|5|0|23|10|3|16|3|8|0|1|9|7	0	0	0	0	0	-25.32	1.26	0.85
KLF1	Q12905	ILF2	20|6	26	13	2	3|21|2|0|0|1|0|0|0|0|0|2|1|0|2|5|2|0|12|7|14|1|3|1|4|8|10|5|0|23|10|3|16|3|8|0|1|9|7	0	0	0	0	0	-41.66	0.99	0.84
ZIM3	Q12905	ILF2	0|6	6	3	2	3|21|2|0|0|1|0|0|0|0|0|2|1|0|2|5|2|0|12|7|14|1|3|1|4|8|10|5|0|23|10|3|16|3|8|0|1|9|7	0	0	0	0	0	-58.99	0.23	0.87
ZNF184	Q12905	ILF2	2|3	5	2.5	2	3|21|2|0|0|1|0|0|0|0|0|2|1|0|2|5|2|0|12|7|14|1|3|1|4|8|10|5|0|23|10|3|16|3|8|0|1|9|7	0	0	0	0	0	-51.72	0.19	0.88
ZFP28	Q12905	ILF2	1|2	3	1.5	2	3|21|2|0|0|1|0|0|0|0|0|2|1|0|2|5|2|0|12|7|14|1|3|1|4|8|10|5|0|23|10|3|16|3|8|0|1|9|7	0	0	0	0	0	-55.01	0.11	0.88
ZNF320	Q12905	ILF2	11|6	17	8.5	2	3|21|2|0|0|1|0|0|0|0|0|2|1|0|2|5|2|0|12|7|14|1|3|1|4|8|10|5|0|23|10|3|16|3|8|0|1|9|7	0	0	0	0	0	-41.66	0.65	0.87
ZNF322	Q12905	ILF2	18|21	39	19.5	2	3|21|2|0|0|1|0|0|0|0|0|2|1|0|2|5|2|0|12|7|14|1|3|1|4|8|10|5|0|23|10|3|16|3|8|0|1|9|7	0	0	0	0	0	-22.67	1.49	0.84
ZNF189	Q12905	ILF2	1|2	3	1.5	2	3|21|2|0|0|1|0|0|0|0|0|2|1|0|2|5|2|0|12|7|14|1|3|1|4|8|10|5|0|23|10|3|16|3|8|0|1|9|7	0	0	0	0	0	-55.01	0.11	0.88
ZNF34	Q12905	ILF2	4|7	11	5.5	2	3|21|2|0|0|1|0|0|0|0|0|2|1|0|2|5|2|0|12|7|14|1|3|1|4|8|10|5|0|23|10|3|16|3|8|0|1|9|7	0	0	0	0	0	-46.24	0.42	0.87
ZNF329	Q12905	ILF2	4|11	15	7.5	2	3|21|2|0|0|1|0|0|0|0|0|2|1|0|2|5|2|0|12|7|14|1|3|1|4|8|10|5|0|23|10|3|16|3|8|0|1|9|7	0	0	0	0	0	-46.24	0.57	0.87
OSR2	Q12905	ILF2	7|11	18	9	2	3|21|2|0|0|1|0|0|0|0|0|2|1|0|2|5|2|0|12|7|14|1|3|1|4|8|10|5|0|23|10|3|16|3|8|0|1|9|7	0	0	0	0	0	-39.6	0.69	0.86
ZNF582	Q12905	ILF2	0|3	3	1.5	2	3|21|2|0|0|1|0|0|0|0|0|2|1|0|2|5|2|0|12|7|14|1|3|1|4|8|10|5|0|23|10|3|16|3|8|0|1|9|7	0	0	0	0	0	-58.99	0.11	0.88
MYNN	Q12905	ILF2	8|8	16	8	2	3|21|2|0|0|1|0|0|0|0|0|2|1|0|2|5|2|0|12|7|14|1|3|1|4|8|10|5|0|23|10|3|16|3|8|0|1|9|7	0	0	0	0	0	-37.68	0.61	0.87
ZFP82	Q12905	ILF2	18|21	39	19.5	2	3|21|2|0|0|1|0|0|0|0|0|2|1|0|2|5|2|0|12|7|14|1|3|1|4|8|10|5|0|23|10|3|16|3|8|0|1|9|7	0	0	0	0	0	-22.67	1.49	0.84
PATZ1	Q12905	ILF2	8|14	22	11	2	3|21|2|0|0|1|0|0|0|0|0|2|1|0|2|5|2|0|12|7|14|1|3|1|4|8|10|5|0|23|10|3|16|3|8|0|1|9|7	0	0	0	0	0	-37.68	0.84	0.86
ZNF394	Q12905	ILF2	6|2	8	4	2	3|21|2|0|0|1|0|0|0|0|0|2|1|0|2|5|2|0|12|7|14|1|3|1|4|8|10|5|0|23|10|3|16|3|8|0|1|9|7	0	0	0	0	0	-51.72	0.31	0.87
MAZ	Q12905	ILF2	7|28	35	17.5	2	3|21|2|0|0|1|0|0|0|0|0|2|1|0|2|5|2|0|12|7|14|1|3|1|4|8|10|5|0|23|10|3|16|3|8|0|1|9|7	0	0	0	0	0	-39.6	1.34	0.79
ZNF449	Q12905	ILF2	13|2	15	7.5	2	3|21|2|0|0|1|0|0|0|0|0|2|1|0|2|5|2|0|12|7|14|1|3|1|4|8|10|5|0|23|10|3|16|3|8|0|1|9|7	0	0	0	0	0	-51.72	0.57	0.86
ZNF280A	Q12905	ILF2	0|2	2	1	2	3|21|2|0|0|1|0|0|0|0|0|2|1|0|2|5|2|0|12|7|14|1|3|1|4|8|10|5|0|23|10|3|16|3|8|0|1|9|7	0	0	0	0	0	-58.99	0.08	0.88
GTF3A	Q12905	ILF2	11|7	18	9	2	3|21|2|0|0|1|0|0|0|0|0|2|1|0|2|5|2|0|12|7|14|1|3|1|4|8|10|5|0|23|10|3|16|3|8|0|1|9|7	0	0	0	0	0	-39.6	0.69	0.86
ZNF547	Q12905	ILF2	7|3	10	5	2	3|21|2|0|0|1|0|0|0|0|0|2|1|0|2|5|2|0|12|7|14|1|3|1|4|8|10|5|0|23|10|3|16|3|8|0|1|9|7	0	0	0	0	0	-48.84	0.38	0.87
PRDM1	Q12905	ILF2	8|12	20	10	2	3|21|2|0|0|1|0|0|0|0|0|2|1|0|2|5|2|0|12|7|14|1|3|1|4|8|10|5|0|23|10|3|16|3|8|0|1|9|7	0	0	0	0	0	-37.68	0.76	0.86
ZNF778	Q12905	ILF2	1|1	2	1	2	3|21|2|0|0|1|0|0|0|0|0|2|1|0|2|5|2|0|12|7|14|1|3|1|4|8|10|5|0|23|10|3|16|3|8|0|1|9|7	0	0	0	0	0	-55.01	0.08	0.88
SCRT1	Q12905	ILF2	14|9	23	11.5	2	3|21|2|0|0|1|0|0|0|0|0|2|1|0|2|5|2|0|12|7|14|1|3|1|4|8|10|5|0|23|10|3|16|3|8|0|1|9|7	0	0	0	0	0	-35.88	0.88	0.86
ZNF667	Q12905	ILF2	1|0	1	0.5	2	3|21|2|0|0|1|0|0|0|0|0|2|1|0|2|5|2|0|12|7|14|1|3|1|4|8|10|5|0|23|10|3|16|3|8|0|1|9|7	0	0	0	0	0	-58.99	0.04	0.88
ZNF563	Q12905	ILF2	9|13	22	11	2	3|21|2|0|0|1|0|0|0|0|0|2|1|0|2|5|2|0|12|7|14|1|3|1|4|8|10|5|0|23|10|3|16|3|8|0|1|9|7	0	0	0	0	0	-35.88	0.84	0.86
ZNF770	Q12905	ILF2	0|3	3	1.5	2	3|21|2|0|0|1|0|0|0|0|0|2|1|0|2|5|2|0|12|7|14|1|3|1|4|8|10|5|0|23|10|3|16|3|8|0|1|9|7	0	0	0	0	0	-58.99	0.11	0.88
ZSCAN30	Q12905	ILF2	14|16	30	15	2	3|21|2|0|0|1|0|0|0|0|0|2|1|0|2|5|2|0|12|7|14|1|3|1|4|8|10|5|0|23|10|3|16|3|8|0|1|9|7	0	0	0	0	0	-28.12	1.15	0.86
KLF1	Q13724	MOGS	3|0	3	1.5	2	0|1|0|0|0|0|0|0|0|0|0|0|0|0|0|0|0|0|0|0|0|0|0|0|0|0|2|0|0|0|0|0|2|0|0|0|0|0|0	0.21	0.42	0.21	0.42	0.21	-4.47	3	0.42
ZNF322	Q13724	MOGS	2|0	2	1	2	0|1|0|0|0|0|0|0|0|0|0|0|0|0|0|0|0|0|0|0|0|0|0|0|0|0|2|0|0|0|0|0|2|0|0|0|0|0|0	0.09	0.19	0.09	0.19	0.09	-4.47	2	0.5
MAZ	Q13724	MOGS	0|1	1	0.5	2	0|1|0|0|0|0|0|0|0|0|0|0|0|0|0|0|0|0|0|0|0|0|0|0|0|0|2|0|0|0|0|0|2|0|0|0|0|0|0	0	0	0	0	0	-4.47	1	0.88
ZNF768	Q13724	MOGS	0|1	1	0.5	2	0|1|0|0|0|0|0|0|0|0|0|0|0|0|0|0|0|0|0|0|0|0|0|0|0|0|2|0|0|0|0|0|2|0|0|0|0|0|0	0	0	0	0	0	-4.47	1	0.88
ZNF594	Q13724	MOGS	1|0	1	0.5	2	0|1|0|0|0|0|0|0|0|0|0|0|0|0|0|0|0|0|0|0|0|0|0|0|0|0|2|0|0|0|0|0|2|0|0|0|0|0|0	0	0	0	0	0	-4.47	1	0.88
ZSCAN30	Q13724	MOGS	1|2	3	1.5	2	0|1|0|0|0|0|0|0|0|0|0|0|0|0|0|0|0|0|0|0|0|0|0|0|0|0|2|0|0|0|0|0|2|0|0|0|0|0|0	0.09	0.19	0.09	0.19	0.09	-2.71	3	0.5
ZNF768	P59665	DEFA1B;DEFA1	3|0	3	1.5	2	0|0|0|0|0|0|0|0|0|0|0|0|0|0|0|0|0|0|0|0|0|0|0|0|0|0|0|0|0|0|1|2|0|2|0|0|0|0|0	0.21	0.42	0.21	0.42	0.21	-4.47	3	0.42
ZNF322	P84077	ARF1	0|11	11	5.5	2	0|0|0|0|0|0|0|0|0|0|0|0|0|0|0|0|0|0|0|0|0|0|0|0|0|0|0|0|0|5|6|5|6|5|5|3|4|0|0	0.12	0.23	0.12	0.23	0.12	-18.5	1.41	0.49
ZNF816	P17509	HOXB6	1|0	1	0.5	2	0|0|0|0|0|0|0|0|0|0|0|0|0|0|0|0|0|0|0|0|0|0|0|0|0|0|0|0|0|0|0|0|0|0|0|0|0|0|0	0	0	0	0	0	-3	5	0.88
ZNF667	P17509	HOXB6	1|1	2	1	2	0|0|0|0|0|0|0|0|0|0|0|0|0|0|0|0|0|0|0|0|0|0|0|0|0|0|0|0|0|0|0|0|0|0|0|0|0|0|0	0	0	0	0	0	-0.49	10	0.88
ZNF418	P17509	HOXB6	1|0	1	0.5	2	0|0|0|0|0|0|0|0|0|0|0|0|0|0|0|0|0|0|0|0|0|0|0|0|0|0|0|0|0|0|0|0|0|0|0|0|0|0|0	0	0	0	0	0	-3	5	0.88
ZNF595	P17509	HOXB6	1|0	1	0.5	2	0|0|0|0|0|0|0|0|0|0|0|0|0|0|0|0|0|0|0|0|0|0|0|0|0|0|0|0|0|0|0|0|0|0|0|0|0|0|0	0	0	0	0	0	-3	5	0.88
ZNF214	Q8N5F7	NKAP	2|1	3	1.5	2	0|0|0|0|0|0|0|0|0|0|0|2|2|0|3|0|1|0|0|0|0|0|0|3|2|0|0|0|0|0|0|1|1|1|1|0|0|0|0	0	0	0	0	0	-7.15	0.88	0.69
GLIS1	Q8N5F7	NKAP	4|0	4	2	2	0|0|0|0|0|0|0|0|0|0|0|2|2|0|3|0|1|0|0|0|0|0|0|3|2|0|0|0|0|0|0|1|1|1|1|0|0|0|0	0.03	0.05	0.03	0.05	0.03	-9.08	1.18	0.6
ZNF257	Q8N5F7	NKAP	2|2	4	2	2	0|0|0|0|0|0|0|0|0|0|0|2|2|0|3|0|1|0|0|0|0|0|0|3|2|0|0|0|0|0|0|1|1|1|1|0|0|0|0	0	0	0	0	0	-5.63	1.18	0.67
ZNF595	Q8N5F7	NKAP	2|2	4	2	2	0|0|0|0|0|0|0|0|0|0|0|2|2|0|3|0|1|0|0|0|0|0|0|3|2|0|0|0|0|0|0|1|1|1|1|0|0|0|0	0	0	0	0	0	-5.63	1.18	0.67
ZNF16	Q8N5F7	NKAP	1|2	3	1.5	2	0|0|0|0|0|0|0|0|0|0|0|2|2|0|3|0|1|0|0|0|0|0|0|3|2|0|0|0|0|0|0|1|1|1|1|0|0|0|0	0	0	0	0	0	-7.15	0.88	0.69
ZNF816	Q8N5F7	NKAP	2|2	4	2	2	0|0|0|0|0|0|0|0|0|0|0|2|2|0|3|0|1|0|0|0|0|0|0|3|2|0|0|0|0|0|0|1|1|1|1|0|0|0|0	0	0	0	0	0	-5.63	1.18	0.67
ZNF140	Q8N5F7	NKAP	2|0	2	1	2	0|0|0|0|0|0|0|0|0|0|0|2|2|0|3|0|1|0|0|0|0|0|0|3|2|0|0|0|0|0|0|1|1|1|1|0|0|0|0	0	0	0	0	0	-9.08	0.59	0.69
FEZF1	Q8N5F7	NKAP	1|0	1	0.5	2	0|0|0|0|0|0|0|0|0|0|0|2|2|0|3|0|1|0|0|0|0|0|0|3|2|0|0|0|0|0|0|1|1|1|1|0|0|0|0	0	0	0	0	0	-9.08	0.29	0.88
ZFP3	Q8N5F7	NKAP	1|2	3	1.5	2	0|0|0|0|0|0|0|0|0|0|0|2|2|0|3|0|1|0|0|0|0|0|0|3|2|0|0|0|0|0|0|1|1|1|1|0|0|0|0	0	0	0	0	0	-7.15	0.88	0.69
KLF7	Q8N5F7	NKAP	0|3	3	1.5	2	0|0|0|0|0|0|0|0|0|0|0|2|2|0|3|0|1|0|0|0|0|0|0|3|2|0|0|0|0|0|0|1|1|1|1|0|0|0|0	0.01	0.01	0.01	0.01	0.01	-9.08	0.88	0.65
ZNF418	Q8N5F7	NKAP	2|2	4	2	2	0|0|0|0|0|0|0|0|0|0|0|2|2|0|3|0|1|0|0|0|0|0|0|3|2|0|0|0|0|0|0|1|1|1|1|0|0|0|0	0	0	0	0	0	-5.63	1.18	0.67
ZNF513	Q8N5F7	NKAP	1|2	3	1.5	2	0|0|0|0|0|0|0|0|0|0|0|2|2|0|3|0|1|0|0|0|0|0|0|3|2|0|0|0|0|0|0|1|1|1|1|0|0|0|0	0	0	0	0	0	-7.15	0.88	0.69
ZNF667	Q8N5F7	NKAP	1|2	3	1.5	2	0|0|0|0|0|0|0|0|0|0|0|2|2|0|3|0|1|0|0|0|0|0|0|3|2|0|0|0|0|0|0|1|1|1|1|0|0|0|0	0	0	0	0	0	-7.15	0.88	0.69
ZNF184	Q8N5F7	NKAP	0|1	1	0.5	2	0|0|0|0|0|0|0|0|0|0|0|2|2|0|3|0|1|0|0|0|0|0|0|3|2|0|0|0|0|0|0|1|1|1|1|0|0|0|0	0	0	0	0	0	-9.08	0.29	0.88
ZFP28	Q8N5F7	NKAP	2|2	4	2	2	0|0|0|0|0|0|0|0|0|0|0|2|2|0|3|0|1|0|0|0|0|0|0|3|2|0|0|0|0|0|0|1|1|1|1|0|0|0|0	0	0	0	0	0	-5.63	1.18	0.67
ZNF329	Q8N5F7	NKAP	1|0	1	0.5	2	0|0|0|0|0|0|0|0|0|0|0|2|2|0|3|0|1|0|0|0|0|0|0|3|2|0|0|0|0|0|0|1|1|1|1|0|0|0|0	0	0	0	0	0	-9.08	0.29	0.88
ZNF189	Q8N5F7	NKAP	2|2	4	2	2	0|0|0|0|0|0|0|0|0|0|0|2|2|0|3|0|1|0|0|0|0|0|0|3|2|0|0|0|0|0|0|1|1|1|1|0|0|0|0	0	0	0	0	0	-5.63	1.18	0.67
ZNF610	Q8N5F7	NKAP	2|2	4	2	2	0|0|0|0|0|0|0|0|0|0|0|2|2|0|3|0|1|0|0|0|0|0|0|3|2|0|0|0|0|0|0|1|1|1|1|0|0|0|0	0	0	0	0	0	-5.63	1.18	0.67
ZNF502	Q8N5F7	NKAP	1|1	2	1	2	0|0|0|0|0|0|0|0|0|0|0|2|2|0|3|0|1|0|0|0|0|0|0|3|2|0|0|0|0|0|0|1|1|1|1|0|0|0|0	0	0	0	0	0	-7.15	0.59	0.88
ZBTB42	Q8N5F7	NKAP	2|1	3	1.5	2	0|0|0|0|0|0|0|0|0|0|0|2|2|0|3|0|1|0|0|0|0|0|0|3|2|0|0|0|0|0|0|1|1|1|1|0|0|0|0	0	0	0	0	0	-7.15	0.88	0.69
PRDM1	Q8N5F7	NKAP	3|0	3	1.5	2	0|0|0|0|0|0|0|0|0|0|0|2|2|0|3|0|1|0|0|0|0|0|0|3|2|0|0|0|0|0|0|1|1|1|1|0|0|0|0	0.01	0.01	0.01	0.01	0.01	-9.08	0.88	0.65
ZNF778	Q8N5F7	NKAP	2|2	4	2	2	0|0|0|0|0|0|0|0|0|0|0|2|2|0|3|0|1|0|0|0|0|0|0|3|2|0|0|0|0|0|0|1|1|1|1|0|0|0|0	0	0	0	0	0	-5.63	1.18	0.67
ZNF37A	Q8N5F7	NKAP	2|2	4	2	2	0|0|0|0|0|0|0|0|0|0|0|2|2|0|3|0|1|0|0|0|0|0|0|3|2|0|0|0|0|0|0|1|1|1|1|0|0|0|0	0	0	0	0	0	-5.63	1.18	0.67
ZNF549	Q8N5F7	NKAP	2|2	4	2	2	0|0|0|0|0|0|0|0|0|0|0|2|2|0|3|0|1|0|0|0|0|0|0|3|2|0|0|0|0|0|0|1|1|1|1|0|0|0|0	0	0	0	0	0	-5.63	1.18	0.67
ZNF770	Q8N5F7	NKAP	2|2	4	2	2	0|0|0|0|0|0|0|0|0|0|0|2|2|0|3|0|1|0|0|0|0|0|0|3|2|0|0|0|0|0|0|1|1|1|1|0|0|0|0	0	0	0	0	0	-5.63	1.18	0.67
ZNF214	Q9BUF5	TUBB6	4|1	5	2.5	2	0|0|0|0|0|0|0|0|0|0|0|0|0|0|1|0|0|0|0|0|1|0|0|0|1|0|0|0|0|12|36|7|26|7|19|5|9|0|0	0	0	0	0	0	-50.74	0.2	0.87
ZNF331	Q9BUF5	TUBB6	8|7	15	7.5	2	0|0|0|0|0|0|0|0|0|0|0|0|0|0|1|0|0|0|0|0|1|0|0|0|1|0|0|0|0|12|36|7|26|7|19|5|9|0|0	0	0	0	0	0	-35.71	0.61	0.87
ZNF250	Q9BUF5	TUBB6	4|11	15	7.5	2	0|0|0|0|0|0|0|0|0|0|0|0|0|0|1|0|0|0|0|0|1|0|0|0|1|0|0|0|0|12|36|7|26|7|19|5|9|0|0	0	0	0	0	0	-42.16	0.61	0.86
ZNF595	Q9BUF5	TUBB6	1|3	4	2	2	0|0|0|0|0|0|0|0|0|0|0|0|0|0|1|0|0|0|0|0|1|0|0|0|1|0|0|0|0|12|36|7|26|7|19|5|9|0|0	0	0	0	0	0	-50.74	0.16	0.88
ZNF257	Q9BUF5	TUBB6	4|3	7	3.5	2	0|0|0|0|0|0|0|0|0|0|0|0|0|0|1|0|0|0|0|0|1|0|0|0|1|0|0|0|0|12|36|7|26|7|19|5|9|0|0	0	0	0	0	0	-44.69	0.28	0.87
ZSCAN5C	Q9BUF5	TUBB6	5|4	9	4.5	2	0|0|0|0|0|0|0|0|0|0|0|0|0|0|1|0|0|0|0|0|1|0|0|0|1|0|0|0|0|12|36|7|26|7|19|5|9|0|0	0	0	0	0	0	-42.16	0.37	0.87
ZNF596	Q9BUF5	TUBB6	5|4	9	4.5	2	0|0|0|0|0|0|0|0|0|0|0|0|0|0|1|0|0|0|0|0|1|0|0|0|1|0|0|0|0|12|36|7|26|7|19|5|9|0|0	0	0	0	0	0	-42.16	0.37	0.87
ZNF594	Q9BUF5	TUBB6	2|0	2	1	2	0|0|0|0|0|0|0|0|0|0|0|0|0|0|1|0|0|0|0|0|1|0|0|0|1|0|0|0|0|12|36|7|26|7|19|5|9|0|0	0	0	0	0	0	-54.65	0.08	0.88
ZNF490	Q9BUF5	TUBB6	5|3	8	4	2	0|0|0|0|0|0|0|0|0|0|0|0|0|0|1|0|0|0|0|0|1|0|0|0|1|0|0|0|0|12|36|7|26|7|19|5|9|0|0	0	0	0	0	0	-44.69	0.33	0.87
ZNF16	Q9BUF5	TUBB6	2|1	3	1.5	2	0|0|0|0|0|0|0|0|0|0|0|0|0|0|1|0|0|0|0|0|1|0|0|0|1|0|0|0|0|12|36|7|26|7|19|5|9|0|0	0	0	0	0	0	-50.74	0.12	0.88
ZNF71	Q9BUF5	TUBB6	16|22	38	19	2	0|0|0|0|0|0|0|0|0|0|0|0|0|0|1|0|0|0|0|0|1|0|0|0|1|0|0|0|0|12|36|7|26|7|19|5|9|0|0	0	0	0	0	0	-21.89	1.54	0.82
ZNF816	Q9BUF5	TUBB6	0|4	4	2	2	0|0|0|0|0|0|0|0|0|0|0|0|0|0|1|0|0|0|0|0|1|0|0|0|1|0|0|0|0|12|36|7|26|7|19|5|9|0|0	0	0	0	0	0	-54.65	0.16	0.87
IKZF3	Q9BUF5	TUBB6	2|11	13	6.5	2	0|0|0|0|0|0|0|0|0|0|0|0|0|0|1|0|0|0|0|0|1|0|0|0|1|0|0|0|0|12|36|7|26|7|19|5|9|0|0	0	0	0	0	0	-47.52	0.53	0.86
ZBTB6	Q9BUF5	TUBB6	2|0	2	1	2	0|0|0|0|0|0|0|0|0|0|0|0|0|0|1|0|0|0|0|0|1|0|0|0|1|0|0|0|0|12|36|7|26|7|19|5|9|0|0	0	0	0	0	0	-54.65	0.08	0.88
ZNF140	Q9BUF5	TUBB6	4|2	6	3	2	0|0|0|0|0|0|0|0|0|0|0|0|0|0|1|0|0|0|0|0|1|0|0|0|1|0|0|0|0|12|36|7|26|7|19|5|9|0|0	0	0	0	0	0	-47.52	0.24	0.87
ZNF708	Q9BUF5	TUBB6	18|16	34	17	2	0|0|0|0|0|0|0|0|0|0|0|0|0|0|1|0|0|0|0|0|1|0|0|0|1|0|0|0|0|12|36|7|26|7|19|5|9|0|0	0	0	0	0	0	-21.89	1.38	0.84
FEZF1	Q9BUF5	TUBB6	16|16	32	16	2	0|0|0|0|0|0|0|0|0|0|0|0|0|0|1|0|0|0|0|0|1|0|0|0|1|0|0|0|0|12|36|7|26|7|19|5|9|0|0	0	0	0	0	0	-21.89	1.3	0.85
MZF1	Q9BUF5	TUBB6	6|4	10	5	2	0|0|0|0|0|0|0|0|0|0|0|0|0|0|1|0|0|0|0|0|1|0|0|0|1|0|0|0|0|12|36|7|26|7|19|5|9|0|0	0	0	0	0	0	-42.16	0.41	0.87
ZBTB42	Q9BUF5	TUBB6	6|4	10	5	2	0|0|0|0|0|0|0|0|0|0|0|0|0|0|1|0|0|0|0|0|1|0|0|0|1|0|0|0|0|12|36|7|26|7|19|5|9|0|0	0	0	0	0	0	-42.16	0.41	0.87
ZNF8	Q9BUF5	TUBB6	12|14	26	13	2	0|0|0|0|0|0|0|0|0|0|0|0|0|0|1|0|0|0|0|0|1|0|0|0|1|0|0|0|0|12|36|7|26|7|19|5|9|0|0	0	0	0	0	0	-27.44	1.06	0.85
ZFP3	Q9BUF5	TUBB6	0|2	2	1	2	0|0|0|0|0|0|0|0|0|0|0|0|0|0|1|0|0|0|0|0|1|0|0|0|1|0|0|0|0|12|36|7|26|7|19|5|9|0|0	0	0	0	0	0	-54.65	0.08	0.88
KLF7	Q9BUF5	TUBB6	7|9	16	8	2	0|0|0|0|0|0|0|0|0|0|0|0|0|0|1|0|0|0|0|0|1|0|0|0|1|0|0|0|0|12|36|7|26|7|19|5|9|0|0	0	0	0	0	0	-35.71	0.65	0.86
ZNF669	Q9BUF5	TUBB6	11|17	28	14	2	0|0|0|0|0|0|0|0|0|0|0|0|0|0|1|0|0|0|0|0|1|0|0|0|1|0|0|0|0|12|36|7|26|7|19|5|9|0|0	0	0	0	0	0	-28.91	1.14	0.84
ZNF436	Q9BUF5	TUBB6	6|10	16	8	2	0|0|0|0|0|0|0|0|0|0|0|0|0|0|1|0|0|0|0|0|1|0|0|0|1|0|0|0|0|12|36|7|26|7|19|5|9|0|0	0	0	0	0	0	-37.7	0.65	0.86
ZNF768	Q9BUF5	TUBB6	19|22	41	20.5	2	0|0|0|0|0|0|0|0|0|0|0|0|0|0|1|0|0|0|0|0|1|0|0|0|1|0|0|0|0|12|36|7|26|7|19|5|9|0|0	0	0	0	0	0	-18.34	1.67	0.82
KLF1	Q9BUF5	TUBB6	3|2	5	2.5	2	0|0|0|0|0|0|0|0|0|0|0|0|0|0|1|0|0|0|0|0|1|0|0|0|1|0|0|0|0|12|36|7|26|7|19|5|9|0|0	0	0	0	0	0	-47.52	0.2	0.88
ZNF418	Q9BUF5	TUBB6	4|1	5	2.5	2	0|0|0|0|0|0|0|0|0|0|0|0|0|0|1|0|0|0|0|0|1|0|0|0|1|0|0|0|0|12|36|7|26|7|19|5|9|0|0	0	0	0	0	0	-50.74	0.2	0.87
ZNF513	Q9BUF5	TUBB6	1|2	3	1.5	2	0|0|0|0|0|0|0|0|0|0|0|0|0|0|1|0|0|0|0|0|1|0|0|0|1|0|0|0|0|12|36|7|26|7|19|5|9|0|0	0	0	0	0	0	-50.74	0.12	0.88
ZNF667	Q9BUF5	TUBB6	6|4	10	5	2	0|0|0|0|0|0|0|0|0|0|0|0|0|0|1|0|0|0|0|0|1|0|0|0|1|0|0|0|0|12|36|7|26|7|19|5|9|0|0	0	0	0	0	0	-42.16	0.41	0.87
ZNF324	Q9BUF5	TUBB6	1|1	2	1	2	0|0|0|0|0|0|0|0|0|0|0|0|0|0|1|0|0|0|0|0|1|0|0|0|1|0|0|0|0|12|36|7|26|7|19|5|9|0|0	0	0	0	0	0	-50.74	0.08	0.88
ZFP28	Q9BUF5	TUBB6	3|5	8	4	2	0|0|0|0|0|0|0|0|0|0|0|0|0|0|1|0|0|0|0|0|1|0|0|0|1|0|0|0|0|12|36|7|26|7|19|5|9|0|0	0	0	0	0	0	-44.69	0.33	0.87
GLIS1	Q9BUF5	TUBB6	2|0	2	1	2	0|0|0|0|0|0|0|0|0|0|0|0|0|0|1|0|0|0|0|0|1|0|0|0|1|0|0|0|0|12|36|7|26|7|19|5|9|0|0	0	0	0	0	0	-54.65	0.08	0.88
ZNF320	Q9BUF5	TUBB6	15|19	34	17	2	0|0|0|0|0|0|0|0|0|0|0|0|0|0|1|0|0|0|0|0|1|0|0|0|1|0|0|0|0|12|36|7|26|7|19|5|9|0|0	0	0	0	0	0	-23.18	1.38	0.84
ZNF189	Q9BUF5	TUBB6	4|2	6	3	2	0|0|0|0|0|0|0|0|0|0|0|0|0|0|1|0|0|0|0|0|1|0|0|0|1|0|0|0|0|12|36|7|26|7|19|5|9|0|0	0	0	0	0	0	-47.52	0.24	0.87
ZNF34	Q9BUF5	TUBB6	3|4	7	3.5	2	0|0|0|0|0|0|0|0|0|0|0|0|0|0|1|0|0|0|0|0|1|0|0|0|1|0|0|0|0|12|36|7|26|7|19|5|9|0|0	0	0	0	0	0	-44.69	0.28	0.87
ZNF329	Q9BUF5	TUBB6	4|0	4	2	2	0|0|0|0|0|0|0|0|0|0|0|0|0|0|1|0|0|0|0|0|1|0|0|0|1|0|0|0|0|12|36|7|26|7|19|5|9|0|0	0	0	0	0	0	-54.65	0.16	0.87
OSR2	Q9BUF5	TUBB6	3|8	11	5.5	2	0|0|0|0|0|0|0|0|0|0|0|0|0|0|1|0|0|0|0|0|1|0|0|0|1|0|0|0|0|12|36|7|26|7|19|5|9|0|0	0	0	0	0	0	-44.69	0.45	0.87
SCRT1	Q9BUF5	TUBB6	5|2	7	3.5	2	0|0|0|0|0|0|0|0|0|0|0|0|0|0|1|0|0|0|0|0|1|0|0|0|1|0|0|0|0|12|36|7|26|7|19|5|9|0|0	0	0	0	0	0	-47.52	0.28	0.87
ZNF582	Q9BUF5	TUBB6	7|4	11	5.5	2	0|0|0|0|0|0|0|0|0|0|0|0|0|0|1|0|0|0|0|0|1|0|0|0|1|0|0|0|0|12|36|7|26|7|19|5|9|0|0	0	0	0	0	0	-42.16	0.45	0.87
MYNN	Q9BUF5	TUBB6	6|6	12	6	2	0|0|0|0|0|0|0|0|0|0|0|0|0|0|1|0|0|0|0|0|1|0|0|0|1|0|0|0|0|12|36|7|26|7|19|5|9|0|0	0	0	0	0	0	-37.7	0.49	0.87
ZFP82	Q9BUF5	TUBB6	12|16	28	14	2	0|0|0|0|0|0|0|0|0|0|0|0|0|0|1|0|0|0|0|0|1|0|0|0|1|0|0|0|0|12|36|7|26|7|19|5|9|0|0	0	0	0	0	0	-27.44	1.14	0.85
PATZ1	Q9BUF5	TUBB6	0|1	1	0.5	2	0|0|0|0|0|0|0|0|0|0|0|0|0|0|1|0|0|0|0|0|1|0|0|0|1|0|0|0|0|12|36|7|26|7|19|5|9|0|0	0	0	0	0	0	-54.65	0.04	0.88
ZNF610	Q9BUF5	TUBB6	3|6	9	4.5	2	0|0|0|0|0|0|0|0|0|0|0|0|0|0|1|0|0|0|0|0|1|0|0|0|1|0|0|0|0|12|36|7|26|7|19|5|9|0|0	0	0	0	0	0	-44.69	0.37	0.87
ZNF37A	Q9BUF5	TUBB6	1|0	1	0.5	2	0|0|0|0|0|0|0|0|0|0|0|0|0|0|1|0|0|0|0|0|1|0|0|0|1|0|0|0|0|12|36|7|26|7|19|5|9|0|0	0	0	0	0	0	-54.65	0.04	0.88
ZNF692	Q9BUF5	TUBB6	1|0	1	0.5	2	0|0|0|0|0|0|0|0|0|0|0|0|0|0|1|0|0|0|0|0|1|0|0|0|1|0|0|0|0|12|36|7|26|7|19|5|9|0|0	0	0	0	0	0	-54.65	0.04	0.88
MAZ	Q9BUF5	TUBB6	5|3	8	4	2	0|0|0|0|0|0|0|0|0|0|0|0|0|0|1|0|0|0|0|0|1|0|0|0|1|0|0|0|0|12|36|7|26|7|19|5|9|0|0	0	0	0	0	0	-44.69	0.33	0.87
ZNF419	Q9BUF5	TUBB6	1|2	3	1.5	2	0|0|0|0|0|0|0|0|0|0|0|0|0|0|1|0|0|0|0|0|1|0|0|0|1|0|0|0|0|12|36|7|26|7|19|5|9|0|0	0	0	0	0	0	-50.74	0.12	0.88
ZNF449	Q9BUF5	TUBB6	4|7	11	5.5	2	0|0|0|0|0|0|0|0|0|0|0|0|0|0|1|0|0|0|0|0|1|0|0|0|1|0|0|0|0|12|36|7|26|7|19|5|9|0|0	0	0	0	0	0	-42.16	0.45	0.87
ZNF280A	Q9BUF5	TUBB6	11|8	19	9.5	2	0|0|0|0|0|0|0|0|0|0|0|0|0|0|1|0|0|0|0|0|1|0|0|0|1|0|0|0|0|12|36|7|26|7|19|5|9|0|0	0	0	0	0	0	-33.85	0.77	0.86
GTF3A	Q9BUF5	TUBB6	2|4	6	3	2	0|0|0|0|0|0|0|0|0|0|0|0|0|0|1|0|0|0|0|0|1|0|0|0|1|0|0|0|0|12|36|7|26|7|19|5|9|0|0	0	0	0	0	0	-47.52	0.24	0.87
ZNF547	Q9BUF5	TUBB6	7|8	15	7.5	2	0|0|0|0|0|0|0|0|0|0|0|0|0|0|1|0|0|0|0|0|1|0|0|0|1|0|0|0|0|12|36|7|26|7|19|5|9|0|0	0	0	0	0	0	-35.71	0.61	0.87
ZNF778	Q9BUF5	TUBB6	5|2	7	3.5	2	0|0|0|0|0|0|0|0|0|0|0|0|0|0|1|0|0|0|0|0|1|0|0|0|1|0|0|0|0|12|36|7|26|7|19|5|9|0|0	0	0	0	0	0	-47.52	0.28	0.87
ZNF18	Q9BUF5	TUBB6	5|2	7	3.5	2	0|0|0|0|0|0|0|0|0|0|0|0|0|0|1|0|0|0|0|0|1|0|0|0|1|0|0|0|0|12|36|7|26|7|19|5|9|0|0	0	0	0	0	0	-47.52	0.28	0.87
ZNF502	Q9BUF5	TUBB6	3|3	6	3	2	0|0|0|0|0|0|0|0|0|0|0|0|0|0|1|0|0|0|0|0|1|0|0|0|1|0|0|0|0|12|36|7|26|7|19|5|9|0|0	0	0	0	0	0	-44.69	0.24	0.88
ZNF549	Q9BUF5	TUBB6	1|1	2	1	2	0|0|0|0|0|0|0|0|0|0|0|0|0|0|1|0|0|0|0|0|1|0|0|0|1|0|0|0|0|12|36|7|26|7|19|5|9|0|0	0	0	0	0	0	-50.74	0.08	0.88
ZNF770	Q9BUF5	TUBB6	5|6	11	5.5	2	0|0|0|0|0|0|0|0|0|0|0|0|0|0|1|0|0|0|0|0|1|0|0|0|1|0|0|0|0|12|36|7|26|7|19|5|9|0|0	0	0	0	0	0	-39.84	0.45	0.87
ZSCAN30	Q9BUF5	TUBB6	0|3	3	1.5	2	0|0|0|0|0|0|0|0|0|0|0|0|0|0|1|0|0|0|0|0|1|0|0|0|1|0|0|0|0|12|36|7|26|7|19|5|9|0|0	0	0	0	0	0	-54.65	0.12	0.88
ZNF394	Q96NK8	NEUROD6	1|0	1	0.5	2	0|0|0|0|0|0|0|0|0|0|0|0|0|0|0|0|0|0|0|0|0|0|0|0|0|0|0|0|0|0|0|0|0|0|0|0|0|0|0	0	0	0	0	0	-3	5	0.88
ZNF140	P07305	H1F0	1|0	1	0.5	2	0|0|0|0|0|0|0|0|0|0|0|0|0|0|0|0|0|0|0|0|0|0|0|0|0|0|0|0|0|0|0|0|0|0|0|0|0|0|0	0	0	0	0	0	-3	5	0.88
ZNF322	P07305	H1F0	2|0	2	1	2	0|0|0|0|0|0|0|0|0|0|0|0|0|0|0|0|0|0|0|0|0|0|0|0|0|0|0|0|0|0|0|0|0|0|0|0|0|0|0	0.41	0.82	0.41	0.82	0.41	-3	10	0.28
ZFP28	P07305	H1F0	1|0	1	0.5	2	0|0|0|0|0|0|0|0|0|0|0|0|0|0|0|0|0|0|0|0|0|0|0|0|0|0|0|0|0|0|0|0|0|0|0|0|0|0|0	0	0	0	0	0	-3	5	0.88
ZNF594	P07305	H1F0	0|2	2	1	2	0|0|0|0|0|0|0|0|0|0|0|0|0|0|0|0|0|0|0|0|0|0|0|0|0|0|0|0|0|0|0|0|0|0|0|0|0|0|0	0.41	0.82	0.41	0.82	0.41	-3	10	0.28
ZBTB14	P07305	H1F0	4|1	5	2.5	2	0|0|0|0|0|0|0|0|0|0|0|0|0|0|0|0|0|0|0|0|0|0|0|0|0|0|0|0|0|0|0|0|0|0|0|0|0|0|0	0.5	0.99	0.5	0.99	0.5	-0.49	25	0.17
MAZ	P07305	H1F0	3|0	3	1.5	2	0|0|0|0|0|0|0|0|0|0|0|0|0|0|0|0|0|0|0|0|0|0|0|0|0|0|0|0|0|0|0|0|0|0|0|0|0|0|0	0.48	0.97	0.48	0.97	0.48	-3	15	0.19
ZNF189	P07305	H1F0	2|3	5	2.5	2	0|0|0|0|0|0|0|0|0|0|0|0|0|0|0|0|0|0|0|0|0|0|0|0|0|0|0|0|0|0|0|0|0|0|0|0|0|0|0	0.9	0.97	0.9	0.97	0.9	1.54	25	0.03
ZNF595	P07305	H1F0	1|0	1	0.5	2	0|0|0|0|0|0|0|0|0|0|0|0|0|0|0|0|0|0|0|0|0|0|0|0|0|0|0|0|0|0|0|0|0|0|0|0|0|0|0	0	0	0	0	0	-3	5	0.88
ZBTB42	P07305	H1F0	0|1	1	0.5	2	0|0|0|0|0|0|0|0|0|0|0|0|0|0|0|0|0|0|0|0|0|0|0|0|0|0|0|0|0|0|0|0|0|0|0|0|0|0|0	0	0	0	0	0	-3	5	0.88
ZNF436	P07305	H1F0	0|2	2	1	2	0|0|0|0|0|0|0|0|0|0|0|0|0|0|0|0|0|0|0|0|0|0|0|0|0|0|0|0|0|0|0|0|0|0|0|0|0|0|0	0.41	0.82	0.41	0.82	0.41	-3	10	0.28
ZNF596	P07305	H1F0	1|0	1	0.5	2	0|0|0|0|0|0|0|0|0|0|0|0|0|0|0|0|0|0|0|0|0|0|0|0|0|0|0|0|0|0|0|0|0|0|0|0|0|0|0	0	0	0	0	0	-3	5	0.88
PRDM1	P07305	H1F0	3|1	4	2	2	0|0|0|0|0|0|0|0|0|0|0|0|0|0|0|0|0|0|0|0|0|0|0|0|0|0|0|0|0|0|0|0|0|0|0|0|0|0|0	0.48	0.97	0.48	0.97	0.48	-0.49	20	0.19
ZNF419	P07305	H1F0	2|1	3	1.5	2	0|0|0|0|0|0|0|0|0|0|0|0|0|0|0|0|0|0|0|0|0|0|0|0|0|0|0|0|0|0|0|0|0|0|0|0|0|0|0	0.41	0.82	0.41	0.82	0.41	-0.49	15	0.28
ZFP82	P07305	H1F0	0|2	2	1	2	0|0|0|0|0|0|0|0|0|0|0|0|0|0|0|0|0|0|0|0|0|0|0|0|0|0|0|0|0|0|0|0|0|0|0|0|0|0|0	0.41	0.82	0.41	0.82	0.41	-3	10	0.28
ZNF214	P07305	H1F0	0|1	1	0.5	2	0|0|0|0|0|0|0|0|0|0|0|0|0|0|0|0|0|0|0|0|0|0|0|0|0|0|0|0|0|0|0|0|0|0|0|0|0|0|0	0	0	0	0	0	-3	5	0.88
ZNF667	P07305	H1F0	1|1	2	1	2	0|0|0|0|0|0|0|0|0|0|0|0|0|0|0|0|0|0|0|0|0|0|0|0|0|0|0|0|0|0|0|0|0|0|0|0|0|0|0	0	0	0	0	0	-0.49	10	0.88
ZNF16	P07305	H1F0	1|0	1	0.5	2	0|0|0|0|0|0|0|0|0|0|0|0|0|0|0|0|0|0|0|0|0|0|0|0|0|0|0|0|0|0|0|0|0|0|0|0|0|0|0	0	0	0	0	0	-3	5	0.88
ZNF71	P07305	H1F0	3|2	5	2.5	2	0|0|0|0|0|0|0|0|0|0|0|0|0|0|0|0|0|0|0|0|0|0|0|0|0|0|0|0|0|0|0|0|0|0|0|0|0|0|0	0.9	0.97	0.9	0.97	0.9	1.54	25	0.03
ZNF778	P07305	H1F0	1|1	2	1	2	0|0|0|0|0|0|0|0|0|0|0|0|0|0|0|0|0|0|0|0|0|0|0|0|0|0|0|0|0|0|0|0|0|0|0|0|0|0|0	0	0	0	0	0	-0.49	10	0.88
ZNF770	P07305	H1F0	2|1	3	1.5	2	0|0|0|0|0|0|0|0|0|0|0|0|0|0|0|0|0|0|0|0|0|0|0|0|0|0|0|0|0|0|0|0|0|0|0|0|0|0|0	0.41	0.82	0.41	0.82	0.41	-0.49	15	0.28
ZNF768	P07305	H1F0	1|0	1	0.5	2	0|0|0|0|0|0|0|0|0|0|0|0|0|0|0|0|0|0|0|0|0|0|0|0|0|0|0|0|0|0|0|0|0|0|0|0|0|0|0	0	0	0	0	0	-3	5	0.88
ZFP82	Q9NXR7	BRE	0|1	1	0.5	2	0|0|0|0|0|0|0|0|0|0|0|0|0|0|0|0|0|0|0|0|0|0|0|0|0|0|0|0|0|0|0|0|0|0|0|0|0|0|0	0	0	0	0	0	-3	5	0.88
ZNF71	Q9NXR7	BRE	2|0	2	1	2	0|0|0|0|0|0|0|0|0|0|0|0|0|0|0|0|0|0|0|0|0|0|0|0|0|0|0|0|0|0|0|0|0|0|0|0|0|0|0	0.41	0.82	0.41	0.82	0.41	-3	10	0.28
ZNF768	Q9NXR7	BRE	0|1	1	0.5	2	0|0|0|0|0|0|0|0|0|0|0|0|0|0|0|0|0|0|0|0|0|0|0|0|0|0|0|0|0|0|0|0|0|0|0|0|0|0|0	0	0	0	0	0	-3	5	0.88
ZNF331	Q9NXR7	BRE	0|2	2	1	2	0|0|0|0|0|0|0|0|0|0|0|0|0|0|0|0|0|0|0|0|0|0|0|0|0|0|0|0|0|0|0|0|0|0|0|0|0|0|0	0.41	0.82	0.41	0.82	0.41	-3	10	0.28
ZNF331	Q06587	RING1	0|2	2	1	2	0|0|0|0|0|0|0|0|0|0|0|0|0|0|0|0|0|0|0|0|0|0|0|0|0|0|0|0|0|1|1|0|1|0|0|0|0|0|0	0.18	0.36	0.18	0.36	0.18	-3.72	3.33	0.44
ZNF250	Q06587	RING1	1|2	3	1.5	2	0|0|0|0|0|0|0|0|0|0|0|0|0|0|0|0|0|0|0|0|0|0|0|0|0|0|0|0|0|1|1|0|1|0|0|0|0|0|0	0.18	0.36	0.18	0.36	0.18	-2.11	5	0.44
GLIS1	Q06587	RING1	1|1	2	1	2	0|0|0|0|0|0|0|0|0|0|0|0|0|0|0|0|0|0|0|0|0|0|0|0|0|0|0|0|0|1|1|0|1|0|0|0|0|0|0	0	0	0	0	0	-2.11	3.33	0.88
SCRT1	Q06587	RING1	0|1	1	0.5	2	0|0|0|0|0|0|0|0|0|0|0|0|0|0|0|0|0|0|0|0|0|0|0|0|0|0|0|0|0|1|1|0|1|0|0|0|0|0|0	0	0	0	0	0	-3.72	1.67	0.88
ZNF594	Q06587	RING1	0|1	1	0.5	2	0|0|0|0|0|0|0|0|0|0|0|0|0|0|0|0|0|0|0|0|0|0|0|0|0|0|0|0|0|1|1|0|1|0|0|0|0|0|0	0	0	0	0	0	-3.72	1.67	0.88
ZNF16	Q06587	RING1	1|0	1	0.5	2	0|0|0|0|0|0|0|0|0|0|0|0|0|0|0|0|0|0|0|0|0|0|0|0|0|0|0|0|0|1|1|0|1|0|0|0|0|0|0	0	0	0	0	0	-3.72	1.67	0.88
ZNF71	Q06587	RING1	0|2	2	1	2	0|0|0|0|0|0|0|0|0|0|0|0|0|0|0|0|0|0|0|0|0|0|0|0|0|0|0|0|0|1|1|0|1|0|0|0|0|0|0	0.18	0.36	0.18	0.36	0.18	-3.72	3.33	0.44
ZNF816	Q06587	RING1	1|1	2	1	2	0|0|0|0|0|0|0|0|0|0|0|0|0|0|0|0|0|0|0|0|0|0|0|0|0|0|0|0|0|1|1|0|1|0|0|0|0|0|0	0	0	0	0	0	-2.11	3.33	0.88
ZNF708	Q06587	RING1	1|0	1	0.5	2	0|0|0|0|0|0|0|0|0|0|0|0|0|0|0|0|0|0|0|0|0|0|0|0|0|0|0|0|0|1|1|0|1|0|0|0|0|0|0	0	0	0	0	0	-3.72	1.67	0.88
ZNF547	Q06587	RING1	2|1	3	1.5	2	0|0|0|0|0|0|0|0|0|0|0|0|0|0|0|0|0|0|0|0|0|0|0|0|0|0|0|0|0|1|1|0|1|0|0|0|0|0|0	0.18	0.36	0.18	0.36	0.18	-2.11	5	0.44
KLF7	Q06587	RING1	1|2	3	1.5	2	0|0|0|0|0|0|0|0|0|0|0|0|0|0|0|0|0|0|0|0|0|0|0|0|0|0|0|0|0|1|1|0|1|0|0|0|0|0|0	0.18	0.36	0.18	0.36	0.18	-2.11	5	0.44
ZNF436	Q06587	RING1	0|2	2	1	2	0|0|0|0|0|0|0|0|0|0|0|0|0|0|0|0|0|0|0|0|0|0|0|0|0|0|0|0|0|1|1|0|1|0|0|0|0|0|0	0.18	0.36	0.18	0.36	0.18	-3.72	3.33	0.44
KLF1	Q06587	RING1	2|0	2	1	2	0|0|0|0|0|0|0|0|0|0|0|0|0|0|0|0|0|0|0|0|0|0|0|0|0|0|0|0|0|1|1|0|1|0|0|0|0|0|0	0.18	0.36	0.18	0.36	0.18	-3.72	3.33	0.44
ZNF667	Q06587	RING1	0|1	1	0.5	2	0|0|0|0|0|0|0|0|0|0|0|0|0|0|0|0|0|0|0|0|0|0|0|0|0|0|0|0|0|1|1|0|1|0|0|0|0|0|0	0	0	0	0	0	-3.72	1.67	0.88
ZFP28	Q06587	RING1	1|0	1	0.5	2	0|0|0|0|0|0|0|0|0|0|0|0|0|0|0|0|0|0|0|0|0|0|0|0|0|0|0|0|0|1|1|0|1|0|0|0|0|0|0	0	0	0	0	0	-3.72	1.67	0.88
ZNF189	Q06587	RING1	1|0	1	0.5	2	0|0|0|0|0|0|0|0|0|0|0|0|0|0|0|0|0|0|0|0|0|0|0|0|0|0|0|0|0|1|1|0|1|0|0|0|0|0|0	0	0	0	0	0	-3.72	1.67	0.88
OSR2	Q06587	RING1	2|0	2	1	2	0|0|0|0|0|0|0|0|0|0|0|0|0|0|0|0|0|0|0|0|0|0|0|0|0|0|0|0|0|1|1|0|1|0|0|0|0|0|0	0.18	0.36	0.18	0.36	0.18	-3.72	3.33	0.44
ZFP82	Q06587	RING1	1|0	1	0.5	2	0|0|0|0|0|0|0|0|0|0|0|0|0|0|0|0|0|0|0|0|0|0|0|0|0|0|0|0|0|1|1|0|1|0|0|0|0|0|0	0	0	0	0	0	-3.72	1.67	0.88
PATZ1	Q06587	RING1	0|1	1	0.5	2	0|0|0|0|0|0|0|0|0|0|0|0|0|0|0|0|0|0|0|0|0|0|0|0|0|0|0|0|0|1|1|0|1|0|0|0|0|0|0	0	0	0	0	0	-3.72	1.67	0.88
MAZ	Q06587	RING1	2|2	4	2	2	0|0|0|0|0|0|0|0|0|0|0|0|0|0|0|0|0|0|0|0|0|0|0|0|0|0|0|0|0|1|1|0|1|0|0|0|0|0|0	0.36	0.36	0.36	0.36	0.36	-0.56	6.67	0.35
ZBTB42	Q06587	RING1	0|1	1	0.5	2	0|0|0|0|0|0|0|0|0|0|0|0|0|0|0|0|0|0|0|0|0|0|0|0|0|0|0|0|0|1|1|0|1|0|0|0|0|0|0	0	0	0	0	0	-3.72	1.67	0.88
PRDM1	Q06587	RING1	2|2	4	2	2	0|0|0|0|0|0|0|0|0|0|0|0|0|0|0|0|0|0|0|0|0|0|0|0|0|0|0|0|0|1|1|0|1|0|0|0|0|0|0	0.36	0.36	0.36	0.36	0.36	-0.56	6.67	0.35
ZNF778	Q06587	RING1	1|1	2	1	2	0|0|0|0|0|0|0|0|0|0|0|0|0|0|0|0|0|0|0|0|0|0|0|0|0|0|0|0|0|1|1|0|1|0|0|0|0|0|0	0	0	0	0	0	-2.11	3.33	0.88
ZNF770	Q06587	RING1	0|1	1	0.5	2	0|0|0|0|0|0|0|0|0|0|0|0|0|0|0|0|0|0|0|0|0|0|0|0|0|0|0|0|0|1|1|0|1|0|0|0|0|0|0	0	0	0	0	0	-3.72	1.67	0.88
ZSCAN30	Q06587	RING1	0|2	2	1	2	0|0|0|0|0|0|0|0|0|0|0|0|0|0|0|0|0|0|0|0|0|0|0|0|0|0|0|0|0|1|1|0|1|0|0|0|0|0|0	0.18	0.36	0.18	0.36	0.18	-3.72	3.33	0.44
ZNF610	P0C0S8	HIST1H2AG;HIST1H2AI;HIST1H2AK;HIST1H2AL;HIST1H2AM	2|7	9	4.5	2	0|0|0|0|0|0|0|0|0|0|0|0|0|0|0|0|0|0|0|0|0|0|0|0|4|0|0|0|0|57|12|18|41|18|7|4|4|1|1	0	0	0	0	0	-65.81	0.27	0.88
ZFP28	P0C0S8	HIST1H2AG;HIST1H2AI;HIST1H2AK;HIST1H2AL;HIST1H2AM	4|0	4	2	2	0|0|0|0|0|0|0|0|0|0|0|0|0|0|0|0|0|0|0|0|0|0|0|0|4|0|0|0|0|57|12|18|41|18|7|4|4|1|1	0	0	0	0	0	-73.54	0.12	0.88
ZNF140	P0C0S8	HIST1H2AG;HIST1H2AI;HIST1H2AK;HIST1H2AL;HIST1H2AM	0|4	4	2	2	0|0|0|0|0|0|0|0|0|0|0|0|0|0|0|0|0|0|0|0|0|0|0|0|4|0|0|0|0|57|12|18|41|18|7|4|4|1|1	0	0	0	0	0	-73.54	0.12	0.88
ZNF418	P0C0S8	HIST1H2AG;HIST1H2AI;HIST1H2AK;HIST1H2AL;HIST1H2AM	0|2	2	1	2	0|0|0|0|0|0|0|0|0|0|0|0|0|0|0|0|0|0|0|0|0|0|0|0|4|0|0|0|0|57|12|18|41|18|7|4|4|1|1	0	0	0	0	0	-73.54	0.06	0.88
ZNF189	P0C0S8	HIST1H2AG;HIST1H2AI;HIST1H2AK;HIST1H2AL;HIST1H2AM	2|2	4	2	2	0|0|0|0|0|0|0|0|0|0|0|0|0|0|0|0|0|0|0|0|0|0|0|0|4|0|0|0|0|57|12|18|41|18|7|4|4|1|1	0	0	0	0	0	-65.81	0.12	0.88
ZBTB42	P0C0S8	HIST1H2AG;HIST1H2AI;HIST1H2AK;HIST1H2AL;HIST1H2AM	6|7	13	6.5	2	0|0|0|0|0|0|0|0|0|0|0|0|0|0|0|0|0|0|0|0|0|0|0|0|4|0|0|0|0|57|12|18|41|18|7|4|4|1|1	0	0	0	0	0	-54.8	0.39	0.88
ZNF778	P0C0S8	HIST1H2AG;HIST1H2AI;HIST1H2AK;HIST1H2AL;HIST1H2AM	3|3	6	3	2	0|0|0|0|0|0|0|0|0|0|0|0|0|0|0|0|0|0|0|0|0|0|0|0|4|0|0|0|0|57|12|18|41|18|7|4|4|1|1	0	0	0	0	0	-62.69	0.18	0.88
ZNF595	P0C0S8	HIST1H2AG;HIST1H2AI;HIST1H2AK;HIST1H2AL;HIST1H2AM	3|2	5	2.5	2	0|0|0|0|0|0|0|0|0|0|0|0|0|0|0|0|0|0|0|0|0|0|0|0|4|0|0|0|0|57|12|18|41|18|7|4|4|1|1	0	0	0	0	0	-65.81	0.15	0.88
ZNF513	P0C0S8	HIST1H2AG;HIST1H2AI;HIST1H2AK;HIST1H2AL;HIST1H2AM	6|0	6	3	2	0|0|0|0|0|0|0|0|0|0|0|0|0|0|0|0|0|0|0|0|0|0|0|0|4|0|0|0|0|57|12|18|41|18|7|4|4|1|1	0	0	0	0	0	-73.54	0.18	0.88
ZNF184	P0C0S8	HIST1H2AG;HIST1H2AI;HIST1H2AK;HIST1H2AL;HIST1H2AM	0|1	1	0.5	2	0|0|0|0|0|0|0|0|0|0|0|0|0|0|0|0|0|0|0|0|0|0|0|0|4|0|0|0|0|57|12|18|41|18|7|4|4|1|1	0	0	0	0	0	-73.54	0.03	0.88
ZNF549	P0C0S8	HIST1H2AG;HIST1H2AI;HIST1H2AK;HIST1H2AL;HIST1H2AM	2|0	2	1	2	0|0|0|0|0|0|0|0|0|0|0|0|0|0|0|0|0|0|0|0|0|0|0|0|4|0|0|0|0|57|12|18|41|18|7|4|4|1|1	0	0	0	0	0	-73.54	0.06	0.88
ZNF816	P0C0S8	HIST1H2AG;HIST1H2AI;HIST1H2AK;HIST1H2AL;HIST1H2AM	2|0	2	1	2	0|0|0|0|0|0|0|0|0|0|0|0|0|0|0|0|0|0|0|0|0|0|0|0|4|0|0|0|0|57|12|18|41|18|7|4|4|1|1	0	0	0	0	0	-73.54	0.06	0.88
ZNF770	P0C0S8	HIST1H2AG;HIST1H2AI;HIST1H2AK;HIST1H2AL;HIST1H2AM	3|3	6	3	2	0|0|0|0|0|0|0|0|0|0|0|0|0|0|0|0|0|0|0|0|0|0|0|0|4|0|0|0|0|57|12|18|41|18|7|4|4|1|1	0	0	0	0	0	-62.69	0.18	0.88
ZNF667	P0C0S8	HIST1H2AG;HIST1H2AI;HIST1H2AK;HIST1H2AL;HIST1H2AM	2|3	5	2.5	2	0|0|0|0|0|0|0|0|0|0|0|0|0|0|0|0|0|0|0|0|0|0|0|0|4|0|0|0|0|57|12|18|41|18|7|4|4|1|1	0	0	0	0	0	-65.81	0.15	0.88
ZNF214	P0C0S5	H2AFZ	1|1	2	1	2	6|14|0|0|1|2|0|0|0|2|2|1|6|0|3|5|0|2|3|2|7|2|5|0|4|5|8|8|2|40|10|12|30|12|3|3|2|1|1	0	0	0	0	0	-61.4	0.07	0.88
IKZF3	P0C0S5	H2AFZ	8|8	16	8	2	6|14|0|0|1|2|0|0|0|2|2|1|6|0|3|5|0|2|3|2|7|2|5|0|4|5|8|8|2|40|10|12|30|12|3|3|2|1|1	0	0	0	0	0	-43.28	0.54	0.87
ZNF490	P0C0S5	H2AFZ	3|2	5	2.5	2	6|14|0|0|1|2|0|0|0|2|2|1|6|0|3|5|0|2|3|2|7|2|5|0|4|5|8|8|2|40|10|12|30|12|3|3|2|1|1	0	0	0	0	0	-58	0.17	0.88
ZNF331	P0C0S5	H2AFZ	4|8	12	6	2	6|14|0|0|1|2|0|0|0|2|2|1|6|0|3|5|0|2|3|2|7|2|5|0|4|5|8|8|2|40|10|12|30|12|3|3|2|1|1	0	0	0	0	0	-52.29	0.41	0.87
ZNF250	P0C0S5	H2AFZ	6|12	18	9	2	6|14|0|0|1|2|0|0|0|2|2|1|6|0|3|5|0|2|3|2|7|2|5|0|4|5|8|8|2|40|10|12|30|12|3|3|2|1|1	0	0	0	0	0	-47.48	0.61	0.87
ZNF692	P0C0S5	H2AFZ	3|4	7	3.5	2	6|14|0|0|1|2|0|0|0|2|2|1|6|0|3|5|0|2|3|2|7|2|5|0|4|5|8|8|2|40|10|12|30|12|3|3|2|1|1	0	0	0	0	0	-55	0.24	0.88
ZNF595	P0C0S5	H2AFZ	1|1	2	1	2	6|14|0|0|1|2|0|0|0|2|2|1|6|0|3|5|0|2|3|2|7|2|5|0|4|5|8|8|2|40|10|12|30|12|3|3|2|1|1	0	0	0	0	0	-61.4	0.07	0.88
ZNF34	P0C0S5	H2AFZ	2|2	4	2	2	6|14|0|0|1|2|0|0|0|2|2|1|6|0|3|5|0|2|3|2|7|2|5|0|4|5|8|8|2|40|10|12|30|12|3|3|2|1|1	0	0	0	0	0	-58	0.14	0.88
ZFP28	P0C0S5	H2AFZ	1|2	3	1.5	2	6|14|0|0|1|2|0|0|0|2|2|1|6|0|3|5|0|2|3|2|7|2|5|0|4|5|8|8|2|40|10|12|30|12|3|3|2|1|1	0	0	0	0	0	-61.4	0.1	0.88
ZNF596	P0C0S5	H2AFZ	6|9	15	7.5	2	6|14|0|0|1|2|0|0|0|2|2|1|6|0|3|5|0|2|3|2|7|2|5|0|4|5|8|8|2|40|10|12|30|12|3|3|2|1|1	0	0	0	0	0	-47.48	0.51	0.87
ZNF667	P0C0S5	H2AFZ	1|2	3	1.5	2	6|14|0|0|1|2|0|0|0|2|2|1|6|0|3|5|0|2|3|2|7|2|5|0|4|5|8|8|2|40|10|12|30|12|3|3|2|1|1	0	0	0	0	0	-61.4	0.1	0.88
ZNF594	P0C0S5	H2AFZ	9|15	24	12	2	6|14|0|0|1|2|0|0|0|2|2|1|6|0|3|5|0|2|3|2|7|2|5|0|4|5|8|8|2|40|10|12|30|12|3|3|2|1|1	0	0	0	0	0	-41.36	0.82	0.86
ZNF419	P0C0S5	H2AFZ	4|5	9	4.5	2	6|14|0|0|1|2|0|0|0|2|2|1|6|0|3|5|0|2|3|2|7|2|5|0|4|5|8|8|2|40|10|12|30|12|3|3|2|1|1	0	0	0	0	0	-52.29	0.31	0.88
ZNF16	P0C0S5	H2AFZ	2|4	6	3	2	6|14|0|0|1|2|0|0|0|2|2|1|6|0|3|5|0|2|3|2|7|2|5|0|4|5|8|8|2|40|10|12|30|12|3|3|2|1|1	0	0	0	0	0	-58	0.2	0.88
ZNF71	P0C0S5	H2AFZ	7|8	15	7.5	2	6|14|0|0|1|2|0|0|0|2|2|1|6|0|3|5|0|2|3|2|7|2|5|0|4|5|8|8|2|40|10|12|30|12|3|3|2|1|1	0	0	0	0	0	-45.31	0.51	0.87
ZNF816	P0C0S5	H2AFZ	2|1	3	1.5	2	6|14|0|0|1|2|0|0|0|2|2|1|6|0|3|5|0|2|3|2|7|2|5|0|4|5|8|8|2|40|10|12|30|12|3|3|2|1|1	0	0	0	0	0	-61.4	0.1	0.88
ZSCAN5C	P0C0S5	H2AFZ	8|7	15	7.5	2	6|14|0|0|1|2|0|0|0|2|2|1|6|0|3|5|0|2|3|2|7|2|5|0|4|5|8|8|2|40|10|12|30|12|3|3|2|1|1	0	0	0	0	0	-45.31	0.51	0.87
ZNF320	P0C0S5	H2AFZ	3|4	7	3.5	2	6|14|0|0|1|2|0|0|0|2|2|1|6|0|3|5|0|2|3|2|7|2|5|0|4|5|8|8|2|40|10|12|30|12|3|3|2|1|1	0	0	0	0	0	-55	0.24	0.88
ZNF140	P0C0S5	H2AFZ	3|1	4	2	2	6|14|0|0|1|2|0|0|0|2|2|1|6|0|3|5|0|2|3|2|7|2|5|0|4|5|8|8|2|40|10|12|30|12|3|3|2|1|1	0	0	0	0	0	-61.4	0.14	0.88
ZNF708	P0C0S5	H2AFZ	6|5	11	5.5	2	6|14|0|0|1|2|0|0|0|2|2|1|6|0|3|5|0|2|3|2|7|2|5|0|4|5|8|8|2|40|10|12|30|12|3|3|2|1|1	0	0	0	0	0	-49.79	0.37	0.87
FEZF1	P0C0S5	H2AFZ	13|9	22	11	2	6|14|0|0|1|2|0|0|0|2|2|1|6|0|3|5|0|2|3|2|7|2|5|0|4|5|8|8|2|40|10|12|30|12|3|3|2|1|1	0	0	0	0	0	-41.36	0.75	0.87
MZF1	P0C0S5	H2AFZ	2|2	4	2	2	6|14|0|0|1|2|0|0|0|2|2|1|6|0|3|5|0|2|3|2|7|2|5|0|4|5|8|8|2|40|10|12|30|12|3|3|2|1|1	0	0	0	0	0	-58	0.14	0.88
ZBTB14	P0C0S5	H2AFZ	7|3	10	5	2	6|14|0|0|1|2|0|0|0|2|2|1|6|0|3|5|0|2|3|2|7|2|5|0|4|5|8|8|2|40|10|12|30|12|3|3|2|1|1	0	0	0	0	0	-55	0.34	0.87
ZNF18	P0C0S5	H2AFZ	4|5	9	4.5	2	6|14|0|0|1|2|0|0|0|2|2|1|6|0|3|5|0|2|3|2|7|2|5|0|4|5|8|8|2|40|10|12|30|12|3|3|2|1|1	0	0	0	0	0	-52.29	0.31	0.88
ZBTB42	P0C0S5	H2AFZ	2|1	3	1.5	2	6|14|0|0|1|2|0|0|0|2|2|1|6|0|3|5|0|2|3|2|7|2|5|0|4|5|8|8|2|40|10|12|30|12|3|3|2|1|1	0	0	0	0	0	-61.4	0.1	0.88
ZNF8	P0C0S5	H2AFZ	3|4	7	3.5	2	6|14|0|0|1|2|0|0|0|2|2|1|6|0|3|5|0|2|3|2|7|2|5|0|4|5|8|8|2|40|10|12|30|12|3|3|2|1|1	0	0	0	0	0	-55	0.24	0.88
ZFP3	P0C0S5	H2AFZ	5|3	8	4	2	6|14|0|0|1|2|0|0|0|2|2|1|6|0|3|5|0|2|3|2|7|2|5|0|4|5|8|8|2|40|10|12|30|12|3|3|2|1|1	0	0	0	0	0	-55	0.27	0.88
KLF7	P0C0S5	H2AFZ	4|3	7	3.5	2	6|14|0|0|1|2|0|0|0|2|2|1|6|0|3|5|0|2|3|2|7|2|5|0|4|5|8|8|2|40|10|12|30|12|3|3|2|1|1	0	0	0	0	0	-55	0.24	0.88
ZNF669	P0C0S5	H2AFZ	2|1	3	1.5	2	6|14|0|0|1|2|0|0|0|2|2|1|6|0|3|5|0|2|3|2|7|2|5|0|4|5|8|8|2|40|10|12|30|12|3|3|2|1|1	0	0	0	0	0	-61.4	0.1	0.88
ZNF436	P0C0S5	H2AFZ	8|12	20	10	2	6|14|0|0|1|2|0|0|0|2|2|1|6|0|3|5|0|2|3|2|7|2|5|0|4|5|8|8|2|40|10|12|30|12|3|3|2|1|1	0	0	0	0	0	-43.28	0.68	0.87
ZNF768	P0C0S5	H2AFZ	11|5	16	8	2	6|14|0|0|1|2|0|0|0|2|2|1|6|0|3|5|0|2|3|2|7|2|5|0|4|5|8|8|2|40|10|12|30|12|3|3|2|1|1	0	0	0	0	0	-49.79	0.54	0.87
KLF1	P0C0S5	H2AFZ	8|3	11	5.5	2	6|14|0|0|1|2|0|0|0|2|2|1|6|0|3|5|0|2|3|2|7|2|5|0|4|5|8|8|2|40|10|12|30|12|3|3|2|1|1	0	0	0	0	0	-55	0.37	0.87
ZNF418	P0C0S5	H2AFZ	3|1	4	2	2	6|14|0|0|1|2|0|0|0|2|2|1|6|0|3|5|0|2|3|2|7|2|5|0|4|5|8|8|2|40|10|12|30|12|3|3|2|1|1	0	0	0	0	0	-61.4	0.14	0.88
ZIM3	P0C0S5	H2AFZ	0|5	5	2.5	2	6|14|0|0|1|2|0|0|0|2|2|1|6|0|3|5|0|2|3|2|7|2|5|0|4|5|8|8|2|40|10|12|30|12|3|3|2|1|1	0	0	0	0	0	-65.5	0.17	0.88
ZNF184	P0C0S5	H2AFZ	3|1	4	2	2	6|14|0|0|1|2|0|0|0|2|2|1|6|0|3|5|0|2|3|2|7|2|5|0|4|5|8|8|2|40|10|12|30|12|3|3|2|1|1	0	0	0	0	0	-61.4	0.14	0.88
GLIS1	P0C0S5	H2AFZ	2|2	4	2	2	6|14|0|0|1|2|0|0|0|2|2|1|6|0|3|5|0|2|3|2|7|2|5|0|4|5|8|8|2|40|10|12|30|12|3|3|2|1|1	0	0	0	0	0	-58	0.14	0.88
ZBTB6	P0C0S5	H2AFZ	5|5	10	5	2	6|14|0|0|1|2|0|0|0|2|2|1|6|0|3|5|0|2|3|2|7|2|5|0|4|5|8|8|2|40|10|12|30|12|3|3|2|1|1	0	0	0	0	0	-49.79	0.34	0.88
ZNF322	P0C0S5	H2AFZ	11|12	23	11.5	2	6|14|0|0|1|2|0|0|0|2|2|1|6|0|3|5|0|2|3|2|7|2|5|0|4|5|8|8|2|40|10|12|30|12|3|3|2|1|1	0	0	0	0	0	-37.82	0.78	0.87
ZNF189	P0C0S5	H2AFZ	2|2	4	2	2	6|14|0|0|1|2|0|0|0|2|2|1|6|0|3|5|0|2|3|2|7|2|5|0|4|5|8|8|2|40|10|12|30|12|3|3|2|1|1	0	0	0	0	0	-58	0.14	0.88
ZNF329	P0C0S5	H2AFZ	2|3	5	2.5	2	6|14|0|0|1|2|0|0|0|2|2|1|6|0|3|5|0|2|3|2|7|2|5|0|4|5|8|8|2|40|10|12|30|12|3|3|2|1|1	0	0	0	0	0	-58	0.17	0.88
OSR2	P0C0S5	H2AFZ	4|6	10	5	2	6|14|0|0|1|2|0|0|0|2|2|1|6|0|3|5|0|2|3|2|7|2|5|0|4|5|8|8|2|40|10|12|30|12|3|3|2|1|1	0	0	0	0	0	-52.29	0.34	0.87
ZNF582	P0C0S5	H2AFZ	5|7	12	6	2	6|14|0|0|1|2|0|0|0|2|2|1|6|0|3|5|0|2|3|2|7|2|5|0|4|5|8|8|2|40|10|12|30|12|3|3|2|1|1	0	0	0	0	0	-49.79	0.41	0.87
MYNN	P0C0S5	H2AFZ	9|7	16	8	2	6|14|0|0|1|2|0|0|0|2|2|1|6|0|3|5|0|2|3|2|7|2|5|0|4|5|8|8|2|40|10|12|30|12|3|3|2|1|1	0	0	0	0	0	-45.31	0.54	0.87
ZFP82	P0C0S5	H2AFZ	8|5	13	6.5	2	6|14|0|0|1|2|0|0|0|2|2|1|6|0|3|5|0|2|3|2|7|2|5|0|4|5|8|8|2|40|10|12|30|12|3|3|2|1|1	0	0	0	0	0	-49.79	0.44	0.87
PATZ1	P0C0S5	H2AFZ	8|12	20	10	2	6|14|0|0|1|2|0|0|0|2|2|1|6|0|3|5|0|2|3|2|7|2|5|0|4|5|8|8|2|40|10|12|30|12|3|3|2|1|1	0	0	0	0	0	-43.28	0.68	0.87
ZNF394	P0C0S5	H2AFZ	2|2	4	2	2	6|14|0|0|1|2|0|0|0|2|2|1|6|0|3|5|0|2|3|2|7|2|5|0|4|5|8|8|2|40|10|12|30|12|3|3|2|1|1	0	0	0	0	0	-58	0.14	0.88
ZNF37A	P0C0S5	H2AFZ	1|0	1	0.5	2	6|14|0|0|1|2|0|0|0|2|2|1|6|0|3|5|0|2|3|2|7|2|5|0|4|5|8|8|2|40|10|12|30|12|3|3|2|1|1	0	0	0	0	0	-65.5	0.03	0.88
ZNF549	P0C0S5	H2AFZ	1|4	5	2.5	2	6|14|0|0|1|2|0|0|0|2|2|1|6|0|3|5|0|2|3|2|7|2|5|0|4|5|8|8|2|40|10|12|30|12|3|3|2|1|1	0	0	0	0	0	-61.4	0.17	0.88
MAZ	P0C0S5	H2AFZ	26|15	41	20.5	2	6|14|0|0|1|2|0|0|0|2|2|1|6|0|3|5|0|2|3|2|7|2|5|0|4|5|8|8|2|40|10|12|30|12|3|3|2|1|1	0	0	0	0	0	-31.62	1.39	0.84
ZNF449	P0C0S5	H2AFZ	15|9	24	12	2	6|14|0|0|1|2|0|0|0|2|2|1|6|0|3|5|0|2|3|2|7|2|5|0|4|5|8|8|2|40|10|12|30|12|3|3|2|1|1	0	0	0	0	0	-41.36	0.82	0.86
ZNF280A	P0C0S5	H2AFZ	4|4	8	4	2	6|14|0|0|1|2|0|0|0|2|2|1|6|0|3|5|0|2|3|2|7|2|5|0|4|5|8|8|2|40|10|12|30|12|3|3|2|1|1	0	0	0	0	0	-52.29	0.27	0.88
GTF3A	P0C0S5	H2AFZ	7|7	14	7	2	6|14|0|0|1|2|0|0|0|2|2|1|6|0|3|5|0|2|3|2|7|2|5|0|4|5|8|8|2|40|10|12|30|12|3|3|2|1|1	0	0	0	0	0	-45.31	0.48	0.87
ZNF547	P0C0S5	H2AFZ	8|5	13	6.5	2	6|14|0|0|1|2|0|0|0|2|2|1|6|0|3|5|0|2|3|2|7|2|5|0|4|5|8|8|2|40|10|12|30|12|3|3|2|1|1	0	0	0	0	0	-49.79	0.44	0.87
PRDM1	P0C0S5	H2AFZ	14|23	37	18.5	2	6|14|0|0|1|2|0|0|0|2|2|1|6|0|3|5|0|2|3|2|7|2|5|0|4|5|8|8|2|40|10|12|30|12|3|3|2|1|1	0	0	0	0	0	-33.13	1.26	0.85
ZNF778	P0C0S5	H2AFZ	1|2	3	1.5	2	6|14|0|0|1|2|0|0|0|2|2|1|6|0|3|5|0|2|3|2|7|2|5|0|4|5|8|8|2|40|10|12|30|12|3|3|2|1|1	0	0	0	0	0	-61.4	0.1	0.88
SCRT1	P0C0S5	H2AFZ	14|14	28	14	2	6|14|0|0|1|2|0|0|0|2|2|1|6|0|3|5|0|2|3|2|7|2|5|0|4|5|8|8|2|40|10|12|30|12|3|3|2|1|1	0	0	0	0	0	-33.13	0.95	0.86
ZNF502	P0C0S5	H2AFZ	2|2	4	2	2	6|14|0|0|1|2|0|0|0|2|2|1|6|0|3|5|0|2|3|2|7|2|5|0|4|5|8|8|2|40|10|12|30|12|3|3|2|1|1	0	0	0	0	0	-58	0.14	0.88
ZNF563	P0C0S5	H2AFZ	4|2	6	3	2	6|14|0|0|1|2|0|0|0|2|2|1|6|0|3|5|0|2|3|2|7|2|5|0|4|5|8|8|2|40|10|12|30|12|3|3|2|1|1	0	0	0	0	0	-58	0.2	0.88
ZNF770	P0C0S5	H2AFZ	1|2	3	1.5	2	6|14|0|0|1|2|0|0|0|2|2|1|6|0|3|5|0|2|3|2|7|2|5|0|4|5|8|8|2|40|10|12|30|12|3|3|2|1|1	0	0	0	0	0	-61.4	0.1	0.88
ZSCAN30	P0C0S5	H2AFZ	13|12	25	12.5	2	6|14|0|0|1|2|0|0|0|2|2|1|6|0|3|5|0|2|3|2|7|2|5|0|4|5|8|8|2|40|10|12|30|12|3|3|2|1|1	0	0	0	0	0	-36.18	0.85	0.87
ZNF394	Q9BR39	JPH2	1|0	1	0.5	2	0|0|0|0|0|0|0|0|0|0|0|0|0|0|0|0|0|0|0|0|0|0|0|0|0|0|0|0|0|0|0|0|0|0|0|0|0|0|0	0	0	0	0	0	-3	5	0.88
ZNF322	Q9BR39	JPH2	2|2	4	2	2	0|0|0|0|0|0|0|0|0|0|0|0|0|0|0|0|0|0|0|0|0|0|0|0|0|0|0|0|0|0|0|0|0|0|0|0|0|0|0	0.82	0.82	0.82	0.82	0.82	1.54	20	0.04
ZNF513	O95251	KAT7	1|0	1	0.5	2	0|0|0|0|0|0|0|0|0|0|0|0|0|0|0|0|0|0|0|0|0|0|0|0|0|0|0|0|0|0|1|0|0|0|0|0|0|0|0	0	0	0	0	0	-2.99	5	0.88
ZNF189	O95251	KAT7	1|1	2	1	2	0|0|0|0|0|0|0|0|0|0|0|0|0|0|0|0|0|0|0|0|0|0|0|0|0|0|0|0|0|0|1|0|0|0|0|0|0|0|0	0	0	0	0	0	-0.68	10	0.88
ZNF610	O95251	KAT7	1|0	1	0.5	2	0|0|0|0|0|0|0|0|0|0|0|0|0|0|0|0|0|0|0|0|0|0|0|0|0|0|0|0|0|0|1|0|0|0|0|0|0|0|0	0	0	0	0	0	-2.99	5	0.88
PRDM1	Q13835	PKP1	1|0	1	0.5	2	0|0|0|0|0|0|0|0|0|0|0|0|0|0|0|0|0|0|0|0|0|0|0|0|0|0|0|0|0|0|0|2|1|2|1|1|2|0|0	0	0	0	0	0	-5.88	0.56	0.88
ZNF214	P02545	LMNA	2|0	2	1	2	0|8|1|0|0|0|0|0|0|0|0|0|0|0|0|2|0|0|8|1|1|0|0|2|0|3|5|3|0|6|5|9|7|9|0|0|2|0|0	0	0	0	0	0	-29.05	0.16	0.85
ZNF331	P02545	LMNA	0|4	4	2	2	0|8|1|0|0|0|0|0|0|0|0|0|0|0|0|2|0|0|8|1|1|0|0|2|0|3|5|3|0|6|5|9|7|9|0|0|2|0|0	0	0	0	0	0	-29.05	0.32	0.84
ZNF34	P02545	LMNA	1|0	1	0.5	2	0|8|1|0|0|0|0|0|0|0|0|0|0|0|0|2|0|0|8|1|1|0|0|2|0|3|5|3|0|6|5|9|7|9|0|0|2|0|0	0	0	0	0	0	-29.05	0.08	0.88
ZNF596	P02545	LMNA	5|4	9	4.5	2	0|8|1|0|0|0|0|0|0|0|0|0|0|0|0|2|0|0|8|1|1|0|0|2|0|3|5|3|0|6|5|9|7|9|0|0|2|0|0	0	0	0	0	0	-19.21	0.71	0.83
ZNF594	P02545	LMNA	9|1	10	5	2	0|8|1|0|0|0|0|0|0|0|0|0|0|0|0|2|0|0|8|1|1|0|0|2|0|3|5|3|0|6|5|9|7|9|0|0|2|0|0	0	0	0	0	0	-25.81	0.79	0.79
ZNF595	P02545	LMNA	1|1	2	1	2	0|8|1|0|0|0|0|0|0|0|0|0|0|0|0|2|0|0|8|1|1|0|0|2|0|3|5|3|0|6|5|9|7|9|0|0|2|0|0	0	0	0	0	0	-25.81	0.16	0.88
ZNF71	P02545	LMNA	0|1	1	0.5	2	0|8|1|0|0|0|0|0|0|0|0|0|0|0|0|2|0|0|8|1|1|0|0|2|0|3|5|3|0|6|5|9|7|9|0|0|2|0|0	0	0	0	0	0	-29.05	0.08	0.88
ZNF816	P02545	LMNA	2|2	4	2	2	0|8|1|0|0|0|0|0|0|0|0|0|0|0|0|2|0|0|8|1|1|0|0|2|0|3|5|3|0|6|5|9|7|9|0|0|2|0|0	0	0	0	0	0	-23.25	0.32	0.85
IKZF3	P02545	LMNA	0|1	1	0.5	2	0|8|1|0|0|0|0|0|0|0|0|0|0|0|0|2|0|0|8|1|1|0|0|2|0|3|5|3|0|6|5|9|7|9|0|0|2|0|0	0	0	0	0	0	-29.05	0.08	0.88
ZNF320	P02545	LMNA	1|1	2	1	2	0|8|1|0|0|0|0|0|0|0|0|0|0|0|0|2|0|0|8|1|1|0|0|2|0|3|5|3|0|6|5|9|7|9|0|0|2|0|0	0	0	0	0	0	-25.81	0.16	0.88
ZNF708	P02545	LMNA	1|0	1	0.5	2	0|8|1|0|0|0|0|0|0|0|0|0|0|0|0|2|0|0|8|1|1|0|0|2|0|3|5|3|0|6|5|9|7|9|0|0|2|0|0	0	0	0	0	0	-29.05	0.08	0.88
FEZF1	P02545	LMNA	0|1	1	0.5	2	0|8|1|0|0|0|0|0|0|0|0|0|0|0|0|2|0|0|8|1|1|0|0|2|0|3|5|3|0|6|5|9|7|9|0|0|2|0|0	0	0	0	0	0	-29.05	0.08	0.88
ZBTB14	P02545	LMNA	0|1	1	0.5	2	0|8|1|0|0|0|0|0|0|0|0|0|0|0|0|2|0|0|8|1|1|0|0|2|0|3|5|3|0|6|5|9|7|9|0|0|2|0|0	0	0	0	0	0	-29.05	0.08	0.88
KLF7	P02545	LMNA	4|0	4	2	2	0|8|1|0|0|0|0|0|0|0|0|0|0|0|0|2|0|0|8|1|1|0|0|2|0|3|5|3|0|6|5|9|7|9|0|0|2|0|0	0	0	0	0	0	-29.05	0.32	0.84
ZNF436	P02545	LMNA	1|0	1	0.5	2	0|8|1|0|0|0|0|0|0|0|0|0|0|0|0|2|0|0|8|1|1|0|0|2|0|3|5|3|0|6|5|9|7|9|0|0|2|0|0	0	0	0	0	0	-29.05	0.08	0.88
ZNF768	P02545	LMNA	0|1	1	0.5	2	0|8|1|0|0|0|0|0|0|0|0|0|0|0|0|2|0|0|8|1|1|0|0|2|0|3|5|3|0|6|5|9|7|9|0|0|2|0|0	0	0	0	0	0	-29.05	0.08	0.88
KLF1	P02545	LMNA	22|3	25	12.5	2	0|8|1|0|0|0|0|0|0|0|0|0|0|0|0|2|0|0|8|1|1|0|0|2|0|3|5|3|0|6|5|9|7|9|0|0|2|0|0	0.5	0.99	0.5	0.99	0.5	-21.09	1.98	0.18
ZNF513	P02545	LMNA	0|2	2	1	2	0|8|1|0|0|0|0|0|0|0|0|0|0|0|0|2|0|0|8|1|1|0|0|2|0|3|5|3|0|6|5|9|7|9|0|0|2|0|0	0	0	0	0	0	-29.05	0.16	0.85
ZNF667	P02545	LMNA	1|1	2	1	2	0|8|1|0|0|0|0|0|0|0|0|0|0|0|0|2|0|0|8|1|1|0|0|2|0|3|5|3|0|6|5|9|7|9|0|0|2|0|0	0	0	0	0	0	-25.81	0.16	0.88
ZFP28	P02545	LMNA	1|0	1	0.5	2	0|8|1|0|0|0|0|0|0|0|0|0|0|0|0|2|0|0|8|1|1|0|0|2|0|3|5|3|0|6|5|9|7|9|0|0|2|0|0	0	0	0	0	0	-29.05	0.08	0.88
ZBTB6	P02545	LMNA	3|3	6	3	2	0|8|1|0|0|0|0|0|0|0|0|0|0|0|0|2|0|0|8|1|1|0|0|2|0|3|5|3|0|6|5|9|7|9|0|0|2|0|0	0	0	0	0	0	-21.09	0.48	0.84
ZNF322	P02545	LMNA	33|31	64	32	2	0|8|1|0|0|0|0|0|0|0|0|0|0|0|0|2|0|0|8|1|1|0|0|2|0|3|5|3|0|6|5|9|7|9|0|0|2|0|0	1	1	1	1	1	14.61	5.08	0
ZNF189	P02545	LMNA	1|1	2	1	2	0|8|1|0|0|0|0|0|0|0|0|0|0|0|0|2|0|0|8|1|1|0|0|2|0|3|5|3|0|6|5|9|7|9|0|0|2|0|0	0	0	0	0	0	-25.81	0.16	0.88
PATZ1	P02545	LMNA	0|2	2	1	2	0|8|1|0|0|0|0|0|0|0|0|0|0|0|0|2|0|0|8|1|1|0|0|2|0|3|5|3|0|6|5|9|7|9|0|0|2|0|0	0	0	0	0	0	-29.05	0.16	0.85
ZNF610	P02545	LMNA	4|5	9	4.5	2	0|8|1|0|0|0|0|0|0|0|0|0|0|0|0|2|0|0|8|1|1|0|0|2|0|3|5|3|0|6|5|9|7|9|0|0|2|0|0	0	0	0	0	0	-19.21	0.71	0.83
ZNF549	P02545	LMNA	0|1	1	0.5	2	0|8|1|0|0|0|0|0|0|0|0|0|0|0|0|2|0|0|8|1|1|0|0|2|0|3|5|3|0|6|5|9|7|9|0|0|2|0|0	0	0	0	0	0	-29.05	0.08	0.88
MAZ	P02545	LMNA	0|14	14	7	2	0|8|1|0|0|0|0|0|0|0|0|0|0|0|0|2|0|0|8|1|1|0|0|2|0|3|5|3|0|6|5|9|7|9|0|0|2|0|0	0	0.01	0	0.01	0	-29.05	1.11	0.68
ZNF547	P02545	LMNA	1|0	1	0.5	2	0|8|1|0|0|0|0|0|0|0|0|0|0|0|0|2|0|0|8|1|1|0|0|2|0|3|5|3|0|6|5|9|7|9|0|0|2|0|0	0	0	0	0	0	-29.05	0.08	0.88
PRDM1	P02545	LMNA	1|0	1	0.5	2	0|8|1|0|0|0|0|0|0|0|0|0|0|0|0|2|0|0|8|1|1|0|0|2|0|3|5|3|0|6|5|9|7|9|0|0|2|0|0	0	0	0	0	0	-29.05	0.08	0.88
ZNF778	P02545	LMNA	1|1	2	1	2	0|8|1|0|0|0|0|0|0|0|0|0|0|0|0|2|0|0|8|1|1|0|0|2|0|3|5|3|0|6|5|9|7|9|0|0|2|0|0	0	0	0	0	0	-25.81	0.16	0.88
ZNF37A	P02545	LMNA	2|0	2	1	2	0|8|1|0|0|0|0|0|0|0|0|0|0|0|0|2|0|0|8|1|1|0|0|2|0|3|5|3|0|6|5|9|7|9|0|0|2|0|0	0	0	0	0	0	-29.05	0.16	0.85
ZNF394	P02545	LMNA	7|5	12	6	2	0|8|1|0|0|0|0|0|0|0|0|0|0|0|0|2|0|0|8|1|1|0|0|2|0|3|5|3|0|6|5|9|7|9|0|0|2|0|0	0	0	0	0	0	-17.54	0.95	0.82
ZSCAN30	P02545	LMNA	4|9	13	6.5	2	0|8|1|0|0|0|0|0|0|0|0|0|0|0|0|2|0|0|8|1|1|0|0|2|0|3|5|3|0|6|5|9|7|9|0|0|2|0|0	0	0	0	0	0	-19.21	1.03	0.79
ZNF331	P40429	RPL13A	1|2	3	1.5	2	0|0|0|0|0|0|0|0|0|2|0|0|0|0|0|0|0|0|0|0|0|0|0|0|0|0|0|2|0|3|5|2|5|2|1|1|1|12|11	0	0	0	0	0	-17.77	0.33	0.82
ZNF692	P40429	RPL13A	2|2	4	2	2	0|0|0|0|0|0|0|0|0|2|0|0|0|0|0|0|0|0|0|0|0|0|0|0|0|0|0|2|0|3|5|2|5|2|1|1|1|12|11	0	0	0	0	0	-15.55	0.44	0.82
ZNF595	P40429	RPL13A	1|0	1	0.5	2	0|0|0|0|0|0|0|0|0|2|0|0|0|0|0|0|0|0|0|0|0|0|0|0|0|0|0|2|0|3|5|2|5|2|1|1|1|12|11	0	0	0	0	0	-20.68	0.11	0.88
ZNF34	P40429	RPL13A	0|1	1	0.5	2	0|0|0|0|0|0|0|0|0|2|0|0|0|0|0|0|0|0|0|0|0|0|0|0|0|0|0|2|0|3|5|2|5|2|1|1|1|12|11	0	0	0	0	0	-20.68	0.11	0.88
ZNF596	P40429	RPL13A	1|3	4	2	2	0|0|0|0|0|0|0|0|0|2|0|0|0|0|0|0|0|0|0|0|0|0|0|0|0|0|0|2|0|3|5|2|5|2|1|1|1|12|11	0	0	0	0	0	-17.77	0.44	0.81
ZNF490	P40429	RPL13A	1|1	2	1	2	0|0|0|0|0|0|0|0|0|2|0|0|0|0|0|0|0|0|0|0|0|0|0|0|0|0|0|2|0|3|5|2|5|2|1|1|1|12|11	0	0	0	0	0	-17.77	0.22	0.88
ZNF71	P40429	RPL13A	2|4	6	3	2	0|0|0|0|0|0|0|0|0|2|0|0|0|0|0|0|0|0|0|0|0|0|0|0|0|0|0|2|0|3|5|2|5|2|1|1|1|12|11	0	0	0	0	0	-15.55	0.67	0.8
ZBTB6	P40429	RPL13A	1|0	1	0.5	2	0|0|0|0|0|0|0|0|0|2|0|0|0|0|0|0|0|0|0|0|0|0|0|0|0|0|0|2|0|3|5|2|5|2|1|1|1|12|11	0	0	0	0	0	-20.68	0.11	0.88
ZNF708	P40429	RPL13A	1|1	2	1	2	0|0|0|0|0|0|0|0|0|2|0|0|0|0|0|0|0|0|0|0|0|0|0|0|0|0|0|2|0|3|5|2|5|2|1|1|1|12|11	0	0	0	0	0	-17.77	0.22	0.88
FEZF1	P40429	RPL13A	0|1	1	0.5	2	0|0|0|0|0|0|0|0|0|2|0|0|0|0|0|0|0|0|0|0|0|0|0|0|0|0|0|2|0|3|5|2|5|2|1|1|1|12|11	0	0	0	0	0	-20.68	0.11	0.88
MZF1	P40429	RPL13A	3|2	5	2.5	2	0|0|0|0|0|0|0|0|0|2|0|0|0|0|0|0|0|0|0|0|0|0|0|0|0|0|0|2|0|3|5|2|5|2|1|1|1|12|11	0	0	0	0	0	-15.55	0.56	0.81
ZBTB14	P40429	RPL13A	1|1	2	1	2	0|0|0|0|0|0|0|0|0|2|0|0|0|0|0|0|0|0|0|0|0|0|0|0|0|0|0|2|0|3|5|2|5|2|1|1|1|12|11	0	0	0	0	0	-17.77	0.22	0.88
ZNF8	P40429	RPL13A	1|0	1	0.5	2	0|0|0|0|0|0|0|0|0|2|0|0|0|0|0|0|0|0|0|0|0|0|0|0|0|0|0|2|0|3|5|2|5|2|1|1|1|12|11	0	0	0	0	0	-20.68	0.11	0.88
ZNF436	P40429	RPL13A	3|4	7	3.5	2	0|0|0|0|0|0|0|0|0|2|0|0|0|0|0|0|0|0|0|0|0|0|0|0|0|0|0|2|0|3|5|2|5|2|1|1|1|12|11	0	0	0	0	0	-13.72	0.78	0.8
ZNF768	P40429	RPL13A	3|3	6	3	2	0|0|0|0|0|0|0|0|0|2|0|0|0|0|0|0|0|0|0|0|0|0|0|0|0|0|0|2|0|3|5|2|5|2|1|1|1|12|11	0	0	0	0	0	-13.72	0.67	0.8
ZNF419	P40429	RPL13A	2|2	4	2	2	0|0|0|0|0|0|0|0|0|2|0|0|0|0|0|0|0|0|0|0|0|0|0|0|0|0|0|2|0|3|5|2|5|2|1|1|1|12|11	0	0	0	0	0	-15.55	0.44	0.82
ZNF667	P40429	RPL13A	1|1	2	1	2	0|0|0|0|0|0|0|0|0|2|0|0|0|0|0|0|0|0|0|0|0|0|0|0|0|0|0|2|0|3|5|2|5|2|1|1|1|12|11	0	0	0	0	0	-17.77	0.22	0.88
ZNF184	P40429	RPL13A	1|1	2	1	2	0|0|0|0|0|0|0|0|0|2|0|0|0|0|0|0|0|0|0|0|0|0|0|0|0|0|0|2|0|3|5|2|5|2|1|1|1|12|11	0	0	0	0	0	-17.77	0.22	0.88
ZFP28	P40429	RPL13A	0|1	1	0.5	2	0|0|0|0|0|0|0|0|0|2|0|0|0|0|0|0|0|0|0|0|0|0|0|0|0|0|0|2|0|3|5|2|5|2|1|1|1|12|11	0	0	0	0	0	-20.68	0.11	0.88
ZNF320	P40429	RPL13A	1|0	1	0.5	2	0|0|0|0|0|0|0|0|0|2|0|0|0|0|0|0|0|0|0|0|0|0|0|0|0|0|0|2|0|3|5|2|5|2|1|1|1|12|11	0	0	0	0	0	-20.68	0.11	0.88
ZNF189	P40429	RPL13A	1|1	2	1	2	0|0|0|0|0|0|0|0|0|2|0|0|0|0|0|0|0|0|0|0|0|0|0|0|0|0|0|2|0|3|5|2|5|2|1|1|1|12|11	0	0	0	0	0	-17.77	0.22	0.88
OSR2	P40429	RPL13A	2|2	4	2	2	0|0|0|0|0|0|0|0|0|2|0|0|0|0|0|0|0|0|0|0|0|0|0|0|0|0|0|2|0|3|5|2|5|2|1|1|1|12|11	0	0	0	0	0	-15.55	0.44	0.82
ZFP82	P40429	RPL13A	2|3	5	2.5	2	0|0|0|0|0|0|0|0|0|2|0|0|0|0|0|0|0|0|0|0|0|0|0|0|0|0|0|2|0|3|5|2|5|2|1|1|1|12|11	0	0	0	0	0	-15.55	0.56	0.81
KLF1	P40429	RPL13A	0|1	1	0.5	2	0|0|0|0|0|0|0|0|0|2|0|0|0|0|0|0|0|0|0|0|0|0|0|0|0|0|0|2|0|3|5|2|5|2|1|1|1|12|11	0	0	0	0	0	-20.68	0.11	0.88
ZNF549	P40429	RPL13A	0|1	1	0.5	2	0|0|0|0|0|0|0|0|0|2|0|0|0|0|0|0|0|0|0|0|0|0|0|0|0|0|0|2|0|3|5|2|5|2|1|1|1|12|11	0	0	0	0	0	-20.68	0.11	0.88
ZBTB42	P40429	RPL13A	1|1	2	1	2	0|0|0|0|0|0|0|0|0|2|0|0|0|0|0|0|0|0|0|0|0|0|0|0|0|0|0|2|0|3|5|2|5|2|1|1|1|12|11	0	0	0	0	0	-17.77	0.22	0.88
PRDM1	P40429	RPL13A	0|5	5	2.5	2	0|0|0|0|0|0|0|0|0|2|0|0|0|0|0|0|0|0|0|0|0|0|0|0|0|0|0|2|0|3|5|2|5|2|1|1|1|12|11	0	0	0	0	0	-20.68	0.56	0.78
ZNF778	P40429	RPL13A	2|2	4	2	2	0|0|0|0|0|0|0|0|0|2|0|0|0|0|0|0|0|0|0|0|0|0|0|0|0|0|0|2|0|3|5|2|5|2|1|1|1|12|11	0	0	0	0	0	-15.55	0.44	0.82
ZNF563	P40429	RPL13A	2|2	4	2	2	0|0|0|0|0|0|0|0|0|2|0|0|0|0|0|0|0|0|0|0|0|0|0|0|0|0|0|2|0|3|5|2|5|2|1|1|1|12|11	0	0	0	0	0	-15.55	0.44	0.82
ZNF770	P40429	RPL13A	1|1	2	1	2	0|0|0|0|0|0|0|0|0|2|0|0|0|0|0|0|0|0|0|0|0|0|0|0|0|0|0|2|0|3|5|2|5|2|1|1|1|12|11	0	0	0	0	0	-17.77	0.22	0.88
ZNF708	Q13838	DDX39B	10|0	10	5	2	0|23|8|0|0|0|0|0|0|0|0|0|0|0|0|0|0|0|0|0|27|0|0|0|0|13|17|12|0|12|18|8|17|8|7|0|0|0|0	0	0	0	0	0	-69.67	0.32	0.87
ZNF594	Q13838	DDX39B	26|7	33	16.5	2	0|23|8|0|0|0|0|0|0|0|0|0|0|0|0|0|0|0|0|0|27|0|0|0|0|13|17|12|0|12|18|8|17|8|7|0|0|0|0	0	0	0	0	0	-49.12	1.06	0.85
ZNF320	Q13838	DDX39B	10|0	10	5	2	0|23|8|0|0|0|0|0|0|0|0|0|0|0|0|0|0|0|0|0|27|0|0|0|0|13|17|12|0|12|18|8|17|8|7|0|0|0|0	0	0	0	0	0	-69.67	0.32	0.87
ZNF322	Q13838	DDX39B	25|29	54	27	2	0|23|8|0|0|0|0|0|0|0|0|0|0|0|0|0|0|0|0|0|27|0|0|0|0|13|17|12|0|12|18|8|17|8|7|0|0|0|0	0	0	0	0	0	-21.86	1.74	0.83
ZNF250	Q13838	DDX39B	8|11	19	9.5	2	0|23|8|0|0|0|0|0|0|0|0|0|0|0|0|0|0|0|0|0|27|0|0|0|0|13|17|12|0|12|18|8|17|8|7|0|0|0|0	0	0	0	0	0	-47.03	0.61	0.87
MAZ	Q13838	DDX39B	1|35	36	18	2	0|23|8|0|0|0|0|0|0|0|0|0|0|0|0|0|0|0|0|0|27|0|0|0|0|13|17|12|0|12|18|8|17|8|7|0|0|0|0	0	0	0	0	0	-65.52	1.16	0.79
OSR2	Q13838	DDX39B	0|10	10	5	2	0|23|8|0|0|0|0|0|0|0|0|0|0|0|0|0|0|0|0|0|27|0|0|0|0|13|17|12|0|12|18|8|17|8|7|0|0|0|0	0	0	0	0	0	-69.67	0.32	0.87
ZNF331	Q13838	DDX39B	0|16	16	8	2	0|23|8|0|0|0|0|0|0|0|0|0|0|0|0|0|0|0|0|0|27|0|0|0|0|13|17|12|0|12|18|8|17|8|7|0|0|0|0	0	0	0	0	0	-69.67	0.52	0.87
ZNF547	Q13838	DDX39B	6|0	6	3	2	0|23|8|0|0|0|0|0|0|0|0|0|0|0|0|0|0|0|0|0|27|0|0|0|0|13|17|12|0|12|18|8|17|8|7|0|0|0|0	0	0	0	0	0	-69.67	0.19	0.88
ZNF436	Q13838	DDX39B	11|10	21	10.5	2	0|23|8|0|0|0|0|0|0|0|0|0|0|0|0|0|0|0|0|0|27|0|0|0|0|13|17|12|0|12|18|8|17|8|7|0|0|0|0	0	0	0	0	0	-43.19	0.68	0.87
SCRT1	Q13838	DDX39B	12|7	19	9.5	2	0|23|8|0|0|0|0|0|0|0|0|0|0|0|0|0|0|0|0|0|27|0|0|0|0|13|17|12|0|12|18|8|17|8|7|0|0|0|0	0	0	0	0	0	-49.12	0.61	0.87
PRDM1	Q13838	DDX39B	0|12	12	6	2	0|23|8|0|0|0|0|0|0|0|0|0|0|0|0|0|0|0|0|0|27|0|0|0|0|13|17|12|0|12|18|8|17|8|7|0|0|0|0	0	0	0	0	0	-69.67	0.39	0.87
KLF1	Q13838	DDX39B	21|10	31	15.5	2	0|23|8|0|0|0|0|0|0|0|0|0|0|0|0|0|0|0|0|0|27|0|0|0|0|13|17|12|0|12|18|8|17|8|7|0|0|0|0	0	0	0	0	0	-43.19	1	0.86
ZSCAN5C	Q13838	DDX39B	0|5	5	2.5	2	0|23|8|0|0|0|0|0|0|0|0|0|0|0|0|0|0|0|0|0|27|0|0|0|0|13|17|12|0|12|18|8|17|8|7|0|0|0|0	0	0	0	0	0	-69.67	0.16	0.88
PATZ1	Q13838	DDX39B	0|14	14	7	2	0|23|8|0|0|0|0|0|0|0|0|0|0|0|0|0|0|0|0|0|27|0|0|0|0|13|17|12|0|12|18|8|17|8|7|0|0|0|0	0	0	0	0	0	-69.67	0.45	0.87
ZIM3	Q13838	DDX39B	0|11	11	5.5	2	0|23|8|0|0|0|0|0|0|0|0|0|0|0|0|0|0|0|0|0|27|0|0|0|0|13|17|12|0|12|18|8|17|8|7|0|0|0|0	0	0	0	0	0	-69.67	0.35	0.87
ZNF563	Q13838	DDX39B	0|11	11	5.5	2	0|23|8|0|0|0|0|0|0|0|0|0|0|0|0|0|0|0|0|0|27|0|0|0|0|13|17|12|0|12|18|8|17|8|7|0|0|0|0	0	0	0	0	0	-69.67	0.35	0.87
ZNF394	Q13838	DDX39B	10|8	18	9	2	0|23|8|0|0|0|0|0|0|0|0|0|0|0|0|0|0|0|0|0|27|0|0|0|0|13|17|12|0|12|18|8|17|8|7|0|0|0|0	0	0	0	0	0	-47.03	0.58	0.87
IKZF3	Q13838	DDX39B	29|11	40	20	2	0|23|8|0|0|0|0|0|0|0|0|0|0|0|0|0|0|0|0|0|27|0|0|0|0|13|17|12|0|12|18|8|17|8|7|0|0|0|0	0	0	0	0	0	-41.42	1.29	0.83
ZSCAN30	Q13838	DDX39B	18|21	39	19.5	2	0|23|8|0|0|0|0|0|0|0|0|0|0|0|0|0|0|0|0|0|27|0|0|0|0|13|17|12|0|12|18|8|17|8|7|0|0|0|0	0	0	0	0	0	-30.79	1.26	0.86
ZNF582	Q86V35	CABP7	4|4	8	4	2	0|0|0|0|0|0|0|0|0|0|0|0|0|0|0|0|0|0|0|0|0|0|0|0|0|0|0|0|0|0|0|0|0|0|0|0|0|0|0	0.99	0.99	0.99	0.99	0.99	5.13	40	0
ZNF331	Q9Y4W2	LAS1L	2|1	3	1.5	2	0|0|0|0|0|0|0|0|0|0|0|0|0|0|0|0|0|0|0|0|0|0|0|0|1|0|0|0|0|1|1|0|1|0|0|0|1|0|0	0.09	0.18	0.09	0.18	0.09	-2.83	3	0.51
ZNF250	Q9Y4W2	LAS1L	0|1	1	0.5	2	0|0|0|0|0|0|0|0|0|0|0|0|0|0|0|0|0|0|0|0|0|0|0|0|1|0|0|0|0|1|1|0|1|0|0|0|1|0|0	0	0	0	0	0	-4.44	1	0.88
ZNF257	Q9Y4W2	LAS1L	4|5	9	4.5	2	0|0|0|0|0|0|0|0|0|0|0|0|0|0|0|0|0|0|0|0|0|0|0|0|1|0|0|0|0|1|1|0|1|0|0|0|1|0|0	0.86	0.94	0.86	0.94	0.86	1.24	9	0.03
ZNF34	Q9Y4W2	LAS1L	7|5	12	6	2	0|0|0|0|0|0|0|0|0|0|0|0|0|0|0|0|0|0|0|0|0|0|0|0|1|0|0|0|0|1|1|0|1|0|0|0|1|0|0	0.97	1	0.97	1	0.97	2.67	12	0.01
ZNF18	Q9Y4W2	LAS1L	4|4	8	4	2	0|0|0|0|0|0|0|0|0|0|0|0|0|0|0|0|0|0|0|0|0|0|0|0|1|0|0|0|0|1|1|0|1|0|0|0|1|0|0	0.78	0.78	0.78	0.78	0.78	1.24	8	0.06
ZNF490	Q9Y4W2	LAS1L	3|4	7	3.5	2	0|0|0|0|0|0|0|0|0|0|0|0|0|0|0|0|0|0|0|0|0|0|0|0|1|0|0|0|0|1|1|0|1|0|0|0|1|0|0	0.62	0.78	0.62	0.78	0.62	-0.16	7	0.09
ZNF16	Q9Y4W2	LAS1L	6|1	7	3.5	2	0|0|0|0|0|0|0|0|0|0|0|0|0|0|0|0|0|0|0|0|0|0|0|0|1|0|0|0|0|1|1|0|1|0|0|0|1|0|0	0.49	0.98	0.49	0.98	0.49	-2.83	7	0.19
ZNF71	Q9Y4W2	LAS1L	2|3	5	2.5	2	0|0|0|0|0|0|0|0|0|0|0|0|0|0|0|0|0|0|0|0|0|0|0|0|1|0|0|0|0|1|1|0|1|0|0|0|1|0|0	0.32	0.46	0.32	0.46	0.32	-1.5	5	0.36
ZSCAN5C	Q9Y4W2	LAS1L	2|0	2	1	2	0|0|0|0|0|0|0|0|0|0|0|0|0|0|0|0|0|0|0|0|0|0|0|0|1|0|0|0|0|1|1|0|1|0|0|0|1|0|0	0.09	0.18	0.09	0.18	0.09	-4.44	2	0.51
ZNF140	Q9Y4W2	LAS1L	2|0	2	1	2	0|0|0|0|0|0|0|0|0|0|0|0|0|0|0|0|0|0|0|0|0|0|0|0|1|0|0|0|0|1|1|0|1|0|0|0|1|0|0	0.09	0.18	0.09	0.18	0.09	-4.44	2	0.51
ZNF708	Q9Y4W2	LAS1L	3|3	6	3	2	0|0|0|0|0|0|0|0|0|0|0|0|0|0|0|0|0|0|0|0|0|0|0|0|1|0|0|0|0|1|1|0|1|0|0|0|1|0|0	0.46	0.46	0.46	0.46	0.46	-0.16	6	0.23
FEZF1	Q9Y4W2	LAS1L	6|3	9	4.5	2	0|0|0|0|0|0|0|0|0|0|0|0|0|0|0|0|0|0|0|0|0|0|0|0|1|0|0|0|0|1|1|0|1|0|0|0|1|0|0	0.72	0.98	0.72	0.98	0.72	-0.16	9	0.07
MZF1	Q9Y4W2	LAS1L	3|1	4	2	2	0|0|0|0|0|0|0|0|0|0|0|0|0|0|0|0|0|0|0|0|0|0|0|0|1|0|0|0|0|1|1|0|1|0|0|0|1|0|0	0.23	0.46	0.23	0.46	0.23	-2.83	4	0.41
ZNF8	Q9Y4W2	LAS1L	0|2	2	1	2	0|0|0|0|0|0|0|0|0|0|0|0|0|0|0|0|0|0|0|0|0|0|0|0|1|0|0|0|0|1|1|0|1|0|0|0|1|0|0	0.09	0.18	0.09	0.18	0.09	-4.44	2	0.51
KLF7	Q9Y4W2	LAS1L	1|4	5	2.5	2	0|0|0|0|0|0|0|0|0|0|0|0|0|0|0|0|0|0|0|0|0|0|0|0|1|0|0|0|0|1|1|0|1|0|0|0|1|0|0	0.39	0.78	0.39	0.78	0.39	-2.83	5	0.34
ZNF436	Q9Y4W2	LAS1L	0|4	4	2	2	0|0|0|0|0|0|0|0|0|0|0|0|0|0|0|0|0|0|0|0|0|0|0|0|1|0|0|0|0|1|1|0|1|0|0|0|1|0|0	0.39	0.78	0.39	0.78	0.39	-4.44	4	0.34
ZNF768	Q9Y4W2	LAS1L	16|12	28	14	2	0|0|0|0|0|0|0|0|0|0|0|0|0|0|0|0|0|0|0|0|0|0|0|0|1|0|0|0|0|1|1|0|1|0|0|0|1|0|0	1	1	1	1	1	12.86	28	0
ZNF419	Q9Y4W2	LAS1L	3|2	5	2.5	2	0|0|0|0|0|0|0|0|0|0|0|0|0|0|0|0|0|0|0|0|0|0|0|0|1|0|0|0|0|1|1|0|1|0|0|0|1|0|0	0.32	0.46	0.32	0.46	0.32	-1.5	5	0.36
ZNF418	Q9Y4W2	LAS1L	1|0	1	0.5	2	0|0|0|0|0|0|0|0|0|0|0|0|0|0|0|0|0|0|0|0|0|0|0|0|1|0|0|0|0|1|1|0|1|0|0|0|1|0|0	0	0	0	0	0	-4.44	1	0.88
ZNF513	Q9Y4W2	LAS1L	0|1	1	0.5	2	0|0|0|0|0|0|0|0|0|0|0|0|0|0|0|0|0|0|0|0|0|0|0|0|1|0|0|0|0|1|1|0|1|0|0|0|1|0|0	0	0	0	0	0	-4.44	1	0.88
ZNF667	Q9Y4W2	LAS1L	3|0	3	1.5	2	0|0|0|0|0|0|0|0|0|0|0|0|0|0|0|0|0|0|0|0|0|0|0|0|1|0|0|0|0|1|1|0|1|0|0|0|1|0|0	0.23	0.46	0.23	0.46	0.23	-4.44	3	0.41
ZFP28	Q9Y4W2	LAS1L	1|6	7	3.5	2	0|0|0|0|0|0|0|0|0|0|0|0|0|0|0|0|0|0|0|0|0|0|0|0|1|0|0|0|0|1|1|0|1|0|0|0|1|0|0	0.49	0.98	0.49	0.98	0.49	-2.83	7	0.19
ZNF320	Q9Y4W2	LAS1L	1|2	3	1.5	2	0|0|0|0|0|0|0|0|0|0|0|0|0|0|0|0|0|0|0|0|0|0|0|0|1|0|0|0|0|1|1|0|1|0|0|0|1|0|0	0.09	0.18	0.09	0.18	0.09	-2.83	3	0.51
ZNF329	Q9Y4W2	LAS1L	5|0	5	2.5	2	0|0|0|0|0|0|0|0|0|0|0|0|0|0|0|0|0|0|0|0|0|0|0|0|1|0|0|0|0|1|1|0|1|0|0|0|1|0|0	0.47	0.94	0.47	0.94	0.47	-4.44	5	0.22
ZNF189	Q9Y4W2	LAS1L	3|3	6	3	2	0|0|0|0|0|0|0|0|0|0|0|0|0|0|0|0|0|0|0|0|0|0|0|0|1|0|0|0|0|1|1|0|1|0|0|0|1|0|0	0.46	0.46	0.46	0.46	0.46	-0.16	6	0.23
OSR2	Q9Y4W2	LAS1L	3|1	4	2	2	0|0|0|0|0|0|0|0|0|0|0|0|0|0|0|0|0|0|0|0|0|0|0|0|1|0|0|0|0|1|1|0|1|0|0|0|1|0|0	0.23	0.46	0.23	0.46	0.23	-2.83	4	0.41
ZFP82	Q9Y4W2	LAS1L	8|18	26	13	2	0|0|0|0|0|0|0|0|0|0|0|0|0|0|0|0|0|0|0|0|0|0|0|0|1|0|0|0|0|1|1|0|1|0|0|0|1|0|0	1	1	1	1	1	7.02	26	0
ZNF610	Q9Y4W2	LAS1L	0|1	1	0.5	2	0|0|0|0|0|0|0|0|0|0|0|0|0|0|0|0|0|0|0|0|0|0|0|0|1|0|0|0|0|1|1|0|1|0|0|0|1|0|0	0	0	0	0	0	-4.44	1	0.88
ZNF502	Q9Y4W2	LAS1L	2|2	4	2	2	0|0|0|0|0|0|0|0|0|0|0|0|0|0|0|0|0|0|0|0|0|0|0|0|1|0|0|0|0|1|1|0|1|0|0|0|1|0|0	0.18	0.18	0.18	0.18	0.18	-1.5	4	0.43
GTF3A	Q9Y4W2	LAS1L	2|1	3	1.5	2	0|0|0|0|0|0|0|0|0|0|0|0|0|0|0|0|0|0|0|0|0|0|0|0|1|0|0|0|0|1|1|0|1|0|0|0|1|0|0	0.09	0.18	0.09	0.18	0.09	-2.83	3	0.51
ZBTB42	Q9Y4W2	LAS1L	3|0	3	1.5	2	0|0|0|0|0|0|0|0|0|0|0|0|0|0|0|0|0|0|0|0|0|0|0|0|1|0|0|0|0|1|1|0|1|0|0|0|1|0|0	0.23	0.46	0.23	0.46	0.23	-4.44	3	0.41
ZNF37A	Q9Y4W2	LAS1L	6|3	9	4.5	2	0|0|0|0|0|0|0|0|0|0|0|0|0|0|0|0|0|0|0|0|0|0|0|0|1|0|0|0|0|1|1|0|1|0|0|0|1|0|0	0.72	0.98	0.72	0.98	0.72	-0.16	9	0.07
ZNF563	Q9Y4W2	LAS1L	9|9	18	9	2	0|0|0|0|0|0|0|0|0|0|0|0|0|0|0|0|0|0|0|0|0|0|0|0|1|0|0|0|0|1|1|0|1|0|0|0|1|0|0	1	1	1	1	1	8.48	18	0
ZNF770	Q9Y4W2	LAS1L	1|4	5	2.5	2	0|0|0|0|0|0|0|0|0|0|0|0|0|0|0|0|0|0|0|0|0|0|0|0|1|0|0|0|0|1|1|0|1|0|0|0|1|0|0	0.39	0.78	0.39	0.78	0.39	-2.83	5	0.34
ZNF331	O00391	QSOX1	1|2	3	1.5	2	0|0|0|0|0|0|0|0|0|0|0|0|0|0|0|0|0|0|0|0|0|0|0|0|0|0|0|0|0|0|0|0|0|0|0|0|0|0|0	0.41	0.82	0.41	0.82	0.41	-0.49	15	0.28
ZNF669	Q969X0	RILPL2	0|1	1	0.5	2	0|0|0|0|0|0|0|0|0|0|0|0|0|0|0|0|0|0|0|0|0|0|0|0|0|0|0|0|0|0|0|0|0|0|0|0|0|0|0	0	0	0	0	0	-3	5	0.88
ZNF547	Q969X0	RILPL2	0|1	1	0.5	2	0|0|0|0|0|0|0|0|0|0|0|0|0|0|0|0|0|0|0|0|0|0|0|0|0|0|0|0|0|0|0|0|0|0|0|0|0|0|0	0	0	0	0	0	-3	5	0.88
GLIS1	Q969X0	RILPL2	0|1	1	0.5	2	0|0|0|0|0|0|0|0|0|0|0|0|0|0|0|0|0|0|0|0|0|0|0|0|0|0|0|0|0|0|0|0|0|0|0|0|0|0|0	0	0	0	0	0	-3	5	0.88
ZNF320	Q969X0	RILPL2	1|2	3	1.5	2	0|0|0|0|0|0|0|0|0|0|0|0|0|0|0|0|0|0|0|0|0|0|0|0|0|0|0|0|0|0|0|0|0|0|0|0|0|0|0	0.41	0.82	0.41	0.82	0.41	-0.49	15	0.28
ZNF708	P38570	ITGAE	2|0	2	1	2	0|1|0|0|0|0|0|0|0|0|0|0|0|0|0|0|0|0|2|2|1|0|0|0|0|2|2|0|0|0|0|0|0|0|0|0|0|0|0	0.02	0.04	0.02	0.04	0.02	-6.03	1	0.61
FEZF1	P38570	ITGAE	0|2	2	1	2	0|1|0|0|0|0|0|0|0|0|0|0|0|0|0|0|0|0|2|2|1|0|0|0|0|2|2|0|0|0|0|0|0|0|0|0|0|0|0	0.02	0.04	0.02	0.04	0.02	-6.03	1	0.61
ZNF331	P38570	ITGAE	0|2	2	1	2	0|1|0|0|0|0|0|0|0|0|0|0|0|0|0|0|0|0|2|2|1|0|0|0|0|2|2|0|0|0|0|0|0|0|0|0|0|0|0	0.02	0.04	0.02	0.04	0.02	-6.03	1	0.61
ZSCAN30	P38570	ITGAE	2|2	4	2	2	0|1|0|0|0|0|0|0|0|0|0|0|0|0|0|0|0|0|2|2|1|0|0|0|0|2|2|0|0|0|0|0|0|0|0|0|0|0|0	0.04	0.04	0.04	0.04	0.04	-3.17	2	0.57
ZNF394	P38570	ITGAE	1|1	2	1	2	0|1|0|0|0|0|0|0|0|0|0|0|0|0|0|0|0|0|2|2|1|0|0|0|0|2|2|0|0|0|0|0|0|0|0|0|0|0|0	0	0	0	0	0	-4.63	1	0.88
ZBTB14	P38570	ITGAE	0|2	2	1	2	0|1|0|0|0|0|0|0|0|0|0|0|0|0|0|0|0|0|2|2|1|0|0|0|0|2|2|0|0|0|0|0|0|0|0|0|0|0|0	0.02	0.04	0.02	0.04	0.02	-6.03	1	0.61
OSR2	P38570	ITGAE	0|2	2	1	2	0|1|0|0|0|0|0|0|0|0|0|0|0|0|0|0|0|0|2|2|1|0|0|0|0|2|2|0|0|0|0|0|0|0|0|0|0|0|0	0.02	0.04	0.02	0.04	0.02	-6.03	1	0.61
ZNF768	P38570	ITGAE	0|1	1	0.5	2	0|1|0|0|0|0|0|0|0|0|0|0|0|0|0|0|0|0|2|2|1|0|0|0|0|2|2|0|0|0|0|0|0|0|0|0|0|0|0	0	0	0	0	0	-6.03	0.5	0.88
ZNF34	P38570	ITGAE	0|1	1	0.5	2	0|1|0|0|0|0|0|0|0|0|0|0|0|0|0|0|0|0|2|2|1|0|0|0|0|2|2|0|0|0|0|0|0|0|0|0|0|0|0	0	0	0	0	0	-6.03	0.5	0.88
ZNF436	P38570	ITGAE	0|2	2	1	2	0|1|0|0|0|0|0|0|0|0|0|0|0|0|0|0|0|0|2|2|1|0|0|0|0|2|2|0|0|0|0|0|0|0|0|0|0|0|0	0.02	0.04	0.02	0.04	0.02	-6.03	1	0.61
SCRT1	P38570	ITGAE	2|2	4	2	2	0|1|0|0|0|0|0|0|0|0|0|0|0|0|0|0|0|0|2|2|1|0|0|0|0|2|2|0|0|0|0|0|0|0|0|0|0|0|0	0.04	0.04	0.04	0.04	0.04	-3.17	2	0.57
PRDM1	P38570	ITGAE	1|2	3	1.5	2	0|1|0|0|0|0|0|0|0|0|0|0|0|0|0|0|0|0|2|2|1|0|0|0|0|2|2|0|0|0|0|0|0|0|0|0|0|0|0	0.02	0.04	0.02	0.04	0.02	-4.63	1.5	0.61
ZNF594	P38570	ITGAE	2|1	3	1.5	2	0|1|0|0|0|0|0|0|0|0|0|0|0|0|0|0|0|0|2|2|1|0|0|0|0|2|2|0|0|0|0|0|0|0|0|0|0|0|0	0.02	0.04	0.02	0.04	0.02	-4.63	1.5	0.61
ZNF490	P38570	ITGAE	1|1	2	1	2	0|1|0|0|0|0|0|0|0|0|0|0|0|0|0|0|0|0|2|2|1|0|0|0|0|2|2|0|0|0|0|0|0|0|0|0|0|0|0	0	0	0	0	0	-4.63	1	0.88
ZBTB6	P38570	ITGAE	1|1	2	1	2	0|1|0|0|0|0|0|0|0|0|0|0|0|0|0|0|0|0|2|2|1|0|0|0|0|2|2|0|0|0|0|0|0|0|0|0|0|0|0	0	0	0	0	0	-4.63	1	0.88
ZNF71	P38570	ITGAE	2|0	2	1	2	0|1|0|0|0|0|0|0|0|0|0|0|0|0|0|0|0|0|2|2|1|0|0|0|0|2|2|0|0|0|0|0|0|0|0|0|0|0|0	0.02	0.04	0.02	0.04	0.02	-6.03	1	0.61
ZNF563	P38570	ITGAE	2|2	4	2	2	0|1|0|0|0|0|0|0|0|0|0|0|0|0|0|0|0|0|2|2|1|0|0|0|0|2|2|0|0|0|0|0|0|0|0|0|0|0|0	0.04	0.04	0.04	0.04	0.04	-3.17	2	0.57
ZNF320	P38570	ITGAE	2|0	2	1	2	0|1|0|0|0|0|0|0|0|0|0|0|0|0|0|0|0|0|2|2|1|0|0|0|0|2|2|0|0|0|0|0|0|0|0|0|0|0|0	0.02	0.04	0.02	0.04	0.02	-6.03	1	0.61
IKZF3	P02769	P02769	4|6	10	5	2	3|19|4|7|65|0|56|28|2|15|9|12|13|322|15|29|8|16|26|31|33|10|10|3|2|11|21|8|16|0|0|0|0|0|0|0|0|0|0	0	0	0	0	0	-261.68	0.08	0.88
ZNF331	P02769	P02769	12|23	35	17.5	2	3|19|4|7|65|0|56|28|2|15|9|12|13|322|15|29|8|16|26|31|33|10|10|3|2|11|21|8|16|0|0|0|0|0|0|0|0|0|0	0	0	0	0	0	-234.07	0.28	0.88
ZNF250	P02769	P02769	8|8	16	8	2	3|19|4|7|65|0|56|28|2|15|9|12|13|322|15|29|8|16|26|31|33|10|10|3|2|11|21|8|16|0|0|0|0|0|0|0|0|0|0	0	0	0	0	0	-246.9	0.13	0.88
GLIS1	P02769	P02769	4|4	8	4	2	3|19|4|7|65|0|56|28|2|15|9|12|13|322|15|29|8|16|26|31|33|10|10|3|2|11|21|8|16|0|0|0|0|0|0|0|0|0|0	0	0	0	0	0	-261.68	0.06	0.88
ZNF34	P02769	P02769	3|3	6	3	2	3|19|4|7|65|0|56|28|2|15|9|12|13|322|15|29|8|16|26|31|33|10|10|3|2|11|21|8|16|0|0|0|0|0|0|0|0|0|0	0	0	0	0	0	-265.84	0.05	0.88
SCRT1	P02769	P02769	22|20	42	21	2	3|19|4|7|65|0|56|28|2|15|9|12|13|322|15|29|8|16|26|31|33|10|10|3|2|11|21|8|16|0|0|0|0|0|0|0|0|0|0	0	0	0	0	0	-211.95	0.33	0.88
ZNF594	P02769	P02769	46|3	49	24.5	2	3|19|4|7|65|0|56|28|2|15|9|12|13|322|15|29|8|16|26|31|33|10|10|3|2|11|21|8|16|0|0|0|0|0|0|0|0|0|0	0	0	0	0	0	-265.84	0.39	0.88
ZNF490	P02769	P02769	28|3	31	15.5	2	3|19|4|7|65|0|56|28|2|15|9|12|13|322|15|29|8|16|26|31|33|10|10|3|2|11|21|8|16|0|0|0|0|0|0|0|0|0|0	0	0	0	0	0	-265.84	0.25	0.88
ZNF16	P02769	P02769	0|1	1	0.5	2	3|19|4|7|65|0|56|28|2|15|9|12|13|322|15|29|8|16|26|31|33|10|10|3|2|11|21|8|16|0|0|0|0|0|0|0|0|0|0	0	0	0	0	0	-280.69	0.01	0.88
ZNF71	P02769	P02769	0|13	13	6.5	2	3|19|4|7|65|0|56|28|2|15|9|12|13|322|15|29|8|16|26|31|33|10|10|3|2|11|21|8|16|0|0|0|0|0|0|0|0|0|0	0	0	0	0	0	-280.69	0.1	0.88
ZNF816	P02769	P02769	0|1	1	0.5	2	3|19|4|7|65|0|56|28|2|15|9|12|13|322|15|29|8|16|26|31|33|10|10|3|2|11|21|8|16|0|0|0|0|0|0|0|0|0|0	0	0	0	0	0	-280.69	0.01	0.88
ZSCAN5C	P02769	P02769	52|53	105	52.5	2	3|19|4|7|65|0|56|28|2|15|9|12|13|322|15|29|8|16|26|31|33|10|10|3|2|11|21|8|16|0|0|0|0|0|0|0|0|0|0	0	0	0	0	0	-147.67	0.83	0.88
ZBTB6	P02769	P02769	24|34	58	29	2	3|19|4|7|65|0|56|28|2|15|9|12|13|322|15|29|8|16|26|31|33|10|10|3|2|11|21|8|16|0|0|0|0|0|0|0|0|0|0	0	0	0	0	0	-202.15	0.46	0.88
ZNF140	P02769	P02769	1|2	3	1.5	2	3|19|4|7|65|0|56|28|2|15|9|12|13|322|15|29|8|16|26|31|33|10|10|3|2|11|21|8|16|0|0|0|0|0|0|0|0|0|0	0	0	0	0	0	-275.14	0.02	0.88
ZNF708	P02769	P02769	13|1	14	7	2	3|19|4|7|65|0|56|28|2|15|9|12|13|322|15|29|8|16|26|31|33|10|10|3|2|11|21|8|16|0|0|0|0|0|0|0|0|0|0	0	0	0	0	0	-275.14	0.11	0.88
FEZF1	P02769	P02769	2|0	2	1	2	3|19|4|7|65|0|56|28|2|15|9|12|13|322|15|29|8|16|26|31|33|10|10|3|2|11|21|8|16|0|0|0|0|0|0|0|0|0|0	0	0	0	0	0	-280.69	0.02	0.88
MZF1	P02769	P02769	26|25	51	25.5	2	3|19|4|7|65|0|56|28|2|15|9|12|13|322|15|29|8|16|26|31|33|10|10|3|2|11|21|8|16|0|0|0|0|0|0|0|0|0|0	0	0	0	0	0	-199.8	0.4	0.88
ZBTB14	P02769	P02769	14|8	22	11	2	3|19|4|7|65|0|56|28|2|15|9|12|13|322|15|29|8|16|26|31|33|10|10|3|2|11|21|8|16|0|0|0|0|0|0|0|0|0|0	0	0	0	0	0	-246.9	0.17	0.88
ZBTB42	P02769	P02769	1|0	1	0.5	2	3|19|4|7|65|0|56|28|2|15|9|12|13|322|15|29|8|16|26|31|33|10|10|3|2|11|21|8|16|0|0|0|0|0|0|0|0|0|0	0	0	0	0	0	-280.69	0.01	0.88
KLF7	P02769	P02769	21|6	27	13.5	2	3|19|4|7|65|0|56|28|2|15|9|12|13|322|15|29|8|16|26|31|33|10|10|3|2|11|21|8|16|0|0|0|0|0|0|0|0|0|0	0	0	0	0	0	-253.98	0.21	0.88
ZNF669	P02769	P02769	8|0	8	4	2	3|19|4|7|65|0|56|28|2|15|9|12|13|322|15|29|8|16|26|31|33|10|10|3|2|11|21|8|16|0|0|0|0|0|0|0|0|0|0	0	0	0	0	0	-280.69	0.06	0.88
ZNF436	P02769	P02769	3|3	6	3	2	3|19|4|7|65|0|56|28|2|15|9|12|13|322|15|29|8|16|26|31|33|10|10|3|2|11|21|8|16|0|0|0|0|0|0|0|0|0|0	0	0	0	0	0	-265.84	0.05	0.88
ZNF768	P02769	P02769	67|0	67	33.5	2	3|19|4|7|65|0|56|28|2|15|9|12|13|322|15|29|8|16|26|31|33|10|10|3|2|11|21|8|16|0|0|0|0|0|0|0|0|0|0	0	0	0	0	0	-280.69	0.53	0.88
KLF1	P02769	P02769	26|4	30	15	2	3|19|4|7|65|0|56|28|2|15|9|12|13|322|15|29|8|16|26|31|33|10|10|3|2|11|21|8|16|0|0|0|0|0|0|0|0|0|0	0	0	0	0	0	-261.68	0.24	0.88
ZNF418	P02769	P02769	0|1	1	0.5	2	3|19|4|7|65|0|56|28|2|15|9|12|13|322|15|29|8|16|26|31|33|10|10|3|2|11|21|8|16|0|0|0|0|0|0|0|0|0|0	0	0	0	0	0	-280.69	0.01	0.88
ZNF513	P02769	P02769	0|2	2	1	2	3|19|4|7|65|0|56|28|2|15|9|12|13|322|15|29|8|16|26|31|33|10|10|3|2|11|21|8|16|0|0|0|0|0|0|0|0|0|0	0	0	0	0	0	-280.69	0.02	0.88
ZNF184	P02769	P02769	1|0	1	0.5	2	3|19|4|7|65|0|56|28|2|15|9|12|13|322|15|29|8|16|26|31|33|10|10|3|2|11|21|8|16|0|0|0|0|0|0|0|0|0|0	0	0	0	0	0	-280.69	0.01	0.88
ZIM3	P02769	P02769	0|339	339	169.5	2	3|19|4|7|65|0|56|28|2|15|9|12|13|322|15|29|8|16|26|31|33|10|10|3|2|11|21|8|16|0|0|0|0|0|0|0|0|0|0	0.45	0.9	0.45	0.9	0.45	-280.69	2.69	0.27
ZNF324	P02769	P02769	30|38	68	34	2	3|19|4|7|65|0|56|28|2|15|9|12|13|322|15|29|8|16|26|31|33|10|10|3|2|11|21|8|16|0|0|0|0|0|0|0|0|0|0	0	0	0	0	0	-188.63	0.54	0.88
ZFP28	P02769	P02769	1|0	1	0.5	2	3|19|4|7|65|0|56|28|2|15|9|12|13|322|15|29|8|16|26|31|33|10|10|3|2|11|21|8|16|0|0|0|0|0|0|0|0|0|0	0	0	0	0	0	-280.69	0.01	0.88
ZNF419	P02769	P02769	107|20	127	63.5	2	3|19|4|7|65|0|56|28|2|15|9|12|13|322|15|29|8|16|26|31|33|10|10|3|2|11|21|8|16|0|0|0|0|0|0|0|0|0|0	0	0	0	0	0	-211.95	1.01	0.88
ZNF320	P02769	P02769	9|4	13	6.5	2	3|19|4|7|65|0|56|28|2|15|9|12|13|322|15|29|8|16|26|31|33|10|10|3|2|11|21|8|16|0|0|0|0|0|0|0|0|0|0	0	0	0	0	0	-261.68	0.1	0.88
ZNF322	P02769	P02769	32|47	79	39.5	2	3|19|4|7|65|0|56|28|2|15|9|12|13|322|15|29|8|16|26|31|33|10|10|3|2|11|21|8|16|0|0|0|0|0|0|0|0|0|0	0	0	0	0	0	-184.39	0.63	0.88
ZNF329	P02769	P02769	2|0	2	1	2	3|19|4|7|65|0|56|28|2|15|9|12|13|322|15|29|8|16|26|31|33|10|10|3|2|11|21|8|16|0|0|0|0|0|0|0|0|0|0	0	0	0	0	0	-280.69	0.02	0.88
OSR2	P02769	P02769	7|8	15	7.5	2	3|19|4|7|65|0|56|28|2|15|9|12|13|322|15|29|8|16|26|31|33|10|10|3|2|11|21|8|16|0|0|0|0|0|0|0|0|0|0	0	0	0	0	0	-250.37	0.12	0.88
MYNN	P02769	P02769	15|18	33	16.5	2	3|19|4|7|65|0|56|28|2|15|9|12|13|322|15|29|8|16|26|31|33|10|10|3|2|11|21|8|16|0|0|0|0|0|0|0|0|0|0	0	0	0	0	0	-225.31	0.26	0.88
ZFP82	P02769	P02769	3|0	3	1.5	2	3|19|4|7|65|0|56|28|2|15|9|12|13|322|15|29|8|16|26|31|33|10|10|3|2|11|21|8|16|0|0|0|0|0|0|0|0|0|0	0	0	0	0	0	-280.69	0.02	0.88
PATZ1	P02769	P02769	4|35	39	19.5	2	3|19|4|7|65|0|56|28|2|15|9|12|13|322|15|29|8|16|26|31|33|10|10|3|2|11|21|8|16|0|0|0|0|0|0|0|0|0|0	0	0	0	0	0	-261.68	0.31	0.88
ZNF549	P02769	P02769	0|1	1	0.5	2	3|19|4|7|65|0|56|28|2|15|9|12|13|322|15|29|8|16|26|31|33|10|10|3|2|11|21|8|16|0|0|0|0|0|0|0|0|0|0	0	0	0	0	0	-280.69	0.01	0.88
ZNF610	P02769	P02769	1|1	2	1	2	3|19|4|7|65|0|56|28|2|15|9|12|13|322|15|29|8|16|26|31|33|10|10|3|2|11|21|8|16|0|0|0|0|0|0|0|0|0|0	0	0	0	0	0	-275.14	0.02	0.88
ZNF394	P02769	P02769	45|56	101	50.5	2	3|19|4|7|65|0|56|28|2|15|9|12|13|322|15|29|8|16|26|31|33|10|10|3|2|11|21|8|16|0|0|0|0|0|0|0|0|0|0	0	0	0	0	0	-159.5	0.8	0.88
MAZ	P02769	P02769	4|42	46	23	2	3|19|4|7|65|0|56|28|2|15|9|12|13|322|15|29|8|16|26|31|33|10|10|3|2|11|21|8|16|0|0|0|0|0|0|0|0|0|0	0	0	0	0	0	-261.68	0.37	0.88
ZNF449	P02769	P02769	16|0	16	8	2	3|19|4|7|65|0|56|28|2|15|9|12|13|322|15|29|8|16|26|31|33|10|10|3|2|11|21|8|16|0|0|0|0|0|0|0|0|0|0	0	0	0	0	0	-280.69	0.13	0.88
GTF3A	P02769	P02769	3|4	7	3.5	2	3|19|4|7|65|0|56|28|2|15|9|12|13|322|15|29|8|16|26|31|33|10|10|3|2|11|21|8|16|0|0|0|0|0|0|0|0|0|0	0	0	0	0	0	-265.84	0.06	0.88
ZNF547	P02769	P02769	9|0	9	4.5	2	3|19|4|7|65|0|56|28|2|15|9|12|13|322|15|29|8|16|26|31|33|10|10|3|2|11|21|8|16|0|0|0|0|0|0|0|0|0|0	0	0	0	0	0	-280.69	0.07	0.88
ZNF778	P02769	P02769	0|4	4	2	2	3|19|4|7|65|0|56|28|2|15|9|12|13|322|15|29|8|16|26|31|33|10|10|3|2|11|21|8|16|0|0|0|0|0|0|0|0|0|0	0	0	0	0	0	-280.69	0.03	0.88
ZNF596	P02769	P02769	14|34	48	24	2	3|19|4|7|65|0|56|28|2|15|9|12|13|322|15|29|8|16|26|31|33|10|10|3|2|11|21|8|16|0|0|0|0|0|0|0|0|0|0	0	0	0	0	0	-228.16	0.38	0.88
ZNF563	P02769	P02769	13|22	35	17.5	2	3|19|4|7|65|0|56|28|2|15|9|12|13|322|15|29|8|16|26|31|33|10|10|3|2|11|21|8|16|0|0|0|0|0|0|0|0|0|0	0	0	0	0	0	-231.07	0.28	0.88
ZNF770	P02769	P02769	0|2	2	1	2	3|19|4|7|65|0|56|28|2|15|9|12|13|322|15|29|8|16|26|31|33|10|10|3|2|11|21|8|16|0|0|0|0|0|0|0|0|0|0	0	0	0	0	0	-280.69	0.02	0.88
ZSCAN30	P02769	P02769	32|46	78	39	2	3|19|4|7|65|0|56|28|2|15|9|12|13|322|15|29|8|16|26|31|33|10|10|3|2|11|21|8|16|0|0|0|0|0|0|0|0|0|0	0	0	0	0	0	-184.39	0.62	0.88
ZNF184	P02768	ALB	0|1	1	0.5	2	0|0|0|0|0|0|0|0|0|0|0|0|0|0|0|0|0|0|2|0|0|0|0|0|0|0|0|0|0|19|11|27|5|27|8|19|27|0|0	0	0	0	0	0	-64.63	0.03	0.88
ZNF449	P02768	ALB	6|0	6	3	2	0|0|0|0|0|0|0|0|0|0|0|0|0|0|0|0|0|0|2|0|0|0|0|0|0|0|0|0|0|19|11|27|5|27|8|19|27|0|0	0	0	0	0	0	-64.63	0.21	0.87
ZFP3	P02768	ALB	2|0	2	1	2	0|0|0|0|0|0|0|0|0|0|0|0|0|0|0|0|0|0|2|0|0|0|0|0|0|0|0|0|0|19|11|27|5|27|8|19|27|0|0	0	0	0	0	0	-64.63	0.07	0.88
ZNF768	P02768	ALB	44|0	44	22	2	0|0|0|0|0|0|0|0|0|0|0|0|0|0|0|0|0|0|2|0|0|0|0|0|0|0|0|0|0|19|11|27|5|27|8|19|27|0|0	0	0.01	0	0.01	0	-64.63	1.52	0.67
PATZ1	P02768	ALB	0|5	5	2.5	2	0|0|0|0|0|0|0|0|0|0|0|0|0|0|0|0|0|0|2|0|0|0|0|0|0|0|0|0|0|19|11|27|5|27|8|19|27|0|0	0	0	0	0	0	-64.63	0.17	0.87
ZIM3	P02768	ALB	0|2	2	1	2	0|0|0|0|0|0|0|0|0|0|0|0|0|0|0|0|0|0|2|0|0|0|0|0|0|0|0|0|0|19|11|27|5|27|8|19|27|0|0	0	0	0	0	0	-64.63	0.07	0.88
ZNF140	P04259	KRT6B	0|1	1	0.5	2	0|0|0|0|0|0|0|0|0|0|12|0|2|0|0|0|0|0|0|4|0|0|0|0|0|0|0|0|0|26|30|41|20|41|6|27|30|14|8	0	0	0	0	0	-111.36	0.02	0.88
ZBTB6	P04259	KRT6B	0|13	13	6.5	2	0|0|0|0|0|0|0|0|0|0|12|0|2|0|0|0|0|0|0|4|0|0|0|0|0|0|0|0|0|26|30|41|20|41|6|27|30|14|8	0	0	0	0	0	-111.36	0.26	0.88
MZF1	P04259	KRT6B	0|1	1	0.5	2	0|0|0|0|0|0|0|0|0|0|12|0|2|0|0|0|0|0|0|4|0|0|0|0|0|0|0|0|0|26|30|41|20|41|6|27|30|14|8	0	0	0	0	0	-111.36	0.02	0.88
ZNF449	P04259	KRT6B	4|0	4	2	2	0|0|0|0|0|0|0|0|0|0|12|0|2|0|0|0|0|0|0|4|0|0|0|0|0|0|0|0|0|26|30|41|20|41|6|27|30|14|8	0	0	0	0	0	-111.36	0.08	0.88
OSR2	P04259	KRT6B	7|6	13	6.5	2	0|0|0|0|0|0|0|0|0|0|12|0|2|0|0|0|0|0|0|4|0|0|0|0|0|0|0|0|0|26|30|41|20|41|6|27|30|14|8	0	0	0	0	0	-90.2	0.26	0.88
ZFP3	P04259	KRT6B	7|0	7	3.5	2	0|0|0|0|0|0|0|0|0|0|12|0|2|0|0|0|0|0|0|4|0|0|0|0|0|0|0|0|0|26|30|41|20|41|6|27|30|14|8	0	0	0	0	0	-111.36	0.14	0.88
ZNF34	P04259	KRT6B	4|0	4	2	2	0|0|0|0|0|0|0|0|0|0|12|0|2|0|0|0|0|0|0|4|0|0|0|0|0|0|0|0|0|26|30|41|20|41|6|27|30|14|8	0	0	0	0	0	-111.36	0.08	0.88
SCRT1	P04259	KRT6B	5|5	10	5	2	0|0|0|0|0|0|0|0|0|0|12|0|2|0|0|0|0|0|0|4|0|0|0|0|0|0|0|0|0|26|30|41|20|41|6|27|30|14|8	0	0	0	0	0	-93.04	0.2	0.88
ZNF768	P04259	KRT6B	8|0	8	4	2	0|0|0|0|0|0|0|0|0|0|12|0|2|0|0|0|0|0|0|4|0|0|0|0|0|0|0|0|0|26|30|41|20|41|6|27|30|14|8	0	0	0	0	0	-111.36	0.16	0.88
ZNF419	P04259	KRT6B	1|3	4	2	2	0|0|0|0|0|0|0|0|0|0|12|0|2|0|0|0|0|0|0|4|0|0|0|0|0|0|0|0|0|26|30|41|20|41|6|27|30|14|8	0	0	0	0	0	-106.75	0.08	0.88
ZFP82	P04259	KRT6B	2|0	2	1	2	0|0|0|0|0|0|0|0|0|0|12|0|2|0|0|0|0|0|0|4|0|0|0|0|0|0|0|0|0|26|30|41|20|41|6|27|30|14|8	0	0	0	0	0	-111.36	0.04	0.88
ZNF596	P04259	KRT6B	3|2	5	2.5	2	0|0|0|0|0|0|0|0|0|0|12|0|2|0|0|0|0|0|0|4|0|0|0|0|0|0|0|0|0|26|30|41|20|41|6|27|30|14|8	0	0	0	0	0	-102.82	0.1	0.88
ZNF16	P04259	KRT6B	0|1	1	0.5	2	0|0|0|0|0|0|0|0|0|0|12|0|2|0|0|0|0|0|0|4|0|0|0|0|0|0|0|0|0|26|30|41|20|41|6|27|30|14|8	0	0	0	0	0	-111.36	0.02	0.88
ZSCAN30	P04259	KRT6B	9|0	9	4.5	2	0|0|0|0|0|0|0|0|0|0|12|0|2|0|0|0|0|0|0|4|0|0|0|0|0|0|0|0|0|26|30|41|20|41|6|27|30|14|8	0	0	0	0	0	-111.36	0.18	0.88
PRDM1	P04259	KRT6B	5|0	5	2.5	2	0|0|0|0|0|0|0|0|0|0|12|0|2|0|0|0|0|0|0|4|0|0|0|0|0|0|0|0|0|26|30|41|20|41|6|27|30|14|8	0	0	0	0	0	-111.36	0.1	0.88
ZNF331	P05386	RPLP1	2|0	2	1	2	0|0|0|0|0|0|0|0|0|0|0|0|0|0|0|0|0|0|3|0|2|0|0|0|1|0|0|4|0|2|1|1|2|1|2|1|1|1|0	0	0	0	0	0	-9.91	0.53	0.71
ZNF250	P05386	RPLP1	2|2	4	2	2	0|0|0|0|0|0|0|0|0|0|0|0|0|0|0|0|0|0|3|0|2|0|0|0|1|0|0|4|0|2|1|1|2|1|2|1|1|1|0	0	0	0	0	0	-6.34	1.05	0.69
GLIS1	P05386	RPLP1	1|0	1	0.5	2	0|0|0|0|0|0|0|0|0|0|0|0|0|0|0|0|0|0|3|0|2|0|0|0|1|0|0|4|0|2|1|1|2|1|2|1|1|1|0	0	0	0	0	0	-9.91	0.26	0.88
ZNF596	P05386	RPLP1	0|2	2	1	2	0|0|0|0|0|0|0|0|0|0|0|0|0|0|0|0|0|0|3|0|2|0|0|0|1|0|0|4|0|2|1|1|2|1|2|1|1|1|0	0	0	0	0	0	-9.91	0.53	0.71
ZNF594	P05386	RPLP1	3|0	3	1.5	2	0|0|0|0|0|0|0|0|0|0|0|0|0|0|0|0|0|0|3|0|2|0|0|0|1|0|0|4|0|2|1|1|2|1|2|1|1|1|0	0	0.01	0	0.01	0	-9.91	0.79	0.67
ZNF419	P05386	RPLP1	0|2	2	1	2	0|0|0|0|0|0|0|0|0|0|0|0|0|0|0|0|0|0|3|0|2|0|0|0|1|0|0|4|0|2|1|1|2|1|2|1|1|1|0	0	0	0	0	0	-9.91	0.53	0.71
ZNF71	P05386	RPLP1	2|2	4	2	2	0|0|0|0|0|0|0|0|0|0|0|0|0|0|0|0|0|0|3|0|2|0|0|0|1|0|0|4|0|2|1|1|2|1|2|1|1|1|0	0	0	0	0	0	-6.34	1.05	0.69
IKZF3	P05386	RPLP1	6|4	10	5	2	0|0|0|0|0|0|0|0|0|0|0|0|0|0|0|0|0|0|3|0|2|0|0|0|1|0|0|4|0|2|1|1|2|1|2|1|1|1|0	0.15	0.27	0.15	0.27	0.15	-3.53	2.63	0.46
ZNF708	P05386	RPLP1	4|3	7	3.5	2	0|0|0|0|0|0|0|0|0|0|0|0|0|0|0|0|0|0|3|0|2|0|0|0|1|0|0|4|0|2|1|1|2|1|2|1|1|1|0	0.02	0.03	0.02	0.03	0.02	-4.9	1.84	0.62
FEZF1	P05386	RPLP1	0|2	2	1	2	0|0|0|0|0|0|0|0|0|0|0|0|0|0|0|0|0|0|3|0|2|0|0|0|1|0|0|4|0|2|1|1|2|1|2|1|1|1|0	0	0	0	0	0	-9.91	0.53	0.71
ZBTB14	P05386	RPLP1	2|2	4	2	2	0|0|0|0|0|0|0|0|0|0|0|0|0|0|0|0|0|0|3|0|2|0|0|0|1|0|0|4|0|2|1|1|2|1|2|1|1|1|0	0	0	0	0	0	-6.34	1.05	0.69
ZNF8	P05386	RPLP1	2|0	2	1	2	0|0|0|0|0|0|0|0|0|0|0|0|0|0|0|0|0|0|3|0|2|0|0|0|1|0|0|4|0|2|1|1|2|1|2|1|1|1|0	0	0	0	0	0	-9.91	0.53	0.71
KLF7	P05386	RPLP1	2|2	4	2	2	0|0|0|0|0|0|0|0|0|0|0|0|0|0|0|0|0|0|3|0|2|0|0|0|1|0|0|4|0|2|1|1|2|1|2|1|1|1|0	0	0	0	0	0	-6.34	1.05	0.69
ZNF436	P05386	RPLP1	0|2	2	1	2	0|0|0|0|0|0|0|0|0|0|0|0|0|0|0|0|0|0|3|0|2|0|0|0|1|0|0|4|0|2|1|1|2|1|2|1|1|1|0	0	0	0	0	0	-9.91	0.53	0.71
ZSCAN5C	P05386	RPLP1	0|4	4	2	2	0|0|0|0|0|0|0|0|0|0|0|0|0|0|0|0|0|0|3|0|2|0|0|0|1|0|0|4|0|2|1|1|2|1|2|1|1|1|0	0.01	0.03	0.01	0.03	0.01	-9.91	1.05	0.63
KLF1	P05386	RPLP1	6|2	8	4	2	0|0|0|0|0|0|0|0|0|0|0|0|0|0|0|0|0|0|3|0|2|0|0|0|1|0|0|4|0|2|1|1|2|1|2|1|1|1|0	0.14	0.27	0.14	0.27	0.14	-6.34	2.11	0.47
ZNF513	P05386	RPLP1	0|1	1	0.5	2	0|0|0|0|0|0|0|0|0|0|0|0|0|0|0|0|0|0|3|0|2|0|0|0|1|0|0|4|0|2|1|1|2|1|2|1|1|1|0	0	0	0	0	0	-9.91	0.26	0.88
ZNF768	P05386	RPLP1	2|1	3	1.5	2	0|0|0|0|0|0|0|0|0|0|0|0|0|0|0|0|0|0|3|0|2|0|0|0|1|0|0|4|0|2|1|1|2|1|2|1|1|1|0	0	0	0	0	0	-7.87	0.79	0.71
ZNF320	P05386	RPLP1	2|1	3	1.5	2	0|0|0|0|0|0|0|0|0|0|0|0|0|0|0|0|0|0|3|0|2|0|0|0|1|0|0|4|0|2|1|1|2|1|2|1|1|1|0	0	0	0	0	0	-7.87	0.79	0.71
ZNF322	P05386	RPLP1	9|12	21	10.5	2	0|0|0|0|0|0|0|0|0|0|0|0|0|0|0|0|0|0|3|0|2|0|0|0|1|0|0|4|0|2|1|1|2|1|2|1|1|1|0	0.96	1	0.96	1	0.96	2.43	5.53	0.01
OSR2	P05386	RPLP1	0|2	2	1	2	0|0|0|0|0|0|0|0|0|0|0|0|0|0|0|0|0|0|3|0|2|0|0|0|1|0|0|4|0|2|1|1|2|1|2|1|1|1|0	0	0	0	0	0	-9.91	0.53	0.71
MYNN	P05386	RPLP1	2|1	3	1.5	2	0|0|0|0|0|0|0|0|0|0|0|0|0|0|0|0|0|0|3|0|2|0|0|0|1|0|0|4|0|2|1|1|2|1|2|1|1|1|0	0	0	0	0	0	-7.87	0.79	0.71
ZFP82	P05386	RPLP1	2|2	4	2	2	0|0|0|0|0|0|0|0|0|0|0|0|0|0|0|0|0|0|3|0|2|0|0|0|1|0|0|4|0|2|1|1|2|1|2|1|1|1|0	0	0	0	0	0	-6.34	1.05	0.69
PATZ1	P05386	RPLP1	1|3	4	2	2	0|0|0|0|0|0|0|0|0|0|0|0|0|0|0|0|0|0|3|0|2|0|0|0|1|0|0|4|0|2|1|1|2|1|2|1|1|1|0	0	0.01	0	0.01	0	-7.87	1.05	0.67
ZNF394	P05386	RPLP1	1|0	1	0.5	2	0|0|0|0|0|0|0|0|0|0|0|0|0|0|0|0|0|0|3|0|2|0|0|0|1|0|0|4|0|2|1|1|2|1|2|1|1|1|0	0	0	0	0	0	-9.91	0.26	0.88
MAZ	P05386	RPLP1	3|9	12	6	2	0|0|0|0|0|0|0|0|0|0|0|0|0|0|0|0|0|0|3|0|2|0|0|0|1|0|0|4|0|2|1|1|2|1|2|1|1|1|0	0.46	0.92	0.46	0.92	0.46	-4.9	3.16	0.23
GTF3A	P05386	RPLP1	1|1	2	1	2	0|0|0|0|0|0|0|0|0|0|0|0|0|0|0|0|0|0|3|0|2|0|0|0|1|0|0|4|0|2|1|1|2|1|2|1|1|1|0	0	0	0	0	0	-7.87	0.53	0.88
ZNF778	P05386	RPLP1	0|1	1	0.5	2	0|0|0|0|0|0|0|0|0|0|0|0|0|0|0|0|0|0|3|0|2|0|0|0|1|0|0|4|0|2|1|1|2|1|2|1|1|1|0	0	0	0	0	0	-9.91	0.26	0.88
SCRT1	P05386	RPLP1	0|2	2	1	2	0|0|0|0|0|0|0|0|0|0|0|0|0|0|0|0|0|0|3|0|2|0|0|0|1|0|0|4|0|2|1|1|2|1|2|1|1|1|0	0	0	0	0	0	-9.91	0.53	0.71
ZNF563	P05386	RPLP1	1|2	3	1.5	2	0|0|0|0|0|0|0|0|0|0|0|0|0|0|0|0|0|0|3|0|2|0|0|0|1|0|0|4|0|2|1|1|2|1|2|1|1|1|0	0	0	0	0	0	-7.87	0.79	0.71
ZNF770	P05386	RPLP1	1|1	2	1	2	0|0|0|0|0|0|0|0|0|0|0|0|0|0|0|0|0|0|3|0|2|0|0|0|1|0|0|4|0|2|1|1|2|1|2|1|1|1|0	0	0	0	0	0	-7.87	0.53	0.88
ZSCAN30	P05386	RPLP1	0|1	1	0.5	2	0|0|0|0|0|0|0|0|0|0|0|0|0|0|0|0|0|0|3|0|2|0|0|0|1|0|0|4|0|2|1|1|2|1|2|1|1|1|0	0	0	0	0	0	-9.91	0.26	0.88
ZNF214	P05387	RPLP2	2|1	3	1.5	2	3|6|0|2|3|0|0|4|2|0|1|0|0|3|5|2|0|0|6|6|7|4|6|4|5|6|7|8|0|2|7|0|3|0|1|0|0|7|4	0	0	0	0	0	-27.1	0.23	0.88
ZNF331	P05387	RPLP2	0|3	3	1.5	2	3|6|0|2|3|0|0|4|2|0|1|0|0|3|5|2|0|0|6|6|7|4|6|4|5|6|7|8|0|2|7|0|3|0|1|0|0|7|4	0	0	0	0	0	-30.39	0.23	0.85
ZNF250	P05387	RPLP2	4|6	10	5	2	3|6|0|2|3|0|0|4|2|0|1|0|0|3|5|2|0|0|6|6|7|4|6|4|5|6|7|8|0|2|7|0|3|0|1|0|0|7|4	0	0	0	0	0	-20.36	0.76	0.83
GLIS1	P05387	RPLP2	5|3	8	4	2	3|6|0|2|3|0|0|4|2|0|1|0|0|3|5|2|0|0|6|6|7|4|6|4|5|6|7|8|0|2|7|0|3|0|1|0|0|7|4	0	0	0	0	0	-22.29	0.61	0.84
ZNF34	P05387	RPLP2	1|2	3	1.5	2	3|6|0|2|3|0|0|4|2|0|1|0|0|3|5|2|0|0|6|6|7|4|6|4|5|6|7|8|0|2|7|0|3|0|1|0|0|7|4	0	0	0	0	0	-27.1	0.23	0.88
SCRT1	P05387	RPLP2	4|4	8	4	2	3|6|0|2|3|0|0|4|2|0|1|0|0|3|5|2|0|0|6|6|7|4|6|4|5|6|7|8|0|2|7|0|3|0|1|0|0|7|4	0	0	0	0	0	-20.36	0.61	0.84
ZNF594	P05387	RPLP2	8|0	8	4	2	3|6|0|2|3|0|0|4|2|0|1|0|0|3|5|2|0|0|6|6|7|4|6|4|5|6|7|8|0|2|7|0|3|0|1|0|0|7|4	0	0	0	0	0	-30.39	0.61	0.81
ZNF595	P05387	RPLP2	3|3	6	3	2	3|6|0|2|3|0|0|4|2|0|1|0|0|3|5|2|0|0|6|6|7|4|6|4|5|6|7|8|0|2|7|0|3|0|1|0|0|7|4	0	0	0	0	0	-22.29	0.45	0.85
ZNF16	P05387	RPLP2	4|3	7	3.5	2	3|6|0|2|3|0|0|4|2|0|1|0|0|3|5|2|0|0|6|6|7|4|6|4|5|6|7|8|0|2|7|0|3|0|1|0|0|7|4	0	0	0	0	0	-22.29	0.53	0.84
ZNF71	P05387	RPLP2	2|2	4	2	2	3|6|0|2|3|0|0|4|2|0|1|0|0|3|5|2|0|0|6|6|7|4|6|4|5|6|7|8|0|2|7|0|3|0|1|0|0|7|4	0	0	0	0	0	-24.49	0.3	0.88
ZNF816	P05387	RPLP2	2|3	5	2.5	2	3|6|0|2|3|0|0|4|2|0|1|0|0|3|5|2|0|0|6|6|7|4|6|4|5|6|7|8|0|2|7|0|3|0|1|0|0|7|4	0	0	0	0	0	-24.49	0.38	0.85
IKZF3	P05387	RPLP2	9|4	13	6.5	2	3|6|0|2|3|0|0|4|2|0|1|0|0|3|5|2|0|0|6|6|7|4|6|4|5|6|7|8|0|2|7|0|3|0|1|0|0|7|4	0	0	0	0	0	-20.36	0.98	0.8
ZBTB6	P05387	RPLP2	5|2	7	3.5	2	3|6|0|2|3|0|0|4|2|0|1|0|0|3|5|2|0|0|6|6|7|4|6|4|5|6|7|8|0|2|7|0|3|0|1|0|0|7|4	0	0	0	0	0	-24.49	0.53	0.84
ZNF140	P05387	RPLP2	3|3	6	3	2	3|6|0|2|3|0|0|4|2|0|1|0|0|3|5|2|0|0|6|6|7|4|6|4|5|6|7|8|0|2|7|0|3|0|1|0|0|7|4	0	0	0	0	0	-22.29	0.45	0.85
ZNF708	P05387	RPLP2	8|1	9	4.5	2	3|6|0|2|3|0|0|4|2|0|1|0|0|3|5|2|0|0|6|6|7|4|6|4|5|6|7|8|0|2|7|0|3|0|1|0|0|7|4	0	0	0	0	0	-27.1	0.68	0.81
FEZF1	P05387	RPLP2	2|1	3	1.5	2	3|6|0|2|3|0|0|4|2|0|1|0|0|3|5|2|0|0|6|6|7|4|6|4|5|6|7|8|0|2|7|0|3|0|1|0|0|7|4	0	0	0	0	0	-27.1	0.23	0.88
MZF1	P05387	RPLP2	1|0	1	0.5	2	3|6|0|2|3|0|0|4|2|0|1|0|0|3|5|2|0|0|6|6|7|4|6|4|5|6|7|8|0|2|7|0|3|0|1|0|0|7|4	0	0	0	0	0	-30.39	0.08	0.88
ZBTB14	P05387	RPLP2	3|4	7	3.5	2	3|6|0|2|3|0|0|4|2|0|1|0|0|3|5|2|0|0|6|6|7|4|6|4|5|6|7|8|0|2|7|0|3|0|1|0|0|7|4	0	0	0	0	0	-22.29	0.53	0.84
ZNF18	P05387	RPLP2	1|0	1	0.5	2	3|6|0|2|3|0|0|4|2|0|1|0|0|3|5|2|0|0|6|6|7|4|6|4|5|6|7|8|0|2|7|0|3|0|1|0|0|7|4	0	0	0	0	0	-30.39	0.08	0.88
ZNF547	P05387	RPLP2	1|0	1	0.5	2	3|6|0|2|3|0|0|4|2|0|1|0|0|3|5|2|0|0|6|6|7|4|6|4|5|6|7|8|0|2|7|0|3|0|1|0|0|7|4	0	0	0	0	0	-30.39	0.08	0.88
ZNF8	P05387	RPLP2	2|0	2	1	2	3|6|0|2|3|0|0|4|2|0|1|0|0|3|5|2|0|0|6|6|7|4|6|4|5|6|7|8|0|2|7|0|3|0|1|0|0|7|4	0	0	0	0	0	-30.39	0.15	0.88
KLF7	P05387	RPLP2	4|2	6	3	2	3|6|0|2|3|0|0|4|2|0|1|0|0|3|5|2|0|0|6|6|7|4|6|4|5|6|7|8|0|2|7|0|3|0|1|0|0|7|4	0	0	0	0	0	-24.49	0.45	0.84
ZNF436	P05387	RPLP2	6|2	8	4	2	3|6|0|2|3|0|0|4|2|0|1|0|0|3|5|2|0|0|6|6|7|4|6|4|5|6|7|8|0|2|7|0|3|0|1|0|0|7|4	0	0	0	0	0	-24.49	0.61	0.83
ZSCAN5C	P05387	RPLP2	2|3	5	2.5	2	3|6|0|2|3|0|0|4|2|0|1|0|0|3|5|2|0|0|6|6|7|4|6|4|5|6|7|8|0|2|7|0|3|0|1|0|0|7|4	0	0	0	0	0	-24.49	0.38	0.85
KLF1	P05387	RPLP2	7|5	12	6	2	3|6|0|2|3|0|0|4|2|0|1|0|0|3|5|2|0|0|6|6|7|4|6|4|5|6|7|8|0|2|7|0|3|0|1|0|0|7|4	0	0	0	0	0	-18.65	0.91	0.82
ZNF418	P05387	RPLP2	2|2	4	2	2	3|6|0|2|3|0|0|4|2|0|1|0|0|3|5|2|0|0|6|6|7|4|6|4|5|6|7|8|0|2|7|0|3|0|1|0|0|7|4	0	0	0	0	0	-24.49	0.3	0.88
ZNF513	P05387	RPLP2	4|4	8	4	2	3|6|0|2|3|0|0|4|2|0|1|0|0|3|5|2|0|0|6|6|7|4|6|4|5|6|7|8|0|2|7|0|3|0|1|0|0|7|4	0	0	0	0	0	-20.36	0.61	0.84
ZNF667	P05387	RPLP2	3|0	3	1.5	2	3|6|0|2|3|0|0|4|2|0|1|0|0|3|5|2|0|0|6|6|7|4|6|4|5|6|7|8|0|2|7|0|3|0|1|0|0|7|4	0	0	0	0	0	-30.39	0.23	0.85
ZNF184	P05387	RPLP2	3|3	6	3	2	3|6|0|2|3|0|0|4|2|0|1|0|0|3|5|2|0|0|6|6|7|4|6|4|5|6|7|8|0|2|7|0|3|0|1|0|0|7|4	0	0	0	0	0	-22.29	0.45	0.85
ZFP28	P05387	RPLP2	3|1	4	2	2	3|6|0|2|3|0|0|4|2|0|1|0|0|3|5|2|0|0|6|6|7|4|6|4|5|6|7|8|0|2|7|0|3|0|1|0|0|7|4	0	0	0	0	0	-27.1	0.3	0.85
ZNF320	P05387	RPLP2	4|0	4	2	2	3|6|0|2|3|0|0|4|2|0|1|0|0|3|5|2|0|0|6|6|7|4|6|4|5|6|7|8|0|2|7|0|3|0|1|0|0|7|4	0	0	0	0	0	-30.39	0.3	0.84
ZNF322	P05387	RPLP2	13|14	27	13.5	2	3|6|0|2|3|0|0|4|2|0|1|0|0|3|5|2|0|0|6|6|7|4|6|4|5|6|7|8|0|2|7|0|3|0|1|0|0|7|4	0	0	0	0	0	-7.33	2.05	0.7
ZNF189	P05387	RPLP2	2|2	4	2	2	3|6|0|2|3|0|0|4|2|0|1|0|0|3|5|2|0|0|6|6|7|4|6|4|5|6|7|8|0|2|7|0|3|0|1|0|0|7|4	0	0	0	0	0	-24.49	0.3	0.88
ZNF329	P05387	RPLP2	2|3	5	2.5	2	3|6|0|2|3|0|0|4|2|0|1|0|0|3|5|2|0|0|6|6|7|4|6|4|5|6|7|8|0|2|7|0|3|0|1|0|0|7|4	0	0	0	0	0	-24.49	0.38	0.85
OSR2	P05387	RPLP2	2|3	5	2.5	2	3|6|0|2|3|0|0|4|2|0|1|0|0|3|5|2|0|0|6|6|7|4|6|4|5|6|7|8|0|2|7|0|3|0|1|0|0|7|4	0	0	0	0	0	-24.49	0.38	0.85
ZNF768	P05387	RPLP2	0|2	2	1	2	3|6|0|2|3|0|0|4|2|0|1|0|0|3|5|2|0|0|6|6|7|4|6|4|5|6|7|8|0|2|7|0|3|0|1|0|0|7|4	0	0	0	0	0	-30.39	0.15	0.88
MYNN	P05387	RPLP2	4|4	8	4	2	3|6|0|2|3|0|0|4|2|0|1|0|0|3|5|2|0|0|6|6|7|4|6|4|5|6|7|8|0|2|7|0|3|0|1|0|0|7|4	0	0	0	0	0	-20.36	0.61	0.84
ZFP82	P05387	RPLP2	1|0	1	0.5	2	3|6|0|2|3|0|0|4|2|0|1|0|0|3|5|2|0|0|6|6|7|4|6|4|5|6|7|8|0|2|7|0|3|0|1|0|0|7|4	0	0	0	0	0	-30.39	0.08	0.88
PATZ1	P05387	RPLP2	2|6	8	4	2	3|6|0|2|3|0|0|4|2|0|1|0|0|3|5|2|0|0|6|6|7|4|6|4|5|6|7|8|0|2|7|0|3|0|1|0|0|7|4	0	0	0	0	0	-24.49	0.61	0.83
ZNF549	P05387	RPLP2	2|1	3	1.5	2	3|6|0|2|3|0|0|4|2|0|1|0|0|3|5|2|0|0|6|6|7|4|6|4|5|6|7|8|0|2|7|0|3|0|1|0|0|7|4	0	0	0	0	0	-27.1	0.23	0.88
ZNF610	P05387	RPLP2	2|3	5	2.5	2	3|6|0|2|3|0|0|4|2|0|1|0|0|3|5|2|0|0|6|6|7|4|6|4|5|6|7|8|0|2|7|0|3|0|1|0|0|7|4	0	0	0	0	0	-24.49	0.38	0.85
ZNF563	P05387	RPLP2	1|2	3	1.5	2	3|6|0|2|3|0|0|4|2|0|1|0|0|3|5|2|0|0|6|6|7|4|6|4|5|6|7|8|0|2|7|0|3|0|1|0|0|7|4	0	0	0	0	0	-27.1	0.23	0.88
MAZ	P05387	RPLP2	0|7	7	3.5	2	3|6|0|2|3|0|0|4|2|0|1|0|0|3|5|2|0|0|6|6|7|4|6|4|5|6|7|8|0|2|7|0|3|0|1|0|0|7|4	0	0	0	0	0	-30.39	0.53	0.82
ZNF280A	P05387	RPLP2	0|1	1	0.5	2	3|6|0|2|3|0|0|4|2|0|1|0|0|3|5|2|0|0|6|6|7|4|6|4|5|6|7|8|0|2|7|0|3|0|1|0|0|7|4	0	0	0	0	0	-30.39	0.08	0.88
GTF3A	P05387	RPLP2	2|2	4	2	2	3|6|0|2|3|0|0|4|2|0|1|0|0|3|5|2|0|0|6|6|7|4|6|4|5|6|7|8|0|2|7|0|3|0|1|0|0|7|4	0	0	0	0	0	-24.49	0.3	0.88
ZBTB42	P05387	RPLP2	2|2	4	2	2	3|6|0|2|3|0|0|4|2|0|1|0|0|3|5|2|0|0|6|6|7|4|6|4|5|6|7|8|0|2|7|0|3|0|1|0|0|7|4	0	0	0	0	0	-24.49	0.3	0.88
PRDM1	P05387	RPLP2	1|4	5	2.5	2	3|6|0|2|3|0|0|4|2|0|1|0|0|3|5|2|0|0|6|6|7|4|6|4|5|6|7|8|0|2|7|0|3|0|1|0|0|7|4	0	0	0	0	0	-27.1	0.38	0.84
ZNF778	P05387	RPLP2	3|6	9	4.5	2	3|6|0|2|3|0|0|4|2|0|1|0|0|3|5|2|0|0|6|6|7|4|6|4|5|6|7|8|0|2|7|0|3|0|1|0|0|7|4	0	0	0	0	0	-22.29	0.68	0.83
ZNF419	P05387	RPLP2	0|1	1	0.5	2	3|6|0|2|3|0|0|4|2|0|1|0|0|3|5|2|0|0|6|6|7|4|6|4|5|6|7|8|0|2|7|0|3|0|1|0|0|7|4	0	0	0	0	0	-30.39	0.08	0.88
ZNF394	P05387	RPLP2	5|3	8	4	2	3|6|0|2|3|0|0|4|2|0|1|0|0|3|5|2|0|0|6|6|7|4|6|4|5|6|7|8|0|2|7|0|3|0|1|0|0|7|4	0	0	0	0	0	-22.29	0.61	0.84
ZNF770	P05387	RPLP2	3|3	6	3	2	3|6|0|2|3|0|0|4|2|0|1|0|0|3|5|2|0|0|6|6|7|4|6|4|5|6|7|8|0|2|7|0|3|0|1|0|0|7|4	0	0	0	0	0	-22.29	0.45	0.85
ZSCAN30	P05387	RPLP2	5|7	12	6	2	3|6|0|2|3|0|0|4|2|0|1|0|0|3|5|2|0|0|6|6|7|4|6|4|5|6|7|8|0|2|7|0|3|0|1|0|0|7|4	0	0	0	0	0	-18.65	0.91	0.82
ZNF610	P78347	GTF2I	0|1	1	0.5	2	0|0|0|0|0|0|0|0|0|0|0|0|0|0|0|0|0|0|1|0|6|0|0|0|1|0|0|0|0|2|2|0|2|0|3|0|0|0|1	0	0	0	0	0	-9.44	0.28	0.88
IKZF3	P78347	GTF2I	1|1	2	1	2	0|0|0|0|0|0|0|0|0|0|0|0|0|0|0|0|0|0|1|0|6|0|0|0|1|0|0|0|0|2|2|0|2|0|3|0|0|0|1	0	0	0	0	0	-7.45	0.56	0.88
ZNF708	P78347	GTF2I	2|11	13	6.5	2	0|0|0|0|0|0|0|0|0|0|0|0|0|0|0|0|0|0|1|0|6|0|0|0|1|0|0|0|0|2|2|0|2|0|3|0|0|0|1	0.47	0.93	0.47	0.93	0.47	-5.82	3.61	0.22
FEZF1	P78347	GTF2I	3|1	4	2	2	0|0|0|0|0|0|0|0|0|0|0|0|0|0|0|0|0|0|1|0|6|0|0|0|1|0|0|0|0|2|2|0|2|0|3|0|0|0|1	0.01	0.01	0.01	0.01	0.01	-7.45	1.11	0.66
MAZ	P78347	GTF2I	1|4	5	2.5	2	0|0|0|0|0|0|0|0|0|0|0|0|0|0|0|0|0|0|1|0|6|0|0|0|1|0|0|0|0|2|2|0|2|0|3|0|0|0|1	0.02	0.04	0.02	0.04	0.02	-7.45	1.39	0.61
ZNF189	P78347	GTF2I	0|1	1	0.5	2	0|0|0|0|0|0|0|0|0|0|0|0|0|0|0|0|0|0|1|0|6|0|0|0|1|0|0|0|0|2|2|0|2|0|3|0|0|0|1	0	0	0	0	0	-9.44	0.28	0.88
ZBTB42	P78347	GTF2I	1|0	1	0.5	2	0|0|0|0|0|0|0|0|0|0|0|0|0|0|0|0|0|0|1|0|6|0|0|0|1|0|0|0|0|2|2|0|2|0|3|0|0|0|1	0	0	0	0	0	-9.44	0.28	0.88
OSR2	P78347	GTF2I	0|1	1	0.5	2	0|0|0|0|0|0|0|0|0|0|0|0|0|0|0|0|0|0|1|0|6|0|0|0|1|0|0|0|0|2|2|0|2|0|3|0|0|0|1	0	0	0	0	0	-9.44	0.28	0.88
ZFP3	P78347	GTF2I	28|10	38	19	2	0|0|0|0|0|0|0|0|0|0|0|0|0|0|0|0|0|0|1|0|6|0|0|0|1|0|0|0|0|2|2|0|2|0|3|0|0|0|1	0.94	1	0.94	1	0.94	1.92	10.56	0.01
ZNF34	P78347	GTF2I	0|1	1	0.5	2	0|0|0|0|0|0|0|0|0|0|0|0|0|0|0|0|0|0|1|0|6|0|0|0|1|0|0|0|0|2|2|0|2|0|3|0|0|0|1	0	0	0	0	0	-9.44	0.28	0.88
SCRT1	P78347	GTF2I	2|0	2	1	2	0|0|0|0|0|0|0|0|0|0|0|0|0|0|0|0|0|0|1|0|6|0|0|0|1|0|0|0|0|2|2|0|2|0|3|0|0|0|1	0	0	0	0	0	-9.44	0.56	0.7
ZNF768	P78347	GTF2I	14|16	30	15	2	0|0|0|0|0|0|0|0|0|0|0|0|0|0|0|0|0|0|1|0|6|0|0|0|1|0|0|0|0|2|2|0|2|0|3|0|0|0|1	0.99	1	0.99	1	0.99	4.77	8.33	0
ZNF513	P78347	GTF2I	0|1	1	0.5	2	0|0|0|0|0|0|0|0|0|0|0|0|0|0|0|0|0|0|1|0|6|0|0|0|1|0|0|0|0|2|2|0|2|0|3|0|0|0|1	0	0	0	0	0	-9.44	0.28	0.88
PATZ1	P78347	GTF2I	0|3	3	1.5	2	0|0|0|0|0|0|0|0|0|0|0|0|0|0|0|0|0|0|1|0|6|0|0|0|1|0|0|0|0|2|2|0|2|0|3|0|0|0|1	0.01	0.01	0.01	0.01	0.01	-9.44	0.83	0.66
ZNF16	P78347	GTF2I	2|1	3	1.5	2	0|0|0|0|0|0|0|0|0|0|0|0|0|0|0|0|0|0|1|0|6|0|0|0|1|0|0|0|0|2|2|0|2|0|3|0|0|0|1	0	0	0	0	0	-7.45	0.83	0.7
ZSCAN30	P78347	GTF2I	0|1	1	0.5	2	0|0|0|0|0|0|0|0|0|0|0|0|0|0|0|0|0|0|1|0|6|0|0|0|1|0|0|0|0|2|2|0|2|0|3|0|0|0|1	0	0	0	0	0	-9.44	0.28	0.88
ZNF667	P78347	GTF2I	1|0	1	0.5	2	0|0|0|0|0|0|0|0|0|0|0|0|0|0|0|0|0|0|1|0|6|0|0|0|1|0|0|0|0|2|2|0|2|0|3|0|0|0|1	0	0	0	0	0	-9.44	0.28	0.88
ZNF770	P78347	GTF2I	0|2	2	1	2	0|0|0|0|0|0|0|0|0|0|0|0|0|0|0|0|0|0|1|0|6|0|0|0|1|0|0|0|0|2|2|0|2|0|3|0|0|0|1	0	0	0	0	0	-9.44	0.56	0.7
ZNF320	P78347	GTF2I	1|0	1	0.5	2	0|0|0|0|0|0|0|0|0|0|0|0|0|0|0|0|0|0|1|0|6|0|0|0|1|0|0|0|0|2|2|0|2|0|3|0|0|0|1	0	0	0	0	0	-9.44	0.28	0.88
ZNF331	P05388	RPLP0	0|5	5	2.5	2	0|6|0|0|0|0|0|0|0|0|0|0|0|0|0|0|0|0|1|0|4|0|0|0|1|0|2|11|0|8|12|9|14|9|6|4|7|18|14	0	0	0	0	0	-49.01	0.23	0.87
ZNF250	P05388	RPLP0	0|2	2	1	2	0|6|0|0|0|0|0|0|0|0|0|0|0|0|0|0|0|0|1|0|4|0|0|0|1|0|2|11|0|8|12|9|14|9|6|4|7|18|14	0	0	0	0	0	-49.01	0.09	0.88
GLIS1	P05388	RPLP0	1|0	1	0.5	2	0|6|0|0|0|0|0|0|0|0|0|0|0|0|0|0|0|0|1|0|4|0|0|0|1|0|2|11|0|8|12|9|14|9|6|4|7|18|14	0	0	0	0	0	-49.01	0.05	0.88
ZSCAN5C	P05388	RPLP0	1|1	2	1	2	0|6|0|0|0|0|0|0|0|0|0|0|0|0|0|0|0|0|1|0|4|0|0|0|1|0|2|11|0|8|12|9|14|9|6|4|7|18|14	0	0	0	0	0	-45.23	0.09	0.88
ZNF596	P05388	RPLP0	0|2	2	1	2	0|6|0|0|0|0|0|0|0|0|0|0|0|0|0|0|0|0|1|0|4|0|0|0|1|0|2|11|0|8|12|9|14|9|6|4|7|18|14	0	0	0	0	0	-49.01	0.09	0.88
ZNF594	P05388	RPLP0	5|0	5	2.5	2	0|6|0|0|0|0|0|0|0|0|0|0|0|0|0|0|0|0|1|0|4|0|0|0|1|0|2|11|0|8|12|9|14|9|6|4|7|18|14	0	0	0	0	0	-49.01	0.23	0.87
ZNF595	P05388	RPLP0	1|0	1	0.5	2	0|6|0|0|0|0|0|0|0|0|0|0|0|0|0|0|0|0|1|0|4|0|0|0|1|0|2|11|0|8|12|9|14|9|6|4|7|18|14	0	0	0	0	0	-49.01	0.05	0.88
ZNF71	P05388	RPLP0	4|1	5	2.5	2	0|6|0|0|0|0|0|0|0|0|0|0|0|0|0|0|0|0|1|0|4|0|0|0|1|0|2|11|0|8|12|9|14|9|6|4|7|18|14	0	0	0	0	0	-45.23	0.23	0.87
IKZF3	P05388	RPLP0	8|5	13	6.5	2	0|6|0|0|0|0|0|0|0|0|0|0|0|0|0|0|0|0|1|0|4|0|0|0|1|0|2|11|0|8|12|9|14|9|6|4|7|18|14	0	0	0	0	0	-34.84	0.6	0.86
ZBTB6	P05388	RPLP0	2|2	4	2	2	0|6|0|0|0|0|0|0|0|0|0|0|0|0|0|0|0|0|1|0|4|0|0|0|1|0|2|11|0|8|12|9|14|9|6|4|7|18|14	0	0	0	0	0	-42.14	0.19	0.88
ZNF708	P05388	RPLP0	7|5	12	6	2	0|6|0|0|0|0|0|0|0|0|0|0|0|0|0|0|0|0|1|0|4|0|0|0|1|0|2|11|0|8|12|9|14|9|6|4|7|18|14	0	0	0	0	0	-34.84	0.56	0.86
ZNF8	P05388	RPLP0	1|0	1	0.5	2	0|6|0|0|0|0|0|0|0|0|0|0|0|0|0|0|0|0|1|0|4|0|0|0|1|0|2|11|0|8|12|9|14|9|6|4|7|18|14	0	0	0	0	0	-49.01	0.05	0.88
KLF7	P05388	RPLP0	7|4	11	5.5	2	0|6|0|0|0|0|0|0|0|0|0|0|0|0|0|0|0|0|1|0|4|0|0|0|1|0|2|11|0|8|12|9|14|9|6|4|7|18|14	0	0	0	0	0	-37.03	0.51	0.86
ZNF436	P05388	RPLP0	5|1	6	3	2	0|6|0|0|0|0|0|0|0|0|0|0|0|0|0|0|0|0|1|0|4|0|0|0|1|0|2|11|0|8|12|9|14|9|6|4|7|18|14	0	0	0	0	0	-45.23	0.28	0.87
ZNF768	P05388	RPLP0	0|3	3	1.5	2	0|6|0|0|0|0|0|0|0|0|0|0|0|0|0|0|0|0|1|0|4|0|0|0|1|0|2|11|0|8|12|9|14|9|6|4|7|18|14	0	0	0	0	0	-49.01	0.14	0.88
KLF1	P05388	RPLP0	9|0	9	4.5	2	0|6|0|0|0|0|0|0|0|0|0|0|0|0|0|0|0|0|1|0|4|0|0|0|1|0|2|11|0|8|12|9|14|9|6|4|7|18|14	0	0	0	0	0	-49.01	0.42	0.86
ZNF418	P05388	RPLP0	1|0	1	0.5	2	0|6|0|0|0|0|0|0|0|0|0|0|0|0|0|0|0|0|1|0|4|0|0|0|1|0|2|11|0|8|12|9|14|9|6|4|7|18|14	0	0	0	0	0	-49.01	0.05	0.88
ZNF667	P05388	RPLP0	1|0	1	0.5	2	0|6|0|0|0|0|0|0|0|0|0|0|0|0|0|0|0|0|1|0|4|0|0|0|1|0|2|11|0|8|12|9|14|9|6|4|7|18|14	0	0	0	0	0	-49.01	0.05	0.88
ZNF184	P05388	RPLP0	3|3	6	3	2	0|6|0|0|0|0|0|0|0|0|0|0|0|0|0|0|0|0|1|0|4|0|0|0|1|0|2|11|0|8|12|9|14|9|6|4|7|18|14	0	0	0	0	0	-39.44	0.28	0.88
ZFP28	P05388	RPLP0	0|1	1	0.5	2	0|6|0|0|0|0|0|0|0|0|0|0|0|0|0|0|0|0|1|0|4|0|0|0|1|0|2|11|0|8|12|9|14|9|6|4|7|18|14	0	0	0	0	0	-49.01	0.05	0.88
ZNF320	P05388	RPLP0	0|2	2	1	2	0|6|0|0|0|0|0|0|0|0|0|0|0|0|0|0|0|0|1|0|4|0|0|0|1|0|2|11|0|8|12|9|14|9|6|4|7|18|14	0	0	0	0	0	-49.01	0.09	0.88
ZNF322	P05388	RPLP0	14|13	27	13.5	2	0|6|0|0|0|0|0|0|0|0|0|0|0|0|0|0|0|0|1|0|4|0|0|0|1|0|2|11|0|8|12|9|14|9|6|4|7|18|14	0	0	0	0	0	-21.76	1.25	0.84
OSR2	P05388	RPLP0	5|4	9	4.5	2	0|6|0|0|0|0|0|0|0|0|0|0|0|0|0|0|0|0|1|0|4|0|0|0|1|0|2|11|0|8|12|9|14|9|6|4|7|18|14	0	0	0	0	0	-37.03	0.42	0.87
MYNN	P05388	RPLP0	2|6	8	4	2	0|6|0|0|0|0|0|0|0|0|0|0|0|0|0|0|0|0|1|0|4|0|0|0|1|0|2|11|0|8|12|9|14|9|6|4|7|18|14	0	0	0	0	0	-42.14	0.37	0.87
ZFP82	P05388	RPLP0	1|2	3	1.5	2	0|6|0|0|0|0|0|0|0|0|0|0|0|0|0|0|0|0|1|0|4|0|0|0|1|0|2|11|0|8|12|9|14|9|6|4|7|18|14	0	0	0	0	0	-45.23	0.14	0.88
PATZ1	P05388	RPLP0	0|8	8	4	2	0|6|0|0|0|0|0|0|0|0|0|0|0|0|0|0|0|0|1|0|4|0|0|0|1|0|2|11|0|8|12|9|14|9|6|4|7|18|14	0	0	0	0	0	-49.01	0.37	0.86
MAZ	P05388	RPLP0	1|7	8	4	2	0|6|0|0|0|0|0|0|0|0|0|0|0|0|0|0|0|0|1|0|4|0|0|0|1|0|2|11|0|8|12|9|14|9|6|4|7|18|14	0	0	0	0	0	-45.23	0.37	0.86
GTF3A	P05388	RPLP0	4|2	6	3	2	0|6|0|0|0|0|0|0|0|0|0|0|0|0|0|0|0|0|1|0|4|0|0|0|1|0|2|11|0|8|12|9|14|9|6|4|7|18|14	0	0	0	0	0	-42.14	0.28	0.87
PRDM1	P05388	RPLP0	0|1	1	0.5	2	0|6|0|0|0|0|0|0|0|0|0|0|0|0|0|0|0|0|1|0|4|0|0|0|1|0|2|11|0|8|12|9|14|9|6|4|7|18|14	0	0	0	0	0	-49.01	0.05	0.88
ZNF778	P05388	RPLP0	1|0	1	0.5	2	0|6|0|0|0|0|0|0|0|0|0|0|0|0|0|0|0|0|1|0|4|0|0|0|1|0|2|11|0|8|12|9|14|9|6|4|7|18|14	0	0	0	0	0	-49.01	0.05	0.88
SCRT1	P05388	RPLP0	5|0	5	2.5	2	0|6|0|0|0|0|0|0|0|0|0|0|0|0|0|0|0|0|1|0|4|0|0|0|1|0|2|11|0|8|12|9|14|9|6|4|7|18|14	0	0	0	0	0	-49.01	0.23	0.87
ZNF394	P05388	RPLP0	2|0	2	1	2	0|6|0|0|0|0|0|0|0|0|0|0|0|0|0|0|0|0|1|0|4|0|0|0|1|0|2|11|0|8|12|9|14|9|6|4|7|18|14	0	0	0	0	0	-49.01	0.09	0.88
ZSCAN30	P05388	RPLP0	7|6	13	6.5	2	0|6|0|0|0|0|0|0|0|0|0|0|0|0|0|0|0|0|1|0|4|0|0|0|1|0|2|11|0|8|12|9|14|9|6|4|7|18|14	0	0	0	0	0	-32.83	0.6	0.86
ZNF708	P62979	RPS27A	0|8	8	4	2	0|0|0|0|0|0|0|0|0|4|3|0|0|0|0|0|0|0|0|0|0|0|0|0|0|0|0|0|0|11|21|5|12|5|7|6|10|12|6	0	0	0	0	0	-42.9	0.42	0.85
ZBTB14	P62979	RPS27A	9|11	20	10	2	0|0|0|0|0|0|0|0|0|4|3|0|0|0|0|0|0|0|0|0|0|0|0|0|0|0|0|0|0|11|21|5|12|5|7|6|10|12|6	0	0	0	0	0	-22.64	1.05	0.84
ZNF250	P62979	RPS27A	0|6	6	3	2	0|0|0|0|0|0|0|0|0|4|3|0|0|0|0|0|0|0|0|0|0|0|0|0|0|0|0|0|0|11|21|5|12|5|7|6|10|12|6	0	0	0	0	0	-42.9	0.32	0.86
ZNF768	P62979	RPS27A	8|6	14	7	2	0|0|0|0|0|0|0|0|0|4|3|0|0|0|0|0|0|0|0|0|0|0|0|0|0|0|0|0|0|11|21|5|12|5|7|6|10|12|6	0	0	0	0	0	-27.48	0.74	0.85
ZFP82	P62979	RPS27A	0|8	8	4	2	0|0|0|0|0|0|0|0|0|4|3|0|0|0|0|0|0|0|0|0|0|0|0|0|0|0|0|0|0|11|21|5|12|5|7|6|10|12|6	0	0	0	0	0	-42.9	0.42	0.85
ZNF16	P62979	RPS27A	3|0	3	1.5	2	0|0|0|0|0|0|0|0|0|4|3|0|0|0|0|0|0|0|0|0|0|0|0|0|0|0|0|0|0|11|21|5|12|5|7|6|10|12|6	0	0	0	0	0	-42.9	0.16	0.87
IKZF3	P62979	RPS27A	0|7	7	3.5	2	0|0|0|0|0|0|0|0|0|4|3|0|0|0|0|0|0|0|0|0|0|0|0|0|0|0|0|0|0|11|21|5|12|5|7|6|10|12|6	0	0	0	0	0	-42.9	0.37	0.86
ZNF667	P62979	RPS27A	5|0	5	2.5	2	0|0|0|0|0|0|0|0|0|4|3|0|0|0|0|0|0|0|0|0|0|0|0|0|0|0|0|0|0|11|21|5|12|5|7|6|10|12|6	0	0	0	0	0	-42.9	0.26	0.86
ZNF394	P02765	AHSG	1|1	2	1	2	0|2|0|0|0|0|0|0|0|0|0|0|0|0|0|0|0|0|0|0|0|0|0|0|0|0|1|0|0|0|0|0|0|0|0|0|0|0|0	0	0	0	0	0	-1.94	3.33	0.88
ZNF594	P02765	AHSG	2|0	2	1	2	0|2|0|0|0|0|0|0|0|0|0|0|0|0|0|0|0|0|0|0|0|0|0|0|0|0|1|0|0|0|0|0|0|0|0|0|0|0|0	0.18	0.36	0.18	0.36	0.18	-3.74	3.33	0.44
KLF1	P02765	AHSG	2|0	2	1	2	0|2|0|0|0|0|0|0|0|0|0|0|0|0|0|0|0|0|0|0|0|0|0|0|0|0|1|0|0|0|0|0|0|0|0|0|0|0|0	0.18	0.36	0.18	0.36	0.18	-3.74	3.33	0.44
ZNF322	P02765	AHSG	2|2	4	2	2	0|2|0|0|0|0|0|0|0|0|0|0|0|0|0|0|0|0|0|0|0|0|0|0|0|0|1|0|0|0|0|0|0|0|0|0|0|0|0	0.36	0.36	0.36	0.36	0.36	-0.58	6.67	0.35
ZNF778	Q2M218	ZNF630	1|0	1	0.5	2	0|0|0|0|0|0|0|0|0|0|0|0|0|0|0|0|0|0|0|0|0|0|0|0|0|0|0|0|0|0|0|0|0|0|0|0|0|0|0	0	0	0	0	0	-3	5	0.88
ZNF331	Q2M218	ZNF630	2|3	5	2.5	2	0|0|0|0|0|0|0|0|0|0|0|0|0|0|0|0|0|0|0|0|0|0|0|0|0|0|0|0|0|0|0|0|0|0|0|0|0|0|0	0.9	0.97	0.9	0.97	0.9	1.54	25	0.03
ZNF708	O76021	RSL1D1	0|1	1	0.5	2	0|0|0|0|0|0|0|0|0|0|0|0|0|0|0|0|0|0|0|0|0|0|0|0|0|0|0|5|0|2|0|1|19|1|0|0|0|3|2	0	0	0	0	0	-14.9	0.15	0.88
FEZF1	O76021	RSL1D1	1|0	1	0.5	2	0|0|0|0|0|0|0|0|0|0|0|0|0|0|0|0|0|0|0|0|0|0|0|0|0|0|0|5|0|2|0|1|19|1|0|0|0|3|2	0	0	0	0	0	-14.9	0.15	0.88
ZNF419	O76021	RSL1D1	1|0	1	0.5	2	0|0|0|0|0|0|0|0|0|0|0|0|0|0|0|0|0|0|0|0|0|0|0|0|0|0|0|5|0|2|0|1|19|1|0|0|0|3|2	0	0	0	0	0	-14.9	0.15	0.88
ZBTB14	O76021	RSL1D1	3|0	3	1.5	2	0|0|0|0|0|0|0|0|0|0|0|0|0|0|0|0|0|0|0|0|0|0|0|0|0|0|0|5|0|2|0|1|19|1|0|0|0|3|2	0	0	0	0	0	-14.9	0.45	0.76
ZNF329	O76021	RSL1D1	0|1	1	0.5	2	0|0|0|0|0|0|0|0|0|0|0|0|0|0|0|0|0|0|0|0|0|0|0|0|0|0|0|5|0|2|0|1|19|1|0|0|0|3|2	0	0	0	0	0	-14.9	0.15	0.88
KLF7	O76021	RSL1D1	0|1	1	0.5	2	0|0|0|0|0|0|0|0|0|0|0|0|0|0|0|0|0|0|0|0|0|0|0|0|0|0|0|5|0|2|0|1|19|1|0|0|0|3|2	0	0	0	0	0	-14.9	0.15	0.88
ZNF436	O76021	RSL1D1	0|4	4	2	2	0|0|0|0|0|0|0|0|0|0|0|0|0|0|0|0|0|0|0|0|0|0|0|0|0|0|0|5|0|2|0|1|19|1|0|0|0|3|2	0	0	0	0	0	-14.9	0.61	0.73
ZNF596	O76021	RSL1D1	2|0	2	1	2	0|0|0|0|0|0|0|0|0|0|0|0|0|0|0|0|0|0|0|0|0|0|0|0|0|0|0|5|0|2|0|1|19|1|0|0|0|3|2	0	0	0	0	0	-14.9	0.3	0.78
ZNF768	O76021	RSL1D1	3|5	8	4	2	0|0|0|0|0|0|0|0|0|0|0|0|0|0|0|0|0|0|0|0|0|0|0|0|0|0|0|5|0|2|0|1|19|1|0|0|0|3|2	0	0	0	0	0	-8.86	1.21	0.7
KLF1	O76021	RSL1D1	0|2	2	1	2	0|0|0|0|0|0|0|0|0|0|0|0|0|0|0|0|0|0|0|0|0|0|0|0|0|0|0|5|0|2|0|1|19|1|0|0|0|3|2	0	0	0	0	0	-14.9	0.3	0.78
ZFP82	O76021	RSL1D1	1|4	5	2.5	2	0|0|0|0|0|0|0|0|0|0|0|0|0|0|0|0|0|0|0|0|0|0|0|0|0|0|0|5|0|2|0|1|19|1|0|0|0|3|2	0	0	0	0	0	-12.3	0.76	0.73
PATZ1	O76021	RSL1D1	0|3	3	1.5	2	0|0|0|0|0|0|0|0|0|0|0|0|0|0|0|0|0|0|0|0|0|0|0|0|0|0|0|5|0|2|0|1|19|1|0|0|0|3|2	0	0	0	0	0	-14.9	0.45	0.76
ZNF16	O76021	RSL1D1	1|0	1	0.5	2	0|0|0|0|0|0|0|0|0|0|0|0|0|0|0|0|0|0|0|0|0|0|0|0|0|0|0|5|0|2|0|1|19|1|0|0|0|3|2	0	0	0	0	0	-14.9	0.15	0.88
ZNF71	O76021	RSL1D1	3|4	7	3.5	2	0|0|0|0|0|0|0|0|0|0|0|0|0|0|0|0|0|0|0|0|0|0|0|0|0|0|0|5|0|2|0|1|19|1|0|0|0|3|2	0	0	0	0	0	-8.86	1.06	0.73
ZNF667	O76021	RSL1D1	0|1	1	0.5	2	0|0|0|0|0|0|0|0|0|0|0|0|0|0|0|0|0|0|0|0|0|0|0|0|0|0|0|5|0|2|0|1|19|1|0|0|0|3|2	0	0	0	0	0	-14.9	0.15	0.88
PRDM1	O76021	RSL1D1	0|5	5	2.5	2	0|0|0|0|0|0|0|0|0|0|0|0|0|0|0|0|0|0|0|0|0|0|0|0|0|0|0|5|0|2|0|1|19|1|0|0|0|3|2	0	0	0	0	0	-14.9	0.76	0.7
ZNF214	P52272	HNRNPM	7|5	12	6	2	5|17|5|0|0|0|0|2|2|0|0|0|0|1|5|8|2|0|10|8|11|2|5|9|8|7|11|26|0|57|52|10|57|10|19|7|14|17|7	0	0	0	0	0	-106.28	0.21	0.88
ZNF490	P52272	HNRNPM	3|3	6	3	2	5|17|5|0|0|0|0|2|2|0|0|0|0|1|5|8|2|0|10|8|11|2|5|9|8|7|11|26|0|57|52|10|57|10|19|7|14|17|7	0	0	0	0	0	-112.77	0.11	0.88
ZNF331	P52272	HNRNPM	6|6	12	6	2	5|17|5|0|0|0|0|2|2|0|0|0|0|1|5|8|2|0|10|8|11|2|5|9|8|7|11|26|0|57|52|10|57|10|19|7|14|17|7	0	0	0	0	0	-103.32	0.21	0.88
ZNF250	P52272	HNRNPM	19|19	38	19	2	5|17|5|0|0|0|0|2|2|0|0|0|0|1|5|8|2|0|10|8|11|2|5|9|8|7|11|26|0|57|52|10|57|10|19|7|14|17|7	0	0	0	0	0	-74.22	0.68	0.88
GLIS1	P52272	HNRNPM	13|16	29	14.5	2	5|17|5|0|0|0|0|2|2|0|0|0|0|1|5|8|2|0|10|8|11|2|5|9|8|7|11|26|0|57|52|10|57|10|19|7|14|17|7	0	0	0	0	0	-86.02	0.52	0.88
ZNF595	P52272	HNRNPM	3|4	7	3.5	2	5|17|5|0|0|0|0|2|2|0|0|0|0|1|5|8|2|0|10|8|11|2|5|9|8|7|11|26|0|57|52|10|57|10|19|7|14|17|7	0	0	0	0	0	-112.77	0.12	0.88
ZNF257	P52272	HNRNPM	5|8	13	6.5	2	5|17|5|0|0|0|0|2|2|0|0|0|0|1|5|8|2|0|10|8|11|2|5|9|8|7|11|26|0|57|52|10|57|10|19|7|14|17|7	0	0	0	0	0	-106.28	0.23	0.88
ZSCAN5C	P52272	HNRNPM	17|16	33	16.5	2	5|17|5|0|0|0|0|2|2|0|0|0|0|1|5|8|2|0|10|8|11|2|5|9|8|7|11|26|0|57|52|10|57|10|19|7|14|17|7	0	0	0	0	0	-79.85	0.59	0.88
ZNF596	P52272	HNRNPM	12|16	28	14	2	5|17|5|0|0|0|0|2|2|0|0|0|0|1|5|8|2|0|10|8|11|2|5|9|8|7|11|26|0|57|52|10|57|10|19|7|14|17|7	0	0	0	0	0	-88.21	0.5	0.88
ZNF594	P52272	HNRNPM	19|8	27	13.5	2	5|17|5|0|0|0|0|2|2|0|0|0|0|1|5|8|2|0|10|8|11|2|5|9|8|7|11|26|0|57|52|10|57|10|19|7|14|17|7	0	0	0	0	0	-97.85	0.48	0.88
ZNF419	P52272	HNRNPM	16|12	28	14	2	5|17|5|0|0|0|0|2|2|0|0|0|0|1|5|8|2|0|10|8|11|2|5|9|8|7|11|26|0|57|52|10|57|10|19|7|14|17|7	0	0	0	0	0	-88.21	0.5	0.88
ZNF16	P52272	HNRNPM	5|4	9	4.5	2	5|17|5|0|0|0|0|2|2|0|0|0|0|1|5|8|2|0|10|8|11|2|5|9|8|7|11|26|0|57|52|10|57|10|19|7|14|17|7	0	0	0	0	0	-109.42	0.16	0.88
ZNF71	P52272	HNRNPM	15|19	34	17	2	5|17|5|0|0|0|0|2|2|0|0|0|0|1|5|8|2|0|10|8|11|2|5|9|8|7|11|26|0|57|52|10|57|10|19|7|14|17|7	0	0	0	0	0	-81.84	0.6	0.88
ZNF816	P52272	HNRNPM	19|16	35	17.5	2	5|17|5|0|0|0|0|2|2|0|0|0|0|1|5|8|2|0|10|8|11|2|5|9|8|7|11|26|0|57|52|10|57|10|19|7|14|17|7	0	0	0	0	0	-79.85	0.62	0.88
IKZF3	P52272	HNRNPM	17|28	45	22.5	2	5|17|5|0|0|0|0|2|2|0|0|0|0|1|5|8|2|0|10|8|11|2|5|9|8|7|11|26|0|57|52|10|57|10|19|7|14|17|7	0	0	0	0	0	-77.92	0.8	0.88
ZBTB6	P52272	HNRNPM	6|4	10	5	2	5|17|5|0|0|0|0|2|2|0|0|0|0|1|5|8|2|0|10|8|11|2|5|9|8|7|11|26|0|57|52|10|57|10|19|7|14|17|7	0	0	0	0	0	-109.42	0.18	0.88
ZNF140	P52272	HNRNPM	7|2	9	4.5	2	5|17|5|0|0|0|0|2|2|0|0|0|0|1|5|8|2|0|10|8|11|2|5|9|8|7|11|26|0|57|52|10|57|10|19|7|14|17|7	0	0	0	0	0	-116.42	0.16	0.88
ZNF708	P52272	HNRNPM	19|19	38	19	2	5|17|5|0|0|0|0|2|2|0|0|0|0|1|5|8|2|0|10|8|11|2|5|9|8|7|11|26|0|57|52|10|57|10|19|7|14|17|7	0	0	0	0	0	-74.22	0.68	0.88
FEZF1	P52272	HNRNPM	20|17	37	18.5	2	5|17|5|0|0|0|0|2|2|0|0|0|0|1|5|8|2|0|10|8|11|2|5|9|8|7|11|26|0|57|52|10|57|10|19|7|14|17|7	0	0	0	0	0	-77.92	0.66	0.88
MZF1	P52272	HNRNPM	13|13	26	13	2	5|17|5|0|0|0|0|2|2|0|0|0|0|1|5|8|2|0|10|8|11|2|5|9|8|7|11|26|0|57|52|10|57|10|19|7|14|17|7	0	0	0	0	0	-86.02	0.46	0.88
ZBTB14	P52272	HNRNPM	7|6	13	6.5	2	5|17|5|0|0|0|0|2|2|0|0|0|0|1|5|8|2|0|10|8|11|2|5|9|8|7|11|26|0|57|52|10|57|10|19|7|14|17|7	0	0	0	0	0	-103.32	0.23	0.88
ZNF18	P52272	HNRNPM	5|7	12	6	2	5|17|5|0|0|0|0|2|2|0|0|0|0|1|5|8|2|0|10|8|11|2|5|9|8|7|11|26|0|57|52|10|57|10|19|7|14|17|7	0	0	0	0	0	-106.28	0.21	0.88
ZBTB42	P52272	HNRNPM	3|4	7	3.5	2	5|17|5|0|0|0|0|2|2|0|0|0|0|1|5|8|2|0|10|8|11|2|5|9|8|7|11|26|0|57|52|10|57|10|19|7|14|17|7	0	0	0	0	0	-112.77	0.12	0.88
ZNF8	P52272	HNRNPM	8|7	15	7.5	2	5|17|5|0|0|0|0|2|2|0|0|0|0|1|5|8|2|0|10|8|11|2|5|9|8|7|11|26|0|57|52|10|57|10|19|7|14|17|7	0	0	0	0	0	-100.52	0.27	0.88
ZFP3	P52272	HNRNPM	7|7	14	7	2	5|17|5|0|0|0|0|2|2|0|0|0|0|1|5|8|2|0|10|8|11|2|5|9|8|7|11|26|0|57|52|10|57|10|19|7|14|17|7	0	0	0	0	0	-100.52	0.25	0.88
KLF7	P52272	HNRNPM	18|24	42	21	2	5|17|5|0|0|0|0|2|2|0|0|0|0|1|5|8|2|0|10|8|11|2|5|9|8|7|11|26|0|57|52|10|57|10|19|7|14|17|7	0	0	0	0	0	-76.04	0.75	0.88
ZNF669	P52272	HNRNPM	4|9	13	6.5	2	5|17|5|0|0|0|0|2|2|0|0|0|0|1|5|8|2|0|10|8|11|2|5|9|8|7|11|26|0|57|52|10|57|10|19|7|14|17|7	0	0	0	0	0	-109.42	0.23	0.88
ZNF436	P52272	HNRNPM	26|18	44	22	2	5|17|5|0|0|0|0|2|2|0|0|0|0|1|5|8|2|0|10|8|11|2|5|9|8|7|11|26|0|57|52|10|57|10|19|7|14|17|7	0	0	0	0	0	-76.04	0.78	0.88
ZNF768	P52272	HNRNPM	17|19	36	18	2	5|17|5|0|0|0|0|2|2|0|0|0|0|1|5|8|2|0|10|8|11|2|5|9|8|7|11|26|0|57|52|10|57|10|19|7|14|17|7	0	0	0	0	0	-77.92	0.64	0.88
KLF1	P52272	HNRNPM	27|20	47	23.5	2	5|17|5|0|0|0|0|2|2|0|0|0|0|1|5|8|2|0|10|8|11|2|5|9|8|7|11|26|0|57|52|10|57|10|19|7|14|17|7	0	0	0	0	0	-72.45	0.84	0.88
ZNF418	P52272	HNRNPM	4|3	7	3.5	2	5|17|5|0|0|0|0|2|2|0|0|0|0|1|5|8|2|0|10|8|11|2|5|9|8|7|11|26|0|57|52|10|57|10|19|7|14|17|7	0	0	0	0	0	-112.77	0.12	0.88
ZNF513	P52272	HNRNPM	15|14	29	14.5	2	5|17|5|0|0|0|0|2|2|0|0|0|0|1|5|8|2|0|10|8|11|2|5|9|8|7|11|26|0|57|52|10|57|10|19|7|14|17|7	0	0	0	0	0	-83.9	0.52	0.88
ZNF667	P52272	HNRNPM	9|8	17	8.5	2	5|17|5|0|0|0|0|2|2|0|0|0|0|1|5|8|2|0|10|8|11|2|5|9|8|7|11|26|0|57|52|10|57|10|19|7|14|17|7	0	0	0	0	0	-97.85	0.3	0.88
ZNF184	P52272	HNRNPM	4|3	7	3.5	2	5|17|5|0|0|0|0|2|2|0|0|0|0|1|5|8|2|0|10|8|11|2|5|9|8|7|11|26|0|57|52|10|57|10|19|7|14|17|7	0	0	0	0	0	-112.77	0.12	0.88
ZFP28	P52272	HNRNPM	14|20	34	17	2	5|17|5|0|0|0|0|2|2|0|0|0|0|1|5|8|2|0|10|8|11|2|5|9|8|7|11|26|0|57|52|10|57|10|19|7|14|17|7	0	0	0	0	0	-83.9	0.6	0.88
ZNF320	P52272	HNRNPM	19|20	39	19.5	2	5|17|5|0|0|0|0|2|2|0|0|0|0|1|5|8|2|0|10|8|11|2|5|9|8|7|11|26|0|57|52|10|57|10|19|7|14|17|7	0	0	0	0	0	-74.22	0.69	0.88
ZNF322	P52272	HNRNPM	10|12	22	11	2	5|17|5|0|0|0|0|2|2|0|0|0|0|1|5|8|2|0|10|8|11|2|5|9|8|7|11|26|0|57|52|10|57|10|19|7|14|17|7	0	0	0	0	0	-92.84	0.39	0.88
ZNF189	P52272	HNRNPM	6|5	11	5.5	2	5|17|5|0|0|0|0|2|2|0|0|0|0|1|5|8|2|0|10|8|11|2|5|9|8|7|11|26|0|57|52|10|57|10|19|7|14|17|7	0	0	0	0	0	-106.28	0.2	0.88
ZNF34	P52272	HNRNPM	5|7	12	6	2	5|17|5|0|0|0|0|2|2|0|0|0|0|1|5|8|2|0|10|8|11|2|5|9|8|7|11|26|0|57|52|10|57|10|19|7|14|17|7	0	0	0	0	0	-106.28	0.21	0.88
ZNF329	P52272	HNRNPM	9|12	21	10.5	2	5|17|5|0|0|0|0|2|2|0|0|0|0|1|5|8|2|0|10|8|11|2|5|9|8|7|11|26|0|57|52|10|57|10|19|7|14|17|7	0	0	0	0	0	-95.29	0.37	0.88
OSR2	P52272	HNRNPM	27|27	54	27	2	5|17|5|0|0|0|0|2|2|0|0|0|0|1|5|8|2|0|10|8|11|2|5|9|8|7|11|26|0|57|52|10|57|10|19|7|14|17|7	0	0	0	0	0	-61.24	0.96	0.88
ZIM3	P52272	HNRNPM	2|6	8	4	2	5|17|5|0|0|0|0|2|2|0|0|0|0|1|5|8|2|0|10|8|11|2|5|9|8|7|11|26|0|57|52|10|57|10|19|7|14|17|7	0	0	0	0	0	-116.42	0.14	0.88
ZNF582	P52272	HNRNPM	16|15	31	15.5	2	5|17|5|0|0|0|0|2|2|0|0|0|0|1|5|8|2|0|10|8|11|2|5|9|8|7|11|26|0|57|52|10|57|10|19|7|14|17|7	0	0	0	0	0	-81.84	0.55	0.88
MYNN	P52272	HNRNPM	14|12	26	13	2	5|17|5|0|0|0|0|2|2|0|0|0|0|1|5|8|2|0|10|8|11|2|5|9|8|7|11|26|0|57|52|10|57|10|19|7|14|17|7	0	0	0	0	0	-88.21	0.46	0.88
ZFP82	P52272	HNRNPM	16|20	36	18	2	5|17|5|0|0|0|0|2|2|0|0|0|0|1|5|8|2|0|10|8|11|2|5|9|8|7|11|26|0|57|52|10|57|10|19|7|14|17|7	0	0	0	0	0	-79.85	0.64	0.88
PATZ1	P52272	HNRNPM	16|23	39	19.5	2	5|17|5|0|0|0|0|2|2|0|0|0|0|1|5|8|2|0|10|8|11|2|5|9|8|7|11|26|0|57|52|10|57|10|19|7|14|17|7	0	0	0	0	0	-79.85	0.69	0.88
ZNF394	P52272	HNRNPM	5|1	6	3	2	5|17|5|0|0|0|0|2|2|0|0|0|0|1|5|8|2|0|10|8|11|2|5|9|8|7|11|26|0|57|52|10|57|10|19|7|14|17|7	0	0	0	0	0	-120.47	0.11	0.88
ZNF610	P52272	HNRNPM	26|21	47	23.5	2	5|17|5|0|0|0|0|2|2|0|0|0|0|1|5|8|2|0|10|8|11|2|5|9|8|7|11|26|0|57|52|10|57|10|19|7|14|17|7	0	0	0	0	0	-70.72	0.84	0.88
ZNF502	P52272	HNRNPM	7|7	14	7	2	5|17|5|0|0|0|0|2|2|0|0|0|0|1|5|8|2|0|10|8|11|2|5|9|8|7|11|26|0|57|52|10|57|10|19|7|14|17|7	0	0	0	0	0	-100.52	0.25	0.88
ZNF692	P52272	HNRNPM	2|4	6	3	2	5|17|5|0|0|0|0|2|2|0|0|0|0|1|5|8|2|0|10|8|11|2|5|9|8|7|11|26|0|57|52|10|57|10|19|7|14|17|7	0	0	0	0	0	-116.42	0.11	0.88
ZNF324	P52272	HNRNPM	3|4	7	3.5	2	5|17|5|0|0|0|0|2|2|0|0|0|0|1|5|8|2|0|10|8|11|2|5|9|8|7|11|26|0|57|52|10|57|10|19|7|14|17|7	0	0	0	0	0	-112.77	0.12	0.88
ZNF549	P52272	HNRNPM	5|4	9	4.5	2	5|17|5|0|0|0|0|2|2|0|0|0|0|1|5|8|2|0|10|8|11|2|5|9|8|7|11|26|0|57|52|10|57|10|19|7|14|17|7	0	0	0	0	0	-109.42	0.16	0.88
MAZ	P52272	HNRNPM	21|35	56	28	2	5|17|5|0|0|0|0|2|2|0|0|0|0|1|5|8|2|0|10|8|11|2|5|9|8|7|11|26|0|57|52|10|57|10|19|7|14|17|7	0	0	0	0	0	-70.72	1	0.87
ZNF449	P52272	HNRNPM	11|6	17	8.5	2	5|17|5|0|0|0|0|2|2|0|0|0|0|1|5|8|2|0|10|8|11|2|5|9|8|7|11|26|0|57|52|10|57|10|19|7|14|17|7	0	0	0	0	0	-103.32	0.3	0.88
ZNF280A	P52272	HNRNPM	20|15	35	17.5	2	5|17|5|0|0|0|0|2|2|0|0|0|0|1|5|8|2|0|10|8|11|2|5|9|8|7|11|26|0|57|52|10|57|10|19|7|14|17|7	0	0	0	0	0	-81.84	0.62	0.88
GTF3A	P52272	HNRNPM	16|16	32	16	2	5|17|5|0|0|0|0|2|2|0|0|0|0|1|5|8|2|0|10|8|11|2|5|9|8|7|11|26|0|57|52|10|57|10|19|7|14|17|7	0	0	0	0	0	-79.85	0.57	0.88
ZNF547	P52272	HNRNPM	17|11	28	14	2	5|17|5|0|0|0|0|2|2|0|0|0|0|1|5|8|2|0|10|8|11|2|5|9|8|7|11|26|0|57|52|10|57|10|19|7|14|17|7	0	0	0	0	0	-90.48	0.5	0.88
PRDM1	P52272	HNRNPM	8|23	31	15.5	2	5|17|5|0|0|0|0|2|2|0|0|0|0|1|5|8|2|0|10|8|11|2|5|9|8|7|11|26|0|57|52|10|57|10|19|7|14|17|7	0	0	0	0	0	-97.85	0.55	0.88
ZNF778	P52272	HNRNPM	16|18	34	17	2	5|17|5|0|0|0|0|2|2|0|0|0|0|1|5|8|2|0|10|8|11|2|5|9|8|7|11|26|0|57|52|10|57|10|19|7|14|17|7	0	0	0	0	0	-79.85	0.6	0.88
SCRT1	P52272	HNRNPM	8|7	15	7.5	2	5|17|5|0|0|0|0|2|2|0|0|0|0|1|5|8|2|0|10|8|11|2|5|9|8|7|11|26|0|57|52|10|57|10|19|7|14|17|7	0	0	0	0	0	-100.52	0.27	0.88
ZNF37A	P52272	HNRNPM	17|21	38	19	2	5|17|5|0|0|0|0|2|2|0|0|0|0|1|5|8|2|0|10|8|11|2|5|9|8|7|11|26|0|57|52|10|57|10|19|7|14|17|7	0	0	0	0	0	-77.92	0.68	0.88
ZNF563	P52272	HNRNPM	13|15	28	14	2	5|17|5|0|0|0|0|2|2|0|0|0|0|1|5|8|2|0|10|8|11|2|5|9|8|7|11|26|0|57|52|10|57|10|19|7|14|17|7	0	0	0	0	0	-86.02	0.5	0.88
ZNF770	P52272	HNRNPM	16|9	25	12.5	2	5|17|5|0|0|0|0|2|2|0|0|0|0|1|5|8|2|0|10|8|11|2|5|9|8|7|11|26|0|57|52|10|57|10|19|7|14|17|7	0	0	0	0	0	-95.29	0.44	0.88
ZSCAN30	P52272	HNRNPM	29|25	54	27	2	5|17|5|0|0|0|0|2|2|0|0|0|0|1|5|8|2|0|10|8|11|2|5|9|8|7|11|26|0|57|52|10|57|10|19|7|14|17|7	0	0	0	0	0	-64.24	0.96	0.88
KLF7	Q96T60	PNKP	0|1	1	0.5	2	0|0|0|0|0|0|0|0|0|0|0|0|0|0|0|0|0|0|0|0|0|0|0|0|0|0|0|0|0|0|0|0|0|0|0|0|0|0|0	0	0	0	0	0	-3	5	0.88
SCRT1	Q96T60	PNKP	1|0	1	0.5	2	0|0|0|0|0|0|0|0|0|0|0|0|0|0|0|0|0|0|0|0|0|0|0|0|0|0|0|0|0|0|0|0|0|0|0|0|0|0|0	0	0	0	0	0	-3	5	0.88
ZNF708	Q96T60	PNKP	0|2	2	1	2	0|0|0|0|0|0|0|0|0|0|0|0|0|0|0|0|0|0|0|0|0|0|0|0|0|0|0|0|0|0|0|0|0|0|0|0|0|0|0	0.41	0.82	0.41	0.82	0.41	-3	10	0.28
GLIS1	Q96T60	PNKP	1|0	1	0.5	2	0|0|0|0|0|0|0|0|0|0|0|0|0|0|0|0|0|0|0|0|0|0|0|0|0|0|0|0|0|0|0|0|0|0|0|0|0|0|0	0	0	0	0	0	-3	5	0.88
ZNF324	P01700	P01700	1|1	2	1	2	0|0|2|0|0|2|2|0|0|2|3|0|0|0|0|0|1|0|2|0|2|0|0|0|0|3|0|0|0|0|0|0|0|0|0|0|0|0|0	0	0	0	0	0	-7.87	0.53	0.88
ZBTB6	P01700	P01700	1|1	2	1	2	0|0|2|0|0|2|2|0|0|2|3|0|0|0|0|0|1|0|2|0|2|0|0|0|0|3|0|0|0|0|0|0|0|0|0|0|0|0|0	0	0	0	0	0	-7.87	0.53	0.88
ZNF331	P01700	P01700	0|2	2	1	2	0|0|2|0|0|2|2|0|0|2|3|0|0|0|0|0|1|0|2|0|2|0|0|0|0|3|0|0|0|0|0|0|0|0|0|0|0|0|0	0	0	0	0	0	-9.91	0.53	0.71
ZNF692	P01700	P01700	0|1	1	0.5	2	0|0|2|0|0|2|2|0|0|2|3|0|0|0|0|0|1|0|2|0|2|0|0|0|0|3|0|0|0|0|0|0|0|0|0|0|0|0|0	0	0	0	0	0	-9.91	0.26	0.88
OSR2	P01700	P01700	0|1	1	0.5	2	0|0|2|0|0|2|2|0|0|2|3|0|0|0|0|0|1|0|2|0|2|0|0|0|0|3|0|0|0|0|0|0|0|0|0|0|0|0|0	0	0	0	0	0	-9.91	0.26	0.88
ZNF34	P01700	P01700	0|1	1	0.5	2	0|0|2|0|0|2|2|0|0|2|3|0|0|0|0|0|1|0|2|0|2|0|0|0|0|3|0|0|0|0|0|0|0|0|0|0|0|0|0	0	0	0	0	0	-9.91	0.26	0.88
ZNF18	P01700	P01700	2|0	2	1	2	0|0|2|0|0|2|2|0|0|2|3|0|0|0|0|0|1|0|2|0|2|0|0|0|0|3|0|0|0|0|0|0|0|0|0|0|0|0|0	0	0	0	0	0	-9.91	0.53	0.71
ZNF490	P01700	P01700	1|0	1	0.5	2	0|0|2|0|0|2|2|0|0|2|3|0|0|0|0|0|1|0|2|0|2|0|0|0|0|3|0|0|0|0|0|0|0|0|0|0|0|0|0	0	0	0	0	0	-9.91	0.26	0.88
ZNF563	P01700	P01700	2|1	3	1.5	2	0|0|2|0|0|2|2|0|0|2|3|0|0|0|0|0|1|0|2|0|2|0|0|0|0|3|0|0|0|0|0|0|0|0|0|0|0|0|0	0	0	0	0	0	-7.87	0.79	0.71
ZNF34	Q08188	TGM3	10|0	10	5	2	0|0|0|0|0|0|0|0|0|1|0|0|0|0|0|0|0|0|0|0|0|0|0|0|0|0|0|0|0|0|1|3|1|3|0|0|3|0|0	0.49	0.99	0.49	0.99	0.49	-6.87	4.17	0.19
ZNF610	Q15369	TCEB1	3|4	7	3.5	2	0|1|0|0|0|0|0|0|0|0|0|0|0|0|0|0|0|0|0|0|0|0|0|0|0|0|0|0|0|1|2|0|1|0|0|0|0|0|0	0.62	0.78	0.62	0.78	0.62	-0.16	7	0.09
MAZ	Q15369	TCEB1	1|0	1	0.5	2	0|1|0|0|0|0|0|0|0|0|0|0|0|0|0|0|0|0|0|0|0|0|0|0|0|0|0|0|0|1|2|0|1|0|0|0|0|0|0	0	0	0	0	0	-4.44	1	0.88
ZNF322	Q15369	TCEB1	0|1	1	0.5	2	0|1|0|0|0|0|0|0|0|0|0|0|0|0|0|0|0|0|0|0|0|0|0|0|0|0|0|0|0|1|2|0|1|0|0|0|0|0|0	0	0	0	0	0	-4.44	1	0.88
ZNF331	Q15369	TCEB1	0|1	1	0.5	2	0|1|0|0|0|0|0|0|0|0|0|0|0|0|0|0|0|0|0|0|0|0|0|0|0|0|0|0|0|1|2|0|1|0|0|0|0|0|0	0	0	0	0	0	-4.44	1	0.88
ZNF596	Q15369	TCEB1	0|1	1	0.5	2	0|1|0|0|0|0|0|0|0|0|0|0|0|0|0|0|0|0|0|0|0|0|0|0|0|0|0|0|0|1|2|0|1|0|0|0|0|0|0	0	0	0	0	0	-4.44	1	0.88
ZNF419	Q15369	TCEB1	1|0	1	0.5	2	0|1|0|0|0|0|0|0|0|0|0|0|0|0|0|0|0|0|0|0|0|0|0|0|0|0|0|0|0|1|2|0|1|0|0|0|0|0|0	0	0	0	0	0	-4.44	1	0.88
ZNF513	Q15369	TCEB1	0|1	1	0.5	2	0|1|0|0|0|0|0|0|0|0|0|0|0|0|0|0|0|0|0|0|0|0|0|0|0|0|0|0|0|1|2|0|1|0|0|0|0|0|0	0	0	0	0	0	-4.44	1	0.88
ZNF16	Q15369	TCEB1	1|0	1	0.5	2	0|1|0|0|0|0|0|0|0|0|0|0|0|0|0|0|0|0|0|0|0|0|0|0|0|0|0|0|0|1|2|0|1|0|0|0|0|0|0	0	0	0	0	0	-4.44	1	0.88
IKZF3	Q15369	TCEB1	1|0	1	0.5	2	0|1|0|0|0|0|0|0|0|0|0|0|0|0|0|0|0|0|0|0|0|0|0|0|0|0|0|0|0|1|2|0|1|0|0|0|0|0|0	0	0	0	0	0	-4.44	1	0.88
ZSCAN30	Q15369	TCEB1	0|1	1	0.5	2	0|1|0|0|0|0|0|0|0|0|0|0|0|0|0|0|0|0|0|0|0|0|0|0|0|0|0|0|0|1|2|0|1|0|0|0|0|0|0	0	0	0	0	0	-4.44	1	0.88
ZNF214	Q15366	PCBP2	1|0	1	0.5	2	2|15|0|0|0|6|0|7|5|0|0|0|0|5|6|8|4|0|10|8|16|3|7|4|3|13|11|13|0|10|18|4|15|4|7|4|7|3|1	0	0	0	0	0	-58.39	0.04	0.88
ZNF490	Q15366	PCBP2	4|6	10	5	2	2|15|0|0|0|6|0|7|5|0|0|0|0|5|6|8|4|0|10|8|16|3|7|4|3|13|11|13|0|10|18|4|15|4|7|4|7|3|1	0	0	0	0	0	-45.7	0.39	0.87
ZNF331	Q15366	PCBP2	6|11	17	8.5	2	2|15|0|0|0|6|0|7|5|0|0|0|0|5|6|8|4|0|10|8|16|3|7|4|3|13|11|13|0|10|18|4|15|4|7|4|7|3|1	0	0	0	0	0	-41.15	0.66	0.86
ZNF250	Q15366	PCBP2	8|8	16	8	2	2|15|0|0|0|6|0|7|5|0|0|0|0|5|6|8|4|0|10|8|16|3|7|4|3|13|11|13|0|10|18|4|15|4|7|4|7|3|1	0	0	0	0	0	-37.21	0.62	0.87
GLIS1	Q15366	PCBP2	18|11	29	14.5	2	2|15|0|0|0|6|0|7|5|0|0|0|0|5|6|8|4|0|10|8|16|3|7|4|3|13|11|13|0|10|18|4|15|4|7|4|7|3|1	0	0	0	0	0	-32.13	1.12	0.85
ZNF595	Q15366	PCBP2	0|3	3	1.5	2	2|15|0|0|0|6|0|7|5|0|0|0|0|5|6|8|4|0|10|8|16|3|7|4|3|13|11|13|0|10|18|4|15|4|7|4|7|3|1	0	0	0	0	0	-58.39	0.12	0.88
ZNF257	Q15366	PCBP2	4|4	8	4	2	2|15|0|0|0|6|0|7|5|0|0|0|0|5|6|8|4|0|10|8|16|3|7|4|3|13|11|13|0|10|18|4|15|4|7|4|7|3|1	0	0	0	0	0	-45.7	0.31	0.88
ZNF34	Q15366	PCBP2	4|7	11	5.5	2	2|15|0|0|0|6|0|7|5|0|0|0|0|5|6|8|4|0|10|8|16|3|7|4|3|13|11|13|0|10|18|4|15|4|7|4|7|3|1	0	0	0	0	0	-45.7	0.43	0.87
ZFP28	Q15366	PCBP2	4|1	5	2.5	2	2|15|0|0|0|6|0|7|5|0|0|0|0|5|6|8|4|0|10|8|16|3|7|4|3|13|11|13|0|10|18|4|15|4|7|4|7|3|1	0	0	0	0	0	-54.43	0.19	0.88
ZNF596	Q15366	PCBP2	4|12	16	8	2	2|15|0|0|0|6|0|7|5|0|0|0|0|5|6|8|4|0|10|8|16|3|7|4|3|13|11|13|0|10|18|4|15|4|7|4|7|3|1	0	0	0	0	0	-45.7	0.62	0.86
ZNF667	Q15366	PCBP2	4|0	4	2	2	2|15|0|0|0|6|0|7|5|0|0|0|0|5|6|8|4|0|10|8|16|3|7|4|3|13|11|13|0|10|18|4|15|4|7|4|7|3|1	0	0	0	0	0	-58.39	0.16	0.88
ZNF594	Q15366	PCBP2	15|9	24	12	2	2|15|0|0|0|6|0|7|5|0|0|0|0|5|6|8|4|0|10|8|16|3|7|4|3|13|11|13|0|10|18|4|15|4|7|4|7|3|1	0	0	0	0	0	-35.42	0.93	0.86
ZNF419	Q15366	PCBP2	22|17	39	19.5	2	2|15|0|0|0|6|0|7|5|0|0|0|0|5|6|8|4|0|10|8|16|3|7|4|3|13|11|13|0|10|18|4|15|4|7|4|7|3|1	0	0	0	0	0	-23.44	1.51	0.83
ZNF16	Q15366	PCBP2	1|4	5	2.5	2	2|15|0|0|0|6|0|7|5|0|0|0|0|5|6|8|4|0|10|8|16|3|7|4|3|13|11|13|0|10|18|4|15|4|7|4|7|3|1	0	0	0	0	0	-54.43	0.19	0.88
ZNF71	Q15366	PCBP2	9|7	16	8	2	2|15|0|0|0|6|0|7|5|0|0|0|0|5|6|8|4|0|10|8|16|3|7|4|3|13|11|13|0|10|18|4|15|4|7|4|7|3|1	0	0	0	0	0	-39.12	0.62	0.87
ZNF816	Q15366	PCBP2	3|4	7	3.5	2	2|15|0|0|0|6|0|7|5|0|0|0|0|5|6|8|4|0|10|8|16|3|7|4|3|13|11|13|0|10|18|4|15|4|7|4|7|3|1	0	0	0	0	0	-48.29	0.27	0.88
IKZF3	Q15366	PCBP2	22|17	39	19.5	2	2|15|0|0|0|6|0|7|5|0|0|0|0|5|6|8|4|0|10|8|16|3|7|4|3|13|11|13|0|10|18|4|15|4|7|4|7|3|1	0	0	0	0	0	-23.44	1.51	0.83
ZBTB6	Q15366	PCBP2	6|5	11	5.5	2	2|15|0|0|0|6|0|7|5|0|0|0|0|5|6|8|4|0|10|8|16|3|7|4|3|13|11|13|0|10|18|4|15|4|7|4|7|3|1	0	0	0	0	0	-43.34	0.43	0.87
ZNF140	Q15366	PCBP2	2|2	4	2	2	2|15|0|0|0|6|0|7|5|0|0|0|0|5|6|8|4|0|10|8|16|3|7|4|3|13|11|13|0|10|18|4|15|4|7|4|7|3|1	0	0	0	0	0	-51.16	0.16	0.88
ZNF708	Q15366	PCBP2	14|12	26	13	2	2|15|0|0|0|6|0|7|5|0|0|0|0|5|6|8|4|0|10|8|16|3|7|4|3|13|11|13|0|10|18|4|15|4|7|4|7|3|1	0	0	0	0	0	-30.62	1.01	0.86
FEZF1	Q15366	PCBP2	15|11	26	13	2	2|15|0|0|0|6|0|7|5|0|0|0|0|5|6|8|4|0|10|8|16|3|7|4|3|13|11|13|0|10|18|4|15|4|7|4|7|3|1	0	0	0	0	0	-32.13	1.01	0.86
MZF1	Q15366	PCBP2	5|7	12	6	2	2|15|0|0|0|6|0|7|5|0|0|0|0|5|6|8|4|0|10|8|16|3|7|4|3|13|11|13|0|10|18|4|15|4|7|4|7|3|1	0	0	0	0	0	-43.34	0.47	0.87
ZBTB14	Q15366	PCBP2	16|17	33	16.5	2	2|15|0|0|0|6|0|7|5|0|0|0|0|5|6|8|4|0|10|8|16|3|7|4|3|13|11|13|0|10|18|4|15|4|7|4|7|3|1	0	0	0	0	0	-24.85	1.28	0.85
ZNF18	Q15366	PCBP2	6|6	12	6	2	2|15|0|0|0|6|0|7|5|0|0|0|0|5|6|8|4|0|10|8|16|3|7|4|3|13|11|13|0|10|18|4|15|4|7|4|7|3|1	0	0	0	0	0	-41.15	0.47	0.87
ZBTB42	Q15366	PCBP2	5|4	9	4.5	2	2|15|0|0|0|6|0|7|5|0|0|0|0|5|6|8|4|0|10|8|16|3|7|4|3|13|11|13|0|10|18|4|15|4|7|4|7|3|1	0	0	0	0	0	-45.7	0.35	0.88
ZNF8	Q15366	PCBP2	16|21	37	18.5	2	2|15|0|0|0|6|0|7|5|0|0|0|0|5|6|8|4|0|10|8|16|3|7|4|3|13|11|13|0|10|18|4|15|4|7|4|7|3|1	0	0	0	0	0	-24.85	1.43	0.83
ZFP3	Q15366	PCBP2	6|6	12	6	2	2|15|0|0|0|6|0|7|5|0|0|0|0|5|6|8|4|0|10|8|16|3|7|4|3|13|11|13|0|10|18|4|15|4|7|4|7|3|1	0	0	0	0	0	-41.15	0.47	0.87
KLF7	Q15366	PCBP2	11|16	27	13.5	2	2|15|0|0|0|6|0|7|5|0|0|0|0|5|6|8|4|0|10|8|16|3|7|4|3|13|11|13|0|10|18|4|15|4|7|4|7|3|1	0	0	0	0	0	-32.13	1.05	0.85
ZNF669	Q15366	PCBP2	0|8	8	4	2	2|15|0|0|0|6|0|7|5|0|0|0|0|5|6|8|4|0|10|8|16|3|7|4|3|13|11|13|0|10|18|4|15|4|7|4|7|3|1	0	0	0	0	0	-58.39	0.31	0.87
ZNF436	Q15366	PCBP2	19|12	31	15.5	2	2|15|0|0|0|6|0|7|5|0|0|0|0|5|6|8|4|0|10|8|16|3|7|4|3|13|11|13|0|10|18|4|15|4|7|4|7|3|1	0	0	0	0	0	-30.62	1.2	0.84
ZNF768	Q15366	PCBP2	10|9	19	9.5	2	2|15|0|0|0|6|0|7|5|0|0|0|0|5|6|8|4|0|10|8|16|3|7|4|3|13|11|13|0|10|18|4|15|4|7|4|7|3|1	0	0	0	0	0	-35.42	0.74	0.87
KLF1	Q15366	PCBP2	14|18	32	16	2	2|15|0|0|0|6|0|7|5|0|0|0|0|5|6|8|4|0|10|8|16|3|7|4|3|13|11|13|0|10|18|4|15|4|7|4|7|3|1	0	0	0	0	0	-27.71	1.24	0.85
ZSCAN5C	Q15366	PCBP2	5|5	10	5	2	2|15|0|0|0|6|0|7|5|0|0|0|0|5|6|8|4|0|10|8|16|3|7|4|3|13|11|13|0|10|18|4|15|4|7|4|7|3|1	0	0	0	0	0	-43.34	0.39	0.88
ZNF513	Q15366	PCBP2	3|3	6	3	2	2|15|0|0|0|6|0|7|5|0|0|0|0|5|6|8|4|0|10|8|16|3|7|4|3|13|11|13|0|10|18|4|15|4|7|4|7|3|1	0	0	0	0	0	-48.29	0.23	0.88
ZIM3	Q15366	PCBP2	5|7	12	6	2	2|15|0|0|0|6|0|7|5|0|0|0|0|5|6|8|4|0|10|8|16|3|7|4|3|13|11|13|0|10|18|4|15|4|7|4|7|3|1	0	0	0	0	0	-43.34	0.47	0.87
ZNF324	Q15366	PCBP2	2|0	2	1	2	2|15|0|0|0|6|0|7|5|0|0|0|0|5|6|8|4|0|10|8|16|3|7|4|3|13|11|13|0|10|18|4|15|4|7|4|7|3|1	0	0	0	0	0	-58.39	0.08	0.88
ZNF692	Q15366	PCBP2	7|8	15	7.5	2	2|15|0|0|0|6|0|7|5|0|0|0|0|5|6|8|4|0|10|8|16|3|7|4|3|13|11|13|0|10|18|4|15|4|7|4|7|3|1	0	0	0	0	0	-39.12	0.58	0.87
ZNF320	Q15366	PCBP2	15|9	24	12	2	2|15|0|0|0|6|0|7|5|0|0|0|0|5|6|8|4|0|10|8|16|3|7|4|3|13|11|13|0|10|18|4|15|4|7|4|7|3|1	0	0	0	0	0	-35.42	0.93	0.86
ZNF322	Q15366	PCBP2	8|10	18	9	2	2|15|0|0|0|6|0|7|5|0|0|0|0|5|6|8|4|0|10|8|16|3|7|4|3|13|11|13|0|10|18|4|15|4|7|4|7|3|1	0	0	0	0	0	-37.21	0.7	0.87
ZNF189	Q15366	PCBP2	3|3	6	3	2	2|15|0|0|0|6|0|7|5|0|0|0|0|5|6|8|4|0|10|8|16|3|7|4|3|13|11|13|0|10|18|4|15|4|7|4|7|3|1	0	0	0	0	0	-48.29	0.23	0.88
ZNF418	Q15366	PCBP2	1|2	3	1.5	2	2|15|0|0|0|6|0|7|5|0|0|0|0|5|6|8|4|0|10|8|16|3|7|4|3|13|11|13|0|10|18|4|15|4|7|4|7|3|1	0	0	0	0	0	-54.43	0.12	0.88
ZNF329	Q15366	PCBP2	3|4	7	3.5	2	2|15|0|0|0|6|0|7|5|0|0|0|0|5|6|8|4|0|10|8|16|3|7|4|3|13|11|13|0|10|18|4|15|4|7|4|7|3|1	0	0	0	0	0	-48.29	0.27	0.88
OSR2	Q15366	PCBP2	10|12	22	11	2	2|15|0|0|0|6|0|7|5|0|0|0|0|5|6|8|4|0|10|8|16|3|7|4|3|13|11|13|0|10|18|4|15|4|7|4|7|3|1	0	0	0	0	0	-33.73	0.85	0.86
ZNF582	Q15366	PCBP2	7|5	12	6	2	2|15|0|0|0|6|0|7|5|0|0|0|0|5|6|8|4|0|10|8|16|3|7|4|3|13|11|13|0|10|18|4|15|4|7|4|7|3|1	0	0	0	0	0	-43.34	0.47	0.87
MYNN	Q15366	PCBP2	14|13	27	13.5	2	2|15|0|0|0|6|0|7|5|0|0|0|0|5|6|8|4|0|10|8|16|3|7|4|3|13|11|13|0|10|18|4|15|4|7|4|7|3|1	0	0	0	0	0	-29.16	1.05	0.86
ZFP82	Q15366	PCBP2	8|10	18	9	2	2|15|0|0|0|6|0|7|5|0|0|0|0|5|6|8|4|0|10|8|16|3|7|4|3|13|11|13|0|10|18|4|15|4|7|4|7|3|1	0	0	0	0	0	-37.21	0.7	0.87
PATZ1	Q15366	PCBP2	8|7	15	7.5	2	2|15|0|0|0|6|0|7|5|0|0|0|0|5|6|8|4|0|10|8|16|3|7|4|3|13|11|13|0|10|18|4|15|4|7|4|7|3|1	0	0	0	0	0	-39.12	0.58	0.87
ZNF549	Q15366	PCBP2	0|1	1	0.5	2	2|15|0|0|0|6|0|7|5|0|0|0|0|5|6|8|4|0|10|8|16|3|7|4|3|13|11|13|0|10|18|4|15|4|7|4|7|3|1	0	0	0	0	0	-58.39	0.04	0.88
ZNF610	Q15366	PCBP2	2|3	5	2.5	2	2|15|0|0|0|6|0|7|5|0|0|0|0|5|6|8|4|0|10|8|16|3|7|4|3|13|11|13|0|10|18|4|15|4|7|4|7|3|1	0	0	0	0	0	-51.16	0.19	0.88
ZNF37A	Q15366	PCBP2	0|6	6	3	2	2|15|0|0|0|6|0|7|5|0|0|0|0|5|6|8|4|0|10|8|16|3|7|4|3|13|11|13|0|10|18|4|15|4|7|4|7|3|1	0	0	0	0	0	-58.39	0.23	0.87
ZNF394	Q15366	PCBP2	4|2	6	3	2	2|15|0|0|0|6|0|7|5|0|0|0|0|5|6|8|4|0|10|8|16|3|7|4|3|13|11|13|0|10|18|4|15|4|7|4|7|3|1	0	0	0	0	0	-51.16	0.23	0.88
MAZ	Q15366	PCBP2	11|19	30	15	2	2|15|0|0|0|6|0|7|5|0|0|0|0|5|6|8|4|0|10|8|16|3|7|4|3|13|11|13|0|10|18|4|15|4|7|4|7|3|1	0	0	0	0	0	-32.13	1.16	0.84
ZNF449	Q15366	PCBP2	12|6	18	9	2	2|15|0|0|0|6|0|7|5|0|0|0|0|5|6|8|4|0|10|8|16|3|7|4|3|13|11|13|0|10|18|4|15|4|7|4|7|3|1	0	0	0	0	0	-41.15	0.7	0.86
ZNF280A	Q15366	PCBP2	13|12	25	12.5	2	2|15|0|0|0|6|0|7|5|0|0|0|0|5|6|8|4|0|10|8|16|3|7|4|3|13|11|13|0|10|18|4|15|4|7|4|7|3|1	0	0	0	0	0	-30.62	0.97	0.86
GTF3A	Q15366	PCBP2	16|8	24	12	2	2|15|0|0|0|6|0|7|5|0|0|0|0|5|6|8|4|0|10|8|16|3|7|4|3|13|11|13|0|10|18|4|15|4|7|4|7|3|1	0	0	0	0	0	-37.21	0.93	0.85
ZNF547	Q15366	PCBP2	10|5	15	7.5	2	2|15|0|0|0|6|0|7|5|0|0|0|0|5|6|8|4|0|10|8|16|3|7|4|3|13|11|13|0|10|18|4|15|4|7|4|7|3|1	0	0	0	0	0	-43.34	0.58	0.87
PRDM1	Q15366	PCBP2	9|15	24	12	2	2|15|0|0|0|6|0|7|5|0|0|0|0|5|6|8|4|0|10|8|16|3|7|4|3|13|11|13|0|10|18|4|15|4|7|4|7|3|1	0	0	0	0	0	-35.42	0.93	0.86
ZNF778	Q15366	PCBP2	2|5	7	3.5	2	2|15|0|0|0|6|0|7|5|0|0|0|0|5|6|8|4|0|10|8|16|3|7|4|3|13|11|13|0|10|18|4|15|4|7|4|7|3|1	0	0	0	0	0	-51.16	0.27	0.88
SCRT1	Q15366	PCBP2	13|8	21	10.5	2	2|15|0|0|0|6|0|7|5|0|0|0|0|5|6|8|4|0|10|8|16|3|7|4|3|13|11|13|0|10|18|4|15|4|7|4|7|3|1	0	0	0	0	0	-37.21	0.81	0.86
ZNF502	Q15366	PCBP2	10|10	20	10	2	2|15|0|0|0|6|0|7|5|0|0|0|0|5|6|8|4|0|10|8|16|3|7|4|3|13|11|13|0|10|18|4|15|4|7|4|7|3|1	0	0	0	0	0	-33.73	0.78	0.87
ZNF563	Q15366	PCBP2	10|9	19	9.5	2	2|15|0|0|0|6|0|7|5|0|0|0|0|5|6|8|4|0|10|8|16|3|7|4|3|13|11|13|0|10|18|4|15|4|7|4|7|3|1	0	0	0	0	0	-35.42	0.74	0.87
ZNF770	Q15366	PCBP2	2|5	7	3.5	2	2|15|0|0|0|6|0|7|5|0|0|0|0|5|6|8|4|0|10|8|16|3|7|4|3|13|11|13|0|10|18|4|15|4|7|4|7|3|1	0	0	0	0	0	-51.16	0.27	0.88
ZSCAN30	Q15366	PCBP2	13|17	30	15	2	2|15|0|0|0|6|0|7|5|0|0|0|0|5|6|8|4|0|10|8|16|3|7|4|3|13|11|13|0|10|18|4|15|4|7|4|7|3|1	0	0	0	0	0	-29.16	1.16	0.85
ZNF37A	O60573	EIF4E2	1|0	1	0.5	2	0|0|0|0|0|0|0|0|0|0|0|0|0|0|0|0|0|0|0|0|0|0|0|0|0|0|0|0|0|0|0|0|0|0|0|0|0|0|0	0	0	0	0	0	-3	5	0.88
ZNF692	O60573	EIF4E2	0|1	1	0.5	2	0|0|0|0|0|0|0|0|0|0|0|0|0|0|0|0|0|0|0|0|0|0|0|0|0|0|0|0|0|0|0|0|0|0|0|0|0|0|0	0	0	0	0	0	-3	5	0.88
ZNF329	O60573	EIF4E2	1|0	1	0.5	2	0|0|0|0|0|0|0|0|0|0|0|0|0|0|0|0|0|0|0|0|0|0|0|0|0|0|0|0|0|0|0|0|0|0|0|0|0|0|0	0	0	0	0	0	-3	5	0.88
ZNF8	O60573	EIF4E2	0|2	2	1	2	0|0|0|0|0|0|0|0|0|0|0|0|0|0|0|0|0|0|0|0|0|0|0|0|0|0|0|0|0|0|0|0|0|0|0|0|0|0|0	0.41	0.82	0.41	0.82	0.41	-3	10	0.28
ZNF214	Q15365	PCBP1	2|0	2	1	2	5|10|3|0|2|1|0|1|0|0|0|0|0|0|0|4|0|0|5|3|8|0|0|0|2|5|5|4|0|10|28|4|12|4|4|6|8|3|0	0	0	0	0	0	-43.5	0.1	0.88
ZNF490	Q15365	PCBP1	2|2	4	2	2	5|10|3|0|2|1|0|1|0|0|0|0|0|0|0|4|0|0|5|3|8|0|0|0|2|5|5|4|0|10|28|4|12|4|4|6|8|3|0	0	0	0	0	0	-36.84	0.21	0.88
ZNF331	Q15365	PCBP1	2|6	8	4	2	5|10|3|0|2|1|0|1|0|0|0|0|0|0|0|4|0|0|5|3|8|0|0|0|2|5|5|4|0|10|28|4|12|4|4|6|8|3|0	0	0	0	0	0	-36.84	0.41	0.86
ZNF250	Q15365	PCBP1	5|11	16	8	2	5|10|3|0|2|1|0|1|0|0|0|0|0|0|0|4|0|0|5|3|8|0|0|0|2|5|5|4|0|10|28|4|12|4|4|6|8|3|0	0	0	0	0	0	-29.86	0.82	0.84
GLIS1	Q15365	PCBP1	10|8	18	9	2	5|10|3|0|2|1|0|1|0|0|0|0|0|0|0|4|0|0|5|3|8|0|0|0|2|5|5|4|0|10|28|4|12|4|4|6|8|3|0	0	0	0	0	0	-24.57	0.93	0.85
ZNF595	Q15365	PCBP1	3|2	5	2.5	2	5|10|3|0|2|1|0|1|0|0|0|0|0|0|0|4|0|0|5|3|8|0|0|0|2|5|5|4|0|10|28|4|12|4|4|6|8|3|0	0	0	0	0	0	-36.84	0.26	0.88
ZNF257	Q15365	PCBP1	1|0	1	0.5	2	5|10|3|0|2|1|0|1|0|0|0|0|0|0|0|4|0|0|5|3|8|0|0|0|2|5|5|4|0|10|28|4|12|4|4|6|8|3|0	0	0	0	0	0	-43.5	0.05	0.88
ZSCAN5C	Q15365	PCBP1	11|11	22	11	2	5|10|3|0|2|1|0|1|0|0|0|0|0|0|0|4|0|0|5|3|8|0|0|0|2|5|5|4|0|10|28|4|12|4|4|6|8|3|0	0	0	0	0	0	-20.1	1.13	0.84
ZNF596	Q15365	PCBP1	4|6	10	5	2	5|10|3|0|2|1|0|1|0|0|0|0|0|0|0|4|0|0|5|3|8|0|0|0|2|5|5|4|0|10|28|4|12|4|4|6|8|3|0	0	0	0	0	0	-31.95	0.52	0.86
ZNF594	Q15365	PCBP1	10|4	14	7	2	5|10|3|0|2|1|0|1|0|0|0|0|0|0|0|4|0|0|5|3|8|0|0|0|2|5|5|4|0|10|28|4|12|4|4|6|8|3|0	0	0	0	0	0	-31.95	0.72	0.85
ZNF419	Q15365	PCBP1	18|19	37	18.5	2	5|10|3|0|2|1|0|1|0|0|0|0|0|0|0|4|0|0|5|3|8|0|0|0|2|5|5|4|0|10|28|4|12|4|4|6|8|3|0	0	0	0	0	0	-11.82	1.91	0.78
ZNF16	Q15365	PCBP1	3|1	4	2	2	5|10|3|0|2|1|0|1|0|0|0|0|0|0|0|4|0|0|5|3|8|0|0|0|2|5|5|4|0|10|28|4|12|4|4|6|8|3|0	0	0	0	0	0	-39.82	0.21	0.88
ZNF71	Q15365	PCBP1	11|15	26	13	2	5|10|3|0|2|1|0|1|0|0|0|0|0|0|0|4|0|0|5|3|8|0|0|0|2|5|5|4|0|10|28|4|12|4|4|6|8|3|0	0	0	0	0	0	-20.1	1.34	0.82
ZNF816	Q15365	PCBP1	1|4	5	2.5	2	5|10|3|0|2|1|0|1|0|0|0|0|0|0|0|4|0|0|5|3|8|0|0|0|2|5|5|4|0|10|28|4|12|4|4|6|8|3|0	0	0	0	0	0	-39.82	0.26	0.86
IKZF3	Q15365	PCBP1	8|6	14	7	2	5|10|3|0|2|1|0|1|0|0|0|0|0|0|0|4|0|0|5|3|8|0|0|0|2|5|5|4|0|10|28|4|12|4|4|6|8|3|0	0	0	0	0	0	-27.95	0.72	0.85
ZBTB6	Q15365	PCBP1	4|1	5	2.5	2	5|10|3|0|2|1|0|1|0|0|0|0|0|0|0|4|0|0|5|3|8|0|0|0|2|5|5|4|0|10|28|4|12|4|4|6|8|3|0	0	0	0	0	0	-39.82	0.26	0.86
ZNF140	Q15365	PCBP1	3|4	7	3.5	2	5|10|3|0|2|1|0|1|0|0|0|0|0|0|0|4|0|0|5|3|8|0|0|0|2|5|5|4|0|10|28|4|12|4|4|6|8|3|0	0	0	0	0	0	-34.25	0.36	0.86
ZNF708	Q15365	PCBP1	9|10	19	9.5	2	5|10|3|0|2|1|0|1|0|0|0|0|0|0|0|4|0|0|5|3|8|0|0|0|2|5|5|4|0|10|28|4|12|4|4|6|8|3|0	0	0	0	0	0	-23.05	0.98	0.85
FEZF1	Q15365	PCBP1	10|10	20	10	2	5|10|3|0|2|1|0|1|0|0|0|0|0|0|0|4|0|0|5|3|8|0|0|0|2|5|5|4|0|10|28|4|12|4|4|6|8|3|0	0	0	0	0	0	-21.54	1.03	0.85
MZF1	Q15365	PCBP1	4|4	8	4	2	5|10|3|0|2|1|0|1|0|0|0|0|0|0|0|4|0|0|5|3|8|0|0|0|2|5|5|4|0|10|28|4|12|4|4|6|8|3|0	0	0	0	0	0	-31.95	0.41	0.86
ZBTB14	Q15365	PCBP1	7|6	13	6.5	2	5|10|3|0|2|1|0|1|0|0|0|0|0|0|0|4|0|0|5|3|8|0|0|0|2|5|5|4|0|10|28|4|12|4|4|6|8|3|0	0	0	0	0	0	-27.95	0.67	0.86
ZBTB42	Q15365	PCBP1	4|2	6	3	2	5|10|3|0|2|1|0|1|0|0|0|0|0|0|0|4|0|0|5|3|8|0|0|0|2|5|5|4|0|10|28|4|12|4|4|6|8|3|0	0	0	0	0	0	-36.84	0.31	0.86
ZNF8	Q15365	PCBP1	5|8	13	6.5	2	5|10|3|0|2|1|0|1|0|0|0|0|0|0|0|4|0|0|5|3|8|0|0|0|2|5|5|4|0|10|28|4|12|4|4|6|8|3|0	0	0	0	0	0	-29.86	0.67	0.85
ZFP3	Q15365	PCBP1	0|2	2	1	2	5|10|3|0|2|1|0|1|0|0|0|0|0|0|0|4|0|0|5|3|8|0|0|0|2|5|5|4|0|10|28|4|12|4|4|6|8|3|0	0	0	0	0	0	-43.5	0.1	0.88
KLF7	Q15365	PCBP1	8|6	14	7	2	5|10|3|0|2|1|0|1|0|0|0|0|0|0|0|4|0|0|5|3|8|0|0|0|2|5|5|4|0|10|28|4|12|4|4|6|8|3|0	0	0	0	0	0	-27.95	0.72	0.85
ZNF436	Q15365	PCBP1	6|5	11	5.5	2	5|10|3|0|2|1|0|1|0|0|0|0|0|0|0|4|0|0|5|3|8|0|0|0|2|5|5|4|0|10|28|4|12|4|4|6|8|3|0	0	0	0	0	0	-29.86	0.57	0.86
ZNF768	Q15365	PCBP1	10|13	23	11.5	2	5|10|3|0|2|1|0|1|0|0|0|0|0|0|0|4|0|0|5|3|8|0|0|0|2|5|5|4|0|10|28|4|12|4|4|6|8|3|0	0	0	0	0	0	-21.54	1.19	0.83
KLF1	Q15365	PCBP1	9|5	14	7	2	5|10|3|0|2|1|0|1|0|0|0|0|0|0|0|4|0|0|5|3|8|0|0|0|2|5|5|4|0|10|28|4|12|4|4|6|8|3|0	0	0	0	0	0	-29.86	0.72	0.85
ZNF418	Q15365	PCBP1	3|1	4	2	2	5|10|3|0|2|1|0|1|0|0|0|0|0|0|0|4|0|0|5|3|8|0|0|0|2|5|5|4|0|10|28|4|12|4|4|6|8|3|0	0	0	0	0	0	-39.82	0.21	0.88
ZNF513	Q15365	PCBP1	2|4	6	3	2	5|10|3|0|2|1|0|1|0|0|0|0|0|0|0|4|0|0|5|3|8|0|0|0|2|5|5|4|0|10|28|4|12|4|4|6|8|3|0	0	0	0	0	0	-36.84	0.31	0.86
ZNF667	Q15365	PCBP1	7|2	9	4.5	2	5|10|3|0|2|1|0|1|0|0|0|0|0|0|0|4|0|0|5|3|8|0|0|0|2|5|5|4|0|10|28|4|12|4|4|6|8|3|0	0	0	0	0	0	-36.84	0.46	0.86
ZNF184	Q15365	PCBP1	3|0	3	1.5	2	5|10|3|0|2|1|0|1|0|0|0|0|0|0|0|4|0|0|5|3|8|0|0|0|2|5|5|4|0|10|28|4|12|4|4|6|8|3|0	0	0	0	0	0	-43.5	0.15	0.88
ZFP28	Q15365	PCBP1	3|5	8	4	2	5|10|3|0|2|1|0|1|0|0|0|0|0|0|0|4|0|0|5|3|8|0|0|0|2|5|5|4|0|10|28|4|12|4|4|6|8|3|0	0	0	0	0	0	-34.25	0.41	0.86
ZNF320	Q15365	PCBP1	7|5	12	6	2	5|10|3|0|2|1|0|1|0|0|0|0|0|0|0|4|0|0|5|3|8|0|0|0|2|5|5|4|0|10|28|4|12|4|4|6|8|3|0	0	0	0	0	0	-29.86	0.62	0.86
ZNF322	Q15365	PCBP1	10|13	23	11.5	2	5|10|3|0|2|1|0|1|0|0|0|0|0|0|0|4|0|0|5|3|8|0|0|0|2|5|5|4|0|10|28|4|12|4|4|6|8|3|0	0	0	0	0	0	-21.54	1.19	0.83
ZNF189	Q15365	PCBP1	3|3	6	3	2	5|10|3|0|2|1|0|1|0|0|0|0|0|0|0|4|0|0|5|3|8|0|0|0|2|5|5|4|0|10|28|4|12|4|4|6|8|3|0	0	0	0	0	0	-34.25	0.31	0.88
ZNF34	Q15365	PCBP1	2|2	4	2	2	5|10|3|0|2|1|0|1|0|0|0|0|0|0|0|4|0|0|5|3|8|0|0|0|2|5|5|4|0|10|28|4|12|4|4|6|8|3|0	0	0	0	0	0	-36.84	0.21	0.88
ZNF329	Q15365	PCBP1	2|3	5	2.5	2	5|10|3|0|2|1|0|1|0|0|0|0|0|0|0|4|0|0|5|3|8|0|0|0|2|5|5|4|0|10|28|4|12|4|4|6|8|3|0	0	0	0	0	0	-36.84	0.26	0.88
OSR2	Q15365	PCBP1	8|8	16	8	2	5|10|3|0|2|1|0|1|0|0|0|0|0|0|0|4|0|0|5|3|8|0|0|0|2|5|5|4|0|10|28|4|12|4|4|6|8|3|0	0	0	0	0	0	-24.57	0.82	0.85
ZIM3	Q15365	PCBP1	0|4	4	2	2	5|10|3|0|2|1|0|1|0|0|0|0|0|0|0|4|0|0|5|3|8|0|0|0|2|5|5|4|0|10|28|4|12|4|4|6|8|3|0	0	0	0	0	0	-43.5	0.21	0.86
ZNF582	Q15365	PCBP1	2|0	2	1	2	5|10|3|0|2|1|0|1|0|0|0|0|0|0|0|4|0|0|5|3|8|0|0|0|2|5|5|4|0|10|28|4|12|4|4|6|8|3|0	0	0	0	0	0	-43.5	0.1	0.88
MYNN	Q15365	PCBP1	3|3	6	3	2	5|10|3|0|2|1|0|1|0|0|0|0|0|0|0|4|0|0|5|3|8|0|0|0|2|5|5|4|0|10|28|4|12|4|4|6|8|3|0	0	0	0	0	0	-34.25	0.31	0.88
ZFP82	Q15365	PCBP1	7|9	16	8	2	5|10|3|0|2|1|0|1|0|0|0|0|0|0|0|4|0|0|5|3|8|0|0|0|2|5|5|4|0|10|28|4|12|4|4|6|8|3|0	0	0	0	0	0	-26.2	0.82	0.85
PATZ1	Q15365	PCBP1	4|8	12	6	2	5|10|3|0|2|1|0|1|0|0|0|0|0|0|0|4|0|0|5|3|8|0|0|0|2|5|5|4|0|10|28|4|12|4|4|6|8|3|0	0	0	0	0	0	-31.95	0.62	0.85
ZNF549	Q15365	PCBP1	1|2	3	1.5	2	5|10|3|0|2|1|0|1|0|0|0|0|0|0|0|4|0|0|5|3|8|0|0|0|2|5|5|4|0|10|28|4|12|4|4|6|8|3|0	0	0	0	0	0	-39.82	0.15	0.88
ZNF610	Q15365	PCBP1	2|4	6	3	2	5|10|3|0|2|1|0|1|0|0|0|0|0|0|0|4|0|0|5|3|8|0|0|0|2|5|5|4|0|10|28|4|12|4|4|6|8|3|0	0	0	0	0	0	-36.84	0.31	0.86
ZNF692	Q15365	PCBP1	2|0	2	1	2	5|10|3|0|2|1|0|1|0|0|0|0|0|0|0|4|0|0|5|3|8|0|0|0|2|5|5|4|0|10|28|4|12|4|4|6|8|3|0	0	0	0	0	0	-43.5	0.1	0.88
ZNF394	Q15365	PCBP1	3|3	6	3	2	5|10|3|0|2|1|0|1|0|0|0|0|0|0|0|4|0|0|5|3|8|0|0|0|2|5|5|4|0|10|28|4|12|4|4|6|8|3|0	0	0	0	0	0	-34.25	0.31	0.88
MAZ	Q15365	PCBP1	6|12	18	9	2	5|10|3|0|2|1|0|1|0|0|0|0|0|0|0|4|0|0|5|3|8|0|0|0|2|5|5|4|0|10|28|4|12|4|4|6|8|3|0	0	0	0	0	0	-27.95	0.93	0.84
ZNF449	Q15365	PCBP1	4|4	8	4	2	5|10|3|0|2|1|0|1|0|0|0|0|0|0|0|4|0|0|5|3|8|0|0|0|2|5|5|4|0|10|28|4|12|4|4|6|8|3|0	0	0	0	0	0	-31.95	0.41	0.86
ZNF280A	Q15365	PCBP1	2|2	4	2	2	5|10|3|0|2|1|0|1|0|0|0|0|0|0|0|4|0|0|5|3|8|0|0|0|2|5|5|4|0|10|28|4|12|4|4|6|8|3|0	0	0	0	0	0	-36.84	0.21	0.88
GTF3A	Q15365	PCBP1	4|10	14	7	2	5|10|3|0|2|1|0|1|0|0|0|0|0|0|0|4|0|0|5|3|8|0|0|0|2|5|5|4|0|10|28|4|12|4|4|6|8|3|0	0	0	0	0	0	-31.95	0.72	0.85
ZNF547	Q15365	PCBP1	7|7	14	7	2	5|10|3|0|2|1|0|1|0|0|0|0|0|0|0|4|0|0|5|3|8|0|0|0|2|5|5|4|0|10|28|4|12|4|4|6|8|3|0	0	0	0	0	0	-26.2	0.72	0.86
PRDM1	Q15365	PCBP1	3|5	8	4	2	5|10|3|0|2|1|0|1|0|0|0|0|0|0|0|4|0|0|5|3|8|0|0|0|2|5|5|4|0|10|28|4|12|4|4|6|8|3|0	0	0	0	0	0	-34.25	0.41	0.86
ZNF778	Q15365	PCBP1	2|0	2	1	2	5|10|3|0|2|1|0|1|0|0|0|0|0|0|0|4|0|0|5|3|8|0|0|0|2|5|5|4|0|10|28|4|12|4|4|6|8|3|0	0	0	0	0	0	-43.5	0.1	0.88
SCRT1	Q15365	PCBP1	6|6	12	6	2	5|10|3|0|2|1|0|1|0|0|0|0|0|0|0|4|0|0|5|3|8|0|0|0|2|5|5|4|0|10|28|4|12|4|4|6|8|3|0	0	0	0	0	0	-27.95	0.62	0.86
ZNF37A	Q15365	PCBP1	4|1	5	2.5	2	5|10|3|0|2|1|0|1|0|0|0|0|0|0|0|4|0|0|5|3|8|0|0|0|2|5|5|4|0|10|28|4|12|4|4|6|8|3|0	0	0	0	0	0	-39.82	0.26	0.86
ZNF563	Q15365	PCBP1	2|3	5	2.5	2	5|10|3|0|2|1|0|1|0|0|0|0|0|0|0|4|0|0|5|3|8|0|0|0|2|5|5|4|0|10|28|4|12|4|4|6|8|3|0	0	0	0	0	0	-36.84	0.26	0.88
ZNF770	Q15365	PCBP1	2|4	6	3	2	5|10|3|0|2|1|0|1|0|0|0|0|0|0|0|4|0|0|5|3|8|0|0|0|2|5|5|4|0|10|28|4|12|4|4|6|8|3|0	0	0	0	0	0	-36.84	0.31	0.86
ZSCAN30	Q15365	PCBP1	8|11	19	9.5	2	5|10|3|0|2|1|0|1|0|0|0|0|0|0|0|4|0|0|5|3|8|0|0|0|2|5|5|4|0|10|28|4|12|4|4|6|8|3|0	0	0	0	0	0	-24.57	0.98	0.84
GTF3A	Q9BVL4	Q9BVL4	1|0	1	0.5	2	0|0|0|0|0|0|0|0|0|0|0|0|0|0|0|0|0|0|0|0|0|0|0|0|0|0|0|0|0|0|0|0|0|0|0|0|0|0|0	0	0	0	0	0	-3	5	0.88
ZNF708	Q9BVL4	Q9BVL4	1|0	1	0.5	2	0|0|0|0|0|0|0|0|0|0|0|0|0|0|0|0|0|0|0|0|0|0|0|0|0|0|0|0|0|0|0|0|0|0|0|0|0|0|0	0	0	0	0	0	-3	5	0.88
ZNF449	Q9BVL4	Q9BVL4	1|0	1	0.5	2	0|0|0|0|0|0|0|0|0|0|0|0|0|0|0|0|0|0|0|0|0|0|0|0|0|0|0|0|0|0|0|0|0|0|0|0|0|0|0	0	0	0	0	0	-3	5	0.88
IKZF3	Q9H444	CHMP4B	1|0	1	0.5	2	0|1|0|0|0|0|0|0|0|0|0|0|0|0|0|0|0|0|0|0|2|0|0|0|0|0|0|0|0|0|0|0|0|0|0|0|0|0|0	0	0	0	0	0	-3.74	1.67	0.88
ZNF394	Q9H444	CHMP4B	1|0	1	0.5	2	0|1|0|0|0|0|0|0|0|0|0|0|0|0|0|0|0|0|0|0|2|0|0|0|0|0|0|0|0|0|0|0|0|0|0|0|0|0|0	0	0	0	0	0	-3.74	1.67	0.88
ZNF594	Q9H444	CHMP4B	2|0	2	1	2	0|1|0|0|0|0|0|0|0|0|0|0|0|0|0|0|0|0|0|0|2|0|0|0|0|0|0|0|0|0|0|0|0|0|0|0|0|0|0	0.18	0.36	0.18	0.36	0.18	-3.74	3.33	0.44
KLF1	Q9H444	CHMP4B	2|0	2	1	2	0|1|0|0|0|0|0|0|0|0|0|0|0|0|0|0|0|0|0|0|2|0|0|0|0|0|0|0|0|0|0|0|0|0|0|0|0|0|0	0.18	0.36	0.18	0.36	0.18	-3.74	3.33	0.44
ZNF331	P29401	TKT	0|5	5	2.5	2	6|12|2|0|5|5|0|2|5|0|0|0|0|0|0|6|0|0|9|4|20|0|5|4|0|13|11|6|0|4|6|4|12|4|8|1|3|0|0	0	0	0	0	0	-46.61	0.24	0.87
ZNF250	P29401	TKT	5|11	16	8	2	6|12|2|0|5|5|0|2|5|0|0|0|0|0|0|6|0|0|9|4|20|0|5|4|0|13|11|6|0|4|6|4|12|4|8|1|3|0|0	0	0	0	0	0	-32.67	0.78	0.85
ZNF34	P29401	TKT	2|0	2	1	2	6|12|2|0|5|5|0|2|5|0|0|0|0|0|0|6|0|0|9|4|20|0|5|4|0|13|11|6|0|4|6|4|12|4|8|1|3|0|0	0	0	0	0	0	-46.61	0.1	0.88
ZNF596	P29401	TKT	0|9	9	4.5	2	6|12|2|0|5|5|0|2|5|0|0|0|0|0|0|6|0|0|9|4|20|0|5|4|0|13|11|6|0|4|6|4|12|4|8|1|3|0|0	0	0	0	0	0	-46.61	0.44	0.86
ZNF594	P29401	TKT	23|1	24	12	2	6|12|2|0|5|5|0|2|5|0|0|0|0|0|0|6|0|0|9|4|20|0|5|4|0|13|11|6|0|4|6|4|12|4|8|1|3|0|0	0	0	0	0	0	-42.87	1.17	0.74
ZNF419	P29401	TKT	1|4	5	2.5	2	6|12|2|0|5|5|0|2|5|0|0|0|0|0|0|6|0|0|9|4|20|0|5|4|0|13|11|6|0|4|6|4|12|4|8|1|3|0|0	0	0	0	0	0	-42.87	0.24	0.88
ZNF816	P29401	TKT	0|3	3	1.5	2	6|12|2|0|5|5|0|2|5|0|0|0|0|0|0|6|0|0|9|4|20|0|5|4|0|13|11|6|0|4|6|4|12|4|8|1|3|0|0	0	0	0	0	0	-46.61	0.15	0.88
ZSCAN5C	P29401	TKT	6|7	13	6.5	2	6|12|2|0|5|5|0|2|5|0|0|0|0|0|0|6|0|0|9|4|20|0|5|4|0|13|11|6|0|4|6|4|12|4|8|1|3|0|0	0	0	0	0	0	-30.71	0.63	0.86
ZBTB6	P29401	TKT	0|2	2	1	2	6|12|2|0|5|5|0|2|5|0|0|0|0|0|0|6|0|0|9|4|20|0|5|4|0|13|11|6|0|4|6|4|12|4|8|1|3|0|0	0	0	0	0	0	-46.61	0.1	0.88
ZNF140	P29401	TKT	0|3	3	1.5	2	6|12|2|0|5|5|0|2|5|0|0|0|0|0|0|6|0|0|9|4|20|0|5|4|0|13|11|6|0|4|6|4|12|4|8|1|3|0|0	0	0	0	0	0	-46.61	0.15	0.88
ZNF708	P29401	TKT	10|0	10	5	2	6|12|2|0|5|5|0|2|5|0|0|0|0|0|0|6|0|0|9|4|20|0|5|4|0|13|11|6|0|4|6|4|12|4|8|1|3|0|0	0	0	0	0	0	-46.61	0.49	0.85
MZF1	P29401	TKT	2|1	3	1.5	2	6|12|2|0|5|5|0|2|5|0|0|0|0|0|0|6|0|0|9|4|20|0|5|4|0|13|11|6|0|4|6|4|12|4|8|1|3|0|0	0	0	0	0	0	-42.87	0.15	0.88
KLF7	P29401	TKT	15|0	15	7.5	2	6|12|2|0|5|5|0|2|5|0|0|0|0|0|0|6|0|0|9|4|20|0|5|4|0|13|11|6|0|4|6|4|12|4|8|1|3|0|0	0	0	0	0	0	-46.61	0.73	0.83
ZNF436	P29401	TKT	10|0	10	5	2	6|12|2|0|5|5|0|2|5|0|0|0|0|0|0|6|0|0|9|4|20|0|5|4|0|13|11|6|0|4|6|4|12|4|8|1|3|0|0	0	0	0	0	0	-46.61	0.49	0.85
IKZF3	P29401	TKT	27|15	42	21	2	6|12|2|0|5|5|0|2|5|0|0|0|0|0|0|6|0|0|9|4|20|0|5|4|0|13|11|6|0|4|6|4|12|4|8|1|3|0|0	0.01	0.02	0.01	0.02	0.01	-17.22	2.04	0.63
KLF1	P29401	TKT	23|4	27	13.5	2	6|12|2|0|5|5|0|2|5|0|0|0|0|0|0|6|0|0|9|4|20|0|5|4|0|13|11|6|0|4|6|4|12|4|8|1|3|0|0	0	0	0	0	0	-34.82	1.31	0.74
ZIM3	P29401	TKT	0|1	1	0.5	2	6|12|2|0|5|5|0|2|5|0|0|0|0|0|0|6|0|0|9|4|20|0|5|4|0|13|11|6|0|4|6|4|12|4|8|1|3|0|0	0	0	0	0	0	-46.61	0.05	0.88
ZNF320	P29401	TKT	14|0	14	7	2	6|12|2|0|5|5|0|2|5|0|0|0|0|0|0|6|0|0|9|4|20|0|5|4|0|13|11|6|0|4|6|4|12|4|8|1|3|0|0	0	0	0	0	0	-46.61	0.68	0.84
ZNF322	P29401	TKT	32|33	65	32.5	2	6|12|2|0|5|5|0|2|5|0|0|0|0|0|0|6|0|0|9|4|20|0|5|4|0|13|11|6|0|4|6|4|12|4|8|1|3|0|0	0.74	0.82	0.74	0.82	0.74	0.68	3.16	0.06
MYNN	P29401	TKT	4|4	8	4	2	6|12|2|0|5|5|0|2|5|0|0|0|0|0|0|6|0|0|9|4|20|0|5|4|0|13|11|6|0|4|6|4|12|4|8|1|3|0|0	0	0	0	0	0	-34.82	0.39	0.88
ZFP82	P29401	TKT	1|0	1	0.5	2	6|12|2|0|5|5|0|2|5|0|0|0|0|0|0|6|0|0|9|4|20|0|5|4|0|13|11|6|0|4|6|4|12|4|8|1|3|0|0	0	0	0	0	0	-46.61	0.05	0.88
PATZ1	P29401	TKT	0|15	15	7.5	2	6|12|2|0|5|5|0|2|5|0|0|0|0|0|0|6|0|0|9|4|20|0|5|4|0|13|11|6|0|4|6|4|12|4|8|1|3|0|0	0	0	0	0	0	-46.61	0.73	0.83
MAZ	P29401	TKT	0|18	18	9	2	6|12|2|0|5|5|0|2|5|0|0|0|0|0|0|6|0|0|9|4|20|0|5|4|0|13|11|6|0|4|6|4|12|4|8|1|3|0|0	0	0	0	0	0	-46.61	0.87	0.81
ZNF778	P29401	TKT	0|3	3	1.5	2	6|12|2|0|5|5|0|2|5|0|0|0|0|0|0|6|0|0|9|4|20|0|5|4|0|13|11|6|0|4|6|4|12|4|8|1|3|0|0	0	0	0	0	0	-46.61	0.15	0.88
SCRT1	P29401	TKT	12|4	16	8	2	6|12|2|0|5|5|0|2|5|0|0|0|0|0|0|6|0|0|9|4|20|0|5|4|0|13|11|6|0|4|6|4|12|4|8|1|3|0|0	0	0	0	0	0	-34.82	0.78	0.85
ZNF394	P29401	TKT	4|5	9	4.5	2	6|12|2|0|5|5|0|2|5|0|0|0|0|0|0|6|0|0|9|4|20|0|5|4|0|13|11|6|0|4|6|4|12|4|8|1|3|0|0	0	0	0	0	0	-34.82	0.44	0.87
ZNF770	P29401	TKT	0|3	3	1.5	2	6|12|2|0|5|5|0|2|5|0|0|0|0|0|0|6|0|0|9|4|20|0|5|4|0|13|11|6|0|4|6|4|12|4|8|1|3|0|0	0	0	0	0	0	-46.61	0.15	0.88
ZSCAN30	P29401	TKT	12|17	29	14.5	2	6|12|2|0|5|5|0|2|5|0|0|0|0|0|0|6|0|0|9|4|20|0|5|4|0|13|11|6|0|4|6|4|12|4|8|1|3|0|0	0	0	0	0	0	-21.27	1.41	0.82
IKZF3	Q9UMS4	PRPF19	8|3	11	5.5	2	0|6|1|0|0|0|0|0|0|0|0|0|0|0|0|0|0|0|0|0|7|0|0|0|1|3|4|3|0|8|10|2|9|2|1|0|0|1|2	0	0	0	0	0	-17.45	1.02	0.77
ZNF331	Q9UMS4	PRPF19	0|2	2	1	2	0|6|1|0|0|0|0|0|0|0|0|0|0|0|0|0|0|0|0|0|7|0|0|0|1|3|4|3|0|8|10|2|9|2|1|0|0|1|2	0	0	0	0	0	-24.95	0.19	0.84
ZNF250	Q9UMS4	PRPF19	0|2	2	1	2	0|6|1|0|0|0|0|0|0|0|0|0|0|0|0|0|0|0|0|0|7|0|0|0|1|3|4|3|0|8|10|2|9|2|1|0|0|1|2	0	0	0	0	0	-24.95	0.19	0.84
ZNF692	Q9UMS4	PRPF19	4|3	7	3.5	2	0|6|1|0|0|0|0|0|0|0|0|0|0|0|0|0|0|0|0|0|7|0|0|0|1|3|4|3|0|8|10|2|9|2|1|0|0|1|2	0	0	0	0	0	-17.45	0.65	0.82
ZNF595	Q9UMS4	PRPF19	0|1	1	0.5	2	0|6|1|0|0|0|0|0|0|0|0|0|0|0|0|0|0|0|0|0|7|0|0|0|1|3|4|3|0|8|10|2|9|2|1|0|0|1|2	0	0	0	0	0	-24.95	0.09	0.88
ZNF34	Q9UMS4	PRPF19	0|1	1	0.5	2	0|6|1|0|0|0|0|0|0|0|0|0|0|0|0|0|0|0|0|0|7|0|0|0|1|3|4|3|0|8|10|2|9|2|1|0|0|1|2	0	0	0	0	0	-24.95	0.09	0.88
ZFP28	Q9UMS4	PRPF19	0|1	1	0.5	2	0|6|1|0|0|0|0|0|0|0|0|0|0|0|0|0|0|0|0|0|7|0|0|0|1|3|4|3|0|8|10|2|9|2|1|0|0|1|2	0	0	0	0	0	-24.95	0.09	0.88
SCRT1	Q9UMS4	PRPF19	4|2	6	3	2	0|6|1|0|0|0|0|0|0|0|0|0|0|0|0|0|0|0|0|0|7|0|0|0|1|3|4|3|0|8|10|2|9|2|1|0|0|1|2	0	0	0	0	0	-19.45	0.56	0.82
ZNF594	Q9UMS4	PRPF19	12|7	19	9.5	2	0|6|1|0|0|0|0|0|0|0|0|0|0|0|0|0|0|0|0|0|7|0|0|0|1|3|4|3|0|8|10|2|9|2|1|0|0|1|2	0	0.01	0	0.01	0	-11.31	1.76	0.68
ZNF490	Q9UMS4	PRPF19	1|1	2	1	2	0|6|1|0|0|0|0|0|0|0|0|0|0|0|0|0|0|0|0|0|7|0|0|0|1|3|4|3|0|8|10|2|9|2|1|0|0|1|2	0	0	0	0	0	-21.86	0.19	0.88
ZNF71	Q9UMS4	PRPF19	12|9	21	10.5	2	0|6|1|0|0|0|0|0|0|0|0|0|0|0|0|0|0|0|0|0|7|0|0|0|1|3|4|3|0|8|10|2|9|2|1|0|0|1|2	0	0.01	0	0.01	0	-8.66	1.94	0.68
ZNF816	Q9UMS4	PRPF19	0|1	1	0.5	2	0|6|1|0|0|0|0|0|0|0|0|0|0|0|0|0|0|0|0|0|7|0|0|0|1|3|4|3|0|8|10|2|9|2|1|0|0|1|2	0	0	0	0	0	-24.95	0.09	0.88
ZSCAN5C	Q9UMS4	PRPF19	2|4	6	3	2	0|6|1|0|0|0|0|0|0|0|0|0|0|0|0|0|0|0|0|0|7|0|0|0|1|3|4|3|0|8|10|2|9|2|1|0|0|1|2	0	0	0	0	0	-19.45	0.56	0.82
ZNF708	Q9UMS4	PRPF19	4|3	7	3.5	2	0|6|1|0|0|0|0|0|0|0|0|0|0|0|0|0|0|0|0|0|7|0|0|0|1|3|4|3|0|8|10|2|9|2|1|0|0|1|2	0	0	0	0	0	-17.45	0.65	0.82
FEZF1	Q9UMS4	PRPF19	0|8	8	4	2	0|6|1|0|0|0|0|0|0|0|0|0|0|0|0|0|0|0|0|0|7|0|0|0|1|3|4|3|0|8|10|2|9|2|1|0|0|1|2	0	0	0	0	0	-24.95	0.74	0.77
KLF1	Q9UMS4	PRPF19	7|2	9	4.5	2	0|6|1|0|0|0|0|0|0|0|0|0|0|0|0|0|0|0|0|0|7|0|0|0|1|3|4|3|0|8|10|2|9|2|1|0|0|1|2	0	0	0	0	0	-19.45	0.83	0.79
ZBTB42	Q9UMS4	PRPF19	1|0	1	0.5	2	0|6|1|0|0|0|0|0|0|0|0|0|0|0|0|0|0|0|0|0|7|0|0|0|1|3|4|3|0|8|10|2|9|2|1|0|0|1|2	0	0	0	0	0	-24.95	0.09	0.88
ZNF436	Q9UMS4	PRPF19	4|17	21	10.5	2	0|6|1|0|0|0|0|0|0|0|0|0|0|0|0|0|0|0|0|0|7|0|0|0|1|3|4|3|0|8|10|2|9|2|1|0|0|1|2	0.25	0.5	0.25	0.5	0.25	-15.72	1.94	0.4
ZNF768	Q9UMS4	PRPF19	12|11	23	11.5	2	0|6|1|0|0|0|0|0|0|0|0|0|0|0|0|0|0|0|0|0|7|0|0|0|1|3|4|3|0|8|10|2|9|2|1|0|0|1|2	0	0.01	0	0.01	0	-6.23	2.13	0.67
ZNF419	Q9UMS4	PRPF19	0|2	2	1	2	0|6|1|0|0|0|0|0|0|0|0|0|0|0|0|0|0|0|0|0|7|0|0|0|1|3|4|3|0|8|10|2|9|2|1|0|0|1|2	0	0	0	0	0	-24.95	0.19	0.84
GLIS1	Q9UMS4	PRPF19	1|2	3	1.5	2	0|6|1|0|0|0|0|0|0|0|0|0|0|0|0|0|0|0|0|0|7|0|0|0|1|3|4|3|0|8|10|2|9|2|1|0|0|1|2	0	0	0	0	0	-21.86	0.28	0.84
ZNF320	Q9UMS4	PRPF19	3|2	5	2.5	2	0|6|1|0|0|0|0|0|0|0|0|0|0|0|0|0|0|0|0|0|7|0|0|0|1|3|4|3|0|8|10|2|9|2|1|0|0|1|2	0	0	0	0	0	-19.45	0.46	0.83
ZNF322	Q9UMS4	PRPF19	9|10	19	9.5	2	0|6|1|0|0|0|0|0|0|0|0|0|0|0|0|0|0|0|0|0|7|0|0|0|1|3|4|3|0|8|10|2|9|2|1|0|0|1|2	0	0	0	0	0	-8.66	1.76	0.73
ZNF189	Q9UMS4	PRPF19	1|1	2	1	2	0|6|1|0|0|0|0|0|0|0|0|0|0|0|0|0|0|0|0|0|7|0|0|0|1|3|4|3|0|8|10|2|9|2|1|0|0|1|2	0	0	0	0	0	-21.86	0.19	0.88
OSR2	Q9UMS4	PRPF19	6|7	13	6.5	2	0|6|1|0|0|0|0|0|0|0|0|0|0|0|0|0|0|0|0|0|7|0|0|0|1|3|4|3|0|8|10|2|9|2|1|0|0|1|2	0	0	0	0	0	-12.73	1.2	0.79
ZFP82	Q9UMS4	PRPF19	3|6	9	4.5	2	0|6|1|0|0|0|0|0|0|0|0|0|0|0|0|0|0|0|0|0|7|0|0|0|1|3|4|3|0|8|10|2|9|2|1|0|0|1|2	0	0	0	0	0	-17.45	0.83	0.8
PATZ1	Q9UMS4	PRPF19	0|7	7	3.5	2	0|6|1|0|0|0|0|0|0|0|0|0|0|0|0|0|0|0|0|0|7|0|0|0|1|3|4|3|0|8|10|2|9|2|1|0|0|1|2	0	0	0	0	0	-24.95	0.65	0.79
ZNF563	Q9UMS4	PRPF19	1|0	1	0.5	2	0|6|1|0|0|0|0|0|0|0|0|0|0|0|0|0|0|0|0|0|7|0|0|0|1|3|4|3|0|8|10|2|9|2|1|0|0|1|2	0	0	0	0	0	-24.95	0.09	0.88
MAZ	Q9UMS4	PRPF19	8|9	17	8.5	2	0|6|1|0|0|0|0|0|0|0|0|0|0|0|0|0|0|0|0|0|7|0|0|0|1|3|4|3|0|8|10|2|9|2|1|0|0|1|2	0	0	0	0	0	-9.96	1.57	0.75
ZNF449	Q9UMS4	PRPF19	1|0	1	0.5	2	0|6|1|0|0|0|0|0|0|0|0|0|0|0|0|0|0|0|0|0|7|0|0|0|1|3|4|3|0|8|10|2|9|2|1|0|0|1|2	0	0	0	0	0	-24.95	0.09	0.88
GTF3A	Q9UMS4	PRPF19	9|6	15	7.5	2	0|6|1|0|0|0|0|0|0|0|0|0|0|0|0|0|0|0|0|0|7|0|0|0|1|3|4|3|0|8|10|2|9|2|1|0|0|1|2	0	0	0	0	0	-12.73	1.39	0.75
ZNF547	Q9UMS4	PRPF19	1|0	1	0.5	2	0|6|1|0|0|0|0|0|0|0|0|0|0|0|0|0|0|0|0|0|7|0|0|0|1|3|4|3|0|8|10|2|9|2|1|0|0|1|2	0	0	0	0	0	-24.95	0.09	0.88
PRDM1	Q9UMS4	PRPF19	3|9	12	6	2	0|6|1|0|0|0|0|0|0|0|0|0|0|0|0|0|0|0|0|0|7|0|0|0|1|3|4|3|0|8|10|2|9|2|1|0|0|1|2	0	0	0	0	0	-17.45	1.11	0.75
ZNF394	Q9UMS4	PRPF19	2|1	3	1.5	2	0|6|1|0|0|0|0|0|0|0|0|0|0|0|0|0|0|0|0|0|7|0|0|0|1|3|4|3|0|8|10|2|9|2|1|0|0|1|2	0	0	0	0	0	-21.86	0.28	0.84
ZNF770	Q9UMS4	PRPF19	0|1	1	0.5	2	0|6|1|0|0|0|0|0|0|0|0|0|0|0|0|0|0|0|0|0|7|0|0|0|1|3|4|3|0|8|10|2|9|2|1|0|0|1|2	0	0	0	0	0	-24.95	0.09	0.88
ZSCAN30	Q9UMS4	PRPF19	9|13	22	11	2	0|6|1|0|0|0|0|0|0|0|0|0|0|0|0|0|0|0|0|0|7|0|0|0|1|3|4|3|0|8|10|2|9|2|1|0|0|1|2	0.01	0.02	0.01	0.02	0.01	-8.66	2.04	0.64
IKZF3	Q9UNM6	PSMD13	1|0	1	0.5	2	0|0|0|0|0|0|0|0|0|0|0|0|0|0|0|0|0|0|0|0|0|0|0|0|0|0|0|0|0|1|3|0|2|0|2|0|0|1|0	0	0	0	0	0	-5.91	0.56	0.88
ZNF322	Q9UNM6	PSMD13	1|0	1	0.5	2	0|0|0|0|0|0|0|0|0|0|0|0|0|0|0|0|0|0|0|0|0|0|0|0|0|0|0|0|0|1|3|0|2|0|2|0|0|1|0	0	0	0	0	0	-5.91	0.56	0.88
ZNF331	Q9H0S4	DDX47	1|3	4	2	2	0|0|0|0|0|0|0|0|0|0|0|0|0|0|0|0|0|0|0|0|0|0|0|0|3|1|0|0|0|1|0|0|2|0|0|0|0|1|0	0.11	0.22	0.11	0.22	0.11	-3.86	2.5	0.49
GLIS1	Q9H0S4	DDX47	1|0	1	0.5	2	0|0|0|0|0|0|0|0|0|0|0|0|0|0|0|0|0|0|0|0|0|0|0|0|3|1|0|0|0|1|0|0|2|0|0|0|0|1|0	0	0	0	0	0	-5.54	0.62	0.88
ZNF34	Q9H0S4	DDX47	0|2	2	1	2	0|0|0|0|0|0|0|0|0|0|0|0|0|0|0|0|0|0|0|0|0|0|0|0|3|1|0|0|0|1|0|0|2|0|0|0|0|1|0	0.04	0.08	0.04	0.08	0.04	-5.54	1.25	0.57
SCRT1	Q9H0S4	DDX47	2|2	4	2	2	0|0|0|0|0|0|0|0|0|0|0|0|0|0|0|0|0|0|0|0|0|0|0|0|3|1|0|0|0|1|0|0|2|0|0|0|0|1|0	0.08	0.08	0.08	0.08	0.08	-2.45	2.5	0.53
ZNF595	Q9H0S4	DDX47	1|1	2	1	2	0|0|0|0|0|0|0|0|0|0|0|0|0|0|0|0|0|0|0|0|0|0|0|0|3|1|0|0|0|1|0|0|2|0|0|0|0|1|0	0	0	0	0	0	-3.86	1.25	0.88
ZNF16	Q9H0S4	DDX47	4|3	7	3.5	2	0|0|0|0|0|0|0|0|0|0|0|0|0|0|0|0|0|0|0|0|0|0|0|0|3|1|0|0|0|1|0|0|2|0|0|0|0|1|0	0.33	0.45	0.33	0.45	0.33	-1.25	4.38	0.36
ZNF816	Q9H0S4	DDX47	0|2	2	1	2	0|0|0|0|0|0|0|0|0|0|0|0|0|0|0|0|0|0|0|0|0|0|0|0|3|1|0|0|0|1|0|0|2|0|0|0|0|1|0	0.04	0.08	0.04	0.08	0.04	-5.54	1.25	0.57
ZSCAN5C	Q9H0S4	DDX47	2|0	2	1	2	0|0|0|0|0|0|0|0|0|0|0|0|0|0|0|0|0|0|0|0|0|0|0|0|3|1|0|0|0|1|0|0|2|0|0|0|0|1|0	0.04	0.08	0.04	0.08	0.04	-5.54	1.25	0.57
ZNF320	Q9H0S4	DDX47	0|1	1	0.5	2	0|0|0|0|0|0|0|0|0|0|0|0|0|0|0|0|0|0|0|0|0|0|0|0|3|1|0|0|0|1|0|0|2|0|0|0|0|1|0	0	0	0	0	0	-5.54	0.62	0.88
ZNF140	Q9H0S4	DDX47	1|1	2	1	2	0|0|0|0|0|0|0|0|0|0|0|0|0|0|0|0|0|0|0|0|0|0|0|0|3|1|0|0|0|1|0|0|2|0|0|0|0|1|0	0	0	0	0	0	-3.86	1.25	0.88
ZNF708	Q9H0S4	DDX47	3|4	7	3.5	2	0|0|0|0|0|0|0|0|0|0|0|0|0|0|0|0|0|0|0|0|0|0|0|0|3|1|0|0|0|1|0|0|2|0|0|0|0|1|0	0.33	0.45	0.33	0.45	0.33	-1.25	4.38	0.36
FEZF1	Q9H0S4	DDX47	1|0	1	0.5	2	0|0|0|0|0|0|0|0|0|0|0|0|0|0|0|0|0|0|0|0|0|0|0|0|3|1|0|0|0|1|0|0|2|0|0|0|0|1|0	0	0	0	0	0	-5.54	0.62	0.88
MZF1	Q9H0S4	DDX47	0|1	1	0.5	2	0|0|0|0|0|0|0|0|0|0|0|0|0|0|0|0|0|0|0|0|0|0|0|0|3|1|0|0|0|1|0|0|2|0|0|0|0|1|0	0	0	0	0	0	-5.54	0.62	0.88
ZBTB14	Q9H0S4	DDX47	3|0	3	1.5	2	0|0|0|0|0|0|0|0|0|0|0|0|0|0|0|0|0|0|0|0|0|0|0|0|3|1|0|0|0|1|0|0|2|0|0|0|0|1|0	0.11	0.22	0.11	0.22	0.11	-5.54	1.88	0.49
KLF7	Q9H0S4	DDX47	2|3	5	2.5	2	0|0|0|0|0|0|0|0|0|0|0|0|0|0|0|0|0|0|0|0|0|0|0|0|3|1|0|0|0|1|0|0|2|0|0|0|0|1|0	0.15	0.22	0.15	0.22	0.15	-2.45	3.12	0.46
ZNF436	Q9H0S4	DDX47	0|2	2	1	2	0|0|0|0|0|0|0|0|0|0|0|0|0|0|0|0|0|0|0|0|0|0|0|0|3|1|0|0|0|1|0|0|2|0|0|0|0|1|0	0.04	0.08	0.04	0.08	0.04	-5.54	1.25	0.57
ZNF768	Q9H0S4	DDX47	2|4	6	3	2	0|0|0|0|0|0|0|0|0|0|0|0|0|0|0|0|0|0|0|0|0|0|0|0|3|1|0|0|0|1|0|0|2|0|0|0|0|1|0	0.26	0.45	0.26	0.45	0.26	-2.45	3.75	0.38
ZNF419	Q9H0S4	DDX47	1|1	2	1	2	0|0|0|0|0|0|0|0|0|0|0|0|0|0|0|0|0|0|0|0|0|0|0|0|3|1|0|0|0|1|0|0|2|0|0|0|0|1|0	0	0	0	0	0	-3.86	1.25	0.88
ZNF418	Q9H0S4	DDX47	0|1	1	0.5	2	0|0|0|0|0|0|0|0|0|0|0|0|0|0|0|0|0|0|0|0|0|0|0|0|3|1|0|0|0|1|0|0|2|0|0|0|0|1|0	0	0	0	0	0	-5.54	0.62	0.88
ZNF513	Q9H0S4	DDX47	1|1	2	1	2	0|0|0|0|0|0|0|0|0|0|0|0|0|0|0|0|0|0|0|0|0|0|0|0|3|1|0|0|0|1|0|0|2|0|0|0|0|1|0	0	0	0	0	0	-3.86	1.25	0.88
ZNF667	Q9H0S4	DDX47	2|1	3	1.5	2	0|0|0|0|0|0|0|0|0|0|0|0|0|0|0|0|0|0|0|0|0|0|0|0|3|1|0|0|0|1|0|0|2|0|0|0|0|1|0	0.04	0.08	0.04	0.08	0.04	-3.86	1.88	0.57
ZNF184	Q9H0S4	DDX47	1|2	3	1.5	2	0|0|0|0|0|0|0|0|0|0|0|0|0|0|0|0|0|0|0|0|0|0|0|0|3|1|0|0|0|1|0|0|2|0|0|0|0|1|0	0.04	0.08	0.04	0.08	0.04	-3.86	1.88	0.57
ZFP28	Q9H0S4	DDX47	1|1	2	1	2	0|0|0|0|0|0|0|0|0|0|0|0|0|0|0|0|0|0|0|0|0|0|0|0|3|1|0|0|0|1|0|0|2|0|0|0|0|1|0	0	0	0	0	0	-3.86	1.25	0.88
ZBTB6	Q9H0S4	DDX47	2|1	3	1.5	2	0|0|0|0|0|0|0|0|0|0|0|0|0|0|0|0|0|0|0|0|0|0|0|0|3|1|0|0|0|1|0|0|2|0|0|0|0|1|0	0.04	0.08	0.04	0.08	0.04	-3.86	1.88	0.57
ZNF189	Q9H0S4	DDX47	3|3	6	3	2	0|0|0|0|0|0|0|0|0|0|0|0|0|0|0|0|0|0|0|0|0|0|0|0|3|1|0|0|0|1|0|0|2|0|0|0|0|1|0	0.22	0.22	0.22	0.22	0.22	-1.25	3.75	0.42
OSR2	Q9H0S4	DDX47	1|0	1	0.5	2	0|0|0|0|0|0|0|0|0|0|0|0|0|0|0|0|0|0|0|0|0|0|0|0|3|1|0|0|0|1|0|0|2|0|0|0|0|1|0	0	0	0	0	0	-5.54	0.62	0.88
ZFP82	Q9H0S4	DDX47	4|4	8	4	2	0|0|0|0|0|0|0|0|0|0|0|0|0|0|0|0|0|0|0|0|0|0|0|0|3|1|0|0|0|1|0|0|2|0|0|0|0|1|0	0.45	0.45	0.45	0.45	0.45	-0.22	5	0.27
ZNF610	Q9H0S4	DDX47	1|2	3	1.5	2	0|0|0|0|0|0|0|0|0|0|0|0|0|0|0|0|0|0|0|0|0|0|0|0|3|1|0|0|0|1|0|0|2|0|0|0|0|1|0	0.04	0.08	0.04	0.08	0.04	-3.86	1.88	0.57
ZNF549	Q9H0S4	DDX47	0|1	1	0.5	2	0|0|0|0|0|0|0|0|0|0|0|0|0|0|0|0|0|0|0|0|0|0|0|0|3|1|0|0|0|1|0|0|2|0|0|0|0|1|0	0	0	0	0	0	-5.54	0.62	0.88
ZNF449	Q9H0S4	DDX47	1|0	1	0.5	2	0|0|0|0|0|0|0|0|0|0|0|0|0|0|0|0|0|0|0|0|0|0|0|0|3|1|0|0|0|1|0|0|2|0|0|0|0|1|0	0	0	0	0	0	-5.54	0.62	0.88
GTF3A	Q9H0S4	DDX47	1|2	3	1.5	2	0|0|0|0|0|0|0|0|0|0|0|0|0|0|0|0|0|0|0|0|0|0|0|0|3|1|0|0|0|1|0|0|2|0|0|0|0|1|0	0.04	0.08	0.04	0.08	0.04	-3.86	1.88	0.57
ZBTB42	Q9H0S4	DDX47	3|0	3	1.5	2	0|0|0|0|0|0|0|0|0|0|0|0|0|0|0|0|0|0|0|0|0|0|0|0|3|1|0|0|0|1|0|0|2|0|0|0|0|1|0	0.11	0.22	0.11	0.22	0.11	-5.54	1.88	0.49
ZNF778	Q9H0S4	DDX47	2|0	2	1	2	0|0|0|0|0|0|0|0|0|0|0|0|0|0|0|0|0|0|0|0|0|0|0|0|3|1|0|0|0|1|0|0|2|0|0|0|0|1|0	0.04	0.08	0.04	0.08	0.04	-5.54	1.25	0.57
ZNF563	Q9H0S4	DDX47	1|2	3	1.5	2	0|0|0|0|0|0|0|0|0|0|0|0|0|0|0|0|0|0|0|0|0|0|0|0|3|1|0|0|0|1|0|0|2|0|0|0|0|1|0	0.04	0.08	0.04	0.08	0.04	-3.86	1.88	0.57
ZNF770	Q9H0S4	DDX47	1|2	3	1.5	2	0|0|0|0|0|0|0|0|0|0|0|0|0|0|0|0|0|0|0|0|0|0|0|0|3|1|0|0|0|1|0|0|2|0|0|0|0|1|0	0.04	0.08	0.04	0.08	0.04	-3.86	1.88	0.57
ZIM3	Q9Y305	ACOT9	1|0	1	0.5	2	0|0|0|0|0|0|0|0|0|0|0|0|0|0|0|0|0|0|0|0|0|0|0|0|0|0|0|0|0|0|0|0|0|0|0|0|0|0|0	0	0	0	0	0	-3	5	0.88
ZNF189	Q9Y305	ACOT9	1|1	2	1	2	0|0|0|0|0|0|0|0|0|0|0|0|0|0|0|0|0|0|0|0|0|0|0|0|0|0|0|0|0|0|0|0|0|0|0|0|0|0|0	0	0	0	0	0	-0.49	10	0.88
ZBTB14	Q9Y305	ACOT9	1|0	1	0.5	2	0|0|0|0|0|0|0|0|0|0|0|0|0|0|0|0|0|0|0|0|0|0|0|0|0|0|0|0|0|0|0|0|0|0|0|0|0|0|0	0	0	0	0	0	-3	5	0.88
ZNF708	P35244	RPA3	2|1	3	1.5	2	0|0|0|0|0|0|0|0|0|0|0|0|0|0|0|0|0|0|0|0|1|0|0|0|0|0|0|0|0|0|0|0|0|0|1|0|0|0|0	0.25	0.5	0.25	0.5	0.25	-1.75	7.5	0.39
ZNF594	P35244	RPA3	2|0	2	1	2	0|0|0|0|0|0|0|0|0|0|0|0|0|0|0|0|0|0|0|0|1|0|0|0|0|0|0|0|0|0|0|0|0|0|1|0|0|0|0	0.25	0.5	0.25	0.5	0.25	-3.36	5	0.39
ZNF322	P35244	RPA3	3|4	7	3.5	2	0|0|0|0|0|0|0|0|0|0|0|0|0|0|0|0|0|0|0|0|1|0|0|0|0|0|0|0|0|0|0|0|0|0|1|0|0|0|0	0.91	0.97	0.91	0.97	0.91	1.71	17.5	0.02
MAZ	P35244	RPA3	0|3	3	1.5	2	0|0|0|0|0|0|0|0|0|0|0|0|0|0|0|0|0|0|0|0|1|0|0|0|0|0|0|0|0|0|0|0|0|0|1|0|0|0|0	0.42	0.85	0.42	0.85	0.42	-3.36	7.5	0.28
OSR2	P35244	RPA3	0|2	2	1	2	0|0|0|0|0|0|0|0|0|0|0|0|0|0|0|0|0|0|0|0|1|0|0|0|0|0|0|0|0|0|0|0|0|0|1|0|0|0|0	0.25	0.5	0.25	0.5	0.25	-3.36	5	0.39
ZNF331	P35244	RPA3	0|1	1	0.5	2	0|0|0|0|0|0|0|0|0|0|0|0|0|0|0|0|0|0|0|0|1|0|0|0|0|0|0|0|0|0|0|0|0|0|1|0|0|0|0	0	0	0	0	0	-3.36	2.5	0.88
SCRT1	P35244	RPA3	2|0	2	1	2	0|0|0|0|0|0|0|0|0|0|0|0|0|0|0|0|0|0|0|0|1|0|0|0|0|0|0|0|0|0|0|0|0|0|1|0|0|0|0	0.25	0.5	0.25	0.5	0.25	-3.36	5	0.39
KLF1	P35244	RPA3	3|0	3	1.5	2	0|0|0|0|0|0|0|0|0|0|0|0|0|0|0|0|0|0|0|0|1|0|0|0|0|0|0|0|0|0|0|0|0|0|1|0|0|0|0	0.42	0.85	0.42	0.85	0.42	-3.36	7.5	0.28
IKZF3	P35244	RPA3	2|0	2	1	2	0|0|0|0|0|0|0|0|0|0|0|0|0|0|0|0|0|0|0|0|1|0|0|0|0|0|0|0|0|0|0|0|0|0|1|0|0|0|0	0.25	0.5	0.25	0.5	0.25	-3.36	5	0.39
ZSCAN30	P35244	RPA3	1|2	3	1.5	2	0|0|0|0|0|0|0|0|0|0|0|0|0|0|0|0|0|0|0|0|1|0|0|0|0|0|0|0|0|0|0|0|0|0|1|0|0|0|0	0.25	0.5	0.25	0.5	0.25	-1.75	7.5	0.39
ZNF214	P39023	RPL3	1|0	1	0.5	2	0|0|0|0|0|0|0|0|0|0|0|0|0|0|0|0|0|0|0|0|0|0|0|0|0|0|0|3|0|4|0|6|13|6|10|0|2|28|15	0	0	0	0	0	-38.83	0.06	0.88
ZNF331	P39023	RPL3	2|2	4	2	2	0|0|0|0|0|0|0|0|0|0|0|0|0|0|0|0|0|0|0|0|0|0|0|0|0|0|0|3|0|4|0|6|13|6|10|0|2|28|15	0	0	0	0	0	-32.38	0.23	0.88
ZNF257	P39023	RPL3	2|1	3	1.5	2	0|0|0|0|0|0|0|0|0|0|0|0|0|0|0|0|0|0|0|0|0|0|0|0|0|0|0|3|0|4|0|6|13|6|10|0|2|28|15	0	0	0	0	0	-35.26	0.17	0.88
ZNF34	P39023	RPL3	0|1	1	0.5	2	0|0|0|0|0|0|0|0|0|0|0|0|0|0|0|0|0|0|0|0|0|0|0|0|0|0|0|3|0|4|0|6|13|6|10|0|2|28|15	0	0	0	0	0	-38.83	0.06	0.88
ZNF18	P39023	RPL3	1|1	2	1	2	0|0|0|0|0|0|0|0|0|0|0|0|0|0|0|0|0|0|0|0|0|0|0|0|0|0|0|3|0|4|0|6|13|6|10|0|2|28|15	0	0	0	0	0	-35.26	0.11	0.88
ZNF595	P39023	RPL3	1|1	2	1	2	0|0|0|0|0|0|0|0|0|0|0|0|0|0|0|0|0|0|0|0|0|0|0|0|0|0|0|3|0|4|0|6|13|6|10|0|2|28|15	0	0	0	0	0	-35.26	0.11	0.88
ZNF16	P39023	RPL3	3|1	4	2	2	0|0|0|0|0|0|0|0|0|0|0|0|0|0|0|0|0|0|0|0|0|0|0|0|0|0|0|3|0|4|0|6|13|6|10|0|2|28|15	0	0	0	0	0	-35.26	0.23	0.86
ZNF71	P39023	RPL3	3|4	7	3.5	2	0|0|0|0|0|0|0|0|0|0|0|0|0|0|0|0|0|0|0|0|0|0|0|0|0|0|0|3|0|4|0|6|13|6|10|0|2|28|15	0	0	0	0	0	-29.9	0.4	0.86
ZNF816	P39023	RPL3	0|1	1	0.5	2	0|0|0|0|0|0|0|0|0|0|0|0|0|0|0|0|0|0|0|0|0|0|0|0|0|0|0|3|0|4|0|6|13|6|10|0|2|28|15	0	0	0	0	0	-38.83	0.06	0.88
ZNF320	P39023	RPL3	1|0	1	0.5	2	0|0|0|0|0|0|0|0|0|0|0|0|0|0|0|0|0|0|0|0|0|0|0|0|0|0|0|3|0|4|0|6|13|6|10|0|2|28|15	0	0	0	0	0	-38.83	0.06	0.88
ZNF140	P39023	RPL3	2|0	2	1	2	0|0|0|0|0|0|0|0|0|0|0|0|0|0|0|0|0|0|0|0|0|0|0|0|0|0|0|3|0|4|0|6|13|6|10|0|2|28|15	0	0	0	0	0	-38.83	0.11	0.88
ZNF708	P39023	RPL3	0|1	1	0.5	2	0|0|0|0|0|0|0|0|0|0|0|0|0|0|0|0|0|0|0|0|0|0|0|0|0|0|0|3|0|4|0|6|13|6|10|0|2|28|15	0	0	0	0	0	-38.83	0.06	0.88
FEZF1	P39023	RPL3	1|2	3	1.5	2	0|0|0|0|0|0|0|0|0|0|0|0|0|0|0|0|0|0|0|0|0|0|0|0|0|0|0|3|0|4|0|6|13|6|10|0|2|28|15	0	0	0	0	0	-35.26	0.17	0.88
ZBTB14	P39023	RPL3	1|0	1	0.5	2	0|0|0|0|0|0|0|0|0|0|0|0|0|0|0|0|0|0|0|0|0|0|0|0|0|0|0|3|0|4|0|6|13|6|10|0|2|28|15	0	0	0	0	0	-38.83	0.06	0.88
ZNF8	P39023	RPL3	2|1	3	1.5	2	0|0|0|0|0|0|0|0|0|0|0|0|0|0|0|0|0|0|0|0|0|0|0|0|0|0|0|3|0|4|0|6|13|6|10|0|2|28|15	0	0	0	0	0	-35.26	0.17	0.88
ZNF669	P39023	RPL3	0|2	2	1	2	0|0|0|0|0|0|0|0|0|0|0|0|0|0|0|0|0|0|0|0|0|0|0|0|0|0|0|3|0|4|0|6|13|6|10|0|2|28|15	0	0	0	0	0	-38.83	0.11	0.88
ZNF436	P39023	RPL3	2|6	8	4	2	0|0|0|0|0|0|0|0|0|0|0|0|0|0|0|0|0|0|0|0|0|0|0|0|0|0|0|3|0|4|0|6|13|6|10|0|2|28|15	0	0	0	0	0	-32.38	0.46	0.85
ZNF768	P39023	RPL3	8|4	12	6	2	0|0|0|0|0|0|0|0|0|0|0|0|0|0|0|0|0|0|0|0|0|0|0|0|0|0|0|3|0|4|0|6|13|6|10|0|2|28|15	0	0	0	0	0	-27.71	0.69	0.85
ZNF419	P39023	RPL3	1|0	1	0.5	2	0|0|0|0|0|0|0|0|0|0|0|0|0|0|0|0|0|0|0|0|0|0|0|0|0|0|0|3|0|4|0|6|13|6|10|0|2|28|15	0	0	0	0	0	-38.83	0.06	0.88
ZNF418	P39023	RPL3	1|2	3	1.5	2	0|0|0|0|0|0|0|0|0|0|0|0|0|0|0|0|0|0|0|0|0|0|0|0|0|0|0|3|0|4|0|6|13|6|10|0|2|28|15	0	0	0	0	0	-35.26	0.17	0.88
ZNF513	P39023	RPL3	1|1	2	1	2	0|0|0|0|0|0|0|0|0|0|0|0|0|0|0|0|0|0|0|0|0|0|0|0|0|0|0|3|0|4|0|6|13|6|10|0|2|28|15	0	0	0	0	0	-35.26	0.11	0.88
ZNF667	P39023	RPL3	2|1	3	1.5	2	0|0|0|0|0|0|0|0|0|0|0|0|0|0|0|0|0|0|0|0|0|0|0|0|0|0|0|3|0|4|0|6|13|6|10|0|2|28|15	0	0	0	0	0	-35.26	0.17	0.88
ZNF184	P39023	RPL3	0|1	1	0.5	2	0|0|0|0|0|0|0|0|0|0|0|0|0|0|0|0|0|0|0|0|0|0|0|0|0|0|0|3|0|4|0|6|13|6|10|0|2|28|15	0	0	0	0	0	-38.83	0.06	0.88
ZFP28	P39023	RPL3	2|2	4	2	2	0|0|0|0|0|0|0|0|0|0|0|0|0|0|0|0|0|0|0|0|0|0|0|0|0|0|0|3|0|4|0|6|13|6|10|0|2|28|15	0	0	0	0	0	-32.38	0.23	0.88
ZBTB6	P39023	RPL3	2|0	2	1	2	0|0|0|0|0|0|0|0|0|0|0|0|0|0|0|0|0|0|0|0|0|0|0|0|0|0|0|3|0|4|0|6|13|6|10|0|2|28|15	0	0	0	0	0	-38.83	0.11	0.88
ZNF189	P39023	RPL3	1|1	2	1	2	0|0|0|0|0|0|0|0|0|0|0|0|0|0|0|0|0|0|0|0|0|0|0|0|0|0|0|3|0|4|0|6|13|6|10|0|2|28|15	0	0	0	0	0	-35.26	0.11	0.88
ZNF329	P39023	RPL3	2|2	4	2	2	0|0|0|0|0|0|0|0|0|0|0|0|0|0|0|0|0|0|0|0|0|0|0|0|0|0|0|3|0|4|0|6|13|6|10|0|2|28|15	0	0	0	0	0	-32.38	0.23	0.88
OSR2	P39023	RPL3	0|1	1	0.5	2	0|0|0|0|0|0|0|0|0|0|0|0|0|0|0|0|0|0|0|0|0|0|0|0|0|0|0|3|0|4|0|6|13|6|10|0|2|28|15	0	0	0	0	0	-38.83	0.06	0.88
ZNF582	P39023	RPL3	2|2	4	2	2	0|0|0|0|0|0|0|0|0|0|0|0|0|0|0|0|0|0|0|0|0|0|0|0|0|0|0|3|0|4|0|6|13|6|10|0|2|28|15	0	0	0	0	0	-32.38	0.23	0.88
ZFP82	P39023	RPL3	4|7	11	5.5	2	0|0|0|0|0|0|0|0|0|0|0|0|0|0|0|0|0|0|0|0|0|0|0|0|0|0|0|3|0|4|0|6|13|6|10|0|2|28|15	0	0	0	0	0	-27.71	0.63	0.85
PATZ1	P39023	RPL3	2|2	4	2	2	0|0|0|0|0|0|0|0|0|0|0|0|0|0|0|0|0|0|0|0|0|0|0|0|0|0|0|3|0|4|0|6|13|6|10|0|2|28|15	0	0	0	0	0	-32.38	0.23	0.88
KLF1	P39023	RPL3	0|1	1	0.5	2	0|0|0|0|0|0|0|0|0|0|0|0|0|0|0|0|0|0|0|0|0|0|0|0|0|0|0|3|0|4|0|6|13|6|10|0|2|28|15	0	0	0	0	0	-38.83	0.06	0.88
ZNF610	P39023	RPL3	1|0	1	0.5	2	0|0|0|0|0|0|0|0|0|0|0|0|0|0|0|0|0|0|0|0|0|0|0|0|0|0|0|3|0|4|0|6|13|6|10|0|2|28|15	0	0	0	0	0	-38.83	0.06	0.88
ZNF324	P39023	RPL3	1|1	2	1	2	0|0|0|0|0|0|0|0|0|0|0|0|0|0|0|0|0|0|0|0|0|0|0|0|0|0|0|3|0|4|0|6|13|6|10|0|2|28|15	0	0	0	0	0	-35.26	0.11	0.88
ZNF549	P39023	RPL3	0|1	1	0.5	2	0|0|0|0|0|0|0|0|0|0|0|0|0|0|0|0|0|0|0|0|0|0|0|0|0|0|0|3|0|4|0|6|13|6|10|0|2|28|15	0	0	0	0	0	-38.83	0.06	0.88
MAZ	P39023	RPL3	1|0	1	0.5	2	0|0|0|0|0|0|0|0|0|0|0|0|0|0|0|0|0|0|0|0|0|0|0|0|0|0|0|3|0|4|0|6|13|6|10|0|2|28|15	0	0	0	0	0	-38.83	0.06	0.88
ZNF449	P39023	RPL3	3|0	3	1.5	2	0|0|0|0|0|0|0|0|0|0|0|0|0|0|0|0|0|0|0|0|0|0|0|0|0|0|0|3|0|4|0|6|13|6|10|0|2|28|15	0	0	0	0	0	-38.83	0.17	0.86
GTF3A	P39023	RPL3	1|1	2	1	2	0|0|0|0|0|0|0|0|0|0|0|0|0|0|0|0|0|0|0|0|0|0|0|0|0|0|0|3|0|4|0|6|13|6|10|0|2|28|15	0	0	0	0	0	-35.26	0.11	0.88
ZBTB42	P39023	RPL3	2|2	4	2	2	0|0|0|0|0|0|0|0|0|0|0|0|0|0|0|0|0|0|0|0|0|0|0|0|0|0|0|3|0|4|0|6|13|6|10|0|2|28|15	0	0	0	0	0	-32.38	0.23	0.88
PRDM1	P39023	RPL3	0|5	5	2.5	2	0|0|0|0|0|0|0|0|0|0|0|0|0|0|0|0|0|0|0|0|0|0|0|0|0|0|0|3|0|4|0|6|13|6|10|0|2|28|15	0	0	0	0	0	-38.83	0.29	0.86
ZNF778	P39023	RPL3	2|2	4	2	2	0|0|0|0|0|0|0|0|0|0|0|0|0|0|0|0|0|0|0|0|0|0|0|0|0|0|0|3|0|4|0|6|13|6|10|0|2|28|15	0	0	0	0	0	-32.38	0.23	0.88
ZNF37A	P39023	RPL3	0|1	1	0.5	2	0|0|0|0|0|0|0|0|0|0|0|0|0|0|0|0|0|0|0|0|0|0|0|0|0|0|0|3|0|4|0|6|13|6|10|0|2|28|15	0	0	0	0	0	-38.83	0.06	0.88
ZNF563	P39023	RPL3	2|2	4	2	2	0|0|0|0|0|0|0|0|0|0|0|0|0|0|0|0|0|0|0|0|0|0|0|0|0|0|0|3|0|4|0|6|13|6|10|0|2|28|15	0	0	0	0	0	-32.38	0.23	0.88
ZNF770	P39023	RPL3	1|2	3	1.5	2	0|0|0|0|0|0|0|0|0|0|0|0|0|0|0|0|0|0|0|0|0|0|0|0|0|0|0|3|0|4|0|6|13|6|10|0|2|28|15	0	0	0	0	0	-35.26	0.17	0.88
FEZF1	O75436	VPS26A	1|0	1	0.5	2	0|0|0|0|0|0|0|0|0|0|0|0|0|0|0|0|0|0|0|0|0|0|0|0|0|0|0|0|0|0|2|0|0|0|0|0|0|0|0	0	0	0	0	0	-3.39	2.5	0.88
ZNF594	O75436	VPS26A	0|2	2	1	2	0|0|0|0|0|0|0|0|0|0|0|0|0|0|0|0|0|0|0|0|0|0|0|0|0|0|0|0|0|0|2|0|0|0|0|0|0|0|0	0.24	0.49	0.24	0.49	0.24	-3.39	5	0.4
ZSCAN30	O75436	VPS26A	0|1	1	0.5	2	0|0|0|0|0|0|0|0|0|0|0|0|0|0|0|0|0|0|0|0|0|0|0|0|0|0|0|0|0|0|2|0|0|0|0|0|0|0|0	0	0	0	0	0	-3.39	2.5	0.88
ZFP28	O75437	ZNF254	1|1	2	1	2	0|0|0|0|0|0|0|0|0|0|0|0|0|0|0|0|0|0|0|0|0|0|0|0|0|0|0|0|0|0|0|0|0|0|0|0|0|0|0	0	0	0	0	0	-0.49	10	0.88
ZNF816	O75437	ZNF254	1|2	3	1.5	2	0|0|0|0|0|0|0|0|0|0|0|0|0|0|0|0|0|0|0|0|0|0|0|0|0|0|0|0|0|0|0|0|0|0|0|0|0|0|0	0.41	0.82	0.41	0.82	0.41	-0.49	15	0.28
ZNF418	O75437	ZNF254	1|0	1	0.5	2	0|0|0|0|0|0|0|0|0|0|0|0|0|0|0|0|0|0|0|0|0|0|0|0|0|0|0|0|0|0|0|0|0|0|0|0|0|0|0	0	0	0	0	0	-3	5	0.88
PATZ1	Q96AC6	KIFC2	0|3	3	1.5	2	0|0|0|0|0|0|0|1|0|0|0|0|0|0|0|0|0|0|0|0|0|0|0|0|0|0|0|0|0|0|0|0|0|0|0|0|0|0|0	0.5	1	0.5	1	0.5	-2.99	15	0.16
ZNF549	Q96AC6	KIFC2	0|1	1	0.5	2	0|0|0|0|0|0|0|1|0|0|0|0|0|0|0|0|0|0|0|0|0|0|0|0|0|0|0|0|0|0|0|0|0|0|0|0|0|0|0	0	0	0	0	0	-2.99	5	0.88
KLF1	O75439	PMPCB	1|0	1	0.5	2	0|2|0|0|0|0|0|0|0|0|0|0|0|0|0|0|0|0|0|0|0|0|0|0|0|0|0|0|0|2|0|0|3|0|1|0|0|0|0	0	0	0	0	0	-5.61	0.62	0.88
FEZF1	P35249	RFC4	2|0	2	1	2	0|0|0|0|0|0|0|0|0|0|0|0|0|0|0|0|0|0|0|0|0|0|0|0|0|0|0|0|0|1|1|0|0|0|0|0|0|0|1	0.18	0.36	0.18	0.36	0.18	-3.72	3.33	0.44
ZNF322	P35249	RFC4	0|1	1	0.5	2	0|0|0|0|0|0|0|0|0|0|0|0|0|0|0|0|0|0|0|0|0|0|0|0|0|0|0|0|0|1|1|0|0|0|0|0|0|0|1	0	0	0	0	0	-3.72	1.67	0.88
OSR2	P35249	RFC4	0|1	1	0.5	2	0|0|0|0|0|0|0|0|0|0|0|0|0|0|0|0|0|0|0|0|0|0|0|0|0|0|0|0|0|1|1|0|0|0|0|0|0|0|1	0	0	0	0	0	-3.72	1.67	0.88
GTF3A	P35249	RFC4	1|2	3	1.5	2	0|0|0|0|0|0|0|0|0|0|0|0|0|0|0|0|0|0|0|0|0|0|0|0|0|0|0|0|0|1|1|0|0|0|0|0|0|0|1	0.18	0.36	0.18	0.36	0.18	-2.11	5	0.44
ZBTB42	P35249	RFC4	1|0	1	0.5	2	0|0|0|0|0|0|0|0|0|0|0|0|0|0|0|0|0|0|0|0|0|0|0|0|0|0|0|0|0|1|1|0|0|0|0|0|0|0|1	0	0	0	0	0	-3.72	1.67	0.88
SCRT1	P35249	RFC4	1|0	1	0.5	2	0|0|0|0|0|0|0|0|0|0|0|0|0|0|0|0|0|0|0|0|0|0|0|0|0|0|0|0|0|1|1|0|0|0|0|0|0|0|1	0	0	0	0	0	-3.72	1.67	0.88
KLF1	P35249	RFC4	1|0	1	0.5	2	0|0|0|0|0|0|0|0|0|0|0|0|0|0|0|0|0|0|0|0|0|0|0|0|0|0|0|0|0|1|1|0|0|0|0|0|0|0|1	0	0	0	0	0	-3.72	1.67	0.88
PATZ1	P35249	RFC4	0|1	1	0.5	2	0|0|0|0|0|0|0|0|0|0|0|0|0|0|0|0|0|0|0|0|0|0|0|0|0|0|0|0|0|1|1|0|0|0|0|0|0|0|1	0	0	0	0	0	-3.72	1.67	0.88
ZNF778	P43034	PAFAH1B1	1|0	1	0.5	2	0|1|0|0|0|0|0|0|0|0|0|0|0|0|0|0|0|0|0|0|1|0|0|0|0|2|3|0|0|0|0|1|3|1|1|0|0|0|0	0	0	0	0	0	-7.37	0.38	0.88
ZNF322	P43034	PAFAH1B1	1|2	3	1.5	2	0|1|0|0|0|0|0|0|0|0|0|0|0|0|0|0|0|0|0|0|1|0|0|0|0|2|3|0|0|0|0|1|3|1|1|0|0|0|0	0.01	0.01	0.01	0.01	0.01	-5.71	1.15	0.65
ZNF322	P08621	SNRNP70	0|4	4	2	2	0|1|0|0|0|0|0|0|0|0|0|0|0|0|0|0|0|0|0|0|0|0|0|0|0|0|0|0|0|2|0|0|1|0|1|0|0|2|3	0.19	0.38	0.19	0.38	0.19	-6.08	2	0.43
ZNF594	P08621	SNRNP70	1|0	1	0.5	2	0|1|0|0|0|0|0|0|0|0|0|0|0|0|0|0|0|0|0|0|0|0|0|0|0|0|0|0|0|2|0|0|1|0|1|0|0|2|3	0	0	0	0	0	-6.08	0.5	0.88
KLF1	P08621	SNRNP70	1|0	1	0.5	2	0|1|0|0|0|0|0|0|0|0|0|0|0|0|0|0|0|0|0|0|0|0|0|0|0|0|0|0|0|2|0|0|1|0|1|0|0|2|3	0	0	0	0	0	-6.08	0.5	0.88
MAZ	P08621	SNRNP70	0|2	2	1	2	0|1|0|0|0|0|0|0|0|0|0|0|0|0|0|0|0|0|0|0|0|0|0|0|0|0|0|0|0|2|0|0|1|0|1|0|0|2|3	0.02	0.04	0.02	0.04	0.02	-6.08	1	0.61
ZNF778	P08621	SNRNP70	0|1	1	0.5	2	0|1|0|0|0|0|0|0|0|0|0|0|0|0|0|0|0|0|0|0|0|0|0|0|0|0|0|0|0|2|0|0|1|0|1|0|0|2|3	0	0	0	0	0	-6.08	0.5	0.88
ZNF418	P08621	SNRNP70	1|0	1	0.5	2	0|1|0|0|0|0|0|0|0|0|0|0|0|0|0|0|0|0|0|0|0|0|0|0|0|0|0|0|0|2|0|0|1|0|1|0|0|2|3	0	0	0	0	0	-6.08	0.5	0.88
ZNF816	P08621	SNRNP70	0|1	1	0.5	2	0|1|0|0|0|0|0|0|0|0|0|0|0|0|0|0|0|0|0|0|0|0|0|0|0|0|0|0|0|2|0|0|1|0|1|0|0|2|3	0	0	0	0	0	-6.08	0.5	0.88
IKZF3	P08621	SNRNP70	1|0	1	0.5	2	0|1|0|0|0|0|0|0|0|0|0|0|0|0|0|0|0|0|0|0|0|0|0|0|0|0|0|0|0|2|0|0|1|0|1|0|0|2|3	0	0	0	0	0	-6.08	0.5	0.88
ZNF214	Q9NVP1	DDX18	3|1	4	2	2	0|5|0|0|0|0|0|0|0|0|0|0|0|0|0|0|0|0|0|1|3|0|0|0|7|4|4|4|0|3|0|1|4|1|1|0|0|0|0	0	0	0	0	0	-14.52	0.56	0.78
IKZF3	Q9NVP1	DDX18	0|8	8	4	2	0|5|0|0|0|0|0|0|0|0|0|0|0|0|0|0|0|0|0|1|3|0|0|0|7|4|4|4|0|3|0|1|4|1|1|0|0|0|0	0.01	0.02	0.01	0.02	0.01	-17.21	1.11	0.64
ZNF250	Q9NVP1	DDX18	7|5	12	6	2	0|5|0|0|0|0|0|0|0|0|0|0|0|0|0|0|0|0|0|1|3|0|0|0|7|4|4|4|0|3|0|1|4|1|1|0|0|0|0	0	0.01	0	0.01	0	-8	1.67	0.68
ZNF692	Q9NVP1	DDX18	0|3	3	1.5	2	0|5|0|0|0|0|0|0|0|0|0|0|0|0|0|0|0|0|0|1|3|0|0|0|7|4|4|4|0|3|0|1|4|1|1|0|0|0|0	0	0	0	0	0	-17.21	0.42	0.78
SCRT1	Q9NVP1	DDX18	6|3	9	4.5	2	0|5|0|0|0|0|0|0|0|0|0|0|0|0|0|0|0|0|0|1|3|0|0|0|7|4|4|4|0|3|0|1|4|1|1|0|0|0|0	0	0	0	0	0	-10.91	1.25	0.72
ZNF594	Q9NVP1	DDX18	3|10	13	6.5	2	0|5|0|0|0|0|0|0|0|0|0|0|0|0|0|0|0|0|0|1|3|0|0|0|7|4|4|4|0|3|0|1|4|1|1|0|0|0|0	0.1	0.2	0.1	0.2	0.1	-10.91	1.81	0.5
ZNF595	Q9NVP1	DDX18	3|5	8	4	2	0|5|0|0|0|0|0|0|0|0|0|0|0|0|0|0|0|0|0|1|3|0|0|0|7|4|4|4|0|3|0|1|4|1|1|0|0|0|0	0	0	0	0	0	-10.91	1.11	0.74
ZNF16	Q9NVP1	DDX18	7|6	13	6.5	2	0|5|0|0|0|0|0|0|0|0|0|0|0|0|0|0|0|0|0|1|3|0|0|0|7|4|4|4|0|3|0|1|4|1|1|0|0|0|0	0	0.01	0	0.01	0	-6.61	1.81	0.68
ZNF71	Q9NVP1	DDX18	9|11	20	10	2	0|5|0|0|0|0|0|0|0|0|0|0|0|0|0|0|0|0|0|1|3|0|0|0|7|4|4|4|0|3|0|1|4|1|1|0|0|0|0	0.26	0.46	0.26	0.46	0.26	-2.64	2.78	0.38
ZNF816	Q9NVP1	DDX18	0|5	5	2.5	2	0|5|0|0|0|0|0|0|0|0|0|0|0|0|0|0|0|0|0|1|3|0|0|0|7|4|4|4|0|3|0|1|4|1|1|0|0|0|0	0	0	0	0	0	-17.21	0.69	0.74
ZSCAN5C	Q9NVP1	DDX18	6|5	11	5.5	2	0|5|0|0|0|0|0|0|0|0|0|0|0|0|0|0|0|0|0|1|3|0|0|0|7|4|4|4|0|3|0|1|4|1|1|0|0|0|0	0	0	0	0	0	-8	1.53	0.71
ZNF320	Q9NVP1	DDX18	2|3	5	2.5	2	0|5|0|0|0|0|0|0|0|0|0|0|0|0|0|0|0|0|0|1|3|0|0|0|7|4|4|4|0|3|0|1|4|1|1|0|0|0|0	0	0	0	0	0	-12.52	0.69	0.78
ZNF140	Q9NVP1	DDX18	6|0	6	3	2	0|5|0|0|0|0|0|0|0|0|0|0|0|0|0|0|0|0|0|1|3|0|0|0|7|4|4|4|0|3|0|1|4|1|1|0|0|0|0	0	0	0	0	0	-17.21	0.83	0.72
ZNF708	Q9NVP1	DDX18	6|7	13	6.5	2	0|5|0|0|0|0|0|0|0|0|0|0|0|0|0|0|0|0|0|1|3|0|0|0|7|4|4|4|0|3|0|1|4|1|1|0|0|0|0	0	0.01	0	0.01	0	-6.61	1.81	0.68
FEZF1	Q9NVP1	DDX18	5|11	16	8	2	0|5|0|0|0|0|0|0|0|0|0|0|0|0|0|0|0|0|0|1|3|0|0|0|7|4|4|4|0|3|0|1|4|1|1|0|0|0|0	0.23	0.46	0.23	0.46	0.23	-8	2.22	0.41
ZBTB14	Q9NVP1	DDX18	2|0	2	1	2	0|5|0|0|0|0|0|0|0|0|0|0|0|0|0|0|0|0|0|1|3|0|0|0|7|4|4|4|0|3|0|1|4|1|1|0|0|0|0	0	0	0	0	0	-17.21	0.28	0.8
ZNF547	Q9NVP1	DDX18	3|1	4	2	2	0|5|0|0|0|0|0|0|0|0|0|0|0|0|0|0|0|0|0|1|3|0|0|0|7|4|4|4|0|3|0|1|4|1|1|0|0|0|0	0	0	0	0	0	-14.52	0.56	0.78
ZFP3	Q9NVP1	DDX18	0|1	1	0.5	2	0|5|0|0|0|0|0|0|0|0|0|0|0|0|0|0|0|0|0|1|3|0|0|0|7|4|4|4|0|3|0|1|4|1|1|0|0|0|0	0	0	0	0	0	-17.21	0.14	0.88
KLF7	Q9NVP1	DDX18	5|2	7	3.5	2	0|5|0|0|0|0|0|0|0|0|0|0|0|0|0|0|0|0|0|1|3|0|0|0|7|4|4|4|0|3|0|1|4|1|1|0|0|0|0	0	0	0	0	0	-12.52	0.97	0.74
ZNF436	Q9NVP1	DDX18	4|19	23	11.5	2	0|5|0|0|0|0|0|0|0|0|0|0|0|0|0|0|0|0|0|1|3|0|0|0|7|4|4|4|0|3|0|1|4|1|1|0|0|0|0	0.5	1	0.5	1	0.5	-9.43	3.19	0.15
ZNF768	Q9NVP1	DDX18	16|16	32	16	2	0|5|0|0|0|0|0|0|0|0|0|0|0|0|0|0|0|0|0|1|3|0|0|0|7|4|4|4|0|3|0|1|4|1|1|0|0|0|0	1	1	1	1	1	5.55	4.44	0
ZNF419	Q9NVP1	DDX18	4|6	10	5	2	0|5|0|0|0|0|0|0|0|0|0|0|0|0|0|0|0|0|0|1|3|0|0|0|7|4|4|4|0|3|0|1|4|1|1|0|0|0|0	0	0	0	0	0	-9.43	1.39	0.71
ZNF418	Q9NVP1	DDX18	0|1	1	0.5	2	0|5|0|0|0|0|0|0|0|0|0|0|0|0|0|0|0|0|0|1|3|0|0|0|7|4|4|4|0|3|0|1|4|1|1|0|0|0|0	0	0	0	0	0	-17.21	0.14	0.88
ZNF513	Q9NVP1	DDX18	1|3	4	2	2	0|5|0|0|0|0|0|0|0|0|0|0|0|0|0|0|0|0|0|1|3|0|0|0|7|4|4|4|0|3|0|1|4|1|1|0|0|0|0	0	0	0	0	0	-14.52	0.56	0.78
ZNF667	Q9NVP1	DDX18	4|2	6	3	2	0|5|0|0|0|0|0|0|0|0|0|0|0|0|0|0|0|0|0|1|3|0|0|0|7|4|4|4|0|3|0|1|4|1|1|0|0|0|0	0	0	0	0	0	-12.52	0.83	0.76
ZNF184	Q9NVP1	DDX18	8|4	12	6	2	0|5|0|0|0|0|0|0|0|0|0|0|0|0|0|0|0|0|0|1|3|0|0|0|7|4|4|4|0|3|0|1|4|1|1|0|0|0|0	0.01	0.02	0.01	0.02	0.01	-9.43	1.67	0.64
ZFP28	Q9NVP1	DDX18	3|5	8	4	2	0|5|0|0|0|0|0|0|0|0|0|0|0|0|0|0|0|0|0|1|3|0|0|0|7|4|4|4|0|3|0|1|4|1|1|0|0|0|0	0	0	0	0	0	-10.91	1.11	0.74
GLIS1	Q9NVP1	DDX18	3|1	4	2	2	0|5|0|0|0|0|0|0|0|0|0|0|0|0|0|0|0|0|0|1|3|0|0|0|7|4|4|4|0|3|0|1|4|1|1|0|0|0|0	0	0	0	0	0	-14.52	0.56	0.78
KLF1	Q9NVP1	DDX18	5|4	9	4.5	2	0|5|0|0|0|0|0|0|0|0|0|0|0|0|0|0|0|0|0|1|3|0|0|0|7|4|4|4|0|3|0|1|4|1|1|0|0|0|0	0	0	0	0	0	-9.43	1.25	0.74
ZNF322	Q9NVP1	DDX18	4|4	8	4	2	0|5|0|0|0|0|0|0|0|0|0|0|0|0|0|0|0|0|0|1|3|0|0|0|7|4|4|4|0|3|0|1|4|1|1|0|0|0|0	0	0	0	0	0	-9.43	1.11	0.76
ZNF329	Q9NVP1	DDX18	0|9	9	4.5	2	0|5|0|0|0|0|0|0|0|0|0|0|0|0|0|0|0|0|0|1|3|0|0|0|7|4|4|4|0|3|0|1|4|1|1|0|0|0|0	0.03	0.07	0.03	0.07	0.03	-17.21	1.25	0.58
ZNF189	Q9NVP1	DDX18	7|7	14	7	2	0|5|0|0|0|0|0|0|0|0|0|0|0|0|0|0|0|0|0|1|3|0|0|0|7|4|4|4|0|3|0|1|4|1|1|0|0|0|0	0.01	0.01	0.01	0.01	0.01	-5.25	1.94	0.66
ZNF582	Q9NVP1	DDX18	0|1	1	0.5	2	0|5|0|0|0|0|0|0|0|0|0|0|0|0|0|0|0|0|0|1|3|0|0|0|7|4|4|4|0|3|0|1|4|1|1|0|0|0|0	0	0	0	0	0	-17.21	0.14	0.88
MYNN	Q9NVP1	DDX18	4|3	7	3.5	2	0|5|0|0|0|0|0|0|0|0|0|0|0|0|0|0|0|0|0|1|3|0|0|0|7|4|4|4|0|3|0|1|4|1|1|0|0|0|0	0	0	0	0	0	-10.91	0.97	0.76
ZFP82	Q9NVP1	DDX18	8|19	27	13.5	2	0|5|0|0|0|0|0|0|0|0|0|0|0|0|0|0|0|0|0|1|3|0|0|0|7|4|4|4|0|3|0|1|4|1|1|0|0|0|0	0.51	1	0.51	1	0.51	-3.93	3.75	0.13
PATZ1	Q9NVP1	DDX18	4|7	11	5.5	2	0|5|0|0|0|0|0|0|0|0|0|0|0|0|0|0|0|0|0|1|3|0|0|0|7|4|4|4|0|3|0|1|4|1|1|0|0|0|0	0	0.01	0	0.01	0	-9.43	1.53	0.68
ZNF610	Q9NVP1	DDX18	0|2	2	1	2	0|5|0|0|0|0|0|0|0|0|0|0|0|0|0|0|0|0|0|1|3|0|0|0|7|4|4|4|0|3|0|1|4|1|1|0|0|0|0	0	0	0	0	0	-17.21	0.28	0.8
ZNF394	Q9NVP1	DDX18	1|0	1	0.5	2	0|5|0|0|0|0|0|0|0|0|0|0|0|0|0|0|0|0|0|1|3|0|0|0|7|4|4|4|0|3|0|1|4|1|1|0|0|0|0	0	0	0	0	0	-17.21	0.14	0.88
MAZ	Q9NVP1	DDX18	4|0	4	2	2	0|5|0|0|0|0|0|0|0|0|0|0|0|0|0|0|0|0|0|1|3|0|0|0|7|4|4|4|0|3|0|1|4|1|1|0|0|0|0	0	0	0	0	0	-17.21	0.56	0.76
ZNF449	Q9NVP1	DDX18	4|5	9	4.5	2	0|5|0|0|0|0|0|0|0|0|0|0|0|0|0|0|0|0|0|1|3|0|0|0|7|4|4|4|0|3|0|1|4|1|1|0|0|0|0	0	0	0	0	0	-9.43	1.25	0.74
ZNF280A	Q9NVP1	DDX18	2|2	4	2	2	0|5|0|0|0|0|0|0|0|0|0|0|0|0|0|0|0|0|0|1|3|0|0|0|7|4|4|4|0|3|0|1|4|1|1|0|0|0|0	0	0	0	0	0	-12.52	0.56	0.79
GTF3A	Q9NVP1	DDX18	5|3	8	4	2	0|5|0|0|0|0|0|0|0|0|0|0|0|0|0|0|0|0|0|1|3|0|0|0|7|4|4|4|0|3|0|1|4|1|1|0|0|0|0	0	0	0	0	0	-10.91	1.11	0.74
ZBTB42	Q9NVP1	DDX18	5|1	6	3	2	0|5|0|0|0|0|0|0|0|0|0|0|0|0|0|0|0|0|0|1|3|0|0|0|7|4|4|4|0|3|0|1|4|1|1|0|0|0|0	0	0	0	0	0	-14.52	0.83	0.74
PRDM1	Q9NVP1	DDX18	11|18	29	14.5	2	0|5|0|0|0|0|0|0|0|0|0|0|0|0|0|0|0|0|0|1|3|0|0|0|7|4|4|4|0|3|0|1|4|1|1|0|0|0|0	0.73	1	0.73	1	0.73	-0.16	4.03	0.07
ZNF778	Q9NVP1	DDX18	4|3	7	3.5	2	0|5|0|0|0|0|0|0|0|0|0|0|0|0|0|0|0|0|0|1|3|0|0|0|7|4|4|4|0|3|0|1|4|1|1|0|0|0|0	0	0	0	0	0	-10.91	0.97	0.76
ZNF596	Q9NVP1	DDX18	6|9	15	7.5	2	0|5|0|0|0|0|0|0|0|0|0|0|0|0|0|0|0|0|0|1|3|0|0|0|7|4|4|4|0|3|0|1|4|1|1|0|0|0|0	0.03	0.07	0.03	0.07	0.03	-6.61	2.08	0.58
ZIM3	Q9NVP1	DDX18	2|0	2	1	2	0|5|0|0|0|0|0|0|0|0|0|0|0|0|0|0|0|0|0|1|3|0|0|0|7|4|4|4|0|3|0|1|4|1|1|0|0|0|0	0	0	0	0	0	-17.21	0.28	0.8
ZNF563	Q9NVP1	DDX18	0|1	1	0.5	2	0|5|0|0|0|0|0|0|0|0|0|0|0|0|0|0|0|0|0|1|3|0|0|0|7|4|4|4|0|3|0|1|4|1|1|0|0|0|0	0	0	0	0	0	-17.21	0.14	0.88
ZNF770	Q9NVP1	DDX18	5|6	11	5.5	2	0|5|0|0|0|0|0|0|0|0|0|0|0|0|0|0|0|0|0|1|3|0|0|0|7|4|4|4|0|3|0|1|4|1|1|0|0|0|0	0	0	0	0	0	-8	1.53	0.71
ZSCAN30	Q9NVP1	DDX18	13|8	21	10.5	2	0|5|0|0|0|0|0|0|0|0|0|0|0|0|0|0|0|0|0|1|3|0|0|0|7|4|4|4|0|3|0|1|4|1|1|0|0|0|0	0.46	0.9	0.46	0.9	0.46	-3.93	2.92	0.23
ZNF418	Q9NZL3	ZNF224	1|0	1	0.5	2	0|0|0|0|0|0|0|0|0|0|0|0|0|0|0|0|0|0|0|0|0|0|0|0|0|0|0|0|0|1|0|0|0|0|0|0|0|0|0	0	0	0	0	0	-2.99	5	0.88
ZFP28	Q9NZL3	ZNF224	1|0	1	0.5	2	0|0|0|0|0|0|0|0|0|0|0|0|0|0|0|0|0|0|0|0|0|0|0|0|0|0|0|0|0|1|0|0|0|0|0|0|0|0|0	0	0	0	0	0	-2.99	5	0.88
ZFP82	Q9NZL3	ZNF224	0|2	2	1	2	0|0|0|0|0|0|0|0|0|0|0|0|0|0|0|0|0|0|0|0|0|0|0|0|0|0|0|0|0|1|0|0|0|0|0|0|0|0|0	0.45	0.91	0.45	0.91	0.45	-2.99	10	0.23
ZNF669	Q96CS4	ZNF689	3|1	4	2	2	0|0|0|0|0|0|0|0|0|0|0|0|0|0|0|0|0|0|0|0|0|0|0|0|0|0|0|0|0|0|0|0|0|0|0|0|0|0|0	0.48	0.97	0.48	0.97	0.48	-0.49	20	0.19
ZNF418	Q96CS4	ZNF689	1|0	1	0.5	2	0|0|0|0|0|0|0|0|0|0|0|0|0|0|0|0|0|0|0|0|0|0|0|0|0|0|0|0|0|0|0|0|0|0|0|0|0|0|0	0	0	0	0	0	-3	5	0.88
ZNF708	O95299	NDUFA10	2|2	4	2	2	0|0|0|0|0|0|0|0|0|0|0|0|0|0|0|0|0|0|0|0|0|0|0|0|0|0|0|0|0|0|1|0|1|0|0|0|0|0|0	0.5	0.5	0.5	0.5	0.5	0.01	10	0.13
FEZF1	O95299	NDUFA10	4|2	6	3	2	0|0|0|0|0|0|0|0|0|0|0|0|0|0|0|0|0|0|0|0|0|0|0|0|0|0|0|0|0|0|1|0|1|0|0|0|0|0|0	0.74	0.97	0.74	0.97	0.74	0.01	15	0.06
OSR2	O95299	NDUFA10	2|0	2	1	2	0|0|0|0|0|0|0|0|0|0|0|0|0|0|0|0|0|0|0|0|0|0|0|0|0|0|0|0|0|0|1|0|1|0|0|0|0|0|0	0.25	0.5	0.25	0.5	0.25	-3.36	5	0.39
ZBTB42	O95299	NDUFA10	1|0	1	0.5	2	0|0|0|0|0|0|0|0|0|0|0|0|0|0|0|0|0|0|0|0|0|0|0|0|0|0|0|0|0|0|1|0|1|0|0|0|0|0|0	0	0	0	0	0	-3.36	2.5	0.88
ZNF768	O95299	NDUFA10	4|3	7	3.5	2	0|0|0|0|0|0|0|0|0|0|0|0|0|0|0|0|0|0|0|0|0|0|0|0|0|0|0|0|0|0|1|0|1|0|0|0|0|0|0	0.91	0.97	0.91	0.97	0.91	1.71	17.5	0.02
ZNF419	O95299	NDUFA10	1|0	1	0.5	2	0|0|0|0|0|0|0|0|0|0|0|0|0|0|0|0|0|0|0|0|0|0|0|0|0|0|0|0|0|0|1|0|1|0|0|0|0|0|0	0	0	0	0	0	-3.36	2.5	0.88
ZFP82	O95299	NDUFA10	2|3	5	2.5	2	0|0|0|0|0|0|0|0|0|0|0|0|0|0|0|0|0|0|0|0|0|0|0|0|0|0|0|0|0|0|1|0|1|0|0|0|0|0|0	0.68	0.85	0.68	0.85	0.68	0.01	12.5	0.08
ZNF71	O95299	NDUFA10	3|4	7	3.5	2	0|0|0|0|0|0|0|0|0|0|0|0|0|0|0|0|0|0|0|0|0|0|0|0|0|0|0|0|0|0|1|0|1|0|0|0|0|0|0	0.91	0.97	0.91	0.97	0.91	1.71	17.5	0.02
ZNF770	O95299	NDUFA10	1|1	2	1	2	0|0|0|0|0|0|0|0|0|0|0|0|0|0|0|0|0|0|0|0|0|0|0|0|0|0|0|0|0|0|1|0|1|0|0|0|0|0|0	0	0	0	0	0	-1.75	5	0.88
ZNF667	O95299	NDUFA10	1|0	1	0.5	2	0|0|0|0|0|0|0|0|0|0|0|0|0|0|0|0|0|0|0|0|0|0|0|0|0|0|0|0|0|0|1|0|1|0|0|0|0|0|0	0	0	0	0	0	-3.36	2.5	0.88
ZNF547	Q9UK13	ZNF221	4|4	8	4	2	0|0|0|0|0|0|0|0|0|0|0|0|0|0|0|0|0|0|0|0|0|0|0|0|0|0|0|0|0|0|0|0|0|0|0|0|0|0|0	0.99	0.99	0.99	0.99	0.99	5.13	40	0
ZNF214	P62805	HIST1H4A;HIST1H4B;HIST1H4C;HIST1H4D;HIST1H4E;HIST1H4F;HIST1H4H;HIST1H4I;HIST1H4J;HIST1H4K;HIST1H4L;HIST2H4A;HIST2H4B;HIST4H4	5|6	11	5.5	2	15|25|18|16|22|13|13|14|15|8|8|9|11|14|14|11|11|7|18|12|20|18|26|4|9|17|17|19|7|80|11|24|78|24|26|5|7|4|1	0	0	0	0	0	-133.43	0.16	0.88
IKZF3	P62805	HIST1H4A;HIST1H4B;HIST1H4C;HIST1H4D;HIST1H4E;HIST1H4F;HIST1H4H;HIST1H4I;HIST1H4J;HIST1H4K;HIST1H4L;HIST2H4A;HIST2H4B;HIST4H4	37|42	79	39.5	2	15|25|18|16|22|13|13|14|15|8|8|9|11|14|14|11|11|7|18|12|20|18|26|4|9|17|17|19|7|80|11|24|78|24|26|5|7|4|1	0	0	0	0	0	-68.88	1.15	0.88
ZNF490	P62805	HIST1H4A;HIST1H4B;HIST1H4C;HIST1H4D;HIST1H4E;HIST1H4F;HIST1H4H;HIST1H4I;HIST1H4J;HIST1H4K;HIST1H4L;HIST2H4A;HIST2H4B;HIST4H4	12|11	23	11.5	2	15|25|18|16|22|13|13|14|15|8|8|9|11|14|14|11|11|7|18|12|20|18|26|4|9|17|17|19|7|80|11|24|78|24|26|5|7|4|1	0	0	0	0	0	-116.43	0.33	0.88
ZNF331	P62805	HIST1H4A;HIST1H4B;HIST1H4C;HIST1H4D;HIST1H4E;HIST1H4F;HIST1H4H;HIST1H4I;HIST1H4J;HIST1H4K;HIST1H4L;HIST2H4A;HIST2H4B;HIST4H4	16|18	34	17	2	15|25|18|16|22|13|13|14|15|8|8|9|11|14|14|11|11|7|18|12|20|18|26|4|9|17|17|19|7|80|11|24|78|24|26|5|7|4|1	0	0	0	0	0	-104.81	0.49	0.88
ZNF250	P62805	HIST1H4A;HIST1H4B;HIST1H4C;HIST1H4D;HIST1H4E;HIST1H4F;HIST1H4H;HIST1H4I;HIST1H4J;HIST1H4K;HIST1H4L;HIST2H4A;HIST2H4B;HIST4H4	46|45	91	45.5	2	15|25|18|16|22|13|13|14|15|8|8|9|11|14|14|11|11|7|18|12|20|18|26|4|9|17|17|19|7|80|11|24|78|24|26|5|7|4|1	0	0	0	0	0	-58.4	1.32	0.88
GLIS1	P62805	HIST1H4A;HIST1H4B;HIST1H4C;HIST1H4D;HIST1H4E;HIST1H4F;HIST1H4H;HIST1H4I;HIST1H4J;HIST1H4K;HIST1H4L;HIST2H4A;HIST2H4B;HIST4H4	27|28	55	27.5	2	15|25|18|16|22|13|13|14|15|8|8|9|11|14|14|11|11|7|18|12|20|18|26|4|9|17|17|19|7|80|11|24|78|24|26|5|7|4|1	0	0	0	0	0	-84.04	0.8	0.88
ZNF595	P62805	HIST1H4A;HIST1H4B;HIST1H4C;HIST1H4D;HIST1H4E;HIST1H4F;HIST1H4H;HIST1H4I;HIST1H4J;HIST1H4K;HIST1H4L;HIST2H4A;HIST2H4B;HIST4H4	14|14	28	14	2	15|25|18|16|22|13|13|14|15|8|8|9|11|14|14|11|11|7|18|12|20|18|26|4|9|17|17|19|7|80|11|24|78|24|26|5|7|4|1	0	0	0	0	0	-109.25	0.41	0.88
ZNF257	P62805	HIST1H4A;HIST1H4B;HIST1H4C;HIST1H4D;HIST1H4E;HIST1H4F;HIST1H4H;HIST1H4I;HIST1H4J;HIST1H4K;HIST1H4L;HIST2H4A;HIST2H4B;HIST4H4	14|11	25	12.5	2	15|25|18|16|22|13|13|14|15|8|8|9|11|14|14|11|11|7|18|12|20|18|26|4|9|17|17|19|7|80|11|24|78|24|26|5|7|4|1	0	0	0	0	0	-116.43	0.36	0.88
ZNF34	P62805	HIST1H4A;HIST1H4B;HIST1H4C;HIST1H4D;HIST1H4E;HIST1H4F;HIST1H4H;HIST1H4I;HIST1H4J;HIST1H4K;HIST1H4L;HIST2H4A;HIST2H4B;HIST4H4	10|11	21	10.5	2	15|25|18|16|22|13|13|14|15|8|8|9|11|14|14|11|11|7|18|12|20|18|26|4|9|17|17|19|7|80|11|24|78|24|26|5|7|4|1	0	0	0	0	0	-118.99	0.31	0.88
ZFP28	P62805	HIST1H4A;HIST1H4B;HIST1H4C;HIST1H4D;HIST1H4E;HIST1H4F;HIST1H4H;HIST1H4I;HIST1H4J;HIST1H4K;HIST1H4L;HIST2H4A;HIST2H4B;HIST4H4	16|9	25	12.5	2	15|25|18|16|22|13|13|14|15|8|8|9|11|14|14|11|11|7|18|12|20|18|26|4|9|17|17|19|7|80|11|24|78|24|26|5|7|4|1	0	0	0	0	0	-121.64	0.36	0.88
SCRT1	P62805	HIST1H4A;HIST1H4B;HIST1H4C;HIST1H4D;HIST1H4E;HIST1H4F;HIST1H4H;HIST1H4I;HIST1H4J;HIST1H4K;HIST1H4L;HIST2H4A;HIST2H4B;HIST4H4	44|40	84	42	2	15|25|18|16|22|13|13|14|15|8|8|9|11|14|14|11|11|7|18|12|20|18|26|4|9|17|17|19|7|80|11|24|78|24|26|5|7|4|1	0	0	0	0	0	-64.78	1.22	0.88
ZNF667	P62805	HIST1H4A;HIST1H4B;HIST1H4C;HIST1H4D;HIST1H4E;HIST1H4F;HIST1H4H;HIST1H4I;HIST1H4J;HIST1H4K;HIST1H4L;HIST2H4A;HIST2H4B;HIST4H4	19|14	33	16.5	2	15|25|18|16|22|13|13|14|15|8|8|9|11|14|14|11|11|7|18|12|20|18|26|4|9|17|17|19|7|80|11|24|78|24|26|5|7|4|1	0	0	0	0	0	-109.25	0.48	0.88
ZNF594	P62805	HIST1H4A;HIST1H4B;HIST1H4C;HIST1H4D;HIST1H4E;HIST1H4F;HIST1H4H;HIST1H4I;HIST1H4J;HIST1H4K;HIST1H4L;HIST2H4A;HIST2H4B;HIST4H4	31|37	68	34	2	15|25|18|16|22|13|13|14|15|8|8|9|11|14|14|11|11|7|18|12|20|18|26|4|9|17|17|19|7|80|11|24|78|24|26|5|7|4|1	0	0	0	0	0	-77.66	0.99	0.88
ZNF419	P62805	HIST1H4A;HIST1H4B;HIST1H4C;HIST1H4D;HIST1H4E;HIST1H4F;HIST1H4H;HIST1H4I;HIST1H4J;HIST1H4K;HIST1H4L;HIST2H4A;HIST2H4B;HIST4H4	28|25	53	26.5	2	15|25|18|16|22|13|13|14|15|8|8|9|11|14|14|11|11|7|18|12|20|18|26|4|9|17|17|19|7|80|11|24|78|24|26|5|7|4|1	0	0	0	0	0	-87.43	0.77	0.88
ZNF16	P62805	HIST1H4A;HIST1H4B;HIST1H4C;HIST1H4D;HIST1H4E;HIST1H4F;HIST1H4H;HIST1H4I;HIST1H4J;HIST1H4K;HIST1H4L;HIST2H4A;HIST2H4B;HIST4H4	12|10	22	11	2	15|25|18|16|22|13|13|14|15|8|8|9|11|14|14|11|11|7|18|12|20|18|26|4|9|17|17|19|7|80|11|24|78|24|26|5|7|4|1	0	0	0	0	0	-118.99	0.32	0.88
ZNF71	P62805	HIST1H4A;HIST1H4B;HIST1H4C;HIST1H4D;HIST1H4E;HIST1H4F;HIST1H4H;HIST1H4I;HIST1H4J;HIST1H4K;HIST1H4L;HIST2H4A;HIST2H4B;HIST4H4	24|32	56	28	2	15|25|18|16|22|13|13|14|15|8|8|9|11|14|14|11|11|7|18|12|20|18|26|4|9|17|17|19|7|80|11|24|78|24|26|5|7|4|1	0	0	0	0	0	-89.19	0.81	0.88
ZNF816	P62805	HIST1H4A;HIST1H4B;HIST1H4C;HIST1H4D;HIST1H4E;HIST1H4F;HIST1H4H;HIST1H4I;HIST1H4J;HIST1H4K;HIST1H4L;HIST2H4A;HIST2H4B;HIST4H4	15|14	29	14.5	2	15|25|18|16|22|13|13|14|15|8|8|9|11|14|14|11|11|7|18|12|20|18|26|4|9|17|17|19|7|80|11|24|78|24|26|5|7|4|1	0	0	0	0	0	-109.25	0.42	0.88
ZSCAN5C	P62805	HIST1H4A;HIST1H4B;HIST1H4C;HIST1H4D;HIST1H4E;HIST1H4F;HIST1H4H;HIST1H4I;HIST1H4J;HIST1H4K;HIST1H4L;HIST2H4A;HIST2H4B;HIST4H4	24|31	55	27.5	2	15|25|18|16|22|13|13|14|15|8|8|9|11|14|14|11|11|7|18|12|20|18|26|4|9|17|17|19|7|80|11|24|78|24|26|5|7|4|1	0	0	0	0	0	-89.19	0.8	0.88
ZBTB6	P62805	HIST1H4A;HIST1H4B;HIST1H4C;HIST1H4D;HIST1H4E;HIST1H4F;HIST1H4H;HIST1H4I;HIST1H4J;HIST1H4K;HIST1H4L;HIST2H4A;HIST2H4B;HIST4H4	13|13	26	13	2	15|25|18|16|22|13|13|14|15|8|8|9|11|14|14|11|11|7|18|12|20|18|26|4|9|17|17|19|7|80|11|24|78|24|26|5|7|4|1	0	0	0	0	0	-111.57	0.38	0.88
ZNF140	P62805	HIST1H4A;HIST1H4B;HIST1H4C;HIST1H4D;HIST1H4E;HIST1H4F;HIST1H4H;HIST1H4I;HIST1H4J;HIST1H4K;HIST1H4L;HIST2H4A;HIST2H4B;HIST4H4	9|6	15	7.5	2	15|25|18|16|22|13|13|14|15|8|8|9|11|14|14|11|11|7|18|12|20|18|26|4|9|17|17|19|7|80|11|24|78|24|26|5|7|4|1	0	0	0	0	0	-130.27	0.22	0.88
ZNF708	P62805	HIST1H4A;HIST1H4B;HIST1H4C;HIST1H4D;HIST1H4E;HIST1H4F;HIST1H4H;HIST1H4I;HIST1H4J;HIST1H4K;HIST1H4L;HIST2H4A;HIST2H4B;HIST4H4	31|31	62	31	2	15|25|18|16|22|13|13|14|15|8|8|9|11|14|14|11|11|7|18|12|20|18|26|4|9|17|17|19|7|80|11|24|78|24|26|5|7|4|1	0	0	0	0	0	-77.66	0.9	0.88
FEZF1	P62805	HIST1H4A;HIST1H4B;HIST1H4C;HIST1H4D;HIST1H4E;HIST1H4F;HIST1H4H;HIST1H4I;HIST1H4J;HIST1H4K;HIST1H4L;HIST2H4A;HIST2H4B;HIST4H4	44|37	81	40.5	2	15|25|18|16|22|13|13|14|15|8|8|9|11|14|14|11|11|7|18|12|20|18|26|4|9|17|17|19|7|80|11|24|78|24|26|5|7|4|1	0	0	0	0	0	-68.88	1.18	0.88
MZF1	P62805	HIST1H4A;HIST1H4B;HIST1H4C;HIST1H4D;HIST1H4E;HIST1H4F;HIST1H4H;HIST1H4I;HIST1H4J;HIST1H4K;HIST1H4L;HIST2H4A;HIST2H4B;HIST4H4	14|13	27	13.5	2	15|25|18|16|22|13|13|14|15|8|8|9|11|14|14|11|11|7|18|12|20|18|26|4|9|17|17|19|7|80|11|24|78|24|26|5|7|4|1	0	0	0	0	0	-111.57	0.39	0.88
ZBTB14	P62805	HIST1H4A;HIST1H4B;HIST1H4C;HIST1H4D;HIST1H4E;HIST1H4F;HIST1H4H;HIST1H4I;HIST1H4J;HIST1H4K;HIST1H4L;HIST2H4A;HIST2H4B;HIST4H4	30|25	55	27.5	2	15|25|18|16|22|13|13|14|15|8|8|9|11|14|14|11|11|7|18|12|20|18|26|4|9|17|17|19|7|80|11|24|78|24|26|5|7|4|1	0	0	0	0	0	-87.43	0.8	0.88
ZNF18	P62805	HIST1H4A;HIST1H4B;HIST1H4C;HIST1H4D;HIST1H4E;HIST1H4F;HIST1H4H;HIST1H4I;HIST1H4J;HIST1H4K;HIST1H4L;HIST2H4A;HIST2H4B;HIST4H4	17|26	43	21.5	2	15|25|18|16|22|13|13|14|15|8|8|9|11|14|14|11|11|7|18|12|20|18|26|4|9|17|17|19|7|80|11|24|78|24|26|5|7|4|1	0	0	0	0	0	-102.68	0.62	0.88
ZBTB42	P62805	HIST1H4A;HIST1H4B;HIST1H4C;HIST1H4D;HIST1H4E;HIST1H4F;HIST1H4H;HIST1H4I;HIST1H4J;HIST1H4K;HIST1H4L;HIST2H4A;HIST2H4B;HIST4H4	19|22	41	20.5	2	15|25|18|16|22|13|13|14|15|8|8|9|11|14|14|11|11|7|18|12|20|18|26|4|9|17|17|19|7|80|11|24|78|24|26|5|7|4|1	0	0	0	0	0	-98.59	0.6	0.88
ZNF8	P62805	HIST1H4A;HIST1H4B;HIST1H4C;HIST1H4D;HIST1H4E;HIST1H4F;HIST1H4H;HIST1H4I;HIST1H4J;HIST1H4K;HIST1H4L;HIST2H4A;HIST2H4B;HIST4H4	21|14	35	17.5	2	15|25|18|16|22|13|13|14|15|8|8|9|11|14|14|11|11|7|18|12|20|18|26|4|9|17|17|19|7|80|11|24|78|24|26|5|7|4|1	0	0	0	0	0	-109.25	0.51	0.88
ZFP3	P62805	HIST1H4A;HIST1H4B;HIST1H4C;HIST1H4D;HIST1H4E;HIST1H4F;HIST1H4H;HIST1H4I;HIST1H4J;HIST1H4K;HIST1H4L;HIST2H4A;HIST2H4B;HIST4H4	18|26	44	22	2	15|25|18|16|22|13|13|14|15|8|8|9|11|14|14|11|11|7|18|12|20|18|26|4|9|17|17|19|7|80|11|24|78|24|26|5|7|4|1	0	0	0	0	0	-100.61	0.64	0.88
KLF7	P62805	HIST1H4A;HIST1H4B;HIST1H4C;HIST1H4D;HIST1H4E;HIST1H4F;HIST1H4H;HIST1H4I;HIST1H4J;HIST1H4K;HIST1H4L;HIST2H4A;HIST2H4B;HIST4H4	20|30	50	25	2	15|25|18|16|22|13|13|14|15|8|8|9|11|14|14|11|11|7|18|12|20|18|26|4|9|17|17|19|7|80|11|24|78|24|26|5|7|4|1	0	0	0	0	0	-96.62	0.73	0.88
ZNF669	P62805	HIST1H4A;HIST1H4B;HIST1H4C;HIST1H4D;HIST1H4E;HIST1H4F;HIST1H4H;HIST1H4I;HIST1H4J;HIST1H4K;HIST1H4L;HIST2H4A;HIST2H4B;HIST4H4	20|18	38	19	2	15|25|18|16|22|13|13|14|15|8|8|9|11|14|14|11|11|7|18|12|20|18|26|4|9|17|17|19|7|80|11|24|78|24|26|5|7|4|1	0	0	0	0	0	-100.61	0.55	0.88
ZNF436	P62805	HIST1H4A;HIST1H4B;HIST1H4C;HIST1H4D;HIST1H4E;HIST1H4F;HIST1H4H;HIST1H4I;HIST1H4J;HIST1H4K;HIST1H4L;HIST2H4A;HIST2H4B;HIST4H4	27|45	72	36	2	15|25|18|16|22|13|13|14|15|8|8|9|11|14|14|11|11|7|18|12|20|18|26|4|9|17|17|19|7|80|11|24|78|24|26|5|7|4|1	0	0	0	0	0	-84.04	1.05	0.88
ZNF768	P62805	HIST1H4A;HIST1H4B;HIST1H4C;HIST1H4D;HIST1H4E;HIST1H4F;HIST1H4H;HIST1H4I;HIST1H4J;HIST1H4K;HIST1H4L;HIST2H4A;HIST2H4B;HIST4H4	36|27	63	31.5	2	15|25|18|16|22|13|13|14|15|8|8|9|11|14|14|11|11|7|18|12|20|18|26|4|9|17|17|19|7|80|11|24|78|24|26|5|7|4|1	0	0	0	0	0	-84.04	0.92	0.88
KLF1	P62805	HIST1H4A;HIST1H4B;HIST1H4C;HIST1H4D;HIST1H4E;HIST1H4F;HIST1H4H;HIST1H4I;HIST1H4J;HIST1H4K;HIST1H4L;HIST2H4A;HIST2H4B;HIST4H4	39|24	63	31.5	2	15|25|18|16|22|13|13|14|15|8|8|9|11|14|14|11|11|7|18|12|20|18|26|4|9|17|17|19|7|80|11|24|78|24|26|5|7|4|1	0	0	0	0	0	-89.19	0.92	0.88
ZNF418	P62805	HIST1H4A;HIST1H4B;HIST1H4C;HIST1H4D;HIST1H4E;HIST1H4F;HIST1H4H;HIST1H4I;HIST1H4J;HIST1H4K;HIST1H4L;HIST2H4A;HIST2H4B;HIST4H4	9|16	25	12.5	2	15|25|18|16|22|13|13|14|15|8|8|9|11|14|14|11|11|7|18|12|20|18|26|4|9|17|17|19|7|80|11|24|78|24|26|5|7|4|1	0	0	0	0	0	-121.64	0.36	0.88
ZNF513	P62805	HIST1H4A;HIST1H4B;HIST1H4C;HIST1H4D;HIST1H4E;HIST1H4F;HIST1H4H;HIST1H4I;HIST1H4J;HIST1H4K;HIST1H4L;HIST2H4A;HIST2H4B;HIST4H4	6|8	14	7	2	15|25|18|16|22|13|13|14|15|8|8|9|11|14|14|11|11|7|18|12|20|18|26|4|9|17|17|19|7|80|11|24|78|24|26|5|7|4|1	0	0	0	0	0	-130.27	0.2	0.88
ZIM3	P62805	HIST1H4A;HIST1H4B;HIST1H4C;HIST1H4D;HIST1H4E;HIST1H4F;HIST1H4H;HIST1H4I;HIST1H4J;HIST1H4K;HIST1H4L;HIST2H4A;HIST2H4B;HIST4H4	7|20	27	13.5	2	15|25|18|16|22|13|13|14|15|8|8|9|11|14|14|11|11|7|18|12|20|18|26|4|9|17|17|19|7|80|11|24|78|24|26|5|7|4|1	0	0	0	0	0	-127.27	0.39	0.88
ZNF184	P62805	HIST1H4A;HIST1H4B;HIST1H4C;HIST1H4D;HIST1H4E;HIST1H4F;HIST1H4H;HIST1H4I;HIST1H4J;HIST1H4K;HIST1H4L;HIST2H4A;HIST2H4B;HIST4H4	4|7	11	5.5	2	15|25|18|16|22|13|13|14|15|8|8|9|11|14|14|11|11|7|18|12|20|18|26|4|9|17|17|19|7|80|11|24|78|24|26|5|7|4|1	0	0	0	0	0	-136.77	0.16	0.88
ZNF692	P62805	HIST1H4A;HIST1H4B;HIST1H4C;HIST1H4D;HIST1H4E;HIST1H4F;HIST1H4H;HIST1H4I;HIST1H4J;HIST1H4K;HIST1H4L;HIST2H4A;HIST2H4B;HIST4H4	17|13	30	15	2	15|25|18|16|22|13|13|14|15|8|8|9|11|14|14|11|11|7|18|12|20|18|26|4|9|17|17|19|7|80|11|24|78|24|26|5|7|4|1	0	0	0	0	0	-111.57	0.44	0.88
ZNF320	P62805	HIST1H4A;HIST1H4B;HIST1H4C;HIST1H4D;HIST1H4E;HIST1H4F;HIST1H4H;HIST1H4I;HIST1H4J;HIST1H4K;HIST1H4L;HIST2H4A;HIST2H4B;HIST4H4	44|53	97	48.5	2	15|25|18|16|22|13|13|14|15|8|8|9|11|14|14|11|11|7|18|12|20|18|26|4|9|17|17|19|7|80|11|24|78|24|26|5|7|4|1	0	0	0	0	0	-59.63	1.41	0.87
ZNF322	P62805	HIST1H4A;HIST1H4B;HIST1H4C;HIST1H4D;HIST1H4E;HIST1H4F;HIST1H4H;HIST1H4I;HIST1H4J;HIST1H4K;HIST1H4L;HIST2H4A;HIST2H4B;HIST4H4	46|32	78	39	2	15|25|18|16|22|13|13|14|15|8|8|9|11|14|14|11|11|7|18|12|20|18|26|4|9|17|17|19|7|80|11|24|78|24|26|5|7|4|1	0	0	0	0	0	-76.14	1.13	0.88
ZNF189	P62805	HIST1H4A;HIST1H4B;HIST1H4C;HIST1H4D;HIST1H4E;HIST1H4F;HIST1H4H;HIST1H4I;HIST1H4J;HIST1H4K;HIST1H4L;HIST2H4A;HIST2H4B;HIST4H4	22|25	47	23.5	2	15|25|18|16|22|13|13|14|15|8|8|9|11|14|14|11|11|7|18|12|20|18|26|4|9|17|17|19|7|80|11|24|78|24|26|5|7|4|1	0	0	0	0	0	-92.81	0.68	0.88
ZNF329	P62805	HIST1H4A;HIST1H4B;HIST1H4C;HIST1H4D;HIST1H4E;HIST1H4F;HIST1H4H;HIST1H4I;HIST1H4J;HIST1H4K;HIST1H4L;HIST2H4A;HIST2H4B;HIST4H4	21|25	46	23	2	15|25|18|16|22|13|13|14|15|8|8|9|11|14|14|11|11|7|18|12|20|18|26|4|9|17|17|19|7|80|11|24|78|24|26|5|7|4|1	0	0	0	0	0	-94.69	0.67	0.88
OSR2	P62805	HIST1H4A;HIST1H4B;HIST1H4C;HIST1H4D;HIST1H4E;HIST1H4F;HIST1H4H;HIST1H4I;HIST1H4J;HIST1H4K;HIST1H4L;HIST2H4A;HIST2H4B;HIST4H4	17|28	45	22.5	2	15|25|18|16|22|13|13|14|15|8|8|9|11|14|14|11|11|7|18|12|20|18|26|4|9|17|17|19|7|80|11|24|78|24|26|5|7|4|1	0	0	0	0	0	-102.68	0.65	0.88
ZNF582	P62805	HIST1H4A;HIST1H4B;HIST1H4C;HIST1H4D;HIST1H4E;HIST1H4F;HIST1H4H;HIST1H4I;HIST1H4J;HIST1H4K;HIST1H4L;HIST2H4A;HIST2H4B;HIST4H4	20|22	42	21	2	15|25|18|16|22|13|13|14|15|8|8|9|11|14|14|11|11|7|18|12|20|18|26|4|9|17|17|19|7|80|11|24|78|24|26|5|7|4|1	0	0	0	0	0	-96.62	0.61	0.88
MYNN	P62805	HIST1H4A;HIST1H4B;HIST1H4C;HIST1H4D;HIST1H4E;HIST1H4F;HIST1H4H;HIST1H4I;HIST1H4J;HIST1H4K;HIST1H4L;HIST2H4A;HIST2H4B;HIST4H4	40|39	79	39.5	2	15|25|18|16|22|13|13|14|15|8|8|9|11|14|14|11|11|7|18|12|20|18|26|4|9|17|17|19|7|80|11|24|78|24|26|5|7|4|1	0	0	0	0	0	-66.12	1.15	0.88
ZFP82	P62805	HIST1H4A;HIST1H4B;HIST1H4C;HIST1H4D;HIST1H4E;HIST1H4F;HIST1H4H;HIST1H4I;HIST1H4J;HIST1H4K;HIST1H4L;HIST2H4A;HIST2H4B;HIST4H4	27|40	67	33.5	2	15|25|18|16|22|13|13|14|15|8|8|9|11|14|14|11|11|7|18|12|20|18|26|4|9|17|17|19|7|80|11|24|78|24|26|5|7|4|1	0	0	0	0	0	-84.04	0.97	0.88
PATZ1	P62805	HIST1H4A;HIST1H4B;HIST1H4C;HIST1H4D;HIST1H4E;HIST1H4F;HIST1H4H;HIST1H4I;HIST1H4J;HIST1H4K;HIST1H4L;HIST2H4A;HIST2H4B;HIST4H4	32|35	67	33.5	2	15|25|18|16|22|13|13|14|15|8|8|9|11|14|14|11|11|7|18|12|20|18|26|4|9|17|17|19|7|80|11|24|78|24|26|5|7|4|1	0	0	0	0	0	-76.14	0.97	0.88
ZNF394	P62805	HIST1H4A;HIST1H4B;HIST1H4C;HIST1H4D;HIST1H4E;HIST1H4F;HIST1H4H;HIST1H4I;HIST1H4J;HIST1H4K;HIST1H4L;HIST2H4A;HIST2H4B;HIST4H4	16|9	25	12.5	2	15|25|18|16|22|13|13|14|15|8|8|9|11|14|14|11|11|7|18|12|20|18|26|4|9|17|17|19|7|80|11|24|78|24|26|5|7|4|1	0	0	0	0	0	-121.64	0.36	0.88
ZNF610	P62805	HIST1H4A;HIST1H4B;HIST1H4C;HIST1H4D;HIST1H4E;HIST1H4F;HIST1H4H;HIST1H4I;HIST1H4J;HIST1H4K;HIST1H4L;HIST2H4A;HIST2H4B;HIST4H4	8|7	15	7.5	2	15|25|18|16|22|13|13|14|15|8|8|9|11|14|14|11|11|7|18|12|20|18|26|4|9|17|17|19|7|80|11|24|78|24|26|5|7|4|1	0	0	0	0	0	-127.27	0.22	0.88
ZNF502	P62805	HIST1H4A;HIST1H4B;HIST1H4C;HIST1H4D;HIST1H4E;HIST1H4F;HIST1H4H;HIST1H4I;HIST1H4J;HIST1H4K;HIST1H4L;HIST2H4A;HIST2H4B;HIST4H4	18|18	36	18	2	15|25|18|16|22|13|13|14|15|8|8|9|11|14|14|11|11|7|18|12|20|18|26|4|9|17|17|19|7|80|11|24|78|24|26|5|7|4|1	0	0	0	0	0	-100.61	0.52	0.88
ZNF324	P62805	HIST1H4A;HIST1H4B;HIST1H4C;HIST1H4D;HIST1H4E;HIST1H4F;HIST1H4H;HIST1H4I;HIST1H4J;HIST1H4K;HIST1H4L;HIST2H4A;HIST2H4B;HIST4H4	4|6	10	5	2	15|25|18|16|22|13|13|14|15|8|8|9|11|14|14|11|11|7|18|12|20|18|26|4|9|17|17|19|7|80|11|24|78|24|26|5|7|4|1	0	0	0	0	0	-136.77	0.15	0.88
ZNF549	P62805	HIST1H4A;HIST1H4B;HIST1H4C;HIST1H4D;HIST1H4E;HIST1H4F;HIST1H4H;HIST1H4I;HIST1H4J;HIST1H4K;HIST1H4L;HIST2H4A;HIST2H4B;HIST4H4	11|16	27	13.5	2	15|25|18|16|22|13|13|14|15|8|8|9|11|14|14|11|11|7|18|12|20|18|26|4|9|17|17|19|7|80|11|24|78|24|26|5|7|4|1	0	0	0	0	0	-116.43	0.39	0.88
MAZ	P62805	HIST1H4A;HIST1H4B;HIST1H4C;HIST1H4D;HIST1H4E;HIST1H4F;HIST1H4H;HIST1H4I;HIST1H4J;HIST1H4K;HIST1H4L;HIST2H4A;HIST2H4B;HIST4H4	67|33	100	50	2	15|25|18|16|22|13|13|14|15|8|8|9|11|14|14|11|11|7|18|12|20|18|26|4|9|17|17|19|7|80|11|24|78|24|26|5|7|4|1	0	0	0	0	0	-74.66	1.45	0.87
ZNF449	P62805	HIST1H4A;HIST1H4B;HIST1H4C;HIST1H4D;HIST1H4E;HIST1H4F;HIST1H4H;HIST1H4I;HIST1H4J;HIST1H4K;HIST1H4L;HIST2H4A;HIST2H4B;HIST4H4	32|47	79	39.5	2	15|25|18|16|22|13|13|14|15|8|8|9|11|14|14|11|11|7|18|12|20|18|26|4|9|17|17|19|7|80|11|24|78|24|26|5|7|4|1	0	0	0	0	0	-76.14	1.15	0.88
ZNF280A	P62805	HIST1H4A;HIST1H4B;HIST1H4C;HIST1H4D;HIST1H4E;HIST1H4F;HIST1H4H;HIST1H4I;HIST1H4J;HIST1H4K;HIST1H4L;HIST2H4A;HIST2H4B;HIST4H4	32|31	63	31.5	2	15|25|18|16|22|13|13|14|15|8|8|9|11|14|14|11|11|7|18|12|20|18|26|4|9|17|17|19|7|80|11|24|78|24|26|5|7|4|1	0	0	0	0	0	-77.66	0.92	0.88
GTF3A	P62805	HIST1H4A;HIST1H4B;HIST1H4C;HIST1H4D;HIST1H4E;HIST1H4F;HIST1H4H;HIST1H4I;HIST1H4J;HIST1H4K;HIST1H4L;HIST2H4A;HIST2H4B;HIST4H4	31|30	61	30.5	2	15|25|18|16|22|13|13|14|15|8|8|9|11|14|14|11|11|7|18|12|20|18|26|4|9|17|17|19|7|80|11|24|78|24|26|5|7|4|1	0	0	0	0	0	-79.2	0.89	0.88
ZNF547	P62805	HIST1H4A;HIST1H4B;HIST1H4C;HIST1H4D;HIST1H4E;HIST1H4F;HIST1H4H;HIST1H4I;HIST1H4J;HIST1H4K;HIST1H4L;HIST2H4A;HIST2H4B;HIST4H4	38|30	68	34	2	15|25|18|16|22|13|13|14|15|8|8|9|11|14|14|11|11|7|18|12|20|18|26|4|9|17|17|19|7|80|11|24|78|24|26|5|7|4|1	0	0	0	0	0	-79.2	0.99	0.88
PRDM1	P62805	HIST1H4A;HIST1H4B;HIST1H4C;HIST1H4D;HIST1H4E;HIST1H4F;HIST1H4H;HIST1H4I;HIST1H4J;HIST1H4K;HIST1H4L;HIST2H4A;HIST2H4B;HIST4H4	42|41	83	41.5	2	15|25|18|16|22|13|13|14|15|8|8|9|11|14|14|11|11|7|18|12|20|18|26|4|9|17|17|19|7|80|11|24|78|24|26|5|7|4|1	0	0	0	0	0	-63.46	1.21	0.88
ZNF778	P62805	HIST1H4A;HIST1H4B;HIST1H4C;HIST1H4D;HIST1H4E;HIST1H4F;HIST1H4H;HIST1H4I;HIST1H4J;HIST1H4K;HIST1H4L;HIST2H4A;HIST2H4B;HIST4H4	25|27	52	26	2	15|25|18|16|22|13|13|14|15|8|8|9|11|14|14|11|11|7|18|12|20|18|26|4|9|17|17|19|7|80|11|24|78|24|26|5|7|4|1	0	0	0	0	0	-87.43	0.76	0.88
ZNF596	P62805	HIST1H4A;HIST1H4B;HIST1H4C;HIST1H4D;HIST1H4E;HIST1H4F;HIST1H4H;HIST1H4I;HIST1H4J;HIST1H4K;HIST1H4L;HIST2H4A;HIST2H4B;HIST4H4	18|29	47	23.5	2	15|25|18|16|22|13|13|14|15|8|8|9|11|14|14|11|11|7|18|12|20|18|26|4|9|17|17|19|7|80|11|24|78|24|26|5|7|4|1	0	0	0	0	0	-100.61	0.68	0.88
ZNF37A	P62805	HIST1H4A;HIST1H4B;HIST1H4C;HIST1H4D;HIST1H4E;HIST1H4F;HIST1H4H;HIST1H4I;HIST1H4J;HIST1H4K;HIST1H4L;HIST2H4A;HIST2H4B;HIST4H4	17|19	36	18	2	15|25|18|16|22|13|13|14|15|8|8|9|11|14|14|11|11|7|18|12|20|18|26|4|9|17|17|19|7|80|11|24|78|24|26|5|7|4|1	0	0	0	0	0	-102.68	0.52	0.88
ZNF563	P62805	HIST1H4A;HIST1H4B;HIST1H4C;HIST1H4D;HIST1H4E;HIST1H4F;HIST1H4H;HIST1H4I;HIST1H4J;HIST1H4K;HIST1H4L;HIST2H4A;HIST2H4B;HIST4H4	17|18	35	17.5	2	15|25|18|16|22|13|13|14|15|8|8|9|11|14|14|11|11|7|18|12|20|18|26|4|9|17|17|19|7|80|11|24|78|24|26|5|7|4|1	0	0	0	0	0	-102.68	0.51	0.88
ZNF770	P62805	HIST1H4A;HIST1H4B;HIST1H4C;HIST1H4D;HIST1H4E;HIST1H4F;HIST1H4H;HIST1H4I;HIST1H4J;HIST1H4K;HIST1H4L;HIST2H4A;HIST2H4B;HIST4H4	17|19	36	18	2	15|25|18|16|22|13|13|14|15|8|8|9|11|14|14|11|11|7|18|12|20|18|26|4|9|17|17|19|7|80|11|24|78|24|26|5|7|4|1	0	0	0	0	0	-102.68	0.52	0.88
ZSCAN30	P62805	HIST1H4A;HIST1H4B;HIST1H4C;HIST1H4D;HIST1H4E;HIST1H4F;HIST1H4H;HIST1H4I;HIST1H4J;HIST1H4K;HIST1H4L;HIST2H4A;HIST2H4B;HIST4H4	32|33	65	32.5	2	15|25|18|16|22|13|13|14|15|8|8|9|11|14|14|11|11|7|18|12|20|18|26|4|9|17|17|19|7|80|11|24|78|24|26|5|7|4|1	0	0	0	0	0	-76.14	0.94	0.88
ZNF513	O60610	DIAPH1	0|9	9	4.5	2	0|0|0|0|0|0|0|0|0|0|0|0|0|0|0|0|0|0|0|0|0|0|0|0|0|0|0|0|0|0|0|0|0|0|0|0|0|0|0	0.5	1	0.5	1	0.5	-3	45	0.14
MAZ	O60610	DIAPH1	0|1	1	0.5	2	0|0|0|0|0|0|0|0|0|0|0|0|0|0|0|0|0|0|0|0|0|0|0|0|0|0|0|0|0|0|0|0|0|0|0|0|0|0|0	0	0	0	0	0	-3	5	0.88
ZSCAN30	O60610	DIAPH1	0|2	2	1	2	0|0|0|0|0|0|0|0|0|0|0|0|0|0|0|0|0|0|0|0|0|0|0|0|0|0|0|0|0|0|0|0|0|0|0|0|0|0|0	0.41	0.82	0.41	0.82	0.41	-3	10	0.28
ZBTB42	Q9UKL0	RCOR1	4|5	9	4.5	2	0|0|0|0|0|0|0|0|0|0|0|0|0|0|0|0|0|0|0|0|0|0|0|0|0|0|0|0|0|0|0|0|0|0|0|0|0|0|0	1	1	1	1	1	5.13	45	0
ZNF189	Q9UKL0	RCOR1	2|1	3	1.5	2	0|0|0|0|0|0|0|0|0|0|0|0|0|0|0|0|0|0|0|0|0|0|0|0|0|0|0|0|0|0|0|0|0|0|0|0|0|0|0	0.41	0.82	0.41	0.82	0.41	-0.49	15	0.28
ZSCAN5C	Q9UKL0	RCOR1	4|5	9	4.5	2	0|0|0|0|0|0|0|0|0|0|0|0|0|0|0|0|0|0|0|0|0|0|0|0|0|0|0|0|0|0|0|0|0|0|0|0|0|0|0	1	1	1	1	1	5.13	45	0
MYNN	Q9UKL0	RCOR1	52|48	100	50	2	0|0|0|0|0|0|0|0|0|0|0|0|0|0|0|0|0|0|0|0|0|0|0|0|0|0|0|0|0|0|0|0|0|0|0|0|0|0|0	1	1	1	1	1	70.29	500	0
ZNF71	P28340	POLD1	1|0	1	0.5	2	0|0|0|0|0|0|0|0|0|0|0|0|0|0|0|0|0|0|0|0|0|0|0|0|0|0|0|0|0|0|0|0|0|0|1|0|0|0|0	0	0	0	0	0	-2.99	5	0.88
MAZ	Q9BXW7	CECR5	0|1	1	0.5	2	0|0|0|0|0|0|0|0|0|0|0|0|0|0|0|0|0|0|0|0|2|0|0|0|0|0|0|0|0|0|1|0|0|0|0|0|0|0|0	0	0	0	0	0	-3.74	1.67	0.88
ZNF436	Q9BXW7	CECR5	0|1	1	0.5	2	0|0|0|0|0|0|0|0|0|0|0|0|0|0|0|0|0|0|0|0|2|0|0|0|0|0|0|0|0|0|1|0|0|0|0|0|0|0|0	0	0	0	0	0	-3.74	1.67	0.88
FEZF1	Q9BXW7	CECR5	2|0	2	1	2	0|0|0|0|0|0|0|0|0|0|0|0|0|0|0|0|0|0|0|0|2|0|0|0|0|0|0|0|0|0|1|0|0|0|0|0|0|0|0	0.18	0.36	0.18	0.36	0.18	-3.74	3.33	0.44
ZNF322	Q9BXW7	CECR5	0|2	2	1	2	0|0|0|0|0|0|0|0|0|0|0|0|0|0|0|0|0|0|0|0|2|0|0|0|0|0|0|0|0|0|1|0|0|0|0|0|0|0|0	0.18	0.36	0.18	0.36	0.18	-3.74	3.33	0.44
ZFP28	P14373	TRIM27	0|2	2	1	2	0|0|0|0|0|0|0|0|0|0|0|0|0|0|0|0|0|0|0|0|0|0|0|0|0|0|0|0|0|1|0|0|0|0|0|0|0|0|0	0.45	0.91	0.45	0.91	0.45	-2.99	10	0.23
FEZF1	P14373	TRIM27	1|1	2	1	2	0|0|0|0|0|0|0|0|0|0|0|0|0|0|0|0|0|0|0|0|0|0|0|0|0|0|0|0|0|1|0|0|0|0|0|0|0|0|0	0	0	0	0	0	-0.68	10	0.88
ZNF331	P14373	TRIM27	1|1	2	1	2	0|0|0|0|0|0|0|0|0|0|0|0|0|0|0|0|0|0|0|0|0|0|0|0|0|0|0|0|0|1|0|0|0|0|0|0|0|0|0	0	0	0	0	0	-0.68	10	0.88
ZNF250	P14373	TRIM27	0|1	1	0.5	2	0|0|0|0|0|0|0|0|0|0|0|0|0|0|0|0|0|0|0|0|0|0|0|0|0|0|0|0|0|1|0|0|0|0|0|0|0|0|0	0	0	0	0	0	-2.99	5	0.88
ZNF189	P14373	TRIM27	1|1	2	1	2	0|0|0|0|0|0|0|0|0|0|0|0|0|0|0|0|0|0|0|0|0|0|0|0|0|0|0|0|0|1|0|0|0|0|0|0|0|0|0	0	0	0	0	0	-0.68	10	0.88
ZNF669	P14373	TRIM27	1|0	1	0.5	2	0|0|0|0|0|0|0|0|0|0|0|0|0|0|0|0|0|0|0|0|0|0|0|0|0|0|0|0|0|1|0|0|0|0|0|0|0|0|0	0	0	0	0	0	-2.99	5	0.88
ZBTB42	P14373	TRIM27	1|0	1	0.5	2	0|0|0|0|0|0|0|0|0|0|0|0|0|0|0|0|0|0|0|0|0|0|0|0|0|0|0|0|0|1|0|0|0|0|0|0|0|0|0	0	0	0	0	0	-2.99	5	0.88
ZNF436	P14373	TRIM27	0|1	1	0.5	2	0|0|0|0|0|0|0|0|0|0|0|0|0|0|0|0|0|0|0|0|0|0|0|0|0|0|0|0|0|1|0|0|0|0|0|0|0|0|0	0	0	0	0	0	-2.99	5	0.88
ZNF768	P14373	TRIM27	9|7	16	8	2	0|0|0|0|0|0|0|0|0|0|0|0|0|0|0|0|0|0|0|0|0|0|0|0|0|0|0|0|0|1|0|0|0|0|0|0|0|0|0	1	1	1	1	1	21.66	80	0
ZNF419	P14373	TRIM27	3|3	6	3	2	0|0|0|0|0|0|0|0|0|0|0|0|0|0|0|0|0|0|0|0|0|0|0|0|0|0|0|0|0|1|0|0|0|0|0|0|0|0|0	1	1	1	1	1	5.71	30	0
ZNF490	P14373	TRIM27	12|8	20	10	2	0|0|0|0|0|0|0|0|0|0|0|0|0|0|0|0|0|0|0|0|0|0|0|0|0|0|0|0|0|1|0|0|0|0|0|0|0|0|0	1	1	1	1	1	26.04	100	0
ZNF513	P14373	TRIM27	1|0	1	0.5	2	0|0|0|0|0|0|0|0|0|0|0|0|0|0|0|0|0|0|0|0|0|0|0|0|0|0|0|0|0|1|0|0|0|0|0|0|0|0|0	0	0	0	0	0	-2.99	5	0.88
ZNF16	P14373	TRIM27	2|0	2	1	2	0|0|0|0|0|0|0|0|0|0|0|0|0|0|0|0|0|0|0|0|0|0|0|0|0|0|0|0|0|1|0|0|0|0|0|0|0|0|0	0.45	0.91	0.45	0.91	0.45	-2.99	10	0.23
ZNF563	P14373	TRIM27	2|2	4	2	2	0|0|0|0|0|0|0|0|0|0|0|0|0|0|0|0|0|0|0|0|0|0|0|0|0|0|0|0|0|1|0|0|0|0|0|0|0|0|0	0.91	0.91	0.91	0.91	0.91	2.31	20	0.02
ZNF667	P14373	TRIM27	8|2	10	5	2	0|0|0|0|0|0|0|0|0|0|0|0|0|0|0|0|0|0|0|0|0|0|0|0|0|0|0|0|0|1|0|0|0|0|0|0|0|0|0	0.95	1	0.95	1	0.95	2.31	50	0.01
OSR2	P06280	GLA	0|1	1	0.5	2	0|0|0|0|0|0|0|0|0|0|0|0|0|0|0|0|0|0|0|0|0|0|0|0|0|0|2|0|0|0|0|0|0|0|0|0|0|0|0	0	0	0	0	0	-3.39	2.5	0.88
ZSCAN30	P06280	GLA	1|2	3	1.5	2	0|0|0|0|0|0|0|0|0|0|0|0|0|0|0|0|0|0|0|0|0|0|0|0|0|0|2|0|0|0|0|0|0|0|0|0|0|0|0	0.24	0.49	0.24	0.49	0.24	-1.35	7.5	0.4
KLF7	O43854	EDIL3	1|0	1	0.5	2	0|0|0|0|0|0|0|0|0|0|0|2|0|0|0|0|0|0|0|0|0|0|0|2|0|0|0|0|0|0|0|0|0|0|0|0|0|0|0	0	0	0	0	0	-4.14	1.25	0.88
ZNF778	O43854	EDIL3	0|1	1	0.5	2	0|0|0|0|0|0|0|0|0|0|0|2|0|0|0|0|0|0|0|0|0|0|0|2|0|0|0|0|0|0|0|0|0|0|0|0|0|0|0	0	0	0	0	0	-4.14	1.25	0.88
ZBTB14	O43854	EDIL3	1|0	1	0.5	2	0|0|0|0|0|0|0|0|0|0|0|2|0|0|0|0|0|0|0|0|0|0|0|2|0|0|0|0|0|0|0|0|0|0|0|0|0|0|0	0	0	0	0	0	-4.14	1.25	0.88
ZNF436	Q9BZG1	RAB34	0|1	1	0.5	2	0|0|0|0|0|0|0|0|0|0|0|0|0|0|0|0|0|0|0|0|0|0|0|0|0|0|0|0|0|0|0|0|0|0|0|0|0|0|0	0	0	0	0	0	-3	5	0.88
ZNF708	Q9BZG1	RAB34	6|6	12	6	2	0|0|0|0|0|0|0|0|0|0|0|0|0|0|0|0|0|0|0|0|0|0|0|0|0|0|0|0|0|0|0|0|0|0|0|0|0|0|0	1	1	1	1	1	8.45	60	0
ZNF768	Q9BZG1	RAB34	4|1	5	2.5	2	0|0|0|0|0|0|0|0|0|0|0|0|0|0|0|0|0|0|0|0|0|0|0|0|0|0|0|0|0|0|0|0|0|0|0|0|0|0|0	0.5	0.99	0.5	0.99	0.5	-0.49	25	0.17
ZFP28	Q9BZG1	RAB34	0|1	1	0.5	2	0|0|0|0|0|0|0|0|0|0|0|0|0|0|0|0|0|0|0|0|0|0|0|0|0|0|0|0|0|0|0|0|0|0|0|0|0|0|0	0	0	0	0	0	-3	5	0.88
ZNF595	Q9BZG1	RAB34	0|1	1	0.5	2	0|0|0|0|0|0|0|0|0|0|0|0|0|0|0|0|0|0|0|0|0|0|0|0|0|0|0|0|0|0|0|0|0|0|0|0|0|0|0	0	0	0	0	0	-3	5	0.88
ZNF669	Q8TAL5	C9orf43	1|2	3	1.5	2	0|0|0|0|0|0|0|0|0|0|0|0|0|0|0|0|0|0|0|0|0|0|0|0|0|0|0|0|0|0|0|0|0|0|0|0|0|0|0	0.41	0.82	0.41	0.82	0.41	-0.49	15	0.28
ZNF582	Q8TAL5	C9orf43	0|1	1	0.5	2	0|0|0|0|0|0|0|0|0|0|0|0|0|0|0|0|0|0|0|0|0|0|0|0|0|0|0|0|0|0|0|0|0|0|0|0|0|0|0	0	0	0	0	0	-3	5	0.88
ZNF18	Q8TAL5	C9orf43	1|0	1	0.5	2	0|0|0|0|0|0|0|0|0|0|0|0|0|0|0|0|0|0|0|0|0|0|0|0|0|0|0|0|0|0|0|0|0|0|0|0|0|0|0	0	0	0	0	0	-3	5	0.88
GLIS1	O43933	PEX1	1|0	1	0.5	2	0|0|0|0|0|0|0|0|0|0|0|0|0|0|0|0|0|0|0|0|0|0|0|0|0|0|0|0|0|0|0|0|0|0|0|0|0|0|0	0	0	0	0	0	-3	5	0.88
ZNF708	Q9BZG8	DPH1	1|0	1	0.5	2	0|0|0|0|0|0|0|0|0|0|0|0|0|0|0|0|0|0|0|0|0|0|0|0|0|0|2|0|0|0|0|0|0|0|0|0|0|0|0	0	0	0	0	0	-3.39	2.5	0.88
ZNF331	Q9BZG8	DPH1	0|2	2	1	2	0|0|0|0|0|0|0|0|0|0|0|0|0|0|0|0|0|0|0|0|0|0|0|0|0|0|2|0|0|0|0|0|0|0|0|0|0|0|0	0.24	0.49	0.24	0.49	0.24	-3.39	5	0.4
KLF7	P43307	SSR1	1|1	2	1	2	0|0|0|0|0|0|0|0|0|0|0|0|0|0|0|0|0|0|1|0|0|0|0|0|0|0|0|0|0|1|3|0|0|0|0|1|0|0|0	0	0	0	0	0	-3.03	1.67	0.88
ZNF708	P43307	SSR1	1|0	1	0.5	2	0|0|0|0|0|0|0|0|0|0|0|0|0|0|0|0|0|0|1|0|0|0|0|0|0|0|0|0|0|1|3|0|0|0|0|1|0|0|0	0	0	0	0	0	-4.85	0.83	0.88
ZNF596	P43307	SSR1	0|1	1	0.5	2	0|0|0|0|0|0|0|0|0|0|0|0|0|0|0|0|0|0|1|0|0|0|0|0|0|0|0|0|0|1|3|0|0|0|0|1|0|0|0	0	0	0	0	0	-4.85	0.83	0.88
ZNF322	P43307	SSR1	1|0	1	0.5	2	0|0|0|0|0|0|0|0|0|0|0|0|0|0|0|0|0|0|1|0|0|0|0|0|0|0|0|0|0|1|3|0|0|0|0|1|0|0|0	0	0	0	0	0	-4.85	0.83	0.88
ZNF490	Q8N2S1	LTBP4	1|0	1	0.5	2	0|0|0|0|0|0|0|0|0|0|0|0|0|0|0|0|0|0|0|0|0|0|0|0|0|0|0|0|0|0|0|0|0|0|0|0|0|0|0	0	0	0	0	0	-3	5	0.88
ZNF768	Q8N2S1	LTBP4	0|1	1	0.5	2	0|0|0|0|0|0|0|0|0|0|0|0|0|0|0|0|0|0|0|0|0|0|0|0|0|0|0|0|0|0|0|0|0|0|0|0|0|0|0	0	0	0	0	0	-3	5	0.88
ZNF667	Q8N2S1	LTBP4	2|1	3	1.5	2	0|0|0|0|0|0|0|0|0|0|0|0|0|0|0|0|0|0|0|0|0|0|0|0|0|0|0|0|0|0|0|0|0|0|0|0|0|0|0	0.41	0.82	0.41	0.82	0.41	-0.49	15	0.28
ZNF140	Q13011	ECH1	0|1	1	0.5	2	0|6|0|0|0|0|0|0|0|0|0|0|0|0|0|3|0|0|4|4|4|0|0|0|0|2|2|1|0|0|2|0|1|0|1|0|0|0|0	0	0	0	0	0	-14.17	0.17	0.88
KLF1	Q13011	ECH1	10|0	10	5	2	0|6|0|0|0|0|0|0|0|0|0|0|0|0|0|3|0|0|4|4|4|0|0|0|0|2|2|1|0|0|2|0|1|0|1|0|0|0|0	0.34	0.68	0.34	0.68	0.34	-14.17	1.72	0.36
ZNF320	Q13011	ECH1	3|0	3	1.5	2	0|6|0|0|0|0|0|0|0|0|0|0|0|0|0|3|0|0|4|4|4|0|0|0|0|2|2|1|0|0|2|0|1|0|1|0|0|0|0	0	0	0	0	0	-14.17	0.52	0.75
ZNF322	Q13011	ECH1	16|19	35	17.5	2	0|6|0|0|0|0|0|0|0|0|0|0|0|0|0|3|0|0|4|4|4|0|0|0|0|2|2|1|0|0|2|0|1|0|1|0|0|0|0	1	1	1	1	1	7.37	6.03	0
MAZ	Q13011	ECH1	0|11	11	5.5	2	0|6|0|0|0|0|0|0|0|0|0|0|0|0|0|3|0|0|4|4|4|0|0|0|0|2|2|1|0|0|2|0|1|0|1|0|0|0|0	0.44	0.87	0.44	0.87	0.44	-14.17	1.9	0.27
ZNF436	Q13011	ECH1	1|0	1	0.5	2	0|6|0|0|0|0|0|0|0|0|0|0|0|0|0|3|0|0|4|4|4|0|0|0|0|2|2|1|0|0|2|0|1|0|1|0|0|0|0	0	0	0	0	0	-14.17	0.17	0.88
SCRT1	Q13011	ECH1	4|0	4	2	2	0|6|0|0|0|0|0|0|0|0|0|0|0|0|0|3|0|0|4|4|4|0|0|0|0|2|2|1|0|0|2|0|1|0|1|0|0|0|0	0	0	0	0	0	-14.17	0.69	0.72
ZSCAN5C	Q13011	ECH1	0|2	2	1	2	0|6|0|0|0|0|0|0|0|0|0|0|0|0|0|3|0|0|4|4|4|0|0|0|0|2|2|1|0|0|2|0|1|0|1|0|0|0|0	0	0	0	0	0	-14.17	0.34	0.77
ZNF594	Q13011	ECH1	6|0	6	3	2	0|6|0|0|0|0|0|0|0|0|0|0|0|0|0|3|0|0|4|4|4|0|0|0|0|2|2|1|0|0|2|0|1|0|1|0|0|0|0	0.01	0.01	0.01	0.01	0.01	-14.17	1.03	0.65
PATZ1	Q13011	ECH1	0|4	4	2	2	0|6|0|0|0|0|0|0|0|0|0|0|0|0|0|3|0|0|4|4|4|0|0|0|0|2|2|1|0|0|2|0|1|0|1|0|0|0|0	0	0	0	0	0	-14.17	0.69	0.72
ZNF394	Q13011	ECH1	2|3	5	2.5	2	0|6|0|0|0|0|0|0|0|0|0|0|0|0|0|3|0|0|4|4|4|0|0|0|0|2|2|1|0|0|2|0|1|0|1|0|0|0|0	0	0	0	0	0	-9.92	0.86	0.75
IKZF3	Q13011	ECH1	6|0	6	3	2	0|6|0|0|0|0|0|0|0|0|0|0|0|0|0|3|0|0|4|4|4|0|0|0|0|2|2|1|0|0|2|0|1|0|1|0|0|0|0	0.01	0.01	0.01	0.01	0.01	-14.17	1.03	0.65
ZSCAN30	Q13011	ECH1	4|5	9	4.5	2	0|6|0|0|0|0|0|0|0|0|0|0|0|0|0|3|0|0|4|4|4|0|0|0|0|2|2|1|0|0|2|0|1|0|1|0|0|0|0	0	0	0	0	0	-6.97	1.55	0.69
IKZF3	Q71DI3	HIST2H3A;HIST2H3C;HIST2H3D	6|8	14	7	2	4|7|1|0|3|0|0|0|0|0|0|2|1|3|0|3|4|0|0|0|6|1|3|0|0|6|7|2|0|6|6|7|14|7|4|6|2|2|2	0	0	0	0	0	-19.25	0.97	0.83
ZNF331	Q71DI3	HIST2H3A;HIST2H3C;HIST2H3D	0|2	2	1	2	4|7|1|0|3|0|0|0|0|0|0|2|1|3|0|3|4|0|0|0|6|1|3|0|0|6|7|2|0|6|6|7|14|7|4|6|2|2|2	0	0	0	0	0	-33.03	0.14	0.88
ZNF250	Q71DI3	HIST2H3A;HIST2H3C;HIST2H3D	4|8	12	6	2	4|7|1|0|3|0|0|0|0|0|0|2|1|3|0|3|4|0|0|0|6|1|3|0|0|6|7|2|0|6|6|7|14|7|4|6|2|2|2	0	0	0	0	0	-22.66	0.83	0.83
ZNF692	Q71DI3	HIST2H3A;HIST2H3C;HIST2H3D	0|2	2	1	2	4|7|1|0|3|0|0|0|0|0|0|2|1|3|0|3|4|0|0|0|6|1|3|0|0|6|7|2|0|6|6|7|14|7|4|6|2|2|2	0	0	0	0	0	-33.03	0.14	0.88
SCRT1	Q71DI3	HIST2H3A;HIST2H3C;HIST2H3D	14|9	23	11.5	2	4|7|1|0|3|0|0|0|0|0|0|2|1|3|0|3|4|0|0|0|6|1|3|0|0|6|7|2|0|6|6|7|14|7|4|6|2|2|2	0	0	0	0	0	-14.89	1.6	0.74
ZNF594	Q71DI3	HIST2H3A;HIST2H3C;HIST2H3D	0|4	4	2	2	4|7|1|0|3|0|0|0|0|0|0|2|1|3|0|3|4|0|0|0|6|1|3|0|0|6|7|2|0|6|6|7|14|7|4|6|2|2|2	0	0	0	0	0	-33.03	0.28	0.85
ZNF419	Q71DI3	HIST2H3A;HIST2H3C;HIST2H3D	2|5	7	3.5	2	4|7|1|0|3|0|0|0|0|0|0|2|1|3|0|3|4|0|0|0|6|1|3|0|0|6|7|2|0|6|6|7|14|7|4|6|2|2|2	0	0	0	0	0	-26.96	0.49	0.85
ZSCAN5C	Q71DI3	HIST2H3A;HIST2H3C;HIST2H3D	6|6	12	6	2	4|7|1|0|3|0|0|0|0|0|0|2|1|3|0|3|4|0|0|0|6|1|3|0|0|6|7|2|0|6|6|7|14|7|4|6|2|2|2	0	0	0	0	0	-19.25	0.83	0.84
ZNF708	Q71DI3	HIST2H3A;HIST2H3C;HIST2H3D	5|3	8	4	2	4|7|1|0|3|0|0|0|0|0|0|2|1|3|0|3|4|0|0|0|6|1|3|0|0|6|7|2|0|6|6|7|14|7|4|6|2|2|2	0	0	0	0	0	-24.67	0.56	0.85
FEZF1	Q71DI3	HIST2H3A;HIST2H3C;HIST2H3D	7|10	17	8.5	2	4|7|1|0|3|0|0|0|0|0|0|2|1|3|0|3|4|0|0|0|6|1|3|0|0|6|7|2|0|6|6|7|14|7|4|6|2|2|2	0	0	0	0	0	-17.78	1.18	0.81
ZBTB14	Q71DI3	HIST2H3A;HIST2H3C;HIST2H3D	4|0	4	2	2	4|7|1|0|3|0|0|0|0|0|0|2|1|3|0|3|4|0|0|0|6|1|3|0|0|6|7|2|0|6|6|7|14|7|4|6|2|2|2	0	0	0	0	0	-33.03	0.28	0.85
ZNF8	Q71DI3	HIST2H3A;HIST2H3C;HIST2H3D	1|3	4	2	2	4|7|1|0|3|0|0|0|0|0|0|2|1|3|0|3|4|0|0|0|6|1|3|0|0|6|7|2|0|6|6|7|14|7|4|6|2|2|2	0	0	0	0	0	-29.65	0.28	0.85
ZFP3	Q71DI3	HIST2H3A;HIST2H3C;HIST2H3D	1|6	7	3.5	2	4|7|1|0|3|0|0|0|0|0|0|2|1|3|0|3|4|0|0|0|6|1|3|0|0|6|7|2|0|6|6|7|14|7|4|6|2|2|2	0	0	0	0	0	-29.65	0.49	0.84
KLF7	Q71DI3	HIST2H3A;HIST2H3C;HIST2H3D	8|7	15	7.5	2	4|7|1|0|3|0|0|0|0|0|0|2|1|3|0|3|4|0|0|0|6|1|3|0|0|6|7|2|0|6|6|7|14|7|4|6|2|2|2	0	0	0	0	0	-17.78	1.04	0.83
ZNF669	Q71DI3	HIST2H3A;HIST2H3C;HIST2H3D	3|0	3	1.5	2	4|7|1|0|3|0|0|0|0|0|0|2|1|3|0|3|4|0|0|0|6|1|3|0|0|6|7|2|0|6|6|7|14|7|4|6|2|2|2	0	0	0	0	0	-33.03	0.21	0.85
ZNF436	Q71DI3	HIST2H3A;HIST2H3C;HIST2H3D	7|8	15	7.5	2	4|7|1|0|3|0|0|0|0|0|0|2|1|3|0|3|4|0|0|0|6|1|3|0|0|6|7|2|0|6|6|7|14|7|4|6|2|2|2	0	0	0	0	0	-17.78	1.04	0.83
ZNF768	Q71DI3	HIST2H3A;HIST2H3C;HIST2H3D	10|0	10	5	2	4|7|1|0|3|0|0|0|0|0|0|2|1|3|0|3|4|0|0|0|6|1|3|0|0|6|7|2|0|6|6|7|14|7|4|6|2|2|2	0	0	0	0	0	-33.03	0.69	0.81
KLF1	Q71DI3	HIST2H3A;HIST2H3C;HIST2H3D	6|2	8	4	2	4|7|1|0|3|0|0|0|0|0|0|2|1|3|0|3|4|0|0|0|6|1|3|0|0|6|7|2|0|6|6|7|14|7|4|6|2|2|2	0	0	0	0	0	-26.96	0.56	0.84
ZIM3	Q71DI3	HIST2H3A;HIST2H3C;HIST2H3D	3|3	6	3	2	4|7|1|0|3|0|0|0|0|0|0|2|1|3|0|3|4|0|0|0|6|1|3|0|0|6|7|2|0|6|6|7|14|7|4|6|2|2|2	0	0	0	0	0	-24.67	0.42	0.85
GLIS1	Q71DI3	HIST2H3A;HIST2H3C;HIST2H3D	1|0	1	0.5	2	4|7|1|0|3|0|0|0|0|0|0|2|1|3|0|3|4|0|0|0|6|1|3|0|0|6|7|2|0|6|6|7|14|7|4|6|2|2|2	0	0	0	0	0	-33.03	0.07	0.88
ZNF320	Q71DI3	HIST2H3A;HIST2H3C;HIST2H3D	8|1	9	4.5	2	4|7|1|0|3|0|0|0|0|0|0|2|1|3|0|3|4|0|0|0|6|1|3|0|0|6|7|2|0|6|6|7|14|7|4|6|2|2|2	0	0	0	0	0	-29.65	0.62	0.83
ZNF322	Q71DI3	HIST2H3A;HIST2H3C;HIST2H3D	6|7	13	6.5	2	4|7|1|0|3|0|0|0|0|0|0|2|1|3|0|3|4|0|0|0|6|1|3|0|0|6|7|2|0|6|6|7|14|7|4|6|2|2|2	0	0	0	0	0	-19.25	0.9	0.83
ZNF596	Q71DI3	HIST2H3A;HIST2H3C;HIST2H3D	1|0	1	0.5	2	4|7|1|0|3|0|0|0|0|0|0|2|1|3|0|3|4|0|0|0|6|1|3|0|0|6|7|2|0|6|6|7|14|7|4|6|2|2|2	0	0	0	0	0	-33.03	0.07	0.88
ZNF329	Q71DI3	HIST2H3A;HIST2H3C;HIST2H3D	2|6	8	4	2	4|7|1|0|3|0|0|0|0|0|0|2|1|3|0|3|4|0|0|0|6|1|3|0|0|6|7|2|0|6|6|7|14|7|4|6|2|2|2	0	0	0	0	0	-26.96	0.56	0.84
OSR2	Q71DI3	HIST2H3A;HIST2H3C;HIST2H3D	8|0	8	4	2	4|7|1|0|3|0|0|0|0|0|0|2|1|3|0|3|4|0|0|0|6|1|3|0|0|6|7|2|0|6|6|7|14|7|4|6|2|2|2	0	0	0	0	0	-33.03	0.56	0.83
ZNF582	Q71DI3	HIST2H3A;HIST2H3C;HIST2H3D	3|4	7	3.5	2	4|7|1|0|3|0|0|0|0|0|0|2|1|3|0|3|4|0|0|0|6|1|3|0|0|6|7|2|0|6|6|7|14|7|4|6|2|2|2	0	0	0	0	0	-24.67	0.49	0.85
MYNN	Q71DI3	HIST2H3A;HIST2H3C;HIST2H3D	5|7	12	6	2	4|7|1|0|3|0|0|0|0|0|0|2|1|3|0|3|4|0|0|0|6|1|3|0|0|6|7|2|0|6|6|7|14|7|4|6|2|2|2	0	0	0	0	0	-20.86	0.83	0.83
ZFP82	Q71DI3	HIST2H3A;HIST2H3C;HIST2H3D	8|6	14	7	2	4|7|1|0|3|0|0|0|0|0|0|2|1|3|0|3|4|0|0|0|6|1|3|0|0|6|7|2|0|6|6|7|14|7|4|6|2|2|2	0	0	0	0	0	-19.25	0.97	0.83
PATZ1	Q71DI3	HIST2H3A;HIST2H3C;HIST2H3D	1|7	8	4	2	4|7|1|0|3|0|0|0|0|0|0|2|1|3|0|3|4|0|0|0|6|1|3|0|0|6|7|2|0|6|6|7|14|7|4|6|2|2|2	0	0	0	0	0	-29.65	0.56	0.83
MAZ	Q71DI3	HIST2H3A;HIST2H3C;HIST2H3D	20|6	26	13	2	4|7|1|0|3|0|0|0|0|0|0|2|1|3|0|3|4|0|0|0|6|1|3|0|0|6|7|2|0|6|6|7|14|7|4|6|2|2|2	0.21	0.42	0.21	0.42	0.21	-19.25	1.81	0.42
ZNF449	Q71DI3	HIST2H3A;HIST2H3C;HIST2H3D	4|0	4	2	2	4|7|1|0|3|0|0|0|0|0|0|2|1|3|0|3|4|0|0|0|6|1|3|0|0|6|7|2|0|6|6|7|14|7|4|6|2|2|2	0	0	0	0	0	-33.03	0.28	0.85
ZNF280A	Q71DI3	HIST2H3A;HIST2H3C;HIST2H3D	5|7	12	6	2	4|7|1|0|3|0|0|0|0|0|0|2|1|3|0|3|4|0|0|0|6|1|3|0|0|6|7|2|0|6|6|7|14|7|4|6|2|2|2	0	0	0	0	0	-20.86	0.83	0.83
GTF3A	Q71DI3	HIST2H3A;HIST2H3C;HIST2H3D	4|4	8	4	2	4|7|1|0|3|0|0|0|0|0|0|2|1|3|0|3|4|0|0|0|6|1|3|0|0|6|7|2|0|6|6|7|14|7|4|6|2|2|2	0	0	0	0	0	-22.66	0.56	0.85
ZNF547	Q71DI3	HIST2H3A;HIST2H3C;HIST2H3D	7|0	7	3.5	2	4|7|1|0|3|0|0|0|0|0|0|2|1|3|0|3|4|0|0|0|6|1|3|0|0|6|7|2|0|6|6|7|14|7|4|6|2|2|2	0	0	0	0	0	-33.03	0.49	0.83
PRDM1	Q71DI3	HIST2H3A;HIST2H3C;HIST2H3D	6|13	19	9.5	2	4|7|1|0|3|0|0|0|0|0|0|2|1|3|0|3|4|0|0|0|6|1|3|0|0|6|7|2|0|6|6|7|14|7|4|6|2|2|2	0	0	0	0	0	-19.25	1.32	0.76
ZNF18	Q71DI3	HIST2H3A;HIST2H3C;HIST2H3D	1|4	5	2.5	2	4|7|1|0|3|0|0|0|0|0|0|2|1|3|0|3|4|0|0|0|6|1|3|0|0|6|7|2|0|6|6|7|14|7|4|6|2|2|2	0	0	0	0	0	-29.65	0.35	0.85
ZNF37A	Q71DI3	HIST2H3A;HIST2H3C;HIST2H3D	2|1	3	1.5	2	4|7|1|0|3|0|0|0|0|0|0|2|1|3|0|3|4|0|0|0|6|1|3|0|0|6|7|2|0|6|6|7|14|7|4|6|2|2|2	0	0	0	0	0	-29.65	0.21	0.88
ZNF563	Q71DI3	HIST2H3A;HIST2H3C;HIST2H3D	2|4	6	3	2	4|7|1|0|3|0|0|0|0|0|0|2|1|3|0|3|4|0|0|0|6|1|3|0|0|6|7|2|0|6|6|7|14|7|4|6|2|2|2	0	0	0	0	0	-26.96	0.42	0.85
ZSCAN30	Q71DI3	HIST2H3A;HIST2H3C;HIST2H3D	12|10	22	11	2	4|7|1|0|3|0|0|0|0|0|0|2|1|3|0|3|4|0|0|0|6|1|3|0|0|6|7|2|0|6|6|7|14|7|4|6|2|2|2	0	0	0	0	0	-13.48	1.53	0.78
ZSCAN30	Q9H8H3	METTL7A	0|1	1	0.5	2	0|0|0|0|0|0|0|0|0|0|0|0|0|0|0|0|0|0|0|0|0|0|0|0|0|0|0|0|0|0|0|0|0|0|0|0|0|0|0	0	0	0	0	0	-3	5	0.88
ZNF322	Q9H8H3	METTL7A	2|1	3	1.5	2	0|0|0|0|0|0|0|0|0|0|0|0|0|0|0|0|0|0|0|0|0|0|0|0|0|0|0|0|0|0|0|0|0|0|0|0|0|0|0	0.41	0.82	0.41	0.82	0.41	-0.49	15	0.28
MAZ	Q09161	NCBP1	1|0	1	0.5	2	0|0|0|0|0|0|0|0|0|0|0|0|0|0|0|0|0|0|0|0|0|0|0|0|0|0|0|0|0|3|0|0|1|0|1|0|0|0|0	0	0	0	0	0	-4.52	1	0.88
ZFP82	Q09161	NCBP1	2|2	4	2	2	0|0|0|0|0|0|0|0|0|0|0|0|0|0|0|0|0|0|0|0|0|0|0|0|0|0|0|0|0|3|0|0|1|0|1|0|0|0|0	0.2	0.2	0.2	0.2	0.2	-1.36	4	0.42
ZNF490	Q8NEM0	MCPH1	1|0	1	0.5	2	0|0|0|0|0|0|0|0|0|0|0|0|0|0|0|0|0|0|0|0|0|0|0|0|0|0|0|0|0|0|0|0|0|0|0|0|0|0|0	0	0	0	0	0	-3	5	0.88
ZNF563	Q8NEM2	SHCBP1	2|6	8	4	2	0|0|0|0|0|0|0|0|0|0|0|0|0|0|0|0|0|0|0|0|0|0|0|0|2|0|0|0|0|0|0|0|0|0|0|0|0|0|0	0.73	0.97	0.73	0.97	0.73	-0.05	20	0.07
FEZF1	Q8NEM2	SHCBP1	1|0	1	0.5	2	0|0|0|0|0|0|0|0|0|0|0|0|0|0|0|0|0|0|0|0|0|0|0|0|2|0|0|0|0|0|0|0|0|0|0|0|0|0|0	0	0	0	0	0	-3.39	2.5	0.88
ZNF331	Q8NEM2	SHCBP1	3|1	4	2	2	0|0|0|0|0|0|0|0|0|0|0|0|0|0|0|0|0|0|0|0|0|0|0|0|2|0|0|0|0|0|0|0|0|0|0|0|0|0|0	0.36	0.73	0.36	0.73	0.36	-1.35	10	0.35
ZNF669	Q6NX49	ZNF544	2|2	4	2	2	0|0|0|0|0|0|0|0|0|0|0|0|0|0|0|0|0|0|0|0|0|0|0|0|0|0|0|0|0|0|0|0|0|0|0|0|0|0|0	0.82	0.82	0.82	0.82	0.82	1.54	20	0.04
ZNF692	Q9Y4G6	TLN2	1|0	1	0.5	2	0|0|0|0|0|0|0|0|0|0|0|0|0|0|0|0|0|0|0|0|0|0|0|0|0|0|0|0|0|0|0|0|1|0|0|0|0|0|0	0	0	0	0	0	-2.99	5	0.88
ZNF320	Q9Y4G6	TLN2	0|1	1	0.5	2	0|0|0|0|0|0|0|0|0|0|0|0|0|0|0|0|0|0|0|0|0|0|0|0|0|0|0|0|0|0|0|0|1|0|0|0|0|0|0	0	0	0	0	0	-2.99	5	0.88
ZNF547	Q5CZA5	ZNF805	3|4	7	3.5	2	0|0|0|0|0|0|0|0|0|0|0|0|0|0|0|0|0|0|0|0|0|0|0|0|1|0|0|0|0|0|0|0|0|0|0|0|0|0|0	1	1	1	1	1	5.71	35	0
ZNF708	Q5CZA5	ZNF805	1|0	1	0.5	2	0|0|0|0|0|0|0|0|0|0|0|0|0|0|0|0|0|0|0|0|0|0|0|0|1|0|0|0|0|0|0|0|0|0|0|0|0|0|0	0	0	0	0	0	-2.99	5	0.88
ZNF513	P08047	SP1	1|0	1	0.5	2	0|0|0|0|0|0|0|0|0|0|0|0|0|0|0|0|0|0|0|0|0|0|0|0|0|0|0|0|0|0|0|0|0|0|0|0|0|0|0	0	0	0	0	0	-3	5	0.88
ZNF610	P08047	SP1	1|1	2	1	2	0|0|0|0|0|0|0|0|0|0|0|0|0|0|0|0|0|0|0|0|0|0|0|0|0|0|0|0|0|0|0|0|0|0|0|0|0|0|0	0	0	0	0	0	-0.49	10	0.88
KLF1	P35241	RDX	1|0	1	0.5	2	0|0|0|0|0|0|0|0|0|0|0|0|0|0|0|0|0|0|0|0|0|0|0|0|0|0|0|0|0|2|1|3|12|3|6|4|6|3|6	0	0	0	0	0	-21.35	0.11	0.88
ZNF547	Q6P280	ZNF529	4|2	6	3	2	0|0|0|0|0|0|0|0|0|0|0|0|0|0|0|0|0|0|0|0|0|0|0|0|0|0|0|0|0|0|0|0|0|0|0|0|0|0|0	0.91	0.99	0.91	0.99	0.91	1.54	30	0.02
ZNF708	O60762	DPM1	2|2	4	2	2	0|0|0|0|0|0|0|0|0|0|0|0|0|0|0|0|0|0|0|0|0|0|0|0|0|0|0|0|0|0|0|0|0|0|0|1|2|0|0	0.36	0.36	0.36	0.36	0.36	-0.58	6.67	0.35
ZNF331	O60762	DPM1	0|1	1	0.5	2	0|0|0|0|0|0|0|0|0|0|0|0|0|0|0|0|0|0|0|0|0|0|0|0|0|0|0|0|0|0|0|0|0|0|0|1|2|0|0	0	0	0	0	0	-3.74	1.67	0.88
MAZ	O60762	DPM1	0|2	2	1	2	0|0|0|0|0|0|0|0|0|0|0|0|0|0|0|0|0|0|0|0|0|0|0|0|0|0|0|0|0|0|0|0|0|0|0|1|2|0|0	0.18	0.36	0.18	0.36	0.18	-3.74	3.33	0.44
ZNF436	O60762	DPM1	0|2	2	1	2	0|0|0|0|0|0|0|0|0|0|0|0|0|0|0|0|0|0|0|0|0|0|0|0|0|0|0|0|0|0|0|0|0|0|0|1|2|0|0	0.18	0.36	0.18	0.36	0.18	-3.74	3.33	0.44
ZNF768	O60762	DPM1	1|1	2	1	2	0|0|0|0|0|0|0|0|0|0|0|0|0|0|0|0|0|0|0|0|0|0|0|0|0|0|0|0|0|0|0|0|0|0|0|1|2|0|0	0	0	0	0	0	-1.94	3.33	0.88
ZFP82	O60762	DPM1	0|1	1	0.5	2	0|0|0|0|0|0|0|0|0|0|0|0|0|0|0|0|0|0|0|0|0|0|0|0|0|0|0|0|0|0|0|0|0|0|0|1|2|0|0	0	0	0	0	0	-3.74	1.67	0.88
PATZ1	O60762	DPM1	0|1	1	0.5	2	0|0|0|0|0|0|0|0|0|0|0|0|0|0|0|0|0|0|0|0|0|0|0|0|0|0|0|0|0|0|0|0|0|0|0|1|2|0|0	0	0	0	0	0	-3.74	1.67	0.88
MAZ	O60763	USO1	18|0	18	9	2	0|0|0|0|0|0|0|0|0|0|0|0|0|0|0|0|0|0|0|0|0|0|0|0|0|0|0|0|0|0|0|0|1|0|1|0|0|0|0	0.5	1	0.5	1	0.5	-3.36	45	0.14
ZNF331	Q14566	MCM6	1|1	2	1	2	0|1|0|0|0|0|0|0|0|0|0|0|0|0|3|2|0|0|1|3|5|0|0|0|1|3|2|0|0|9|0|1|8|1|7|0|0|0|0	0	0	0	0	0	-17.2	0.23	0.88
ZNF250	Q14566	MCM6	9|13	22	11	2	0|1|0|0|0|0|0|0|0|0|0|0|0|0|3|2|0|0|1|3|5|0|0|0|1|3|2|0|0|9|0|1|8|1|7|0|0|0|0	0.12	0.24	0.12	0.24	0.12	-5.16	2.56	0.48
ZNF595	Q14566	MCM6	1|5	6	3	2	0|1|0|0|0|0|0|0|0|0|0|0|0|0|3|2|0|0|1|3|5|0|0|0|1|3|2|0|0|9|0|1|8|1|7|0|0|0|0	0	0	0	0	0	-17.2	0.7	0.78
ZSCAN5C	Q14566	MCM6	1|1	2	1	2	0|1|0|0|0|0|0|0|0|0|0|0|0|0|3|2|0|0|1|3|5|0|0|0|1|3|2|0|0|9|0|1|8|1|7|0|0|0|0	0	0	0	0	0	-17.2	0.23	0.88
SCRT1	Q14566	MCM6	2|4	6	3	2	0|1|0|0|0|0|0|0|0|0|0|0|0|0|3|2|0|0|1|3|5|0|0|0|1|3|2|0|0|9|0|1|8|1|7|0|0|0|0	0	0	0	0	0	-15.03	0.7	0.79
ZNF594	Q14566	MCM6	6|4	10	5	2	0|1|0|0|0|0|0|0|0|0|0|0|0|0|3|2|0|0|1|3|5|0|0|0|1|3|2|0|0|9|0|1|8|1|7|0|0|0|0	0	0	0	0	0	-11.73	1.16	0.76
ZNF490	Q14566	MCM6	5|5	10	5	2	0|1|0|0|0|0|0|0|0|0|0|0|0|0|3|2|0|0|1|3|5|0|0|0|1|3|2|0|0|9|0|1|8|1|7|0|0|0|0	0	0	0	0	0	-10.25	1.16	0.77
ZNF16	Q14566	MCM6	2|1	3	1.5	2	0|1|0|0|0|0|0|0|0|0|0|0|0|0|3|2|0|0|1|3|5|0|0|0|1|3|2|0|0|9|0|1|8|1|7|0|0|0|0	0	0	0	0	0	-17.2	0.35	0.82
ZNF71	Q14566	MCM6	20|17	37	18.5	2	0|1|0|0|0|0|0|0|0|0|0|0|0|0|3|2|0|0|1|3|5|0|0|0|1|3|2|0|0|9|0|1|8|1|7|0|0|0|0	0.93	0.98	0.93	0.98	0.93	2.06	4.3	0.01
ZNF816	Q14566	MCM6	0|2	2	1	2	0|1|0|0|0|0|0|0|0|0|0|0|0|0|3|2|0|0|1|3|5|0|0|0|1|3|2|0|0|9|0|1|8|1|7|0|0|0|0	0	0	0	0	0	-20.07	0.23	0.82
IKZF3	Q14566	MCM6	3|3	6	3	2	0|1|0|0|0|0|0|0|0|0|0|0|0|0|3|2|0|0|1|3|5|0|0|0|1|3|2|0|0|9|0|1|8|1|7|0|0|0|0	0	0	0	0	0	-13.24	0.7	0.8
ZNF140	Q14566	MCM6	1|1	2	1	2	0|1|0|0|0|0|0|0|0|0|0|0|0|0|3|2|0|0|1|3|5|0|0|0|1|3|2|0|0|9|0|1|8|1|7|0|0|0|0	0	0	0	0	0	-17.2	0.23	0.88
ZNF708	Q14566	MCM6	0|4	4	2	2	0|1|0|0|0|0|0|0|0|0|0|0|0|0|3|2|0|0|1|3|5|0|0|0|1|3|2|0|0|9|0|1|8|1|7|0|0|0|0	0	0	0	0	0	-20.07	0.47	0.79
FEZF1	Q14566	MCM6	9|10	19	9.5	2	0|1|0|0|0|0|0|0|0|0|0|0|0|0|3|2|0|0|1|3|5|0|0|0|1|3|2|0|0|9|0|1|8|1|7|0|0|0|0	0.01	0.02	0.01	0.02	0.01	-5.16	2.21	0.63
ZBTB42	Q14566	MCM6	3|0	3	1.5	2	0|1|0|0|0|0|0|0|0|0|0|0|0|0|3|2|0|0|1|3|5|0|0|0|1|3|2|0|0|9|0|1|8|1|7|0|0|0|0	0	0	0	0	0	-20.07	0.35	0.81
ZFP3	Q14566	MCM6	1|2	3	1.5	2	0|1|0|0|0|0|0|0|0|0|0|0|0|0|3|2|0|0|1|3|5|0|0|0|1|3|2|0|0|9|0|1|8|1|7|0|0|0|0	0	0	0	0	0	-17.2	0.35	0.82
KLF7	Q14566	MCM6	1|1	2	1	2	0|1|0|0|0|0|0|0|0|0|0|0|0|0|3|2|0|0|1|3|5|0|0|0|1|3|2|0|0|9|0|1|8|1|7|0|0|0|0	0	0	0	0	0	-17.2	0.23	0.88
ZNF436	Q14566	MCM6	6|1	7	3.5	2	0|1|0|0|0|0|0|0|0|0|0|0|0|0|3|2|0|0|1|3|5|0|0|0|1|3|2|0|0|9|0|1|8|1|7|0|0|0|0	0	0	0	0	0	-17.2	0.81	0.76
ZNF768	Q14566	MCM6	22|22	44	22	2	0|1|0|0|0|0|0|0|0|0|0|0|0|0|3|2|0|0|1|3|5|0|0|0|1|3|2|0|0|9|0|1|8|1|7|0|0|0|0	0.99	0.99	0.99	0.99	0.99	5.18	5.12	0
KLF1	Q14566	MCM6	2|4	6	3	2	0|1|0|0|0|0|0|0|0|0|0|0|0|0|3|2|0|0|1|3|5|0|0|0|1|3|2|0|0|9|0|1|8|1|7|0|0|0|0	0	0	0	0	0	-15.03	0.7	0.79
ZNF418	Q14566	MCM6	1|0	1	0.5	2	0|1|0|0|0|0|0|0|0|0|0|0|0|0|3|2|0|0|1|3|5|0|0|0|1|3|2|0|0|9|0|1|8|1|7|0|0|0|0	0	0	0	0	0	-20.07	0.12	0.88
ZNF513	Q14566	MCM6	2|3	5	2.5	2	0|1|0|0|0|0|0|0|0|0|0|0|0|0|3|2|0|0|1|3|5|0|0|0|1|3|2|0|0|9|0|1|8|1|7|0|0|0|0	0	0	0	0	0	-15.03	0.58	0.8
ZIM3	Q14566	MCM6	5|3	8	4	2	0|1|0|0|0|0|0|0|0|0|0|0|0|0|3|2|0|0|1|3|5|0|0|0|1|3|2|0|0|9|0|1|8|1|7|0|0|0|0	0	0	0	0	0	-13.24	0.93	0.77
ZFP28	Q14566	MCM6	1|2	3	1.5	2	0|1|0|0|0|0|0|0|0|0|0|0|0|0|3|2|0|0|1|3|5|0|0|0|1|3|2|0|0|9|0|1|8|1|7|0|0|0|0	0	0	0	0	0	-17.2	0.35	0.82
ZNF320	Q14566	MCM6	8|4	12	6	2	0|1|0|0|0|0|0|0|0|0|0|0|0|0|3|2|0|0|1|3|5|0|0|0|1|3|2|0|0|9|0|1|8|1|7|0|0|0|0	0	0	0	0	0	-11.73	1.4	0.71
ZNF322	Q14566	MCM6	2|2	4	2	2	0|1|0|0|0|0|0|0|0|0|0|0|0|0|3|2|0|0|1|3|5|0|0|0|1|3|2|0|0|9|0|1|8|1|7|0|0|0|0	0	0	0	0	0	-15.03	0.47	0.81
ZNF329	Q14566	MCM6	1|3	4	2	2	0|1|0|0|0|0|0|0|0|0|0|0|0|0|3|2|0|0|1|3|5|0|0|0|1|3|2|0|0|9|0|1|8|1|7|0|0|0|0	0	0	0	0	0	-17.2	0.47	0.81
ZNF189	Q14566	MCM6	4|4	8	4	2	0|1|0|0|0|0|0|0|0|0|0|0|0|0|3|2|0|0|1|3|5|0|0|0|1|3|2|0|0|9|0|1|8|1|7|0|0|0|0	0	0	0	0	0	-11.73	0.93	0.79
OSR2	Q14566	MCM6	2|1	3	1.5	2	0|1|0|0|0|0|0|0|0|0|0|0|0|0|3|2|0|0|1|3|5|0|0|0|1|3|2|0|0|9|0|1|8|1|7|0|0|0|0	0	0	0	0	0	-17.2	0.35	0.82
MYNN	Q14566	MCM6	0|1	1	0.5	2	0|1|0|0|0|0|0|0|0|0|0|0|0|0|3|2|0|0|1|3|5|0|0|0|1|3|2|0|0|9|0|1|8|1|7|0|0|0|0	0	0	0	0	0	-20.07	0.12	0.88
ZFP82	Q14566	MCM6	6|8	14	7	2	0|1|0|0|0|0|0|0|0|0|0|0|0|0|3|2|0|0|1|3|5|0|0|0|1|3|2|0|0|9|0|1|8|1|7|0|0|0|0	0	0	0	0	0	-8.86	1.63	0.71
PATZ1	Q14566	MCM6	0|4	4	2	2	0|1|0|0|0|0|0|0|0|0|0|0|0|0|3|2|0|0|1|3|5|0|0|0|1|3|2|0|0|9|0|1|8|1|7|0|0|0|0	0	0	0	0	0	-20.07	0.47	0.79
ZNF610	Q14566	MCM6	1|1	2	1	2	0|1|0|0|0|0|0|0|0|0|0|0|0|0|3|2|0|0|1|3|5|0|0|0|1|3|2|0|0|9|0|1|8|1|7|0|0|0|0	0	0	0	0	0	-17.2	0.23	0.88
MAZ	Q14566	MCM6	33|14	47	23.5	2	0|1|0|0|0|0|0|0|0|0|0|0|0|0|3|2|0|0|1|3|5|0|0|0|1|3|2|0|0|9|0|1|8|1|7|0|0|0|0	0.72	1	0.72	1	0.72	-0.27	5.47	0.07
ZNF280A	Q14566	MCM6	9|9	18	9	2	0|1|0|0|0|0|0|0|0|0|0|0|0|0|3|2|0|0|1|3|5|0|0|0|1|3|2|0|0|9|0|1|8|1|7|0|0|0|0	0.01	0.01	0.01	0.01	0.01	-5.16	2.09	0.66
GTF3A	Q14566	MCM6	16|22	38	19	2	0|1|0|0|0|0|0|0|0|0|0|0|0|0|3|2|0|0|1|3|5|0|0|0|1|3|2|0|0|9|0|1|8|1|7|0|0|0|0	0.89	0.99	0.89	0.99	0.89	1.32	4.42	0.03
ZNF547	Q14566	MCM6	4|0	4	2	2	0|1|0|0|0|0|0|0|0|0|0|0|0|0|3|2|0|0|1|3|5|0|0|0|1|3|2|0|0|9|0|1|8|1|7|0|0|0|0	0	0	0	0	0	-20.07	0.47	0.79
PRDM1	Q14566	MCM6	5|9	14	7	2	0|1|0|0|0|0|0|0|0|0|0|0|0|0|3|2|0|0|1|3|5|0|0|0|1|3|2|0|0|9|0|1|8|1|7|0|0|0|0	0	0.01	0	0.01	0	-10.25	1.63	0.68
ZNF419	Q14566	MCM6	6|10	16	8	2	0|1|0|0|0|0|0|0|0|0|0|0|0|0|3|2|0|0|1|3|5|0|0|0|1|3|2|0|0|9|0|1|8|1|7|0|0|0|0	0.01	0.02	0.01	0.02	0.01	-8.86	1.86	0.64
ZNF667	Q14566	MCM6	4|4	8	4	2	0|1|0|0|0|0|0|0|0|0|0|0|0|0|3|2|0|0|1|3|5|0|0|0|1|3|2|0|0|9|0|1|8|1|7|0|0|0|0	0	0	0	0	0	-11.73	0.93	0.79
ZNF770	Q14566	MCM6	3|4	7	3.5	2	0|1|0|0|0|0|0|0|0|0|0|0|0|0|3|2|0|0|1|3|5|0|0|0|1|3|2|0|0|9|0|1|8|1|7|0|0|0|0	0	0	0	0	0	-13.24	0.81	0.79
ZSCAN30	Q14566	MCM6	16|17	33	16.5	2	0|1|0|0|0|0|0|0|0|0|0|0|0|0|3|2|0|0|1|3|5|0|0|0|1|3|2|0|0|9|0|1|8|1|7|0|0|0|0	0.84	0.89	0.84	0.89	0.84	1.32	3.84	0.04
ZNF214	P62714	PPP2CB	1|1	2	1	2	0|4|0|0|0|0|0|0|0|0|0|0|0|0|0|0|0|0|1|0|4|0|0|0|1|0|3|0|0|0|3|5|1|5|3|1|2|0|0	0	0	0	0	0	-12.45	0.32	0.88
ZNF331	P62714	PPP2CB	4|6	10	5	2	0|4|0|0|0|0|0|0|0|0|0|0|0|0|0|0|0|0|1|0|4|0|0|0|1|0|3|0|0|0|3|5|1|5|3|1|2|0|0	0	0.01	0	0.01	0	-7.67	1.61	0.67
ZNF250	P62714	PPP2CB	0|5	5	2.5	2	0|4|0|0|0|0|0|0|0|0|0|0|0|0|0|0|0|0|1|0|4|0|0|0|1|0|3|0|0|0|3|5|1|5|3|1|2|0|0	0	0	0	0	0	-14.99	0.81	0.71
ZNF692	P62714	PPP2CB	2|5	7	3.5	2	0|4|0|0|0|0|0|0|0|0|0|0|0|0|0|0|0|0|1|0|4|0|0|0|1|0|3|0|0|0|3|5|1|5|3|1|2|0|0	0	0	0	0	0	-10.59	1.13	0.71
ZNF595	P62714	PPP2CB	1|1	2	1	2	0|4|0|0|0|0|0|0|0|0|0|0|0|0|0|0|0|0|1|0|4|0|0|0|1|0|3|0|0|0|3|5|1|5|3|1|2|0|0	0	0	0	0	0	-12.45	0.32	0.88
ZNF34	P62714	PPP2CB	1|1	2	1	2	0|4|0|0|0|0|0|0|0|0|0|0|0|0|0|0|0|0|1|0|4|0|0|0|1|0|3|0|0|0|3|5|1|5|3|1|2|0|0	0	0	0	0	0	-12.45	0.32	0.88
ZNF596	P62714	PPP2CB	0|2	2	1	2	0|4|0|0|0|0|0|0|0|0|0|0|0|0|0|0|0|0|1|0|4|0|0|0|1|0|3|0|0|0|3|5|1|5|3|1|2|0|0	0	0	0	0	0	-14.99	0.32	0.78
ZNF667	P62714	PPP2CB	0|1	1	0.5	2	0|4|0|0|0|0|0|0|0|0|0|0|0|0|0|0|0|0|1|0|4|0|0|0|1|0|3|0|0|0|3|5|1|5|3|1|2|0|0	0	0	0	0	0	-14.99	0.16	0.88
ZNF594	P62714	PPP2CB	17|7	24	12	2	0|4|0|0|0|0|0|0|0|0|0|0|0|0|0|0|0|0|1|0|4|0|0|0|1|0|3|0|0|0|3|5|1|5|3|1|2|0|0	0.51	1	0.51	1	0.51	-3.58	3.87	0.12
ZNF490	P62714	PPP2CB	5|5	10	5	2	0|4|0|0|0|0|0|0|0|0|0|0|0|0|0|0|0|0|1|0|4|0|0|0|1|0|3|0|0|0|3|5|1|5|3|1|2|0|0	0	0	0	0	0	-6.27	1.61	0.69
ZNF16	P62714	PPP2CB	0|2	2	1	2	0|4|0|0|0|0|0|0|0|0|0|0|0|0|0|0|0|0|1|0|4|0|0|0|1|0|3|0|0|0|3|5|1|5|3|1|2|0|0	0	0	0	0	0	-14.99	0.32	0.78
ZNF71	P62714	PPP2CB	0|4	4	2	2	0|4|0|0|0|0|0|0|0|0|0|0|0|0|0|0|0|0|1|0|4|0|0|0|1|0|3|0|0|0|3|5|1|5|3|1|2|0|0	0	0	0	0	0	-14.99	0.65	0.74
IKZF3	P62714	PPP2CB	0|2	2	1	2	0|4|0|0|0|0|0|0|0|0|0|0|0|0|0|0|0|0|1|0|4|0|0|0|1|0|3|0|0|0|3|5|1|5|3|1|2|0|0	0	0	0	0	0	-14.99	0.32	0.78
ZNF140	P62714	PPP2CB	1|0	1	0.5	2	0|4|0|0|0|0|0|0|0|0|0|0|0|0|0|0|0|0|1|0|4|0|0|0|1|0|3|0|0|0|3|5|1|5|3|1|2|0|0	0	0	0	0	0	-14.99	0.16	0.88
MZF1	P62714	PPP2CB	1|2	3	1.5	2	0|4|0|0|0|0|0|0|0|0|0|0|0|0|0|0|0|0|1|0|4|0|0|0|1|0|3|0|0|0|3|5|1|5|3|1|2|0|0	0	0	0	0	0	-12.45	0.48	0.78
ZBTB14	P62714	PPP2CB	2|3	5	2.5	2	0|4|0|0|0|0|0|0|0|0|0|0|0|0|0|0|0|0|1|0|4|0|0|0|1|0|3|0|0|0|3|5|1|5|3|1|2|0|0	0	0	0	0	0	-10.59	0.81	0.76
ZBTB42	P62714	PPP2CB	2|1	3	1.5	2	0|4|0|0|0|0|0|0|0|0|0|0|0|0|0|0|0|0|1|0|4|0|0|0|1|0|3|0|0|0|3|5|1|5|3|1|2|0|0	0	0	0	0	0	-12.45	0.48	0.78
ZNF8	P62714	PPP2CB	2|2	4	2	2	0|4|0|0|0|0|0|0|0|0|0|0|0|0|0|0|0|0|1|0|4|0|0|0|1|0|3|0|0|0|3|5|1|5|3|1|2|0|0	0	0	0	0	0	-10.59	0.65	0.77
ZFP3	P62714	PPP2CB	2|2	4	2	2	0|4|0|0|0|0|0|0|0|0|0|0|0|0|0|0|0|0|1|0|4|0|0|0|1|0|3|0|0|0|3|5|1|5|3|1|2|0|0	0	0	0	0	0	-10.59	0.65	0.77
KLF7	P62714	PPP2CB	1|0	1	0.5	2	0|4|0|0|0|0|0|0|0|0|0|0|0|0|0|0|0|0|1|0|4|0|0|0|1|0|3|0|0|0|3|5|1|5|3|1|2|0|0	0	0	0	0	0	-14.99	0.16	0.88
ZNF669	P62714	PPP2CB	3|2	5	2.5	2	0|4|0|0|0|0|0|0|0|0|0|0|0|0|0|0|0|0|1|0|4|0|0|0|1|0|3|0|0|0|3|5|1|5|3|1|2|0|0	0	0	0	0	0	-10.59	0.81	0.76
ZNF436	P62714	PPP2CB	2|2	4	2	2	0|4|0|0|0|0|0|0|0|0|0|0|0|0|0|0|0|0|1|0|4|0|0|0|1|0|3|0|0|0|3|5|1|5|3|1|2|0|0	0	0	0	0	0	-10.59	0.65	0.77
ZNF513	P62714	PPP2CB	1|1	2	1	2	0|4|0|0|0|0|0|0|0|0|0|0|0|0|0|0|0|0|1|0|4|0|0|0|1|0|3|0|0|0|3|5|1|5|3|1|2|0|0	0	0	0	0	0	-12.45	0.32	0.88
ZIM3	P62714	PPP2CB	2|2	4	2	2	0|4|0|0|0|0|0|0|0|0|0|0|0|0|0|0|0|0|1|0|4|0|0|0|1|0|3|0|0|0|3|5|1|5|3|1|2|0|0	0	0	0	0	0	-10.59	0.65	0.77
ZNF184	P62714	PPP2CB	1|0	1	0.5	2	0|4|0|0|0|0|0|0|0|0|0|0|0|0|0|0|0|0|1|0|4|0|0|0|1|0|3|0|0|0|3|5|1|5|3|1|2|0|0	0	0	0	0	0	-14.99	0.16	0.88
ZFP28	P62714	PPP2CB	1|3	4	2	2	0|4|0|0|0|0|0|0|0|0|0|0|0|0|0|0|0|0|1|0|4|0|0|0|1|0|3|0|0|0|3|5|1|5|3|1|2|0|0	0	0	0	0	0	-12.45	0.65	0.76
ZNF320	P62714	PPP2CB	2|4	6	3	2	0|4|0|0|0|0|0|0|0|0|0|0|0|0|0|0|0|0|1|0|4|0|0|0|1|0|3|0|0|0|3|5|1|5|3|1|2|0|0	0	0	0	0	0	-10.59	0.97	0.74
ZNF189	P62714	PPP2CB	2|2	4	2	2	0|4|0|0|0|0|0|0|0|0|0|0|0|0|0|0|0|0|1|0|4|0|0|0|1|0|3|0|0|0|3|5|1|5|3|1|2|0|0	0	0	0	0	0	-10.59	0.65	0.77
ZNF329	P62714	PPP2CB	6|7	13	6.5	2	0|4|0|0|0|0|0|0|0|0|0|0|0|0|0|0|0|0|1|0|4|0|0|0|1|0|3|0|0|0|3|5|1|5|3|1|2|0|0	0.02	0.03	0.02	0.03	0.02	-4.9	2.1	0.62
OSR2	P62714	PPP2CB	3|4	7	3.5	2	0|4|0|0|0|0|0|0|0|0|0|0|0|0|0|0|0|0|1|0|4|0|0|0|1|0|3|0|0|0|3|5|1|5|3|1|2|0|0	0	0	0	0	0	-9.13	1.13	0.73
ZNF582	P62714	PPP2CB	0|1	1	0.5	2	0|4|0|0|0|0|0|0|0|0|0|0|0|0|0|0|0|0|1|0|4|0|0|0|1|0|3|0|0|0|3|5|1|5|3|1|2|0|0	0	0	0	0	0	-14.99	0.16	0.88
MYNN	P62714	PPP2CB	2|2	4	2	2	0|4|0|0|0|0|0|0|0|0|0|0|0|0|0|0|0|0|1|0|4|0|0|0|1|0|3|0|0|0|3|5|1|5|3|1|2|0|0	0	0	0	0	0	-10.59	0.65	0.77
ZFP82	P62714	PPP2CB	4|0	4	2	2	0|4|0|0|0|0|0|0|0|0|0|0|0|0|0|0|0|0|1|0|4|0|0|0|1|0|3|0|0|0|3|5|1|5|3|1|2|0|0	0	0	0	0	0	-14.99	0.65	0.74
PATZ1	P62714	PPP2CB	0|3	3	1.5	2	0|4|0|0|0|0|0|0|0|0|0|0|0|0|0|0|0|0|1|0|4|0|0|0|1|0|3|0|0|0|3|5|1|5|3|1|2|0|0	0	0	0	0	0	-14.99	0.48	0.76
ZNF549	P62714	PPP2CB	1|0	1	0.5	2	0|4|0|0|0|0|0|0|0|0|0|0|0|0|0|0|0|0|1|0|4|0|0|0|1|0|3|0|0|0|3|5|1|5|3|1|2|0|0	0	0	0	0	0	-14.99	0.16	0.88
ZNF394	P62714	PPP2CB	3|3	6	3	2	0|4|0|0|0|0|0|0|0|0|0|0|0|0|0|0|0|0|1|0|4|0|0|0|1|0|3|0|0|0|3|5|1|5|3|1|2|0|0	0	0	0	0	0	-9.13	0.97	0.75
ZNF449	P62714	PPP2CB	0|2	2	1	2	0|4|0|0|0|0|0|0|0|0|0|0|0|0|0|0|0|0|1|0|4|0|0|0|1|0|3|0|0|0|3|5|1|5|3|1|2|0|0	0	0	0	0	0	-14.99	0.32	0.78
ZNF280A	P62714	PPP2CB	3|2	5	2.5	2	0|4|0|0|0|0|0|0|0|0|0|0|0|0|0|0|0|0|1|0|4|0|0|0|1|0|3|0|0|0|3|5|1|5|3|1|2|0|0	0	0	0	0	0	-10.59	0.81	0.76
ZNF547	P62714	PPP2CB	0|8	8	4	2	0|4|0|0|0|0|0|0|0|0|0|0|0|0|0|0|0|0|1|0|4|0|0|0|1|0|3|0|0|0|3|5|1|5|3|1|2|0|0	0.05	0.09	0.05	0.09	0.05	-14.99	1.29	0.56
PRDM1	P62714	PPP2CB	0|1	1	0.5	2	0|4|0|0|0|0|0|0|0|0|0|0|0|0|0|0|0|0|1|0|4|0|0|0|1|0|3|0|0|0|3|5|1|5|3|1|2|0|0	0	0	0	0	0	-14.99	0.16	0.88
ZNF778	P62714	PPP2CB	1|0	1	0.5	2	0|4|0|0|0|0|0|0|0|0|0|0|0|0|0|0|0|0|1|0|4|0|0|0|1|0|3|0|0|0|3|5|1|5|3|1|2|0|0	0	0	0	0	0	-14.99	0.16	0.88
ZNF18	P62714	PPP2CB	0|2	2	1	2	0|4|0|0|0|0|0|0|0|0|0|0|0|0|0|0|0|0|1|0|4|0|0|0|1|0|3|0|0|0|3|5|1|5|3|1|2|0|0	0	0	0	0	0	-14.99	0.32	0.78
ZNF502	P62714	PPP2CB	2|2	4	2	2	0|4|0|0|0|0|0|0|0|0|0|0|0|0|0|0|0|0|1|0|4|0|0|0|1|0|3|0|0|0|3|5|1|5|3|1|2|0|0	0	0	0	0	0	-10.59	0.65	0.77
ZNF563	P62714	PPP2CB	4|3	7	3.5	2	0|4|0|0|0|0|0|0|0|0|0|0|0|0|0|0|0|0|1|0|4|0|0|0|1|0|3|0|0|0|3|5|1|5|3|1|2|0|0	0	0	0	0	0	-9.13	1.13	0.73
ZNF770	P62714	PPP2CB	1|1	2	1	2	0|4|0|0|0|0|0|0|0|0|0|0|0|0|0|0|0|0|1|0|4|0|0|0|1|0|3|0|0|0|3|5|1|5|3|1|2|0|0	0	0	0	0	0	-12.45	0.32	0.88
MAZ	O75940	SMNDC1	0|1	1	0.5	2	0|0|0|0|0|0|0|0|0|0|0|0|0|0|0|0|0|0|0|0|0|0|0|0|0|0|0|0|0|0|0|0|0|0|0|0|0|0|0	0	0	0	0	0	-3	5	0.88
ZNF594	O75940	SMNDC1	2|0	2	1	2	0|0|0|0|0|0|0|0|0|0|0|0|0|0|0|0|0|0|0|0|0|0|0|0|0|0|0|0|0|0|0|0|0|0|0|0|0|0|0	0.41	0.82	0.41	0.82	0.41	-3	10	0.28
ZNF214	Q15185	PTGES3	1|0	1	0.5	2	3|8|3|0|0|0|0|2|4|0|0|0|0|0|1|6|0|0|4|2|10|1|1|0|1|8|8|6|0|4|0|3|2|3|2|0|3|0|0	0	0	0	0	0	-28.15	0.08	0.88
IKZF3	Q15185	PTGES3	13|7	20	10	2	3|8|3|0|0|0|0|2|4|0|0|0|0|0|1|6|0|0|4|2|10|1|1|0|1|8|8|6|0|4|0|3|2|3|2|0|3|0|0	0	0	0	0	0	-13.9	1.64	0.7
ZNF490	Q15185	PTGES3	1|1	2	1	2	3|8|3|0|0|0|0|2|4|0|0|0|0|0|1|6|0|0|4|2|10|1|1|0|1|8|8|6|0|4|0|3|2|3|2|0|3|0|0	0	0	0	0	0	-24.94	0.16	0.88
ZNF331	Q15185	PTGES3	4|6	10	5	2	3|8|3|0|0|0|0|2|4|0|0|0|0|0|1|6|0|0|4|2|10|1|1|0|1|8|8|6|0|4|0|3|2|3|2|0|3|0|0	0	0	0	0	0	-18.44	0.82	0.82
ZNF250	Q15185	PTGES3	2|4	6	3	2	3|8|3|0|0|0|0|2|4|0|0|0|0|0|1|6|0|0|4|2|10|1|1|0|1|8|8|6|0|4|0|3|2|3|2|0|3|0|0	0	0	0	0	0	-22.41	0.49	0.84
GLIS1	Q15185	PTGES3	4|5	9	4.5	2	3|8|3|0|0|0|0|2|4|0|0|0|0|0|1|6|0|0|4|2|10|1|1|0|1|8|8|6|0|4|0|3|2|3|2|0|3|0|0	0	0	0	0	0	-18.44	0.74	0.83
ZNF595	Q15185	PTGES3	0|1	1	0.5	2	3|8|3|0|0|0|0|2|4|0|0|0|0|0|1|6|0|0|4|2|10|1|1|0|1|8|8|6|0|4|0|3|2|3|2|0|3|0|0	0	0	0	0	0	-28.15	0.08	0.88
ZNF257	Q15185	PTGES3	2|0	2	1	2	3|8|3|0|0|0|0|2|4|0|0|0|0|0|1|6|0|0|4|2|10|1|1|0|1|8|8|6|0|4|0|3|2|3|2|0|3|0|0	0	0	0	0	0	-28.15	0.16	0.88
ZNF34	Q15185	PTGES3	1|1	2	1	2	3|8|3|0|0|0|0|2|4|0|0|0|0|0|1|6|0|0|4|2|10|1|1|0|1|8|8|6|0|4|0|3|2|3|2|0|3|0|0	0	0	0	0	0	-24.94	0.16	0.88
SCRT1	Q15185	PTGES3	7|7	14	7	2	3|8|3|0|0|0|0|2|4|0|0|0|0|0|1|6|0|0|4|2|10|1|1|0|1|8|8|6|0|4|0|3|2|3|2|0|3|0|0	0	0	0	0	0	-13.9	1.15	0.81
ZNF594	Q15185	PTGES3	10|5	15	7.5	2	3|8|3|0|0|0|0|2|4|0|0|0|0|0|1|6|0|0|4|2|10|1|1|0|1|8|8|6|0|4|0|3|2|3|2|0|3|0|0	0	0	0	0	0	-16.81	1.23	0.77
ZNF419	Q15185	PTGES3	0|5	5	2.5	2	3|8|3|0|0|0|0|2|4|0|0|0|0|0|1|6|0|0|4|2|10|1|1|0|1|8|8|6|0|4|0|3|2|3|2|0|3|0|0	0	0	0	0	0	-28.15	0.41	0.83
ZNF71	Q15185	PTGES3	0|1	1	0.5	2	3|8|3|0|0|0|0|2|4|0|0|0|0|0|1|6|0|0|4|2|10|1|1|0|1|8|8|6|0|4|0|3|2|3|2|0|3|0|0	0	0	0	0	0	-28.15	0.08	0.88
ZSCAN5C	Q15185	PTGES3	4|6	10	5	2	3|8|3|0|0|0|0|2|4|0|0|0|0|0|1|6|0|0|4|2|10|1|1|0|1|8|8|6|0|4|0|3|2|3|2|0|3|0|0	0	0	0	0	0	-18.44	0.82	0.82
ZBTB6	Q15185	PTGES3	1|0	1	0.5	2	3|8|3|0|0|0|0|2|4|0|0|0|0|0|1|6|0|0|4|2|10|1|1|0|1|8|8|6|0|4|0|3|2|3|2|0|3|0|0	0	0	0	0	0	-28.15	0.08	0.88
ZNF708	Q15185	PTGES3	6|4	10	5	2	3|8|3|0|0|0|0|2|4|0|0|0|0|0|1|6|0|0|4|2|10|1|1|0|1|8|8|6|0|4|0|3|2|3|2|0|3|0|0	0	0	0	0	0	-18.44	0.82	0.82
FEZF1	Q15185	PTGES3	5|6	11	5.5	2	3|8|3|0|0|0|0|2|4|0|0|0|0|0|1|6|0|0|4|2|10|1|1|0|1|8|8|6|0|4|0|3|2|3|2|0|3|0|0	0	0	0	0	0	-16.81	0.9	0.82
MZF1	Q15185	PTGES3	3|2	5	2.5	2	3|8|3|0|0|0|0|2|4|0|0|0|0|0|1|6|0|0|4|2|10|1|1|0|1|8|8|6|0|4|0|3|2|3|2|0|3|0|0	0	0	0	0	0	-22.41	0.41	0.84
ZBTB14	Q15185	PTGES3	6|3	9	4.5	2	3|8|3|0|0|0|0|2|4|0|0|0|0|0|1|6|0|0|4|2|10|1|1|0|1|8|8|6|0|4|0|3|2|3|2|0|3|0|0	0	0	0	0	0	-20.29	0.74	0.82
ZBTB42	Q15185	PTGES3	1|0	1	0.5	2	3|8|3|0|0|0|0|2|4|0|0|0|0|0|1|6|0|0|4|2|10|1|1|0|1|8|8|6|0|4|0|3|2|3|2|0|3|0|0	0	0	0	0	0	-28.15	0.08	0.88
ZNF8	Q15185	PTGES3	2|2	4	2	2	3|8|3|0|0|0|0|2|4|0|0|0|0|0|1|6|0|0|4|2|10|1|1|0|1|8|8|6|0|4|0|3|2|3|2|0|3|0|0	0	0	0	0	0	-22.41	0.33	0.88
KLF7	Q15185	PTGES3	5|1	6	3	2	3|8|3|0|0|0|0|2|4|0|0|0|0|0|1|6|0|0|4|2|10|1|1|0|1|8|8|6|0|4|0|3|2|3|2|0|3|0|0	0	0	0	0	0	-24.94	0.49	0.83
ZNF436	Q15185	PTGES3	7|3	10	5	2	3|8|3|0|0|0|0|2|4|0|0|0|0|0|1|6|0|0|4|2|10|1|1|0|1|8|8|6|0|4|0|3|2|3|2|0|3|0|0	0	0	0	0	0	-20.29	0.82	0.81
ZNF768	Q15185	PTGES3	4|2	6	3	2	3|8|3|0|0|0|0|2|4|0|0|0|0|0|1|6|0|0|4|2|10|1|1|0|1|8|8|6|0|4|0|3|2|3|2|0|3|0|0	0	0	0	0	0	-22.41	0.49	0.84
KLF1	Q15185	PTGES3	8|3	11	5.5	2	3|8|3|0|0|0|0|2|4|0|0|0|0|0|1|6|0|0|4|2|10|1|1|0|1|8|8|6|0|4|0|3|2|3|2|0|3|0|0	0	0	0	0	0	-20.29	0.9	0.8
ZIM3	Q15185	PTGES3	0|5	5	2.5	2	3|8|3|0|0|0|0|2|4|0|0|0|0|0|1|6|0|0|4|2|10|1|1|0|1|8|8|6|0|4|0|3|2|3|2|0|3|0|0	0	0	0	0	0	-28.15	0.41	0.83
ZNF184	Q15185	PTGES3	0|1	1	0.5	2	3|8|3|0|0|0|0|2|4|0|0|0|0|0|1|6|0|0|4|2|10|1|1|0|1|8|8|6|0|4|0|3|2|3|2|0|3|0|0	0	0	0	0	0	-28.15	0.08	0.88
ZNF320	Q15185	PTGES3	5|1	6	3	2	3|8|3|0|0|0|0|2|4|0|0|0|0|0|1|6|0|0|4|2|10|1|1|0|1|8|8|6|0|4|0|3|2|3|2|0|3|0|0	0	0	0	0	0	-24.94	0.49	0.83
ZNF322	Q15185	PTGES3	7|8	15	7.5	2	3|8|3|0|0|0|0|2|4|0|0|0|0|0|1|6|0|0|4|2|10|1|1|0|1|8|8|6|0|4|0|3|2|3|2|0|3|0|0	0	0	0	0	0	-13.9	1.23	0.8
ZNF189	Q15185	PTGES3	0|1	1	0.5	2	3|8|3|0|0|0|0|2|4|0|0|0|0|0|1|6|0|0|4|2|10|1|1|0|1|8|8|6|0|4|0|3|2|3|2|0|3|0|0	0	0	0	0	0	-28.15	0.08	0.88
ZNF329	Q15185	PTGES3	2|0	2	1	2	3|8|3|0|0|0|0|2|4|0|0|0|0|0|1|6|0|0|4|2|10|1|1|0|1|8|8|6|0|4|0|3|2|3|2|0|3|0|0	0	0	0	0	0	-28.15	0.16	0.88
OSR2	Q15185	PTGES3	2|6	8	4	2	3|8|3|0|0|0|0|2|4|0|0|0|0|0|1|6|0|0|4|2|10|1|1|0|1|8|8|6|0|4|0|3|2|3|2|0|3|0|0	0	0	0	0	0	-22.41	0.66	0.82
MYNN	Q15185	PTGES3	2|2	4	2	2	3|8|3|0|0|0|0|2|4|0|0|0|0|0|1|6|0|0|4|2|10|1|1|0|1|8|8|6|0|4|0|3|2|3|2|0|3|0|0	0	0	0	0	0	-22.41	0.33	0.88
ZFP82	Q15185	PTGES3	3|3	6	3	2	3|8|3|0|0|0|0|2|4|0|0|0|0|0|1|6|0|0|4|2|10|1|1|0|1|8|8|6|0|4|0|3|2|3|2|0|3|0|0	0	0	0	0	0	-20.29	0.49	0.84
PATZ1	Q15185	PTGES3	2|9	11	5.5	2	3|8|3|0|0|0|0|2|4|0|0|0|0|0|1|6|0|0|4|2|10|1|1|0|1|8|8|6|0|4|0|3|2|3|2|0|3|0|0	0	0	0	0	0	-22.41	0.9	0.79
ZNF563	Q15185	PTGES3	1|2	3	1.5	2	3|8|3|0|0|0|0|2|4|0|0|0|0|0|1|6|0|0|4|2|10|1|1|0|1|8|8|6|0|4|0|3|2|3|2|0|3|0|0	0	0	0	0	0	-24.94	0.25	0.88
MAZ	Q15185	PTGES3	1|10	11	5.5	2	3|8|3|0|0|0|0|2|4|0|0|0|0|0|1|6|0|0|4|2|10|1|1|0|1|8|8|6|0|4|0|3|2|3|2|0|3|0|0	0	0	0	0	0	-24.94	0.9	0.77
ZNF280A	Q15185	PTGES3	4|3	7	3.5	2	3|8|3|0|0|0|0|2|4|0|0|0|0|0|1|6|0|0|4|2|10|1|1|0|1|8|8|6|0|4|0|3|2|3|2|0|3|0|0	0	0	0	0	0	-20.29	0.57	0.84
GTF3A	Q15185	PTGES3	2|4	6	3	2	3|8|3|0|0|0|0|2|4|0|0|0|0|0|1|6|0|0|4|2|10|1|1|0|1|8|8|6|0|4|0|3|2|3|2|0|3|0|0	0	0	0	0	0	-22.41	0.49	0.84
ZNF547	Q15185	PTGES3	2|2	4	2	2	3|8|3|0|0|0|0|2|4|0|0|0|0|0|1|6|0|0|4|2|10|1|1|0|1|8|8|6|0|4|0|3|2|3|2|0|3|0|0	0	0	0	0	0	-22.41	0.33	0.88
PRDM1	Q15185	PTGES3	1|6	7	3.5	2	3|8|3|0|0|0|0|2|4|0|0|0|0|0|1|6|0|0|4|2|10|1|1|0|1|8|8|6|0|4|0|3|2|3|2|0|3|0|0	0	0	0	0	0	-24.94	0.57	0.82
ZNF778	Q15185	PTGES3	1|2	3	1.5	2	3|8|3|0|0|0|0|2|4|0|0|0|0|0|1|6|0|0|4|2|10|1|1|0|1|8|8|6|0|4|0|3|2|3|2|0|3|0|0	0	0	0	0	0	-24.94	0.25	0.88
ZNF596	Q15185	PTGES3	0|3	3	1.5	2	3|8|3|0|0|0|0|2|4|0|0|0|0|0|1|6|0|0|4|2|10|1|1|0|1|8|8|6|0|4|0|3|2|3|2|0|3|0|0	0	0	0	0	0	-28.15	0.25	0.84
ZNF667	Q15185	PTGES3	1|1	2	1	2	3|8|3|0|0|0|0|2|4|0|0|0|0|0|1|6|0|0|4|2|10|1|1|0|1|8|8|6|0|4|0|3|2|3|2|0|3|0|0	0	0	0	0	0	-24.94	0.16	0.88
ZNF394	Q15185	PTGES3	3|4	7	3.5	2	3|8|3|0|0|0|0|2|4|0|0|0|0|0|1|6|0|0|4|2|10|1|1|0|1|8|8|6|0|4|0|3|2|3|2|0|3|0|0	0	0	0	0	0	-20.29	0.57	0.84
ZNF770	Q15185	PTGES3	0|1	1	0.5	2	3|8|3|0|0|0|0|2|4|0|0|0|0|0|1|6|0|0|4|2|10|1|1|0|1|8|8|6|0|4|0|3|2|3|2|0|3|0|0	0	0	0	0	0	-28.15	0.08	0.88
ZSCAN30	Q15185	PTGES3	4|5	9	4.5	2	3|8|3|0|0|0|0|2|4|0|0|0|0|0|1|6|0|0|4|2|10|1|1|0|1|8|8|6|0|4|0|3|2|3|2|0|3|0|0	0	0	0	0	0	-18.44	0.74	0.83
ZNF140	O75947	ATP5H	0|2	2	1	2	0|0|0|0|0|0|0|0|0|0|0|0|0|0|0|0|0|0|0|0|0|0|0|0|0|0|1|0|0|0|4|0|1|0|1|0|0|0|0	0.07	0.13	0.07	0.13	0.07	-5.32	1.43	0.54
GLIS1	O75947	ATP5H	1|0	1	0.5	2	0|0|0|0|0|0|0|0|0|0|0|0|0|0|0|0|0|0|0|0|0|0|0|0|0|0|1|0|0|0|4|0|1|0|1|0|0|0|0	0	0	0	0	0	-5.32	0.71	0.88
KLF1	O75947	ATP5H	3|0	3	1.5	2	0|0|0|0|0|0|0|0|0|0|0|0|0|0|0|0|0|0|0|0|0|0|0|0|0|0|1|0|0|0|4|0|1|0|1|0|0|0|0	0.13	0.27	0.13	0.27	0.13	-5.32	2.14	0.47
ZNF322	O75947	ATP5H	1|3	4	2	2	0|0|0|0|0|0|0|0|0|0|0|0|0|0|0|0|0|0|0|0|0|0|0|0|0|0|1|0|0|0|4|0|1|0|1|0|0|0|0	0.13	0.27	0.13	0.27	0.13	-3.18	2.86	0.47
MAZ	O75947	ATP5H	0|1	1	0.5	2	0|0|0|0|0|0|0|0|0|0|0|0|0|0|0|0|0|0|0|0|0|0|0|0|0|0|1|0|0|0|4|0|1|0|1|0|0|0|0	0	0	0	0	0	-5.32	0.71	0.88
ZNF594	O75947	ATP5H	2|0	2	1	2	0|0|0|0|0|0|0|0|0|0|0|0|0|0|0|0|0|0|0|0|0|0|0|0|0|0|1|0|0|0|4|0|1|0|1|0|0|0|0	0.07	0.13	0.07	0.13	0.07	-5.32	1.43	0.54
ZNF394	O75947	ATP5H	3|1	4	2	2	0|0|0|0|0|0|0|0|0|0|0|0|0|0|0|0|0|0|0|0|0|0|0|0|0|0|1|0|0|0|4|0|1|0|1|0|0|0|0	0.13	0.27	0.13	0.27	0.13	-3.18	2.86	0.47
ZNF816	O75947	ATP5H	0|2	2	1	2	0|0|0|0|0|0|0|0|0|0|0|0|0|0|0|0|0|0|0|0|0|0|0|0|0|0|1|0|0|0|4|0|1|0|1|0|0|0|0	0.07	0.13	0.07	0.13	0.07	-5.32	1.43	0.54
ZNF770	O75947	ATP5H	1|2	3	1.5	2	0|0|0|0|0|0|0|0|0|0|0|0|0|0|0|0|0|0|0|0|0|0|0|0|0|0|1|0|0|0|4|0|1|0|1|0|0|0|0	0.07	0.13	0.07	0.13	0.07	-3.18	2.14	0.54
ZSCAN30	O75947	ATP5H	2|4	6	3	2	0|0|0|0|0|0|0|0|0|0|0|0|0|0|0|0|0|0|0|0|0|0|0|0|0|0|1|0|0|0|4|0|1|0|1|0|0|0|0	0.28	0.43	0.28	0.43	0.28	-1.86	4.29	0.37
IKZF3	Q15181	PPA1	15|8	23	11.5	2	1|16|0|0|0|0|0|0|0|0|0|0|0|0|0|1|0|0|2|2|13|0|0|0|0|11|12|5|0|3|1|1|3|1|3|0|0|0|0	0	0	0	0	0	-15	1.64	0.73
ZNF331	Q15181	PPA1	1|7	8	4	2	1|16|0|0|0|0|0|0|0|0|0|0|0|0|0|1|0|0|2|2|13|0|0|0|0|11|12|5|0|3|1|1|3|1|3|0|0|0|0	0	0	0	0	0	-28.17	0.57	0.83
ZNF250	Q15181	PPA1	0|9	9	4.5	2	1|16|0|0|0|0|0|0|0|0|0|0|0|0|0|1|0|0|2|2|13|0|0|0|0|11|12|5|0|3|1|1|3|1|3|0|0|0|0	0	0	0	0	0	-31.52	0.64	0.81
SCRT1	Q15181	PPA1	11|3	14	7	2	1|16|0|0|0|0|0|0|0|0|0|0|0|0|0|1|0|0|2|2|13|0|0|0|0|11|12|5|0|3|1|1|3|1|3|0|0|0|0	0	0	0	0	0	-23.25	1	0.79
ZNF594	Q15181	PPA1	13|2	15	7.5	2	1|16|0|0|0|0|0|0|0|0|0|0|0|0|0|1|0|0|2|2|13|0|0|0|0|11|12|5|0|3|1|1|3|1|3|0|0|0|0	0	0	0	0	0	-25.51	1.07	0.76
ZNF71	Q15181	PPA1	0|7	7	3.5	2	1|16|0|0|0|0|0|0|0|0|0|0|0|0|0|1|0|0|2|2|13|0|0|0|0|11|12|5|0|3|1|1|3|1|3|0|0|0|0	0	0	0	0	0	-31.52	0.5	0.83
ZNF816	Q15181	PPA1	0|1	1	0.5	2	1|16|0|0|0|0|0|0|0|0|0|0|0|0|0|1|0|0|2|2|13|0|0|0|0|11|12|5|0|3|1|1|3|1|3|0|0|0|0	0	0	0	0	0	-31.52	0.07	0.88
ZSCAN5C	Q15181	PPA1	0|3	3	1.5	2	1|16|0|0|0|0|0|0|0|0|0|0|0|0|0|1|0|0|2|2|13|0|0|0|0|11|12|5|0|3|1|1|3|1|3|0|0|0|0	0	0	0	0	0	-31.52	0.21	0.85
ZNF320	Q15181	PPA1	1|0	1	0.5	2	1|16|0|0|0|0|0|0|0|0|0|0|0|0|0|1|0|0|2|2|13|0|0|0|0|11|12|5|0|3|1|1|3|1|3|0|0|0|0	0	0	0	0	0	-31.52	0.07	0.88
ZNF708	Q15181	PPA1	5|1	6	3	2	1|16|0|0|0|0|0|0|0|0|0|0|0|0|0|1|0|0|2|2|13|0|0|0|0|11|12|5|0|3|1|1|3|1|3|0|0|0|0	0	0	0	0	0	-28.17	0.43	0.84
FEZF1	Q15181	PPA1	2|2	4	2	2	1|16|0|0|0|0|0|0|0|0|0|0|0|0|0|1|0|0|2|2|13|0|0|0|0|11|12|5|0|3|1|1|3|1|3|0|0|0|0	0	0	0	0	0	-25.51	0.29	0.85
ZBTB14	Q15181	PPA1	9|9	18	9	2	1|16|0|0|0|0|0|0|0|0|0|0|0|0|0|1|0|0|2|2|13|0|0|0|0|11|12|5|0|3|1|1|3|1|3|0|0|0|0	0	0	0	0	0	-13.63	1.29	0.8
KLF7	Q15181	PPA1	2|0	2	1	2	1|16|0|0|0|0|0|0|0|0|0|0|0|0|0|1|0|0|2|2|13|0|0|0|0|11|12|5|0|3|1|1|3|1|3|0|0|0|0	0	0	0	0	0	-31.52	0.14	0.86
ZNF436	Q15181	PPA1	5|2	7	3.5	2	1|16|0|0|0|0|0|0|0|0|0|0|0|0|0|1|0|0|2|2|13|0|0|0|0|11|12|5|0|3|1|1|3|1|3|0|0|0|0	0	0	0	0	0	-25.51	0.5	0.84
ZNF768	Q15181	PPA1	3|2	5	2.5	2	1|16|0|0|0|0|0|0|0|0|0|0|0|0|0|1|0|0|2|2|13|0|0|0|0|11|12|5|0|3|1|1|3|1|3|0|0|0|0	0	0	0	0	0	-25.51	0.36	0.85
KLF1	Q15181	PPA1	10|0	10	5	2	1|16|0|0|0|0|0|0|0|0|0|0|0|0|0|1|0|0|2|2|13|0|0|0|0|11|12|5|0|3|1|1|3|1|3|0|0|0|0	0	0	0	0	0	-31.52	0.71	0.8
ZIM3	Q15181	PPA1	0|2	2	1	2	1|16|0|0|0|0|0|0|0|0|0|0|0|0|0|1|0|0|2|2|13|0|0|0|0|11|12|5|0|3|1|1|3|1|3|0|0|0|0	0	0	0	0	0	-31.52	0.14	0.86
ZNF419	Q15181	PPA1	2|3	5	2.5	2	1|16|0|0|0|0|0|0|0|0|0|0|0|0|0|1|0|0|2|2|13|0|0|0|0|11|12|5|0|3|1|1|3|1|3|0|0|0|0	0	0	0	0	0	-25.51	0.36	0.85
ZNF322	Q15181	PPA1	8|14	22	11	2	1|16|0|0|0|0|0|0|0|0|0|0|0|0|0|1|0|0|2|2|13|0|0|0|0|11|12|5|0|3|1|1|3|1|3|0|0|0|0	0	0	0	0	0	-15	1.57	0.74
OSR2	Q15181	PPA1	0|1	1	0.5	2	1|16|0|0|0|0|0|0|0|0|0|0|0|0|0|1|0|0|2|2|13|0|0|0|0|11|12|5|0|3|1|1|3|1|3|0|0|0|0	0	0	0	0	0	-31.52	0.07	0.88
MYNN	Q15181	PPA1	0|1	1	0.5	2	1|16|0|0|0|0|0|0|0|0|0|0|0|0|0|1|0|0|2|2|13|0|0|0|0|11|12|5|0|3|1|1|3|1|3|0|0|0|0	0	0	0	0	0	-31.52	0.07	0.88
ZFP82	Q15181	PPA1	4|2	6	3	2	1|16|0|0|0|0|0|0|0|0|0|0|0|0|0|1|0|0|2|2|13|0|0|0|0|11|12|5|0|3|1|1|3|1|3|0|0|0|0	0	0	0	0	0	-25.51	0.43	0.85
PATZ1	Q15181	PPA1	0|9	9	4.5	2	1|16|0|0|0|0|0|0|0|0|0|0|0|0|0|1|0|0|2|2|13|0|0|0|0|11|12|5|0|3|1|1|3|1|3|0|0|0|0	0	0	0	0	0	-31.52	0.64	0.81
MAZ	Q15181	PPA1	0|18	18	9	2	1|16|0|0|0|0|0|0|0|0|0|0|0|0|0|1|0|0|2|2|13|0|0|0|0|11|12|5|0|3|1|1|3|1|3|0|0|0|0	0	0.01	0	0.01	0	-31.52	1.29	0.66
PRDM1	Q15181	PPA1	0|3	3	1.5	2	1|16|0|0|0|0|0|0|0|0|0|0|0|0|0|1|0|0|2|2|13|0|0|0|0|11|12|5|0|3|1|1|3|1|3|0|0|0|0	0	0	0	0	0	-31.52	0.21	0.85
ZNF596	Q15181	PPA1	0|1	1	0.5	2	1|16|0|0|0|0|0|0|0|0|0|0|0|0|0|1|0|0|2|2|13|0|0|0|0|11|12|5|0|3|1|1|3|1|3|0|0|0|0	0	0	0	0	0	-31.52	0.07	0.88
ZNF394	Q15181	PPA1	2|0	2	1	2	1|16|0|0|0|0|0|0|0|0|0|0|0|0|0|1|0|0|2|2|13|0|0|0|0|11|12|5|0|3|1|1|3|1|3|0|0|0|0	0	0	0	0	0	-31.52	0.14	0.86
ZSCAN30	Q15181	PPA1	12|13	25	12.5	2	1|16|0|0|0|0|0|0|0|0|0|0|0|0|0|1|0|0|2|2|13|0|0|0|0|11|12|5|0|3|1|1|3|1|3|0|0|0|0	0	0	0	0	0	-10.03	1.79	0.75
ZNF214	P17844	DDX5	1|3	4	2	2	0|2|0|0|0|0|0|0|0|0|0|2|0|2|8|10|5|0|4|3|3|2|3|1|3|4|2|0|0|35|18|12|35|12|16|0|1|12|7	0	0	0	0	0	-69.46	0.12	0.88
IKZF3	P17844	DDX5	10|25	35	17.5	2	0|2|0|0|0|0|0|0|0|0|0|2|0|2|8|10|5|0|4|3|3|2|3|1|3|4|2|0|0|35|18|12|35|12|16|0|1|12|7	0	0	0	0	0	-46.57	1.06	0.85
ZNF331	P17844	DDX5	1|1	2	1	2	0|2|0|0|0|0|0|0|0|0|0|2|0|2|8|10|5|0|4|3|3|2|3|1|3|4|2|0|0|35|18|12|35|12|16|0|1|12|7	0	0	0	0	0	-69.46	0.06	0.88
ZNF250	P17844	DDX5	21|24	45	22.5	2	0|2|0|0|0|0|0|0|0|0|0|2|0|2|8|10|5|0|4|3|3|2|3|1|3|4|2|0|0|35|18|12|35|12|16|0|1|12|7	0	0	0	0	0	-29.74	1.36	0.86
ZNF595	P17844	DDX5	3|4	7	3.5	2	0|2|0|0|0|0|0|0|0|0|0|2|0|2|8|10|5|0|4|3|3|2|3|1|3|4|2|0|0|35|18|12|35|12|16|0|1|12|7	0	0	0	0	0	-62.82	0.21	0.88
ZNF257	P17844	DDX5	4|1	5	2.5	2	0|2|0|0|0|0|0|0|0|0|0|2|0|2|8|10|5|0|4|3|3|2|3|1|3|4|2|0|0|35|18|12|35|12|16|0|1|12|7	0	0	0	0	0	-69.46	0.15	0.88
ZNF34	P17844	DDX5	3|6	9	4.5	2	0|2|0|0|0|0|0|0|0|0|0|2|0|2|8|10|5|0|4|3|3|2|3|1|3|4|2|0|0|35|18|12|35|12|16|0|1|12|7	0	0	0	0	0	-62.82	0.27	0.88
ZNF18	P17844	DDX5	3|4	7	3.5	2	0|2|0|0|0|0|0|0|0|0|0|2|0|2|8|10|5|0|4|3|3|2|3|1|3|4|2|0|0|35|18|12|35|12|16|0|1|12|7	0	0	0	0	0	-62.82	0.21	0.88
ZNF594	P17844	DDX5	1|2	3	1.5	2	0|2|0|0|0|0|0|0|0|0|0|2|0|2|8|10|5|0|4|3|3|2|3|1|3|4|2|0|0|35|18|12|35|12|16|0|1|12|7	0	0	0	0	0	-69.46	0.09	0.88
ZNF490	P17844	DDX5	6|7	13	6.5	2	0|2|0|0|0|0|0|0|0|0|0|2|0|2|8|10|5|0|4|3|3|2|3|1|3|4|2|0|0|35|18|12|35|12|16|0|1|12|7	0	0	0	0	0	-54.96	0.39	0.88
ZNF16	P17844	DDX5	5|3	8	4	2	0|2|0|0|0|0|0|0|0|0|0|2|0|2|8|10|5|0|4|3|3|2|3|1|3|4|2|0|0|35|18|12|35|12|16|0|1|12|7	0	0	0	0	0	-62.82	0.24	0.88
ZNF71	P17844	DDX5	4|0	4	2	2	0|2|0|0|0|0|0|0|0|0|0|2|0|2|8|10|5|0|4|3|3|2|3|1|3|4|2|0|0|35|18|12|35|12|16|0|1|12|7	0	0	0	0	0	-73.66	0.12	0.88
ZNF816	P17844	DDX5	2|6	8	4	2	0|2|0|0|0|0|0|0|0|0|0|2|0|2|8|10|5|0|4|3|3|2|3|1|3|4|2|0|0|35|18|12|35|12|16|0|1|12|7	0	0	0	0	0	-65.94	0.24	0.88
ZSCAN5C	P17844	DDX5	8|12	20	10	2	0|2|0|0|0|0|0|0|0|0|0|2|0|2|8|10|5|0|4|3|3|2|3|1|3|4|2|0|0|35|18|12|35|12|16|0|1|12|7	0	0	0	0	0	-50.53	0.61	0.87
ZBTB6	P17844	DDX5	2|3	5	2.5	2	0|2|0|0|0|0|0|0|0|0|0|2|0|2|8|10|5|0|4|3|3|2|3|1|3|4|2|0|0|35|18|12|35|12|16|0|1|12|7	0	0	0	0	0	-65.94	0.15	0.88
ZNF140	P17844	DDX5	2|3	5	2.5	2	0|2|0|0|0|0|0|0|0|0|0|2|0|2|8|10|5|0|4|3|3|2|3|1|3|4|2|0|0|35|18|12|35|12|16|0|1|12|7	0	0	0	0	0	-65.94	0.15	0.88
ZNF708	P17844	DDX5	17|17	34	17	2	0|2|0|0|0|0|0|0|0|0|0|2|0|2|8|10|5|0|4|3|3|2|3|1|3|4|2|0|0|35|18|12|35|12|16|0|1|12|7	0	0	0	0	0	-35.21	1.03	0.87
FEZF1	P17844	DDX5	3|6	9	4.5	2	0|2|0|0|0|0|0|0|0|0|0|2|0|2|8|10|5|0|4|3|3|2|3|1|3|4|2|0|0|35|18|12|35|12|16|0|1|12|7	0	0	0	0	0	-62.82	0.27	0.88
MZF1	P17844	DDX5	1|0	1	0.5	2	0|2|0|0|0|0|0|0|0|0|0|2|0|2|8|10|5|0|4|3|3|2|3|1|3|4|2|0|0|35|18|12|35|12|16|0|1|12|7	0	0	0	0	0	-73.66	0.03	0.88
KLF1	P17844	DDX5	5|3	8	4	2	0|2|0|0|0|0|0|0|0|0|0|2|0|2|8|10|5|0|4|3|3|2|3|1|3|4|2|0|0|35|18|12|35|12|16|0|1|12|7	0	0	0	0	0	-62.82	0.24	0.88
ZNF547	P17844	DDX5	4|6	10	5	2	0|2|0|0|0|0|0|0|0|0|0|2|0|2|8|10|5|0|4|3|3|2|3|1|3|4|2|0|0|35|18|12|35|12|16|0|1|12|7	0	0	0	0	0	-60	0.3	0.88
ZNF8	P17844	DDX5	13|12	25	12.5	2	0|2|0|0|0|0|0|0|0|0|0|2|0|2|8|10|5|0|4|3|3|2|3|1|3|4|2|0|0|35|18|12|35|12|16|0|1|12|7	0	0	0	0	0	-42.98	0.76	0.87
ZFP3	P17844	DDX5	8|8	16	8	2	0|2|0|0|0|0|0|0|0|0|0|2|0|2|8|10|5|0|4|3|3|2|3|1|3|4|2|0|0|35|18|12|35|12|16|0|1|12|7	0	0	0	0	0	-50.53	0.48	0.87
KLF7	P17844	DDX5	19|4	23	11.5	2	0|2|0|0|0|0|0|0|0|0|0|2|0|2|8|10|5|0|4|3|3|2|3|1|3|4|2|0|0|35|18|12|35|12|16|0|1|12|7	0	0	0	0	0	-60	0.7	0.86
ZNF669	P17844	DDX5	2|12	14	7	2	0|2|0|0|0|0|0|0|0|0|0|2|0|2|8|10|5|0|4|3|3|2|3|1|3|4|2|0|0|35|18|12|35|12|16|0|1|12|7	0	0	0	0	0	-65.94	0.42	0.87
ZNF436	P17844	DDX5	22|9	31	15.5	2	0|2|0|0|0|0|0|0|0|0|0|2|0|2|8|10|5|0|4|3|3|2|3|1|3|4|2|0|0|35|18|12|35|12|16|0|1|12|7	0	0	0	0	0	-48.5	0.94	0.86
ZNF768	P17844	DDX5	19|20	39	19.5	2	0|2|0|0|0|0|0|0|0|0|0|2|0|2|8|10|5|0|4|3|3|2|3|1|3|4|2|0|0|35|18|12|35|12|16|0|1|12|7	0	0	0	0	0	-32.39	1.18	0.86
ZNF419	P17844	DDX5	16|15	31	15.5	2	0|2|0|0|0|0|0|0|0|0|0|2|0|2|8|10|5|0|4|3|3|2|3|1|3|4|2|0|0|35|18|12|35|12|16|0|1|12|7	0	0	0	0	0	-38.17	0.94	0.87
ZNF418	P17844	DDX5	4|6	10	5	2	0|2|0|0|0|0|0|0|0|0|0|2|0|2|8|10|5|0|4|3|3|2|3|1|3|4|2|0|0|35|18|12|35|12|16|0|1|12|7	0	0	0	0	0	-60	0.3	0.88
ZNF513	P17844	DDX5	6|5	11	5.5	2	0|2|0|0|0|0|0|0|0|0|0|2|0|2|8|10|5|0|4|3|3|2|3|1|3|4|2|0|0|35|18|12|35|12|16|0|1|12|7	0	0	0	0	0	-57.39	0.33	0.88
ZNF667	P17844	DDX5	5|5	10	5	2	0|2|0|0|0|0|0|0|0|0|0|2|0|2|8|10|5|0|4|3|3|2|3|1|3|4|2|0|0|35|18|12|35|12|16|0|1|12|7	0	0	0	0	0	-57.39	0.3	0.88
ZNF184	P17844	DDX5	4|5	9	4.5	2	0|2|0|0|0|0|0|0|0|0|0|2|0|2|8|10|5|0|4|3|3|2|3|1|3|4|2|0|0|35|18|12|35|12|16|0|1|12|7	0	0	0	0	0	-60	0.27	0.88
ZFP28	P17844	DDX5	2|4	6	3	2	0|2|0|0|0|0|0|0|0|0|0|2|0|2|8|10|5|0|4|3|3|2|3|1|3|4|2|0|0|35|18|12|35|12|16|0|1|12|7	0	0	0	0	0	-65.94	0.18	0.88
GLIS1	P17844	DDX5	1|1	2	1	2	0|2|0|0|0|0|0|0|0|0|0|2|0|2|8|10|5|0|4|3|3|2|3|1|3|4|2|0|0|35|18|12|35|12|16|0|1|12|7	0	0	0	0	0	-69.46	0.06	0.88
ZNF320	P17844	DDX5	21|18	39	19.5	2	0|2|0|0|0|0|0|0|0|0|0|2|0|2|8|10|5|0|4|3|3|2|3|1|3|4|2|0|0|35|18|12|35|12|16|0|1|12|7	0	0	0	0	0	-33.78	1.18	0.86
ZNF189	P17844	DDX5	3|3	6	3	2	0|2|0|0|0|0|0|0|0|0|0|2|0|2|8|10|5|0|4|3|3|2|3|1|3|4|2|0|0|35|18|12|35|12|16|0|1|12|7	0	0	0	0	0	-62.82	0.18	0.88
ZNF329	P17844	DDX5	9|11	20	10	2	0|2|0|0|0|0|0|0|0|0|0|2|0|2|8|10|5|0|4|3|3|2|3|1|3|4|2|0|0|35|18|12|35|12|16|0|1|12|7	0	0	0	0	0	-48.5	0.61	0.87
OSR2	P17844	DDX5	11|9	20	10	2	0|2|0|0|0|0|0|0|0|0|0|2|0|2|8|10|5|0|4|3|3|2|3|1|3|4|2|0|0|35|18|12|35|12|16|0|1|12|7	0	0	0	0	0	-48.5	0.61	0.87
ZIM3	P17844	DDX5	2|0	2	1	2	0|2|0|0|0|0|0|0|0|0|0|2|0|2|8|10|5|0|4|3|3|2|3|1|3|4|2|0|0|35|18|12|35|12|16|0|1|12|7	0	0	0	0	0	-73.66	0.06	0.88
ZNF582	P17844	DDX5	0|2	2	1	2	0|2|0|0|0|0|0|0|0|0|0|2|0|2|8|10|5|0|4|3|3|2|3|1|3|4|2|0|0|35|18|12|35|12|16|0|1|12|7	0	0	0	0	0	-73.66	0.06	0.88
MYNN	P17844	DDX5	3|4	7	3.5	2	0|2|0|0|0|0|0|0|0|0|0|2|0|2|8|10|5|0|4|3|3|2|3|1|3|4|2|0|0|35|18|12|35|12|16|0|1|12|7	0	0	0	0	0	-62.82	0.21	0.88
ZFP82	P17844	DDX5	11|13	24	12	2	0|2|0|0|0|0|0|0|0|0|0|2|0|2|8|10|5|0|4|3|3|2|3|1|3|4|2|0|0|35|18|12|35|12|16|0|1|12|7	0	0	0	0	0	-44.74	0.73	0.87
PATZ1	P17844	DDX5	4|10	14	7	2	0|2|0|0|0|0|0|0|0|0|0|2|0|2|8|10|5|0|4|3|3|2|3|1|3|4|2|0|0|35|18|12|35|12|16|0|1|12|7	0	0	0	0	0	-60	0.42	0.87
ZNF394	P17844	DDX5	1|0	1	0.5	2	0|2|0|0|0|0|0|0|0|0|0|2|0|2|8|10|5|0|4|3|3|2|3|1|3|4|2|0|0|35|18|12|35|12|16|0|1|12|7	0	0	0	0	0	-73.66	0.03	0.88
ZNF610	P17844	DDX5	2|3	5	2.5	2	0|2|0|0|0|0|0|0|0|0|0|2|0|2|8|10|5|0|4|3|3|2|3|1|3|4|2|0|0|35|18|12|35|12|16|0|1|12|7	0	0	0	0	0	-65.94	0.15	0.88
ZNF502	P17844	DDX5	2|2	4	2	2	0|2|0|0|0|0|0|0|0|0|0|2|0|2|8|10|5|0|4|3|3|2|3|1|3|4|2|0|0|35|18|12|35|12|16|0|1|12|7	0	0	0	0	0	-65.94	0.12	0.88
ZNF692	P17844	DDX5	0|1	1	0.5	2	0|2|0|0|0|0|0|0|0|0|0|2|0|2|8|10|5|0|4|3|3|2|3|1|3|4|2|0|0|35|18|12|35|12|16|0|1|12|7	0	0	0	0	0	-73.66	0.03	0.88
ZNF563	P17844	DDX5	2|4	6	3	2	0|2|0|0|0|0|0|0|0|0|0|2|0|2|8|10|5|0|4|3|3|2|3|1|3|4|2|0|0|35|18|12|35|12|16|0|1|12|7	0	0	0	0	0	-65.94	0.18	0.88
MAZ	P17844	DDX5	2|10	12	6	2	0|2|0|0|0|0|0|0|0|0|0|2|0|2|8|10|5|0|4|3|3|2|3|1|3|4|2|0|0|35|18|12|35|12|16|0|1|12|7	0	0	0	0	0	-65.94	0.36	0.87
ZNF449	P17844	DDX5	21|6	27	13.5	2	0|2|0|0|0|0|0|0|0|0|0|2|0|2|8|10|5|0|4|3|3|2|3|1|3|4|2|0|0|35|18|12|35|12|16|0|1|12|7	0	0	0	0	0	-54.96	0.82	0.86
ZNF280A	P17844	DDX5	16|15	31	15.5	2	0|2|0|0|0|0|0|0|0|0|0|2|0|2|8|10|5|0|4|3|3|2|3|1|3|4|2|0|0|35|18|12|35|12|16|0|1|12|7	0	0	0	0	0	-38.17	0.94	0.87
GTF3A	P17844	DDX5	7|4	11	5.5	2	0|2|0|0|0|0|0|0|0|0|0|2|0|2|8|10|5|0|4|3|3|2|3|1|3|4|2|0|0|35|18|12|35|12|16|0|1|12|7	0	0	0	0	0	-60	0.33	0.88
ZBTB42	P17844	DDX5	5|7	12	6	2	0|2|0|0|0|0|0|0|0|0|0|2|0|2|8|10|5|0|4|3|3|2|3|1|3|4|2|0|0|35|18|12|35|12|16|0|1|12|7	0	0	0	0	0	-57.39	0.36	0.88
PRDM1	P17844	DDX5	11|19	30	15	2	0|2|0|0|0|0|0|0|0|0|0|2|0|2|8|10|5|0|4|3|3|2|3|1|3|4|2|0|0|35|18|12|35|12|16|0|1|12|7	0	0	0	0	0	-44.74	0.91	0.86
ZNF778	P17844	DDX5	7|5	12	6	2	0|2|0|0|0|0|0|0|0|0|0|2|0|2|8|10|5|0|4|3|3|2|3|1|3|4|2|0|0|35|18|12|35|12|16|0|1|12|7	0	0	0	0	0	-57.39	0.36	0.88
SCRT1	P17844	DDX5	3|2	5	2.5	2	0|2|0|0|0|0|0|0|0|0|0|2|0|2|8|10|5|0|4|3|3|2|3|1|3|4|2|0|0|35|18|12|35|12|16|0|1|12|7	0	0	0	0	0	-65.94	0.15	0.88
ZNF37A	P17844	DDX5	3|1	4	2	2	0|2|0|0|0|0|0|0|0|0|0|2|0|2|8|10|5|0|4|3|3|2|3|1|3|4|2|0|0|35|18|12|35|12|16|0|1|12|7	0	0	0	0	0	-69.46	0.12	0.88
ZNF549	P17844	DDX5	4|5	9	4.5	2	0|2|0|0|0|0|0|0|0|0|0|2|0|2|8|10|5|0|4|3|3|2|3|1|3|4|2|0|0|35|18|12|35|12|16|0|1|12|7	0	0	0	0	0	-60	0.27	0.88
ZNF770	P17844	DDX5	8|3	11	5.5	2	0|2|0|0|0|0|0|0|0|0|0|2|0|2|8|10|5|0|4|3|3|2|3|1|3|4|2|0|0|35|18|12|35|12|16|0|1|12|7	0	0	0	0	0	-62.82	0.33	0.88
ZSCAN30	P17844	DDX5	8|9	17	8.5	2	0|2|0|0|0|0|0|0|0|0|0|2|0|2|8|10|5|0|4|3|3|2|3|1|3|4|2|0|0|35|18|12|35|12|16|0|1|12|7	0	0	0	0	0	-50.53	0.52	0.87
ZFP28	Q14587	ZNF268	1|1	2	1	2	0|0|0|0|0|0|0|0|0|0|0|0|0|0|0|0|0|0|0|0|0|0|0|0|0|0|0|0|0|0|0|0|0|0|0|0|0|0|0	0	0	0	0	0	-0.49	10	0.88
ZNF419	Q14587	ZNF268	3|0	3	1.5	2	0|0|0|0|0|0|0|0|0|0|0|0|0|0|0|0|0|0|0|0|0|0|0|0|0|0|0|0|0|0|0|0|0|0|0|0|0|0|0	0.48	0.97	0.48	0.97	0.48	-3	15	0.19
ZNF547	Q14586	ZNF267	0|3	3	1.5	2	0|0|0|0|0|0|0|0|0|0|0|0|0|0|0|0|0|0|0|0|0|0|0|0|0|0|0|0|0|1|0|0|0|0|0|0|0|0|0	0.5	1	0.5	1	0.5	-2.99	15	0.16
ZNF419	Q14586	ZNF267	1|5	6	3	2	0|0|0|0|0|0|0|0|0|0|0|0|0|0|0|0|0|0|0|0|0|0|0|0|0|0|0|0|0|1|0|0|0|0|0|0|0|0|0	0.5	1	0.5	1	0.5	-0.68	30	0.14
ZFP82	Q14586	ZNF267	1|5	6	3	2	0|0|0|0|0|0|0|0|0|0|0|0|0|0|0|0|0|0|0|0|0|0|0|0|0|0|0|0|0|1|0|0|0|0|0|0|0|0|0	0.5	1	0.5	1	0.5	-0.68	30	0.14
ZNF708	Q10571	MN1	0|1	1	0.5	2	0|0|0|0|0|0|0|0|0|0|0|0|0|0|0|0|0|0|0|0|0|0|0|1|0|0|0|0|0|0|0|0|0|0|0|0|0|0|0	0	0	0	0	0	-2.99	5	0.88
ZNF189	Q10571	MN1	1|1	2	1	2	0|0|0|0|0|0|0|0|0|0|0|0|0|0|0|0|0|0|0|0|0|0|0|1|0|0|0|0|0|0|0|0|0|0|0|0|0|0|0	0	0	0	0	0	-0.68	10	0.88
ZNF778	Q10571	MN1	0|1	1	0.5	2	0|0|0|0|0|0|0|0|0|0|0|0|0|0|0|0|0|0|0|0|0|0|0|1|0|0|0|0|0|0|0|0|0|0|0|0|0|0|0	0	0	0	0	0	-2.99	5	0.88
ZNF770	Q10571	MN1	1|0	1	0.5	2	0|0|0|0|0|0|0|0|0|0|0|0|0|0|0|0|0|0|0|0|0|0|0|1|0|0|0|0|0|0|0|0|0|0|0|0|0|0|0	0	0	0	0	0	-2.99	5	0.88
ZNF595	Q10571	MN1	1|0	1	0.5	2	0|0|0|0|0|0|0|0|0|0|0|0|0|0|0|0|0|0|0|0|0|0|0|1|0|0|0|0|0|0|0|0|0|0|0|0|0|0|0	0	0	0	0	0	-2.99	5	0.88
ZFP82	O94906	PRPF6	0|1	1	0.5	2	0|0|0|0|0|0|0|0|0|0|0|0|0|0|0|0|0|0|0|0|0|0|0|0|0|0|0|0|0|2|4|0|2|0|1|0|0|5|3	0	0	0	0	0	-8.98	0.29	0.88
ZNF816	O94905	ERLIN2	0|2	2	1	2	0|1|0|0|0|0|0|0|0|0|0|0|0|0|0|0|0|0|2|0|0|0|0|0|0|0|0|0|0|1|5|0|2|0|0|1|0|0|0	0.01	0.03	0.01	0.03	0.01	-6.73	0.83	0.63
ZNF770	O94905	ERLIN2	0|1	1	0.5	2	0|1|0|0|0|0|0|0|0|0|0|0|0|0|0|0|0|0|2|0|0|0|0|0|0|0|0|0|0|1|5|0|2|0|0|1|0|0|0	0	0	0	0	0	-6.73	0.42	0.88
SCRT1	Q96FF9	CDCA5	1|0	1	0.5	2	0|0|0|0|0|0|0|0|0|0|0|0|0|0|0|0|0|0|0|0|0|0|0|0|0|0|0|0|0|0|0|0|0|0|0|0|0|0|0	0	0	0	0	0	-3	5	0.88
PRDM1	Q96FF9	CDCA5	1|0	1	0.5	2	0|0|0|0|0|0|0|0|0|0|0|0|0|0|0|0|0|0|0|0|0|0|0|0|0|0|0|0|0|0|0|0|0|0|0|0|0|0|0	0	0	0	0	0	-3	5	0.88
ZNF594	Q96FF9	CDCA5	0|1	1	0.5	2	0|0|0|0|0|0|0|0|0|0|0|0|0|0|0|0|0|0|0|0|0|0|0|0|0|0|0|0|0|0|0|0|0|0|0|0|0|0|0	0	0	0	0	0	-3	5	0.88
ZNF140	Q14588	ZNF234	1|0	1	0.5	2	0|0|0|0|0|0|0|0|0|0|0|0|0|0|0|0|0|0|0|0|0|0|0|0|0|0|0|0|0|1|0|0|0|0|0|0|0|0|0	0	0	0	0	0	-2.99	5	0.88
ZFP28	Q14588	ZNF234	1|2	3	1.5	2	0|0|0|0|0|0|0|0|0|0|0|0|0|0|0|0|0|0|0|0|0|0|0|0|0|0|0|0|0|1|0|0|0|0|0|0|0|0|0	0.45	0.91	0.45	0.91	0.45	-0.68	15	0.23
ZNF214	Q14588	ZNF234	1|0	1	0.5	2	0|0|0|0|0|0|0|0|0|0|0|0|0|0|0|0|0|0|0|0|0|0|0|0|0|0|0|0|0|1|0|0|0|0|0|0|0|0|0	0	0	0	0	0	-2.99	5	0.88
ZNF418	Q14588	ZNF234	1|0	1	0.5	2	0|0|0|0|0|0|0|0|0|0|0|0|0|0|0|0|0|0|0|0|0|0|0|0|0|0|0|0|0|1|0|0|0|0|0|0|0|0|0	0	0	0	0	0	-2.99	5	0.88
ZNF669	Q14588	ZNF234	3|3	6	3	2	0|0|0|0|0|0|0|0|0|0|0|0|0|0|0|0|0|0|0|0|0|0|0|0|0|0|0|0|0|1|0|0|0|0|0|0|0|0|0	1	1	1	1	1	5.71	30	0
ZNF547	Q14588	ZNF234	0|1	1	0.5	2	0|0|0|0|0|0|0|0|0|0|0|0|0|0|0|0|0|0|0|0|0|0|0|0|0|0|0|0|0|1|0|0|0|0|0|0|0|0|0	0	0	0	0	0	-2.99	5	0.88
ZNF778	Q14588	ZNF234	1|0	1	0.5	2	0|0|0|0|0|0|0|0|0|0|0|0|0|0|0|0|0|0|0|0|0|0|0|0|0|0|0|0|0|1|0|0|0|0|0|0|0|0|0	0	0	0	0	0	-2.99	5	0.88
ZNF490	Q14588	ZNF234	1|1	2	1	2	0|0|0|0|0|0|0|0|0|0|0|0|0|0|0|0|0|0|0|0|0|0|0|0|0|0|0|0|0|1|0|0|0|0|0|0|0|0|0	0	0	0	0	0	-0.68	10	0.88
ZNF37A	Q14588	ZNF234	1|0	1	0.5	2	0|0|0|0|0|0|0|0|0|0|0|0|0|0|0|0|0|0|0|0|0|0|0|0|0|0|0|0|0|1|0|0|0|0|0|0|0|0|0	0	0	0	0	0	-2.99	5	0.88
ZNF549	Q14588	ZNF234	2|0	2	1	2	0|0|0|0|0|0|0|0|0|0|0|0|0|0|0|0|0|0|0|0|0|0|0|0|0|0|0|0|0|1|0|0|0|0|0|0|0|0|0	0.45	0.91	0.45	0.91	0.45	-2.99	10	0.23
ZNF816	Q14588	ZNF234	0|1	1	0.5	2	0|0|0|0|0|0|0|0|0|0|0|0|0|0|0|0|0|0|0|0|0|0|0|0|0|0|0|0|0|1|0|0|0|0|0|0|0|0|0	0	0	0	0	0	-2.99	5	0.88
MAZ	Q2TAY7	SMU1	0|3	3	1.5	2	0|0|0|0|0|0|0|0|0|0|0|0|0|0|0|0|0|0|0|0|0|0|0|0|0|1|0|0|0|5|2|1|2|1|0|0|0|1|0	0.03	0.06	0.03	0.06	0.03	-7.25	1.15	0.59
MYNN	Q2TAY7	SMU1	3|1	4	2	2	0|0|0|0|0|0|0|0|0|0|0|0|0|0|0|0|0|0|0|0|0|0|0|0|0|1|0|0|0|5|2|1|2|1|0|0|0|1|0	0.03	0.06	0.03	0.06	0.03	-5.58	1.54	0.59
ZNF322	Q2TAY7	SMU1	1|2	3	1.5	2	0|0|0|0|0|0|0|0|0|0|0|0|0|0|0|0|0|0|0|0|0|0|0|0|0|1|0|0|0|5|2|1|2|1|0|0|0|1|0	0.01	0.02	0.01	0.02	0.01	-5.58	1.15	0.64
ZNF214	Q92522	H1FX	1|0	1	0.5	2	0|0|0|0|0|0|0|0|0|0|0|0|0|0|0|0|0|0|0|1|0|0|0|0|1|0|0|0|0|1|0|0|5|0|0|0|0|1|1	0	0	0	0	0	-5.74	0.5	0.88
ZNF331	Q92522	H1FX	0|2	2	1	2	0|0|0|0|0|0|0|0|0|0|0|0|0|0|0|0|0|0|0|1|0|0|0|0|1|0|0|0|0|1|0|0|5|0|0|0|0|1|1	0.03	0.06	0.03	0.06	0.03	-5.74	1	0.59
ZNF250	Q92522	H1FX	2|2	4	2	2	0|0|0|0|0|0|0|0|0|0|0|0|0|0|0|0|0|0|0|1|0|0|0|0|1|0|0|0|0|1|0|0|5|0|0|0|0|1|1	0.06	0.06	0.06	0.06	0.06	-2.84	2	0.55
ZNF596	Q92522	H1FX	2|2	4	2	2	0|0|0|0|0|0|0|0|0|0|0|0|0|0|0|0|0|0|0|1|0|0|0|0|1|0|0|0|0|1|0|0|5|0|0|0|0|1|1	0.06	0.06	0.06	0.06	0.06	-2.84	2	0.55
ZNF594	Q92522	H1FX	2|6	8	4	2	0|0|0|0|0|0|0|0|0|0|0|0|0|0|0|0|0|0|0|1|0|0|0|0|1|0|0|0|0|1|0|0|5|0|0|0|0|1|1	0.31	0.57	0.31	0.57	0.31	-2.84	4	0.36
ZNF595	Q92522	H1FX	3|3	6	3	2	0|0|0|0|0|0|0|0|0|0|0|0|0|0|0|0|0|0|0|1|0|0|0|0|1|0|0|0|0|1|0|0|5|0|0|0|0|1|1	0.15	0.15	0.15	0.15	0.15	-1.75	3	0.46
ZNF16	Q92522	H1FX	3|3	6	3	2	0|0|0|0|0|0|0|0|0|0|0|0|0|0|0|0|0|0|0|1|0|0|0|0|1|0|0|0|0|1|0|0|5|0|0|0|0|1|1	0.15	0.15	0.15	0.15	0.15	-1.75	3	0.46
ZNF71	Q92522	H1FX	4|4	8	4	2	0|0|0|0|0|0|0|0|0|0|0|0|0|0|0|0|0|0|0|1|0|0|0|0|1|0|0|0|0|1|0|0|5|0|0|0|0|1|1	0.28	0.28	0.28	0.28	0.28	-0.94	4	0.38
ZNF816	Q92522	H1FX	1|2	3	1.5	2	0|0|0|0|0|0|0|0|0|0|0|0|0|0|0|0|0|0|0|1|0|0|0|0|1|0|0|0|0|1|0|0|5|0|0|0|0|1|1	0.03	0.06	0.03	0.06	0.03	-4.33	1.5	0.59
IKZF3	Q92522	H1FX	0|2	2	1	2	0|0|0|0|0|0|0|0|0|0|0|0|0|0|0|0|0|0|0|1|0|0|0|0|1|0|0|0|0|1|0|0|5|0|0|0|0|1|1	0.03	0.06	0.03	0.06	0.03	-5.74	1	0.59
ZNF140	Q92522	H1FX	1|2	3	1.5	2	0|0|0|0|0|0|0|0|0|0|0|0|0|0|0|0|0|0|0|1|0|0|0|0|1|0|0|0|0|1|0|0|5|0|0|0|0|1|1	0.03	0.06	0.03	0.06	0.03	-4.33	1.5	0.59
ZNF708	Q92522	H1FX	1|0	1	0.5	2	0|0|0|0|0|0|0|0|0|0|0|0|0|0|0|0|0|0|0|1|0|0|0|0|1|0|0|0|0|1|0|0|5|0|0|0|0|1|1	0	0	0	0	0	-5.74	0.5	0.88
FEZF1	Q92522	H1FX	3|2	5	2.5	2	0|0|0|0|0|0|0|0|0|0|0|0|0|0|0|0|0|0|0|1|0|0|0|0|1|0|0|0|0|1|0|0|5|0|0|0|0|1|1	0.1	0.15	0.1	0.15	0.1	-2.84	2.5	0.5
ZBTB14	Q92522	H1FX	5|4	9	4.5	2	0|0|0|0|0|0|0|0|0|0|0|0|0|0|0|0|0|0|0|1|0|0|0|0|1|0|0|0|0|1|0|0|5|0|0|0|0|1|1	0.35	0.42	0.35	0.42	0.35	-0.94	4.5	0.35
ZNF18	Q92522	H1FX	0|1	1	0.5	2	0|0|0|0|0|0|0|0|0|0|0|0|0|0|0|0|0|0|0|1|0|0|0|0|1|0|0|0|0|1|0|0|5|0|0|0|0|1|1	0	0	0	0	0	-5.74	0.5	0.88
ZNF547	Q92522	H1FX	2|1	3	1.5	2	0|0|0|0|0|0|0|0|0|0|0|0|0|0|0|0|0|0|0|1|0|0|0|0|1|0|0|0|0|1|0|0|5|0|0|0|0|1|1	0.03	0.06	0.03	0.06	0.03	-4.33	1.5	0.59
ZNF8	Q92522	H1FX	2|0	2	1	2	0|0|0|0|0|0|0|0|0|0|0|0|0|0|0|0|0|0|0|1|0|0|0|0|1|0|0|0|0|1|0|0|5|0|0|0|0|1|1	0.03	0.06	0.03	0.06	0.03	-5.74	1	0.59
ZNF436	Q92522	H1FX	2|6	8	4	2	0|0|0|0|0|0|0|0|0|0|0|0|0|0|0|0|0|0|0|1|0|0|0|0|1|0|0|0|0|1|0|0|5|0|0|0|0|1|1	0.31	0.57	0.31	0.57	0.31	-2.84	4	0.36
ZNF768	Q92522	H1FX	3|3	6	3	2	0|0|0|0|0|0|0|0|0|0|0|0|0|0|0|0|0|0|0|1|0|0|0|0|1|0|0|0|0|1|0|0|5|0|0|0|0|1|1	0.15	0.15	0.15	0.15	0.15	-1.75	3	0.46
KLF1	Q92522	H1FX	4|2	6	3	2	0|0|0|0|0|0|0|0|0|0|0|0|0|0|0|0|0|0|0|1|0|0|0|0|1|0|0|0|0|1|0|0|5|0|0|0|0|1|1	0.17	0.28	0.17	0.28	0.17	-2.84	3	0.45
ZNF418	Q92522	H1FX	2|2	4	2	2	0|0|0|0|0|0|0|0|0|0|0|0|0|0|0|0|0|0|0|1|0|0|0|0|1|0|0|0|0|1|0|0|5|0|0|0|0|1|1	0.06	0.06	0.06	0.06	0.06	-2.84	2	0.55
ZNF513	Q92522	H1FX	0|3	3	1.5	2	0|0|0|0|0|0|0|0|0|0|0|0|0|0|0|0|0|0|0|1|0|0|0|0|1|0|0|0|0|1|0|0|5|0|0|0|0|1|1	0.07	0.15	0.07	0.15	0.07	-5.74	1.5	0.53
ZNF667	Q92522	H1FX	3|2	5	2.5	2	0|0|0|0|0|0|0|0|0|0|0|0|0|0|0|0|0|0|0|1|0|0|0|0|1|0|0|0|0|1|0|0|5|0|0|0|0|1|1	0.1	0.15	0.1	0.15	0.1	-2.84	2.5	0.5
ZNF184	Q92522	H1FX	1|1	2	1	2	0|0|0|0|0|0|0|0|0|0|0|0|0|0|0|0|0|0|0|1|0|0|0|0|1|0|0|0|0|1|0|0|5|0|0|0|0|1|1	0	0	0	0	0	-4.33	1	0.88
ZFP28	Q92522	H1FX	1|1	2	1	2	0|0|0|0|0|0|0|0|0|0|0|0|0|0|0|0|0|0|0|1|0|0|0|0|1|0|0|0|0|1|0|0|5|0|0|0|0|1|1	0	0	0	0	0	-4.33	1	0.88
ZNF320	Q92522	H1FX	1|5	6	3	2	0|0|0|0|0|0|0|0|0|0|0|0|0|0|0|0|0|0|0|1|0|0|0|0|1|0|0|0|0|1|0|0|5|0|0|0|0|1|1	0.21	0.42	0.21	0.42	0.21	-4.33	3	0.42
ZNF322	Q92522	H1FX	9|5	14	7	2	0|0|0|0|0|0|0|0|0|0|0|0|0|0|0|0|0|0|0|1|0|0|0|0|1|0|0|0|0|1|0|0|5|0|0|0|0|1|1	0.65	0.88	0.65	0.88	0.65	-0.34	7	0.08
ZNF329	Q92522	H1FX	1|10	11	5.5	2	0|0|0|0|0|0|0|0|0|0|0|0|0|0|0|0|0|0|0|1|0|0|0|0|1|0|0|0|0|1|0|0|5|0|0|0|0|1|1	0.47	0.93	0.47	0.93	0.47	-4.33	5.5	0.22
ZNF189	Q92522	H1FX	3|4	7	3.5	2	0|0|0|0|0|0|0|0|0|0|0|0|0|0|0|0|0|0|0|1|0|0|0|0|1|0|0|0|0|1|0|0|5|0|0|0|0|1|1	0.21	0.28	0.21	0.28	0.21	-1.75	3.5	0.42
ZNF582	Q92522	H1FX	0|2	2	1	2	0|0|0|0|0|0|0|0|0|0|0|0|0|0|0|0|0|0|0|1|0|0|0|0|1|0|0|0|0|1|0|0|5|0|0|0|0|1|1	0.03	0.06	0.03	0.06	0.03	-5.74	1	0.59
MYNN	Q92522	H1FX	3|2	5	2.5	2	0|0|0|0|0|0|0|0|0|0|0|0|0|0|0|0|0|0|0|1|0|0|0|0|1|0|0|0|0|1|0|0|5|0|0|0|0|1|1	0.1	0.15	0.1	0.15	0.1	-2.84	2.5	0.5
ZFP82	Q92522	H1FX	0|3	3	1.5	2	0|0|0|0|0|0|0|0|0|0|0|0|0|0|0|0|0|0|0|1|0|0|0|0|1|0|0|0|0|1|0|0|5|0|0|0|0|1|1	0.07	0.15	0.07	0.15	0.07	-5.74	1.5	0.53
PATZ1	Q92522	H1FX	2|3	5	2.5	2	0|0|0|0|0|0|0|0|0|0|0|0|0|0|0|0|0|0|0|1|0|0|0|0|1|0|0|0|0|1|0|0|5|0|0|0|0|1|1	0.1	0.15	0.1	0.15	0.1	-2.84	2.5	0.5
ZNF610	Q92522	H1FX	0|2	2	1	2	0|0|0|0|0|0|0|0|0|0|0|0|0|0|0|0|0|0|0|1|0|0|0|0|1|0|0|0|0|1|0|0|5|0|0|0|0|1|1	0.03	0.06	0.03	0.06	0.03	-5.74	1	0.59
ZNF394	Q92522	H1FX	0|1	1	0.5	2	0|0|0|0|0|0|0|0|0|0|0|0|0|0|0|0|0|0|0|1|0|0|0|0|1|0|0|0|0|1|0|0|5|0|0|0|0|1|1	0	0	0	0	0	-5.74	0.5	0.88
MAZ	Q92522	H1FX	5|4	9	4.5	2	0|0|0|0|0|0|0|0|0|0|0|0|0|0|0|0|0|0|0|1|0|0|0|0|1|0|0|0|0|1|0|0|5|0|0|0|0|1|1	0.35	0.42	0.35	0.42	0.35	-0.94	4.5	0.35
ZNF449	Q92522	H1FX	4|3	7	3.5	2	0|0|0|0|0|0|0|0|0|0|0|0|0|0|0|0|0|0|0|1|0|0|0|0|1|0|0|0|0|1|0|0|5|0|0|0|0|1|1	0.21	0.28	0.21	0.28	0.21	-1.75	3.5	0.42
ZBTB42	Q92522	H1FX	5|3	8	4	2	0|0|0|0|0|0|0|0|0|0|0|0|0|0|0|0|0|0|0|1|0|0|0|0|1|0|0|0|0|1|0|0|5|0|0|0|0|1|1	0.28	0.42	0.28	0.42	0.28	-1.75	4	0.37
PRDM1	Q92522	H1FX	4|10	14	7	2	0|0|0|0|0|0|0|0|0|0|0|0|0|0|0|0|0|0|0|1|0|0|0|0|1|0|0|0|0|1|0|0|5|0|0|0|0|1|1	0.61	0.93	0.61	0.93	0.61	-0.94	7	0.1
ZNF778	Q92522	H1FX	3|4	7	3.5	2	0|0|0|0|0|0|0|0|0|0|0|0|0|0|0|0|0|0|0|1|0|0|0|0|1|0|0|0|0|1|0|0|5|0|0|0|0|1|1	0.21	0.28	0.21	0.28	0.21	-1.75	3.5	0.42
ZNF419	Q92522	H1FX	1|1	2	1	2	0|0|0|0|0|0|0|0|0|0|0|0|0|0|0|0|0|0|0|1|0|0|0|0|1|0|0|0|0|1|0|0|5|0|0|0|0|1|1	0	0	0	0	0	-4.33	1	0.88
ZNF549	Q92522	H1FX	2|1	3	1.5	2	0|0|0|0|0|0|0|0|0|0|0|0|0|0|0|0|0|0|0|1|0|0|0|0|1|0|0|0|0|1|0|0|5|0|0|0|0|1|1	0.03	0.06	0.03	0.06	0.03	-4.33	1.5	0.59
ZNF770	Q92522	H1FX	5|5	10	5	2	0|0|0|0|0|0|0|0|0|0|0|0|0|0|0|0|0|0|0|1|0|0|0|0|1|0|0|0|0|1|0|0|5|0|0|0|0|1|1	0.42	0.42	0.42	0.42	0.42	-0.34	5	0.28
ZSCAN30	Q92522	H1FX	4|2	6	3	2	0|0|0|0|0|0|0|0|0|0|0|0|0|0|0|0|0|0|0|1|0|0|0|0|1|0|0|0|0|1|0|0|5|0|0|0|0|1|1	0.17	0.28	0.17	0.28	0.17	-2.84	3	0.45
ZNF324	O43790	KRT86	5|0	5	2.5	2	0|0|0|0|0|0|0|0|0|0|0|0|0|0|0|0|0|0|0|0|0|0|0|0|0|0|0|0|0|15|9|1|0|1|0|1|1|0|0	0.01	0.01	0.01	0.01	0.01	-13.02	0.89	0.66
ZSCAN30	O43790	KRT86	5|0	5	2.5	2	0|0|0|0|0|0|0|0|0|0|0|0|0|0|0|0|0|0|0|0|0|0|0|0|0|0|0|0|0|15|9|1|0|1|0|1|1|0|0	0.01	0.01	0.01	0.01	0.01	-13.02	0.89	0.66
ZNF768	Q8N3C0	ASCC3	2|2	4	2	2	0|0|0|0|0|0|0|0|0|0|0|0|0|0|0|0|0|0|0|0|0|0|0|0|0|0|0|0|0|0|0|0|1|0|0|0|0|1|1	0.36	0.36	0.36	0.36	0.36	-0.56	6.67	0.35
ZNF547	Q9NRF8	CTPS2	1|0	1	0.5	2	0|0|0|0|0|0|0|0|0|0|0|0|0|0|0|0|0|0|0|0|0|0|0|0|0|0|0|0|0|0|0|0|0|0|1|0|0|0|0	0	0	0	0	0	-2.99	5	0.88
ZNF708	Q9NRF8	CTPS2	1|0	1	0.5	2	0|0|0|0|0|0|0|0|0|0|0|0|0|0|0|0|0|0|0|0|0|0|0|0|0|0|0|0|0|0|0|0|0|0|1|0|0|0|0	0	0	0	0	0	-2.99	5	0.88
OSR2	Q9NRF8	CTPS2	0|1	1	0.5	2	0|0|0|0|0|0|0|0|0|0|0|0|0|0|0|0|0|0|0|0|0|0|0|0|0|0|0|0|0|0|0|0|0|0|1|0|0|0|0	0	0	0	0	0	-2.99	5	0.88
ZSCAN30	Q9NRF8	CTPS2	1|0	1	0.5	2	0|0|0|0|0|0|0|0|0|0|0|0|0|0|0|0|0|0|0|0|0|0|0|0|0|0|0|0|0|0|0|0|0|0|1|0|0|0|0	0	0	0	0	0	-2.99	5	0.88
ZNF140	O43795	MYO1B	2|0	2	1	2	0|0|0|0|0|0|0|0|0|0|0|0|0|0|0|0|0|0|0|0|0|0|0|0|0|0|0|0|0|4|11|0|0|0|0|1|0|0|0	0.01	0.01	0.01	0.01	0.01	-8.06	0.62	0.65
ZNF708	O43795	MYO1B	0|3	3	1.5	2	0|0|0|0|0|0|0|0|0|0|0|0|0|0|0|0|0|0|0|0|0|0|0|0|0|0|0|0|0|4|11|0|0|0|0|1|0|0|0	0.03	0.05	0.03	0.05	0.03	-8.06	0.94	0.6
ZNF320	O43795	MYO1B	1|2	3	1.5	2	0|0|0|0|0|0|0|0|0|0|0|0|0|0|0|0|0|0|0|0|0|0|0|0|0|0|0|0|0|4|11|0|0|0|0|1|0|0|0	0.01	0.01	0.01	0.01	0.01	-6.19	0.94	0.65
KLF7	O43795	MYO1B	0|2	2	1	2	0|0|0|0|0|0|0|0|0|0|0|0|0|0|0|0|0|0|0|0|0|0|0|0|0|0|0|0|0|4|11|0|0|0|0|1|0|0|0	0.01	0.01	0.01	0.01	0.01	-8.06	0.62	0.65
ZNF34	O43795	MYO1B	0|1	1	0.5	2	0|0|0|0|0|0|0|0|0|0|0|0|0|0|0|0|0|0|0|0|0|0|0|0|0|0|0|0|0|4|11|0|0|0|0|1|0|0|0	0	0	0	0	0	-8.06	0.31	0.88
ZNF436	O43795	MYO1B	0|2	2	1	2	0|0|0|0|0|0|0|0|0|0|0|0|0|0|0|0|0|0|0|0|0|0|0|0|0|0|0|0|0|4|11|0|0|0|0|1|0|0|0	0.01	0.01	0.01	0.01	0.01	-8.06	0.62	0.65
ZNF768	O43795	MYO1B	2|2	4	2	2	0|0|0|0|0|0|0|0|0|0|0|0|0|0|0|0|0|0|0|0|0|0|0|0|0|0|0|0|0|4|11|0|0|0|0|1|0|0|0	0.01	0.01	0.01	0.01	0.01	-4.26	1.25	0.63
ZFP82	O43795	MYO1B	1|1	2	1	2	0|0|0|0|0|0|0|0|0|0|0|0|0|0|0|0|0|0|0|0|0|0|0|0|0|0|0|0|0|4|11|0|0|0|0|1|0|0|0	0	0	0	0	0	-6.19	0.62	0.88
ZNF71	O43795	MYO1B	4|4	8	4	2	0|0|0|0|0|0|0|0|0|0|0|0|0|0|0|0|0|0|0|0|0|0|0|0|0|0|0|0|0|4|11|0|0|0|0|1|0|0|0	0.13	0.13	0.13	0.13	0.13	-1.91	2.5	0.48
FEZF1	O43795	MYO1B	1|1	2	1	2	0|0|0|0|0|0|0|0|0|0|0|0|0|0|0|0|0|0|0|0|0|0|0|0|0|0|0|0|0|4|11|0|0|0|0|1|0|0|0	0	0	0	0	0	-6.19	0.62	0.88
ZNF513	Q9UPN4	AZI1	2|1	3	1.5	2	0|0|0|0|0|0|0|0|0|0|0|0|0|0|0|0|0|0|0|0|0|0|0|0|0|0|0|0|0|0|0|0|0|0|0|0|0|0|0	0.41	0.82	0.41	0.82	0.41	-0.49	15	0.28
ZNF610	Q9UPN4	AZI1	1|1	2	1	2	0|0|0|0|0|0|0|0|0|0|0|0|0|0|0|0|0|0|0|0|0|0|0|0|0|0|0|0|0|0|0|0|0|0|0|0|0|0|0	0	0	0	0	0	-0.49	10	0.88
ZNF610	Q9UPN7	PPP6R1	1|1	2	1	2	0|0|0|0|0|0|0|0|0|0|0|0|0|0|0|0|0|0|0|0|0|0|0|0|0|0|0|0|0|0|0|0|0|0|0|0|0|0|0	0	0	0	0	0	-0.49	10	0.88
ZNF329	Q9UPN7	PPP6R1	1|0	1	0.5	2	0|0|0|0|0|0|0|0|0|0|0|0|0|0|0|0|0|0|0|0|0|0|0|0|0|0|0|0|0|0|0|0|0|0|0|0|0|0|0	0	0	0	0	0	-3	5	0.88
GTF3A	Q9UPN7	PPP6R1	3|1	4	2	2	0|0|0|0|0|0|0|0|0|0|0|0|0|0|0|0|0|0|0|0|0|0|0|0|0|0|0|0|0|0|0|0|0|0|0|0|0|0|0	0.48	0.97	0.48	0.97	0.48	-0.49	20	0.19
ZNF595	Q9UPN7	PPP6R1	1|1	2	1	2	0|0|0|0|0|0|0|0|0|0|0|0|0|0|0|0|0|0|0|0|0|0|0|0|0|0|0|0|0|0|0|0|0|0|0|0|0|0|0	0	0	0	0	0	-0.49	10	0.88
ZNF513	Q9UPN7	PPP6R1	2|1	3	1.5	2	0|0|0|0|0|0|0|0|0|0|0|0|0|0|0|0|0|0|0|0|0|0|0|0|0|0|0|0|0|0|0|0|0|0|0|0|0|0|0	0.41	0.82	0.41	0.82	0.41	-0.49	15	0.28
ZNF667	Q9UPN7	PPP6R1	1|0	1	0.5	2	0|0|0|0|0|0|0|0|0|0|0|0|0|0|0|0|0|0|0|0|0|0|0|0|0|0|0|0|0|0|0|0|0|0|0|0|0|0|0	0	0	0	0	0	-3	5	0.88
ZNF610	Q9UPN9	TRIM33	1|2	3	1.5	2	0|0|0|0|0|0|0|0|0|0|0|0|0|0|0|0|0|0|0|0|0|0|0|0|0|0|0|0|0|0|0|0|0|0|0|0|0|0|0	0.41	0.82	0.41	0.82	0.41	-0.49	15	0.28
ZFP28	Q9UPN9	TRIM33	1|1	2	1	2	0|0|0|0|0|0|0|0|0|0|0|0|0|0|0|0|0|0|0|0|0|0|0|0|0|0|0|0|0|0|0|0|0|0|0|0|0|0|0	0	0	0	0	0	-0.49	10	0.88
ZNF214	Q9UPN9	TRIM33	1|0	1	0.5	2	0|0|0|0|0|0|0|0|0|0|0|0|0|0|0|0|0|0|0|0|0|0|0|0|0|0|0|0|0|0|0|0|0|0|0|0|0|0|0	0	0	0	0	0	-3	5	0.88
ZNF418	Q9UPN9	TRIM33	1|1	2	1	2	0|0|0|0|0|0|0|0|0|0|0|0|0|0|0|0|0|0|0|0|0|0|0|0|0|0|0|0|0|0|0|0|0|0|0|0|0|0|0	0	0	0	0	0	-0.49	10	0.88
ZNF189	Q9UPN9	TRIM33	0|1	1	0.5	2	0|0|0|0|0|0|0|0|0|0|0|0|0|0|0|0|0|0|0|0|0|0|0|0|0|0|0|0|0|0|0|0|0|0|0|0|0|0|0	0	0	0	0	0	-3	5	0.88
ZNF669	Q9UPN9	TRIM33	1|3	4	2	2	0|0|0|0|0|0|0|0|0|0|0|0|0|0|0|0|0|0|0|0|0|0|0|0|0|0|0|0|0|0|0|0|0|0|0|0|0|0|0	0.48	0.97	0.48	0.97	0.48	-0.49	20	0.19
ZNF778	Q9UPN9	TRIM33	1|0	1	0.5	2	0|0|0|0|0|0|0|0|0|0|0|0|0|0|0|0|0|0|0|0|0|0|0|0|0|0|0|0|0|0|0|0|0|0|0|0|0|0|0	0	0	0	0	0	-3	5	0.88
ZFP82	Q9UPN9	TRIM33	0|1	1	0.5	2	0|0|0|0|0|0|0|0|0|0|0|0|0|0|0|0|0|0|0|0|0|0|0|0|0|0|0|0|0|0|0|0|0|0|0|0|0|0|0	0	0	0	0	0	-3	5	0.88
ZNF513	Q9UPN9	TRIM33	0|1	1	0.5	2	0|0|0|0|0|0|0|0|0|0|0|0|0|0|0|0|0|0|0|0|0|0|0|0|0|0|0|0|0|0|0|0|0|0|0|0|0|0|0	0	0	0	0	0	-3	5	0.88
ZNF549	Q9UPN9	TRIM33	1|0	1	0.5	2	0|0|0|0|0|0|0|0|0|0|0|0|0|0|0|0|0|0|0|0|0|0|0|0|0|0|0|0|0|0|0|0|0|0|0|0|0|0|0	0	0	0	0	0	-3	5	0.88
ZNF816	Q9UPN9	TRIM33	0|1	1	0.5	2	0|0|0|0|0|0|0|0|0|0|0|0|0|0|0|0|0|0|0|0|0|0|0|0|0|0|0|0|0|0|0|0|0|0|0|0|0|0|0	0	0	0	0	0	-3	5	0.88
ZNF770	Q9UPN9	TRIM33	0|1	1	0.5	2	0|0|0|0|0|0|0|0|0|0|0|0|0|0|0|0|0|0|0|0|0|0|0|0|0|0|0|0|0|0|0|0|0|0|0|0|0|0|0	0	0	0	0	0	-3	5	0.88
KLF1	Q8N684	CPSF7	1|0	1	0.5	2	0|0|0|0|0|0|0|0|0|0|0|0|0|0|0|0|0|0|0|0|0|0|0|0|0|0|0|0|0|1|2|0|0|0|0|0|0|1|1	0	0	0	0	0	-4.44	1	0.88
ZNF322	Q8N684	CPSF7	1|1	2	1	2	0|0|0|0|0|0|0|0|0|0|0|0|0|0|0|0|0|0|0|0|0|0|0|0|0|0|0|0|0|1|2|0|0|0|0|0|0|1|1	0	0	0	0	0	-2.83	2	0.88
ZFP82	Q8N684	CPSF7	1|0	1	0.5	2	0|0|0|0|0|0|0|0|0|0|0|0|0|0|0|0|0|0|0|0|0|0|0|0|0|0|0|0|0|1|2|0|0|0|0|0|0|1|1	0	0	0	0	0	-4.44	1	0.88
ZNF436	Q8N684	CPSF7	0|1	1	0.5	2	0|0|0|0|0|0|0|0|0|0|0|0|0|0|0|0|0|0|0|0|0|0|0|0|0|0|0|0|0|1|2|0|0|0|0|0|0|1|1	0	0	0	0	0	-4.44	1	0.88
ZNF594	Q8N684	CPSF7	1|0	1	0.5	2	0|0|0|0|0|0|0|0|0|0|0|0|0|0|0|0|0|0|0|0|0|0|0|0|0|0|0|0|0|1|2|0|0|0|0|0|0|1|1	0	0	0	0	0	-4.44	1	0.88
ZNF419	Q8N684	CPSF7	0|1	1	0.5	2	0|0|0|0|0|0|0|0|0|0|0|0|0|0|0|0|0|0|0|0|0|0|0|0|0|0|0|0|0|1|2|0|0|0|0|0|0|1|1	0	0	0	0	0	-4.44	1	0.88
MAZ	P35237	SERPINB6	0|2	2	1	2	0|0|0|0|0|0|0|0|0|0|0|0|0|0|0|0|0|0|0|0|0|0|0|0|0|0|0|0|0|0|0|0|2|0|0|0|0|0|0	0.24	0.49	0.24	0.49	0.24	-3.39	5	0.4
ZNF692	Q562R1	ACTBL2	1|1	2	1	2	0|1|0|0|1|1|0|2|0|0|0|0|0|0|1|0|1|0|0|0|2|1|0|1|1|3|3|0|0|13|19|14|26|14|20|5|8|2|0	0	0	0	0	0	-52.02	0.08	0.88
ZNF34	Q562R1	ACTBL2	0|2	2	1	2	0|1|0|0|1|1|0|2|0|0|0|0|0|0|1|0|1|0|0|0|2|1|0|1|1|3|3|0|0|13|19|14|26|14|20|5|8|2|0	0	0	0	0	0	-55.95	0.08	0.88
ZFP28	Q562R1	ACTBL2	1|0	1	0.5	2	0|1|0|0|1|1|0|2|0|0|0|0|0|0|1|0|1|0|0|0|2|1|0|1|1|3|3|0|0|13|19|14|26|14|20|5|8|2|0	0	0	0	0	0	-55.95	0.04	0.88
ZNF596	Q562R1	ACTBL2	0|2	2	1	2	0|1|0|0|1|1|0|2|0|0|0|0|0|0|1|0|1|0|0|0|2|1|0|1|1|3|3|0|0|13|19|14|26|14|20|5|8|2|0	0	0	0	0	0	-55.95	0.08	0.88
ZNF594	Q562R1	ACTBL2	1|1	2	1	2	0|1|0|0|1|1|0|2|0|0|0|0|0|0|1|0|1|0|0|0|2|1|0|1|1|3|3|0|0|13|19|14|26|14|20|5|8|2|0	0	0	0	0	0	-52.02	0.08	0.88
ZNF71	Q562R1	ACTBL2	0|3	3	1.5	2	0|1|0|0|1|1|0|2|0|0|0|0|0|0|1|0|1|0|0|0|2|1|0|1|1|3|3|0|0|13|19|14|26|14|20|5|8|2|0	0	0	0	0	0	-55.95	0.12	0.88
ZSCAN5C	Q562R1	ACTBL2	2|2	4	2	2	0|1|0|0|1|1|0|2|0|0|0|0|0|0|1|0|1|0|0|0|2|1|0|1|1|3|3|0|0|13|19|14|26|14|20|5|8|2|0	0	0	0	0	0	-48.78	0.16	0.88
ZNF140	Q562R1	ACTBL2	1|0	1	0.5	2	0|1|0|0|1|1|0|2|0|0|0|0|0|0|1|0|1|0|0|0|2|1|0|1|1|3|3|0|0|13|19|14|26|14|20|5|8|2|0	0	0	0	0	0	-55.95	0.04	0.88
FEZF1	Q562R1	ACTBL2	0|1	1	0.5	2	0|1|0|0|1|1|0|2|0|0|0|0|0|0|1|0|1|0|0|0|2|1|0|1|1|3|3|0|0|13|19|14|26|14|20|5|8|2|0	0	0	0	0	0	-55.95	0.04	0.88
MZF1	Q562R1	ACTBL2	1|2	3	1.5	2	0|1|0|0|1|1|0|2|0|0|0|0|0|0|1|0|1|0|0|0|2|1|0|1|1|3|3|0|0|13|19|14|26|14|20|5|8|2|0	0	0	0	0	0	-52.02	0.12	0.88
ZBTB14	Q562R1	ACTBL2	0|2	2	1	2	0|1|0|0|1|1|0|2|0|0|0|0|0|0|1|0|1|0|0|0|2|1|0|1|1|3|3|0|0|13|19|14|26|14|20|5|8|2|0	0	0	0	0	0	-55.95	0.08	0.88
ZBTB42	Q562R1	ACTBL2	0|1	1	0.5	2	0|1|0|0|1|1|0|2|0|0|0|0|0|0|1|0|1|0|0|0|2|1|0|1|1|3|3|0|0|13|19|14|26|14|20|5|8|2|0	0	0	0	0	0	-55.95	0.04	0.88
KLF7	Q562R1	ACTBL2	3|1	4	2	2	0|1|0|0|1|1|0|2|0|0|0|0|0|0|1|0|1|0|0|0|2|1|0|1|1|3|3|0|0|13|19|14|26|14|20|5|8|2|0	0	0	0	0	0	-52.02	0.16	0.88
IKZF3	Q562R1	ACTBL2	0|2	2	1	2	0|1|0|0|1|1|0|2|0|0|0|0|0|0|1|0|1|0|0|0|2|1|0|1|1|3|3|0|0|13|19|14|26|14|20|5|8|2|0	0	0	0	0	0	-55.95	0.08	0.88
KLF1	Q562R1	ACTBL2	1|1	2	1	2	0|1|0|0|1|1|0|2|0|0|0|0|0|0|1|0|1|0|0|0|2|1|0|1|1|3|3|0|0|13|19|14|26|14|20|5|8|2|0	0	0	0	0	0	-52.02	0.08	0.88
ZIM3	Q562R1	ACTBL2	1|2	3	1.5	2	0|1|0|0|1|1|0|2|0|0|0|0|0|0|1|0|1|0|0|0|2|1|0|1|1|3|3|0|0|13|19|14|26|14|20|5|8|2|0	0	0	0	0	0	-52.02	0.12	0.88
GLIS1	Q562R1	ACTBL2	1|0	1	0.5	2	0|1|0|0|1|1|0|2|0|0|0|0|0|0|1|0|1|0|0|0|2|1|0|1|1|3|3|0|0|13|19|14|26|14|20|5|8|2|0	0	0	0	0	0	-55.95	0.04	0.88
ZNF189	Q562R1	ACTBL2	1|0	1	0.5	2	0|1|0|0|1|1|0|2|0|0|0|0|0|0|1|0|1|0|0|0|2|1|0|1|1|3|3|0|0|13|19|14|26|14|20|5|8|2|0	0	0	0	0	0	-55.95	0.04	0.88
ZNF329	Q562R1	ACTBL2	1|0	1	0.5	2	0|1|0|0|1|1|0|2|0|0|0|0|0|0|1|0|1|0|0|0|2|1|0|1|1|3|3|0|0|13|19|14|26|14|20|5|8|2|0	0	0	0	0	0	-55.95	0.04	0.88
OSR2	Q562R1	ACTBL2	1|1	2	1	2	0|1|0|0|1|1|0|2|0|0|0|0|0|0|1|0|1|0|0|0|2|1|0|1|1|3|3|0|0|13|19|14|26|14|20|5|8|2|0	0	0	0	0	0	-52.02	0.08	0.88
ZFP82	Q562R1	ACTBL2	1|1	2	1	2	0|1|0|0|1|1|0|2|0|0|0|0|0|0|1|0|1|0|0|0|2|1|0|1|1|3|3|0|0|13|19|14|26|14|20|5|8|2|0	0	0	0	0	0	-52.02	0.08	0.88
GTF3A	Q562R1	ACTBL2	3|3	6	3	2	0|1|0|0|1|1|0|2|0|0|0|0|0|0|1|0|1|0|0|0|2|1|0|1|1|3|3|0|0|13|19|14|26|14|20|5|8|2|0	0	0	0	0	0	-45.94	0.24	0.88
ZNF547	Q562R1	ACTBL2	0|2	2	1	2	0|1|0|0|1|1|0|2|0|0|0|0|0|0|1|0|1|0|0|0|2|1|0|1|1|3|3|0|0|13|19|14|26|14|20|5|8|2|0	0	0	0	0	0	-55.95	0.08	0.88
PRDM1	Q562R1	ACTBL2	2|1	3	1.5	2	0|1|0|0|1|1|0|2|0|0|0|0|0|0|1|0|1|0|0|0|2|1|0|1|1|3|3|0|0|13|19|14|26|14|20|5|8|2|0	0	0	0	0	0	-52.02	0.12	0.88
ZNF778	Q562R1	ACTBL2	0|1	1	0.5	2	0|1|0|0|1|1|0|2|0|0|0|0|0|0|1|0|1|0|0|0|2|1|0|1|1|3|3|0|0|13|19|14|26|14|20|5|8|2|0	0	0	0	0	0	-55.95	0.04	0.88
SCRT1	Q562R1	ACTBL2	1|2	3	1.5	2	0|1|0|0|1|1|0|2|0|0|0|0|0|0|1|0|1|0|0|0|2|1|0|1|1|3|3|0|0|13|19|14|26|14|20|5|8|2|0	0	0	0	0	0	-52.02	0.12	0.88
ZNF37A	Q562R1	ACTBL2	0|1	1	0.5	2	0|1|0|0|1|1|0|2|0|0|0|0|0|0|1|0|1|0|0|0|2|1|0|1|1|3|3|0|0|13|19|14|26|14|20|5|8|2|0	0	0	0	0	0	-55.95	0.04	0.88
ZNF610	Q9Y3Y2	CHTOP	2|2	4	2	2	0|0|0|0|0|0|0|0|0|0|0|0|0|0|0|0|0|0|0|0|0|0|0|0|1|0|0|1|0|1|6|0|2|0|0|0|1|0|0	0.03	0.03	0.03	0.03	0.03	-3.4	1.67	0.59
FEZF1	Q9Y3Y2	CHTOP	3|1	4	2	2	0|0|0|0|0|0|0|0|0|0|0|0|0|0|0|0|0|0|0|0|0|0|0|0|1|0|0|1|0|1|6|0|2|0|0|0|1|0|0	0.05	0.1	0.05	0.1	0.05	-5.01	1.67	0.56
ZNF322	Q9Y3Y2	CHTOP	1|0	1	0.5	2	0|0|0|0|0|0|0|0|0|0|0|0|0|0|0|0|0|0|0|0|0|0|0|0|1|0|0|1|0|1|6|0|2|0|0|0|1|0|0	0	0	0	0	0	-6.59	0.42	0.88
ZNF250	Q9Y3Y2	CHTOP	0|3	3	1.5	2	0|0|0|0|0|0|0|0|0|0|0|0|0|0|0|0|0|0|0|0|0|0|0|0|1|0|0|1|0|1|6|0|2|0|0|0|1|0|0	0.05	0.1	0.05	0.1	0.05	-6.59	1.25	0.56
MAZ	Q9Y3Y2	CHTOP	2|0	2	1	2	0|0|0|0|0|0|0|0|0|0|0|0|0|0|0|0|0|0|0|0|0|0|0|0|1|0|0|1|0|1|6|0|2|0|0|0|1|0|0	0.02	0.03	0.02	0.03	0.02	-6.59	0.83	0.62
ZNF189	Q9Y3Y2	CHTOP	2|3	5	2.5	2	0|0|0|0|0|0|0|0|0|0|0|0|0|0|0|0|0|0|0|0|0|0|0|0|1|0|0|1|0|1|6|0|2|0|0|0|1|0|0	0.06	0.1	0.06	0.1	0.06	-3.4	2.08	0.54
ZNF184	Q9Y3Y2	CHTOP	1|0	1	0.5	2	0|0|0|0|0|0|0|0|0|0|0|0|0|0|0|0|0|0|0|0|0|0|0|0|1|0|0|1|0|1|6|0|2|0|0|0|1|0|0	0	0	0	0	0	-6.59	0.42	0.88
KLF7	Q9Y3Y2	CHTOP	0|2	2	1	2	0|0|0|0|0|0|0|0|0|0|0|0|0|0|0|0|0|0|0|0|0|0|0|0|1|0|0|1|0|1|6|0|2|0|0|0|1|0|0	0.02	0.03	0.02	0.03	0.02	-6.59	0.83	0.62
ZBTB42	Q9Y3Y2	CHTOP	1|1	2	1	2	0|0|0|0|0|0|0|0|0|0|0|0|0|0|0|0|0|0|0|0|0|0|0|0|1|0|0|1|0|1|6|0|2|0|0|0|1|0|0	0	0	0	0	0	-5.01	0.83	0.88
ZNF596	Q9Y3Y2	CHTOP	0|1	1	0.5	2	0|0|0|0|0|0|0|0|0|0|0|0|0|0|0|0|0|0|0|0|0|0|0|0|1|0|0|1|0|1|6|0|2|0|0|0|1|0|0	0	0	0	0	0	-6.59	0.42	0.88
ZNF768	Q9Y3Y2	CHTOP	0|1	1	0.5	2	0|0|0|0|0|0|0|0|0|0|0|0|0|0|0|0|0|0|0|0|0|0|0|0|1|0|0|1|0|1|6|0|2|0|0|0|1|0|0	0	0	0	0	0	-6.59	0.42	0.88
KLF1	Q9Y3Y2	CHTOP	1|2	3	1.5	2	0|0|0|0|0|0|0|0|0|0|0|0|0|0|0|0|0|0|0|0|0|0|0|0|1|0|0|1|0|1|6|0|2|0|0|0|1|0|0	0.02	0.03	0.02	0.03	0.02	-5.01	1.25	0.62
ZNF513	Q9Y3Y2	CHTOP	2|1	3	1.5	2	0|0|0|0|0|0|0|0|0|0|0|0|0|0|0|0|0|0|0|0|0|0|0|0|1|0|0|1|0|1|6|0|2|0|0|0|1|0|0	0.02	0.03	0.02	0.03	0.02	-5.01	1.25	0.62
ZNF16	Q9Y3Y2	CHTOP	0|1	1	0.5	2	0|0|0|0|0|0|0|0|0|0|0|0|0|0|0|0|0|0|0|0|0|0|0|0|1|0|0|1|0|1|6|0|2|0|0|0|1|0|0	0	0	0	0	0	-6.59	0.42	0.88
GTF3A	Q9Y3Y2	CHTOP	2|2	4	2	2	0|0|0|0|0|0|0|0|0|0|0|0|0|0|0|0|0|0|0|0|0|0|0|0|1|0|0|1|0|1|6|0|2|0|0|0|1|0|0	0.03	0.03	0.03	0.03	0.03	-3.4	1.67	0.59
ZNF549	Q9Y3Y2	CHTOP	1|0	1	0.5	2	0|0|0|0|0|0|0|0|0|0|0|0|0|0|0|0|0|0|0|0|0|0|0|0|1|0|0|1|0|1|6|0|2|0|0|0|1|0|0	0	0	0	0	0	-6.59	0.42	0.88
ZNF778	Q9Y3Y2	CHTOP	2|1	3	1.5	2	0|0|0|0|0|0|0|0|0|0|0|0|0|0|0|0|0|0|0|0|0|0|0|0|1|0|0|1|0|1|6|0|2|0|0|0|1|0|0	0.02	0.03	0.02	0.03	0.02	-5.01	1.25	0.62
ZNF770	Q9Y3Y2	CHTOP	2|0	2	1	2	0|0|0|0|0|0|0|0|0|0|0|0|0|0|0|0|0|0|0|0|0|0|0|0|1|0|0|1|0|1|6|0|2|0|0|0|1|0|0	0.02	0.03	0.02	0.03	0.02	-6.59	0.83	0.62
ZNF667	Q9Y3Y2	CHTOP	1|1	2	1	2	0|0|0|0|0|0|0|0|0|0|0|0|0|0|0|0|0|0|0|0|0|0|0|0|1|0|0|1|0|1|6|0|2|0|0|0|1|0|0	0	0	0	0	0	-5.01	0.83	0.88
ZNF214	Q14103	HNRNPD	2|2	4	2	2	6|15|4|2|2|0|0|2|7|6|6|2|2|4|3|4|6|1|2|2|13|5|11|3|1|13|8|8|1|9|9|1|4|1|1|0|0|7|5	0	0	0	0	0	-38.73	0.2	0.88
ZNF331	Q14103	HNRNPD	5|5	10	5	2	6|15|4|2|2|0|0|2|7|6|6|2|2|4|3|4|6|1|2|2|13|5|11|3|1|13|8|8|1|9|9|1|4|1|1|0|0|7|5	0	0	0	0	0	-31.66	0.5	0.86
ZNF250	Q14103	HNRNPD	5|17	22	11	2	6|15|4|2|2|0|0|2|7|6|6|2|2|4|3|4|6|1|2|2|13|5|11|3|1|13|8|8|1|9|9|1|4|1|1|0|0|7|5	0	0	0	0	0	-31.66	1.1	0.81
GLIS1	Q14103	HNRNPD	10|2	12	6	2	6|15|4|2|2|0|0|2|7|6|6|2|2|4|3|4|6|1|2|2|13|5|11|3|1|13|8|8|1|9|9|1|4|1|1|0|0|7|5	0	0	0	0	0	-38.73	0.6	0.85
ZNF595	Q14103	HNRNPD	2|2	4	2	2	6|15|4|2|2|0|0|2|7|6|6|2|2|4|3|4|6|1|2|2|13|5|11|3|1|13|8|8|1|9|9|1|4|1|1|0|0|7|5	0	0	0	0	0	-38.73	0.2	0.88
ZNF419	Q14103	HNRNPD	3|4	7	3.5	2	6|15|4|2|2|0|0|2|7|6|6|2|2|4|3|4|6|1|2|2|13|5|11|3|1|13|8|8|1|9|9|1|4|1|1|0|0|7|5	0	0	0	0	0	-36.11	0.35	0.88
ZNF34	Q14103	HNRNPD	1|4	5	2.5	2	6|15|4|2|2|0|0|2|7|6|6|2|2|4|3|4|6|1|2|2|13|5|11|3|1|13|8|8|1|9|9|1|4|1|1|0|0|7|5	0	0	0	0	0	-41.74	0.25	0.88
SCRT1	Q14103	HNRNPD	12|8	20	10	2	6|15|4|2|2|0|0|2|7|6|6|2|2|4|3|4|6|1|2|2|13|5|11|3|1|13|8|8|1|9|9|1|4|1|1|0|0|7|5	0	0	0	0	0	-26.28	1	0.84
ZNF667	Q14103	HNRNPD	2|1	3	1.5	2	6|15|4|2|2|0|0|2|7|6|6|2|2|4|3|4|6|1|2|2|13|5|11|3|1|13|8|8|1|9|9|1|4|1|1|0|0|7|5	0	0	0	0	0	-41.74	0.15	0.88
ZNF594	Q14103	HNRNPD	11|5	16	8	2	6|15|4|2|2|0|0|2|7|6|6|2|2|4|3|4|6|1|2|2|13|5|11|3|1|13|8|8|1|9|9|1|4|1|1|0|0|7|5	0	0	0	0	0	-31.66	0.8	0.85
ZNF490	Q14103	HNRNPD	6|6	12	6	2	6|15|4|2|2|0|0|2|7|6|6|2|2|4|3|4|6|1|2|2|13|5|11|3|1|13|8|8|1|9|9|1|4|1|1|0|0|7|5	0	0	0	0	0	-29.72	0.6	0.86
ZNF16	Q14103	HNRNPD	3|2	5	2.5	2	6|15|4|2|2|0|0|2|7|6|6|2|2|4|3|4|6|1|2|2|13|5|11|3|1|13|8|8|1|9|9|1|4|1|1|0|0|7|5	0	0	0	0	0	-38.73	0.25	0.88
ZNF71	Q14103	HNRNPD	3|8	11	5.5	2	6|15|4|2|2|0|0|2|7|6|6|2|2|4|3|4|6|1|2|2|13|5|11|3|1|13|8|8|1|9|9|1|4|1|1|0|0|7|5	0	0	0	0	0	-36.11	0.55	0.86
ZNF816	Q14103	HNRNPD	1|4	5	2.5	2	6|15|4|2|2|0|0|2|7|6|6|2|2|4|3|4|6|1|2|2|13|5|11|3|1|13|8|8|1|9|9|1|4|1|1|0|0|7|5	0	0	0	0	0	-41.74	0.25	0.88
IKZF3	Q14103	HNRNPD	20|15	35	17.5	2	6|15|4|2|2|0|0|2|7|6|6|2|2|4|3|4|6|1|2|2|13|5|11|3|1|13|8|8|1|9|9|1|4|1|1|0|0|7|5	0	0	0	0	0	-16.19	1.75	0.76
ZBTB6	Q14103	HNRNPD	5|6	11	5.5	2	6|15|4|2|2|0|0|2|7|6|6|2|2|4|3|4|6|1|2|2|13|5|11|3|1|13|8|8|1|9|9|1|4|1|1|0|0|7|5	0	0	0	0	0	-31.66	0.55	0.86
ZNF140	Q14103	HNRNPD	2|4	6	3	2	6|15|4|2|2|0|0|2|7|6|6|2|2|4|3|4|6|1|2|2|13|5|11|3|1|13|8|8|1|9|9|1|4|1|1|0|0|7|5	0	0	0	0	0	-38.73	0.3	0.88
ZNF708	Q14103	HNRNPD	3|3	6	3	2	6|15|4|2|2|0|0|2|7|6|6|2|2|4|3|4|6|1|2|2|13|5|11|3|1|13|8|8|1|9|9|1|4|1|1|0|0|7|5	0	0	0	0	0	-36.11	0.3	0.88
FEZF1	Q14103	HNRNPD	5|3	8	4	2	6|15|4|2|2|0|0|2|7|6|6|2|2|4|3|4|6|1|2|2|13|5|11|3|1|13|8|8|1|9|9|1|4|1|1|0|0|7|5	0	0	0	0	0	-36.11	0.4	0.86
MZF1	Q14103	HNRNPD	7|3	10	5	2	6|15|4|2|2|0|0|2|7|6|6|2|2|4|3|4|6|1|2|2|13|5|11|3|1|13|8|8|1|9|9|1|4|1|1|0|0|7|5	0	0	0	0	0	-36.11	0.5	0.86
ZBTB14	Q14103	HNRNPD	5|4	9	4.5	2	6|15|4|2|2|0|0|2|7|6|6|2|2|4|3|4|6|1|2|2|13|5|11|3|1|13|8|8|1|9|9|1|4|1|1|0|0|7|5	0	0	0	0	0	-33.78	0.45	0.86
ZBTB42	Q14103	HNRNPD	2|2	4	2	2	6|15|4|2|2|0|0|2|7|6|6|2|2|4|3|4|6|1|2|2|13|5|11|3|1|13|8|8|1|9|9|1|4|1|1|0|0|7|5	0	0	0	0	0	-38.73	0.2	0.88
ZNF8	Q14103	HNRNPD	0|5	5	2.5	2	6|15|4|2|2|0|0|2|7|6|6|2|2|4|3|4|6|1|2|2|13|5|11|3|1|13|8|8|1|9|9|1|4|1|1|0|0|7|5	0	0	0	0	0	-45.45	0.25	0.86
KLF7	Q14103	HNRNPD	8|6	14	7	2	6|15|4|2|2|0|0|2|7|6|6|2|2|4|3|4|6|1|2|2|13|5|11|3|1|13|8|8|1|9|9|1|4|1|1|0|0|7|5	0	0	0	0	0	-29.72	0.7	0.86
ZNF669	Q14103	HNRNPD	7|6	13	6.5	2	6|15|4|2|2|0|0|2|7|6|6|2|2|4|3|4|6|1|2|2|13|5|11|3|1|13|8|8|1|9|9|1|4|1|1|0|0|7|5	0	0	0	0	0	-29.72	0.65	0.86
ZNF436	Q14103	HNRNPD	4|5	9	4.5	2	6|15|4|2|2|0|0|2|7|6|6|2|2|4|3|4|6|1|2|2|13|5|11|3|1|13|8|8|1|9|9|1|4|1|1|0|0|7|5	0	0	0	0	0	-33.78	0.45	0.86
ZSCAN5C	Q14103	HNRNPD	6|6	12	6	2	6|15|4|2|2|0|0|2|7|6|6|2|2|4|3|4|6|1|2|2|13|5|11|3|1|13|8|8|1|9|9|1|4|1|1|0|0|7|5	0	0	0	0	0	-29.72	0.6	0.86
KLF1	Q14103	HNRNPD	16|11	27	13.5	2	6|15|4|2|2|0|0|2|7|6|6|2|2|4|3|4|6|1|2|2|13|5|11|3|1|13|8|8|1|9|9|1|4|1|1|0|0|7|5	0	0	0	0	0	-21.84	1.35	0.82
ZNF418	Q14103	HNRNPD	1|1	2	1	2	6|15|4|2|2|0|0|2|7|6|6|2|2|4|3|4|6|1|2|2|13|5|11|3|1|13|8|8|1|9|9|1|4|1|1|0|0|7|5	0	0	0	0	0	-41.74	0.1	0.88
ZNF513	Q14103	HNRNPD	1|1	2	1	2	6|15|4|2|2|0|0|2|7|6|6|2|2|4|3|4|6|1|2|2|13|5|11|3|1|13|8|8|1|9|9|1|4|1|1|0|0|7|5	0	0	0	0	0	-41.74	0.1	0.88
ZNF184	Q14103	HNRNPD	1|1	2	1	2	6|15|4|2|2|0|0|2|7|6|6|2|2|4|3|4|6|1|2|2|13|5|11|3|1|13|8|8|1|9|9|1|4|1|1|0|0|7|5	0	0	0	0	0	-41.74	0.1	0.88
ZIM3	Q14103	HNRNPD	0|6	6	3	2	6|15|4|2|2|0|0|2|7|6|6|2|2|4|3|4|6|1|2|2|13|5|11|3|1|13|8|8|1|9|9|1|4|1|1|0|0|7|5	0	0	0	0	0	-45.45	0.3	0.86
ZNF324	Q14103	HNRNPD	1|3	4	2	2	6|15|4|2|2|0|0|2|7|6|6|2|2|4|3|4|6|1|2|2|13|5|11|3|1|13|8|8|1|9|9|1|4|1|1|0|0|7|5	0	0	0	0	0	-41.74	0.2	0.88
ZFP28	Q14103	HNRNPD	2|2	4	2	2	6|15|4|2|2|0|0|2|7|6|6|2|2|4|3|4|6|1|2|2|13|5|11|3|1|13|8|8|1|9|9|1|4|1|1|0|0|7|5	0	0	0	0	0	-38.73	0.2	0.88
ZNF320	Q14103	HNRNPD	13|7	20	10	2	6|15|4|2|2|0|0|2|7|6|6|2|2|4|3|4|6|1|2|2|13|5|11|3|1|13|8|8|1|9|9|1|4|1|1|0|0|7|5	0	0	0	0	0	-27.94	1	0.84
ZNF322	Q14103	HNRNPD	22|28	50	25	2	6|15|4|2|2|0|0|2|7|6|6|2|2|4|3|4|6|1|2|2|13|5|11|3|1|13|8|8|1|9|9|1|4|1|1|0|0|7|5	0.34	0.68	0.34	0.68	0.34	-6.82	2.5	0.36
ZNF189	Q14103	HNRNPD	1|1	2	1	2	6|15|4|2|2|0|0|2|7|6|6|2|2|4|3|4|6|1|2|2|13|5|11|3|1|13|8|8|1|9|9|1|4|1|1|0|0|7|5	0	0	0	0	0	-41.74	0.1	0.88
ZNF329	Q14103	HNRNPD	0|2	2	1	2	6|15|4|2|2|0|0|2|7|6|6|2|2|4|3|4|6|1|2|2|13|5|11|3|1|13|8|8|1|9|9|1|4|1|1|0|0|7|5	0	0	0	0	0	-45.45	0.1	0.88
OSR2	Q14103	HNRNPD	7|5	12	6	2	6|15|4|2|2|0|0|2|7|6|6|2|2|4|3|4|6|1|2|2|13|5|11|3|1|13|8|8|1|9|9|1|4|1|1|0|0|7|5	0	0	0	0	0	-31.66	0.6	0.86
ZNF768	Q14103	HNRNPD	4|4	8	4	2	6|15|4|2|2|0|0|2|7|6|6|2|2|4|3|4|6|1|2|2|13|5|11|3|1|13|8|8|1|9|9|1|4|1|1|0|0|7|5	0	0	0	0	0	-33.78	0.4	0.88
ZNF582	Q14103	HNRNPD	0|8	8	4	2	6|15|4|2|2|0|0|2|7|6|6|2|2|4|3|4|6|1|2|2|13|5|11|3|1|13|8|8|1|9|9|1|4|1|1|0|0|7|5	0	0	0	0	0	-45.45	0.4	0.86
MYNN	Q14103	HNRNPD	6|10	16	8	2	6|15|4|2|2|0|0|2|7|6|6|2|2|4|3|4|6|1|2|2|13|5|11|3|1|13|8|8|1|9|9|1|4|1|1|0|0|7|5	0	0	0	0	0	-29.72	0.8	0.85
ZFP82	Q14103	HNRNPD	8|4	12	6	2	6|15|4|2|2|0|0|2|7|6|6|2|2|4|3|4|6|1|2|2|13|5|11|3|1|13|8|8|1|9|9|1|4|1|1|0|0|7|5	0	0	0	0	0	-33.78	0.6	0.86
PATZ1	Q14103	HNRNPD	6|12	18	9	2	6|15|4|2|2|0|0|2|7|6|6|2|2|4|3|4|6|1|2|2|13|5|11|3|1|13|8|8|1|9|9|1|4|1|1|0|0|7|5	0	0	0	0	0	-29.72	0.9	0.84
ZNF549	Q14103	HNRNPD	1|1	2	1	2	6|15|4|2|2|0|0|2|7|6|6|2|2|4|3|4|6|1|2|2|13|5|11|3|1|13|8|8|1|9|9|1|4|1|1|0|0|7|5	0	0	0	0	0	-41.74	0.1	0.88
ZNF610	Q14103	HNRNPD	1|1	2	1	2	6|15|4|2|2|0|0|2|7|6|6|2|2|4|3|4|6|1|2|2|13|5|11|3|1|13|8|8|1|9|9|1|4|1|1|0|0|7|5	0	0	0	0	0	-41.74	0.1	0.88
ZNF394	Q14103	HNRNPD	3|3	6	3	2	6|15|4|2|2|0|0|2|7|6|6|2|2|4|3|4|6|1|2|2|13|5|11|3|1|13|8|8|1|9|9|1|4|1|1|0|0|7|5	0	0	0	0	0	-36.11	0.3	0.88
MAZ	Q14103	HNRNPD	10|28	38	19	2	6|15|4|2|2|0|0|2|7|6|6|2|2|4|3|4|6|1|2|2|13|5|11|3|1|13|8|8|1|9|9|1|4|1|1|0|0|7|5	0.34	0.68	0.34	0.68	0.34	-23.29	1.9	0.36
ZNF449	Q14103	HNRNPD	4|5	9	4.5	2	6|15|4|2|2|0|0|2|7|6|6|2|2|4|3|4|6|1|2|2|13|5|11|3|1|13|8|8|1|9|9|1|4|1|1|0|0|7|5	0	0	0	0	0	-33.78	0.45	0.86
GTF3A	Q14103	HNRNPD	6|4	10	5	2	6|15|4|2|2|0|0|2|7|6|6|2|2|4|3|4|6|1|2|2|13|5|11|3|1|13|8|8|1|9|9|1|4|1|1|0|0|7|5	0	0	0	0	0	-33.78	0.5	0.86
ZNF547	Q14103	HNRNPD	13|10	23	11.5	2	6|15|4|2|2|0|0|2|7|6|6|2|2|4|3|4|6|1|2|2|13|5|11|3|1|13|8|8|1|9|9|1|4|1|1|0|0|7|5	0	0	0	0	0	-23.29	1.15	0.84
PRDM1	Q14103	HNRNPD	5|6	11	5.5	2	6|15|4|2|2|0|0|2|7|6|6|2|2|4|3|4|6|1|2|2|13|5|11|3|1|13|8|8|1|9|9|1|4|1|1|0|0|7|5	0	0	0	0	0	-31.66	0.55	0.86
ZNF778	Q14103	HNRNPD	2|2	4	2	2	6|15|4|2|2|0|0|2|7|6|6|2|2|4|3|4|6|1|2|2|13|5|11|3|1|13|8|8|1|9|9|1|4|1|1|0|0|7|5	0	0	0	0	0	-38.73	0.2	0.88
ZNF596	Q14103	HNRNPD	4|7	11	5.5	2	6|15|4|2|2|0|0|2|7|6|6|2|2|4|3|4|6|1|2|2|13|5|11|3|1|13|8|8|1|9|9|1|4|1|1|0|0|7|5	0	0	0	0	0	-33.78	0.55	0.86
ZNF502	Q14103	HNRNPD	9|9	18	9	2	6|15|4|2|2|0|0|2|7|6|6|2|2|4|3|4|6|1|2|2|13|5|11|3|1|13|8|8|1|9|9|1|4|1|1|0|0|7|5	0	0	0	0	0	-24.74	0.9	0.85
ZNF563	Q14103	HNRNPD	4|5	9	4.5	2	6|15|4|2|2|0|0|2|7|6|6|2|2|4|3|4|6|1|2|2|13|5|11|3|1|13|8|8|1|9|9|1|4|1|1|0|0|7|5	0	0	0	0	0	-33.78	0.45	0.86
ZNF770	Q14103	HNRNPD	1|1	2	1	2	6|15|4|2|2|0|0|2|7|6|6|2|2|4|3|4|6|1|2|2|13|5|11|3|1|13|8|8|1|9|9|1|4|1|1|0|0|7|5	0	0	0	0	0	-41.74	0.1	0.88
ZSCAN30	Q14103	HNRNPD	12|16	28	14	2	6|15|4|2|2|0|0|2|7|6|6|2|2|4|3|4|6|1|2|2|13|5|11|3|1|13|8|8|1|9|9|1|4|1|1|0|0|7|5	0	0	0	0	0	-20.41	1.4	0.82
ZNF394	O43423	O43423	0|2	2	1	2	0|0|0|0|0|0|0|2|2|0|0|0|0|0|0|0|0|0|1|0|0|2|0|0|0|0|0|0|0|0|0|0|0|0|0|0|0|0|0	0.05	0.11	0.05	0.11	0.05	-5.17	1.43	0.55
ZIM3	O43423	O43423	0|1	1	0.5	2	0|0|0|0|0|0|0|2|2|0|0|0|0|0|0|0|0|0|1|0|0|2|0|0|0|0|0|0|0|0|0|0|0|0|0|0|0|0|0	0	0	0	0	0	-5.17	0.71	0.88
ZNF140	P16152	CBR1	0|2	2	1	2	0|17|0|0|0|0|0|0|0|0|0|0|0|0|0|4|0|0|5|1|15|0|4|3|0|8|7|4|0|1|2|1|1|1|4|0|1|0|0	0	0	0	0	0	-32.07	0.14	0.88
ZNF708	P16152	CBR1	4|0	4	2	2	0|17|0|0|0|0|0|0|0|0|0|0|0|0|0|4|0|0|5|1|15|0|4|3|0|8|7|4|0|1|2|1|1|1|4|0|1|0|0	0	0	0	0	0	-32.07	0.28	0.85
KLF1	P16152	CBR1	14|0	14	7	2	0|17|0|0|0|0|0|0|0|0|0|0|0|0|0|4|0|0|5|1|15|0|4|3|0|8|7|4|0|1|2|1|1|1|4|0|1|0|0	0	0	0	0	0	-32.07	0.99	0.75
ZNF322	P16152	CBR1	17|17	34	17	2	0|17|0|0|0|0|0|0|0|0|0|0|0|0|0|4|0|0|5|1|15|0|4|3|0|8|7|4|0|1|2|1|1|1|4|0|1|0|0	0	0	0	0	0	-5.55	2.39	0.67
MAZ	P16152	CBR1	0|10	10	5	2	0|17|0|0|0|0|0|0|0|0|0|0|0|0|0|4|0|0|5|1|15|0|4|3|0|8|7|4|0|1|2|1|1|1|4|0|1|0|0	0	0	0	0	0	-32.07	0.7	0.8
OSR2	P16152	CBR1	0|1	1	0.5	2	0|17|0|0|0|0|0|0|0|0|0|0|0|0|0|4|0|0|5|1|15|0|4|3|0|8|7|4|0|1|2|1|1|1|4|0|1|0|0	0	0	0	0	0	-32.07	0.07	0.88
KLF7	P16152	CBR1	2|0	2	1	2	0|17|0|0|0|0|0|0|0|0|0|0|0|0|0|4|0|0|5|1|15|0|4|3|0|8|7|4|0|1|2|1|1|1|4|0|1|0|0	0	0	0	0	0	-32.07	0.14	0.88
ZNF596	P16152	CBR1	0|3	3	1.5	2	0|17|0|0|0|0|0|0|0|0|0|0|0|0|0|4|0|0|5|1|15|0|4|3|0|8|7|4|0|1|2|1|1|1|4|0|1|0|0	0	0	0	0	0	-32.07	0.21	0.85
ZNF594	P16152	CBR1	14|0	14	7	2	0|17|0|0|0|0|0|0|0|0|0|0|0|0|0|4|0|0|5|1|15|0|4|3|0|8|7|4|0|1|2|1|1|1|4|0|1|0|0	0	0	0	0	0	-32.07	0.99	0.75
PATZ1	P16152	CBR1	0|8	8	4	2	0|17|0|0|0|0|0|0|0|0|0|0|0|0|0|4|0|0|5|1|15|0|4|3|0|8|7|4|0|1|2|1|1|1|4|0|1|0|0	0	0	0	0	0	-32.07	0.56	0.82
ZNF394	P16152	CBR1	5|0	5	2.5	2	0|17|0|0|0|0|0|0|0|0|0|0|0|0|0|4|0|0|5|1|15|0|4|3|0|8|7|4|0|1|2|1|1|1|4|0|1|0|0	0	0	0	0	0	-32.07	0.35	0.84
IKZF3	P16152	CBR1	10|8	18	9	2	0|17|0|0|0|0|0|0|0|0|0|0|0|0|0|4|0|0|5|1|15|0|4|3|0|8|7|4|0|1|2|1|1|1|4|0|1|0|0	0	0	0	0	0	-15.44	1.27	0.8
ZSCAN30	P16152	CBR1	4|7	11	5.5	2	0|17|0|0|0|0|0|0|0|0|0|0|0|0|0|4|0|0|5|1|15|0|4|3|0|8|7|4|0|1|2|1|1|1|4|0|1|0|0	0	0	0	0	0	-21.75	0.77	0.83
ZNF331	P52209	PGD	0|5	5	2.5	2	2|13|2|0|0|0|0|2|1|0|0|0|0|0|4|10|0|0|8|1|16|2|4|1|0|15|12|7|0|5|8|3|8|3|6|2|3|0|0	0	0	0	0	0	-46.82	0.24	0.87
ZNF250	P52209	PGD	4|6	10	5	2	2|13|2|0|0|0|0|2|1|0|0|0|0|0|4|10|0|0|8|1|16|2|4|1|0|15|12|7|0|5|8|3|8|3|6|2|3|0|0	0	0	0	0	0	-35.03	0.49	0.86
ZNF490	P52209	PGD	0|1	1	0.5	2	2|13|2|0|0|0|0|2|1|0|0|0|0|0|4|10|0|0|8|1|16|2|4|1|0|15|12|7|0|5|8|3|8|3|6|2|3|0|0	0	0	0	0	0	-46.82	0.05	0.88
SCRT1	P52209	PGD	5|2	7	3.5	2	2|13|2|0|0|0|0|2|1|0|0|0|0|0|4|10|0|0|8|1|16|2|4|1|0|15|12|7|0|5|8|3|8|3|6|2|3|0|0	0	0	0	0	0	-40.04	0.34	0.87
ZNF594	P52209	PGD	18|0	18	9	2	2|13|2|0|0|0|0|2|1|0|0|0|0|0|4|10|0|0|8|1|16|2|4|1|0|15|12|7|0|5|8|3|8|3|6|2|3|0|0	0	0	0	0	0	-46.82	0.87	0.8
ZNF419	P52209	PGD	0|2	2	1	2	2|13|2|0|0|0|0|2|1|0|0|0|0|0|4|10|0|0|8|1|16|2|4|1|0|15|12|7|0|5|8|3|8|3|6|2|3|0|0	0	0	0	0	0	-46.82	0.1	0.88
ZNF816	P52209	PGD	0|2	2	1	2	2|13|2|0|0|0|0|2|1|0|0|0|0|0|4|10|0|0|8|1|16|2|4|1|0|15|12|7|0|5|8|3|8|3|6|2|3|0|0	0	0	0	0	0	-46.82	0.1	0.88
ZSCAN5C	P52209	PGD	2|4	6	3	2	2|13|2|0|0|0|0|2|1|0|0|0|0|0|4|10|0|0|8|1|16|2|4|1|0|15|12|7|0|5|8|3|8|3|6|2|3|0|0	0	0	0	0	0	-40.04	0.29	0.87
ZBTB6	P52209	PGD	1|2	3	1.5	2	2|13|2|0|0|0|0|2|1|0|0|0|0|0|4|10|0|0|8|1|16|2|4|1|0|15|12|7|0|5|8|3|8|3|6|2|3|0|0	0	0	0	0	0	-43.08	0.15	0.88
ZNF140	P52209	PGD	0|2	2	1	2	2|13|2|0|0|0|0|2|1|0|0|0|0|0|4|10|0|0|8|1|16|2|4|1|0|15|12|7|0|5|8|3|8|3|6|2|3|0|0	0	0	0	0	0	-46.82	0.1	0.88
ZNF708	P52209	PGD	4|0	4	2	2	2|13|2|0|0|0|0|2|1|0|0|0|0|0|4|10|0|0|8|1|16|2|4|1|0|15|12|7|0|5|8|3|8|3|6|2|3|0|0	0	0	0	0	0	-46.82	0.19	0.87
KLF7	P52209	PGD	6|1	7	3.5	2	2|13|2|0|0|0|0|2|1|0|0|0|0|0|4|10|0|0|8|1|16|2|4|1|0|15|12|7|0|5|8|3|8|3|6|2|3|0|0	0	0	0	0	0	-43.08	0.34	0.86
ZNF436	P52209	PGD	6|0	6	3	2	2|13|2|0|0|0|0|2|1|0|0|0|0|0|4|10|0|0|8|1|16|2|4|1|0|15|12|7|0|5|8|3|8|3|6|2|3|0|0	0	0	0	0	0	-46.82	0.29	0.86
IKZF3	P52209	PGD	20|10	30	15	2	2|13|2|0|0|0|0|2|1|0|0|0|0|0|4|10|0|0|8|1|16|2|4|1|0|15|12|7|0|5|8|3|8|3|6|2|3|0|0	0	0	0	0	0	-24.37	1.46	0.78
KLF1	P52209	PGD	13|2	15	7.5	2	2|13|2|0|0|0|0|2|1|0|0|0|0|0|4|10|0|0|8|1|16|2|4|1|0|15|12|7|0|5|8|3|8|3|6|2|3|0|0	0	0	0	0	0	-40.04	0.73	0.84
ZIM3	P52209	PGD	0|2	2	1	2	2|13|2|0|0|0|0|2|1|0|0|0|0|0|4|10|0|0|8|1|16|2|4|1|0|15|12|7|0|5|8|3|8|3|6|2|3|0|0	0	0	0	0	0	-46.82	0.1	0.88
ZNF320	P52209	PGD	6|0	6	3	2	2|13|2|0|0|0|0|2|1|0|0|0|0|0|4|10|0|0|8|1|16|2|4|1|0|15|12|7|0|5|8|3|8|3|6|2|3|0|0	0	0	0	0	0	-46.82	0.29	0.86
ZNF322	P52209	PGD	15|16	31	15.5	2	2|13|2|0|0|0|0|2|1|0|0|0|0|0|4|10|0|0|8|1|16|2|4|1|0|15|12|7|0|5|8|3|8|3|6|2|3|0|0	0	0	0	0	0	-17.22	1.5	0.82
ZNF768	P52209	PGD	1|0	1	0.5	2	2|13|2|0|0|0|0|2|1|0|0|0|0|0|4|10|0|0|8|1|16|2|4|1|0|15|12|7|0|5|8|3|8|3|6|2|3|0|0	0	0	0	0	0	-46.82	0.05	0.88
MYNN	P52209	PGD	1|2	3	1.5	2	2|13|2|0|0|0|0|2|1|0|0|0|0|0|4|10|0|0|8|1|16|2|4|1|0|15|12|7|0|5|8|3|8|3|6|2|3|0|0	0	0	0	0	0	-43.08	0.15	0.88
PATZ1	P52209	PGD	0|9	9	4.5	2	2|13|2|0|0|0|0|2|1|0|0|0|0|0|4|10|0|0|8|1|16|2|4|1|0|15|12|7|0|5|8|3|8|3|6|2|3|0|0	0	0	0	0	0	-46.82	0.44	0.86
MAZ	P52209	PGD	0|17	17	8.5	2	2|13|2|0|0|0|0|2|1|0|0|0|0|0|4|10|0|0|8|1|16|2|4|1|0|15|12|7|0|5|8|3|8|3|6|2|3|0|0	0	0	0	0	0	-46.82	0.83	0.82
ZNF778	P52209	PGD	0|1	1	0.5	2	2|13|2|0|0|0|0|2|1|0|0|0|0|0|4|10|0|0|8|1|16|2|4|1|0|15|12|7|0|5|8|3|8|3|6|2|3|0|0	0	0	0	0	0	-46.82	0.05	0.88
ZNF596	P52209	PGD	0|1	1	0.5	2	2|13|2|0|0|0|0|2|1|0|0|0|0|0|4|10|0|0|8|1|16|2|4|1|0|15|12|7|0|5|8|3|8|3|6|2|3|0|0	0	0	0	0	0	-46.82	0.05	0.88
ZNF502	P52209	PGD	1|1	2	1	2	2|13|2|0|0|0|0|2|1|0|0|0|0|0|4|10|0|0|8|1|16|2|4|1|0|15|12|7|0|5|8|3|8|3|6|2|3|0|0	0	0	0	0	0	-43.08	0.1	0.88
ZNF394	P52209	PGD	3|1	4	2	2	2|13|2|0|0|0|0|2|1|0|0|0|0|0|4|10|0|0|8|1|16|2|4|1|0|15|12|7|0|5|8|3|8|3|6|2|3|0|0	0	0	0	0	0	-43.08	0.19	0.88
ZNF770	P52209	PGD	0|2	2	1	2	2|13|2|0|0|0|0|2|1|0|0|0|0|0|4|10|0|0|8|1|16|2|4|1|0|15|12|7|0|5|8|3|8|3|6|2|3|0|0	0	0	0	0	0	-46.82	0.1	0.88
ZSCAN30	P52209	PGD	9|16	25	12.5	2	2|13|2|0|0|0|0|2|1|0|0|0|0|0|4|10|0|0|8|1|16|2|4|1|0|15|12|7|0|5|8|3|8|3|6|2|3|0|0	0	0	0	0	0	-25.84	1.21	0.82
ZNF140	P99999	CYCS	0|1	1	0.5	2	0|6|2|0|0|0|0|0|0|0|0|0|0|0|0|0|0|0|0|0|2|0|0|0|0|3|3|0|0|0|0|0|0|0|1|0|0|0|0	0	0	0	0	0	-8.95	0.29	0.88
ZNF594	P99999	CYCS	8|0	8	4	2	0|6|2|0|0|0|0|0|0|0|0|0|0|0|0|0|0|0|0|0|2|0|0|0|0|3|3|0|0|0|0|0|0|0|1|0|0|0|0	0.28	0.56	0.28	0.56	0.28	-8.95	2.35	0.38
ZNF322	P99999	CYCS	9|8	17	8.5	2	0|6|2|0|0|0|0|0|0|0|0|0|0|0|0|0|0|0|0|0|2|0|0|0|0|3|3|0|0|0|0|0|0|0|1|0|0|0|0	0.62	0.68	0.62	0.68	0.62	0.23	5	0.09
ZNF250	P99999	CYCS	1|2	3	1.5	2	0|6|2|0|0|0|0|0|0|0|0|0|0|0|0|0|0|0|0|0|2|0|0|0|0|3|3|0|0|0|0|0|0|0|1|0|0|0|0	0	0	0	0	0	-7.01	0.88	0.69
MAZ	P99999	CYCS	0|8	8	4	2	0|6|2|0|0|0|0|0|0|0|0|0|0|0|0|0|0|0|0|0|2|0|0|0|0|3|3|0|0|0|0|0|0|0|1|0|0|0|0	0.28	0.56	0.28	0.56	0.28	-8.95	2.35	0.38
ZNF331	P99999	CYCS	0|2	2	1	2	0|6|2|0|0|0|0|0|0|0|0|0|0|0|0|0|0|0|0|0|2|0|0|0|0|3|3|0|0|0|0|0|0|0|1|0|0|0|0	0	0	0	0	0	-8.95	0.59	0.69
KLF1	P99999	CYCS	4|0	4	2	2	0|6|2|0|0|0|0|0|0|0|0|0|0|0|0|0|0|0|0|0|2|0|0|0|0|3|3|0|0|0|0|0|0|0|1|0|0|0|0	0.03	0.06	0.03	0.06	0.03	-8.95	1.18	0.59
PATZ1	P99999	CYCS	0|3	3	1.5	2	0|6|2|0|0|0|0|0|0|0|0|0|0|0|0|0|0|0|0|0|2|0|0|0|0|3|3|0|0|0|0|0|0|0|1|0|0|0|0	0.01	0.02	0.01	0.02	0.01	-8.95	0.88	0.64
ZBTB6	P99999	CYCS	0|1	1	0.5	2	0|6|2|0|0|0|0|0|0|0|0|0|0|0|0|0|0|0|0|0|2|0|0|0|0|3|3|0|0|0|0|0|0|0|1|0|0|0|0	0	0	0	0	0	-8.95	0.29	0.88
ZIM3	P99999	CYCS	0|1	1	0.5	2	0|6|2|0|0|0|0|0|0|0|0|0|0|0|0|0|0|0|0|0|2|0|0|0|0|3|3|0|0|0|0|0|0|0|1|0|0|0|0	0	0	0	0	0	-8.95	0.29	0.88
ZNF394	P99999	CYCS	3|1	4	2	2	0|6|2|0|0|0|0|0|0|0|0|0|0|0|0|0|0|0|0|0|2|0|0|0|0|3|3|0|0|0|0|0|0|0|1|0|0|0|0	0.01	0.02	0.01	0.02	0.01	-7.01	1.18	0.64
IKZF3	P99999	CYCS	6|2	8	4	2	0|6|2|0|0|0|0|0|0|0|0|0|0|0|0|0|0|0|0|0|2|0|0|0|0|3|3|0|0|0|0|0|0|0|1|0|0|0|0	0.14	0.27	0.14	0.27	0.14	-5.31	2.35	0.47
ZSCAN30	P99999	CYCS	2|6	8	4	2	0|6|2|0|0|0|0|0|0|0|0|0|0|0|0|0|0|0|0|0|2|0|0|0|0|3|3|0|0|0|0|0|0|0|1|0|0|0|0	0.14	0.27	0.14	0.27	0.14	-5.31	2.35	0.47
MZF1	Q5VZL5	ZMYM4	35|33	68	34	2	0|0|0|0|0|0|0|0|0|0|0|0|0|0|0|0|0|0|0|0|0|0|0|0|0|0|0|0|0|2|1|0|0|0|0|0|0|0|0	1	1	1	1	1	29.43	113.33	0
ZNF189	Q5VZL5	ZMYM4	18|31	49	24.5	2	0|0|0|0|0|0|0|0|0|0|0|0|0|0|0|0|0|0|0|0|0|0|0|0|0|0|0|0|0|2|1|0|0|0|0|0|0|0|0	1	1	1	1	1	15.71	81.67	0
ZNF449	Q5VZL5	ZMYM4	1|0	1	0.5	2	0|0|0|0|0|0|0|0|0|0|0|0|0|0|0|0|0|0|0|0|0|0|0|0|0|0|0|0|0|2|1|0|0|0|0|0|0|0|0	0	0	0	0	0	-3.74	1.67	0.88
ZNF778	Q5VZL5	ZMYM4	0|2	2	1	2	0|0|0|0|0|0|0|0|0|0|0|0|0|0|0|0|0|0|0|0|0|0|0|0|0|0|0|0|0|2|1|0|0|0|0|0|0|0|0	0.18	0.36	0.18	0.36	0.18	-3.74	3.33	0.44
ZNF490	Q5VZL5	ZMYM4	3|3	6	3	2	0|0|0|0|0|0|0|0|0|0|0|0|0|0|0|0|0|0|0|0|0|0|0|0|0|0|0|0|0|2|1|0|0|0|0|0|0|0|0	0.66	0.66	0.66	0.66	0.66	0.65	10	0.08
ZNF549	Q5VZL5	ZMYM4	1|0	1	0.5	2	0|0|0|0|0|0|0|0|0|0|0|0|0|0|0|0|0|0|0|0|0|0|0|0|0|0|0|0|0|2|1|0|0|0|0|0|0|0|0	0	0	0	0	0	-3.74	1.67	0.88
ZSCAN5C	Q5VZL5	ZMYM4	90|81	171	85.5	2	0|0|0|0|0|0|0|0|0|0|0|0|0|0|0|0|0|0|0|0|0|0|0|0|0|0|0|0|0|2|1|0|0|0|0|0|0|0|0	1	1	1	1	1	71.88	285	0
ZNF816	Q00987	MDM2	0|1	1	0.5	2	0|0|0|0|0|0|0|0|0|0|0|0|0|0|0|0|0|0|0|0|0|0|0|0|0|0|0|0|0|0|0|0|0|0|0|0|0|0|0	0	0	0	0	0	-3	5	0.88
ZNF667	Q00987	MDM2	2|0	2	1	2	0|0|0|0|0|0|0|0|0|0|0|0|0|0|0|0|0|0|0|0|0|0|0|0|0|0|0|0|0|0|0|0|0|0|0|0|0|0|0	0.41	0.82	0.41	0.82	0.41	-3	10	0.28
ZBTB42	P30876	POLR2B	1|0	1	0.5	2	0|0|0|0|0|0|0|0|0|0|0|0|0|0|0|0|0|0|0|0|0|0|0|0|0|0|0|0|0|1|5|0|2|0|1|0|0|0|0	0	0	0	0	0	-6.15	0.56	0.88
ZNF778	P30876	POLR2B	1|0	1	0.5	2	0|0|0|0|0|0|0|0|0|0|0|0|0|0|0|0|0|0|0|0|0|0|0|0|0|0|0|0|0|1|5|0|2|0|1|0|0|0|0	0	0	0	0	0	-6.15	0.56	0.88
ZSCAN30	P30876	POLR2B	1|0	1	0.5	2	0|0|0|0|0|0|0|0|0|0|0|0|0|0|0|0|0|0|0|0|0|0|0|0|0|0|0|0|0|1|5|0|2|0|1|0|0|0|0	0	0	0	0	0	-6.15	0.56	0.88
MAZ	P30876	POLR2B	1|0	1	0.5	2	0|0|0|0|0|0|0|0|0|0|0|0|0|0|0|0|0|0|0|0|0|0|0|0|0|0|0|0|0|1|5|0|2|0|1|0|0|0|0	0	0	0	0	0	-6.15	0.56	0.88
ZNF189	P30876	POLR2B	0|1	1	0.5	2	0|0|0|0|0|0|0|0|0|0|0|0|0|0|0|0|0|0|0|0|0|0|0|0|0|0|0|0|0|1|5|0|2|0|1|0|0|0|0	0	0	0	0	0	-6.15	0.56	0.88
ZNF547	P30876	POLR2B	1|0	1	0.5	2	0|0|0|0|0|0|0|0|0|0|0|0|0|0|0|0|0|0|0|0|0|0|0|0|0|0|0|0|0|1|5|0|2|0|1|0|0|0|0	0	0	0	0	0	-6.15	0.56	0.88
GTF3A	P30876	POLR2B	0|2	2	1	2	0|0|0|0|0|0|0|0|0|0|0|0|0|0|0|0|0|0|0|0|0|0|0|0|0|0|0|0|0|1|5|0|2|0|1|0|0|0|0	0.04	0.09	0.04	0.09	0.04	-6.15	1.11	0.56
ZNF34	P30876	POLR2B	0|1	1	0.5	2	0|0|0|0|0|0|0|0|0|0|0|0|0|0|0|0|0|0|0|0|0|0|0|0|0|0|0|0|0|1|5|0|2|0|1|0|0|0|0	0	0	0	0	0	-6.15	0.56	0.88
ZNF768	P30876	POLR2B	3|0	3	1.5	2	0|0|0|0|0|0|0|0|0|0|0|0|0|0|0|0|0|0|0|0|0|0|0|0|0|0|0|0|0|1|5|0|2|0|1|0|0|0|0	0.1	0.2	0.1	0.2	0.1	-6.15	1.67	0.5
KLF1	P30876	POLR2B	0|1	1	0.5	2	0|0|0|0|0|0|0|0|0|0|0|0|0|0|0|0|0|0|0|0|0|0|0|0|0|0|0|0|0|1|5|0|2|0|1|0|0|0|0	0	0	0	0	0	-6.15	0.56	0.88
ZNF490	P30876	POLR2B	0|1	1	0.5	2	0|0|0|0|0|0|0|0|0|0|0|0|0|0|0|0|0|0|0|0|0|0|0|0|0|0|0|0|0|1|5|0|2|0|1|0|0|0|0	0	0	0	0	0	-6.15	0.56	0.88
ZNF513	P30876	POLR2B	0|1	1	0.5	2	0|0|0|0|0|0|0|0|0|0|0|0|0|0|0|0|0|0|0|0|0|0|0|0|0|0|0|0|0|1|5|0|2|0|1|0|0|0|0	0	0	0	0	0	-6.15	0.56	0.88
ZNF16	P30876	POLR2B	1|1	2	1	2	0|0|0|0|0|0|0|0|0|0|0|0|0|0|0|0|0|0|0|0|0|0|0|0|0|0|0|0|0|1|5|0|2|0|1|0|0|0|0	0	0	0	0	0	-3.82	1.11	0.88
ZNF71	P30876	POLR2B	1|0	1	0.5	2	0|0|0|0|0|0|0|0|0|0|0|0|0|0|0|0|0|0|0|0|0|0|0|0|0|0|0|0|0|1|5|0|2|0|1|0|0|0|0	0	0	0	0	0	-6.15	0.56	0.88
PATZ1	P30876	POLR2B	0|1	1	0.5	2	0|0|0|0|0|0|0|0|0|0|0|0|0|0|0|0|0|0|0|0|0|0|0|0|0|0|0|0|0|1|5|0|2|0|1|0|0|0|0	0	0	0	0	0	-6.15	0.56	0.88
ZNF667	P30876	POLR2B	3|1	4	2	2	0|0|0|0|0|0|0|0|0|0|0|0|0|0|0|0|0|0|0|0|0|0|0|0|0|0|0|0|0|1|5|0|2|0|1|0|0|0|0	0.1	0.2	0.1	0.2	0.1	-3.82	2.22	0.5
ZNF250	O75366	AVIL	0|1	1	0.5	2	0|0|0|0|0|0|0|0|0|0|0|0|0|0|0|0|0|0|0|0|0|0|0|0|0|0|0|0|0|0|0|0|0|0|0|0|0|0|0	0	0	0	0	0	-3	5	0.88
ZNF669	O75366	AVIL	1|1	2	1	2	0|0|0|0|0|0|0|0|0|0|0|0|0|0|0|0|0|0|0|0|0|0|0|0|0|0|0|0|0|0|0|0|0|0|0|0|0|0|0	0	0	0	0	0	-0.49	10	0.88
ZNF214	O75367	H2AFY	1|0	1	0.5	2	2|7|0|0|2|0|0|0|0|0|0|0|0|0|0|1|1|0|4|1|4|1|5|0|3|3|2|8|0|22|2|0|17|0|3|0|0|0|0	0	0	0	0	0	-34.1	0.07	0.88
IKZF3	O75367	H2AFY	3|6	9	4.5	2	2|7|0|0|2|0|0|0|0|0|0|0|0|0|0|1|1|0|4|1|4|1|5|0|3|3|2|8|0|22|2|0|17|0|3|0|0|0|0	0	0	0	0	0	-25.58	0.59	0.84
ZNF331	O75367	H2AFY	0|1	1	0.5	2	2|7|0|0|2|0|0|0|0|0|0|0|0|0|0|1|1|0|4|1|4|1|5|0|3|3|2|8|0|22|2|0|17|0|3|0|0|0|0	0	0	0	0	0	-34.1	0.07	0.88
ZNF250	O75367	H2AFY	7|5	12	6	2	2|7|0|0|2|0|0|0|0|0|0|0|0|0|0|1|1|0|4|1|4|1|5|0|3|3|2|8|0|22|2|0|17|0|3|0|0|0|0	0	0	0	0	0	-21.67	0.79	0.84
GLIS1	O75367	H2AFY	12|15	27	13.5	2	2|7|0|0|2|0|0|0|0|0|0|0|0|0|0|1|1|0|4|1|4|1|5|0|3|3|2|8|0|22|2|0|17|0|3|0|0|0|0	0	0	0	0	0	-11.77	1.78	0.75
ZNF596	O75367	H2AFY	10|15	25	12.5	2	2|7|0|0|2|0|0|0|0|0|0|0|0|0|0|1|1|0|4|1|4|1|5|0|3|3|2|8|0|22|2|0|17|0|3|0|0|0|0	0	0	0	0	0	-14.18	1.64	0.75
ZNF594	O75367	H2AFY	9|20	29	14.5	2	2|7|0|0|2|0|0|0|0|0|0|0|0|0|0|1|1|0|4|1|4|1|5|0|3|3|2|8|0|22|2|0|17|0|3|0|0|0|0	0	0.01	0	0.01	0	-15.52	1.91	0.67
ZNF595	O75367	H2AFY	3|4	7	3.5	2	2|7|0|0|2|0|0|0|0|0|0|0|0|0|0|1|1|0|4|1|4|1|5|0|3|3|2|8|0|22|2|0|17|0|3|0|0|0|0	0	0	0	0	0	-25.58	0.46	0.85
ZNF16	O75367	H2AFY	1|0	1	0.5	2	2|7|0|0|2|0|0|0|0|0|0|0|0|0|0|1|1|0|4|1|4|1|5|0|3|3|2|8|0|22|2|0|17|0|3|0|0|0|0	0	0	0	0	0	-34.1	0.07	0.88
ZNF71	O75367	H2AFY	10|13	23	11.5	2	2|7|0|0|2|0|0|0|0|0|0|0|0|0|0|1|1|0|4|1|4|1|5|0|3|3|2|8|0|22|2|0|17|0|3|0|0|0|0	0	0	0	0	0	-14.18	1.51	0.78
ZNF816	O75367	H2AFY	1|1	2	1	2	2|7|0|0|2|0|0|0|0|0|0|0|0|0|0|1|1|0|4|1|4|1|5|0|3|3|2|8|0|22|2|0|17|0|3|0|0|0|0	0	0	0	0	0	-30.67	0.13	0.88
ZSCAN5C	O75367	H2AFY	8|8	16	8	2	2|7|0|0|2|0|0|0|0|0|0|0|0|0|0|1|1|0|4|1|4|1|5|0|3|3|2|8|0|22|2|0|17|0|3|0|0|0|0	0	0	0	0	0	-16.95	1.05	0.83
ZNF320	O75367	H2AFY	1|8	9	4.5	2	2|7|0|0|2|0|0|0|0|0|0|0|0|0|0|1|1|0|4|1|4|1|5|0|3|3|2|8|0|22|2|0|17|0|3|0|0|0|0	0	0	0	0	0	-30.67	0.59	0.83
ZNF140	O75367	H2AFY	1|1	2	1	2	2|7|0|0|2|0|0|0|0|0|0|0|0|0|0|1|1|0|4|1|4|1|5|0|3|3|2|8|0|22|2|0|17|0|3|0|0|0|0	0	0	0	0	0	-30.67	0.13	0.88
ZNF708	O75367	H2AFY	12|13	25	12.5	2	2|7|0|0|2|0|0|0|0|0|0|0|0|0|0|1|1|0|4|1|4|1|5|0|3|3|2|8|0|22|2|0|17|0|3|0|0|0|0	0	0	0	0	0	-11.77	1.64	0.78
FEZF1	O75367	H2AFY	20|12	32	16	2	2|7|0|0|2|0|0|0|0|0|0|0|0|0|0|1|1|0|4|1|4|1|5|0|3|3|2|8|0|22|2|0|17|0|3|0|0|0|0	0	0.01	0	0.01	0	-11.77	2.11	0.67
ZBTB14	O75367	H2AFY	9|1	10	5	2	2|7|0|0|2|0|0|0|0|0|0|0|0|0|0|1|1|0|4|1|4|1|5|0|3|3|2|8|0|22|2|0|17|0|3|0|0|0|0	0	0	0	0	0	-30.67	0.66	0.82
ZNF18	O75367	H2AFY	0|1	1	0.5	2	2|7|0|0|2|0|0|0|0|0|0|0|0|0|0|1|1|0|4|1|4|1|5|0|3|3|2|8|0|22|2|0|17|0|3|0|0|0|0	0	0	0	0	0	-34.1	0.07	0.88
ZBTB42	O75367	H2AFY	5|4	9	4.5	2	2|7|0|0|2|0|0|0|0|0|0|0|0|0|0|1|1|0|4|1|4|1|5|0|3|3|2|8|0|22|2|0|17|0|3|0|0|0|0	0	0	0	0	0	-23.52	0.59	0.85
KLF7	O75367	H2AFY	6|17	23	11.5	2	2|7|0|0|2|0|0|0|0|0|0|0|0|0|0|1|1|0|4|1|4|1|5|0|3|3|2|8|0|22|2|0|17|0|3|0|0|0|0	0	0	0	0	0	-20	1.51	0.72
ZNF436	O75367	H2AFY	3|19	22	11	2	2|7|0|0|2|0|0|0|0|0|0|0|0|0|0|1|1|0|4|1|4|1|5|0|3|3|2|8|0|22|2|0|17|0|3|0|0|0|0	0	0	0	0	0	-25.58	1.45	0.69
ZNF768	O75367	H2AFY	12|12	24	12	2	2|7|0|0|2|0|0|0|0|0|0|0|0|0|0|1|1|0|4|1|4|1|5|0|3|3|2|8|0|22|2|0|17|0|3|0|0|0|0	0	0	0	0	0	-11.77	1.58	0.79
ZNF419	O75367	H2AFY	9|9	18	9	2	2|7|0|0|2|0|0|0|0|0|0|0|0|0|0|1|1|0|4|1|4|1|5|0|3|3|2|8|0|22|2|0|17|0|3|0|0|0|0	0	0	0	0	0	-15.52	1.18	0.82
ZNF418	O75367	H2AFY	0|3	3	1.5	2	2|7|0|0|2|0|0|0|0|0|0|0|0|0|0|1|1|0|4|1|4|1|5|0|3|3|2|8|0|22|2|0|17|0|3|0|0|0|0	0	0	0	0	0	-34.1	0.2	0.86
ZNF667	O75367	H2AFY	3|3	6	3	2	2|7|0|0|2|0|0|0|0|0|0|0|0|0|0|1|1|0|4|1|4|1|5|0|3|3|2|8|0|22|2|0|17|0|3|0|0|0|0	0	0	0	0	0	-25.58	0.39	0.85
ZNF184	O75367	H2AFY	0|3	3	1.5	2	2|7|0|0|2|0|0|0|0|0|0|0|0|0|0|1|1|0|4|1|4|1|5|0|3|3|2|8|0|22|2|0|17|0|3|0|0|0|0	0	0	0	0	0	-34.1	0.2	0.86
ZFP28	O75367	H2AFY	1|2	3	1.5	2	2|7|0|0|2|0|0|0|0|0|0|0|0|0|0|1|1|0|4|1|4|1|5|0|3|3|2|8|0|22|2|0|17|0|3|0|0|0|0	0	0	0	0	0	-30.67	0.2	0.88
KLF1	O75367	H2AFY	10|10	20	10	2	2|7|0|0|2|0|0|0|0|0|0|0|0|0|0|1|1|0|4|1|4|1|5|0|3|3|2|8|0|22|2|0|17|0|3|0|0|0|0	0	0	0	0	0	-14.18	1.32	0.81
ZNF322	O75367	H2AFY	6|12	18	9	2	2|7|0|0|2|0|0|0|0|0|0|0|0|0|0|1|1|0|4|1|4|1|5|0|3|3|2|8|0|22|2|0|17|0|3|0|0|0|0	0	0	0	0	0	-20	1.18	0.79
ZNF189	O75367	H2AFY	6|9	15	7.5	2	2|7|0|0|2|0|0|0|0|0|0|0|0|0|0|1|1|0|4|1|4|1|5|0|3|3|2|8|0|22|2|0|17|0|3|0|0|0|0	0	0	0	0	0	-20	0.99	0.82
OSR2	O75367	H2AFY	6|10	16	8	2	2|7|0|0|2|0|0|0|0|0|0|0|0|0|0|1|1|0|4|1|4|1|5|0|3|3|2|8|0|22|2|0|17|0|3|0|0|0|0	0	0	0	0	0	-20	1.05	0.81
ZNF582	O75367	H2AFY	0|1	1	0.5	2	2|7|0|0|2|0|0|0|0|0|0|0|0|0|0|1|1|0|4|1|4|1|5|0|3|3|2|8|0|22|2|0|17|0|3|0|0|0|0	0	0	0	0	0	-34.1	0.07	0.88
MYNN	O75367	H2AFY	8|8	16	8	2	2|7|0|0|2|0|0|0|0|0|0|0|0|0|0|1|1|0|4|1|4|1|5|0|3|3|2|8|0|22|2|0|17|0|3|0|0|0|0	0	0	0	0	0	-16.95	1.05	0.83
ZFP82	O75367	H2AFY	10|10	20	10	2	2|7|0|0|2|0|0|0|0|0|0|0|0|0|0|1|1|0|4|1|4|1|5|0|3|3|2|8|0|22|2|0|17|0|3|0|0|0|0	0	0	0	0	0	-14.18	1.32	0.81
PATZ1	O75367	H2AFY	13|12	25	12.5	2	2|7|0|0|2|0|0|0|0|0|0|0|0|0|0|1|1|0|4|1|4|1|5|0|3|3|2|8|0|22|2|0|17|0|3|0|0|0|0	0	0	0	0	0	-11.77	1.64	0.78
ZNF394	O75367	H2AFY	1|1	2	1	2	2|7|0|0|2|0|0|0|0|0|0|0|0|0|0|1|1|0|4|1|4|1|5|0|3|3|2|8|0|22|2|0|17|0|3|0|0|0|0	0	0	0	0	0	-30.67	0.13	0.88
[truncated: 65,640 more rows]

## Sheet: CRAPome+SAINTexpress Settings
#SAINTexpress settings in CRAPome 1.1 Workflow 3 (www.crapome.org): FC-A(user,default); FC-B(all,stringent) (SE)C(all);IKD=none;NR=all
#CRAPome negative control sets:
ID	Name	Comments
174	CC174	CRISTEA_2011_04_293_EGFP_Harsh_YVM
180	CC180	CRISTEA_2011_01_293FlpIn_EGFP_TL_B
175	CC175	CRISTEA_2011_04_293_EGFP_AJG
167	CC167	CRISTEA_2011_07_293_EGFP_BAD_02|CRISTEA_2011_07_293_EGFP_BAD_01
173	CC173	CRISTEA_2011_04_293_EGFP_IYZ
158	CC158	CRISTEA_2011_11_293_EGFP_JAF
179	CC179	CRISTEA_2011_02_293FlpIn_EGFP_TL
177	CC177	CRISTEA_2011_03_293_EGFP_YVM
182	CC182	CRISTEA_2011_01_293_EGFP_YCT_02
183	CC183	CRISTEA_2011_01_293_EGFP_YCT_01
