# Supplementary material for: Multiparameter functional diversity of human C2H2 zinc finger proteins
Source: Genome Res. 2016 Dec;26(12):1742–52. doi: 10.1101/gr.209643.116 (PMC5131825; doi:10.1101/gr.209643.116)
Supplement: Supplemental Material [file supp_gr.209643.116_Supplemental_Table_S8.xlsx]

## Sheet: Legend
Supplemental Table S8 (related to Figure 5): Data underlying the protein-protein interaction heatmap. Matrices of numerical data for fold change spectral count and AvgP for 118 baits x 227 nuclear preys used to produce Figure 5 and Supplemental Figure S2.

## Sheet: Figure3A_normSPC
	TRIM28	DIMT1	CSNK1E	RAD18	ZNF467	ZNF669	LANCL1	Q96T88	ZNF460	RIPK4	ZNF546	LENG8	ZNF768	ZNF724P	SQSTM1	DDX20	TEX10	COIL	ZNF225	CCDC6	GRB2	PRKCA	CAMK2G	CAMK2D	CAMK2B	SCML1	HUWE1	CENPB	TP53BP1	MYH6	MIB1	PCM1	PSMD3	PSMC3	PSMC5	GLYR1	PPP2CA	NDUFS3	NUP160	NUP205	IQGAP2	MRPS31	MRPS9	DAP3	TRIM27	MRPS23	KRI1	KRR1	PAK1IP1
ZNF264_KRAB-A	3.37938	3.68779	0.987821	1	0.975934	1	0.925804	0.984465	0.757248	0.839553	1	0.857302	0.90514	0.885378	0.910219	0.975934	0.941932	1.9246	1	1	0.875817	0.981841	0.981841	0.936493	0.958631	0.852795	0.528011	0.771658	0.875817	1	0.981841	0.936493	0.710793	0.595901	0.814267	0.984465	0.317307	0.742975	0.557022	0.900117	0.993873	0.952999	0.925804	0.981841	0.89515	0.970098	0.947433	0.852795	0.987821
ZNF692_NONE	17.0909	0.932809	3.951	27.971	9.01913	1	0.974648	0.914043	0.90576	0.941596	1	0.948746	0.967104	0.959676	0.968979	0.99206	0.980384	0.974648	1	1	0.956005	0.994033	0.994033	0.978464	0.986187	2.22396	0.775118	0.912374	0.956005	1	0.994033	0.978464	1.35984	0.819608	0.931071	0.914043	0.588824	0.812942	0.794842	0.965236	0.998003	0.984245	0.974648	0.994033	0.963376	0.990095	0.982311	0.946948	0.996014
ZNF502_NONE	24.815	0.910372	0.99456	1	0.989179	5.31537	0.965669	3.27602	0.875497	0.921848	1	0.931238	0.955574	0.945689	0.958078	0.989179	0.97338	0.965669	1	1	0.940822	0.991862	0.991862	0.970796	0.981216	2.93309	0.716054	0.883963	0.940822	1	0.991862	0.970796	0.847102	0.768743	0.908111	0.886105	0.511657	0.760746	0.739215	0.953084	0.997273	0.97859	0.965669	0.991862	0.950606	0.986511	0.975978	0.928873	0.99456
ZNF175_KRAB-A	11.4302	0.911064	0.994606	1	0.98927	1	0.96595	1.36541	1.1128	0.922459	1	0.931781	0.955934	0.946124	0.958418	0.98927	0.9736	0.96595	1	1	0.941295	0.991931	0.991931	0.971036	0.981372	0.929433	0.717782	1.36213	0.941295	1	0.991931	0.971036	1.07697	0.770252	0.908819	0.886961	0.513783	0.762292	0.940668	0.953463	1.26628	0.978768	0.96595	0.991931	0.951004	0.986623	0.976177	0.929433	0.994606
ZNF324_KRAB-A	72.0353	0.979835	0.998858	1	0.997719	1	0.992623	0.973834	0.971131	1.2476	1	0.984799	0.990375	0.988137	0.990936	0.997719	0.994316	0.992623	1	1	0.987022	0.998288	0.998288	0.993751	0.996014	0.984245	0.923452	0.973292	0.987022	1	0.998288	0.993751	0.963641	0.940836	0.979286	0.973834	0.83367	0.938313	0.931319	0.989815	0.999429	0.995447	0.992623	0.998288	0.989255	0.99715	0.994881	0.984245	0.998858
ZNF33A_KRAB-A	19.2739	0.942343	0.996612	1	0.993248	1	0.978383	0.926029	2.65347	0.94995	1	0.956125	0.971919	0.965539	0.973527	0.993248	0.983288	0.978383	1	1	0.96238	0.994927	0.994927	0.981648	0.988243	3.01424	0.802286	1.17394	0.96238	1	0.994927	0.981648	0.899141	0.842493	0.940836	0.926029	0.627686	0.836504	0.820179	0.970316	0.998303	0.986586	0.978383	0.994927	0.968718	0.991574	0.984934	0.954574	0.996612
ZNF582_KRAB-A	45.0266	0.890531	0.993217	1	0.986526	1	0.957497	0.861708	1.07826	0.90428	1	0.915588	1.20005	0.933091	0.948197	0.986526	0.966981	0.957497	1	1	0.927183	0.98986	0.98986	0.963799	0.976656	0.912734	0.849238	1.32264	0.927183	1	0.98986	0.963799	0.816084	0.726952	0.887831	0.861708	0.456268	0.71804	0.694211	0.942096	0.996597	0.97341	0.957497	0.98986	0.939075	0.983214	0.970185	0.912734	0.993217
ZNF354A_KRAB-A	39.1048	0.943084	0.996658	1	0.993339	1	0.978672	0.926964	0.919817	1.97614	1	0.956697	0.972291	0.965993	0.973878	0.993339	0.983512	0.978672	1	1	0.962874	0.994996	0.994996	0.981893	0.988401	0.955165	0.804455	0.925526	0.962874	1	0.994996	0.981893	0.90038	0.844307	0.941596	0.926964	0.63089	0.838373	0.822196	0.970709	0.998326	0.986766	0.978672	0.994996	0.969132	0.991688	0.985137	0.955165	0.996658
ZNF554_KRAB-A	30.8454	0.89252	0.993354	1	0.986796	1	0.958326	0.864141	1.77082	2.1279	1	0.917164	0.946194	0.934364	0.949198	0.986796	0.967632	0.958326	1	1	0.92856	0.990064	0.990064	0.96451	0.97712	0.914359	3.03443	0.86165	0.92856	1	0.990064	0.96451	0.819152	0.731016	0.889864	0.864141	0.461376	0.722187	0.698561	0.943208	0.996666	0.973937	0.958326	0.990064	0.940242	0.98355	0.970774	0.914359	0.993354
ZNF350_KRAB-A	64.3086	0.913843	0.99479	1	0.989633	1	3.31455	0.890402	1.35491	0.924911	1	0.93396	0.957376	0.94787	0.959783	0.989633	0.974479	0.967075	1	1	0.943188	0.992205	0.992205	0.971999	0.981998	0.931681	1.11573	2.08629	0.943188	1	0.992205	0.971999	0.852626	0.77635	0.911661	0.890402	0.522468	0.768538	0.747475	0.954982	0.997388	0.979479	0.967075	0.992205	0.9526	0.987075	0.976973	0.931681	0.99479
ZNF382_KRAB-A	21.9556	0.88877	0.993095	1	0.986285	1	0.956761	1.32322	1.53216	0.902716	1	0.914191	1.45352	0.931963	0.947308	0.986285	0.966404	0.956761	1	1	0.925963	0.989678	0.989678	0.963168	0.976243	1.89444	1.20282	1.55042	0.925963	1	0.989678	0.963168	0.813377	0.723377	0.886032	0.859556	0.451821	0.714395	1.24901	1.44876	0.996536	0.972941	0.956761	0.989678	0.938041	0.982915	0.969662	0.911295	0.993095
ZNF8_KRAB-A	62.8011	0.89031	0.993202	1	0.986496	1	0.957405	6.66991	1.30685	0.904084	1	0.915413	0.945019	0.93295	0.948085	0.986496	0.966909	0.957405	1	1	0.92703	0.989837	0.989837	0.96372	0.976604	0.912554	0.668343	0.858906	0.92703	1	0.989837	0.96372	0.815745	0.726503	0.887606	0.861438	0.455707	0.717583	0.880838	0.941973	0.996589	0.973351	0.957405	0.989837	0.938946	0.983176	0.970119	0.912554	0.993202
ZNF45_KRAB-A	18.04	0.88987	0.993171	1	0.986435	1	0.957221	3.64722	1.07715	0.903692	1	0.915064	0.944785	0.932668	0.947863	0.986435	0.966765	0.957221	1	1	0.926725	0.989792	0.989792	0.963562	0.976501	2.63439	0.667344	1.08987	0.926725	1	0.989792	0.963562	0.815067	0.725607	0.887156	0.8609	0.45459	0.716669	0.879622	0.941726	0.996574	0.973234	0.957221	0.989792	1.19186	0.983102	0.969989	0.912194	0.993171
ZNF454_KRAB-A	29.2318	0.875355	0.992151	1	0.984425	1	0.951095	3.57241	1.94791	0.890776	3.6971	0.90351	0.936995	1.17233	0.940481	0.984425	0.961951	0.951095	1	1	0.916612	0.988273	0.988273	0.958305	0.973058	4.05693	0.635514	1.06711	0.916612	1	0.988273	1.21677	0.792987	0.69682	0.872335	0.843239	0.420093	0.687347	0.662145	0.933535	0.99606	0.969328	0.951095	0.988273	0.930101	0.980607	0.965625	0.900292	0.992151
ZNF30_KRAB-A	21.2374	0.899441	0.993827	1	0.98773	1	0.961194	2.99084	4.34412	0.912181	1	0.922636	2.48696	1.95157	1.20961	0.98773	0.96988	0.961194	1	1	0.933333	0.990769	0.990769	0.966967	0.978723	4.39387	0.689508	2.04388	0.933333	1	0.990769	0.966967	0.829897	0.946405	0.896936	0.872629	0.479881	0.736842	0.713969	0.947059	0.996904	0.975758	0.961194	0.990769	1.45365	0.984709	0.97281	0.92	0.993827
ZNF669_KRAB-A	82.8267	0.906699	0.994316	1	0.988696	1	0.964172	8.7279	10.7326	0.918603	1	0.928353	0.953659	0.943373	0.956266	0.988696	0.972211	0.964172	1	1	0.938313	0.991498	0.991498	0.969516	0.980384	2.67396	0.706981	0.879351	0.938313	1	0.991498	0.969516	1.522	0.760791	0.904355	0.881567	0.500607	0.752608	0.927655	0.951067	0.99715	0.977644	0.964172	0.991498	1.20431	0.985909	0.97492	0.925896	0.994316
ZNF37A_KRAB-A	24.9605	0.915238	0.994881	1	0.989815	1	0.967639	0.892133	3.49878	0.926141	1	0.935053	0.958099	1.46052	0.960467	0.989815	0.97492	0.967639	1	1	0.944137	0.992341	0.992341	0.972481	0.982311	0.932809	0.728322	0.89009	0.944137	1	0.992341	0.972481	0.854856	0.779436	0.913089	0.892133	0.526921	0.771699	0.750831	0.955744	0.997434	0.979835	0.967639	0.992341	0.953399	0.987301	0.977371	0.932809	0.994881
ZNF121_NONE	4.30242	0.866287	0.991498	1	0.983139	1	0.947204	4.19941	1.69985	0.882679	1	4.0387	3.94871	2.89685	1.69299	0.983139	1.21751	0.947204	1	1	0.910238	0.987301	0.987301	0.954961	0.970862	3.30083	0.616638	2.39506	0.910238	1	0.987301	0.954961	0.779436	1.22934	0.863081	0.832282	0.400583	0.850402	0.817535	0.928353	0.995731	0.966837	0.947204	0.987301	0.924673	0.979012	0.962846	0.892816	0.991498
ZIM3_KRAB-A	122.78	0.924415	0.995478	1	0.990997	1	0.971321	1.14724	0.89437	1.18619	1	0.94222	0.962824	0.954475	0.964934	0.990997	0.977792	0.971321	1	1	0.950355	0.993232	0.993232	0.975625	0.98435	0.940207	0.752258	1.87449	0.950355	1	0.993232	0.975625	0.869639	0.800104	0.922478	0.903547	0.557828	0.792899	0.7734	0.960723	0.997734	0.982154	0.971321	0.993232	0.958631	0.988771	0.979968	0.940207	0.995478
ZNF146_NONE	1.82287	0.778676	0.984455	1	0.969386	1	0.906915	1.71292	0.70894	1.88676	1	0.824285	1.35725	0.857779	6.87436	0.969386	1.67675	0.906915	1	1	0.846316	0.976862	0.976862	0.920092	0.947627	1.03984	3.23273	0.725177	0.846316	1	0.976862	0.920092	1.18937	2.55605	2.86126	1.51621	1.05628	1.79637	1.0299	0.875568	0.992167	0.94059	0.906915	0.976862	0.869557	0.962023	0.933656	0.818955	0.984455
ZNF563_KRAB-A	10.6954	0.811541	0.987263	1	0.974846	1	1.17147	0.767353	1.35471	1.05812	1	0.851667	0.901176	0.880697	0.906445	5.18167	1.19277	0.92263	1	1	0.870803	0.981015	0.981015	0.933744	0.956796	5.18753	1.49223	1.17546	2.74972	1	0.981015	0.933744	0.701388	0.584941	0.807315	0.767353	0.307571	0.728954	2.90119	0.895967	0.993591	0.950927	0.92263	0.981015	1.85187	0.968754	0.94513	1.07546	0.987263
ZNF224_KRAB-A	6.91622	0.801233	0.986405	1	0.973175	1	0.917782	1.774	1.13332	1.49069	1	0.84313	0.895137	0.873583	0.900693	0.973175	4.21573	3.1456	3.42739	1	0.86319	0.979746	0.979746	0.92954	0.953983	9.42958	3.46821	1.56214	1.56162	1	0.979746	0.92954	0.687377	1.79617	1.65649	0.959085	1.16501	2.21305	2.81394	0.88965	0.993156	0.947752	0.917782	0.979746	2.55363	0.966693	0.941603	0.838259	0.986405
ZNF419_KRAB-A	23.9365	0.7872	0.985204	1	0.97084	1	0.911064	1.93526	2.46492	0.811175	1	0.831432	0.886797	0.863789	0.892742	0.97084	0.930154	0.911064	1	1	0.852727	0.977969	0.977969	0.923703	0.950062	4.83766	1.64084	1.72633	0.852727	1	0.977969	0.923703	0.66863	0.843059	0.782574	0.739139	0.946623	0.536613	0.507958	0.880931	0.992547	0.943332	0.911064	0.977969	2.29135	0.963813	0.936697	0.826274	0.985204
ZNF331_KRAB-A	32.5423	0.836461	0.989255	1	0.978738	1	0.934054	2.30071	0.779783	0.855902	1	0.872117	0.915478	0.897626	0.920052	0.978738	0.948488	1.4379	1	3.42739	5.20467	4.69938	0.983968	0.943628	0.963376	0.868006	2.37011	3.57444	0.888959	1	0.983968	0.943628	0.736138	0.626017	0.832678	0.796652	0.345377	2.10974	1.38102	1.15664	0.994598	0.958362	0.934054	0.983968	1.39543	0.973563	0.953399	0.868006	0.989255
ZNF677_KRAB-A	6.18487	0.838021	0.989376	1	0.978975	1	0.934755	0.7985	1.83596	2.70711	1	0.873388	0.916359	0.898673	0.92089	0.978975	0.949045	0.934755	1	1	0.890084	0.984148	12.6633	17.4978	11.8813	7.1998	8.1447	3.15398	4.49106	1	0.984148	0.944233	0.738355	0.628693	0.834267	0.7985	0.347969	0.618258	0.909492	0.911873	0.99466	0.958816	0.934755	0.984148	0.90743	0.973856	0.953905	0.869312	0.989376
ZNF273_KRAB-A	2.32391	0.797678	0.986105	1	0.97259	1	0.916093	1.96693	4.28493	0.820741	1	0.840175	0.893038	0.871114	0.898692	0.97259	1.94202	0.916093	1	1	1.55685	0.979301	0.979301	0.928074	0.952999	4.21429	2.7627	5.98757	10.3766	6.93363	0.979301	7.68647	4.73284	2.23482	1.2211	0.751236	0.756967	0.552415	0.52387	0.887454	0.993004	0.946643	0.916093	0.979301	0.881939	0.965971	0.940371	0.83523	0.986105
ZNF528_KRAB-A	7.05246	1.12155	0.992714	1	0.985534	1	0.954468	0.852901	0.83976	0.897863	1	0.909854	0.941281	0.928453	0.944543	0.985534	0.964603	0.954468	1	1	0.922169	0.989111	0.989111	0.961201	0.974957	4.08637	0.652706	0.85024	2.16576	1	4.99072	10.2941	3.62766	2.24962	1.59286	0.852901	0.438468	0.703236	0.678716	1.19104	1.80252	0.971481	0.954468	0.989111	0.934823	0.981983	0.96803	0.906826	0.992714
ZBTB12_BTB	0.416556	0.842537	0.989724	1	0.979657	1	0.936778	0.80386	0.78743	0.861375	1	0.877063	0.918903	0.901697	0.923307	0.979657	0.950648	0.936778	1	1	0.893333	0.984665	0.984665	0.945979	0.964934	0.873088	1.03216	0.80052	0.893333	1	0.984665	0.945979	6.36949	5.10005	7.62641	2.32153	0.355643	0.795052	0.598912	1.40786	0.994835	0.960125	0.936778	0.984665	0.910219	0.9747	0.955363	0.873088	0.989724
ZNF16_NONE	0.911195	0.843921	0.98983	1	0.979864	1	0.937395	2.32628	1.00203	0.862621	1	1.3519	2.15992	0.902621	0.924046	0.979864	0.951137	1.69587	1	1	1.13554	0.984822	0.984822	0.946512	0.965287	1.58162	2.27336	4.04756	0.894327	1	0.984822	2.22293	0.74679	0.983587	0.840278	0.805506	0.551184	0.628616	0.763635	0.915355	0.994889	5.10554	5.23543	5.76592	1.40252	3.86747	1.47139	0.874244	0.98983
ZNF22_NONE	0.314189	2.64374	0.989315	1	0.978857	1	0.934405	0.797575	0.780762	0.856604	1	2.28509	0.915918	0.89815	0.920471	0.978857	0.948766	1.18642	1	1	0.889521	0.984058	0.984058	0.94393	0.963577	0.868658	0.560852	1.43673	0.889521	1	0.984058	0.94393	0.737245	1.98098	0.833472	0.797575	7.73316	5.1093	5.99443	7.54847	7.43291	3.80254	3.70661	8.15015	1.15156	5.70086	1.72528	1.8058	0.989315
ZNF684_KRAB-A	0.370916	0.874291	0.992075	1	0.984275	1	0.950641	1.06903	0.828028	0.889827	1	0.902659	0.936419	0.922616	0.939934	0.984275	0.961594	0.950641	1	1	0.915867	0.98816	0.98816	0.957915	0.972802	0.899416	0.63326	0.839129	0.915867	1	0.98816	1.21627	0.791387	0.694763	0.871249	2.20445	0.530392	0.685255	0.659967	0.93293	0.996022	16.1279	20.4369	21.2435	14.9679	9.7066	6.69304	5.99364	5.80839
ZSCAN22_SCAN	3.62288	1.10687	0.991893	1	0.983916	1	0.949553	1.06513	1.49206	0.887557	1	0.900624	0.935039	0.920962	0.938626	0.983916	1.47898	0.949553	1	1	0.914082	0.987888	0.987888	0.95698	0.972189	1.86539	12.6521	0.836007	0.914082	1	0.987888	0.95698	3.97383	4.78334	3.2115	5.13768	0.412157	1.59769	1.00801	1.18271	0.99593	0.968341	0.949553	0.987888	0.927947	0.979976	1.22467	1.62337	2.86456
SNAI1_SNAG	0.328056	0.830089	0.988756	1	0.977762	1	0.931171	0.78912	0.771805	0.850151	1	0.866913	0.91186	0.893333	0.916612	0.977762	0.9462	0.931171	1	1	0.88435	0.983229	0.983229	0.941137	0.961723	0.862661	0.548111	0.785595	0.88435	1	0.983229	0.941137	0.727132	0.615217	0.826189	1.21479	0.33508	0.604641	0.576876	0.907157	0.994346	0.956492	0.931171	0.983229	0.902502	0.972357	1.2079	1.328	0.988756
ZNF213_KRAB-A;SCAN	0.690053	0.842537	0.989724	1	0.979657	1	0.936778	0.80386	0.78743	0.861375	1	0.877063	0.918903	0.901697	0.923307	0.979657	0.950648	0.936778	1	1	0.893333	0.984665	0.984665	0.945979	0.964934	0.873088	0.57053	0.80052	0.893333	1	0.984665	0.945979	0.744804	0.636514	0.838868	1.6711	1.50669	0.626168	0.598912	0.91454	0.994835	0.960125	0.936778	0.984665	0.910219	0.9747	0.955363	0.873088	0.989724
ZNF675_KRAB-A	0.878415	0.838411	0.989406	1	0.979034	1	0.934931	1.22994	0.782234	0.85766	1	1.345	1.90542	1.14139	0.9211	0.979034	1.9732	1.94357	1	1	0.890365	0.984193	0.984193	0.944385	0.963878	0.869639	0.714814	0.79556	0.890365	1	0.984193	0.944385	0.738912	1.1386	0.834665	1.87641	0.912786	1.62054	0.910564	0.912104	0.994675	0.95893	0.934931	0.984193	0.907672	0.97393	1.21134	1.10419	0.989406
ZNF449_SCAN	0.691482	0.829897	0.988741	1	0.977733	1	0.931084	0.788893	0.771566	1.30847	1	0.866756	0.911751	0.893204	0.916509	0.977733	0.946131	0.931084	1	1	0.884211	0.983206	0.983206	0.941062	0.961672	0.8625	6.45739	0.997187	0.884211	1	0.983206	0.941062	0.922905	0.780739	0.825994	0.788893	0.334777	0.604317	0.576544	0.907042	0.994339	0.956436	0.931084	0.983206	0.902382	0.97232	0.951256	0.8625	0.988741
ZSCAN16_SCAN	0.551496	0.799096	0.986225	1	0.972824	1	0.916768	0.752879	0.733593	0.822034	1	0.841354	0.893876	0.8721	0.899491	0.972824	0.934722	0.916768	1	1	0.861604	0.979479	0.979479	0.92866	0.953392	0.836439	3.44505	0.748941	0.861604	1	0.979479	0.92866	1.42296	1.63328	0.794662	0.752879	0.290925	0.704171	0.526067	0.888331	0.993065	0.947087	0.916768	0.979479	0.882854	0.96626	0.940864	0.836439	0.986225
ZSCAN30_SCAN	1.29942	0.775151	0.984141	1	0.968776	1	0.905184	1.3122	0.704726	0.800139	1	0.821319	0.879524	0.85528	0.885802	0.968776	0.925433	0.905184	1	1	0.843652	0.976398	0.976398	0.918583	0.946609	0.81592	0.461182	0.721104	0.843652	1	0.976398	0.918583	0.652828	0.816094	0.77034	0.725319	1.11134	0.519045	1.01933	0.873335	0.992007	0.939443	0.905184	0.976398	0.867233	0.961273	0.932385	0.81592	0.984141
ZNF18_KRAB-A;SCAN	1.20271	0.885705	0.992882	1	0.985864	1	0.955476	9.16544	0.842888	0.899992	1	0.911757	0.942563	0.929994	0.945758	0.985864	0.965395	0.955476	1	1	0.923835	0.989361	0.989361	0.962066	0.975522	1.88922	0.657998	0.853199	0.923835	1	0.989361	0.962066	1.02679	0.717205	1.35916	0.855817	0.444245	0.708103	0.868233	0.939389	0.996428	0.972123	0.955476	0.989361	0.936236	0.982393	0.968747	0.908787	0.992882
MZF1_SCAN	4.95387	0.862546	0.991224	1	0.982602	1	0.945585	1.94408	2.34759	0.879333	1	0.893241	2.43502	0.914947	0.933859	0.982602	0.95761	0.945585	1	1	0.907596	0.986894	0.986894	0.953568	0.969945	3.04943	0.609065	0.824757	1.39717	1	0.986894	0.953568	0.7739	0.672527	0.859265	0.827779	0.392944	0.662663	0.636523	0.926201	0.995593	0.965798	0.945585	0.986894	0.922419	0.978346	0.961687	0.889723	0.991224
ZNF263_KRAB-A;SCAN	1.24788	0.882011	0.992623	1	0.985354	1	0.953919	0.85132	0.838064	0.896706	1	0.908819	0.940583	0.927615	0.943882	0.985354	0.964172	0.953919	1	1	0.921264	0.988975	0.988975	0.96073	0.974648	0.90576	0.649855	0.848635	0.921264	1	0.988975	0.96073	0.803052	0.70985	0.87913	1.31054	0.43538	0.70061	0.675973	0.937307	0.996298	0.971131	0.953919	0.988975	0.934054	0.981759	0.967639	0.90576	0.992623
ZNF189_KRAB-A	1.38358	0.783939	0.984919	1	0.970287	1	0.909483	3.31384	0.715255	0.808192	1	0.828702	0.884839	1.55856	1.37143	0.970287	1.17942	0.909483	1	1	0.85028	0.977548	0.977548	0.922327	0.949135	2.60028	1.36865	1.12574	0.85028	1	0.977548	0.922327	0.664326	0.982081	1.40979	0.933732	0.27234	0.675227	0.638816	0.878885	0.992402	0.942288	1.15478	0.977548	1.34393	0.963132	0.935539	1.26768	0.984919
ZSCAN5C_SCAN	0.585914	0.781893	0.984739	1	0.969938	1	0.908487	0.733041	0.712797	0.806319	1	0.826986	0.883607	0.860053	0.889698	0.969938	0.928087	0.908487	1	1	0.848741	0.977283	0.977283	0.92146	0.948551	0.821721	0.470913	0.728901	0.848741	1	0.977283	0.92146	0.840088	0.539858	0.777185	1.52388	1.21651	0.956666	0.50011	0.877598	0.992311	0.94163	0.908487	0.977283	0.871671	0.962702	0.934809	0.821721	0.984739
MYNN_BTB	0.64316	0.824947	0.988348	1	0.976965	1	0.928826	0.783062	0.765397	0.845503	1	0.862701	0.908921	0.889851	0.913817	0.976965	0.944337	0.928826	1	1	0.880613	0.982624	0.982624	0.939109	0.960374	0.858336	0.830014	0.779464	0.880613	1	0.982624	0.939109	0.719925	0.606653	0.820955	0.783062	0.327101	0.595997	0.568058	0.904077	0.99414	0.954968	0.928826	0.982624	0.899285	0.971372	0.949623	0.858336	0.988348
SP2_NONE	0.20197	0.841157	0.989618	1	0.979449	1	0.936162	0.802221	0.78569	1.09212	1	0.875941	0.918127	0.900775	0.92257	0.979449	0.950159	0.936162	1	1	0.892342	0.984507	0.984507	0.945447	0.964582	0.871935	0.567989	0.79886	0.892342	1	0.984507	0.945447	0.74283	0.634113	0.837462	0.802221	0.353272	0.623739	1.079	0.913727	0.994782	0.959726	0.936162	0.984507	0.909368	0.974443	0.954919	0.871935	0.989618
ZNF76_NONE	0.699857	1.39843	0.983946	1	1.75196	1	0.904115	0.722844	0.702142	0.79815	1	0.819494	0.878206	0.85374	0.884543	0.968399	0.924574	0.904115	1	1	0.842011	0.976111	0.976111	0.917652	0.945979	0.814052	0.458105	0.718606	0.842011	1	0.976111	0.917652	0.650015	0.527044	0.768141	0.917803	1.24143	0.515952	0.48724	1.34231	0.991908	0.938735	0.904115	0.976111	0.8658	0.960809	0.9316	0.814052	0.983946
ZNF768_NONE	1.50165	3.11517	0.985039	1	0.970519	1	0.910148	3.12217	0.716903	0.809445	1	1.94894	0.885663	0.86246	0.89166	1.23228	2.68414	0.910148	1	1	1.31052	1.24143	0.977725	2.16749	0.949525	8.83168	3.17159	0.732862	0.851308	1	0.977725	0.922906	0.845794	0.985719	1.20175	1.7308	1.53003	2.11754	2.2763	1.11702	0.992463	1.19699	1.89205	2.03254	4.64514	3.04217	1.44094	0.824652	0.985039
ZFP82_KRAB-A	8.75621	1.63325	0.985069	1	0.970578	1	0.910315	2.52722	1.49119	0.809759	1	0.830136	1.84158	1.56074	0.891856	0.970578	1.68168	1.15584	1	1	0.851566	0.97777	1.24148	1.42096	0.949623	5.71987	11.5276	1.52433	0.851566	1	0.97777	1.66992	1.74529	2.16335	2.88744	2.12947	0.644336	1.97544	1.5967	0.879961	0.992478	0.942837	1.15584	0.97777	0.874131	1.22335	0.936148	1.04744	0.985069
ZBTB26_BTB	0.197682	1.0358	0.987609	1	0.975522	1	0.9246	0.772302	0.754037	0.837197	1	0.855161	0.903636	0.883601	0.908787	0.975522	0.940973	0.9246	1	1	1.10962	0.981529	0.981529	0.935451	0.957936	0.850598	9.98679	0.768579	0.873913	1	0.981529	0.935451	1.47017	1.54924	1.03053	0.772302	1.2438	0.580925	0.850878	1.14089	0.993766	0.952214	0.9246	0.981529	0.893506	0.969589	0.94656	0.850598	0.987609
KLF7_NONE	1.11289	2.65503	0.984096	1	0.968689	1	0.904937	0.724746	0.704128	0.799679	1	0.820897	0.87922	0.854924	0.885511	0.968689	0.925234	0.904937	1	1	0.843272	0.976332	0.976332	0.918368	0.946463	0.815488	4.43465	0.720526	0.843272	1	0.976332	0.918368	0.652177	0.529415	0.977463	1.89758	0.261769	0.658126	0.489617	0.873017	0.991984	0.93928	0.904937	0.976332	0.866902	0.961165	0.932204	0.815488	0.984096
ZNF436_KRAB-A	1.61405	1.37044	0.982527	1	0.965654	1	0.896383	0.895475	0.683818	0.783915	1	0.806399	0.868688	0.842652	0.87545	0.965654	1.41372	1.13815	1	1	0.830211	0.974017	0.974017	1.15658	0.941404	0.800658	0.436811	0.700864	0.830211	1	0.974017	0.910904	0.630174	0.641882	0.955388	1.08569	0.243708	0.627772	1.09385	1.09453	0.991186	0.933589	0.896383	0.974017	1.0862	0.957433	0.925903	1.0166	0.982527
ZNF524_NONE	0.641647	0.824568	0.988318	1	0.976906	1	2.18099	0.782617	0.764927	1.07311	1	0.862391	1.39888	0.889594	0.913611	0.976906	0.944199	0.928653	1	1	1.11777	0.982579	0.982579	0.938959	0.960274	0.858018	0.974257	1.19923	0.880338	1	0.982579	0.938959	0.719397	0.769481	0.820569	1.41586	0.326525	0.91652	1.63868	0.90385	0.994125	0.954855	0.928653	0.982579	0.899048	0.971299	0.949497	0.858018	0.988318
PATZ1_BTB	0.496256	0.80428	0.986661	1	0.973673	1	0.919223	1.16826	0.739917	0.826754	1	0.845658	0.89693	0.875693	0.902401	0.973673	0.936683	0.919223	1	1	0.865447	0.980124	0.980124	0.93079	0.95482	0.840851	0.505011	0.755022	0.865447	1	0.980124	0.93079	0.691497	0.573538	0.799931	0.758895	0.297696	1.16962	0.966417	0.891524	0.993286	0.948697	0.919223	0.980124	0.886184	0.967307	0.942652	0.840851	0.986661
GTF3A_NONE	0.29442	0.798387	0.986165	1	0.972707	1	0.916431	0.752057	0.73273	0.821387	1	0.840764	0.893457	0.871606	0.899092	0.972707	0.934452	0.916431	1	1	1.09332	0.97939	0.97939	0.928367	0.953196	1.2867	1.0306	1.35343	0.861077	1	0.97939	0.928367	0.683544	0.7167	1.00807	1.36057	1.15043	1.15064	2.50721	0.887892	0.993034	0.946865	0.916431	1.50769	0.882396	0.966115	0.940617	0.835834	0.986165
ZBTB6_BTB	1.23811	0.927515	0.995677	1	0.991391	1	0.972554	1.15216	0.898567	0.936948	1	0.944633	0.964409	0.9564	0.966433	0.991391	0.978753	0.972554	1	1	0.952445	0.99353	0.99353	0.976678	0.985032	0.9427	3.63254	1.39415	0.952445	1	0.99353	0.976678	0.874681	0.807239	0.925651	0.907417	0.568952	0.800228	0.781228	0.962395	0.997834	0.98293	0.972554	0.99353	0.960388	0.989262	0.980837	0.9427	0.995677
ZNF136_KRAB-A	21.9274	0.869008	0.991695	1	0.983527	1	0.948377	1.06093	1.70714	1.12384	1	0.89843	0.933549	0.919177	1.18999	0.983527	0.959811	0.948377	1	1	0.912156	0.987594	0.987594	0.955969	0.971525	4.51618	0.622225	0.832652	1.65021	1	0.987594	0.955969	2.05137	1.23863	0.865858	0.835565	1.17335	2.31343	0.999533	0.929914	7.1733	0.967589	0.948377	0.987594	0.926307	0.979494	0.963684	0.895063	0.991695
ZNF317_KRAB-A	0.65988	0.856587	0.990784	1	0.981737	1	0.942988	1.48462	0.80526	0.873996	1	0.888441	0.926732	0.911026	0.930743	0.981737	0.95556	0.942988	1	1	0.903371	0.98624	0.98624	0.951332	0.968472	0.884785	12.8396	0.817507	0.903371	1	0.98624	0.951332	0.765144	0.839993	0.853188	0.820627	0.381231	0.827267	1.63648	0.922755	0.995371	0.964129	0.942988	0.98624	2.6535	0.977275	0.959826	0.884785	0.990784
ZNF574_NONE	1.57895	1.20734	0.984949	1	0.970345	1	0.909649	0.735783	1.29473	1.24463	1	0.828988	0.885045	0.861736	0.89107	1.49377	0.92902	0.909649	1	1	1.30933	0.977593	0.977593	0.922472	1.20525	1.26813	1.49806	0.731669	0.850537	1	0.977593	1.17127	0.844074	1.12953	0.779609	0.735783	1.96464	0.962999	1.18279	0.8791	0.992418	0.942398	0.909649	0.977593	3.46396	0.963204	0.935661	0.823771	0.984949
ZNF547_KRAB-A	14.1535	1.21077	0.985144	1	0.970723	1	1.64763	0.738347	2.26833	0.810545	1	0.830856	0.886384	1.09615	0.892348	0.970723	0.929887	0.910731	1	1	1.08206	0.977881	0.977881	0.923413	0.949866	1.49377	1.12194	0.734259	0.852211	1	0.977881	0.923413	0.667719	0.694061	0.781874	0.738347	1.01808	0.968956	0.780381	0.8805	0.992516	0.943112	0.910731	0.977881	0.874693	0.96367	0.936453	0.825683	0.985144
ZNF708_KRAB-A	11.4969	1.85814	0.985549	1	0.97151	1	0.912986	2.54906	2.87194	0.814815	1	1.51019	0.889179	1.10031	0.895013	0.97151	0.931694	1.15923	1	1	1.0865	0.978479	0.978479	1.17496	0.951186	0.829684	1.92279	4.33077	0.855709	1	0.978479	0.925373	0.673914	1.74801	3.12038	1.5461	1.64523	2.73758	1.9001	1.12169	0.992722	0.944599	0.912986	0.978479	0.877735	0.964639	1.19112	0.829684	0.985549
ZFP64_NONE	0.295014	0.798741	0.986195	1	0.972766	1	0.916599	0.752468	0.733161	0.82171	1	0.841059	0.893666	0.871853	0.899291	0.972766	0.934587	0.916599	1	1	0.861341	0.979434	0.979434	0.928513	0.953294	1.7382	0.496308	1.55607	0.861341	1	0.979434	0.928513	0.68402	0.565001	0.794301	0.752468	0.760524	0.554046	1.09246	0.888111	0.993049	0.946976	0.916599	0.979434	0.882625	0.966187	0.94074	0.836137	0.986195
ZSCAN31_SCAN	0.586971	0.817073	0.987715	1	0.975728	1	1.17474	1.19124	0.755639	0.838373	1	0.85623	0.904387	0.884488	0.909502	0.975728	0.941452	0.925201	1	1	0.874864	0.981685	0.981685	0.935972	0.958284	0.851695	0.525834	0.770115	0.874864	1	0.981685	0.935972	0.708995	0.593796	0.812942	0.982529	0.825847	0.583031	0.554866	0.899329	0.99382	0.952607	0.925201	0.981685	0.894327	0.969843	0.946996	1.08141	0.987715
FEZF1_NONE	1.88139	0.808257	0.986992	1	0.974318	1	1.16952	2.6169	0.744787	0.830371	1	1.07792	0.89926	0.878438	0.904621	0.974318	0.938177	0.921093	1	1	0.868385	0.980614	0.980614	1.43537	0.955906	1.29962	6.85585	0.964601	1.57102	1	0.980614	0.932412	0.696902	1.36158	1.23766	1.99911	2.42816	2.25667	2.28992	0.893963	0.993453	0.949922	0.921093	0.980614	1.36813	0.968102	0.944013	0.844229	0.986992
ZNF280A_NONE	0.472526	0.85071	0.990345	1	1.24543	1	0.940406	0.813596	0.797776	0.868723	1	0.883691	0.923472	0.907138	0.927648	0.980874	0.953519	0.940406	1	1	0.899185	0.985587	0.985587	0.949107	0.967003	0.879901	0.585881	0.810382	0.899185	1	0.985587	0.949107	1.1647	0.65095	0.847197	0.813596	0.370197	0.640783	0.77952	0.919334	0.995149	0.962466	0.940406	0.985587	0.915232	0.976206	0.957972	0.879901	0.990345
KLF15_NONE	0.663495	1.27756	2.05544	1	0.977733	1	0.931084	0.788893	0.771566	1.07923	1	0.866756	1.64948	0.893204	3.38843	0.977733	0.946131	0.931084	1	1	0.884211	0.983206	0.983206	0.941062	0.961672	1.56038	6.75287	0.997187	0.884211	1	0.983206	0.941062	0.726862	0.614895	0.825994	0.788893	0.695949	0.767307	1.19854	0.907042	0.994339	0.956436	0.931084	0.983206	0.902382	0.97232	0.951256	0.8625	0.988741
ZNF784_NONE	0.649613	0.819868	0.987941	1	0.97617	1	1.67615	0.777096	0.759096	2.20171	1	0.85853	0.906001	0.886396	0.911039	0.97617	0.94248	0.926493	1	1	0.876909	0.98202	0.98202	0.93709	0.959029	1.0844	0.530521	0.773428	0.876909	1	0.98202	0.93709	0.71286	0.921074	0.815786	0.777096	0.750347	1.69696	0.710411	0.901019	0.993934	0.953449	0.926493	0.98202	0.896092	0.970388	0.947933	0.854055	0.987941
ZBTB42_BTB	0.806838	1.28707	0.989225	1	0.978679	1	0.933879	1.44041	0.779295	0.855551	1	1.10693	1.16211	0.897365	1.66412	0.978679	0.948349	0.933879	1	1	0.888678	0.983924	0.983924	0.943476	0.963276	0.86768	8.39512	0.792754	0.888678	1	0.983924	1.45241	0.735586	0.962679	1.50571	1.22567	0.344735	0.78072	0.587343	0.910718	0.994583	0.958248	0.933879	0.983924	1.15064	0.97349	0.953273	1.33573	0.989225
KLF12_NONE	0.359581	0.807713	0.986947	1	0.97423	1	0.920838	0.762889	0.744119	0.829876	1	0.848502	0.898942	0.878063	0.904317	0.97423	0.937973	0.920838	1	1	0.867983	2.30287	0.980547	0.932191	0.955758	0.843767	0.510498	0.75906	0.867983	1	1.24501	0.932191	0.69616	0.578899	0.803421	1.38017	0.302307	0.568026	0.685195	0.893629	0.993431	0.949755	0.920838	0.980547	0.88838	0.967994	0.943827	0.843767	0.986947
ZBTB18_BTB	0.402848	0.910142	0.994545	1	0.989149	1	0.965575	0.88582	0.875189	0.921644	1	0.931058	0.955454	0.945544	3.28332	0.989149	0.973307	0.965575	1	1	0.940665	0.99184	0.99184	0.970716	0.981164	0.928686	0.71548	0.883673	0.940665	1	0.99184	0.970716	0.846737	0.768241	0.907876	0.88582	0.510952	0.965275	0.738671	0.952957	0.997265	0.978531	0.965575	0.99184	0.950473	0.986473	0.975912	0.928686	0.994545
ZBTB48_BTB	1.09788	1.93521	0.988273	1	0.976818	1	1.92998	1.20375	0.764223	1.07246	1	0.861926	0.908379	0.88921	0.913301	0.976818	0.943992	0.928393	1	1	1.35457	1.5125	0.982512	0.938735	0.960125	1.5514	1.69741	0.778339	0.879925	1	0.982512	0.938735	0.718606	1.74749	0.819992	0.99285	1.9067	1.23571	1.17757	0.90351	0.994102	0.954686	0.928393	0.982512	0.898692	0.971189	0.949309	0.85754	0.988273
ZFP42_NONE	1.75241	1.03463	0.987534	1	0.975375	1	0.924171	0.771221	0.955961	0.836358	1	0.854399	0.9031	0.882968	0.908277	0.975375	0.940631	0.924171	1	1	0.873235	0.981417	0.981417	0.93508	0.957688	1.07902	1.36711	0.767485	0.873235	1	0.981417	0.93508	0.89633	0.908601	0.810682	0.771221	1.4912	0.735708	0.699874	1.14018	0.993728	0.951934	0.924171	0.981417	0.89292	0.969407	0.946249	0.849816	0.987534
PRDM1_SET	0.341666	0.810992	0.987218	1	0.974758	1	0.922373	0.766712	0.748145	0.832855	1	0.851213	0.900856	0.88032	0.906141	0.974758	0.939198	0.922373	1	1	1.10515	0.980948	0.980948	0.933522	0.956648	0.846548	0.515808	0.762925	0.870399	1	0.980948	0.933522	0.700637	0.58407	0.806756	2.62782	1.79629	0.72784	0.838864	0.895633	0.993568	0.950759	0.922373	0.980948	0.89047	0.968646	0.944943	0.846548	1.25348
GLI4_NONE	0.433387	1.46159	0.986962	1	0.974259	1	0.920923	0.763101	0.744342	1.05391	1	1.53532	0.899048	0.878188	0.904419	0.974259	0.938041	1.16931	1	1	0.868117	0.98057	0.98057	0.932265	0.955807	2.43722	0.510791	0.759274	0.868117	1	0.98057	0.932265	0.696407	0.735395	0.803606	1.58637	1.52658	1.18143	1.4137	0.89374	0.993438	0.949811	0.920923	2.56739	13.3496	3.57891	0.943889	0.843921	0.986962
KLF1_NONE	0.806528	0.937145	0.980666	1	0.962066	1	0.886408	0.683385	0.661117	0.765941	1	0.789794	0.856474	0.828495	0.863766	0.962066	0.91027	0.886408	1	1	0.81518	0.971277	0.971277	0.902175	0.935451	0.783692	0.411634	0.678812	0.81518	1	0.971277	0.902175	1.09605	0.60917	0.732746	0.683385	0.650403	0.974327	0.558944	1.07837	0.990239	0.926904	0.886408	0.971277	0.842252	0.953027	0.918512	0.783692	0.980666
EGR3_NONE	0.285926	0.98955	0.984515	1	0.969502	1	0.907246	0.730126	0.709749	0.80399	1	0.824852	0.882072	0.858257	0.888233	0.969502	0.92709	0.907246	1	1	0.846825	0.976951	0.976951	0.920379	0.947822	0.819536	0.467216	0.725957	0.846825	1	0.976951	0.920379	0.658306	0.97	0.774604	1.32089	1.41945	0.949971	1.03194	1.34852	0.992197	0.940809	0.907246	0.976951	0.870001	0.962166	0.933899	0.819536	0.984515
EGR2_NONE	0.131912	0.830089	0.988756	1	0.977762	1	0.931171	0.78912	0.771805	1.07945	1	1.33454	0.91186	0.893333	0.916612	0.977762	0.9462	0.931171	1	1	2.07694	0.983229	0.983229	0.941137	0.961723	0.862661	0.548111	0.785595	0.88435	1	0.983229	0.941137	0.727132	0.615217	0.826189	0.78912	0.33508	1.25695	0.888055	0.907157	0.994346	0.956492	0.931171	0.983229	0.902502	0.972357	0.951318	0.862661	0.988756
ZNF467_NONE	2.23879	1.03721	0.9877	1	0.975699	1	0.925115	0.773604	0.75541	1.7425	1	0.856077	0.90428	0.884362	0.9094	1.23885	1.70309	1.42414	1	1	1.34657	0.981663	0.981663	1.18832	1.47513	2.22955	1.09248	0.769895	0.874728	1	0.981663	0.935898	0.708739	0.753569	0.812754	1.1909	2.27013	0.739898	1.15284	0.899216	0.993812	1.46638	2.17268	1.77596	3.30599	1.49294	0.946934	0.851538	0.9877
MAZ_NONE	1.99175	0.798919	0.98621	1	0.972795	1	2.8946	0.752673	0.733377	0.821872	1	1.06809	0.893771	0.871976	0.899391	0.972795	0.934654	0.916684	1	1	0.861473	0.979457	0.979457	0.928586	0.953343	0.836288	0.496584	0.748733	1.79087	1	0.979457	0.928586	0.684259	0.565273	0.794481	1.15868	2.01558	1.00284	2.36934	0.888221	0.993057	0.947031	0.916684	0.979457	0.882739	0.966224	0.940802	0.836288	0.98621
ZNF85_KRAB	1.02111	0.82894	0.988666	1	0.977585	1	0.930649	1.2127	0.770372	0.849114	1	0.865974	0.911205	0.892557	0.91599	0.977585	1.96614	0.930649	1	1	0.883517	0.983094	0.983094	0.940686	0.961422	0.861696	1.28254	3.32238	1.12181	1	0.983094	0.940686	0.725518	0.613293	0.82502	1.42517	1.5917	0.602699	1.19511	0.906471	0.9943	0.956153	0.930649	0.983094	1.87467	0.972138	0.950941	0.861696	0.988666
ZNF594_NONE	0.939359	0.780705	0.984635	1	0.969734	1	0.907908	1.12636	0.711372	0.80523	1	0.825989	0.88289	0.859214	0.889014	0.969734	0.927621	0.907908	1	1	1.07652	0.977128	0.977128	0.920956	0.94821	1.04205	0.46918	0.727524	0.847846	1	0.977128	0.920956	1.01614	0.828409	1.19456	1.12636	2.65919	0.95353	0.767204	0.876849	0.992258	0.941247	0.907908	0.977128	0.870891	0.962452	0.934384	0.8207	0.984635
ZNF322_NONE	1.36753	0.805361	0.986751	1	0.973849	1	1.41585	0.760152	0.741239	0.827737	1	0.846554	0.897564	0.87644	0.903005	0.973849	0.93709	0.919732	1	1	0.866246	0.980258	0.980258	0.931232	0.955116	0.84177	0.506731	0.756293	0.866246	1	0.980258	0.931232	0.692963	0.57522	1.01708	0.760152	0.299137	0.564324	0.824976	0.892188	0.993331	0.949031	0.919732	0.980258	0.886876	0.967524	0.943023	0.84177	0.986751
ZNF490_KRAB-A	7.77641	0.850911	0.99036	1	0.980904	1	0.940494	2.78934	1.87422	0.868903	1	0.883854	1.42178	0.907271	0.927754	0.980904	0.953589	0.940494	1	1	0.899329	0.985609	0.985609	0.949184	0.967054	3.25371	1.69312	1.02926	0.899329	1	0.985609	1.7172	0.756876	0.65131	0.847402	0.813837	2.06964	0.641148	1.44274	0.919451	0.995157	0.962523	0.940494	0.985609	5.85297	0.976243	0.958035	0.880069	0.99036
GLIS1_NONE	1.25382	0.823247	0.988213	1	0.9767	1	1.92926	0.781063	0.763285	0.843965	1	0.861306	0.907946	0.888697	1.65154	0.9767	0.943717	0.928047	1	1	0.879375	0.982423	0.982423	0.938435	0.959925	0.856905	0.536258	0.777442	0.879375	1	0.982423	0.938435	0.717555	0.603851	0.819224	0.781063	0.324525	0.59317	0.565179	1.14662	0.994071	0.954461	0.928047	0.982423	0.898218	0.971044	0.949059	0.856905	0.988213
OSR2_NONE	0.516778	1.41087	0.98456	1	0.969589	1	0.907494	0.730707	0.710357	0.804455	1	0.825278	0.882378	0.858615	0.888526	0.969589	0.927289	0.907494	1	1	0.847208	0.977017	0.977017	0.920595	0.947967	0.819972	0.467951	0.922501	0.847208	1	0.977017	0.920595	0.65897	0.826519	0.775118	1.12487	0.267624	1.51859	0.63122	0.876315	0.99222	0.940973	0.907494	0.977017	0.870335	0.962273	0.934081	0.819972	0.98456
ZNF610_KRAB-A	4.77957	0.885051	0.992836	1	0.985774	1	0.955201	2.93049	0.842033	0.89941	1	1.89432	0.942213	0.929573	1.20042	0.985774	0.965179	0.955201	1	1	0.92338	0.989293	0.989293	0.96183	0.975368	0.908252	4.02102	1.08229	0.92338	1	0.989293	0.96183	0.807682	0.715896	0.882234	1.31624	0.442654	0.706769	0.682408	0.939021	0.996405	0.971948	0.955201	0.989293	0.93585	0.982281	0.968551	0.908252	0.992836
ZNF770_NONE	0.993857	0.815961	0.987625	1	0.975552	1	0.924686	0.772519	0.754265	0.837365	1	1.086	1.14749	0.883728	1.15403	0.975552	0.941041	0.924686	1	1	0.874049	0.981551	0.981551	1.44017	1.21636	0.850755	3.35045	1.59821	0.874049	1	1.51102	3.71106	1.08908	1.23068	0.811811	1.18923	0.313817	0.89475	0.702189	0.898655	0.993774	0.95227	1.17408	0.981551	0.893623	0.969625	0.946623	1.30967	0.987625
ZNF667_KRAB-A	1.92691	1.03981	0.987866	1	0.976022	1	0.926062	6.00839	0.75794	0.84006	1	1.32046	2.61495	0.885759	2.13842	0.976022	0.942137	0.926062	1	1	0.876226	0.981908	0.981908	0.936717	1.21737	1.54367	6.52081	1.39723	1.82154	1	0.981908	5.48428	1.0954	0.918738	1.03461	1.19459	0.575527	0.586067	0.858921	0.900455	0.993896	0.953168	1.4256	0.981908	3.31077	0.970207	0.94762	1.31354	0.987866
ZFP28_KRAB-A	5.34275	1.06132	0.98921	1	0.978649	1	0.933791	1.86936	1.61952	0.855376	1	1.10673	2.64292	1.38122	0.919739	0.978649	0.94828	0.933791	1	1	0.888538	0.983901	0.983901	0.943401	0.963225	2.03741	0.558396	2.28878	5.6815	1	0.983901	0.943401	0.73531	0.793594	1.05651	0.795961	0.344414	0.614545	0.587	0.910603	0.994575	0.958191	0.933791	0.983901	1.39487	0.973453	0.95321	0.867517	0.98921
ZNF816_KRAB-A	8.88601	0.898542	0.993766	1	0.987609	1	0.960823	2.98706	1.32355	0.911385	1	0.921926	2.22967	1.44429	0.952214	0.987609	0.969589	0.960823	1	1	0.932715	0.990678	0.990678	0.966649	0.978516	1.91101	1.42896	2.04124	3.69991	1	0.990678	0.966649	1.05195	1.14454	1.13768	0.871524	0.47741	0.734918	0.711943	0.94656	0.996873	0.975522	0.960823	0.990678	0.943758	0.98456	0.972547	1.1672	0.993766
ZNF778_KRAB-A	2.31302	0.84531	0.989936	1	0.980072	1	0.938014	2.76645	1.21758	0.86387	1	1.11648	2.16174	1.39094	1.17421	0.980072	0.951626	0.938014	1	1	0.895323	0.984979	0.984979	0.947045	0.96564	0.875402	1.19675	1.02067	1.1368	1	0.984979	0.947045	0.748785	0.641371	1.06871	1.02486	0.360482	0.631083	0.603959	0.916171	0.994942	0.960923	0.938014	0.984979	0.911924	0.975214	0.956252	1.34761	0.989936
ZNF418_KRAB-A	3.8491	0.885923	0.992897	1	0.985894	1	0.955567	1.77966	1.52541	0.900186	1	1.40385	2.46818	2.43534	0.945869	0.985894	0.965467	0.955567	1	1	0.923986	0.989383	0.989383	0.962144	0.975574	1.64444	0.658483	2.23461	0.923986	1	0.989383	0.962144	0.809015	0.717642	0.883125	0.856083	0.444777	0.708548	0.68427	0.939511	0.996436	1.7588	1.98647	2.85731	0.936365	2.57226	0.968812	1.15412	0.992897
ZNF549_KRAB-A	6.14136	0.903964	0.994132	1	0.988333	1	0.963053	1.35191	1.56844	0.916184	1	0.926201	0.952228	1.19561	0.954912	0.988333	0.971335	0.963053	1	1	0.936439	0.991224	0.991224	0.968559	0.979761	1.1728	0.700326	1.34842	1.18901	1	0.991224	0.968559	0.83698	0.754934	0.901559	0.878194	0.492628	0.746617	0.919621	0.94956	0.997058	0.976936	0.963053	0.991224	0.946906	0.985459	0.974127	0.923676	0.994132
ZNF214_KRAB-A	5.72987	0.927994	0.995708	1	0.991452	1	0.972744	2.13252	1.38427	0.937368	1	0.945005	1.22483	0.956697	0.966664	0.991452	0.978901	0.972744	1	1	0.952768	0.993575	0.993575	0.97684	0.985137	0.943084	3.22776	1.63951	0.952768	1	0.993575	0.97684	1.3477	0.808348	0.926141	0.908016	0.570703	0.801367	0.782446	0.962652	0.997849	0.983049	0.972744	0.993575	0.960659	0.989338	0.980971	1.96052	1.26426
SCRT1_SNAG	0.454867	0.825515	0.988394	1	0.977054	1	0.929086	0.99511	0.766104	0.846017	1	0.863167	0.909247	0.890237	0.914127	0.977054	0.944543	0.929086	1	1	0.881027	0.982691	0.982691	0.939334	0.960524	0.858815	0.540151	0.78014	0.881027	1	0.982691	0.939334	0.720719	0.607593	0.821533	0.78373	1.4779	0.91895	1.95027	0.904419	0.994163	0.955137	0.929086	0.982691	0.899641	0.971481	0.949811	0.858815	0.988394
KLF14_NONE	0.187725	1.27756	0.988741	1	0.977733	1	0.931084	0.788893	0.771566	0.849978	1	0.866756	0.911751	0.893204	0.916509	0.977733	0.946131	0.931084	1	1	1.12269	0.983206	0.983206	0.941062	0.961672	0.8625	0.547774	0.785366	0.884211	1	0.983206	0.941062	0.726862	0.614895	0.825994	0.788893	1.68917	0.604317	0.576544	0.907042	0.994339	0.956436	0.931084	0.983206	0.902382	0.97232	0.951256	0.8625	0.988741
ZNF595_KRAB-A	12.9855	0.869849	0.991756	1	0.983647	1	0.948739	2.86729	1.26584	0.885863	1	0.899104	1.43783	0.919725	0.937647	0.983647	0.960096	0.948739	1	1	0.912747	0.987685	0.987685	0.95628	0.971729	0.895757	1.80199	1.95794	1.15892	1	0.987685	0.95628	0.784737	0.871344	0.866716	0.83658	0.408076	0.676605	1.00213	0.930395	0.995861	0.96782	0.948739	0.987685	0.926811	0.979642	0.963943	1.37895	0.991756
ZNF320_KRAB-A	9.36663	0.823812	0.988258	1	0.976788	1	0.928307	0.781728	0.763988	0.844477	1	1.32663	0.908271	0.889081	0.913198	0.976788	0.943923	1.17868	1	1	0.879787	0.98249	0.98249	0.93866	0.960075	2.93858	1.55149	0.778114	0.879787	1	0.98249	0.93866	0.718343	0.604783	1.26202	1.20341	0.325379	0.754347	0.871521	0.903396	0.994094	0.95463	0.928307	0.98249	0.898573	0.971153	0.949247	0.857381	0.988258
ZFP3_NONE	1.80629	0.86775	0.991604	1	0.983348	1	0.947836	0.834046	0.819577	0.883987	1	0.897421	0.932863	0.918355	0.936561	0.983348	0.959385	0.947836	1	1	0.911269	0.987459	0.987459	0.955504	0.971218	0.894024	0.619634	0.831112	0.911269	1	0.987459	0.955504	0.78161	0.682275	0.864574	0.834046	0.403635	0.672562	0.821224	0.929193	0.995784	0.967242	0.947836	0.987459	0.925552	0.979271	0.963297	0.894024	0.991604
IKZF3_NONE	1.05881	0.754652	0.982259	1	0.965136	1	0.894933	0.702024	0.680453	0.781275	1	0.803965	0.866907	0.840584	0.873748	0.965136	0.917171	0.894933	1	1	0.828012	0.973622	0.973622	0.909637	0.940542	0.79817	0.432997	0.697601	0.828012	1	0.973622	0.909637	0.964524	0.501655	1.15386	0.702024	0.760559	0.490543	0.461896	0.860173	0.99105	0.932621	0.894933	0.973622	0.853543	0.956796	0.924831	0.79817	0.982259
ZNF71_NONE	1.09029	1.16027	0.982169	1	0.964963	1	1.37694	2.21338	1.41224	0.990881	1	1.01978	2.26824	0.839896	0.873182	0.964963	0.916781	0.894451	1	1	0.827282	0.97349	0.97349	1.39966	0.940255	0.797344	0.548186	0.69652	0.827282	1	0.97349	0.909215	0.625352	0.905244	0.748582	0.700952	0.757607	1.28102	0.709094	0.859556	0.991004	1.18375	1.61818	2.81141	0.852901	2.24659	0.924475	0.797344	0.982169
ZBTB14_BTB	0.782252	1.29732	0.989739	1	0.979686	1	0.936866	0.804095	0.787679	1.09392	1	0.877224	0.919014	0.901829	0.923413	0.979686	0.950718	0.936866	1	1	0.893475	0.984687	1.51585	0.946055	1.22525	0.873253	0.570894	0.800757	0.893475	1	0.984687	0.946055	0.745087	0.636858	0.839069	0.804095	0.355984	0.626517	0.59927	0.914656	0.994843	0.960182	0.936866	0.984687	0.91034	0.974736	0.955426	0.873253	0.989739
ZNF250_KRAB-A	3.40767	0.791706	0.985594	1	0.971598	1	0.913237	0.744333	0.724624	0.815293	1	0.835198	0.889491	0.866948	0.895311	0.971598	0.931895	0.913237	1	1	0.8561	0.978546	0.978546	0.925592	0.951332	0.830131	0.485511	0.740306	0.8561	1	0.978546	0.925592	0.674609	0.554355	0.787152	0.744333	0.281646	0.543348	0.93122	0.883746	0.992745	0.944764	0.913237	0.978546	1.1149	0.964747	0.938286	0.830131	0.985594
YY1_NONE	0.167204	0.894296	0.993476	1	0.987037	1	0.959065	0.866316	0.854168	0.907621	1	0.91857	0.947135	0.935499	0.95009	0.987037	0.968211	0.959065	1	1	0.929787	0.990246	0.990246	0.965143	0.977533	0.915808	0.677473	0.863858	0.929787	1	0.990246	0.965143	0.821898	0.734668	0.891678	0.866316	0.466013	0.725913	0.702473	0.944199	0.996727	0.974406	0.959065	0.990246	0.941281	0.983849	0.971299	0.915808	0.993476
KLF10_NONE	0.522436	0.978768	0.998796	1	0.997595	1	0.992227	0.972459	0.969618	1.51119	1	0.983991	0.98986	0.987504	0.990451	0.997595	0.99401	0.992227	1	1	0.98633	0.998196	0.998196	0.993415	1.26438	0.983408	0.919647	0.971889	0.98633	1	0.998196	0.993415	0.961751	0.937837	0.978191	0.972459	0.826242	0.935194	0.927874	0.98927	0.999398	0.995203	0.992227	0.998196	0.988681	0.996996	0.994606	0.983408	0.998796
ZNF281_NONE	0.865644	1.02372	0.986826	1	0.973995	1	0.920157	0.761203	0.742344	1.2755	1	0.847302	0.898093	0.877063	0.90351	0.973995	0.937429	0.920157	1	1	0.866913	0.980369	0.980369	0.9316	0.955363	0.842537	0.508174	0.757355	0.866913	1	0.980369	0.9316	1.44311	1.0432	0.801948	0.761203	0.624376	1.0235	0.827185	0.892742	0.99337	0.949309	0.920157	0.980369	0.887454	0.967704	0.943332	0.842537	0.986826
ZNF329_NONE	1.64523	0.854958	0.990663	1	0.981499	1	0.942274	1.48109	0.803182	0.872535	1	0.887125	0.92583	0.90995	1.18069	0.981499	0.954996	0.942274	1	1	0.902212	0.98606	0.98606	0.950718	0.968066	0.883432	0.594069	0.815529	0.902212	1	0.98606	0.950718	1.58566	0.658601	0.851527	0.818675	0.378122	0.648537	1.12515	0.921808	0.99531	0.96367	0.942274	0.98606	0.917821	0.97698	0.959313	0.883432	0.990663
ZNF184_KRAB-A	2.22874	0.907615	0.994377	1	0.988817	1	0.964546	2.78728	1.34209	0.919412	1	0.929073	0.954137	0.943951	0.956718	0.988817	0.972503	0.964546	1	1	0.938939	0.991589	0.991589	0.969836	0.980592	1.42649	0.709228	1.11798	0.938939	1	0.991589	0.969836	0.842734	0.762763	0.905291	1.12077	0.503325	0.754626	0.732738	0.95157	0.99718	1.24163	1.22469	1.25903	0.949017	1.51796	1.2382	0.926639	0.994377
ZNF140_KRAB-A	4.74725	0.878993	0.99241	1	0.984934	1	0.952642	0.847651	1.28408	0.894018	1	0.906413	0.938959	1.42499	0.942343	0.984934	0.963168	0.952642	1	1	0.919157	0.988658	0.988658	0.959633	0.97393	0.903283	2.03134	1.75644	1.16706	1	0.988658	0.959633	0.798475	0.893756	0.876048	0.847651	0.42834	0.694558	1.2115	0.9356	0.996191	0.970316	0.952642	0.988658	0.932265	0.981238	0.966729	0.903283	0.99241
ZNF257_KRAB-A	5.5067	0.945813	0.996827	1	0.993675	1	0.979731	1.43229	0.923571	0.952985	1	0.958802	0.973658	0.967661	0.97517	0.993675	0.984335	0.979731	1	1	0.96469	0.995248	0.995248	0.982796	0.988983	0.957341	3.00393	0.929033	1.74525	1	0.995248	0.982796	1.88125	0.851023	0.944392	0.930408	0.642919	0.845299	0.829674	0.972152	0.998411	0.987429	0.979731	0.995248	0.97065	0.992106	0.985879	0.957341	0.996827
ZNF34_KRAB-A	1.6234	0.858838	0.990951	1	0.982065	1	0.943972	0.823325	0.808136	0.876013	1	0.890255	0.927974	0.912509	0.931922	0.982065	3.01981	0.943972	1	1	0.904969	0.986488	0.986488	0.952179	0.96903	1.36493	2.71129	1.2627	0.904969	1	0.986488	0.952179	0.768442	1.02476	0.855483	0.823325	0.385591	0.655715	0.629337	0.924059	0.995455	0.964762	0.943972	0.986488	0.920177	0.977681	0.960531	0.886651	0.990951
ZNF394_KRAB-A;SCAN	0.780247	0.932567	0.995999	1	0.99203	1	0.974553	0.91374	0.905431	0.941384	1	0.948558	0.966981	0.959527	0.968863	0.99203	0.98031	0.974553	1	1	0.955842	0.99401	0.99401	0.978383	0.986135	0.946754	0.774446	0.912066	0.955842	1	0.99401	0.978383	1.12109	0.819038	0.930823	0.91374	0.58789	1.25056	1.00842	0.965107	0.997995	0.984185	0.974553	0.99401	0.96324	0.990057	0.982244	0.946754	0.995999
ZNF596_KRAB-A	7.09129	0.822305	0.988137	1	0.976553	1	0.927615	0.779957	1.37877	0.843113	1	0.860533	0.907405	0.888057	0.912374	0.976553	0.943373	0.927615	1	1	0.878689	0.982311	0.982311	0.938061	0.959676	1.31792	0.534652	2.03262	0.878689	1	0.982311	0.938061	0.909423	0.602306	0.818266	0.779957	0.323112	0.910739	0.563592	0.902489	0.994033	0.95418	0.927615	0.982311	0.897626	0.970862	0.948746	0.856111	0.988137
ZNF200_NONE	0.74369	0.811724	0.987278	1	0.974876	1	0.922715	1.18161	0.749045	0.83352	1	0.851818	0.901283	0.880823	0.906547	0.974876	0.93947	0.922715	1	1	0.870938	0.981038	0.981038	0.933818	0.956846	0.847169	0.517003	0.969792	0.870938	1	0.981038	0.933818	0.701639	0.585232	0.807501	0.767567	0.307826	0.574403	0.546108	0.896079	0.993598	0.950983	0.922715	0.981038	0.890935	0.968791	0.945192	0.847169	0.987278
ZNF134_NONE	1.52882	0.841354	0.989633	1	0.979479	1	0.93625	1.66818	0.785938	1.32438	1	0.876102	0.918238	0.900906	0.922676	0.979479	0.950229	0.93625	1	1	0.892483	0.98453	0.98453	0.945523	0.964632	0.8721	0.72164	0.799096	0.892483	1	0.98453	0.945523	0.943536	0.805574	0.837663	1.88461	0.353608	0.792408	0.596775	0.913843	0.99479	0.959783	0.93625	0.98453	0.90949	0.974479	0.954982	0.8721	0.989633
ZNF98_KRAB-A	1.18108	0.866913	0.991543	1	0.983229	1	0.947475	0.833037	0.818499	3.50365	1	0.89675	0.932406	0.917808	0.936128	0.983229	0.9591	0.947475	1	1	0.91068	0.987368	0.987368	0.955193	0.971015	0.893333	1.28455	2.62116	0.91068	1	0.987368	0.955193	0.780366	0.680697	0.86372	1.95643	0.401885	0.670959	0.645117	0.928713	0.995754	0.96701	0.947475	0.987368	0.925049	0.979123	0.963039	0.893333	0.991543
ZNF513_NONE	5.97082	0.881363	1.52799	1	0.985264	1	0.953645	2.22691	0.837218	0.896129	1	1.39826	0.940235	0.927196	1.45252	0.985264	0.963957	0.953645	1	1	2.16257	0.988907	0.988907	0.960495	0.974494	0.905228	1.52289	0.847835	0.920812	1	0.988907	0.960495	0.802067	0.899676	1.1154	0.850531	0.433852	0.699304	1.03851	0.936941	0.996275	0.970956	0.953645	0.988907	1.18549	0.981648	0.967444	0.905228	0.992577
ZNF35_NONE	1.32413	0.818748	0.987851	1	0.975993	1	0.925976	0.985019	0.757709	1.06642	1	0.857609	0.905355	0.885632	0.910423	0.975993	0.942069	0.925976	1	1	0.87609	0.981886	0.981886	0.936643	0.958731	0.853109	0.528636	0.772099	0.87609	1	0.981886	0.936643	0.711309	0.596505	0.814646	0.775783	0.317851	0.585762	0.557641	0.900342	0.993888	0.953112	0.925976	0.981886	0.895385	0.97017	0.947558	0.853109	0.987851
ZNF341_NONE	0.448918	0.795384	0.985909	1	0.972211	1	0.914999	0.748582	0.729081	1.03945	1	0.838265	0.891678	0.869516	0.897396	0.972211	1.68847	0.914999	1	1	1.55376	0.979012	0.979012	0.927123	0.952361	1.28276	0.49112	0.945425	0.858843	1	0.979012	3.67773	0.679518	0.559894	0.790889	0.748582	0.28621	0.993055	0.660679	0.886032	0.992905	0.945924	0.914999	0.979012	0.880458	0.965503	0.939573	0.833273	0.985909
[truncated: 178 more columns]

## Sheet: Figure3A_SAINTScore
	TRIM28	DIMT1	CSNK1E	RAD18	ZNF467	ZNF669	LANCL1	Q96T88	ZNF460	RIPK4	ZNF546	LENG8	ZNF768	ZNF724P	SQSTM1	DDX20	TEX10	COIL	ZNF225	CCDC6	GRB2	PRKCA	CAMK2G	CAMK2D	CAMK2B	SCML1	HUWE1	CENPB	TP53BP1	MYH6	MIB1	PCM1	PSMD3	PSMC3	PSMC5	GLYR1	PPP2CA	NDUFS3	NUP160	NUP205	IQGAP2	MRPS31	MRPS9	DAP3	TRIM27	MRPS23	KRI1	KRR1	PAK1IP1
ZNF264_KRAB-A	1	1	0	0	0	0	0	0	0	0	0	0	0	0	0	0	0	0.5	0	0	0	0	0	0	0	0	0	0	0	0	0	0	0	0	0	0	0	0	0	0	0	0	0	0	0	0	0	0	0
ZNF692_NONE	1	0	1	1	1	0	0	0	0	0	0	0	0	0	0	0	0	0	0	0	0	0	0	0	0	0.95	0	0	0	0	0	0	0	0	0	0	0	0	0	0	0	0	0	0	0	0	0	0	0
ZNF502_NONE	1	0	0	0	0	1	0	1	0	0	0	0	0	0	0	0	0	0	0	0	0	0	0	0	0	1	0	0	0	0	0	0	0	0	0	0	0	0	0	0	0	0	0	0	0	0	0	0	0
ZNF175_KRAB-A	1	0	0	0	0	0	0	0.46	0	0	0	0	0	0	0	0	0	0	0	0	0	0	0	0	0	0	0	0.46	0	0	0	0	0	0	0	0	0	0	0	0	0	0	0	0	0	0	0	0	0
ZNF324_KRAB-A	1	0	0	0	0	0	0	0	0	0	0	0	0	0	0	0	0	0	0	0	0	0	0	0	0	0	0	0	0	0	0	0	0	0	0	0	0	0	0	0	0	0	0	0	0	0	0	0	0
ZNF33A_KRAB-A	1	0	0	0	0	0	0	0	0.99	0	0	0	0	0	0	0	0	0	0	0	0	0	0	0	0	1	0	0	0	0	0	0	0	0	0	0	0	0	0	0	0	0	0	0	0	0	0	0	0
ZNF582_KRAB-A	1	0	0	0	0	0	0	0	0	0	0	0	0	0	0	0	0	0	0	0	0	0	0	0	0	0	0	0	0	0	0	0	0	0	0	0	0	0	0	0	0	0	0	0	0	0	0	0	0
ZNF354A_KRAB-A	1	0	0	0	0	0	0	0	0	0.69	0	0	0	0	0	0	0	0	0	0	0	0	0	0	0	0	0	0	0	0	0	0	0	0	0	0	0	0	0	0	0	0	0	0	0	0	0	0	0
ZNF554_KRAB-A	1	0	0	0	0	0	0	0	0.91	0.81	0	0	0	0	0	0	0	0	0	0	0	0	0	0	0	0	0.78	0	0	0	0	0	0	0	0	0	0	0	0	0	0	0	0	0	0	0	0	0	0
ZNF350_KRAB-A	1	0	0	0	0	0	1	0	0	0	0	0	0	0	0	0	0	0	0	0	0	0	0	0	0	0	0.08	0.5	0	0	0	0	0	0	0	0	0	0	0	0	0	0	0	0	0	0	0	0	0
ZNF382_KRAB-A	1	0	0	0	0	0	0	0	0.49	0	0	0	0.46	0	0	0	0	0	0	0	0	0	0	0	0	0.96	0.08	0.46	0	0	0	0	0	0	0	0	0	0	0.17	0.2	0	0	0	0	0	0	0	0	0
ZNF8_KRAB-A	1	0	0	0	0	0	0	1	0.41	0	0	0	0	0	0	0	0	0	0	0	0	0	0	0	0	0	0	0	0	0	0	0	0	0	0	0	0	0	0	0	0	0	0	0	0	0	0	0	0
ZNF45_KRAB-A	1	0	0	0	0	0	0	1	0	0	0	0	0	0	0	0	0	0	0	0	0	0	0	0	0	1	0	0	0	0	0	0	0	0	0	0	0	0	0	0	0	0	0	0	0	0	0	0	0
ZNF454_KRAB-A	1	0	0	0	0	0	0	1	0.95	0	1	0	0	0	0	0	0	0	0	0	0	0	0	0	0	1	0	0	0	0	0	0	0	0	0	0	0	0	0	0	0	0	0	0	0	0	0	0	0
ZNF30_KRAB-A	1	0	0	0	0	0	0	0.5	1	0	0	0	0.99	0.5	0	0	0	0	0	0	0	0	0	0	0	0.98	0	0.95	0	0	0	0	0	0	0	0	0	0	0	0	0	0	0	0	0.48	0	0	0	0
ZNF669_KRAB-A	1	0	0	0	0	0	0	1	1	0	0	0	0	0	0	0	0	0	0	0	0	0	0	0	0	0.95	0	0	0	0	0	0	0	0	0	0	0	0	0	0	0	0	0	0	0	0	0	0	0
ZNF37A_KRAB-A	1	0	0	0	0	0	0	0	1	0	0	0	0	0	0	0	0	0	0	0	0	0	0	0	0	0	0	0	0	0	0	0	0	0	0	0	0	0	0	0	0	0	0	0	0	0	0	0	0
ZNF121_NONE	1	0	0	0	0	0	0	1	0.5	0	0	1	1	1	0.48	0	0	0	0	0	0	0	0	0	0	1	0	0.99	0	0	0	0	0	0.04	0	0	0	0	0	0	0	0	0	0	0	0	0	0	0
ZIM3_KRAB-A	1	0	0	0	0	0	0	0	0	0	0	0	0	0	0	0	0	0	0	0	0	0	0	0	0	0	0	0.5	0	0	0	0	0	0	0	0	0	0	0	0	0	0	0	0	0	0	0	0	0
ZNF146_NONE	1	0	0	0	0	0	0	0.95	0	0.81	0	0	0.46	0	1	0	0.5	0	0	0	0	0	0	0	0	0	0.95	0	0	0	0	0	0	0.94	0.72	0.69	0.13	0.55	0.34	0	0	0	0	0	0	0	0	0	0
ZNF563_KRAB-A	1	0	0	0	0	0	0	0	0.41	0	0	0	0	0	0	1	0	0	0	0	0	0	0	0	0	1	0.26	0	0.99	0	0	0	0	0	0	0	0	0	0.85	0	0	0	0	0	0.91	0	0	0	0
ZNF224_KRAB-A	1	0	0	0	0	0	0	0.5	0.46	0.46	0	0	0	0	0	0	1	1	1	0	0	0	0	0	0	1	0.97	0.91	0.49	0	0	0	0	0.52	0.06	0	0.07	0.71	0.92	0	0	0	0	0	0.98	0	0	0	0
ZNF419_KRAB-A	1	0	0	0	0	0	0	0.97	0.98	0	0	0	0	0	0	0	0	0	0	0	0	0	0	0	0	1	0.39	0.9	0	0	0	0	0	0	0	0	0.01	0	0	0	0	0	0	0	1	0	0	0	0
ZNF331_KRAB-A	1	0	0	0	0	0	0	0.98	0	0	0	0	0	0	0	0	0	0.45	0	1	1	1	0	0	0	0	0.5	1	0	0	0	0	0	0	0	0	0	0.4	0.25	0	0	0	0	0	0	0	0	0	0
ZNF677_KRAB-A	1	0	0	0	0	0	0	0	0.95	0.98	0	0	0	0	0	0	0	0	0	0	0	0	1	1	1	1	1	1	1	0	0	0	0	0	0	0	0	0	0	0	0	0	0	0	0	0	0	0	0
ZNF273_KRAB-A	1	0	0	0	0	0	0	0.96	1	0	0	0	0	0	0	0	0.5	0	0	0	0.48	0	0	0	0	1	0.67	1	1	1	0	1	0.99	0.82	0	0	0.05	0	0	0	0	0	0	0	0	0	0	0	0
ZNF528_KRAB-A	1	0	0	0	0	0	0	0	0	0	0	0	0	0	0	0	0	0	0	0	0	0	0	0	0	0.5	0	0	0.5	0	1	0.5	0.5	0.49	0.1	0	0	0	0	0	0.5	0	0	0	0	0	0	0	0
ZBTB12_BTB	0	0	0	0	0	0	0	0	0	0	0	0	0	0	0	0	0	0	0	0	0	0	0	0	0	0	0.17	0	0	0	0	0	1	1	1	0.5	0	0	0	0.2	0	0	0	0	0	0	0	0	0
ZNF16_NONE	0	0	0	0	0	0	0	0.98	0	0	0	0	0.9	0	0	0	0	0.45	0	0	0	0	0	0	0	0.5	0.53	1	0	0	0	0.9	0	0.02	0	0	0	0	0	0	0	1	1	1	0.45	1	0	0	0
ZNF22_NONE	0	0.99	0	0	0	0	0	0	0	0	0	0.96	0	0	0	0	0	0	0	0	0	0	0	0	0	0	0	0.49	0	0	0	0	0	0.5	0	0	1	1	1	1	1	0.99	0.5	1	0	1	0.5	0.56	0
ZNF684_KRAB-A	0	0	0	0	0	0	0	0	0	0	0	0	0	0	0	0	0	0	0	0	0	0	0	0	0	0	0	0	0	0	0	0	0	0	0	0.93	0	0	0	0	0	1	1	1	1	1	1	1	1
ZSCAN22_SCAN	1	0	0	0	0	0	0	0	0.46	0	0	0	0	0	0	0	0.48	0	0	0	0	0	0	0	0	0.96	1	0	0	0	0	0	0.77	1	0.72	1	0	0.18	0	0	0	0	0	0	0	0	0	0.28	0.5
SNAI1_SNAG	0	0	0	0	0	0	0	0	0	0	0	0	0	0	0	0	0	0	0	0	0	0	0	0	0	0	0	0	0	0	0	0	0	0	0	0.35	0	0	0	0	0	0	0	0	0	0	0	0	0
ZNF213_KRAB-A;SCAN	0	0	0	0	0	0	0	0	0	0	0	0	0	0	0	0	0	0	0	0	0	0	0	0	0	0	0	0	0	0	0	0	0	0	0	0.69	0.1	0	0	0	0	0	0	0	0	0	0	0	0
ZNF675_KRAB-A	0	0	0	0	0	0	0	0.46	0	0	0	0	0.91	0	0	0	0.96	0.96	0	0	0	0	0	0	0	0	0	0	0	0	0	0	0	0.04	0	0.81	0.05	0.29	0	0	0	0	0	0	0	0	0	0	0
ZNF449_SCAN	0	0	0	0	0	0	0	0	0	0.25	0	0	0	0	0	0	0	0	0	0	0	0	0	0	0	0	0.8	0	0	0	0	0	0	0	0	0	0	0	0	0	0	0	0	0	0	0	0	0	0
ZSCAN16_SCAN	0	0	0	0	0	0	0	0	0	0	0	0	0	0	0	0	0	0	0	0	0	0	0	0	0	0	0.92	0	0	0	0	0	0.01	0.48	0	0	0	0	0	0	0	0	0	0	0	0	0	0	0
ZSCAN30_SCAN	0.11	0	0	0	0	0	0	0.41	0	0	0	0	0	0	0	0	0	0	0	0	0	0	0	0	0	0	0	0	0	0	0	0	0	0	0	0	0.05	0	0.19	0	0	0	0	0	0	0	0	0	0
ZNF18_KRAB-A;SCAN	0	0	0	0	0	0	0	1	0	0	0	0	0	0	0	0	0	0	0	0	0	0	0	0	0	0.91	0	0	0	0	0	0	0	0	0.01	0	0	0	0	0	0	0	0	0	0	0	0	0	0
MZF1_SCAN	1	0	0	0	0	0	0	0.9	0.98	0	0	0	0.97	0	0	0	0	0	0	0	0	0	0	0	0	1	0	0	0	0	0	0	0	0	0	0	0	0	0	0	0	0	0	0	0	0	0	0	0
ZNF263_KRAB-A;SCAN	0	0	0	0	0	0	0	0	0	0	0	0	0	0	0	0	0	0	0	0	0	0	0	0	0	0	0	0	0	0	0	0	0	0	0	0	0	0	0	0	0	0	0	0	0	0	0	0	0
ZNF189_KRAB-A	0.26	0	0	0	0	0	0	0.98	0	0	0	0	0	0.48	0	0	0	0	0	0	0	0	0	0	0	1	0.26	0	0	0	0	0	0	0.02	0.01	0	0	0	0	0	0	0	0	0	0	0	0	0	0
ZSCAN5C_SCAN	0	0	0	0	0	0	0	0	0	0	0	0	0	0	0	0	0	0	0	0	0	0	0	0	0	0	0	0	0	0	0	0	0	0	0	0.5	0.09	0.02	0	0	0	0	0	0	0	0	0	0	0
MYNN_BTB	0	0	0	0	0	0	0	0	0	0	0	0	0	0	0	0	0	0	0	0	0	0	0	0	0	0	0.04	0	0	0	0	0	0	0	0	0	0	0	0	0	0	0	0	0	0	0	0	0	0
SP2_NONE	0	0	0	0	0	0	0	0	0	0	0	0	0	0	0	0	0	0	0	0	0	0	0	0	0	0	0	0	0	0	0	0	0	0	0	0	0	0	0.17	0	0	0	0	0	0	0	0	0	0
ZNF76_NONE	0	0.46	0	0	0.49	0	0	0	0	0	0	0	0	0	0	0	0	0	0	0	0	0	0	0	0	0	0	0	0	0	0	0	0	0	0	0	0.36	0	0	0	0	0	0	0	0	0	0	0	0
ZNF768_NONE	0.68	1	0	0	0	0	0	1	0	0	0	0.5	0	0	0	0	1	0	0	0	0.45	0	0	0.95	0	1	0.93	0	0	0	0	0	0	0.02	0.01	0.68	0.44	0.6	0.79	0	0	0	0.5	0.5	1	0.99	0	0	0
ZFP82_KRAB-A	1	0.82	0	0	0	0	0	1	0.82	0	0	0	0.5	0.41	0	0	0.45	0	0	0	0	0	0	0.45	0	1	1	0.82	0	0	0	0.41	0.01	0.68	0.59	0.91	0.01	0.5	0.47	0	0	0	0	0	0	0	0	0	0
ZBTB26_BTB	0	0	0	0	0	0	0	0	0	0	0	0	0	0	0	0	0	0	0	0	0	0	0	0	0	0	1	0	0	0	0	0	0	0.37	0	0	0.07	0	0.17	0	0	0	0	0	0	0	0	0	0
KLF7_NONE	0	0.5	0	0	0	0	0	0	0	0	0	0	0	0	0	0	0	0	0	0	0	0	0	0	0	0	0.9	0	0	0	0	0	0	0	0	0.5	0	0	0	0	0	0	0	0	0	0	0	0	0
ZNF436_KRAB-A	0.5	0.48	0	0	0	0	0	0	0	0	0	0	0	0	0	0	0.45	0	0	0	0	0	0	0	0	0	0	0	0	0	0	0	0	0	0	0.25	0	0	0.31	0	0	0	0	0	0	0	0	0	0
ZNF524_NONE	0	0	0	0	0	0	0.98	0	0	0	0	0	0.46	0	0	0	0	0	0	0	0	0	0	0	0	0	0.17	0	0	0	0	0	0	0	0	0.35	0	0.05	0.59	0	0	0	0	0	0	0	0	0	0
PATZ1_BTB	0	0	0	0	0	0	0	0.41	0	0	0	0	0	0	0	0	0	0	0	0	0	0	0	0	0	0	0	0	0	0	0	0	0	0	0	0	0	0.07	0.16	0	0	0	0	0	0	0	0	0	0
GTF3A_NONE	0	0	0	0	0	0	0	0	0	0	0	0	0	0	0	0	0	0	0	0	0	0	0	0	0	0.45	0.1	0.41	0	0	0	0	0	0	0	0.25	0.03	0.05	0.82	0	0	0	0	0.45	0	0	0	0	0
ZBTB6_BTB	0	0	0	0	0	0	0	0	0	0	0	0	0	0	0	0	0	0	0	0	0	0	0	0	0	0	0.49	0.41	0	0	0	0	0	0	0	0	0	0	0	0	0	0	0	0	0	0	0	0	0
ZNF136_KRAB-A	1	0	0	0	0	0	0	0	0.5	0	0	0	0	0	0	0	0	0	0	0	0	0	0	0	0	1	0	0	0.49	0	0	0	0.19	0.13	0	0	0.12	0.51	0.17	0	0.98	0	0	0	0	0	0	0	0
ZNF317_KRAB-A	0	0	0	0	0	0	0	0.49	0	0	0	0	0	0	0	0	0	0	0	0	0	0	0	0	0	0	1	0	0	0	0	0	0	0	0	0	0	0	0.51	0	0	0	0	0	1	0	0	0	0
ZNF574_NONE	0.98	0.46	0	0	0	0	0	0	0.49	0.35	0	0	0	0	0	0.28	0	0	0	0	0.48	0	0	0	0	0.48	0.5	0	0	0	0	0	0	0.26	0	0	0.91	0.05	0.43	0	0	0	0	0	1	0	0	0	0
ZNF547_KRAB-A	1	0	0	0	0	0	0.45	0	0.98	0	0	0	0	0	0	0	0	0	0	0	0	0	0	0	0	0.45	0.16	0	0	0	0	0	0	0	0	0	0.34	0.07	0	0	0	0	0	0	0	0	0	0	0
ZNF708_KRAB-A	1	0.9	0	0	0	0	0	0.5	1	0	0	0.41	0	0	0	0	0	0	0	0	0	0	0	0	0	0	0.47	1	0	0	0	0	0	0.35	0.75	0.5	0.48	0.84	0.63	0	0	0	0	0	0	0	0	0	0
ZFP64_NONE	0	0	0	0	0	0	0	0	0	0	0	0	0	0	0	0	0	0	0	0	0	0	0	0	0	0.96	0	0.49	0	0	0	0	0	0	0	0	0.05	0	0.34	0	0	0	0	0	0	0	0	0	0
ZSCAN31_SCAN	0	0	0	0	0	0	0	0.46	0	0	0	0	0	0	0	0	0	0	0	0	0	0	0	0	0	0	0	0	0	0	0	0	0	0	0	0	0.05	0	0	0	0	0	0	0	0	0	0	0	0
FEZF1_NONE	0.51	0	0	0	0	0	0	1	0	0	0	0	0	0	0	0	0	0	0	0	0	0	0	0	0	0	1	0	0.48	0	0	0	0	0.09	0	0.85	0.91	0.58	0.73	0	0	0	0	0	0	0	0	0	0
ZNF280A_NONE	0	0	0	0	0	0	0	0	0	0	0	0	0	0	0	0	0	0	0	0	0	0	0	0	0	0	0	0	0	0	0	0	0	0	0	0	0	0	0	0	0	0	0	0	0	0	0	0	0
KLF15_NONE	0	0.46	0.5	0	0	0	0	0	0	0	0	0	0.49	0	1	0	0	0	0	0	0	0	0	0	0	0.5	1	0	0	0	0	0	0	0	0	0	0	0	0.26	0	0	0	0	0	0	0	0	0	0
ZNF784_NONE	0	0	0	0	0	0	0.48	0	0	0.84	0	0	0	0	0	0	0	0	0	0	0	0	0	0	0	0	0	0	0	0	0	0	0	0.04	0	0	0.02	0.39	0	0	0	0	0	0	0	0	0	0	0
ZBTB42_BTB	0	0.41	0	0	0	0	0	0.41	0	0	0	0	0	0	0.45	0	0	0	0	0	0	0	0	0	0	0	0.99	0	0	0	0	0.41	0	0.02	0.01	0.25	0	0	0	0	0	0	0	0	0	0	0	0	0
KLF12_NONE	0	0	0	0	0	0	0	0	0	0	0	0	0	0	0	0	0	0	0	0	0	0.95	0	0	0	0	0	0	0	0	0	0	0	0	0	0.35	0	0	0	0	0	0	0	0	0	0	0	0	0
ZBTB18_BTB	0	0	0	0	0	0	0	0	0	0	0	0	0	0	1	0	0	0	0	0	0	0	0	0	0	0	0	0	0	0	0	0	0	0	0	0	0	0	0	0	0	0	0	0	0	0	0	0	0
ZBTB48_BTB	0	0.95	0	0	0	0	0.96	0.46	0	0	0	0	0	0	0	0	0	0	0	0	0	0.46	0	0	0	0.5	0.5	0	0	0	0	0	0	0.39	0	0	0.68	0.24	0.26	0	0	0	0	0	0	0	0	0	0
ZFP42_NONE	0.5	0	0	0	0	0	0	0	0	0	0	0	0	0	0	0	0	0	0	0	0	0	0	0	0	0	0.34	0	0	0	0	0	0	0.04	0	0	0.28	0	0	0	0	0	0	0	0	0	0	0	0
PRDM1_SET	0	0	0	0	0	0	0	0	0	0	0	0	0	0	0	0	0	0	0	0	0	0	0	0	0	0	0	0	0	0	0	0	0	0	0	0.98	0.48	0	0.09	0	0	0	0	0	0	0	0	0	0
GLI4_NONE	0	0.49	0	0	0	0	0	0	0	0	0	0.46	0	0	0	0	0	0	0	0	0	0	0	0	0	1	0	0	0	0	0	0	0	0	0	0.69	0.39	0.1	0.51	0	0	0	0	0.98	1	1	0	0	0
KLF1_NONE	0.36	0	0	0	0	0	0	0	0	0	0	0	0	0	0	0	0	0	0	0	0	0	0	0	0	0	0	0	0	0	0	0	0	0	0	0	0.01	0.15	0	0	0	0	0	0	0	0	0	0	0
EGR3_NONE	0	0	0	0	0	0	0	0	0	0	0	0	0	0	0	0	0	0	0	0	0	0	0	0	0	0	0	0	0	0	0	0	0	0.04	0	0.35	0.47	0.05	0.26	0	0	0	0	0	0	0	0	0	0
EGR2_NONE	0	0	0	0	0	0	0	0	0	0	0	0.46	0	0	0	0	0	0	0	0	0.5	0	0	0	0	0	0	0	0	0	0	0	0	0	0	0	0	0.24	0.17	0	0	0	0	0	0	0	0	0	0
ZNF467_NONE	1	0	0	0	0	0	0	0	0	0.49	0	0	0	0	0	0	0.5	0.48	0	0	0	0	0	0	0.48	0.5	0.26	0	0	0	0	0	0	0	0	0.35	0.94	0	0.26	0	0	0	0.81	0.5	1	0.46	0	0	0
MAZ_NONE	1	0	0	0	0	0	0.95	0	0	0	0	0	0	0	0	0	0	0	0	0	0	0	0	0	0	0	0	0	0.5	0	0	0	0	0	0	0.25	0.83	0.07	0.58	0	0	0	0	0	0	0	0	0	0
ZNF85_KRAB	0	0	0	0	0	0	0	0.46	0	0	0	0	0	0	0	0	0.5	0	0	0	0	0	0	0	0	0	0.33	1	0	0	0	0	0	0	0	0.46	0.24	0	0.26	0	0	0	0	0	0.96	0	0	0	0
ZNF594_NONE	0	0	0	0	0	0	0	0.41	0	0	0	0	0	0	0	0	0	0	0	0	0	0	0	0	0	0	0	0	0	0	0	0	0	0.02	0.01	0.25	0.98	0.07	0	0	0	0	0	0	0	0	0	0	0
ZNF322_NONE	0.24	0	0	0	0	0	0.45	0	0	0	0	0	0	0	0	0	0	0	0	0	0	0	0	0	0	0	0	0	0	0	0	0	0	0	0	0	0	0	0	0	0	0	0	0	0	0	0	0	0
ZNF490_KRAB-A	1	0	0	0	0	0	0	0.98	0.9	0	0	0	0.41	0	0	0	0	0	0	0	0	0	0	0	0	1	0.26	0	0	0	0	0.48	0	0	0	0	0.38	0	0.25	0	0	0	0	0	1	0	0	0	0
GLIS1_NONE	0	0	0	0	0	0	0.91	0	0	0	0	0	0	0	0.5	0	0	0	0	0	0	0	0	0	0	0	0	0	0	0	0	0	0	0	0	0	0	0	0	0	0	0	0	0	0	0	0	0	0
OSR2_NONE	0	0.41	0	0	0	0	0	0	0	0	0	0	0	0	0	0	0	0	0	0	0	0	0	0	0	0	0	0	0	0	0	0	0	0	0	0.25	0	0.22	0	0	0	0	0	0	0	0	0	0	0
ZNF610_KRAB-A	1	0	0	0	0	0	0	0.91	0	0	0	0.82	0	0	0	0	0	0	0	0	0	0	0	0	0	0	0.79	0	0	0	0	0	0	0	0	0	0	0	0	0	0	0	0	0	0	0	0	0	0
ZNF770_NONE	0	0	0	0	0	0	0	0	0	0	0	0	0	0	0	0	0	0	0	0	0	0	0	0.45	0	0	0.91	0.82	0	0	0	0.91	0	0.04	0	0.25	0	0.02	0	0	0	0	0	0	0	0	0	0	0
ZNF667_KRAB-A	0.5	0	0	0	0	0	0	1	0	0	0	0	0.98	0	0.95	0	0	0	0	0	0	0	0	0	0	0.45	1	0.41	0.48	0	0	1	0	0	0	0	0	0	0	0	0	0	0	0	0.95	0	0	0	0
ZFP28_KRAB-A	1	0	0	0	0	0	0	0.9	0.48	0	0	0	0.98	0	0	0	0	0	0	0	0	0	0	0	0	0.5	0	0.98	1	0	0	0	0	0	0	0	0	0	0	0	0	0	0	0	0.45	0	0	0	0
ZNF816_KRAB-A	1	0	0	0	0	0	0	1	0.41	0	0	0	0.5	0	0	0	0	0	0	0	0	0	0	0	0	0.5	0.1	0.9	0.5	0	0	0	0	0.02	0	0	0	0	0	0	0	0	0	0	0	0	0	0	0
ZNF778_KRAB-A	0.63	0	0	0	0	0	0	0.98	0.41	0	0	0	0.9	0.41	0	0	0	0	0	0	0	0	0	0	0	0	0.1	0	0	0	0	0	0	0	0	0	0	0	0	0	0	0	0	0	0	0	0	0	0
ZNF418_KRAB-A	1	0	0	0	0	0	0	0.48	0.41	0	0	0	0.97	0.91	0	0	0	0	0	0	0	0	0	0	0	0.45	0	0.91	0	0	0	0	0	0	0	0	0	0	0	0	0	0.41	0.42	0.95	0	0.97	0	0	0
ZNF549_KRAB-A	1	0	0	0	0	0	0	0.41	0.41	0	0	0	0	0	0	0	0	0	0	0	0	0	0	0	0	0	0	0	0	0	0	0	0	0	0	0	0	0	0	0	0	0	0	0	0	0	0	0	0
ZNF214_KRAB-A	0.99	0	0	0	0	0	0	0.5	0	0	0	0	0	0	0	0	0	0	0	0	0	0	0	0	0	0	0.53	0.41	0	0	0	0	0	0	0	0	0	0	0	0	0	0	0	0	0	0	0	0.46	0
SCRT1_SNAG	0	0	0	0	0	0	0	0	0	0	0	0	0	0	0	0	0	0	0	0	0	0	0	0	0	0	0	0	0	0	0	0	0	0	0	0	0.09	0.02	0.55	0	0	0	0	0	0	0	0	0	0
KLF14_NONE	0	0.46	0	0	0	0	0	0	0	0	0	0	0	0	0	0	0	0	0	0	0	0	0	0	0	0	0	0	0	0	0	0	0	0	0	0	0.35	0	0	0	0	0	0	0	0	0	0	0	0
ZNF595_KRAB-A	1	0	0	0	0	0	0	0.98	0	0	0	0	0	0	0	0	0	0	0	0	0	0	0	0	0	0	0.26	0.9	0	0	0	0	0	0	0	0	0	0	0	0	0	0	0	0	0	0	0	0	0
ZNF320_KRAB-A	1	0	0	0	0	0	0	0	0	0	0	0.41	0	0	0	0	0	0	0	0	0	0	0	0	0	1	0.26	0	0	0	0	0	0	0	0.01	0.25	0	0	0	0	0	0	0	0	0	0	0	0	0
ZFP3_NONE	0.02	0	0	0	0	0	0	0	0	0	0	0	0	0	0	0	0	0	0	0	0	0	0	0	0	0	0	0	0	0	0	0	0	0	0	0	0	0	0	0	0	0	0	0	0	0	0	0	0
IKZF3_NONE	0.01	0	0	0	0	0	0	0	0	0	0	0	0	0	0	0	0	0	0	0	0	0	0	0	0	0	0	0	0	0	0	0	0	0	0.01	0	0.14	0	0	0	0	0	0	0	0	0	0	0	0
ZNF71_NONE	0.13	0.41	0	0	0	0	0	0.98	0.48	0	0	0	0.97	0	0	0	0	0	0	0	0	0	0	0.45	0	0	0	0	0	0	0	0	0	0.02	0	0	0.14	0.14	0.09	0	0	0	0.25	1	0	0.5	0	0	0
ZBTB14_BTB	0	0.41	0	0	0	0	0	0	0	0	0	0	0	0	0	0	0	0	0	0	0	0	0.45	0	0	0	0	0	0	0	0	0	0	0	0	0	0	0	0	0	0	0	0	0	0	0	0	0	0
ZNF250_KRAB-A	1	0	0	0	0	0	0	0	0	0	0	0	0	0	0	0	0	0	0	0	0	0	0	0	0	0	0	0	0	0	0	0	0	0	0	0	0	0	0.09	0	0	0	0	0	0	0	0	0	0
YY1_NONE	0	0	0	0	0	0	0	0	0	0	0	0	0	0	0	0	0	0	0	0	0	0	0	0	0	0	0	0	0	0	0	0	0	0	0	0	0	0	0	0	0	0	0	0	0	0	0	0	0
KLF10_NONE	0	0	0	0	0	0	0	0	0	0	0	0	0	0	0	0	0	0	0	0	0	0	0	0	0	0	0	0	0	0	0	0	0	0	0	0	0	0	0	0	0	0	0	0	0	0	0	0	0
ZNF281_NONE	0	0	0	0	0	0	0	0	0	0.35	0	0	0	0	0	0	0	0	0	0	0	0	0	0	0	0	0	0	0	0	0	0	0.02	0.13	0	0	0	0.13	0.17	0	0	0	0	0	0	0	0	0	0
ZNF329_NONE	0	0	0	0	0	0	0	0.48	0	0	0	0	0	0	0	0	0	0	0	0	0	0	0	0	0	0	0	0	0	0	0	0	0.01	0	0	0	0	0	0.09	0	0	0	0	0	0	0	0	0	0
ZNF184_KRAB-A	0.02	0	0	0	0	0	0	0.98	0	0	0	0	0	0	0	0	0	0	0	0	0	0	0	0	0	0.45	0	0	0	0	0	0	0	0	0	0	0	0	0	0	0	0	0	0	0	0.41	0	0	0
ZNF140_KRAB-A	1	0	0	0	0	0	0	0	0	0	0	0	0	0	0	0	0	0	0	0	0	0	0	0	0	0	0.33	0.82	0	0	0	0	0	0	0	0	0	0	0.09	0	0	0	0	0	0	0	0	0	0
ZNF257_KRAB-A	0.52	0	0	0	0	0	0	0.41	0	0	0	0	0	0	0	0	0	0	0	0	0	0	0	0	0	0	0.46	0	0.41	0	0	0	0.01	0	0	0	0	0	0	0	0	0	0	0	0	0	0	0	0
ZNF34_KRAB-A	0.02	0	0	0	0	0	0	0	0	0	0	0	0	0	0	0	0.95	0	0	0	0	0	0	0	0	0	0.6	0.41	0	0	0	0	0	0	0	0	0	0	0	0	0	0	0	0	0	0	0	0	0
ZNF394_KRAB-A;SCAN	0	0	0	0	0	0	0	0	0	0	0	0	0	0	0	0	0	0	0	0	0	0	0	0	0	0	0	0	0	0	0	0	0	0	0	0	0	0.02	0	0	0	0	0	0	0	0	0	0	0
ZNF596_KRAB-A	1	0	0	0	0	0	0	0	0.48	0	0	0	0	0	0	0	0	0	0	0	0	0	0	0	0	0.45	0	0.91	0	0	0	0	0	0	0	0	0	0.02	0	0	0	0	0	0	0	0	0	0	0
ZNF200_NONE	0	0	0	0	0	0	0	0	0	0	0	0	0	0	0	0	0	0	0	0	0	0	0	0	0	0	0	0	0	0	0	0	0	0	0	0	0	0	0	0	0	0	0	0	0	0	0	0	0
ZNF134_NONE	0.01	0	0	0	0	0	0	0.5	0	0.35	0	0	0	0	0	0	0	0	0	0	0	0	0	0	0	0	0	0	0	0	0	0	0	0	0	0.81	0	0	0	0	0	0	0	0	0	0	0	0	0
ZNF98_KRAB-A	0	0	0	0	0	0	0	0	0	1	0	0	0	0	0	0	0	0	0	0	0	0	0	0	0	0	0.17	1	0	0	0	0	0	0	0	0.81	0	0	0	0	0	0	0	0	0	0	0	0	0
ZNF513_NONE	0.5	0	0.45	0	0	0	0	0.97	0	0	0	0.41	0	0	0	0	0	0	0	0	0.5	0	0	0	0	0	0.16	0	0	0	0	0	0	0	0	0	0	0	0	0	0	0	0	0	0	0	0	0	0
ZNF35_NONE	0	0	0	0	0	0	0	0	0	0	0	0	0	0	0	0	0	0	0	0	0	0	0	0	0	0	0	0	0	0	0	0	0	0	0	0	0	0	0	0	0	0	0	0	0	0	0	0	0
ZNF341_NONE	0	0	0	0	0	0	0	0	0	0	0	0	0	0	0	0	0.5	0	0	0	0.48	0	0	0	0	0.48	0	0	0	0	0	1	0	0	0	0	0	0.13	0	0	0	0	0	0	0	0	0	0	0
[truncated: 178 more columns]
