# Supplementary material for: Multiparameter functional diversity of human C2H2 zinc finger proteins
Source: Genome Res. 2016 Dec;26(12):1742–52. doi: 10.1101/gr.209643.116 (PMC5131825; doi:10.1101/gr.209643.116)
Supplement: Supplemental Material [file supp_gr.209643.116_Supplemental_Table_S9.xlsx]

## Sheet: Legend
Supplemetal Table S9 (related to Figure 5): Data underlying Supplemental Figure S4. Raw TRIM28 spectral counts for each replicate for each bait, raw spectral counts of each for each bait's own purification, and the total number of significant (AvgP=1) interactions for each bait.

## Sheet: KRAB
Bait	Effector Domain	Rep1 TRIM28 SPC	Rep2 TRIM28 SPC	Self-Retrival	Total Significant Interactions
ZIM3	KRAB	1100	920	407	3
ZNF669	KRAB	858	777	199	8
ZNF8	KRAB	672	766	967	2
ZNF350	KRAB	531	651	321	2
ZNF331	KRAB	598	513	222	7
ZNF419	KRAB	550	546	233	7
ZNF582	KRAB	536	492	395	1
ZNF454	KRAB	355	400	535	7
ZNF554	KRAB	348	343	308	1
ZNF547	KRAB	364	285	257	6
ZNF136	KRAB	298	296	119	4
ZNF708	KRAB	218	295	152	13
ZNF354A	KRAB	260	250	157	1
ZNF382	KRAB	267	240	347	2
ZNF324	KRAB	236	259	98	1
ZNF37A	KRAB	197	253	179	3
ZNF30	KRAB	198	248	288	6
ZNF563	KRAB	227	197	164	5
ZNF45	KRAB	224	188	318	4
ZFP82	KRAB	172	230	190	17
ZNF595	KRAB	161	187	71	4
ZNF320	KRAB	167	177	282	6
ZNF224	KRAB	159	131	214	7
ZNF596	KRAB	103	159	75	1
ZNF33A	KRAB	132	120	172	3
ZNF490	KRAB	114	124	154	5
ZNF175	KRAB	164	49	69	1
ZNF677	KRAB	98	108	288	9
ZNF816	KRAB	79	107	85	4
ZFP28	KRAB	82	98	155	4
ZNF528	KRAB	103	65	178	2
ZNF250	KRAB	67	82	600	3
ZNF264	KRAB	68	58	647	4
ZNF549	KRAB	59	62	49	1
ZNF140	KRAB	65	51	52	1
ZNF610	KRAB	63	48	55	2
ZNF273	KRAB	57	40	177	13
ZNF418	KRAB	46	42	70	2
ZNF214	KRAB	51	36	37	0
ZNF436	KRAB	62	21	317	1
ZNF778	KRAB	40	31	99	1
ZNF667	KRAB	47	23	107	7
ZNF257	KRAB	29	37	96	0
ZNF189	KRAB	29	32	159	3
ZNF34	KRAB	15	29	87	1
ZNF184	KRAB	29	11	44	0
ZNF85	KRAB	18	15	175	5
ZNF98	KRAB	15	14	121	3
ZNF263	KRAB	11	16	261	2
ZNF675	KRAB	14	12	225	10
ZNF18	KRAB	10	15	595	5
ZNF213	KRAB	7	12	681	5
ZNF317	KRAB	10	6	175	9
ZNF394	KRAB	6	2	122	0
ZNF684	KRAB	5	1	123	18

## Sheet: non-KRAB
Bait	Effector Domain	Rep1 TRIM28 SPC	Rep2 TRIM28 SPC	Self-Retrieval	Total Significant Interactions
ZNF502	NONE	235	235	146	4
ZNF692	NONE	141	111	923	4
ZNF513	NONE	19	125	174	0
MZF1	SCAN	66	72	490	8
ZNF121	NONE	48	68	382	9
ZSCAN22	SCAN	44	49	421	29
ZNF146	NONE	40	44	180	4
ZNF467	NONE	47	36	617	13
MAZ	NONE	41	41	341	2
FEZF1	NONE	45	28	331	14
ZNF574	NONE	35	35	560	7
ZNF768	NONE	32	34	192	22
ZFP42	NONE	41	24	234	5
ZSCAN30	SCAN	30	30	530	4
ZNF71	NONE	25	31	369	7
IKZF3	NONE	28	26	516	0
ZNF322	NONE	21	32	28	6
KLF7	NONE	24	27	541	1
ZNF35	NONE	21	26	427	0
ZNF134	NONE	20	27	143	0
ZNF329	NONE	21	25	537	0
ZFP3	NONE	29	17	461	0
KLF1	NONE	33	11	383	1
GLIS1	NONE	21	22	707	3
ZNF594	NONE	27	14	384	1
ZBTB48	BTB	20	17	613	10
ZNF770	NONE	19	16	70	1
ZNF281	NONE	26	6	690	0
ZNF76	NONE	15	16	927	4
ZNF200	NONE	15	11	229	2
ZNF16	NONE	16	10	139	6
ZBTB42	BTB	13	11	144	7
ZSCAN5C	SCAN	10	14	385	7
ZBTB14	BTB	12	10	1280	2
ZNF449	SCAN	12	9	344	3
OSR2	NONE	12	9	300	7
ZNF784	NONE	9	12	848	3
MYNN	BTB	10	10	926	7
KLF15	NONE	8	12	264	5
ZNF524	NONE	10	10	221	7
ZSCAN16	SCAN	9	11	241	6
ZSCAN31	SCAN	8	11	139	5
PATZ1	BTB	3	14	1117	0
ZBTB6	BTB	14	2	179	1
ZNF341	NONE	6	10	362	3
GLI4	NONE	6	8	571	11
SCRT1	SNAG	9	4	769	3
ZNF280A	NONE	5	6	610	3
KLF12	NONE	4	7	322	7
ZBTB12	BTB	7	3	467	4
EGR3	NONE	4	6	264	3
PRDM1	SET	2	8	851	3
ZFP64	NONE	6	3	774	12
GTF3A	NONE	3	6	563	10
SNAI1	SNAG	5	3	143	4
ZNF22	NONE	4	3	122	17
ZBTB18	BTB	2	2	952	5
ZBTB26	BTB	2	2	876	5
KLF14	NONE	1	2	482	3
SP2	NONE	2	1	579	4
EGR2	NONE	0	1	380	10
