# Supplementary material for: Multiparameter functional diversity of human C2H2 zinc finger proteins
Source: Genome Res. 2016 Dec;26(12):1742–52. doi: 10.1101/gr.209643.116 (PMC5131825; doi:10.1101/gr.209643.116)
Supplement: Supplemental Material [file supp_gr.209643.116_Supplemental_Table_S10.xlsx]

## Sheet: Legend
Supplemental Table S10 (related to Figure 6): Hand-curated table of all 227 prey proteins and their functions. Functions of prey proteins in transcription activation and/or repression. Publications supporting a role in activation or repression of transcription are listed as PubMed IDs in columns E and F respectively. A functional tag was also assigned to each prey protein as described in Methods.…

## Sheet: Sheet1
Prey Protein	Description	Uniprot ID	Tag	Role in transcription	Papers that support a role in transcription activation	Papers that support a role in transcription repression
TSPYL2	Testis-specific Y-encoded-like protein 2	Q9H2G4	Chromatin Remodeler	Activator	21738728
DDX50	ATP-dependent RNA helicase DDX50	Q9BQ39	Helicase_RNA Related	Activator	11823437
SCAND1	SCAN domain-containing protein 1	P57086	Other/Unknown	Activator	12444922
TP73	Tumor protein p73	O15350	Transcription Factor	Activator	19509292
HCFC1	Host cell factor 1	P51610	Adaptor/Scaffold	Activator	19682612*
FTO	Alpha-ketoglutarate-dependent dioxygenase FTO	Q9C0B1	RNA Related	Activator	20858458
CCAR2	Cell cycle and apoptosis regulator protein 2	Q8N163	Other/Unknown	Activator	21596782
CREBBP	CREB-binding protein	Q92793	Protein Modifier	Activator	23307074*
EP300	Histone acetyltransferase p300	Q09472	Protein Modifier	Activator	23307074*
TOP2B	DNA topoisomerase 2-beta	Q02880	Other/Unknown	Activator	23995680
SART3	Squamous cell carcinoma antigen recognized by T-cells 3	Q15020	RNA Related	Activator	24526689
RPRD1B	Regulation of nuclear pre-mRNA domain-containing protein 1B	Q9NQG5	GTF	Activator	24982424
NUCKS1	Nuclear ubiquitous casein and cyclin-dependent kinase substrate 1	Q9H1E3	Other/Unknown	Activator	25116364
UBTF	Nucleolar transcription factor 1	P17480	RNA Related	Activator	25452314
PSMC3	26S protease regulatory subunit 6A	P17980	Other/Unknown	Activator	11463857;19325002;19555666
TXK	Tyrosine-protein kinase TXK	P42681	Protein Modifier	Activator	11859127;17177976
CASK	Peripheral plasma membrane protein CASK	O14936	Protein Modifier_Adaptor/Scaffold	Activator	15584924;15066269
ACTR8	Actin-related protein 8	Q9H981	Chromatin Remodeler_Adaptor/Scaffold	Activator	16230350(Member of INO80 complex)
NFRKB	Nuclear factor related to kappa-B-binding protein	Q6P4R8	Chromatin Remodeler_Transcription Factor	Activator	16230350(Member of INO80 complex)
C1QBP	Complement component 1 Q subcomponent-binding protein, mitochondrial	Q07021	RNA Related	Activator	18676636;16641292;15243141
UCHL5	Ubiquitin carboxyl-terminal hydrolase isozyme L5	Q9Y5K5	Protein Modifier_Chromatin Remodeler	Activator	18922472(Part of INO80 complex)
HMGN2	Non-histone chromosomal protein HMG-17	P05204	Other/Unknown	Activator	21816901;7649479;7729423;8404854
TP53BP1	Tumor suppressor p53-binding protein 1	Q12888	DNA Replication/Repair	Activator	21914189;9748285
CARM1	Histone-arginine methyltransferase CARM1	Q86X55	Protein Modifier	Activator	22451921;19769987;18413343;18188184;16938873;16938873;15616592;15186775;12498683;12351636;11747826;11341840;10381882
CAMK2D	Calcium/calmodulin-dependent protein kinase type II subunit delta	Q13557	Protein Modifier	Activator	25421395;12692905
CTNNB1	Catenin beta-1	P35222	Signalling	Activator	25747274*
PSMC5	26S protease regulatory subunit 8	P62195	Adaptor/Scaffold	Activator	7870181;12110588;17224908;18215421;18662994;19660582;22771340;24625964
RRP1B	Ribosomal RNA processing protein 1 homolog B	Q14684	RNA Related	Repressor		25092915
AKAP8L	A-kinase anchor protein 8-like	Q9ULX6	Helicase_RNA Related	Repressor		11884601
ZNF446	Zinc finger protein 446	Q9NWS9	Transcription Factor	Repressor		15936718
DCAF7	DDB1- and CUL4-associated factor 7	P61962	Adaptor/Scaffold	Repressor		16887337
ZMYM2	Zinc finger MYM-type protein 2	Q9UBW7	Other/Unknown	Repressor		18806873
RFC1	Replication factor C subunit 1	P35251	DNA Replication/Repair	Repressor		20639449
TRIM28	Transcription intermediary factor 1-beta	Q13263	Adaptor/Scaffold	Repressor		21652716*
ZRANB2	Zinc finger Ran-binding domain-containing protein 2	O95218	RNA Related	Repressor		22021003
RCOR3	REST corepressor 3	Q9P2K3	Other/Unknown	Repressor		24820421
CUL3	Cullin-3	Q13618	Adaptor/Scaffold	Repressor		24863065
RCOR1	REST corepressor 1	Q9UKL0	Transcription Factor	Repressor		10449787;11171972;12399542;16885027;18075316;18657505;18854179;19394292;20080105;24652990
IRF2BP2	Interferon regulatory factor 2-binding protein 2	Q7Z5L9	Other/Unknown	Repressor		12799427;20702774;21444724;21576369
DDX20	Probable ATP-dependent RNA helicase DDX20	Q9UHI6	Helicase_RNA Related	Repressor		14699164;11145740;12482992
Q96T88	E3 ubiquitin-protein ligase UHRF1	Q96T88	Protein Modifier_DNA Methylation	Repressor		17519354;21777816;20037778;19943104
HDGF	Hepatoma-derived growth factor	P51858	Transcription Factor	Repressor		17974029;19162039
NACC1	Nucleus accumbens-associated protein 1	Q96RE7	Adaptor/Scaffold	Repressor		19121354;17804717;17254023;16115196;16033423
AES	Amino-terminal enhancer of split	Q08117	Other/Unknown	Repressor		20163360;19460168;11416139;10660609
CCDC6	Coiled-coil domain-containing protein 6	Q16204	Adaptor/Scaffold	Repressor		20498639;23145146
IRF2BP1	Interferon regulatory factor 2-binding protein 1	Q8IU81	Protein Modifier	Repressor		21444724;18671972;12799427
Q9H6W3	Bifunctional lysine-specific demethylase and histidyl-hydroxylase NO66	Q9H6W3	Protein Modifier	Repressor		24115157;23620590;19927124
BAZ1A	Bromodomain adjacent to zinc finger domain protein 1A	Q9NRL2	Other/Unknown	Repressor		24244200;17519354
BACH1	Transcription regulator protein BACH1	O14867	Transcription Factor	Activator AND Repressor	8887638	26123998;25344725;21555518;19608619;19119918;19011633;18325350;17901053;17257585;17942419;17065227;16824198;16530877;15855052;15734732;15613547;15465821;14660636;14747657;12511571;12356737;11387216;10620011;8887638
AHCTF1	Protein ELYS	Q8WYP5	Transcription Factor	Activator AND Repressor	11952839	11952839
CDC73	Parafibromin	Q6P1J9	GTF	Activator AND Repressor	14710186	21873510
LEO1	RNA polymerase-associated protein LEO1	Q8WVC0	GTF	Activator AND Repressor	14710186	21873510
IRF2BPL	Interferon regulatory factor 2-binding protein-like	Q9H1B7	Other/Unknown	Activator AND Repressor	17627301	21444724;17627301
ZNF131	Zinc finger protein 131	P52739	Transcription Factor	Activator AND Repressor	20303951	18847501;22467880;23159625
ZNF217	Zinc finger protein 217	O75362	Transcription Factor	Activator AND Repressor	20661224	17130829
PAWR	PRKC apoptosis WT1 regulator protein	Q96IZ0	Other/Unknown	Activator AND Repressor	21282189	19801652
TLE3	Transducin-like enhancer protein	Q04726	Adaptor/Scaffold	Activator AND Repressor	21459326	25223786;24024827;23473036;22434868;21459326;20181723
TLE1	Transducin-like enhancer protein 1	Q04724	Adaptor/Scaffold	Activator AND Repressor	21536917	25446087;24596249;24024827;20181723
CTBP2	C-terminal-binding protein 2	P56545	Adaptor/Scaffold	Activator AND Repressor	23264848	25228645;25944056;25659434;10567582
HDAC1	Histone deacetylase 1	Q13547	Protein Modifier	Activator AND Repressor	24170248*	24170248*
HDAC2	Histone deacetylase 2	Q92769	Protein Modifier	Activator AND Repressor	24170248*	24170248*
PML	Protein PML	P29590	Adaptor/Scaffold	Activator AND Repressor	26539288*	26539288*
CTR9	RNA polymerase-associated protein CTR9 homolog	Q6PD62	GTF	Activator AND Repressor	10219085;17911113;18194564;26494790	21873510;24420920
FHL3	Four and a half LIM domains protein 3	Q13643	Other/Unknown	Activator AND Repressor	11046156;17363903	12556451;15453830;22219185
PELP1	Proline-, glutamic acid- and leucine-rich protein 1	Q8IZL8	Adaptor/Scaffold_Signalling	Activator AND Repressor	11481323;14963108;15374949;15579769;15994929;16574651;17192406;17505058;19800002;22086908;22403175;23486015	15456770;18682536
PAF1	RNA polymerase II-associated factor 1 homolog	Q8N7H5	GTF	Activator AND Repressor	11884586;12395202;12455700;12665580;14710186;15632065;16354696;18194564;20178742;24600005;26518661	12667454;16582434;21498644;21873510; 22252319
KLF7	Krueppel-like factor 7	O75840	Transcription Factor	Activator AND Repressor	14729953;16339272;17123745;17553693;21093432;21093432	16339272
TRIM27	Zinc finger protein RFP	P14373	Protein Modifier_Adaptor/Scaffold	Activator AND Repressor	16945332	17049487;16393995;16007160
CTBP1	C-terminal-binding protein 1	Q13363	Adaptor/Scaffold	Activator AND Repressor	17662696;17336131	25228645;23303449;21681822;20711239;19751731;19188451;17336131;16326862;10567582
ZKSCAN3	Zinc finger protein with KRAB and SCAN domains 3	Q9BRR0	Transcription Factor	Activator AND Repressor	18940803;21057542	18940803;23434374
ZNF24	Zinc finger protein 24	P17028	Transcription Factor	Activator AND Repressor	22213192;19463170	20510677;19463170;17875714
CHD4	Chromodomain-helicase-DNA-binding protein 4	Q14839	Helicase_Chromatin Remodeler	Activator AND Repressor	24440720;23471993	24440720;23708667;23071088;22215588;19549820;16574654;9885572
INO80	DNA helicase INO80	Q9ULG1	Helicase_Chromatin Remodeler	Activator AND Repressor	24792115;18593569;17721549	25691465
TRIP6	Thyroid receptor-interacting protein 6	Q15654	Adaptor/Scaffold	Activator AND Repressor	25044744;24819052;20153803;16624523;15489293;11336797;10794523	24819052;20153803;15489293
KDM1A	Lysine-specific histone demethylase 1A	O60341	Protein Modifier	Activator AND Repressor	25684206;24732800;18187655;16079795	25228645;24190971;19394292;16079794;15620353
A6NFI3	Zinc finger protein 316	A6NFI3	Transcription Factor	No Information
ADNP	Activity-dependent neuroprotector homeobox protein	Q9H2P0	Transcription Factor	No Information
ANKRD28	Serine/threonine-protein phosphatase 6 regulatory ankyrin repeat subunit A	O15084	Adaptor/Scaffold	No Information
ANKS3	Ankyrin repeat and SAM domain-containing protein 3	Q6ZW76	Other/Unknown	No Information
ANXA11	Annexin A11	P50995	Other/Unknown	No Information
ARFGAP1	ADP-ribosylation factor GTPase-activating protein 1	Q8N6T3	Other/Unknown	No Information
C19orf47	Uncharacterized protein C19orf47	Q8N9M1	Other/Unknown	No Information
CAMK2B	Calcium/calmodulin-dependent protein kinase type II subunit beta	Q13554	Protein Modifier	No Information
CAMK2G	Calcium/calmodulin-dependent protein kinase type II subunit gamma	Q13555	Protein Modifier	No Information
CCDC86	Coiled-coil domain-containing protein 86	Q9H6F5	Other/Unknown	No Information
CD2AP	CD2-associated protein	Q9Y5K6	Adaptor/Scaffold	No Information
CENPB	Major centromere autoantigen B	P07199	Transcription Factor	No Information
CHAMP1	Chromosome alignment-maintaining phosphoprotein 1	Q96JM3	Other/Unknown	No Information
CMAS	N-acylneuraminate cytidylyltransferase	Q8NFW8	Other/Unknown	No Information
CMTR1	Cap-specific mRNA (nucleoside-2'-O-)-methyltransferase 1	Q8N1G2	RNA Related	No Information
COIL	Coilin	P38432	RNA Related	No Information
COPS8	COP9 signalosome complex subunit 8	Q99627	Signalling	No Information
CSNK1E	Casein kinase I isoform epsilon	P49674	Protein Modifier	No Information
CTSB	Cathepsin B	P07858	Other/Unknown	No Information
CUL1	Cullin-1	Q13616	Adaptor/Scaffold	No Information
DAP3	28S ribosomal protein S29, mitochondrial	P51398	Other/Unknown	No Information
DDX18	ATP-dependent RNA helicase DDX18	Q9NVP1	Helicase_RNA Related	No Information
DDX49	Probable ATP-dependent RNA helicase DDX49	Q9Y6V7	Helicase_RNA Related	No Information
DDX52	Probable ATP-dependent RNA helicase DDX52	Q9Y2R4	Helicase_RNA Related	No Information
DIMT1	Probable dimethyladenosine transferase	Q9UNQ2	RNA Related	No Information
DNAJA3	DnaJ homolog subfamily A member 3, mitochondrial	Q96EY1	Signalling	No Information
DNAJB6	DnaJ homolog subfamily B member 6	O75190	Other/Unknown	No Information
DVL2	Segment polarity protein dishevelled homolog DVL-2	O14641	Signalling	No Information
DYNLL1	Dynein light chain 1, cytoplasmic	P63167	Other/Unknown	No Information
ERBB2IP	Protein LAP2	Q96RT1	Signalling	No Information
GAR1	H/ACA ribonucleoprotein complex subunit 1	Q9NY12	RNA Related	No Information
GLYR1	Putative oxidoreductase GLYR1	Q49A26	Signalling	No Information
GNB2L1	Guanine nucleotide-binding protein subunit beta-2-like 1	P63244	Signalling_Adaptor/Scaffold	No Information
GRB2	Growth factor receptor-bound protein 2	P62993	Signalling_Adaptor/Scaffold	No Information
GRWD1	Glutamate-rich WD repeat-containing protein 1	Q9BQ67	Other/Unknown	No Information
GTF3C2	General transcription factor 3C polypeptide 2	Q8WUA4	GTF	No Information
GTF3C3	General transcription factor 3C polypeptide 3	Q9Y5Q9	GTF	No Information
GTF3C4	General transcription factor 3C polypeptide 4	Q9UKN8	GTF_Protein Modifier	No Information
GTF3C5	General transcription factor 3C polypeptide 5	Q9Y5Q8	GTF	No Information
GTF3C6	General transcription factor 3C polypeptide 6	Q969F1	GTF	No Information
GYS1	Glycogen [starch] synthase, muscle	P13807	Other/Unknown	No Information
H1F0	Histone H1.0	P07305	Histone	No Information
H1FX	Histone H1x	Q92522	Histone	No Information
HECTD1	E3 ubiquitin-protein ligase HECTD1	Q9ULT8	Protein Modifier	No Information
HMGA1	High mobility group protein HMG-I/HMG-Y	P17096	Other/Unknown	No Information
HSPH1	Heat shock protein 105 kDa	Q92598	Other/Unknown	No Information
HUWE1	E3 ubiquitin-protein ligase HUWE1	Q7Z6Z7	Protein Modifier_DNA Replication/Repair	No Information
IQGAP2	Ras GTPase-activating-like protein IQGAP2	Q13576	Signalling	No Information
IWS1	Protein IWS1 homolog	Q96ST2	GTF	No Information
KIF23	Kinesin-like protein KIF23	Q02241	Other/Unknown	No Information
KNOP1	Lysine-rich nucleolar protein 1	Q1ED39	Other/Unknown	No Information
KPNA1	Importin subunit alpha-5	P52294	Adaptor/Scaffold	No Information
KPNA3	Importin subunit alpha-3	O00505	Adaptor/Scaffold	No Information
KPNA4	Importin subunit alpha-3	O00629	Adaptor/Scaffold	No Information
KRI1	Protein KRI1 homolog	Q8N9T8	Other/Unknown	No Information
KRR1	KRR1 small subunit processome component homolog	Q13601	RNA Related	No Information
LANCL1	LanC-like protein 1	O43813	Other/Unknown	No Information
LAS1L	Ribosomal biogenesis protein LAS1L	Q9Y4W2	RNA Related	No Information
LENG8	Leukocyte receptor cluster member 8	Q96PV6	Other/Unknown	No Information
LIG3	DNA ligase 3	P49916	DNA Replication/Repair	No Information
LMNA	Prelamin-A/C	P02545	Other/Unknown	No Information
MAP7D1	MAP7 domain-containing protein 1	Q3KQU3	Other/Unknown	No Information
MAPK1	Mitogen-activated protein kinase 1	P28482	Protein Modifier	No Information
MCM6	DNA replication licensing factor MCM6	Q14566	DNA Replication/Repair	No Information
MIB1	E3 ubiquitin-protein ligase MIB1	Q86YT6	Protein Modifier	No Information
MIDN	Midnolin	Q504T8	Other/Unknown	No Information
MRPS23	28S ribosomal protein S23, mitochondrial	Q9Y3D9	Other/Unknown	No Information
MRPS31	28S ribosomal protein S31, mitochondrial	Q92665	Other/Unknown	No Information
MRPS33	28S ribosomal protein S33, mitochondrial	Q9Y291	Other/Unknown	No Information
MRPS9	28S ribosomal protein S9, mitochondrial	P82933	Other/Unknown	No Information
MYH6	Myosin-7	P13533	Other/Unknown	No Information
NAP1L5	Nucleosome assembly protein 1-like 5	Q96NT1	Other/Unknown	No Information
NDUFS3	NADH dehydrogenase [ubiquinone] iron-sulfur protein 3, mitochondrial	O75489	Other/Unknown	No Information
NOL9	Polynucleotide 5'-hydroxyl-kinase NOL9	Q5SY16	RNA Related	No Information
NPM2	Nucleoplasmin-2	Q86SE8	Chromatin Remodeler	No Information
NUP155	Nuclear pore complex protein Nup155	O75694	Other/Unknown	No Information
NUP160	Nuclear pore complex protein Nup160	Q12769	Other/Unknown_RNA Related	No Information
NUP205	Nuclear pore complex protein Nup205	Q92621	Other/Unknown	No Information
NUP210	Nuclear pore membrane glycoprotein 210	Q8TEM1	Other/Unknown	No Information
PABPN1	Polyadenylate-binding protein 2	Q86U42	RNA Related	No Information
PAK1IP1	p21-activated protein kinase-interacting protein 1	Q9NWT1	Signalling	No Information
PCM1	Pericentriolar material 1 protein	Q15154	Other/Unknown	No Information
PGM3	Phosphoacetylglucosamine mutase	O95394	Other/Unknown	No Information
PNMA2	Paraneoplastic antigen Ma2	Q9UL42	Other/Unknown	No Information
POGZ	Pogo transposable element with ZNF domain	Q7Z3K3	Transcription Factor	No Information
PPAN-P2RY11*	Suppressor of SWI4 1 homolog	Q9NQ55	Other/Unknown	No Information
PPP2CA	Serine/threonine-protein phosphatase 2A catalytic subunit alpha isoform	P67775	Protein Modifier	No Information
PPP3CA	Serine/threonine-protein phosphatase 2B catalytic subunit alpha isoform	Q08209	Protein Modifier	No Information
PPP4C	Serine/threonine-protein phosphatase 4 catalytic subunit	P60510	Protein Modifier_DNA Replication/Repair	No Information
PPP6R3	Serine/threonine-protein phosphatase 6 regulatory subunit 3	Q5H9R7	Adaptor/Scaffold	No Information
PRC1	Protein regulator of cytokinesis 1	O43663	Other/Unknown	No Information
PRKCA	Protein kinase C alpha type	P17252	Protein Modifier	No Information
PSMD3	26S proteasome non-ATPase regulatory subunit 3	O43242	Other/Unknown	No Information
Q9NYL2	Mitogen-activated protein kinase kinase kinase MLT	Q9NYL2	Protein Modifier	No Information
Q9Y2S7	Polymerase delta-interacting protein 2	Q9Y2S7	Other/Unknown	No Information
RAD18	E3 ubiquitin-protein ligase RAD18	Q9NS91	Protein Modifier_DNA Replication/Repair	No Information
RBM42	RNA-binding protein 42	Q9BTD8	RNA Related	No Information
RBM45	RNA-binding protein 45	Q8IUH3	RNA Related	No Information
RIPK4	Receptor-interacting serine/threonine-protein kinase 4	P57078	Protein Modifier	No Information
SAV1	Protein salvador homolog 1	Q9H4B6	Adaptor/Scaffold	No Information
SCML1	Sex comb on midleg-like protein 1	Q9UN30	Other/Unknown	No Information
SCRIB	Protein scribble homolog	Q14160	Adaptor/Scaffold	No Information
SEH1L	Nucleoporin SEH1	Q96EE3	Other/Unknown	No Information
SH3KBP1	SH3 domain-containing kinase-binding protein 1	Q96B97	Adaptor/Scaffold	No Information
SKI	Ski oncogene	P12755	Signalling	No Information
SQSTM1	Sequestosome-1	Q13501	Adaptor/Scaffold_Signalling	No Information
SRP19	Signal recognition particle 19 kDa protein	P09132	RNA Related	No Information
SUFU	Suppressor of fused homolog	Q9UMX1	Other/Unknown	No Information
TCOF1	Treacle protein	Q13428	Other/Unknown	No Information
TES	Testin	Q9UGI8	Adaptor/Scaffold	No Information
TEX10	Testis-expressed sequence 10 protein	Q9NXF1	Other/Unknown	No Information
TPR	Nucleoprotein TPR	P12270	Adaptor/Scaffold_RNA Related	No Information
TPX2	Targeting protein for Xklp2	Q9ULW0	Other/Unknown	No Information
TRIM39	E3 ubiquitin-protein ligase TRIM39	Q9HCM9	Protein Modifier	No Information
TRIOBP	TRIO and F-actin-binding protein	Q9H2D6	Other/Unknown	No Information
UBXN4	UBX domain-containing protein 4	Q92575	Other/Unknown	No Information
UPF2	Regulator of nonsense transcripts 2	Q9HAU5	RNA Related	No Information
USP11	Ubiquitin carboxyl-terminal hydrolase 11	P51784	Protein Modifier_DNA Replication/Repair	No Information
USP7	Ubiquitin carboxyl-terminal hydrolase 7	Q93009	Protein Modifier	No Information
WDR26	WD repeat-containing protein 26	Q9H7D7	Other/Unknown	No Information
WDR61	WD repeat-containing protein 61	Q9GZS3	GTF	No Information
XRCC1	DNA repair protein XRCC1	P18887	DNA Replication/Repair	No Information
XRCC3	DNA repair protein XRCC3	O43542	DNA Replication/Repair	No Information
YTHDC2	Probable ATP-dependent RNA helicase YTHDC2	Q9H6S0	RNA Related	No Information
ZBTB12	Zinc finger and BTB domain-containing protein 12	Q9Y330	Transcription Factor	No Information
ZBTB16	Zinc finger and BTB domain-containing protein 16	Q05516	Transcription Factor	No Information
ZBTB18	Zinc finger and BTB domain-containing protein 18	Q99592	Transcription Factor	No Information
ZBTB40	Zinc finger and BTB domain-containing protein 40	Q9NUA8	Transcription Factor	No Information
ZBTB6	Zinc finger and BTB domain-containing protein 6	Q15916	Transcription Factor	No Information
ZFP30	Zinc finger protein 85	Q9Y2G7	Transcription Factor	No Information
ZKSCAN1	Zinc finger protein with KRAB and SCAN domains 1	P17029	Transcription Factor	No Information
ZKSCAN8	Zinc finger protein with KRAB and SCAN domains 8	Q15776	Transcription Factor	No Information
ZNF136	Zinc finger protein 136	P52737	Transcription Factor	No Information
ZNF146	Zinc finger protein OZF	Q15072	Transcription Factor	No Information
ZNF225	Zinc finger protein 225	Q9UK10	Transcription Factor	No Information
ZNF227	Zinc finger protein 227	Q86WZ6	Transcription Factor	No Information
ZNF234	Zinc finger protein 234	Q14588	Transcription Factor	No Information
ZNF274	Neurotrophin receptor-interacting factor homolog	Q96GC6	Transcription Factor	No Information
ZNF280B	Zinc finger protein 280B	Q86YH2	Transcription Factor	No Information
ZNF45	Zinc finger protein 45	Q02386	Transcription Factor	No Information
ZNF460	Zinc finger protein 460	Q14592	Transcription Factor	No Information
ZNF467	Zinc finger protein 467	Q7Z7K2	Transcription Factor	No Information
ZNF516	Zinc finger protein 516	Q92618	Transcription Factor	No Information
ZNF546	Zinc finger protein 546	Q86UE3	Transcription Factor	No Information
ZNF574	Zinc finger protein 574	Q6ZN55	Transcription Factor	No Information
ZNF669	Zinc finger protein 669	Q96BR6	Transcription Factor	No Information
ZNF724P	Putative zinc finger protein 724	A8MTY0	Transcription Factor	No Information
ZNF768	Zinc finger protein 768	Q9H5H4	Transcription Factor	No Information
ZNF805	Zinc finger protein 805	Q5CZA5	Transcription Factor	No Information
ZSCAN18	Zinc finger and SCAN domain-containing protein 18	Q8TBC5	Transcription Factor	No Information
ZSCAN5B	Zinc finger and SCAN domain-containing protein 5B	A6NJL1	Transcription Factor	No Information
