# Supplementary material for: Multiparameter functional diversity of human C2H2 zinc finger proteins
Source: Genome Res. 2016 Dec;26(12):1742–52. doi: 10.1101/gr.209643.116 (PMC5131825; doi:10.1101/gr.209643.116)
Supplement: Supplemental Material [file supp_gr.209643.116_Supplemental_Table_S11.xlsx]

## Sheet: Legend
Supplemental Table S11 (related to Figure 7): Sequence and multi-parameter similarity of paralogous C2H2-ZFs: Pairs of paralogous proteins in Figure 7 were identified based on inferred homology of C2H2-ZFs as well as BLAST E-value. Similarity of paralogous pairs in terms of different parameters are indicated in columns 7-13. Paralogs are defined as pairs of proteins that have at least one high-co…
Column	Description
Motif_Pearson	Pearson correlation of motifs for each pair of proteins
BindingSite_Jaccard	Jaccard similarity of binding sites across the genome
OE_Pearson	Pearson correlation of gene expression changes after over-expressing proteins
PPI_Pearson	Pearson correlation of normalized spectral counts for pairs of bait proteins
TissueExpression_Pearson	Pearson correlation of expression of pairs of proteins across tissues/cell lines
NoZf_percent_identity	Percentage identity of pairs of proteins across the non-ZF part of the protein
ZfOnly_percent_identity	Percentage identity of pairs of proteins across the ZF part of the protein

## Sheet: Table
Protein1	UniProt1	Domain1	Protein2	UniProt2	Domain2	Motif_Pearson	BindingSite_Jaccard	OE_Pearson	PPI_Pearson	TissueExpression_Pearson	NoZf_percent_identity	ZfOnly_percent_identity
ZNF574	Q6ZN55	-	ZBTB18	Q99592	BTB	0.0295684	0.0607729	NA	-0.0248754	0.237534	8.84676	9.93915
ZBTB6	Q15916	BTB	ZNF667	Q5HYK9	KRAB	0.077604	0.0103435	NA	0.119931	-0.0223853	4.73118	9.97375
ZNF667	Q5HYK9	KRAB	ZBTB26	Q9HCK0	BTB	-0.0184703	0.0605501	NA	0.23136	-0.222013	6.60592	11.0236
ZSCAN5C	A6NGD5	SCAN	ZNF574	Q6ZN55	-	0.0229718	0.058002	0.161326	-0.005097	0.445398	13.806	13.2114
ZNF324	O75467	KRAB	SP2	Q02086	-	0.0374049	0.146544	-0.151316	-0.0247633	0.23884	10.5863	14.3426
ZNF22	P17026	-	ZNF224	Q9NZL3	KRAB	-0.0116263	0.0038738	NA	0.0316539	NA	8.60656	14.3725
ZNF41	P51814	KRAB	ZNF200	P98182	-	0.0347709	0.00410369	NA	NA	0.234101	6.47059	14.8069
ZSCAN5C	A6NGD5	SCAN	ZNF85	Q03923	KRAB	0.0129081	0.0278158	0.106498	-0.018029	-0.143232	8.66337	15.1807
ZNF324	O75467	KRAB	SP1	P08047	-	0.0492105	0.0817039	0.263545	NA	0.46117	8.02005	15.5378
ZNF324	O75467	KRAB	SP4	Q02446	-	0.0535109	0.114692	-0.159587	NA	0.117669	9.39153	15.5378
FEZF1	A0PJY2	-	ZNF595	Q8IYB9	KRAB	-0.0566472	0.0336104	-0.0726024	0.0636508	NA	7.14286	16.9165
ZSCAN5C	A6NGD5	SCAN	ZNF317	Q96PQ6	KRAB	0.0212561	0.014146	0.0248951	-0.0137302	0.385274	11.9048	16.9916
ZSCAN29	Q8IWY8	SCAN	ZNF224	Q9NZL3	KRAB	-0.050527	0.00306961	NA	NA	NA	6.94444	17.4089
ZSCAN5C	A6NGD5	SCAN	ZFP28	Q8NHY6	KRAB,KRAB	-9.76741e-05	0.0078125	0.0476849	0.0400242	-0.0799228	3.14136	17.7835
ZNF200	P98182	-	ZNF543	Q08ER8	KRAB	-0.0402033	0.0078472	NA	NA	0.410143	9.83146	17.8273
ZNF213	O14771	SCAN,KRAB	ZNF418	Q8TF45	KRAB	0.0506771	0.000122026	-0.119927	-0.0119618	0.245964	7.42358	18.3908
ZNF264	O43296	KRAB	ZNF200	P98182	-	-0.0143305	0.0182726	NA	0.135121	0.263661	9.09091	18.663
ZNF692	Q9BU19	-	IKZF3	Q9UKT9	-	-0.0289129	0.0215933	NA	0.0738298	-0.00994557	10.687	18.8776
ZNF189	O75820	KRAB	ZNF22	P17026	-	0.0632222	0.0167647	NA	-0.0614283	0.360651	7.52212	19.4954
ZSCAN5C	A6NGD5	SCAN	ZNF331	Q9NQX6	KRAB	-0.0215592	0.0156412	NA	-0.0187893	-0.34409	6.09137	19.6375
ZNF18	P17022	SCAN,KRAB	ZNF260	Q3ZCT1	-	-0.0103199	0.0399279	NA	NA	0.15706	3.78251	19.774
ZFP64	Q9NPA5	-	IKZF3	Q9UKT9	-	0.143375	0.145308	NA	-0.0214487	0.16521	17.1908	19.9262
ZNF200	P98182	-	ZNF175	Q9Y473	KRAB	0.00835566	0.00128909	NA	0.0150229	-0.0226368	8.1761	19.9446
ZNF33A	Q06730	KRAB	ZSCAN29	Q8IWY8	SCAN	0.0260585	0.00335796	NA	NA	0.578872	9.52986	20.0903
FEZF1	A0PJY2	-	ZNF708	P17019	-	0.0461634	0.0126868	0.181978	0.29412	-0.310799	6.70732	20.4327
OSR2	Q8N2R0	-	ZNF596	Q8TC21	KRAB	0.0455594	0.0244592	0.00951172	-0.0218515	0.270227	3.207	20.462
ZNF22	P17026	-	ZNF45	Q02386	KRAB	0.177885	0.0109378	NA	-0.0666704	0.435812	7.69231	20.4878
FEZF1	A0PJY2	-	ZNF85	Q03923	KRAB	-0.0528394	0.0394356	0.343793	0.234336	0.0229392	11.0512	20.6731
ZNF22	P17026	-	ZNF502	Q8TBZ5	-	-0.0366963	0.000670871	NA	-0.0762545	0.000263491	11.6959	21.447
ZNF322	Q6U7Q0	-	ZNF184	Q99676	KRAB	-0.0128038	0.00912046	-0.0128126	-0.0186572	0.584447	2.38727	21.9282
FEZF1	A0PJY2	-	ZNF98	A6NK75	KRAB	0.362142	0.0185999	NA	-0.0580772	0.203249	1.00402	21.9444
ZNF189	O75820	KRAB	ZSCAN29	Q8IWY8	SCAN	-0.0449052	0.0133881	NA	NA	0.244298	8.81935	22.0183
ZNF22	P17026	-	ZNF175	Q9Y473	KRAB	0.125967	0.0125711	NA	-0.0862224	0.204314	7.86517	22.1607
ZSCAN30	Q86W11	SCAN	ZNF594	Q96JF6	-	0.0332935	0.0319756	NA	0.0760463	0.191979	11.1675	22.5352
ZNF22	P17026	-	ZFP3	Q96NJ6	-	-0.042564	0	NA	-0.162419	0.148517	16.0839	23.1198
ZNF18	P17022	SCAN,KRAB	ZNF436	Q9C0F3	KRAB	-0.0481771	0.00869532	NA	0.00686789	0.0784789	8.46682	23.2628
ZNF354A	O60765	KRAB	ZNF22	P17026	-	-0.0271466	0.00451443	NA	-0.0646838	0.326018	9.1954	23.4463
ZSCAN29	Q8IWY8	SCAN	ZFP28	Q8NHY6	KRAB,KRAB	-0.0244673	0	NA	NA	-0.179561	13.8404	23.4536
ZNF18	P17022	SCAN,KRAB	ZNF774	Q6NX45	KRAB	0.0222006	0.00114909	NA	NA	0.0593134	10.0239	23.565
ZSCAN30	Q86W11	SCAN	ZNF184	Q99676	KRAB	-0.0294417	0.00860144	NA	0.0691166	-0.185699	16.4134	23.6295
ZNF467	Q7Z7K2	-	ZSCAN29	Q8IWY8	SCAN	-0.0511053	0.0106751	NA	NA	-0.425412	9.48509	23.676
ZNF213	O14771	SCAN,KRAB	ZNF436	Q9C0F3	KRAB	-0.0366544	0.00781878	-0.119711	0.00866459	-0.0607756	12.7536	23.8671
ZNF350	Q9GZX5	KRAB	ZNF224	Q9NZL3	KRAB	0.0158459	0.0167556	0.0410088	0.443296	NA	18.732	23.8866
ZNF324	O75467	KRAB	ZNF224	Q9NZL3	KRAB	-0.0437659	0.035224	0.321917	0.443321	NA	21.1009	24.0891
FEZF1	A0PJY2	-	ZNF680	Q8NEM1	KRAB	0.124626	0.00189832	0.193423	NA	-0.399953	1.40562	24.0964
ZNF574	Q6ZN55	-	ZNF331	Q9NQX6	KRAB	0.0298503	0.046917	NA	0.0352012	-0.164686	7.80488	24.1509
ZNF22	P17026	-	ZNF774	Q6NX45	KRAB	0.0827284	0.00126057	NA	NA	-0.47835	1.32743	24.4713
ZNF45	Q02386	KRAB	ZSCAN29	Q8IWY8	SCAN	-0.000811939	0.00690036	NA	NA	0.602086	9.2	24.6341
FEZF1	A0PJY2	-	ZNF675	Q8TD23	KRAB	0.0691319	0.000346964	-0.293568	0.108874	-0.0140401	12.9577	25.0755
ZSCAN5C	A6NGD5	SCAN	SP4	Q02446	-	-0.0329419	0.0367096	0.0511164	NA	0.106241	4.26439	25.1799
ZSCAN29	Q8IWY8	SCAN	ZNF502	Q8TBZ5	-	0.0103482	0.00360577	NA	NA	0.115762	5.58659	25.323
ZNF574	Q6ZN55	-	ZNF467	Q7Z7K2	-	0.0171902	0.139209	-0.425562	0.190924	-0.00955454	19.6759	25.3846
ZNF213	O14771	SCAN,KRAB	ZNF146	Q15072	-	0.0188355	1.5117e-05	NA	-0.0169018	-0.512588	1.23457	25.4545
ZSCAN5C	A6NGD5	SCAN	ZNF324	O75467	KRAB	-0.0206366	0.0604105	-0.109557	-0.015422	0.365913	16.7421	25.5061
ZNF513	Q8N8E2	-	IKZF3	Q9UKT9	-	0.0343031	0.000558971	NA	0.0272525	-0.0497098	14.561	25.7009
ZSCAN5C	A6NGD5	SCAN	SP1	P08047	-	-0.0107478	0.0281089	0.0535846	NA	0.451038	5.50562	25.8993
ZNF543	Q08ER8	KRAB	ZSCAN29	Q8IWY8	SCAN	0.0107892	0.00655193	NA	NA	0.602973	4.58488	25.9053
ZSCAN30	Q86W11	SCAN	ZNF418	Q8TF45	KRAB	0.112631	0.00306866	NA	0.0215361	0.372437	9.92908	25.977
ZNF22	P17026	-	ZNF436	Q9C0F3	KRAB	-0.00696198	0.00540096	NA	0.0200457	0.0613185	8.33333	25.9819
ZNF264	O43296	KRAB	ZSCAN29	Q8IWY8	SCAN	-0.0352855	0.0145556	NA	NA	0.232538	8.84718	26.1838
ZSCAN29	Q8IWY8	SCAN	ZNF175	Q9Y473	KRAB	0.0294923	0.000908884	NA	NA	0.0539037	9.62289	26.5928
ZSCAN5C	A6NGD5	SCAN	SP2	Q02086	-	-0.0237396	0.0447359	0.128282	-0.00551729	0.276299	11.4754	26.6187
ZNF22	P17026	-	ZNF34	Q8IZ26	KRAB	0.0952851	0.00369957	NA	-0.0574121	-0.298872	6.3745	26.9939
ZNF250	P15622	KRAB	ZSCAN29	Q8IWY8	SCAN	0.0465397	0.00414608	NA	NA	0.00713527	6.43432	27.0195
ZNF33A	Q06730	KRAB	ZSCAN30	Q86W11	SCAN	-0.0114795	0.00373902	NA	0.0270864	0.0519725	15.7407	27.088
ZNF134	P52741	-	ZNF224	Q9NZL3	KRAB	-0.0294619	0.0117272	0.320426	0.0606849	NA	13.5338	27.3279
GLI4	P10075	-	ZNF667	Q5HYK9	KRAB	0.131214	0.020219	NA	0.326611	-0.147309	0.992556	27.6316
GLI4	P10075	-	ZNF467	Q7Z7K2	-	-0.023117	0.052805	NA	0.201046	0.200497	21.6312	27.7259
ZNF547	Q8IVP9	KRAB	ZNF184	Q99676	KRAB	-0.049438	0.0104007	NA	0.15902	0.104213	19.0476	27.7883
ZNF774	Q6NX45	KRAB	ZSCAN31	Q96LW9	SCAN	-0.0176568	0.00218202	NA	NA	0.531061	13.7324	27.7946
ZNF574	Q6ZN55	-	ZNF317	Q96PQ6	KRAB	-0.0190196	0.0702785	-0.195102	0.236022	0.210992	11.2288	27.833
FEZF1	A0PJY2	-	ZNF257	Q9Y2Q1	KRAB	0.0844712	0.0267353	-0.415841	0.138389	-0.0967493	0.350263	27.907
ZNF354A	O60765	KRAB	ZSCAN29	Q8IWY8	SCAN	0.04102	0.00165877	NA	NA	0.356094	7.47283	27.9661
ZNF30	P17039	KRAB	ZNF350	Q9GZX5	KRAB	-0.000163998	0.0506238	NA	0.93468	NA	20.3593	28.0822
ZSCAN29	Q8IWY8	SCAN	ZFP3	Q96NJ6	-	0.0331396	0.00978417	NA	NA	0.398387	4.16107	28.1337
ZNF33A	Q06730	KRAB	ZNF586	Q9NXT0	KRAB	0.00290727	0.00598802	NA	NA	0.658616	16.7568	28.2167
ZNF140	P52738	KRAB	ZNF224	Q9NZL3	KRAB	-0.0247543	0.0131613	NA	0.43989	NA	26.0274	28.5425
ZNF33A	Q06730	KRAB	ZNF610	Q8N9Z0	KRAB	-0.0406118	0.025223	0.247738	0.489765	-0.185722	20.7161	28.6682
ZNF22	P17026	-	ZNF768	Q9H5H4	-	0.00709475	0.00555715	NA	0.166199	-0.236534	7.03704	28.7273
ZNF41	P51814	KRAB	ZNF350	Q9GZX5	KRAB	0.0405983	0.000587947	0.0640729	NA	NA	22.5118	29.1845
ZNF324	O75467	KRAB	ZNF189	O75820	KRAB	-0.0166941	0.143859	0.302909	0.0312795	-0.202462	16.3205	29.3578
ZNF582	Q96NG8	KRAB	ZNF184	Q99676	KRAB	0.00339698	0.00131752	0.0686572	0.38874	0.056422	23.0769	29.4896
ZNF189	O75820	KRAB	ZSCAN22	P10073	SCAN	0.0987176	0.130603	-0.188394	0.0730664	-0.188784	12.6582	29.7052
ZNF329	Q86UD4	-	ZSCAN31	Q96LW9	SCAN	0.00129286	0.0963577	NA	-0.051469	0.0967074	17.1429	29.9094
ZSCAN29	Q8IWY8	SCAN	ZNF436	Q9C0F3	KRAB	0.00973483	0.00149639	NA	NA	0.119036	6.50289	30.2115
ZNF513	Q8N8E2	-	ZFP64	Q9NPA5	-	-0.0605466	0.00150228	0.202601	0.00703155	0.401365	12.5725	30.2239
ZNF324	O75467	KRAB	ZNF22	P17026	-	-0.0254921	0.0117747	NA	-0.0598337	-0.128889	7.93651	30.3644
ZSCAN29	Q8IWY8	SCAN	ZNF34	Q8IZ26	KRAB	0.0284045	0.00673241	NA	NA	0.0514624	7.31034	30.3681
ZNF394	Q53GI3	SCAN,KRAB	ZNF34	Q8IZ26	KRAB	0.0549055	0.0065714	NA	0.107438	0.0561781	14.0389	30.3681
ZSCAN22	P10073	SCAN	ZNF708	P17019	-	0.0185371	0.0132763	-0.101068	0.116185	0.133845	6.66667	30.6024
ZNF140	P52738	KRAB	ZNF184	Q99676	KRAB	0.104238	0.000701672	NA	0.476496	0.534637	28.6885	30.6238
ZNF454	Q8N9F8	KRAB	ZSCAN31	Q96LW9	SCAN	0.0157923	0.0535752	NA	-0.0691165	0.463902	16.3043	30.6748
ZNF8	P17098	KRAB	ZFP3	Q96NJ6	-	-0.0196765	0.00519068	NA	0.300572	NA	7.94045	30.9192
ZNF224	Q9NZL3	KRAB	ZNF214	Q9UL59	KRAB	0.0559482	0.00416948	-0.0728358	0.396959	NA	20.1705	30.9717
ZNF8	P17098	KRAB	ZNF71	Q9NQZ8	-	-0.0674139	0.0157962	NA	0.00391062	NA	8.45771	31.1978
ZNF8	P17098	KRAB	ZNF331	Q9NQX6	KRAB	-0.00639111	0.0198978	NA	0.954625	NA	10.5651	31.4199
ZNF324	O75467	KRAB	ZNF45	Q02386	KRAB	-0.0130569	0.0277379	NA	0.962687	0.573329	22.3837	31.4634
ZNF677	Q86XU0	KRAB	ZNF224	Q9NZL3	KRAB	-0.0197394	0.00344879	-0.0053029	0.29223	NA	24.735	31.4741
ZSCAN30	Q86W11	SCAN	ZNF502	Q8TBZ5	-	0.131149	0.00659126	NA	0.0356232	0.595073	16.242	31.5245
ZNF41	P51814	KRAB	ZNF134	P52741	-	-0.00171011	0	0.233462	NA	0.579205	6.91358	31.5451
GLI4	P10075	-	MZF1	P28698	SCAN	0.0220781	0.0501821	NA	0.0220099	0.874239	13.3949	31.6384
ZNF774	Q6NX45	KRAB	ZSCAN29	Q8IWY8	SCAN	-0.0526505	0.00636943	NA	NA	0.259142	5.45455	31.7221
GLI4	P10075	-	ZNF543	Q08ER8	KRAB	0.0477742	0.0210402	NA	NA	-0.284985	4.0107	31.7549
ZNF708	P17019	-	ZNF610	Q8N9Z0	KRAB	-0.00188299	0.0176875	0.0254421	0.448025	0.0825409	7.28745	31.8072
ZNF574	Q6ZN55	-	ZFP28	Q8NHY6	KRAB,KRAB	0.0373675	0.011291	-0.254962	-0.00278742	-0.0604202	4.57433	31.8898
ZNF354A	O60765	KRAB	ZNF554	Q86TJ5	KRAB	0.0266115	0.0111549	NA	0.993796	-0.266135	21.9512	31.9209
ZFP28	Q8NHY6	KRAB,KRAB	ZNF586	Q9NXT0	KRAB	0.00926196	0	NA	NA	-0.183631	10.609	32.2165
ZNF85	Q03923	KRAB	ZNF610	Q8N9Z0	KRAB	-0.0235177	0.0413002	0.209752	0.118075	0.324292	25.0951	32.2892
ZNF467	Q7Z7K2	-	ZNF586	Q9NXT0	KRAB	0.0231105	0.000562035	NA	NA	-0.0318415	8.40108	32.3988
ZNF22	P17026	-	ZNF322	Q6U7Q0	-	-0.00613056	0.0224689	NA	-0.0989724	0.423989	1.55642	32.4201
ZSCAN29	Q8IWY8	SCAN	ZNF768	Q9H5H4	-	-0.00631968	0.00827043	NA	NA	-0.0876709	6.48379	32.7273
ZNF543	Q08ER8	KRAB	ZNF586	Q9NXT0	KRAB	0.153895	0.000264131	NA	NA	0.555379	24.5283	32.8691
ZNF85	Q03923	KRAB	ZNF574	Q6ZN55	-	-0.012502	0.0620847	0.236857	0.314887	-0.0566506	1.66667	33.0709
ZNF264	O43296	KRAB	ZNF586	Q9NXT0	KRAB	-0.039746	0.000151504	NA	NA	0.356608	21.6216	33.1476
FEZF1	A0PJY2	-	ZNF273	Q14593	KRAB	0.0947928	0.00278739	0.365333	0.108104	-0.089247	2.46046	33.2103
ZNF33A	Q06730	KRAB	ZNF467	Q7Z7K2	-	-0.0588092	0.0012341	-0.110815	0.0267758	0.122467	1.66389	33.4086
GLI4	P10075	-	ZFP3	Q96NJ6	-	-0.0173237	0.0172991	NA	-0.0543094	0.0355173	16.055	33.4262
GLI4	P10075	-	ZNF71	Q9NQZ8	-	-0.00746831	0.114323	NA	0.0762913	0.474573	19.3237	33.4262
ZNF528	Q3MIS6	KRAB	ZNF547	Q8IVP9	KRAB	-0.0251527	0.0280698	NA	0.182186	0.0758046	18.6508	33.7349
ZNF263	O14978	SCAN,KRAB	ZNF18	P17022	SCAN,KRAB	0.0981181	0.00187587	NA	0.448045	0.230428	24.8544	33.7553
ZNF594	Q96JF6	-	ZNF331	Q9NQX6	KRAB	0.0558979	0.0152897	NA	-0.0246138	0.458292	9.88593	33.8028
ZNF263	O14978	SCAN,KRAB	ZNF260	Q3ZCT1	-	0.226848	0	NA	NA	0.0742953	3.7694	33.8983
ZNF250	P15622	KRAB	ZNF586	Q9NXT0	KRAB	0.0652546	0	NA	NA	0.213333	28.1938	33.9833
ZNF22	P17026	-	ZNF214	Q9UL59	KRAB	-0.0210587	0.00427134	NA	-0.0752407	-0.188554	5.44959	34.0824
ZNF502	Q8TBZ5	-	ZNF350	Q9GZX5	KRAB	-0.0163925	0.000496401	0.230903	0.972976	NA	12.9518	34.1085
ZNF213	O14771	SCAN,KRAB	ZNF586	Q9NXT0	KRAB	0.0216969	0.000648677	NA	NA	-0.145868	7.16049	34.2466
ZNF418	Q8TF45	KRAB	ZNF586	Q9NXT0	KRAB	0.0593398	0.000385171	NA	NA	-0.168029	33.2061	34.4828
ZNF677	Q86XU0	KRAB	ZNF184	Q99676	KRAB	0.053538	0.00234697	0.0559631	0.130283	-0.148209	17.3021	34.5216
ZNF33A	Q06730	KRAB	ZNF273	Q14593	KRAB	-0.0526728	0.00527315	-0.357151	0.104032	0.399553	16.5179	34.5372
ZNF16	P17020	-	ZNF547	Q8IVP9	KRAB	-0.00427139	0.00399202	NA	-0.0242067	0.170941	14.8936	34.6988
ZNF34	Q8IZ26	KRAB	ZNF224	Q9NZL3	KRAB	-0.0324912	0.0270328	NA	0.440535	NA	21.8519	34.8178
ZNF684	Q5T5D7	KRAB	ZFP3	Q96NJ6	-	0.0643535	0	-0.0824803	-0.0206724	-0.0242512	14.0187	34.8189
ZNF324	O75467	KRAB	ZNF502	Q8TBZ5	-	-0.0367292	0.0070262	-0.115139	0.973461	-0.0259081	11.8156	34.8837
ZNF324	O75467	KRAB	ZNF175	Q9Y473	KRAB	-0.0334019	0.00106572	-0.231638	0.983063	0.117277	16.6667	34.903
ZNF8	P17098	KRAB	OSR2	Q8N2R0	-	-0.0428074	0.0292713	NA	-0.0298998	NA	5.57851	34.9462
ZNF554	Q86TJ5	KRAB	ZNF34	Q8IZ26	KRAB	0.0112836	0.041791	NA	0.15951	0.245894	21.1082	34.9693
ZNF41	P51814	KRAB	ZNF146	Q15072	-	0.0565583	0	NA	NA	0.764397	2.25352	34.9785
ZNF774	Q6NX45	KRAB	ZNF224	Q9NZL3	KRAB	-0.0208	0.000387747	NA	NA	NA	13.7168	35.0202
ZNF684	Q5T5D7	KRAB	ZNF774	Q6NX45	KRAB	0.185882	0.00212314	NA	NA	-0.276694	14.7059	35.0453
ZNF528	Q3MIS6	KRAB	ZNF610	Q8N9Z0	KRAB	-0.0205782	0.114445	-0.0905241	0.227699	0.197321	58.8477	35.1807
ZNF354A	O60765	KRAB	ZNF594	Q96JF6	-	-0.0370341	0.0036157	NA	-0.0102472	0.314089	13.522	35.2113
ZNF324	O75467	KRAB	ZSCAN29	Q8IWY8	SCAN	-0.0387074	0.0221976	NA	NA	0.334081	10.218	35.6275
ZNF667	Q5HYK9	KRAB	ZNF582	Q96NG8	KRAB	0.0336143	0.000408052	-0.0741815	0.0759617	0.521425	27.7778	35.7895
ZNF146	Q15072	-	ZNF418	Q8TF45	KRAB	-0.0230071	0	NA	0.0607589	-0.186968	2.90456	35.8621
ZNF680	Q8NEM1	KRAB	ZNF184	Q99676	KRAB	0.0931403	0.0102	-0.117275	NA	0.12393	24.498	35.9168
ZNF264	O43296	KRAB	ZSCAN22	P10073	SCAN	0.00218078	0.092108	NA	0.241822	-0.191737	15.2174	35.9331
ZNF189	O75820	KRAB	ZNF214	Q9UL59	KRAB	-0.0286391	0.00386392	-0.0632115	0.193346	0.129965	14.6341	36.0092
ZNF37A	P17032	KRAB	ZNF41	P51814	KRAB	0.129287	0.000930465	NA	NA	0.701588	23.0958	36.0515
ZNF594	Q96JF6	-	ZNF436	Q9C0F3	KRAB	-0.0100079	0.0102688	NA	0.117546	0.405971	6.45161	36.0915
ZNF547	Q8IVP9	KRAB	ZNF418	Q8TF45	KRAB	0.092771	0.00477239	NA	0.234247	0.27716	23.8866	36.092
ZSCAN30	Q86W11	SCAN	ZFP3	Q96NJ6	-	-0.0120364	0.00825063	NA	0.339155	0.29068	8.84956	36.2117
ZNF554	Q86TJ5	KRAB	ZNF436	Q9C0F3	KRAB	0.0403751	0.0212623	0.227194	0.0804928	0.214303	12.1053	36.2538
ZSCAN22	P10073	SCAN	ZNF680	Q8NEM1	KRAB	0.0206118	0.0288687	0.191099	NA	-0.181876	15.2778	36.2538
ZNF774	Q6NX45	KRAB	ZNF322	Q6U7Q0	-	0.0958922	0.00639283	NA	NA	-0.13305	15.2838	36.2538
ZNF467	Q7Z7K2	-	ZFP28	Q8NHY6	KRAB,KRAB	0.211816	0.00719383	0.139331	0.00592142	-0.169828	5.07463	36.3402
ZNF329	Q86UD4	-	ZNF224	Q9NZL3	KRAB	0.0112797	0.020722	-0.138192	0.107299	NA	21.3483	36.4372
ZNF30	P17039	KRAB	ZNF582	Q96NG8	KRAB	0.0325081	0.0036912	NA	0.93638	0.0922723	27.3381	36.5297
ZNF684	Q5T5D7	KRAB	ZNF329	Q86UD4	-	0.0044298	0.00411478	0.311145	0.142416	-0.0857006	14.7541	36.5559
ZNF33A	Q06730	KRAB	ZNF382	Q96SR6	KRAB	0.0179193	0.0011109	-0.391093	0.96663	0.139485	29.4416	36.5688
ZNF140	P52738	KRAB	ZNF816	Q0VGE8	KRAB	0.0991086	0.0246217	NA	0.758769	0.651509	20.8178	36.6906
ZNF98	A6NK75	KRAB	ZNF610	Q8N9Z0	KRAB	-0.0106767	0.00549739	NA	0.0593319	0.18708	23.4875	36.7688
ZNF224	Q9NZL3	KRAB	ZNF175	Q9Y473	KRAB	-0.00606556	0	-0.335955	0.429158	NA	19.2737	36.8421
ZNF502	Q8TBZ5	-	ZNF382	Q96SR6	KRAB	0.137949	0.00452985	-0.222065	0.960697	0.380399	11.7089	36.9509
ZNF324	O75467	KRAB	ZNF467	Q7Z7K2	-	0.0755069	0.100579	0.274424	0.0242081	-0.014273	19.337	37.0717
ZNF37A	P17032	KRAB	ZNF30	P17039	KRAB	9.2441e-05	0.0140697	NA	0.950551	0.592958	20.5696	37.2146
ZNF134	P52741	-	ZNF418	Q8TF45	KRAB	-0.000208413	0.00552524	-0.152687	0.322743	0.347859	21.3439	37.2414
ZNF264	O43296	KRAB	ZNF324	O75467	KRAB	-0.00471006	0.103494	NA	0.323858	-0.0916124	22.9462	37.3259
ZNF33A	Q06730	KRAB	ZNF146	Q15072	-	-0.0202239	0	NA	0.0942109	0.824266	1.08992	37.4718
ZNF324	O75467	KRAB	ZFP3	Q96NJ6	-	-0.0223109	0.024575	0.180163	0.292391	0.320277	9.77918	37.6045
ZNF189	O75820	KRAB	ZNF140	P52738	KRAB	0.139624	0.034298	NA	0.158525	0.341972	26.2222	37.6147
ZNF320	A2RRD8	KRAB	ZNF189	O75820	KRAB	0.0536569	0.0443585	-0.207545	0.0728833	0.154721	27.2727	37.6147
MZF1	P28698	SCAN	ZNF224	Q9NZL3	KRAB	0.00321855	0.0192935	-0.099526	0.160201	NA	9.63855	37.6518
ZNF30	P17039	KRAB	ZNF140	P52738	KRAB	-0.0186446	0.0304393	NA	0.829727	0.355104	29.6296	37.6712
ZSCAN30	Q86W11	SCAN	ZNF436	Q9C0F3	KRAB	0.136989	0.00595913	NA	0.0157834	0.0991121	7.64873	37.7644
ZNF30	P17039	KRAB	ZNF146	Q15072	-	0.0185293	5.9891e-05	NA	0.115458	0.220903	2.7027	37.8995
ZNF594	Q96JF6	-	ZFP3	Q96NJ6	-	0.0560631	0.0123212	NA	0.0144385	0.628339	14.7727	38.0454
ZNF264	O43296	KRAB	ZNF467	Q7Z7K2	-	-0.0524379	0.0744518	NA	0.149798	0.0765765	14.5553	38.1616
ZSCAN29	Q8IWY8	SCAN	ZNF214	Q9UL59	KRAB	-0.0329999	0.00375379	NA	NA	-0.217444	9.0216	38.2022
ZNF324	O75467	KRAB	ZNF774	Q6NX45	KRAB	0.0117386	0.00858688	NA	NA	0.436981	9.53678	38.3686
ZNF264	O43296	KRAB	ZNF184	Q99676	KRAB	-0.0442044	0.00492611	NA	0.222821	0.212659	20.5882	38.3743
ZNF16	P17020	-	ZNF134	P52741	-	0.0162935	0.00462177	-0.293613	0.142199	0.33812	16.1049	38.5542
ZNF184	Q99676	KRAB	ZNF331	Q9NQX6	KRAB	0.0350962	0.00295354	NA	0.396806	0.351711	25.5605	38.5633
ZNF610	Q8N9Z0	KRAB	ZNF680	Q8NEM1	KRAB	-0.0273685	0.0375563	0.302701	NA	-0.0224212	23.8267	38.6707
ZNF121	P58317	-	ZNF260	Q3ZCT1	-	0.00983081	0.0306252	NA	NA	0.672431	10.7383	38.7006
ZNF37A	P17032	KRAB	MZF1	P28698	SCAN	0.0383824	0.00812836	NA	0.197255	-0.0206459	12.0614	38.7006
ZNF543	Q08ER8	KRAB	ZNF467	Q7Z7K2	-	0.0370517	0.0196547	-0.223392	NA	-0.36545	10.4683	38.7187
ZNF547	Q8IVP9	KRAB	ZNF502	Q8TBZ5	-	0.140712	0.00176056	NA	0.392768	0.185055	9.95475	38.7597
ZNF273	Q14593	KRAB	ZNF528	Q3MIS6	KRAB	0.0794111	0.00932774	0.20985	0.44519	0.104017	23.7654	38.7952
ZNF250	P15622	KRAB	ZNF467	Q7Z7K2	-	-0.00343531	5.9529e-05	-0.257112	0.00426661	0.179654	12.3919	38.9972
ZNF16	P17020	-	ZNF140	P52738	KRAB	-0.0117835	0.000141918	NA	0.149721	0.282409	11.1111	39.0361
ZNF250	P15622	KRAB	ZNF594	Q96JF6	-	-0.0404109	0.00344009	NA	0.0184443	0.520403	11.25	39.4366
ZNF549	Q6P9A3	KRAB	ZIM3	Q96PE6	KRAB	-0.0259577	0.00141633	NA	0.835636	-0.0681977	20.8754	39.5028
ZNF669	Q96BR6	KRAB	ZNF490	Q9ULM2	KRAB	0.0184012	0.000429566	-0.185115	0.701972	0.771193	30.2632	39.6067
ZFP3	Q96NJ6	-	ZNF224	Q9NZL3	KRAB	0.0352849	0.00527786	0.460264	0.0959031	NA	20.3704	39.6761
ZFP28	Q8NHY6	KRAB,KRAB	ZNF582	Q96NG8	KRAB	-0.0117253	0.000862069	-0.0420752	0.48878	0.733437	22.379	39.6907
MZF1	P28698	SCAN	ZNF467	Q7Z7K2	-	0.00686939	0.0576508	-0.263747	0.0287165	0.193591	19.1388	39.7222
ZNF33A	Q06730	KRAB	ZNF680	Q8NEM1	KRAB	-0.0190396	0.00835322	0.0526371	NA	0.73634	16.7939	39.7291
ZNF134	P52741	-	ZNF502	Q8TBZ5	-	0.0646411	0.00041534	0.173719	0.265467	0.145931	9.76744	39.7933
ZNF554	Q86TJ5	KRAB	ZNF768	Q9H5H4	-	0.0675732	0.0216748	0.695268	-0.00792232	0.158109	14.433	40
ZNF324	O75467	KRAB	ZNF8	P17098	KRAB	0.00955718	0.032858	NA	0.995315	NA	23.5294	40.081
ZNF543	Q08ER8	KRAB	ZNF547	Q8IVP9	KRAB	-0.0135639	0.00197183	NA	NA	0.0649343	20.4545	40.1114
ZNF324	O75467	KRAB	MZF1	P28698	SCAN	0.0100194	0.0954511	-0.0523169	0.187316	0.660104	17.1053	40.113
ZNF273	Q14593	KRAB	ZNF595	Q8IYB9	KRAB	0.0312916	0.00760152	0.256882	0.083798	NA	40.1338	40.1288
ZNF33A	Q06730	KRAB	ZNF415	Q09FC8	-	-0.013705	0.000674172	NA	NA	-0.297579	14.128	40.1806
ZNF502	Q8TBZ5	-	ZNF214	Q9UL59	KRAB	0.00676845	0.000152579	-0.00184378	0.724421	0.560089	11.1111	40.3101
ZNF136	P52737	KRAB	ZNF669	Q96BR6	KRAB	-0.0553979	0.0146827	NA	0.803599	0.699022	26.5918	40.39
ZNF30	P17039	KRAB	ZNF677	Q86XU0	KRAB	-0.00985754	0.00744243	NA	0.223528	-0.253839	23.1544	40.411
ZNF146	Q15072	-	ZNF549	Q6P9A3	KRAB	0.0150832	0	NA	0.0951344	0.49352	1.79211	40.4432
ZNF528	Q3MIS6	KRAB	ZNF419	Q96HQ0	KRAB	0.0481936	0.0051806	0.0793802	0.478439	0.27549	26.1905	40.4819
ZNF263	O14978	SCAN,KRAB	ZNF454	Q8N9F8	KRAB	0.00130821	0.000394205	NA	0.0532404	-0.25399	13.7214	40.4908
ZNF250	P15622	KRAB	ZIM3	Q96PE6	KRAB	0.019186	0	NA	0.157212	-0.0171762	22.5108	40.5556
ZNF250	P15622	KRAB	ZNF134	P52741	-	0.0118012	1.5725e-05	-0.296724	0.0620284	0.412928	4.45205	40.6685
ZNF436	Q9C0F3	KRAB	ZNF586	Q9NXT0	KRAB	0.0951562	0	NA	NA	0.097286	25.7732	40.7855
ZNF418	Q8TF45	KRAB	ZNF594	Q96JF6	-	0.0385311	0.00748149	NA	0.0923948	0.452952	20.3279	41.1972
ZNF264	O43296	KRAB	ZNF140	P52738	KRAB	-0.00399331	0.0263256	NA	0.344778	0.17923	21.8978	41.3889
ZNF324	O75467	KRAB	ZNF331	Q9NQX6	KRAB	0.0304304	0.0593655	NA	0.955439	-0.128619	13.0573	41.3897
ZFP3	Q96NJ6	-	ZNF184	Q99676	KRAB	0.105816	0	0.0565266	0.364851	0.208089	15.4472	41.3989
ZNF324	O75467	KRAB	ZNF34	Q8IZ26	KRAB	0.0458783	0.062999	NA	0.12862	0.224875	20.3966	41.411
ZNF684	Q5T5D7	KRAB	ZNF454	Q8N9F8	KRAB	-0.0488184	0.00179524	-0.317846	-0.0499298	-0.254769	24.3243	41.411
ZNF37A	P17032	KRAB	ZNF467	Q7Z7K2	-	0.543835	0.00493175	NA	0.0214306	-0.0622183	1.1236	41.433
ZNF146	Q15072	-	ZNF586	Q9NXT0	KRAB	-0.004925	0	NA	NA	0.679465	3.26087	41.4545
ZNF354A	O60765	KRAB	ZNF768	Q9H5H4	-	-0.0221323	9.41e-05	NA	-0.00738802	-0.361259	15.2941	41.5254
ZNF146	Q15072	-	ZNF175	Q9Y473	KRAB	0.0643054	0	NA	0.109666	-0.0717521	2.849	41.5512
ZNF140	P52738	KRAB	ZNF667	Q5HYK9	KRAB	0.0244513	0.0114198	NA	0.265119	-0.269806	27.9661	41.5789
ZNF543	Q08ER8	KRAB	ZNF184	Q99676	KRAB	0.0387947	0.00285987	-0.10837	NA	0.334088	24.0602	41.5879
ZNF41	P51814	KRAB	ZNF329	Q86UD4	-	0.023038	0	-0.125102	NA	-0.154374	12.6582	41.6309
ZNF320	A2RRD8	KRAB	ZNF16	P17020	-	0.0338583	0.00230386	0.114741	0.033175	0.165161	18.2131	41.6867
ZNF329	Q86UD4	-	ZNF350	Q9GZX5	KRAB	-0.0179452	0.0371516	-0.408565	0.264123	NA	13.913	41.6918
ZNF189	O75820	KRAB	ZNF680	Q8NEM1	KRAB	0.087367	0.0275705	-0.0714201	NA	0.751833	22.7468	41.7431
ZFP3	Q96NJ6	-	ZNF214	Q9UL59	KRAB	0.0217031	0	-0.0524829	0.278289	-0.0676945	8.90052	41.7582
ZNF214	Q9UL59	KRAB	ZNF175	Q9Y473	KRAB	-0.00844783	0	-0.0479824	0.733149	0.360051	20.8232	41.7582
ZNF98	A6NK75	KRAB	ZNF582	Q96NG8	KRAB	-0.00321891	0	NA	0.0605782	0.27747	26.6212	41.7827
ZNF134	P52741	-	ZNF260	Q3ZCT1	-	-0.00310206	0.0178456	NA	NA	0.389759	7.7381	41.8079
ZNF140	P52738	KRAB	ZNF322	Q6U7Q0	-	0.0473788	0.018463	NA	0.00775258	0.403171	10.9489	41.8182
ZNF382	Q96SR6	KRAB	ZNF436	Q9C0F3	KRAB	-0.0124387	0	0.115636	0.0869831	0.157735	11.4114	41.994
GLI4	P10075	-	ZNF37A	P17032	KRAB	-0.0575989	0.0142724	NA	-0.0415836	0.0198589	3.64964	42.1818
ZNF41	P51814	KRAB	ZNF549	Q6P9A3	KRAB	-0.000341366	0.00828685	NA	NA	0.533589	19.1038	42.3077
ZNF320	A2RRD8	KRAB	ZNF667	Q5HYK9	KRAB	0.0118124	0.023686	-0.144029	0.162718	0.410667	25.5906	42.3684
ZNF16	P17020	-	ZNF677	Q86XU0	KRAB	0.0329182	0.00196618	-0.268086	0.0516095	0.0366134	17.5926	42.5178
ZNF528	Q3MIS6	KRAB	ZNF677	Q86XU0	KRAB	0.0041691	0.00442285	-0.200939	0.145153	0.286008	31.2081	42.5837
ZNF263	O14978	SCAN,KRAB	ZNF329	Q86UD4	-	0.0378732	0	NA	0.299091	-0.147308	12.3667	42.5982
ZNF264	O43296	KRAB	ZNF582	Q96NG8	KRAB	0.0146248	0.00148245	NA	0.33033	0.653131	22.4299	42.6184
ZNF37A	P17032	KRAB	ZNF502	Q8TBZ5	-	-0.0301888	0.00251572	NA	0.951939	0.111422	13.0293	42.6357
ZNF134	P52741	-	ZNF549	Q6P9A3	KRAB	0.0379016	0.0231922	NA	0.30199	0.700011	17.4658	42.6593
ZNF33A	Q06730	KRAB	ZNF549	Q6P9A3	KRAB	0.0220672	0.0224487	NA	0.86495	0.518302	19.0476	42.8251
ZNF37A	P17032	KRAB	ZNF549	Q6P9A3	KRAB	0.0219913	0.0069492	NA	0.897393	0.557627	23.8806	42.9363
ZNF30	P17039	KRAB	ZNF549	Q6P9A3	KRAB	0.039725	0.0564936	NA	0.875684	0.340284	24.2215	42.9545
ZNF354A	O60765	KRAB	ZNF418	Q8TF45	KRAB	0.0141668	0.00192596	NA	0.448721	-0.189659	23.5669	43.1193
ZNF189	O75820	KRAB	ZNF34	Q8IZ26	KRAB	0.0988744	0.0426909	NA	0.115186	-0.164807	28	43.1193
ZNF263	O14978	SCAN,KRAB	ZNF774	Q6NX45	KRAB	0.181884	0.00439883	NA	NA	-0.119622	8.17996	43.2024
ZNF680	Q8NEM1	KRAB	ZNF582	Q96NG8	KRAB	7.89583e-05	0.00499204	-0.224768	NA	0.146724	26.2799	43.2024
ZNF189	O75820	KRAB	ZNF175	Q9Y473	KRAB	0.0345101	0.000525762	-0.0956188	0.0465719	0.195341	14.2857	43.3107
ZSCAN30	Q86W11	SCAN	ZNF382	Q96SR6	KRAB	0.0339098	0.0080724	NA	0.0318989	0.504558	17.3913	43.3198
ZNF134	P52741	-	ZNF684	Q5T5D7	KRAB	0.0261564	0.00214097	-0.281341	0.0207956	-0.190154	13.4615	43.3333
ZNF16	P17020	-	ZNF419	Q96HQ0	KRAB	0.0416355	0.00361882	0.0775785	0.0595278	-0.107552	16.3823	43.3735
ZNF30	P17039	KRAB	ZNF175	Q9Y473	KRAB	-0.0260266	0.000877578	NA	0.933229	0.00653044	18.7675	43.379
ZNF30	P17039	KRAB	ZNF675	Q8TD23	KRAB	0.00663903	9.9955e-05	NA	-0.00187712	0.245149	26.9531	43.379
ZNF45	Q02386	KRAB	ZNF214	Q9UL59	KRAB	0.00759008	0.00692612	NA	0.757632	-0.419418	22.3058	43.4146
ZNF263	O14978	SCAN,KRAB	ZNF436	Q9C0F3	KRAB	0.0984352	0	NA	0.0440689	-0.335932	11.1842	43.5045
ZNF189	O75820	KRAB	ZNF594	Q96JF6	-	0.056793	0.0265579	NA	0.0338846	0.343222	12.3675	43.662
ZNF264	O43296	KRAB	ZNF41	P51814	KRAB	0.0100531	0.00607887	NA	NA	0.329223	19.403	43.7768
ZNF37A	P17032	KRAB	ZNF33A	Q06730	KRAB	-0.0720253	0.0105456	NA	0.976877	0.745514	32.2165	43.7923
ZSCAN29	Q8IWY8	SCAN	ZNF586	Q9NXT0	KRAB	0.00529391	0.000240038	NA	NA	0.628123	5.51817	43.8356
ZNF85	Q03923	KRAB	ZNF317	Q96PQ6	KRAB	0.0438886	0.0197575	-0.112701	0.10241	0.210137	23.8462	43.8554
ZNF667	Q5HYK9	KRAB	ZFP82	Q8N141	KRAB	-0.00050085	0.00897308	0.152624	0.467806	NA	30.3279	43.8642
ZNF134	P52741	-	ZIM3	Q96PE6	KRAB	0.00134574	0.0029936	NA	0.207327	-0.0946833	13.9175	44.0789
ZNF16	P17020	-	ZNF415	Q09FC8	-	0.144343	0.00487329	NA	NA	-0.107687	15.8333	44.0964
ZFP28	Q8NHY6	KRAB,KRAB	ZNF184	Q99676	KRAB	0.148177	0.00361192	-0.11613	0.348278	-0.00690696	17.551	44.1509
ZNF189	O75820	KRAB	ZNF260	Q3ZCT1	-	0.269684	0.0311826	NA	NA	0.596182	8.42105	44.2177
ZNF418	Q8TF45	KRAB	ZNF184	Q99676	KRAB	-0.0144622	0.000296011	-0.1706	0.515243	-0.0483262	19.5286	44.2344
ZNF543	Q08ER8	KRAB	ZNF582	Q96NG8	KRAB	0.0400587	0.00141643	-0.097099	NA	0.277731	25.3425	44.2897
ZNF684	Q5T5D7	KRAB	ZSCAN31	Q96LW9	SCAN	-0.0114107	0.000876843	NA	0.0230433	-0.0975429	17.6692	44.2922
ZNF30	P17039	KRAB	ZNF667	Q5HYK9	KRAB	0.0103926	0.0152274	NA	0.183638	0.181109	29.6875	44.4191
ZNF774	Q6NX45	KRAB	ZNF214	Q9UL59	KRAB	0.0189165	0.00158015	NA	NA	0.179157	11.828	44.4444
ZNF189	O75820	KRAB	ZNF436	Q9C0F3	KRAB	0.0137403	0.0212946	0.111143	-0.00899133	0.411412	28.4264	44.4444
ZNF189	O75820	KRAB	ZNF774	Q6NX45	KRAB	0.274275	0.00831172	NA	NA	-0.0271574	12.7753	44.4954
ZNF816	Q0VGE8	KRAB	ZNF667	Q5HYK9	KRAB	-0.026932	0.0220206	0.32729	0.359002	-0.150985	23.1884	44.4976
ZNF37A	P17032	KRAB	ZNF543	Q08ER8	KRAB	-0.0369641	0.00246046	NA	NA	0.249073	19.9396	44.5682
ZNF85	Q03923	KRAB	ZNF415	Q09FC8	-	0.0234846	0.00489812	NA	NA	-0.136852	10.6195	44.5783
ZNF528	Q3MIS6	KRAB	ZNF680	Q8NEM1	KRAB	0.0437986	0.0433608	0.250039	NA	0.0153792	26.5625	44.5783
ZNF41	P51814	KRAB	ZNF543	Q08ER8	KRAB	-0.0214243	0	-0.0239691	NA	0.436725	17.402	44.6352
ZNF324	O75467	KRAB	ZNF140	P52738	KRAB	0.00178431	0.0404493	NA	0.817719	0.11059	19.174	44.7273
ZNF708	P17019	-	ZNF415	Q09FC8	-	0.0856342	0.00146242	NA	NA	-0.211951	8.03859	44.8193
ZNF595	Q8IYB9	KRAB	ZNF257	Q9Y2Q1	KRAB	-0.00494096	0.00818821	-0.125998	0.436545	NA	43.8662	44.8498
ZNF35	P13682	-	ZNF667	Q5HYK9	KRAB	0.00894526	0.0621365	NA	0.027294	-0.232051	9.09091	44.9351
ZNF16	P17020	-	ZNF224	Q9NZL3	KRAB	0.0659988	0.00180668	0.0937787	0.0892646	NA	16.5625	44.9393
ZNF189	O75820	KRAB	ZNF667	Q5HYK9	KRAB	-0.0322914	0.0189667	0.0239543	0.282991	0.291265	21.9124	45.0226
ZNF134	P52741	-	ZNF34	Q8IZ26	KRAB	0.000821771	0.0121392	NA	0.122752	0.294467	9.86842	45.092
ZNF260	Q3ZCT1	-	ZNF774	Q6NX45	KRAB	0.335917	0.000154392	NA	NA	-0.308455	5.46448	45.1253
ZNF16	P17020	-	ZNF594	Q96JF6	-	0.00921112	0.00408276	NA	0.132614	0.467078	18.2927	45.2465
ZNF667	Q5HYK9	KRAB	ZNF329	Q86UD4	-	0.00688245	0.0215496	0.103643	0.116603	0.443357	14.9682	45.2632
ZNF45	Q02386	KRAB	ZNF774	Q6NX45	KRAB	0.140393	0.00306611	NA	NA	0.0607037	13.4483	45.3659
ZNF264	O43296	KRAB	ZNF33A	Q06730	KRAB	0.190687	0.0230457	NA	0.338803	0.387439	19.3955	45.3725
ZNF33A	Q06730	KRAB	ZNF175	Q9Y473	KRAB	-0.00010296	0	-0.275314	0.973831	0.0588578	22.3502	45.3933
ZNF37A	P17032	KRAB	ZNF71	Q9NQZ8	-	0.332774	0.0147482	NA	-0.00842219	-0.0173977	1.50376	45.4039
ZNF30	P17039	KRAB	ZNF454	Q8N9F8	KRAB	0.0641129	0.0715309	NA	0.955488	-0.144621	28.8793	45.4338
ZSCAN22	P10073	SCAN	ZNF140	P52738	KRAB	0.0762091	0.0314155	NA	0.0892212	0.418068	15.0171	45.4545
ZNF22	P17026	-	ZNF554	Q86TJ5	KRAB	-0.012284	0.0208588	NA	-0.0735566	-0.207962	2.6506	45.5497
ZNF324	O75467	KRAB	ZNF214	Q9UL59	KRAB	-0.0357535	0.00423457	-0.101513	0.722072	-0.310653	18.0203	45.5882
ZNF146	Q15072	-	ZNF436	Q9C0F3	KRAB	0.067817	0	NA	-0.0114139	0.312056	2.15827	45.6193
ZNF30	P17039	KRAB	ZNF329	Q86UD4	-	0.0177936	0.0752597	NA	0.258811	0.443742	18.0328	45.6621
ZNF595	Q8IYB9	KRAB	ZNF680	Q8NEM1	KRAB	-0.0321643	0.00621709	-0.0698664	NA	NA	50	45.7082
ZNF418	Q8TF45	KRAB	ZNF436	Q9C0F3	KRAB	0.0561962	0.000205677	-0.16268	0.0868112	0.167849	22	45.7471
ZNF324	O75467	KRAB	ZSCAN22	P10073	SCAN	0.0142071	0.152571	-0.067183	0.0489975	0.727573	6.91964	45.749
ZNF98	A6NK75	KRAB	ZNF33A	Q06730	KRAB	-0.0150774	0.025	NA	0.0644407	-0.23336	14.8058	45.8239
ZNF33A	Q06730	KRAB	ZNF543	Q08ER8	KRAB	0.105725	9.4706e-05	-0.133661	NA	0.463563	17.9487	45.8239
ZNF502	Q8TBZ5	-	ZNF224	Q9NZL3	KRAB	0.0261242	0.00159629	0.085354	0.492145	NA	15.6379	45.9514
ZNF502	Q8TBZ5	-	ZNF419	Q96HQ0	KRAB	0.0618631	0.00276881	0.0342534	0.941819	0.0704828	12.8099	45.9948
ZNF34	Q8IZ26	KRAB	ZNF582	Q96NG8	KRAB	0.0196819	0.00129439	NA	0.140637	0.080593	21.9585	46.0123
ZNF415	Q09FC8	-	ZNF528	Q3MIS6	KRAB	-0.0265432	0.00635535	NA	NA	0.283029	21.4286	46.2651
ZNF33A	Q06730	KRAB	ZNF436	Q9C0F3	KRAB	-0.0327236	0	-0.256852	0.0813845	0.296953	11.3821	46.2754
ZNF45	Q02386	KRAB	ZNF34	Q8IZ26	KRAB	0.0477813	0.02806	NA	0.178478	-0.0500828	20.1987	46.3415
ZNF189	O75820	KRAB	ZNF224	Q9NZL3	KRAB	-0.00522952	0.0206653	0.142072	0.184287	NA	23.4783	46.3563
ZNF436	Q9C0F3	KRAB	ZNF768	Q9H5H4	-	0.0514717	0.00884244	0.213099	0.545245	-0.291906	12.0915	46.5257
ZNF708	P17019	-	ZNF33A	Q06730	KRAB	0.0213008	0.00158441	-0.0383243	0.646482	0.707064	5.51181	46.7091
ZNF189	O75820	KRAB	ZNF708	P17019	-	0.100749	0.0155127	0.102973	0.0471799	0.546695	7.84314	46.7811
ZNF37A	P17032	KRAB	ZNF175	Q9Y473	KRAB	0.0621898	0.00475859	NA	0.962058	0.20082	26.0638	46.8144
ZNF37A	P17032	KRAB	ZSCAN30	Q86W11	SCAN	-0.0060168	0.0080207	NA	0.0166007	0.461114	12.4688	46.9091
ZNF34	Q8IZ26	KRAB	ZNF768	Q9H5H4	-	0.0866836	0.0151515	NA	0.171577	0.175516	10.3535	46.9325
ZNF85	Q03923	KRAB	ZNF331	Q9NQX6	KRAB	0.0424876	0.0160776	NA	0.0151026	0.226466	28.4153	46.988
ZNF189	O75820	KRAB	ZNF816	Q0VGE8	KRAB	0.154054	0.0650408	-0.0833265	0.179503	0.316098	24.3446	47.3002
ZNF317	Q96PQ6	KRAB	ZNF331	Q9NQX6	KRAB	0.0438737	0.0222252	NA	0.0735083	-0.0574689	21.5447	47.3538
ZNF134	P52741	-	ZNF329	Q86UD4	-	0.109354	0.0399598	-0.220349	0.439747	0.169545	16.5939	47.432
ZNF85	Q03923	KRAB	ZNF34	Q8IZ26	KRAB	-0.0463743	0.0287423	NA	0.106985	-0.0298393	22.3077	47.4699
ZNF415	Q09FC8	-	ZNF610	Q8N9Z0	KRAB	0.131686	0.00855967	NA	NA	0.582229	23.7952	47.5248
ZNF30	P17039	KRAB	ZNF224	Q9NZL3	KRAB	0.0298328	0.0372941	NA	0.532739	NA	24.1107	47.5709
ZFP28	Q8NHY6	KRAB,KRAB	ZNF317	Q96PQ6	KRAB	0.0308911	0.0103891	0.142229	-0.0611299	-0.303905	15.0579	47.6804
ZNF30	P17039	KRAB	ZNF331	Q9NQX6	KRAB	0.0552266	0.0396771	NA	0.910142	-0.0526111	23.8342	47.7169
ZNF582	Q96NG8	KRAB	ZNF331	Q9NQX6	KRAB	0.0669771	0.0049503	NA	0.955301	0.108183	19.6296	47.7341
ZNF134	P52741	-	ZNF350	Q9GZX5	KRAB	-0.0277672	0.0250924	0.117422	0.216669	NA	9.85075	47.7778
ZNF34	Q8IZ26	KRAB	ZNF214	Q9UL59	KRAB	-0.043238	0.00780633	NA	0.250773	-0.0691741	13.4118	47.8659
ZNF667	Q5HYK9	KRAB	ZNF331	Q9NQX6	KRAB	0.184426	0.0202686	NA	0.110651	0.299405	19.2771	47.8947
ZNF30	P17039	KRAB	ZFP3	Q96NJ6	-	0.00170577	0.0168295	NA	0.300025	0.340986	16.1137	47.9452
ZNF140	P52738	KRAB	ZNF677	Q86XU0	KRAB	0.0691037	0.00172977	NA	0.274324	-0.220659	22.449	48.0519
ZNF264	O43296	KRAB	ZNF677	Q86XU0	KRAB	-0.0171156	0.00503344	NA	0.0670817	0.19368	17.4387	48.0556
ZNF543	Q08ER8	KRAB	ZNF419	Q96HQ0	KRAB	0.0777801	0	-0.154502	NA	0.311807	26.087	48.1894
ZNF774	Q6NX45	KRAB	ZNF175	Q9Y473	KRAB	0.0406979	0.00120731	NA	NA	-0.160222	12.0643	48.1994
ZNF136	P52737	KRAB	ZNF563	Q8TA94	KRAB	-0.0168817	0.000422778	NA	0.650752	-0.0867345	41.2621	48.1994
ZNF41	P51814	KRAB	ZNF502	Q8TBZ5	-	-0.00298593	0.000339707	-0.078869	NA	0.00381526	8.16327	48.2833
ZNF30	P17039	KRAB	ZNF184	Q99676	KRAB	-0.0167803	0.0192931	NA	0.474071	0.126486	22.9885	48.3932
GLI4	P10075	-	ZNF684	Q5T5D7	KRAB	0.00596895	0.00539595	NA	0.265633	-0.165957	6.59722	48.4018
ZNF30	P17039	KRAB	ZFP82	Q8N141	KRAB	-0.0039466	0.0212183	NA	0.470479	NA	35.7798	48.4018
ZFP82	Q8N141	KRAB	ZNF582	Q96NG8	KRAB	7.06086e-05	0.00243216	0.346276	0.405066	NA	31.4079	48.4663
ZNF140	P52738	KRAB	ZFP82	Q8N141	KRAB	0.0465184	0.00352643	NA	0.493279	NA	40	48.4663
ZNF320	A2RRD8	KRAB	ZNF140	P52738	KRAB	0.0296674	0.0202225	NA	0.64083	0.0878204	30.2128	48.5149
ZNF273	Q14593	KRAB	ZNF610	Q8N9Z0	KRAB	0.134508	0.012106	0.189289	0.109935	0.349371	26.0736	48.5185
ZNF16	P17020	-	ZNF667	Q5HYK9	KRAB	0.0934267	0.0212766	-0.310132	0.317503	-0.246187	15.5488	48.5577
ZNF41	P51814	KRAB	ZNF224	Q9NZL3	KRAB	0.0572379	0.000602504	0.138345	NA	NA	20.2817	48.583
ZNF85	Q03923	KRAB	ZNF273	Q14593	KRAB	0.00300255	0.00788566	0.401216	0.257437	0.620238	47.3333	48.6747
ZNF667	Q5HYK9	KRAB	ZNF71	Q9NQZ8	-	-0.0320369	0.0207028	NA	0.0464831	0.137812	14.2308	48.6842
ZNF136	P52737	KRAB	ZNF596	Q8TC21	KRAB	-0.0215472	0.0168106	NA	0.747723	0.138678	25.4098	48.7465
ZNF121	P58317	-	ZNF778	Q96MU6	KRAB	-0.0310377	0.0475636	NA	0.63284	0.191598	19.4286	48.8127
ZNF774	Q6NX45	KRAB	ZNF502	Q8TBZ5	-	0.0246483	0.00327005	NA	NA	0.251409	11.8943	48.8372
ZNF329	Q86UD4	-	ZNF675	Q8TD23	KRAB	-0.00352857	0	-0.0765693	0.0275214	0.344287	20.5128	48.8827
ZNF45	Q02386	KRAB	ZNF175	Q9Y473	KRAB	0.13824	0.000347712	NA	0.961607	0.156377	26.9022	49.0244
ZNF189	O75820	KRAB	ZNF250	P15622	KRAB	0.0106145	6.5901e-05	-0.122149	-0.0177681	0.0902117	27.9817	49.0826
ZNF30	P17039	KRAB	ZNF543	Q08ER8	KRAB	0.0722806	0.0205804	NA	NA	-0.00972403	22.2672	49.0868
ZNF320	A2RRD8	KRAB	ZNF816	Q0VGE8	KRAB	0.213695	0.0345627	-0.286114	0.617808	0.327174	48.9712	49.1607
ZNF189	O75820	KRAB	ZFP3	Q96NJ6	-	0.0321406	0.0191421	0.0753676	0.0723764	0.484017	16.1435	49.3119
ZNF250	P15622	KRAB	ZNF33A	Q06730	KRAB	0.0525784	0.00469484	0.115561	0.11945	0.290523	15.3061	49.4357
ZNF547	Q8IVP9	KRAB	ZNF419	Q96HQ0	KRAB	0.00169496	0.0207305	NA	0.398685	0.295532	28.91	49.505
ZNF677	Q86XU0	KRAB	ZIM3	Q96PE6	KRAB	0.141864	0.000556793	NA	0.193055	0.068819	21.7241	49.5146
ZNF41	P51814	KRAB	ZNF175	Q9Y473	KRAB	0.0617417	0.0179495	-0.112347	NA	-0.053061	30.5	49.5708
ZNF595	Q8IYB9	KRAB	ZNF675	Q8TD23	KRAB	-0.0187109	0.00270819	0.0918168	0.028647	NA	47.6987	49.5708
ZNF264	O43296	KRAB	ZNF680	Q8NEM1	KRAB	-0.0682664	0.0285546	NA	NA	0.317424	19.6203	49.5822
ZNF34	Q8IZ26	KRAB	ZNF175	Q9Y473	KRAB	0.0228457	0	NA	0.161447	0.0139606	16.7089	49.5845
ZNF554	Q86TJ5	KRAB	ZSCAN29	Q8IWY8	SCAN	-0.0146018	0.0114244	NA	NA	0.159869	10.6771	49.7382
ZNF684	Q5T5D7	KRAB	ZSCAN30	Q86W11	SCAN	-0.0316697	0.00515056	NA	-0.0251116	0.0804614	9.81013	49.7717
ZNF121	P58317	-	ZNF146	Q15072	-	0.0238736	0	NA	0.0976653	0.873363	4.69799	49.8182
ZNF260	Q3ZCT1	-	ZNF436	Q9C0F3	KRAB	0.0926485	0	NA	NA	0.528586	7.10059	49.8607
ZNF16	P17020	-	ZNF260	Q3ZCT1	-	0.0284729	0.00182482	NA	NA	-0.132935	7.66423	49.8795
ZNF264	O43296	KRAB	ZFP28	Q8NHY6	KRAB,KRAB	-0.0298601	8.3563e-05	NA	0.207051	0.577534	18.4314	50
ZNF250	P15622	KRAB	ZNF30	P17039	KRAB	0.0343119	0.00960474	NA	0.108382	0.528174	26.9767	50.2283
ZNF543	Q08ER8	KRAB	ZNF528	Q3MIS6	KRAB	-0.000399836	0.0136398	-0.00421702	NA	0.00436357	21.6418	50.3614
ZNF45	Q02386	KRAB	ZNF224	Q9NZL3	KRAB	0.00483106	0.0224738	NA	0.52091	NA	40.0735	50.4049
ZNF41	P51814	KRAB	ZNF184	Q99676	KRAB	0.0742636	0.00195478	0.397915	NA	0.268016	21.4674	50.4726
ZNF502	Q8TBZ5	-	ZNF175	Q9Y473	KRAB	-0.0348674	0	-0.321536	0.96887	0.722153	10.5556	50.646
ZNF677	Q86XU0	KRAB	ZNF582	Q96NG8	KRAB	-0.0096761	0	-0.137681	0.197451	0.430278	25	50.6494
ZNF549	Q6P9A3	KRAB	ZNF175	Q9Y473	KRAB	-0.0056423	0.00062709	NA	0.858451	0.133445	21.7507	50.6887
ZNF774	Q6NX45	KRAB	ZFP3	Q96NJ6	-	0.123505	0.00209644	NA	NA	0.496395	21.0227	50.6964
ZNF774	Q6NX45	KRAB	ZNF454	Q8N9F8	KRAB	0.0356308	0.00385357	NA	NA	0.112022	12.2951	50.7553
ZNF37A	P17032	KRAB	ZNF436	Q9C0F3	KRAB	0.115615	0.0010211	NA	0.0772783	0.230635	17.6271	50.7553
ZNF563	Q8TA94	KRAB	ZNF596	Q8TC21	KRAB	0.00728878	0.00387275	NA	0.723237	0.506777	19.9115	50.8197
ZNF708	P17019	-	ZNF273	Q14593	KRAB	0.113745	0.00189609	0.161165	0.168031	0.658511	20.4013	50.8434
MAZ	P56270	-	PATZ1	Q9HBE1	BTB	0.856217	0.276556	NA	0.0666715	0.788065	14.9593	50.8671
ZNF502	Q8TBZ5	-	ZNF436	Q9C0F3	KRAB	0.00872294	0.000548145	0.137915	0.0872394	0.360203	14.6465	51.1628
ZNF594	Q96JF6	-	ZNF184	Q99676	KRAB	0.0603813	0.00438757	NA	-0.00322785	0.447443	8.10056	51.2111
ZNF45	Q02386	KRAB	ZFP3	Q96NJ6	-	0.0629002	0.00211599	NA	0.32232	0.473593	15.6364	51.2195
ZNF30	P17039	KRAB	ZNF41	P51814	KRAB	-0.0113313	0.00715244	NA	NA	0.365424	18.7675	51.7167
ZNF33A	Q06730	KRAB	ZFP28	Q8NHY6	KRAB,KRAB	-0.0168649	0.00472308	-0.276375	0.530578	-0.169776	21.1786	51.8018
ZNF354A	O60765	KRAB	ZFP28	Q8NHY6	KRAB,KRAB	0.00584803	0.000638978	NA	0.475491	0.051254	18.4	51.8041
ZNF16	P17020	-	ZNF543	Q08ER8	KRAB	-0.0197996	8.3491e-05	0.0171097	NA	0.48816	18.0952	51.8072
ZNF35	P13682	-	ZNF37A	P17032	KRAB	0.0596292	0.00578263	NA	0.158783	0.19819	8.03109	51.8152
ZNF34	Q8IZ26	KRAB	ZNF502	Q8TBZ5	-	-0.000729391	0.00485025	NA	0.155551	0.0836549	9.28571	51.938
ZNF454	Q8N9F8	KRAB	ZNF502	Q8TBZ5	-	0.0464538	0.00231757	-0.083756	0.956801	0.412747	12.6087	51.938
ZNF98	A6NK75	KRAB	ZNF528	Q3MIS6	KRAB	0.0358807	0.00594927	NA	0.0172591	-0.247559	22.5352	52.0482
ZFP28	Q8NHY6	KRAB,KRAB	ZNF331	Q9NQX6	KRAB	-0.0251475	0.00899604	NA	0.468341	0.243025	11.3821	52.0619
ZNF415	Q09FC8	-	ZNF677	Q86XU0	KRAB	-0.00473135	7.5455e-05	NA	NA	0.525073	24.1758	52.0833
ZNF98	A6NK75	KRAB	ZNF415	Q09FC8	-	-0.0180135	0.000803037	NA	NA	0.413545	7.17822	52.0891
ZNF35	P13682	-	ZNF71	Q9NQZ8	-	0.161457	0.173386	NA	0.194427	0.0933804	11.0687	52.3677
ZNF250	P15622	KRAB	ZNF675	Q8TD23	KRAB	-0.00493487	0	-0.184504	-0.0537452	-0.045619	22.1374	52.3677
ZNF30	P17039	KRAB	ZFP28	Q8NHY6	KRAB,KRAB	-0.0329031	0.0116108	NA	0.607714	-0.152612	17.418	52.3918
ZNF134	P52741	-	ZNF419	Q96HQ0	KRAB	-0.00376355	0	0.240828	0.261936	0.529926	18.0328	52.4752
ZNF415	Q09FC8	-	ZNF680	Q8NEM1	KRAB	0.033218	0.00322219	NA	NA	-0.00149562	12.1037	52.568
ZNF34	Q8IZ26	KRAB	ZNF680	Q8NEM1	KRAB	0.122919	0.0114462	NA	NA	-0.193906	24.1509	52.568
ZNF85	Q03923	KRAB	ZNF33A	Q06730	KRAB	0.0196088	0.000740015	-0.294008	-0.0151075	0.408718	15.9574	52.5959
ZNF189	O75820	KRAB	ZNF45	Q02386	KRAB	0.119245	0.0181987	NA	0.104359	0.271708	20.1389	52.6077
ZNF33A	Q06730	KRAB	ZNF502	Q8TBZ5	-	0.0619708	0.000946671	0.161793	0.96536	0.0962982	10.705	52.8217
ZNF189	O75820	KRAB	ZNF502	Q8TBZ5	-	0.0272929	0.00334099	-0.0702834	0.0699721	0.239698	13.3929	52.8345
ZNF354A	O60765	KRAB	ZNF34	Q8IZ26	KRAB	-0.0232523	0.0103407	NA	0.129361	-0.271553	27.8746	52.9248
ZNF250	P15622	KRAB	ZNF34	Q8IZ26	KRAB	0.0518909	0.00157829	NA	0.0106409	0.372369	30.038	52.9248
ZNF329	Q86UD4	-	ZNF502	Q8TBZ5	-	0.0496252	0.00745142	-0.0525079	0.311845	0.1064	13.4921	52.9716
ZNF33A	Q06730	KRAB	ZNF528	Q3MIS6	KRAB	-0.00725567	0.0206194	-0.260667	0.474936	-0.02434	17.8378	53.0474
ZNF354A	O60765	KRAB	ZNF454	Q8N9F8	KRAB	0.0193422	0.00926334	NA	0.960099	-0.180009	28.9683	53.1073
ZNF250	P15622	KRAB	ZNF549	Q6P9A3	KRAB	0.0690156	1.5665e-05	NA	0.109126	0.302427	19.2926	53.1856
ZNF16	P17020	-	ZNF30	P17039	KRAB	0.00338703	0.0105157	NA	0.0426719	0.0396067	15.4341	53.1963
ZNF85	Q03923	KRAB	ZNF257	Q9Y2Q1	KRAB	0.0637344	0.0172962	-0.425882	0.0278902	0.687909	50.9294	53.253
ZNF85	Q03923	KRAB	ZFP28	Q8NHY6	KRAB,KRAB	0.00501079	0.00368738	0.0637612	0.0404818	-0.226789	10.6033	53.3654
ZNF22	P17026	-	ZSCAN29	Q8IWY8	SCAN	-0.0378496	0.00173913	NA	NA	0.364404	3.3237	53.3742
ZNF250	P15622	KRAB	ZNF454	Q8N9F8	KRAB	0.0353567	0.0131904	-0.28395	0.113357	0.035003	30.9417	53.4819
ZNF354A	O60765	KRAB	ZNF502	Q8TBZ5	-	-0.025493	0.00122468	NA	0.973847	-0.0741086	12.1771	53.4884
ZNF677	Q86XU0	KRAB	ZNF680	Q8NEM1	KRAB	0.216426	4.3862e-05	-0.196584	NA	-0.308732	21.9512	53.5294
ZNF543	Q08ER8	KRAB	ZFP28	Q8NHY6	KRAB,KRAB	-0.00334821	0.000380662	0.103749	NA	0.312148	15.3846	53.6082
ZNF264	O43296	KRAB	ZNF175	Q9Y473	KRAB	-0.0225772	0.000363748	NA	0.333947	0.700469	21.4286	53.7396
ZNF415	Q09FC8	-	ZNF273	Q14593	KRAB	0.0553718	0.00140252	NA	NA	0.00759419	19.3989	53.7954
ZNF22	P17026	-	ZNF394	Q53GI3	SCAN,KRAB	-0.0049749	0.00129826	NA	-0.0565329	0.496245	3.53774	53.7975
ZNF354A	O60765	KRAB	ZNF436	Q9C0F3	KRAB	-0.028706	0	NA	0.0843703	0.479508	20.1581	53.9548
ZNF708	P17019	-	ZNF257	Q9Y2Q1	KRAB	0.0109346	0.000868558	-0.116487	0.521936	0.481573	22.5926	53.9759
ZNF250	P15622	KRAB	ZNF329	Q86UD4	-	0.0375439	0.0129087	0.193135	0.054056	0.0552151	18.4874	54.039
ZNF98	A6NK75	KRAB	ZNF595	Q8IYB9	KRAB	-0.0476004	0.00397786	NA	0.0695374	NA	46.3303	54.2918
ZNF543	Q08ER8	KRAB	ZNF331	Q9NQX6	KRAB	0.105871	0.00277913	NA	NA	0.442263	19.7581	54.3175
ZNF35	P13682	-	ZNF329	Q86UD4	-	-0.0308456	0.0844549	NA	0.257239	0.202988	17.6471	54.3807
ZNF16	P17020	-	ZNF816	Q0VGE8	KRAB	-0.0287246	0.00621039	-0.216147	0.116132	0.122405	11.9534	54.4365
ZNF34	Q8IZ26	KRAB	ZFP3	Q96NJ6	-	0.0452538	0.0105115	NA	0.160574	0.158681	13.5849	54.5961
ZNF394	Q53GI3	SCAN,KRAB	ZSCAN29	Q8IWY8	SCAN	-0.0169541	0.00218619	NA	NA	0.590266	13.2442	54.6012
ZNF45	Q02386	KRAB	ZNF502	Q8TBZ5	-	0.00524173	0.003129	NA	0.965194	0.0723674	12.1622	54.6988
ZNF16	P17020	-	ZNF528	Q3MIS6	KRAB	0.0196533	0.00890174	-0.028164	0.0636621	-0.150846	15.3595	54.6988
ZFP3	Q96NJ6	-	ZNF175	Q9Y473	KRAB	0.0165342	0.000162787	-0.435552	0.384452	0.0109004	9.13978	54.8476
ZNF543	Q08ER8	KRAB	ZNF175	Q9Y473	KRAB	0.009021	0	0.158025	NA	0.262602	14.8148	54.8476
ZNF260	Q3ZCT1	-	ZFP3	Q96NJ6	-	0.0942518	0.00828566	NA	NA	0.403999	6.25	54.8747
ZNF37A	P17032	KRAB	ZNF146	Q15072	-	0.0691306	0	NA	0.0851975	0.620277	2.78746	54.9091
ZNF41	P51814	KRAB	ZNF33A	Q06730	KRAB	0.00115897	0.0091954	0.0878509	NA	0.839503	20.7819	55.1502
ZNF528	Q3MIS6	KRAB	ZNF502	Q8TBZ5	-	0.00996339	0.000796512	-0.2353	0.469852	0.287093	3.75	55.1807
ZNF37A	P17032	KRAB	ZNF382	Q96SR6	KRAB	-0.0294902	0.00222035	NA	0.972385	0.359712	29.5393	55.2727
ZNF774	Q6NX45	KRAB	ZNF329	Q86UD4	-	0.0650421	0.00498582	NA	NA	-0.162347	7.69231	55.287
ZNF16	P17020	-	ZNF502	Q8TBZ5	-	0.065387	0.00191939	-0.101604	0.00706747	0.36254	16.1172	55.4217
ZNF774	Q6NX45	KRAB	ZNF34	Q8IZ26	KRAB	0.226912	0.00607197	NA	NA	0.292355	11.2628	55.5891
ZNF543	Q08ER8	KRAB	ZNF502	Q8TBZ5	-	0.0550687	0	-0.0794397	NA	0.558315	9.90099	56.0724
ZNF708	P17019	-	ZNF528	Q3MIS6	KRAB	-0.0151098	0.0103997	-0.21658	0.278154	0.127934	8.07175	56.1905
ZNF30	P17039	KRAB	ZNF33A	Q06730	KRAB	-0.00879248	0.00924449	NA	0.968162	0.47129	17.0543	56.2077
ZNF189	O75820	KRAB	ZNF16	P17020	-	0.0377392	0.0293226	-0.0508949	0.110891	-0.0318733	15.4098	56.2358
ZNF264	O43296	KRAB	ZNF250	P15622	KRAB	-0.0148811	0.000271834	NA	0.0483215	-0.257627	17.5	56.546
ZNF708	P17019	-	ZNF680	Q8NEM1	KRAB	-0.0229809	0.000188164	0.0712784	NA	0.583389	27.6382	56.6265
ZNF250	P15622	KRAB	ZFP28	Q8NHY6	KRAB,KRAB	-0.00698394	0	-0.0431192	0.0656133	-0.109723	12.5506	56.701
ZNF34	Q8IZ26	KRAB	ZNF454	Q8N9F8	KRAB	-0.00334434	0.0413428	NA	0.192156	0.268032	28.9062	56.7485
ZNF354A	O60765	KRAB	ZNF250	P15622	KRAB	-0.0152588	0	NA	0.121137	0.166695	24.0132	56.8245
ZNF250	P15622	KRAB	ZNF436	Q9C0F3	KRAB	0.13578	0	-0.217367	0.0255005	0.246954	27.4419	56.8245
ZNF502	Q8TBZ5	-	ZFP3	Q96NJ6	-	0.057447	0.00236655	0.34574	0.326892	0.268706	20.8333	56.8475
ZNF37A	P17032	KRAB	ZNF140	P52738	KRAB	0.157407	0.00476073	NA	0.846313	0.469279	19.9405	57.0909
ZNF98	A6NK75	KRAB	ZNF273	Q14593	KRAB	0.040391	0.00211074	NA	0.119347	-0.0751024	54.5151	57.3816
ZNF329	Q86UD4	-	ZNF454	Q8N9F8	KRAB	0.0492488	0.0525628	-0.114164	0.291467	0.194468	9.90099	57.4018
ZNF34	Q8IZ26	KRAB	ZNF436	Q9C0F3	KRAB	0.0236809	0.00544293	NA	0.0598485	0.10834	22.0472	57.4018
ZNF250	P15622	KRAB	ZNF543	Q08ER8	KRAB	0.110117	7.3318e-05	0.123877	NA	-0.0966186	20.2703	58.7744
ZNF85	Q03923	KRAB	ZNF528	Q3MIS6	KRAB	0.0905355	0.0294969	-0.0725653	-0.0410908	0.277177	25.523	58.7952
ZNF85	Q03923	KRAB	ZNF680	Q8NEM1	KRAB	-0.0152007	0.000845717	0.123364	NA	0.283738	68.5	58.7952
ZFP82	Q8N141	KRAB	ZNF331	Q9NQX6	KRAB	-0.0163197	0.0152672	NA	0.441478	NA	28.7736	58.9124
ZNF134	P52741	-	ZNF547	Q8IVP9	KRAB	0.0756951	0.0127042	NA	0.0954422	0.336604	16.5	59.2593
ZNF85	Q03923	KRAB	ZNF502	Q8TBZ5	-	0.131159	0.00147244	-0.112632	-0.0129122	-0.0418799	14.4144	59.2771
ZNF708	P17019	-	ZNF595	Q8IYB9	KRAB	-0.00538832	0.00521105	0.0873558	0.382157	NA	20.8556	59.7077
ZNF774	Q6NX45	KRAB	ZNF436	Q9C0F3	KRAB	0.0180141	0.0037513	NA	NA	0.0734475	18.4358	59.8187
ZNF454	Q8N9F8	KRAB	ZNF675	Q8TD23	KRAB	0.0578692	0.000115427	0.0545346	-0.00645814	-0.313072	22.5352	60.303
ZNF273	Q14593	KRAB	ZNF675	Q8TD23	KRAB	-0.0272058	0.00285578	-0.309676	0.153901	0.791257	53.8462	60.303
GLI4	P10075	-	ZSCAN30	Q86W11	SCAN	0.0245321	0.0380967	NA	-0.0462633	0.255679	14.881	60.733
ZNF273	Q14593	KRAB	ZNF680	Q8NEM1	KRAB	0.0317399	0.0287157	0.1901	NA	0.36458	53.5117	61.0272
ZNF85	Q03923	KRAB	ZNF595	Q8IYB9	KRAB	0.00149547	0.0252124	0.307823	0.0950007	NA	55.6757	61.5711
ZNF708	P17019	-	ZNF675	Q8TD23	KRAB	-0.0207412	0.00393866	-0.0268902	0.139523	0.711726	20.5761	61.6867
ZNF98	A6NK75	KRAB	ZNF257	Q9Y2Q1	KRAB	0.0455196	0.00256867	NA	0.162447	0.0856404	49.4624	62.8809
ZNF680	Q8NEM1	KRAB	ZNF257	Q9Y2Q1	KRAB	0.0142178	0.00362618	-0.238935	NA	0.394878	49.1039	63.3634
ZNF85	Q03923	KRAB	ZNF675	Q8TD23	KRAB	-0.00988208	0.000452375	-0.106316	0.345865	0.762123	56.6667	63.3735
ZNF273	Q14593	KRAB	ZNF257	Q9Y2Q1	KRAB	0.0561337	0.00530191	-0.608871	0.283276	0.363742	58.1169	63.6667
ZNF98	A6NK75	KRAB	ZNF680	Q8NEM1	KRAB	0.209649	0	NA	NA	0.0689354	71.831	64.9025
ZNF146	Q15072	-	ZNF260	Q3ZCT1	-	0.473435	0.271935	NA	NA	0.844568	12.069	64.9718
ZNF675	Q8TD23	KRAB	ZNF257	Q9Y2Q1	KRAB	0.00553577	0.000495442	0.445114	0.0192804	0.53148	58.209	65.7658
ZNF680	Q8NEM1	KRAB	ZNF675	Q8TD23	KRAB	0.0881296	7.8107e-05	-0.302186	NA	0.47674	52.988	66.0661
ZBTB6	Q15916	BTB	ZBTB26	Q9HCK0	BTB	-0.0115515	0.0734097	NA	0.118442	0.560518	32.7273	66.6667
ZNF98	A6NK75	KRAB	ZNF85	Q03923	KRAB	-0.0591151	0.00634761	NA	0.182716	0.0165188	63.0841	66.747
ZNF98	A6NK75	KRAB	ZNF708	P17019	-	0.0453165	5.4992e-05	NA	0.0197226	-0.101477	25.3521	66.988
ZNF708	P17019	-	ZNF85	Q03923	KRAB	0.00508697	0.00134693	0.242817	0.251231	0.521803	31.8681	67.0429
KLF10	Q13118	-	KLF14	Q8TD94	-	0.791761	0.0589119	NA	-0.000298232	NA	17.1362	69.8795
ZNF98	A6NK75	KRAB	ZNF675	Q8TD23	KRAB	0.119915	0	NA	0.0882599	-0.0580794	54.4355	69.9164
SP1	P08047	-	SP2	Q02086	-	0.467092	0.287539	0.106226	NA	0.401485	26.3017	73.494
SP2	Q02086	-	SP4	Q02446	-	0.603403	0.466632	0.33682	NA	0.46501	29.7959	78.3133
ZNF264	O43296	KRAB	ZNF543	Q08ER8	KRAB	0.0135985	0.0171369	NA	NA	0.610149	56.4103	78.8301
KLF7	O75840	-	KLF1	Q13351	-	0.808713	0.0655679	NA	-0.00877578	0.280135	2.39651	79.5181
ZBTB42	B2RXF5	BTB	ZBTB18	Q99592	BTB	0.98251	0.186236	NA	0.512324	-0.317533	32.8889	84.7619
SP1	P08047	-	SP4	Q02446	-	0.577523	0.447866	0.341153	NA	0.459117	34.8692	87.9518
EGR2	P11161	-	EGR3	Q06889	-	0.962728	0.496868	0.58683	0.5353	0.562806	35.0365	91.358
