# Supplementary material for: Multiparameter functional diversity of human C2H2 zinc finger proteins
Source: HighWire-hosted journal article supplement (doi:10.1101/gr.209643.116), 2016-11-16
Supplement: Supplemental_Figure_S5.pdf [file Supplemental_Figure_S5.pdf]

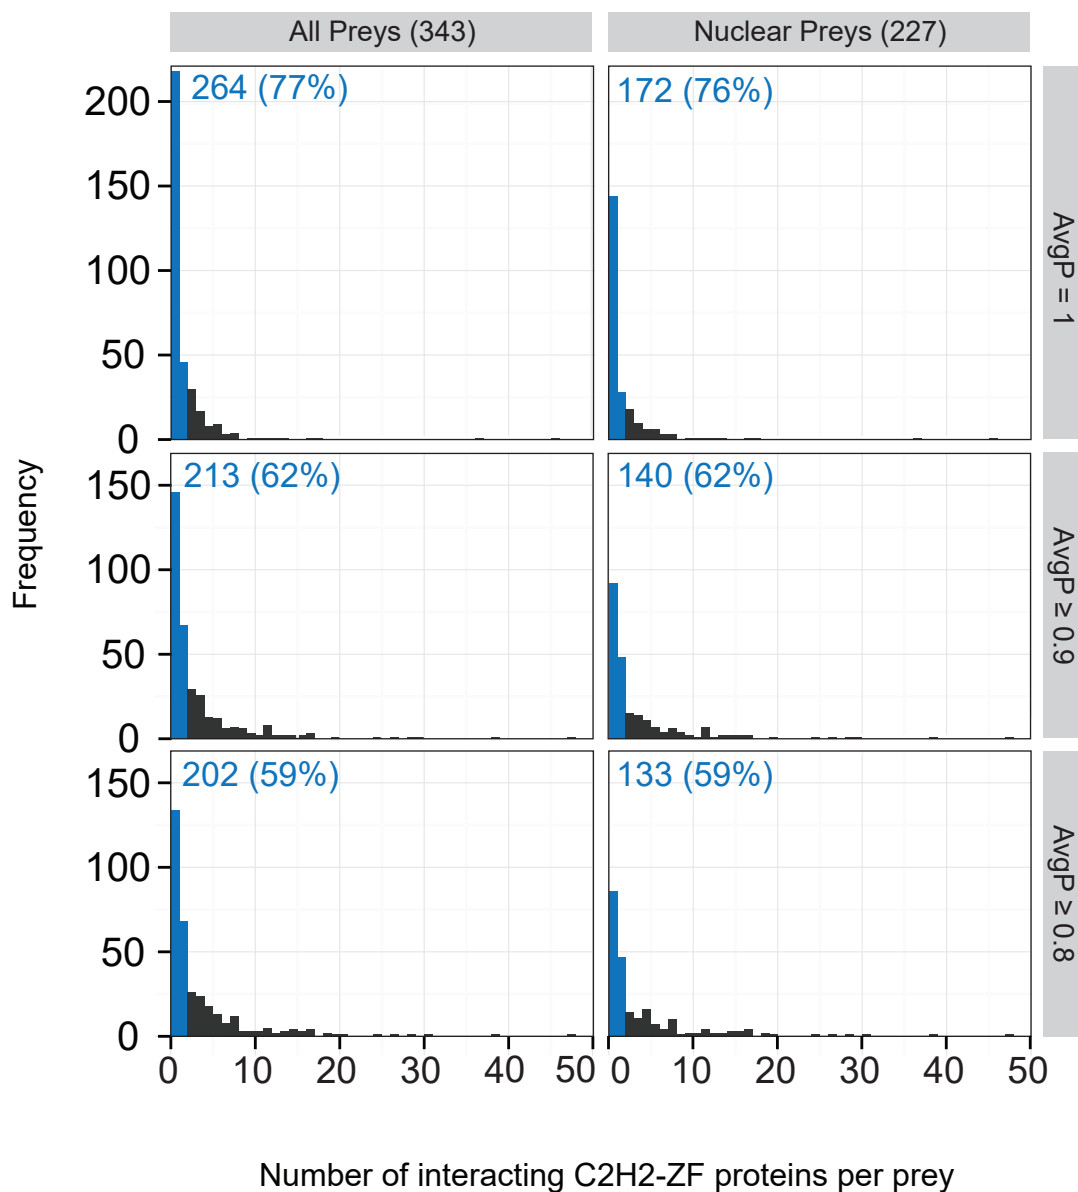

**Supplemental Figure S5: (related to Figure 5). Shared interactions between C2H2-ZF proteins.** The histograms display the distribution of number of C2H2-ZF proteins that purified with each prey at a given confidence score cutoff to define the interaction (including/excluding cytoplasmic preys). The results presented in Figure 5 correspond to the plot with nuclear preys and AvgP  $\geq 0.9$  (middle right). Blue columns indicate the total number of preys that interact with only one or two of the 118 C2H2-ZFPs examined by AP-MS.
