# Supplementary material for: Multiparameter functional diversity of human C2H2 zinc finger proteins
Source: HighWire-hosted journal article supplement (doi:10.1101/gr.209643.116), 2016-11-16
Supplement: Supplemental_Figure_S8.pdf [file Supplemental_Figure_S8.pdf]

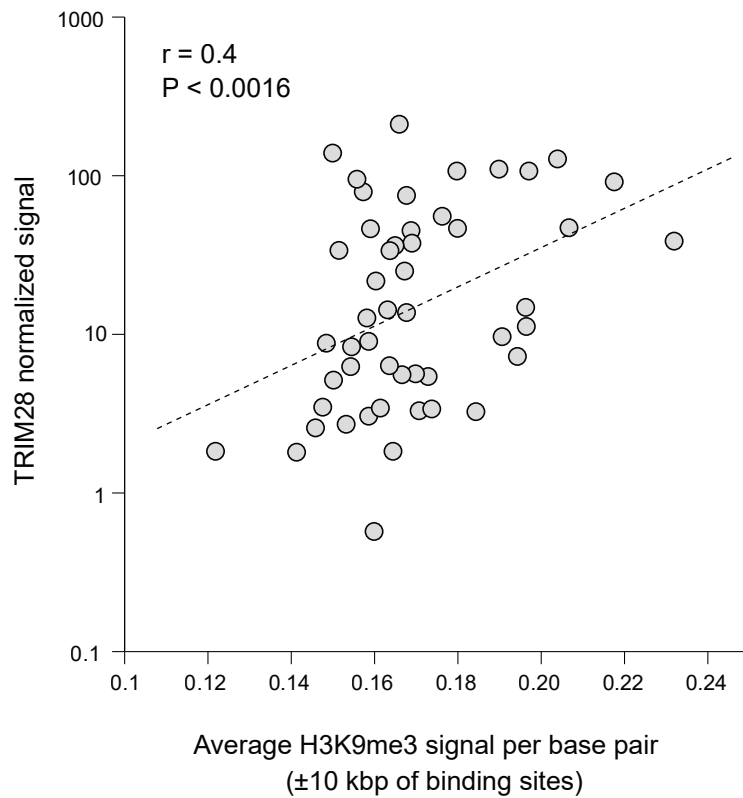

**Supplemental Figure S8 (related to Figure 5): Correlation between TRIM28 association and H3K9me3 signals.** Scatterplot of TRIM28 signal vs. H3K9me3 signal for the 50 KRAB proteins that were studied by AP-MS and ChIP-seq. The Pearson correlation is calculated using the log-transformed TRIM28 signal.
