# Supplementary material for: Multiparameter functional diversity of human C2H2 zinc finger proteins
Source: HighWire-hosted journal article supplement (doi:10.1101/gr.209643.116), 2016-11-16
Supplement: Supplemental_Figure_S9.pdf [file Supplemental_Figure_S9.pdf]

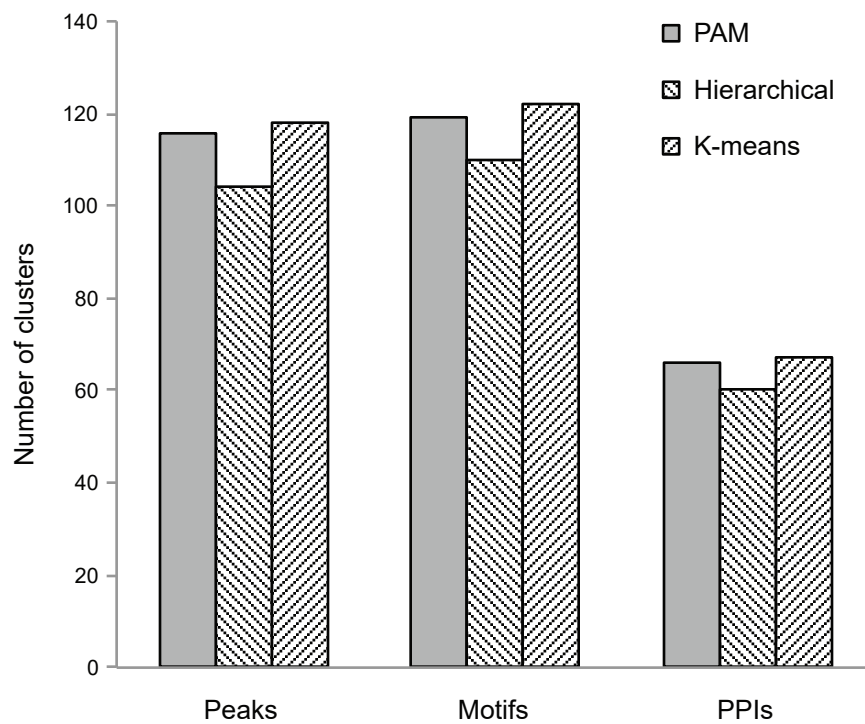

**Supplemental Figure S9 (related to Figure 7): Number of clusters that are obtained for different parameters of C2H2-ZF proteins using different clustering methods.** In each case, the largest number of clusters that results in 95% of the maximum silhouette value is shown.
